# Supplementary material
Source: PubMed Central journal article supplement (PMC3703778)
Supplement: NIHMS481145-supplement-01.pdf [file NIHMS481145-supplement-01.pdf]

## Supplemental Table 1. PMN genes differentially expressed following interaction with F.

| Affymatrix probeset | Gene title                                                                     | Gene symbol       | Entrez |
|---------------------|--------------------------------------------------------------------------------|-------------------|--------|
| 240420_at           | arylacetamide deacetylase-like 2                                               | AADACL2           | 344752 |
| 228041_at           | 2-aminoadipic 6-semialdehyde dehydrogenase                                     | AASDH             | 132949 |
| 202169_s_at         | aminoadipate-semialdehyde dehydrogenase-phosphopantetheinyl transferase        | AASDHPPT          | 60496  |
| 209165_at           | apoptosis antagonizing transcription factor                                    | AATF              | 26574  |
| 205986_at           | apoptosis-associated tyrosine kinase                                           | AATK              | 9625   |
| 209459_s_at         | 4-aminobutyrate aminotransferase                                               | ABAT              | 18     |
| 209460_at           | 4-aminobutyrate aminotransferase                                               | ABAT              | 18     |
| 203505_at           | ATP-binding cassette, sub-family A (ABC1), member 1                            | ABCA1             | 19     |
| 203504_s_at         | ATP-binding cassette, sub-family A (ABC1), member 1                            | ABCA1             | 19     |
| 220159_at           | ATP-binding cassette, sub-family A (ABC1), member 11 (pseudogene)              | ABCA11            | 79963  |
| 241705_at           | ATP-binding cassette, sub-family A (ABC1), member 5                            | ABCA5             | 23461  |
| 242541_at           | ATP-binding cassette, sub-family A (ABC1), member 9                            | ABCA9             | 10350  |
| 223320_at           | ATP-binding cassette, sub-family B (MDR/TAP), member 10                        | ABCB10            | 23456  |
| 1570505_at          | ATP-binding cassette, sub-family B (MDR/TAP), member 4                         | ABCB4             | 5244   |
| 215873_x_at         | ATP-binding cassette, sub-family C (CFTR/MRP), member 10                       | ABCC10            | 89845  |
| 1552582_at          | ATP-binding cassette, sub-family C (CFTR/MRP), member 13                       | ABCC13            | 150000 |
| 214979_at           | ATP-binding cassette, sub-family C (CFTR/MRP), member 3                        | ABCC3             | 8714   |
| 1555039_a_at        | ATP-binding cassette, sub-family C (CFTR/MRP), member 4                        | ABCC4             | 10257  |
| 226363_at           | ATP-binding cassette, sub-family C (CFTR/MRP), member 5                        | ABCC5             | 10057  |
| 1558460_at          | ATP-binding cassette, sub-family C (CFTR/MRP), member 5                        | ABCC5             | 10057  |
| 209380_s_at         | ATP-binding cassette, sub-family C (CFTR/MRP), member 5                        | ABCC5             | 10057  |
| 1557374_at          | ATP-binding cassette, sub-family C (CFTR/MRP), member 9                        | ABCC9             | 10060  |
| 1554878_a_at        | ATP-binding cassette, sub-family D (ALD), member 3                             | ABCD3             | 5825   |
| 202850_at           | ATP-binding cassette, sub-family D (ALD), member 3                             | ABCD3             | 5825   |
| 201872_s_at         | ATP-binding cassette, sub-family E (OABP), member 1 /// similar to ATP-binding | ABCE1 /// LOC6471 | 6059   |
| 201873_s_at         | ATP-binding cassette, sub-family E (OABP), member 1 /// similar to ATP-binding | ABCE1 /// LOC6471 | 6059   |
| 200045_at           | ATP-binding cassette, sub-family F (GCN20), member 1                           | ABCF1             | 23     |
| 204567_s_at         | ATP-binding cassette, sub-family G (WHITE), member 1                           | ABCG1             | 9619   |
| 209735_at           | ATP-binding cassette, sub-family G (WHITE), member 2                           | ABCG2             | 9429   |
| 222697_s_at         | abhydrolase domain containing 10                                               | ABHD10            | 55347  |
| 218633_x_at         | abhydrolase domain containing 10                                               | ABHD10            | 55347  |
| 228123_s_at         | abhydrolase domain containing 12                                               | ABHD12            | 26090  |
| 234993_at           | abhydrolase domain containing 13                                               | ABHD13            | 84945  |
| 235348_at           | abhydrolase domain containing 13                                               | ABHD13            | 84945  |
| 63825_at            | abhydrolase domain containing 2                                                | ABHD2             | 11057  |
| 225337_at           | abhydrolase domain containing 2                                                | ABHD2             | 11057  |
| 221815_at           | abhydrolase domain containing 2                                                | ABHD2             | 11057  |
| 87100_at            | abhydrolase domain containing 2                                                | ABHD2             | 11057  |
| 213805_at           | abhydrolase domain containing 5                                                | ABHD5             | 51099  |
| 218739_at           | abhydrolase domain containing 5                                                | ABHD5             | 51099  |
| 225098_at           | abl interactor 2                                                               | ABI2              | 10152  |
| 202123_s_at         | v-abl Abelson murine leukemia viral oncogene homolog 1                         | ABL1              | 25     |
| 231907_at           | v-abl Abelson murine leukemia viral oncogene homolog 2 (arg, Abelson-related)  | ABL2              | 27     |
| 200965_s_at         | actin binding LIM protein 1                                                    | ABLIM1            | 3983   |
| 1552732_at          | actin-binding Rho activating protein                                           | ABRA              | 137735 |
| 218405_at           | activator of basal transcription 1                                             | ABT1              | 29777  |
| 229164_s_at         | ankyrin repeat and BTB (POZ) domain containing 1                               | ABTB1             | 80325  |
| 226442_at           | ankyrin repeat and BTB (POZ) domain containing 1                               | ABTB1             | 80325  |
| 228848_at           | ankyrin repeat and BTB (POZ) domain containing 1                               | ABTB1             | 80325  |
| 43427_at            | acetyl-Coenzyme A carboxylase beta                                             | ACACB             | 32     |
| 221669_s_at         | acyl-Coenzyme A dehydrogenase family, member 8                                 | ACAD8             | 27034  |
| 202502_at           | acyl-Coenzyme A dehydrogenase, C-4 to C-12 straight chain                      | ACADM             | 34     |
| 226030_at           | acyl-Coenzyme A dehydrogenase, short/branched chain                            | ACADSB            | 36     |
| 207692_s_at         | aggrecan                                                                       | ACAN              | 176    |
| 209608_s_at         | acetyl-Coenzyme A acetyltransferase 2 (acetoacetyl Coenzyme A thiolase)        | ACAT2             | 39     |
| 202324_s_at         | acyl-Coenzyme A binding domain containing 3                                    | ACBD3             | 64746  |
| 202323_s_at         | acyl-Coenzyme A binding domain containing 3                                    | ACBD3             | 64746  |
| 225663_at           | acyl-Coenzyme A binding domain containing 5                                    | ACBD5             | 91452  |
| 1568877_a_at        | acyl-Coenzyme A binding domain containing 5                                    | ACBD5             | 91452  |

|              |                                                                              |                               |              |
|--------------|------------------------------------------------------------------------------|-------------------------------|--------------|
| 1564504_at   | amiloride-sensitive cation channel 5, intestinal                             | <i>ACCN5</i>                  | 51802        |
| 204617_s_at  | adrenocortical dysplasia homolog (mouse)                                     | <i>ACD</i>                    | 65057        |
| 207071_s_at  | aconitase 1, soluble                                                         | <i>ACO1</i>                   | 48           |
| 216103_at    | acyl-CoA thioesterase 11                                                     | <i>ACOT11</i>                 | 26027        |
| 208002_s_at  | acyl-CoA thioesterase 7                                                      | <i>ACOT7</i>                  | 11332        |
| 236514_at    | Acyl-CoA thioesterase 8                                                      | <i>ACOT8</i>                  | 10005        |
| 204212_at    | acyl-CoA thioesterase 8                                                      | <i>ACOT8</i>                  | 10005        |
| 227962_at    | acyl-Coenzyme A oxidase 1, palmitoyl                                         | <i>ACOX1</i>                  | 51           |
| 202767_at    | acid phosphatase 2, lysosomal                                                | <i>ACP2</i>                   | 53           |
| 218795_at    | acid phosphatase 6, lysophosphatidic                                         | <i>ACP6</i>                   | 51205        |
| 242270_at    | Acid phosphatase 6, lysophosphatidic                                         | <i>ACP6</i>                   | ---          |
| 226925_at    | acid phosphatase-like 2                                                      | <i>ACPL2</i>                  | 92370        |
| 204393_s_at  | acid phosphatase, prostate                                                   | <i>ACPP</i>                   | 55           |
| 241715_x_at  | acid phosphatase, testicular                                                 | <i>ACPT</i>                   | 93650        |
| 207969_x_at  | acrosomal vesicle protein 1                                                  | <i>ACRV1</i>                  | 56           |
| 207973_x_at  | acrosomal vesicle protein 1                                                  | <i>ACRV1</i>                  | 56           |
| 201963_at    | acyl-CoA synthetase long-chain family member 1                               | <i>ACSL1</i>                  | 2180         |
| 207275_s_at  | acyl-CoA synthetase long-chain family member 1                               | <i>ACSL1</i>                  | 2180         |
| 201660_at    | Full-length cDNA clone CS0DF008YJ12 of Fetal brain of Homo sapiens (human) / | <i>ACSL3</i>                  | 2181         |
| 201661_s_at  | acyl-CoA synthetase long-chain family member 3                               | <i>ACSL3</i>                  | 2181         |
| 222592_s_at  | acyl-CoA synthetase long-chain family member 5                               | <i>ACSL5</i>                  | 51703        |
| 202666_s_at  | actin-like 6A                                                                | <i>ACTL6A</i>                 | 86           |
| 203864_s_at  | actinin, alpha 2                                                             | <i>ACTN2</i>                  | 88           |
| 200601_at    | actinin, alpha 4                                                             | <i>ACTN4</i>                  | 81           |
| 222230_s_at  | actin-related protein 10 homolog ( <i>S. cerevisiae</i> )                    | <i>ACTR10</i>                 | 55860        |
| 1554390_s_at | ARP2 actin-related protein 2 homolog (yeast)                                 | <i>ACTR2</i>                  | 10097        |
| 218395_at    | ARP6 actin-related protein 6 homolog (yeast)                                 | <i>ACTR6</i>                  | 64431        |
| 213198_at    | activin A receptor, type IB                                                  | <i>ACVR1B</i>                 | 91           |
| 1552519_at   | activin A receptor, type IC                                                  | <i>ACVR1C</i>                 | 130399       |
| 205327_s_at  | activin A receptor, type IIA                                                 | <i>ACVR2A</i>                 | 92           |
| 228416_at    | activin A receptor, type IIA                                                 | <i>ACVR2A</i>                 | 92           |
| 225421_at    | aminoacylase 1-like 2                                                        | <i>ACY1L2</i>                 | 135293       |
| 231448_at    | adenosine deaminase domain containing 1 (testis-specific)                    | <i>ADAD1</i>                  | 132612       |
| 205745_x_at  | ADAM metallopeptidase domain 17 (tumor necrosis factor, alpha, converting er | <i>ADAM17</i>                 | 6868         |
| 205746_s_at  | ADAM metallopeptidase domain 17 (tumor necrosis factor, alpha, converting er | <i>ADAM17</i>                 | 6868         |
| 1568970_at   | ADAM metallopeptidase domain 18                                              | <i>ADAM18</i>                 | 8749         |
| 221128_at    | ADAM metallopeptidase domain 19 (meltrin beta)                               | <i>ADAM19</i>                 | 8728         |
| 209765_at    | ADAM metallopeptidase domain 19 (meltrin beta)                               | <i>ADAM19</i>                 | 8728         |
| 207665_at    | ADAM metallopeptidase domain 21 /// ADAM metallopeptidase domain 21 pse      | <i>ADAM21</i> /// <i>ADAM</i> | 145241 /// { |
| 1555024_at   | ADAM metallopeptidase domain 22                                              | <i>ADAM22</i>                 | 53616        |
| 208268_at    | ADAM metallopeptidase domain 28                                              | <i>ADAM28</i>                 | 10863        |
| 202381_at    | ADAM metallopeptidase domain 9 (meltrin gamma)                               | <i>ADAM9</i>                  | 8754         |
| 1555326_a_at | ADAM metallopeptidase domain 9 (meltrin gamma)                               | <i>ADAM9</i>                  | 8754         |
| 1570042_a_at | ADAM metallopeptidase domain 9 (meltrin gamma)                               | <i>ADAM9</i>                  | 8754         |
| 206134_at    | ADAM-like, decysin 1                                                         | <i>ADAMDEC1</i>               | 27299        |
| 230040_at    | ADAM metallopeptidase with thrombospondin type 1 motif, 18                   | <i>ADAMTS18</i>               | 170692       |
| 220717_at    | ADAM metallopeptidase with thrombospondin type 1 motif, 20                   | <i>ADAMTS20</i>               | 80070        |
| 214913_at    | ADAM metallopeptidase with thrombospondin type 1 motif, 3                    | <i>ADAMTS3</i>                | 9508         |
| 219935_at    | ADAM metallopeptidase with thrombospondin type 1 motif, 5 (aggrecanase-2)    | <i>ADAMTS5</i>                | 11096        |
| 235368_at    | ADAM metallopeptidase with thrombospondin type 1 motif, 5 (aggrecanase-2)    | <i>ADAMTS5</i>                | 11096        |
| 229357_at    | ADAM metallopeptidase with thrombospondin type 1 motif, 5 (aggrecanase-2)    | <i>ADAMTS5</i>                | 11096        |
| 1570351_at   | ADAM metallopeptidase with thrombospondin type 1 motif, 6                    | <i>ADAMTS6</i>                | 11174        |
| 220287_at    | ADAM metallopeptidase with thrombospondin type 1 motif, 9                    | <i>ADAMTS9</i>                | 56999        |
| 233785_at    | ADAM metallopeptidase with thrombospondin type 1 motif, 9                    | <i>ADAMTS9</i>                | 56999        |
| 213974_at    | ADAMTS-like 3                                                                | <i>ADAMTSL3</i>               | 57188        |
| 236817_at    | adenosine deaminase, tRNA-specific 2, TAD2 homolog ( <i>S. cerevisiae</i> )  | <i>ADAT2</i>                  | 134637       |
| 226690_at    | Adenylate cyclase activating polypeptide 1 (pituitary) receptor type I       | <i>ADCYAP1R1</i>              | 117          |
| 209122_at    | adipose differentiation-related protein                                      | <i>ADFP</i>                   | 123          |
| 223781_x_at  | alcohol dehydrogenase 4 (class II), pi polypeptide                           | <i>ADH4</i>                   | 127          |
| 208848_at    | alcohol dehydrogenase 5 (class III), chi polypeptide                         | <i>ADH5</i>                   | 128          |
| 208847_s_at  | alcohol dehydrogenase 5 (class III), chi polypeptide                         | <i>ADH5</i>                   | 128          |
| 217761_at    | acireductone dioxygenase 1                                                   | <i>ADI1</i>                   | 55256        |
| 222400_s_at  | acireductone dioxygenase 1                                                   | <i>ADI1</i>                   | 55256        |

|              |                                                                                     |                           |              |
|--------------|-------------------------------------------------------------------------------------|---------------------------|--------------|
| 217748_at    | adiponectin receptor 1                                                              | <i>ADIPOR1</i>            | 51094        |
| 201346_at    | adiponectin receptor 2                                                              | <i>ADIPOR2</i>            | 79602        |
| 204120_s_at  | adenosine kinase                                                                    | <i>ADK</i>                | 132          |
| 204119_s_at  | adenosine kinase                                                                    | <i>ADK</i>                | 132          |
| 202912_at    | adrenomedullin                                                                      | <i>ADM</i>                | 133          |
| 226426_at    | activity-dependent neuroprotector homeobox                                          | <i>ADNP</i>               | 23394        |
| 205013_s_at  | adenosine A2a receptor                                                              | <i>ADORA2A</i>            | 135          |
| 205891_at    | adenosine A2b receptor                                                              | <i>ADORA2B</i>            | 136          |
| 206171_at    | adenosine A3 receptor                                                               | <i>ADORA3</i>             | 140          |
| 224455_s_at  | ADP-dependent glucokinase                                                           | <i>ADPGK</i>              | 83440        |
| 223097_at    | ADP-ribosylhydrolase like 2                                                         | <i>ADPRHL2</i>            | 54936        |
| 206170_at    | adrenergic, beta-2-, receptor, surface                                              | <i>ADRB2</i>              | 154          |
| 204183_s_at  | adrenergic, beta, receptor kinase 2                                                 | <i>ADRBK2</i>             | 157          |
| 201281_at    | adhesion regulating molecule 1                                                      | <i>ADRM1</i>              | 11047        |
| 202144_s_at  | adenylosuccinate lyase                                                              | <i>ADSL</i>               | 158          |
| 221761_at    | adenylosuccinate synthase                                                           | <i>ADSS</i>               | 159          |
| 235184_at    | AE binding protein 2                                                                | <i>AEBP2</i>              | 121536       |
| 225889_at    | AE binding protein 2                                                                | <i>AEBP2</i>              | 121536       |
| 201924_at    | AF4/FMR2 family, member 1                                                           | <i>AFF1</i>               | 4299         |
| 225229_at    | AF4/FMR2 family, member 4                                                           | <i>AFF4</i>               | 27125        |
| 232864_s_at  | AF4/FMR2 family, member 4                                                           | <i>AFF4</i>               | 27125        |
| 1555436_a_at | AF4/FMR2 family, member 4                                                           | <i>AFF4</i>               | 27125        |
| 1557820_at   | AFG3 ATPase family gene 3-like 2 (yeast)                                            | <i>AFG3L2</i>             | 10939        |
| 222472_at    | aftiphilin                                                                          | <i>AFTPH</i>              | 54812        |
| 204332_s_at  | aspartylglucosaminidase                                                             | <i>AGA</i>                | 175          |
| 204333_s_at  | aspartylglucosaminidase                                                             | <i>AGA</i>                | 175          |
| 1553447_at   | ATP/GTP binding protein-like 1                                                      | <i>AGBL1</i>              | 123624       |
| 208042_at    | angiogenic factor with G patch and FHA domains 1                                    | <i>AGGF1</i>              | 55109        |
| 203566_s_at  | amylo-1, 6-glucosidase, 4-alpha-glucanotransferase (glycogen debranching enzy       | <i>AGL</i>                | 178          |
| 219792_at    | agmatine ureohydrolase (agmatinase)                                                 | <i>AGMAT</i>              | 79814        |
| 223184_s_at  | 1-acylglycerol-3-phosphate O-acyltransferase 3                                      | <i>AGPAT3</i>             | 56894        |
| 232007_at    | 1-acylglycerol-3-phosphate O-acyltransferase 5 (lysophosphatidic acid acyltransf    | <i>AGPAT5</i>             | 55326        |
| 224776_at    | 1-acylglycerol-3-phosphate O-acyltransferase 6 (lysophosphatidic acid acyltransf    | <i>AGPAT6</i>             | 137964       |
| 225114_at    | alkylglycerone phosphate synthase                                                   | <i>AGPS</i>               | 8540         |
| 225113_at    | Alkylglycerone phosphate synthase                                                   | <i>AGPS</i>               | 8540         |
| 204500_s_at  | ATP/GTP binding protein 1                                                           | <i>AGTPBP1</i>            | 23287        |
| 205357_s_at  | angiotensin II receptor, type 1                                                     | <i>AGTR1</i>              | 185          |
| 225059_at    | angiotensin II receptor-associated protein                                          | <i>AGTRAP</i>             | 57085        |
| 1555736_a_at | angiotensin II receptor-associated protein                                          | <i>AGTRAP</i>             | 57085        |
| 226519_s_at  | alanine-glyoxylate aminotransferase 2-like 2                                        | <i>AGXT2L2</i>            | 85007        |
| 232488_at    | alanine-glyoxylate aminotransferase 2-like 2                                        | <i>AGXT2L2</i>            | 85007        |
| 214766_s_at  | AT hook containing transcription factor 1                                           | <i>AHCTF1</i>             | 25909        |
| 200903_s_at  | S-adenosylhomocysteine hydrolase                                                    | <i>AHCY</i>               | 191          |
| 200850_s_at  | S-adenosylhomocysteine hydrolase-like 1                                             | <i>AHCYL1</i>             | 10768        |
| 221569_at    | Abelson helper integration site 1                                                   | <i>AHI1</i>               | 54806        |
| 229354_at    | aryl-hydrocarbon receptor repressor                                                 | <i>AHRR</i>               | 10016 /// 5; |
| 206513_at    | absent in melanoma 2                                                                | <i>AIM2</i>               | 9447         |
| 219977_at    | aryl hydrocarbon receptor interacting protein-like 1                                | <i>AIPL1</i>              | 23746        |
| 212175_s_at  | adenylate kinase 2                                                                  | <i>AK2</i>                | 204          |
| 208967_s_at  | adenylate kinase 2                                                                  | <i>AK2</i>                | 204          |
| 224655_at    | adenylate kinase 3                                                                  | <i>AK3</i>                | 50808        |
| 224151_s_at  | adenylate kinase 3                                                                  | <i>AK3</i>                | 50808        |
| 204348_s_at  | adenylate kinase 3-like 1 /// adenylate kinase 3-like 2 /// similar to Adenylate ki | <i>AK3L1 /// AK3L2 //</i> | 205 /// 6456 |
| 204347_at    | adenylate kinase 3-like 2                                                           | <i>AK3L2</i>              | 205 /// 6456 |
| 225342_at    | adenylate kinase 3-like 2                                                           | <i>AK3L2</i>              | 205 /// 6456 |
| 205045_at    | A kinase (PRKA) anchor protein 10                                                   | <i>AKAP10</i>             | 11216        |
| 236007_at    | A kinase (PRKA) anchor protein 10                                                   | <i>AKAP10</i>             | 11216        |
| 236006_s_at  | A kinase (PRKA) anchor protein 10                                                   | <i>AKAP10</i>             | 11216        |
| 203156_at    | A kinase (PRKA) anchor protein 11                                                   | <i>AKAP11</i>             | 11215        |
| 215336_at    | A kinase (PRKA) anchor protein 11                                                   | <i>AKAP11</i>             | 11215        |
| 209534_x_at  | A kinase (PRKA) anchor protein 13                                                   | <i>AKAP13</i>             | 11214        |
| 222024_s_at  | A kinase (PRKA) anchor protein 13                                                   | <i>AKAP13</i>             | 11214        |
| 205359_at    | A kinase (PRKA) anchor protein 6                                                    | <i>AKAP6</i>              | 9472         |



|              |                                                                                  |                                |              |
|--------------|----------------------------------------------------------------------------------|--------------------------------|--------------|
| 224900_at    | ankyrin repeat and FYVE domain containing 1                                      | ANKFY1                         | 51479        |
| 219081_at    | ankyrin repeat and KH domain containing 1                                        | ANKHD1                         | 54882 /// 86 |
| 233292_s_at  | ankyrin repeat and KH domain containing 1 /// MASK-4E-BP3 alternate reading      | ANKHD1 /// MASK-404734 /// 86  |              |
| 208772_at    | ankyrin repeat and KH domain containing 1 /// MASK-4E-BP3 alternate reading      | ANKHD1 /// MASK-404734 /// 86  |              |
| 208773_s_at  | ankyrin repeat and KH domain containing 1 /// MASK-4E-BP3 alternate reading      | ANKHD1 /// MASK-404734 /// 86  |              |
| 224687_at    | ankyrin repeat and IBR domain containing 1                                       | ANKIB1                         | 54467        |
| 224682_at    | ankyrin repeat and IBR domain containing 1                                       | ANKIB1                         | 54467        |
| 239116_at    | Ankyrin repeat domain 10                                                         | ANKRD10                        | 55608        |
| 228356_at    | ankyrin repeat domain 11                                                         | ANKRD11                        | 29123        |
| 238538_at    | ankyrin repeat domain 11                                                         | ANKRD11                        | 29123        |
| 216563_at    | Ankyrin repeat domain 12                                                         | ANKRD12                        | 23253        |
| 212289_at    | ankyrin repeat domain 12                                                         | ANKRD12                        | 23253        |
| 216550_x_at  | ankyrin repeat domain 12                                                         | ANKRD12                        | 23253        |
| 212286_at    | ankyrin repeat domain 12                                                         | ANKRD12                        | 23253        |
| 227375_at    | ankyrin repeat domain 13C                                                        | ANKRD13C                       | 81573        |
| 223418_x_at  | ankyrin repeat domain 13C                                                        | ANKRD13C                       | 81573        |
| 1554471_a_at | ankyrin repeat domain 13C                                                        | ANKRD13C                       | 81573        |
| 238597_at    | Ankyrin repeat domain 13C                                                        | ANKRD13C                       | 81573        |
| 38447_at     | ankyrin repeat domain 13 family, member D                                        | ANKRD13D                       | 156          |
| 225852_at    | ankyrin repeat domain 17                                                         | ANKRD17                        | 26057        |
| 1559406_at   | ankyrin repeat domain 18A                                                        | ANKRD18A                       | 253650       |
| 1570255_s_at | ankyrin repeat domain 20 family, member A1 /// ankyrin repeat domain 20 fam      | ANKRD20A1 /// AN 375010 /// 86 |              |
| 224012_at    | ankyrin repeat domain 20 family, member A1 /// ankyrin repeat domain 20 fam      | ANKRD20A1 /// AN 441425 /// 86 |              |
| 205705_at    | ankyrin repeat domain 26                                                         | ANKRD26                        | 22852        |
| 1561079_at   | ankyrin repeat domain 28                                                         | ANKRD28                        | 23243        |
| 226025_at    | ankyrin repeat domain 28                                                         | ANKRD28                        | 23243        |
| 223864_at    | ankyrin repeat domain 30A                                                        | ANKRD30A                       | 91074        |
| 223542_at    | ankyrin repeat domain 32                                                         | ANKRD32                        | 84250        |
| 242209_at    | ankyrin repeat domain 33                                                         | ANKRD33                        | 341405       |
| 227337_at    | ankyrin repeat domain 37                                                         | ANKRD37                        | 353322       |
| 223532_at    | ankyrin repeat domain 39                                                         | ANKRD39                        | 51239        |
| 235777_at    | ankyrin repeat domain 44                                                         | ANKRD44                        | 91526        |
| 235778_s_at  | ankyrin repeat domain 44                                                         | ANKRD44                        | 91526        |
| 212731_at    | ankyrin repeat domain 46                                                         | ANKRD46                        | 157567       |
| 225731_at    | ankyrin repeat domain 50                                                         | ANKRD50                        | 57182        |
| 220112_at    | ankyrin repeat domain 55                                                         | ANKRD55                        | 79722        |
| 204672_s_at  | ankyrin repeat domain 6                                                          | ANKRD6                         | 22881        |
| 230972_at    | ankyrin repeat domain 9                                                          | ANKRD9                         | 122416       |
| 218274_s_at  | ankyrin repeat and zinc finger domain containing 1                               | ANKZF1                         | 55139        |
| 222608_s_at  | anillin, actin binding protein                                                   | ANLN                           | 54443        |
| 221505_at    | acidic (leucine-rich) nuclear phosphoprotein 32 family, member E                 | ANP32E                         | 81611        |
| 208103_s_at  | acidic (leucine-rich) nuclear phosphoprotein 32 family, member E                 | ANP32E                         | 81611        |
| 227660_at    | anthrax toxin receptor 1                                                         | ANTXR1                         | 84168        |
| 225524_at    | anthrax toxin receptor 2                                                         | ANTXR2                         | 118429       |
| 201012_at    | annexin A1                                                                       | ANXA1                          | 301          |
| 206200_s_at  | annexin A11                                                                      | ANXA11                         | 311          |
| 228727_at    | annexin A11                                                                      | ANXA11                         | 311          |
| 209369_at    | annexin A3                                                                       | ANXA3                          | 306          |
| 201302_at    | annexin A4                                                                       | ANXA4                          | 307          |
| 200782_at    | annexin A5                                                                       | ANXA5                          | 308          |
| 209860_s_at  | annexin A7                                                                       | ANXA7                          | 310          |
| 205639_at    | acyloxyacyl hydrolase (neutrophil)                                               | AOAH                           | 313          |
| 207064_s_at  | amine oxidase, copper containing 2 (retina-specific)                             | AOC2                           | 314          |
| 204894_s_at  | amine oxidase, copper containing 3 (vascular adhesion protein 1)                 | AOC3                           | 8639         |
| 203350_at    | adaptor-related protein complex 1, gamma 1 subunit                               | AP1G1                          | 164          |
| 1553165_at   | AP1 gamma subunit binding protein 1                                              | AP1GBP1                        | 11276        |
| 223025_s_at  | adaptor-related protein complex 1, mu 1 subunit                                  | AP1M1                          | 8907         |
| 223024_at    | adaptor-related protein complex 1, mu 1 subunit                                  | AP1M1                          | 8907         |
| 230413_s_at  | Adaptor-related protein complex 1, sigma 2 subunit                               | AP1S2                          | ---          |
| 203300_x_at  | adaptor-related protein complex 1, sigma 2 subunit                               | AP1S2                          | 8905         |
| 230264_s_at  | adaptor-related protein complex 1, sigma 2 subunit                               | AP1S2                          | 8905         |
| 203299_s_at  | adaptor-related protein complex 1, sigma 2 subunit /// similar to adaptor-relate | AP1S2 /// LOC6536              | 8905         |
| 1555731_a_at | adaptor-related protein complex 1, sigma 3 subunit                               | AP1S3                          | 130340       |

|              |                                                                                 |                    |              |
|--------------|---------------------------------------------------------------------------------|--------------------|--------------|
| 1555733_s_at | adaptor-related protein complex 1, sigma 3 subunit                              | AP1S3              | 130340       |
| 234068_s_at  | adaptor-related protein complex 2, alpha 1 subunit                              | AP2A1              | 160          |
| 212159_x_at  | adaptor-related protein complex 2, alpha 2 subunit                              | AP2A2              | 161          |
| 203141_s_at  | adaptor-related protein complex 3, beta 1 subunit                               | AP3B1              | 8546         |
| 206592_s_at  | adaptor-related protein complex 3, delta 1 subunit                              | AP3D1              | 8943         |
| 208710_s_at  | adaptor-related protein complex 3, delta 1 subunit                              | AP3D1              | 8943         |
| 222516_at    | adaptor-related protein complex 3, mu 1 subunit                                 | AP3M1              | 26985        |
| 1569053_at   | adaptor-related protein complex 3, mu 2 subunit                                 | AP3M2              | 10947        |
| 202442_at    | adaptor-related protein complex 3, sigma 1 subunit                              | AP3S1              | 1176         |
| 202398_at    | adaptor-related protein complex 3, sigma 2 subunit                              | AP3S2              | 10239        |
| 202399_s_at  | adaptor-related protein complex 3, sigma 2 subunit /// chromosome 15 open re    | AP3S2 /// C15orf38 | 10239        |
| 231714_s_at  | adaptor-related protein complex 4, beta 1 subunit                               | AP4B1              | 10717        |
| 228164_at    | adaptor-related protein complex 4, epsilon 1 subunit                            | AP4E1              | 23431        |
| 215148_s_at  | amyloid beta (A4) precursor protein-binding, family A, member 3 (X11-like 2)    | APBA3              | 9546         |
| 205146_x_at  | amyloid beta (A4) precursor protein-binding, family A, member 3 (X11-like 2)    | APBA3              | 9546         |
| 1554571_at   | amyloid beta (A4) precursor protein-binding, family B, member 1 interacting pro | APBB1IP            | 54518        |
| 40148_at     | amyloid beta (A4) precursor protein-binding, family B, member 2 (Fe65-like)     | APBB2              | 323          |
| 201284_s_at  | N-acylaminoacyl-peptide hydrolase                                               | APEH               | 327          |
| 214960_at    | apoptosis inhibitor 5                                                           | API5               | 8539         |
| 201687_s_at  | apoptosis inhibitor 5                                                           | API5               | 8539         |
| 201686_x_at  | apoptosis inhibitor 5                                                           | API5               | 8539         |
| 214959_s_at  | apoptosis inhibitor 5                                                           | API5               | 8539         |
| 218698_at    | APAF1 interacting protein                                                       | APIP               | 51074        |
| 214875_x_at  | amyloid beta (A4) precursor-like protein 2                                      | APLP2              | 334          |
| 208702_x_at  | amyloid beta (A4) precursor-like protein 2                                      | APLP2              | 334          |
| 211404_s_at  | amyloid beta (A4) precursor-like protein 2                                      | APLP2              | 334          |
| 208703_s_at  | amyloid beta (A4) precursor-like protein 2                                      | APLP2              | 334          |
| 208248_x_at  | amyloid beta (A4) precursor-like protein 2                                      | APLP2              | 334          |
| 208704_x_at  | amyloid beta (A4) precursor-like protein 2                                      | APLP2              | 334          |
| 220023_at    | apolipoprotein B48 receptor                                                     | APOB48R            | 55911        |
| 206160_at    | apolipoprotein B mRNA editing enzyme, catalytic polypeptide-like 2              | APOBEC2            | 10930        |
| 209584_x_at  | apolipoprotein B mRNA editing enzyme, catalytic polypeptide-like 3C             | APOBEC3C           | 27350        |
| 243912_x_at  | apolipoprotein B mRNA editing enzyme, catalytic polypeptide-like 3F             | APOBEC3F           | 200316 /// € |
| 214995_s_at  | apolipoprotein B mRNA editing enzyme, catalytic polypeptide-like 3G /// apolip  | APOBEC3F /// APO   | 200316 /// € |
| 204205_at    | apolipoprotein B mRNA editing enzyme, catalytic polypeptide-like 3G             | APOBEC3G           | 200316 /// € |
| 1554545_at   | apolipoprotein B mRNA editing enzyme, catalytic polypeptide-like 4 (putative)   | APOBEC4            | 403314       |
| 1557116_at   | apolipoprotein L, 6                                                             | APOL6              | 80830        |
| 1557236_at   | apolipoprotein L, 6                                                             | APOL6              | 80830        |
| 219716_at    | apolipoprotein L, 6                                                             | APOL6              | 80830        |
| 205682_x_at  | apolipoprotein M                                                                | APOM               | 55937        |
| 211277_x_at  | amyloid beta (A4) precursor protein (peptidase nexin-II, Alzheimer disease)     | APP                | 351          |
| 202268_s_at  | amyloid beta precursor protein binding protein 1                                | APPBP1             | 8883         |
| 202631_s_at  | amyloid beta precursor protein (cytoplasmic tail) binding protein 2             | APPBP2             | 10513        |
| 222538_s_at  | adaptor protein, phosphotyrosine interaction, PH domain and leucine zipper cor  | APPL1              | 26060        |
| 218527_at    | aprataxin                                                                       | APTX               | 54840        |
| 39248_at     | aquaporin 3 (Gill blood group)                                                  | AQP3               | 360          |
| 205568_at    | aquaporin 9                                                                     | AQP9               | 366          |
| 201176_s_at  | archain 1                                                                       | ARCN1              | 372          |
| 210603_at    | ARD1 homolog B (S. cerevisiae)                                                  | ARD1B              | 84779        |
| 232175_at    | ADP-ribosylation factor 1                                                       | ARF1               | 375          |
| 1565651_at   | ADP-ribosylation factor 1                                                       | ARF1               | 375          |
| 200065_s_at  | ADP-ribosylation factor 1                                                       | ARF1               | 375          |
| 208750_s_at  | ADP-ribosylation factor 1                                                       | ARF1               | 375          |
| 200734_s_at  | ADP-ribosylation factor 3                                                       | ARF3               | 377          |
| 211622_s_at  | ADP-ribosylation factor 3                                                       | ARF3               | 377          |
| 201097_s_at  | ADP-ribosylation factor 4                                                       | ARF4               | 378          |
| 201096_s_at  | ADP-ribosylation factor 4                                                       | ARF4               | 378          |
| 203311_s_at  | ADP-ribosylation factor 6                                                       | ARF6               | 382          |
| 234001_s_at  | ADP-ribosylation factor GTPase activating protein 1                             | ARFGAP1            | 55738        |
| 202211_at    | ADP-ribosylation factor GTPase activating protein 3                             | ARFGAP3            | 26286        |
| 218098_at    | ADP-ribosylation factor guanine nucleotide-exchange factor 2 (brefeldin A-inhib | ARFGEF2            | 10564        |
| 215931_s_at  | ADP-ribosylation factor guanine nucleotide-exchange factor 2 (brefeldin A-inhib | ARFGEF2            | 10564        |
| 214483_s_at  | ADP-ribosylation factor interacting protein 1 (arfaptin 1)                      | ARFIP1             | 27236        |

|              |                                                                                    |                                 |              |
|--------------|------------------------------------------------------------------------------------|---------------------------------|--------------|
| 218230_at    | ADP-ribosylation factor interacting protein 1 (arfaptin 1)                         | <i>ARFIP1</i>                   | 27236        |
| 202109_at    | ADP-ribosylation factor interacting protein 2 (arfaptin 2)                         | <i>ARFIP2</i>                   | 23647        |
| 206177_s_at  | arginase, liver                                                                    | <i>ARG1</i>                     | 383          |
| 216689_x_at  | Rho GTPase activating protein 1                                                    | <i>ARHGAP1</i>                  | 392          |
| 202117_at    | Rho GTPase activating protein 1                                                    | <i>ARHGAP1</i>                  | 392          |
| 207606_s_at  | Rho GTPase activating protein 12                                                   | <i>ARHGAP12</i>                 | 94134        |
| 218870_at    | Rho GTPase activating protein 15                                                   | <i>ARHGAP15</i>                 | 55843        |
| 225171_at    | Rho GTPase activating protein 18                                                   | <i>ARHGAP18</i>                 | 93663        |
| 225173_at    | Rho GTPase activating protein 18                                                   | <i>ARHGAP18</i>                 | 93663        |
| 212738_at    | Rho GTPase activating protein 19                                                   | <i>ARHGAP19</i>                 | 84986        |
| 37577_at     | Rho GTPase activating protein 19                                                   | <i>ARHGAP19</i>                 | 84986        |
| 38149_at     | Rho GTPase activating protein 25                                                   | <i>ARHGAP25</i>                 | 9938         |
| 204882_at    | Rho GTPase activating protein 25                                                   | <i>ARHGAP25</i>                 | 9938         |
| 226576_at    | Rho GTPase activating protein 26                                                   | <i>ARHGAP26</i>                 | 23092        |
| 205068_s_at  | Rho GTPase activating protein 26                                                   | <i>ARHGAP26</i>                 | 23092        |
| 215955_x_at  | Rho GTPase activating protein 26                                                   | <i>ARHGAP26</i>                 | 23092        |
| 225618_at    | Rho GTPase activating protein 27                                                   | <i>ARHGAP27</i>                 | 201176       |
| 227057_at    | Rho GTPase activating protein 27                                                   | <i>ARHGAP27</i>                 | 201176       |
| 235635_at    | Rho GTPase activating protein 5                                                    | <i>ARHGAP5</i>                  | 394          |
| 217936_at    | Rho GTPase activating protein 5                                                    | <i>ARHGAP5</i>                  | 394          |
| 233849_s_at  | Rho GTPase activating protein 5                                                    | <i>ARHGAP5</i>                  | 394          |
| 201167_x_at  | Rho GDP dissociation inhibitor (GDI) alpha                                         | <i>ARHGDI</i>                   | 396          |
| 211716_x_at  | Rho GDP dissociation inhibitor (GDI) alpha                                         | <i>ARHGDI</i>                   | 396          |
| 213606_s_at  | Rho GDP dissociation inhibitor (GDI) alpha                                         | <i>ARHGDI</i>                   | 396          |
| 201168_x_at  | Rho GDP dissociation inhibitor (GDI) alpha /// similar to Rho GDP dissociation in  | <i>ARHGDI</i> /// <i>LOC7.</i>  | 396          |
| 203055_s_at  | Rho guanine nucleotide exchange factor (GEF) 1                                     | <i>ARHGEF1</i>                  | 9138         |
| 218501_at    | Rho guanine nucleotide exchange factor (GEF) 3                                     | <i>ARHGEF3</i>                  | 50650        |
| 209539_at    | Rac/Cdc42 guanine nucleotide exchange factor (GEF) 6                               | <i>ARHGEF6</i>                  | 9459         |
| 1562271_x_at | Rho guanine nucleotide exchange factor (GEF) 7                                     | <i>ARHGEF7</i>                  | 8874         |
| 233339_s_at  | AT rich interactive domain 1B (SWI1-like)                                          | <i>ARID1B</i>                   | 57492        |
| 225184_at    | AT rich interactive domain 1B (SWI1-like) /// similar to AT rich interactive domai | <i>ARID1B</i> /// <i>LOC729</i> | 57492 /// 7: |
| 218964_at    | AT rich interactive domain 3B (BRIGHT-like)                                        | <i>ARID3B</i>                   | 10620        |
| 223111_x_at  | AT rich interactive domain 4B (RBP1-like)                                          | <i>ARID4B</i>                   | 51742        |
| 212614_at    | AT rich interactive domain 5B (MRF1-like)                                          | <i>ARID5B</i>                   | 84159        |
| 201879_at    | ariadne homolog, ubiquitin-conjugating enzyme E2 binding protein, 1 (Drosophi      | <i>ARIH1</i>                    | 25820        |
| 201881_s_at  | ariadne homolog, ubiquitin-conjugating enzyme E2 binding protein, 1 (Drosophi      | <i>ARIH1</i>                    | 25820        |
| 201880_at    | Ariadne homolog, ubiquitin-conjugating enzyme E2 binding protein, 1 (Drosophi      | <i>ARIH1</i>                    | 25820        |
| 201878_at    | ariadne homolog, ubiquitin-conjugating enzyme E2 binding protein, 1 (Drosophi      | <i>ARIH1</i>                    | 25820        |
| 232991_at    | ADP-ribosylation factor-like 17                                                    | <i>ARL17</i>                    | 641522       |
| 210718_s_at  | ADP-ribosylation factor-like 17 pseudogene 1                                       | <i>ARL17P1</i>                  | 51326        |
| 241910_x_at  | ADP-ribosylation factor-like 17 pseudogene 1                                       | <i>ARL17P1</i>                  | 51326        |
| 213433_at    | ADP-ribosylation factor-like 3                                                     | <i>ARL3</i>                     | 403          |
| 202641_at    | ADP-ribosylation factor-like 3                                                     | <i>ARL3</i>                     | 403          |
| 226617_at    | ADP-ribosylation factor-like 5A                                                    | <i>ARL5A</i>                    | 26225        |
| 218150_at    | ADP-ribosylation factor-like 5A                                                    | <i>ARL5A</i>                    | 26225        |
| 242727_at    | ADP-ribosylation factor-like 5B                                                    | <i>ARL5B</i>                    | 221079       |
| 226345_at    | ADP-ribosylation factor-like 5B                                                    | <i>ARL5B</i>                    | ---          |
| 211935_at    | ADP-ribosylation factor-like 6 interacting protein 1                               | <i>ARL6IP1</i>                  | 23204        |
| 222700_at    | ADP-ribosylation factor-like 6 interacting protein 2                               | <i>ARL6IP2</i>                  | 64225        |
| 225711_at    | ADP-ribosylation-like factor 6 interacting protein 6                               | <i>ARL6IP6</i>                  | 151188       |
| 225707_at    | ADP-ribosylation-like factor 6 interacting protein 6                               | <i>ARL6IP6</i>                  | 151188       |
| 225347_at    | ADP-ribosylation factor-like 8A                                                    | <i>ARL8A</i>                    | 127829       |
| 217852_s_at  | ADP-ribosylation factor-like 8B                                                    | <i>ARL8B</i>                    | 55207        |
| 222442_s_at  | ADP-ribosylation factor-like 8B                                                    | <i>ARL8B</i>                    | 55207        |
| 222550_at    | armadillo repeat containing 1                                                      | <i>ARMC1</i>                    | 55156        |
| 218185_s_at  | armadillo repeat containing 1                                                      | <i>ARMC1</i>                    | 55156        |
| 221077_at    | armadillo repeat containing 4                                                      | <i>ARMC4</i>                    | 55130        |
| 221758_at    | armadillo repeat containing 6                                                      | <i>ARMC6</i>                    | 93436        |
| 203487_s_at  | armadillo repeat containing 8                                                      | <i>ARMC8</i>                    | 25852        |
| 217858_s_at  | armadillo repeat containing, X-linked 3                                            | <i>ARMCX3</i>                   | 51566        |
| 202655_at    | arginine-rich, mutated in early stage tumors                                       | <i>ARMET</i>                    | 7873         |
| 218222_x_at  | aryl hydrocarbon receptor nuclear translocator                                     | <i>ARNT</i>                     | 405          |
| 210828_s_at  | aryl hydrocarbon receptor nuclear translocator                                     | <i>ARNT</i>                     | 405          |

|              |                                                                                                                                            |                |              |
|--------------|--------------------------------------------------------------------------------------------------------------------------------------------|----------------|--------------|
| 200950_at    | actin related protein 2/3 complex, subunit 1A, 41kDa                                                                                       | <i>ARPC1A</i>  | 10552        |
| 217818_s_at  | actin related protein 2/3 complex, subunit 4, 20kDa                                                                                        | <i>ARPC4</i>   | 10093 /// 26 |
| 211963_s_at  | actin related protein 2/3 complex, subunit 5, 16kDa                                                                                        | <i>ARPC5</i>   | 10092        |
| 1555797_a_at | actin related protein 2/3 complex, subunit 5, 16kDa                                                                                        | <i>ARPC5</i>   | 10092        |
| 221482_s_at  | cyclic AMP phosphoprotein, 19 kD                                                                                                           | <i>ARPP-19</i> | 10776        |
| 218832_x_at  | arrestin, beta 1                                                                                                                           | <i>ARRB1</i>   | 408          |
| 222912_at    | arrestin, beta 1                                                                                                                           | <i>ARRB1</i>   | 408          |
| 203388_at    | arrestin, beta 2                                                                                                                           | <i>ARRB2</i>   | 409          |
| 226055_at    | arrestin domain containing 2                                                                                                               | <i>ARRDC2</i>  | 27106        |
| 224797_at    | arrestin domain containing 3                                                                                                               | <i>ARRDC3</i>  | 57561        |
| 236541_at    | Arylsulfatase A                                                                                                                            | <i>ARSA</i>    | 410          |
| 1552632_a_at | arylsulfatase G                                                                                                                            | <i>ARSG</i>    | 22901        |
| 239147_at    | arylsulfatase family, member K                                                                                                             | <i>ARSK</i>    | 153642       |
| 207919_at    | ADP-ribosyltransferase 1                                                                                                                   | <i>ART1</i>    | 417          |
| 214034_at    | type 1 tumor necrosis factor receptor shedding aminopeptidase regulator                                                                    | <i>ARTS-1</i>  | 51752        |
| 209701_at    | type 1 tumor necrosis factor receptor shedding aminopeptidase regulator                                                                    | <i>ARTS-1</i>  | 51752        |
| 213702_x_at  | N-acylsphingosine amidohydrolase (acid ceramidase) 1                                                                                       | <i>ASAH1</i>   | 427          |
| 210980_s_at  | N-acylsphingosine amidohydrolase (acid ceramidase) 1                                                                                       | <i>ASAH1</i>   | 427          |
| 1555419_a_at | N-acylsphingosine amidohydrolase (acid ceramidase) 1                                                                                       | <i>ASAH1</i>   | 427          |
| 213902_at    | N-acylsphingosine amidohydrolase (acid ceramidase) 1                                                                                       | <i>ASAH1</i>   | 427          |
| 229793_at    | N-acylsphingosine amidohydrolase (non-lysosomal ceramidase) 2                                                                              | <i>ASAH2</i>   | 653308       |
| 227135_at    | N-acylsphingosine amidohydrolase (acid ceramidase)-like                                                                                    | <i>AS AHL</i>  | 27163        |
| 215178_x_at  | N-acylsphingosine amidohydrolase (acid ceramidase)-like                                                                                    | <i>AS AHL</i>  | 27163        |
| 214765_s_at  | N-acylsphingosine amidohydrolase (acid ceramidase)-like                                                                                    | <i>AS AHL</i>  | 27163        |
| 1553453_at   | ankyrin repeat and SOCS box-containing 14                                                                                                  | <i>ASB14</i>   | 142686       |
| 1554627_a_at | activating signal cointegrator 1 complex subunit 1                                                                                         | <i>ASCC1</i>   | 51008        |
| 219336_s_at  | activating signal cointegrator 1 complex subunit 1                                                                                         | <i>ASCC1</i>   | 51008        |
| 215684_s_at  | activating signal cointegrator 1 complex subunit 2                                                                                         | <i>ASCC2</i>   | 84164        |
| 201855_s_at  | ATM/ATR-Substrate Chk2-Interacting Zn2+-finger protein                                                                                     | <i>ASCIZ</i>   | 23300        |
| 203427_at    | ASF1 anti-silencing function 1 homolog A ( <i>S. cerevisiae</i> )                                                                          | <i>ASF1A</i>   | 25842        |
| 204608_at    | argininosuccinate lyase                                                                                                                    | <i>ASL</i>     | 435          |
| 232238_at    | asp (abnormal spindle) homolog, microcephaly associated ( <i>Drosophila</i> )                                                              | <i>ASPM</i>    | 259266       |
| 239002_at    | asp (abnormal spindle) homolog, microcephaly associated ( <i>Drosophila</i> )                                                              | <i>ASPM</i>    | 259266       |
| 218857_s_at  | asparaginase like 1                                                                                                                        | <i>ASRGL1</i>  | 80150        |
| 222764_at    | asparaginase like 1                                                                                                                        | <i>ASRGL1</i>  | 80150        |
| 1554816_at   | astrotactin 2                                                                                                                              | <i>ASTN2</i>   | 23245        |
| 240072_at    | Additional sex combs like 2 ( <i>Drosophila</i> )                                                                                          | <i>ASXL2</i>   | 55252        |
| 233536_at    | additional sex combs like 3 ( <i>Drosophila</i> )                                                                                          | <i>ASXL3</i>   | 80816        |
| 1569729_a_at | ankyrin repeat, SAM and basic leucine zipper domain containing 1                                                                           | <i>ASZ1</i>    | 136991       |
| 213387_at    | ATPase family, AAA domain containing 2B                                                                                                    | <i>ATAD2B</i>  | 54454        |
| 232908_at    | ATPase family, AAA domain containing 2B                                                                                                    | <i>ATAD2B</i>  | 54454        |
| 205446_s_at  | activating transcription factor 2                                                                                                          | <i>ATF2</i>    | 1386         |
| 212984_at    | activating transcription factor 2                                                                                                          | <i>ATF2</i>    | 1386         |
| 200779_at    | activating transcription factor 4 (tax-responsive enhancer element B67)                                                                    | <i>ATF4</i>    | 468          |
| 204998_s_at  | activating transcription factor 5                                                                                                          | <i>ATF5</i>    | 22809        |
| 218987_at    | activating transcription factor 7 interacting protein                                                                                      | <i>ATF7IP</i>  | 55729        |
| 231825_x_at  | activating transcription factor 7 interacting protein                                                                                      | <i>ATF7IP</i>  | 55729        |
| 213026_at    | ATG12 autophagy related 12 homolog ( <i>S. cerevisiae</i> )                                                                                | <i>ATG12</i>   | 9140         |
| 204833_at    | ATG12 autophagy related 12 homolog ( <i>S. cerevisiae</i> )                                                                                | <i>ATG12</i>   | 9140         |
| 220521_s_at  | ATG16 autophagy related 16-like 1 ( <i>S. cerevisiae</i> )                                                                                 | <i>ATG16L1</i> | 55054        |
| 213300_at    | ATG2 autophagy related 2 homolog A ( <i>S. cerevisiae</i> )                                                                                | <i>ATG2A</i>   | 23130        |
| 1559485_at   | ATG2 autophagy related 2 homolog B ( <i>S. cerevisiae</i> )                                                                                | <i>ATG2B</i>   | 55102        |
| 221492_s_at  | ATG3 autophagy related 3 homolog ( <i>S. cerevisiae</i> )                                                                                  | <i>ATG3</i>    | 64422        |
| 202512_s_at  | ATG5 autophagy related 5 homolog ( <i>S. cerevisiae</i> )                                                                                  | <i>ATG5</i>    | 9474         |
| 202511_s_at  | ATG5 autophagy related 5 homolog ( <i>S. cerevisiae</i> )                                                                                  | <i>ATG5</i>    | 9474         |
| 218673_s_at  | ATG7 autophagy related 7 homolog ( <i>S. cerevisiae</i> )                                                                                  | <i>ATG7</i>    | 10533        |
| 224025_s_at  | ATG7 autophagy related 7 homolog ( <i>S. cerevisiae</i> )                                                                                  | <i>ATG7</i>    | 10533        |
| 1569827_at   | ATG7 autophagy related 7 homolog ( <i>S. cerevisiae</i> )                                                                                  | <i>ATG7</i>    | 10533        |
| 202492_at    | ATG9 autophagy related 9 homolog A ( <i>S. cerevisiae</i> )                                                                                | <i>ATG9A</i>   | 79065        |
| 1554631_at   | ataxia telangiectasia mutated                                                                                                              | <i>ATM</i>     | 472          |
| 212672_at    | ataxia telangiectasia mutated                                                                                                              | <i>ATM</i>     | 472          |
| 210858_x_at  | ataxia telangiectasia mutated                                                                                                              | <i>ATM</i>     | 472          |
| 208442_s_at  | ataxia telangiectasia mutated /// similar to Serine-protein kinase ATM ( <i>Ataxia telangiectasia</i> ) <i>ATM</i> /// <i>LOC65161</i> 472 |                |              |



|              |                                                                                             |                 |           |
|--------------|---------------------------------------------------------------------------------------------|-----------------|-----------|
| 1558705_at   | atonal homolog 8 (Drosophila)                                                               | <i>ATOH8</i>    | 84913     |
| 213238_at    | ATPase, Class V, type 10D                                                                   | <i>ATP10D</i>   | 57205     |
| 215842_s_at  | ATPase, Class VI, type 11A                                                                  | <i>ATP11A</i>   | 23250     |
| 230875_s_at  | ATPase, Class VI, type 11A                                                                  | <i>ATP11A</i>   | 23250     |
| 238811_at    | ATPase, Class VI, type 11B                                                                  | <i>ATP11B</i>   | 23200     |
| 1564064_a_at | ATPase, Class VI, type 11B                                                                  | <i>ATP11B</i>   | 23200     |
| 1554557_at   | ATPase, Class VI, type 11B                                                                  | <i>ATP11B</i>   | 23200     |
| 1564063_a_at | ATPase, Class VI, type 11B                                                                  | <i>ATP11B</i>   | 23200     |
| 1554556_a_at | ATPase, Class VI, type 11B                                                                  | <i>ATP11B</i>   | 23200     |
| 219558_at    | ATPase type 13A3                                                                            | <i>ATP13A3</i>  | 79572     |
| 1553567_s_at | ATPase type 13A5                                                                            | <i>ATP13A5</i>  | 100133315 |
| 220948_s_at  | ATPase, Na <sup>+</sup> /K <sup>+</sup> transporting, alpha 1 polypeptide                   | <i>ATP1A1</i>   | 476       |
| 201242_s_at  | ATPase, Na <sup>+</sup> /K <sup>+</sup> transporting, beta 1 polypeptide                    | <i>ATP1B1</i>   | 481       |
| 208836_at    | ATPase, Na <sup>+</sup> /K <sup>+</sup> transporting, beta 3 polypeptide                    | <i>ATP1B3</i>   | 483       |
| 212361_s_at  | ATPase, Ca <sup>++</sup> transporting, cardiac muscle, slow twitch 2                        | <i>ATP2A2</i>   | 488       |
| 212930_at    | ATPase, Ca <sup>++</sup> transporting, plasma membrane 1                                    | <i>ATP2B1</i>   | 490       |
| 215716_s_at  | ATPase, Ca <sup>++</sup> transporting, plasma membrane 1                                    | <i>ATP2B1</i>   | 490       |
| 209281_s_at  | ATPase, Ca <sup>++</sup> transporting, plasma membrane 1                                    | <i>ATP2B1</i>   | 490       |
| 212135_s_at  | ATPase, Ca <sup>++</sup> transporting, plasma membrane 4                                    | <i>ATP2B4</i>   | 493       |
| 212136_at    | ATPase, Ca <sup>++</sup> transporting, plasma membrane 4                                    | <i>ATP2B4</i>   | 493       |
| 209935_at    | ATPase, Ca <sup>++</sup> transporting, type 2C, member 1                                    | <i>ATP2C1</i>   | 27032     |
| 206043_s_at  | ATPase, Ca <sup>++</sup> transporting, type 2C, member 2                                    | <i>ATP2C2</i>   | 9914      |
| 213738_s_at  | ATP synthase, H <sup>+</sup> transporting, mitochondrial F1 complex, alpha subunit 1, card  | <i>ATP5A1</i>   | 498       |
| 207508_at    | ATP synthase, H <sup>+</sup> transporting, mitochondrial F0 complex, subunit C3 (subunit 9) | <i>ATP5G3</i>   | 518       |
| 210149_s_at  | ATP synthase, H <sup>+</sup> transporting, mitochondrial F0 complex, subunit d              | <i>ATP5H</i>    | 10476     |
| 237400_at    | ATP synthase, H <sup>+</sup> transporting, mitochondrial F0 complex, subunit s (factor B)   | <i>ATP5S</i>    | ---       |
| 207809_s_at  | ATPase, H <sup>+</sup> transporting, lysosomal accessory protein 1                          | <i>ATP6AP1</i>  | 537       |
| 201443_s_at  | ATPase, H <sup>+</sup> transporting, lysosomal accessory protein 2                          | <i>ATP6AP2</i>  | 10159     |
| 205095_s_at  | ATPase, H <sup>+</sup> transporting, lysosomal V0 subunit a1                                | <i>ATP6V0A1</i> | 535       |
| 217603_at    | ATPase, H <sup>+</sup> transporting, lysosomal V0 subunit a2                                | <i>ATP6V0A2</i> | 23545     |
| 205704_s_at  | ATPase, H <sup>+</sup> transporting, lysosomal V0 subunit a2                                | <i>ATP6V0A2</i> | 23545     |
| 200078_s_at  | ATPase, H <sup>+</sup> transporting, lysosomal 21kDa, V0 subunit b                          | <i>ATP6V0B</i>  | 533       |
| 36994_at     | ATPase, H <sup>+</sup> transporting, lysosomal 16kDa, V0 subunit c                          | <i>ATP6V0C</i>  | 527       |
| 212041_at    | ATPase, H <sup>+</sup> transporting, lysosomal 38kDa, V0 subunit d1                         | <i>ATP6V0D1</i> | 9114      |
| 1553155_x_at | ATPase, H <sup>+</sup> transporting, lysosomal 38kDa, V0 subunit d2                         | <i>ATP6V0D2</i> | 245972    |
| 1553153_at   | ATPase, H <sup>+</sup> transporting, lysosomal 38kDa, V0 subunit d2                         | <i>ATP6V0D2</i> | 245972    |
| 214150_x_at  | ATPase, H <sup>+</sup> transporting, lysosomal 9kDa, V0 subunit e1                          | <i>ATP6V0E1</i> | 8992      |
| 201172_x_at  | ATPase, H <sup>+</sup> transporting, lysosomal 9kDa, V0 subunit e1                          | <i>ATP6V0E1</i> | 8992      |
| 200096_s_at  | ATPase, H <sup>+</sup> transporting, lysosomal 9kDa, V0 subunit e1                          | <i>ATP6V0E1</i> | 8992      |
| 213587_s_at  | ATPase, H <sup>+</sup> transporting V0 subunit e2                                           | <i>ATP6V0E2</i> | 155066    |
| 201971_s_at  | ATPase, H <sup>+</sup> transporting, lysosomal 70kDa, V1 subunit A                          | <i>ATP6V1A</i>  | 523       |
| 201089_at    | ATPase, H <sup>+</sup> transporting, lysosomal 56/58kDa, V1 subunit B2                      | <i>ATP6V1B2</i> | 526       |
| 226463_at    | ATPase, H <sup>+</sup> transporting, lysosomal 42kDa, V1 subunit C1                         | <i>ATP6V1C1</i> | 528       |
| 202873_at    | ATPase, H <sup>+</sup> transporting, lysosomal 42kDa, V1 subunit C1                         | <i>ATP6V1C1</i> | 528       |
| 202872_at    | ATPase, H <sup>+</sup> transporting, lysosomal 42kDa, V1 subunit C1                         | <i>ATP6V1C1</i> | 528       |
| 202874_s_at  | ATPase, H <sup>+</sup> transporting, lysosomal 42kDa, V1 subunit C1                         | <i>ATP6V1C1</i> | 528       |
| 208898_at    | ATPase, H <sup>+</sup> transporting, lysosomal 34kDa, V1 subunit D                          | <i>ATP6V1D</i>  | 51382     |
| 208899_x_at  | ATPase, H <sup>+</sup> transporting, lysosomal 34kDa, V1 subunit D                          | <i>ATP6V1D</i>  | 51382     |
| 208678_at    | ATPase, H <sup>+</sup> transporting, lysosomal 31kDa, V1 subunit E1                         | <i>ATP6V1E1</i> | 529       |
| 201527_at    | ATPase, H <sup>+</sup> transporting, lysosomal 14kDa, V1 subunit F                          | <i>ATP6V1F</i>  | 9296      |
| 208737_at    | ATPase, H <sup>+</sup> transporting, lysosomal 13kDa, V1 subunit G1                         | <i>ATP6V1G1</i> | 9550      |
| 1557586_s_at | ATPase, H <sup>+</sup> transporting, lysosomal 50/57kDa, V1 subunit H                       | <i>ATP6V1H</i>  | 51606     |
| 214594_x_at  | ATPase, Class I, type 8B, member 1                                                          | <i>ATP8B1</i>   | 5205      |
| 216873_s_at  | ATPase, Class I, type 8B, member 2                                                          | <i>ATP8B2</i>   | 57198     |
| 220416_at    | ATPase, Class I, type 8B, member 4                                                          | <i>ATP8B4</i>   | 79895     |
| 209903_s_at  | ataxia telangiectasia and Rad3 related                                                      | <i>ATR</i>      | 545       |
| 1569796_s_at | attractin-like 1                                                                            | <i>ATRNL1</i>   | 26033     |
| 203231_s_at  | ataxin 1                                                                                    | <i>ATXN1</i>    | 6310      |
| 203232_s_at  | ataxin 1                                                                                    | <i>ATXN1</i>    | 6310      |
| 208833_s_at  | ataxin 10                                                                                   | <i>ATXN10</i>   | 25814     |
| 208832_at    | ataxin 10                                                                                   | <i>ATXN10</i>   | 25814     |
| 226095_s_at  | ataxin 1-like                                                                               | <i>ATXN1L</i>   | 342371    |
| 207798_s_at  | ataxin 2-like                                                                               | <i>ATXN2L</i>   | 11273     |

|              |                                                                                    |                   |              |
|--------------|------------------------------------------------------------------------------------|-------------------|--------------|
| 205415_s_at  | ataxin 3                                                                           | ATXN3             | 4287         |
| 227732_at    | ataxin 7-like 1                                                                    | ATXN7L1           | 222255       |
| 224969_at    | ataxin 7-like 3                                                                    | ATXN7L3           | 56970        |
| 218580_x_at  | aurora kinase A interacting protein 1 /// similar to Cyclin-L2 (Paneth cell-enhanc | AURKAIP1 /// LOC7 | 54998        |
| 225552_x_at  | aurora kinase A interacting protein 1 /// similar to Cyclin-L2 (Paneth cell-enhanc | AURKAIP1 /// LOC7 | 54998        |
| 212599_at    | autism susceptibility candidate 2                                                  | AUTS2             | 26053        |
| 205539_at    | advillin                                                                           | AVIL              | 10677        |
| 1568706_s_at | Advillin                                                                           | AVIL              | 10677        |
| 225557_at    | AXIN1 up-regulated 1                                                               | AXUD1             | 64651        |
| 227889_at    | acyltransferase like 1                                                             | AYTL1             | 54947        |
| 201818_at    | acyltransferase like 2                                                             | AYTL2             | 79888        |
| 212461_at    | antizyme inhibitor 1                                                               | AZIN1             | 51582        |
| 201772_at    | antizyme inhibitor 1                                                               | AZIN1             | 51582        |
| 223374_s_at  | beta-1,3-N-acetylgalactosaminyltransferase 1 (globoside blood group)               | B3GALNT1          | 8706         |
| 226233_at    | beta-1,3-N-acetylgalactosaminyltransferase 2                                       | B3GALNT2          | 148789       |
| 222969_at    | UDP-Gal:betaGlcNAc beta 1,3-galactosyltransferase, polypeptide 1                   | B3GALT1           | 8708         |
| 1553959_a_at | UDP-Gal:betaGal beta 1,3-galactosyltransferase polypeptide 6                       | B3GALT6           | 126792       |
| 227083_at    | beta 1,3-galactosyltransferase-like                                                | B3GALT1           | 145173       |
| 227100_at    | beta 1,3-galactosyltransferase-like                                                | B3GALT1           | 145173       |
| 1554835_a_at | UDP-GlcNAc:betaGal beta-1,3-N-acetylglucosaminyltransferase 5                      | B3GNT5            | 84002        |
| 225612_s_at  | UDP-GlcNAc:betaGal beta-1,3-N-acetylglucosaminyltransferase 5                      | B3GNT5            | 84002        |
| 1556134_a_at | UDP-GlcNAc:betaGal beta-1,3-N-acetylglucosaminyltransferase 5                      | B3GNT5            | 84002        |
| 213589_s_at  | UDP-GlcNAc:betaGal beta-1,3-N-acetylglucosaminyltransferase-like 1                 | B3GNL1            | 146712       |
| 216627_s_at  | UDP-Gal:betaGlcNAc beta 1,4- galactosyltransferase, polypeptide 1                  | B4GALT1           | 2683         |
| 238987_at    | UDP-Gal:betaGlcNAc beta 1,4- galactosyltransferase, polypeptide 1                  | B4GALT1           | 2683         |
| 210540_s_at  | UDP-Gal:betaGlcNAc beta 1,4- galactosyltransferase, polypeptide 4                  | B4GALT4           | 8702         |
| 221484_at    | UDP-Gal:betaGlcNAc beta 1,4- galactosyltransferase, polypeptide 5                  | B4GALT5           | 9334         |
| 221485_at    | UDP-Gal:betaGlcNAc beta 1,4- galactosyltransferase, polypeptide 5                  | B4GALT5           | 9334         |
| 206233_at    | UDP-Gal:betaGlcNAc beta 1,4- galactosyltransferase, polypeptide 6                  | B4GALT6           | 9331         |
| 235333_at    | UDP-Gal:betaGlcNAc beta 1,4- galactosyltransferase, polypeptide 6                  | B4GALT6           | 9331         |
| 226859_at    | DnaJ-like protein                                                                  | bA16L21.2.1       | 548645       |
| 222446_s_at  | beta-site APP-cleaving enzyme 2                                                    | BACE2             | 25825        |
| 221234_s_at  | BTB and CNC homology 1, basic leucine zipper transcription factor 2                | BACH2             | 60468        |
| 236796_at    | BTB and CNC homology 1, basic leucine zipper transcription factor 2                | BACH2             | 60468        |
| 209364_at    | BCL2-antagonist of cell death                                                      | BAD               | 572          |
| 202387_at    | BCL2-associated athanogene                                                         | BAG1              | 573          |
| 209406_at    | BCL2-associated athanogene 2                                                       | BAG2              | 9532         |
| 202984_s_at  | BCL2-associated athanogene 5                                                       | BAG5              | 9529         |
| 207712_at    | B melanoma antigen                                                                 | BAGE              | 574          |
| 1555409_a_at | myeloid/lymphoid or mixed-lineage leukemia 3 /// B melanoma antigen family,        | BAGE2 /// BAGE3 / | 58508 /// 85 |
| 1555408_at   | B melanoma antigen family, member 4 /// B melanoma antigen family, member          | BAGE2 /// BAGE4   | 85317 /// 85 |
| 1559048_at   | BAH domain and coiled-coil containing 1                                            | BAHCC1            | 57597        |
| 205638_at    | brain-specific angiogenesis inhibitor 3                                            | BAI3              | 577          |
| 219667_s_at  | B-cell scaffold protein with ankyrin repeats 1                                     | BANK1             | 55024        |
| 222915_s_at  | B-cell scaffold protein with ankyrin repeats 1                                     | BANK1             | 55024        |
| 1558662_s_at | B-cell scaffold protein with ankyrin repeats 1                                     | BANK1             | 55024        |
| 228928_x_at  | BTG3 associated nuclear protein                                                    | BANP              | 54971        |
| 219966_x_at  | BTG3 associated nuclear protein /// similar to BTG3 associated nuclear protein i   | BANP /// LOC64981 | 54971        |
| 201419_at    | BRCA1 associated protein-1 (ubiquitin carboxy-terminal hydrolase)                  | BAP1              | 8314         |
| 202391_at    | brain abundant, membrane attached signal protein 1                                 | BASP1             | 10409        |
| 211948_x_at  | BAT2 domain containing 1                                                           | BAT2D1            | 23215        |
| 211946_s_at  | BAT2 domain containing 1                                                           | BAT2D1            | 23215        |
| 214055_x_at  | BAT2 domain containing 1                                                           | BAT2D1            | 23215        |
| 211947_s_at  | BAT2 domain containing 1                                                           | BAT2D1            | 23215        |
| 201255_x_at  | HLA-B associated transcript 3                                                      | BAT3              | 7917         |
| 210208_x_at  | HLA-B associated transcript 3                                                      | BAT3              | 7917         |
| 213318_s_at  | HLA-B associated transcript 3                                                      | BAT3              | 7917         |
| 225476_at    | HLA-B associated transcript 4                                                      | BAT4              | 7918         |
| 217985_s_at  | bromodomain adjacent to zinc finger domain, 1A                                     | BAZ1A             | 11177        |
| 203080_s_at  | bromodomain adjacent to zinc finger domain, 2B                                     | BAZ2B             | 29994        |
| 211692_s_at  | BCL2 binding component 3                                                           | BBC3              | 27113        |
| 219487_at    | Bardet-Biedl syndrome 10                                                           | BBS10             | 79738        |
| 223227_at    | Bardet-Biedl syndrome 2                                                            | BBS2              | 583          |

|              |                                                                                     |                |        |
|--------------|-------------------------------------------------------------------------------------|----------------|--------|
| 212745_s_at  | Bardet-Biedl syndrome 4                                                             | <i>BBS4</i>    | 585    |
| 235007_at    | Bardet-Biedl syndrome 7                                                             | <i>BBS7</i>    | 55212  |
| 225674_at    | B-cell receptor-associated protein 29                                               | <i>BCAP29</i>  | 55973  |
| 203053_at    | breast carcinoma amplified sequence 2                                               | <i>BCAS2</i>   | 10286  |
| 227322_s_at  | BRCA2 and CDKN1A interacting protein                                                | <i>BCCIP</i>   | 56647  |
| 234979_at    | BCDIN3 domain containing                                                            | <i>BCDIN3D</i> | 144233 |
| 202331_at    | branched chain keto acid dehydrogenase E1, alpha polypeptide                        | <i>BCKDHA</i>  | 593    |
| 202030_at    | branched chain ketoacid dehydrogenase kinase                                        | <i>BCKDK</i>   | 10295  |
| 205263_at    | B-cell CLL/lymphoma 10                                                              | <i>BCL10</i>   | 8915   |
| 1557257_at   | B-cell CLL/lymphoma 10                                                              | <i>BCL10</i>   | 8915   |
| 219497_s_at  | B-cell CLL/lymphoma 11A (zinc finger protein)                                       | <i>BCL11A</i>  | 53335  |
| 222891_s_at  | B-cell CLL/lymphoma 11A (zinc finger protein)                                       | <i>BCL11A</i>  | 53335  |
| 1559078_at   | B-cell CLL/lymphoma 11A (zinc finger protein)                                       | <i>BCL11A</i>  | 53335  |
| 219498_s_at  | B-cell CLL/lymphoma 11A (zinc finger protein)                                       | <i>BCL11A</i>  | 53335  |
| 222895_s_at  | B-cell CLL/lymphoma 11B (zinc finger protein)                                       | <i>BCL11B</i>  | 64919  |
| 219528_s_at  | B-cell CLL/lymphoma 11B (zinc finger protein)                                       | <i>BCL11B</i>  | 64919  |
| 203685_at    | B-cell CLL/lymphoma 2                                                               | <i>BCL2</i>    | 596    |
| 205681_at    | BCL2-related protein A1                                                             | <i>BCL2A1</i>  | 597    |
| 223664_x_at  | BCL2-like 13 (apoptosis facilitator)                                                | <i>BCL2L13</i> | 23786  |
| 204908_s_at  | B-cell CLL/lymphoma 3                                                               | <i>BCL3</i>    | 602    |
| 204907_s_at  | B-cell CLL/lymphoma 3                                                               | <i>BCL3</i>    | 602    |
| 215990_s_at  | B-cell CLL/lymphoma 6 (zinc finger protein 51)                                      | <i>BCL6</i>    | 604    |
| 203140_at    | B-cell CLL/lymphoma 6 (zinc finger protein 51)                                      | <i>BCL6</i>    | 604    |
| 223566_s_at  | BCL6 co-repressor                                                                   | <i>BCOR</i>    | 54880  |
| 202315_s_at  | breakpoint cluster region                                                           | <i>BCR</i>     | 613    |
| 211715_s_at  | 3-hydroxybutyrate dehydrogenase, type 1                                             | <i>BDH1</i>    | 622    |
| 218285_s_at  | 3-hydroxybutyrate dehydrogenase, type 2                                             | <i>BDH2</i>    | 56898  |
| 239367_at    | brain-derived neurotrophic factor                                                   | <i>BDNF</i>    | 627    |
| 1567361_at   | brain-derived neurotrophic factor opposite strand                                   | <i>BDNFOS</i>  | 497258 |
| 226290_at    | B double prime 1, subunit of RNA polymerase III transcription initiation factor III | <i>BDP1</i>    | 55814  |
| 207671_s_at  | bestrophin 1                                                                        | <i>BEST1</i>   | 7439   |
| 1554443_s_at | bestrophin 1                                                                        | <i>BEST1</i>   | 7439   |
| 1554442_at   | bestrophin 1                                                                        | <i>BEST1</i>   | 7439   |
| 201169_s_at  | basic helix-loop-helix domain containing, class B, 2                                | <i>BHLHB2</i>  | 8553   |
| 201170_s_at  | basic helix-loop-helix domain containing, class B, 2                                | <i>BHLHB2</i>  | 8553   |
| 1569674_at   | Basic helix-loop-helix domain containing, class B, 9                                | <i>BHLHB9</i>  | 80823  |
| 229437_at    | BIC transcript                                                                      | <i>BIC</i>     | 114614 |
| 220580_at    | bicaudal C homolog 1 (Drosophila)                                                   | <i>BICC1</i>   | 80114  |
| 212702_s_at  | bicaudal D homolog 2 (Drosophila)                                                   | <i>BICD2</i>   | 23299  |
| 209203_s_at  | bicaudal D homolog 2 (Drosophila)                                                   | <i>BICD2</i>   | 23299  |
| 213154_s_at  | bicaudal D homolog 2 (Drosophila)                                                   | <i>BICD2</i>   | 23299  |
| 1553021_s_at | bicaudal D homolog 2 (Drosophila)                                                   | <i>BICD2</i>   | 23299  |
| 227143_s_at  | BH3 interacting domain death agonist                                                | <i>BID</i>     | 637    |
| 204493_at    | BH3 interacting domain death agonist                                                | <i>BID</i>     | 637    |
| 211725_s_at  | BH3 interacting domain death agonist                                                | <i>BID</i>     | 637    |
| 219191_s_at  | bridging integrator 2                                                               | <i>BIN2</i>    | 51411  |
| 210538_s_at  | baculoviral IAP repeat-containing 3                                                 | <i>BIRC3</i>   | 330    |
| 225859_at    | baculoviral IAP repeat-containing 4                                                 | <i>BIRC4</i>   | 331    |
| 228363_at    | baculoviral IAP repeat-containing 4                                                 | <i>BIRC4</i>   | 331    |
| 225858_s_at  | baculoviral IAP repeat-containing 4                                                 | <i>BIRC4</i>   | 331    |
| 206536_s_at  | baculoviral IAP repeat-containing 4                                                 | <i>BIRC4</i>   | 331    |
| 1569289_at   | Basic, immunoglobulin-like variable motif containing                                | <i>BIVM</i>    | 54841  |
| 222761_at    | basic, immunoglobulin-like variable motif containing                                | <i>BIVM</i>    | 54841  |
| 207655_s_at  | B-cell linker                                                                       | <i>BLNK</i>    | 29760  |
| 211729_x_at  | biliverdin reductase A                                                              | <i>BLVRA</i>   | 644    |
| 203773_x_at  | biliverdin reductase A                                                              | <i>BLVRA</i>   | 644    |
| 202201_at    | biliverdin reductase B (flavin reductase (NADPH))                                   | <i>BLVRB</i>   | 645    |
| 210462_at    | basic leucine zipper nuclear factor 1 (JEM-1)                                       | <i>BLZF1</i>   | 8548   |
| 37170_at     | BMP2 inducible kinase                                                               | <i>BMP2K</i>   | 55589  |
| 219546_at    | BMP2 inducible kinase                                                               | <i>BMP2K</i>   | 55589  |
| 59644_at     | BMP2 inducible kinase                                                               | <i>BMP2K</i>   | 55589  |
| 205431_s_at  | bone morphogenetic protein 5                                                        | <i>BMP5</i>    | 653    |
| 206176_at    | bone morphogenetic protein 6                                                        | <i>BMP6</i>    | 654    |

|              |                                                                             |                                       |        |
|--------------|-----------------------------------------------------------------------------|---------------------------------------|--------|
| 204832_s_at  | bone morphogenetic protein receptor, type IA                                | <i>BMPR1A</i>                         | 657    |
| 213578_at    | bone morphogenetic protein receptor, type IA                                | <i>BMPR1A</i>                         | 657    |
| 225144_at    | bone morphogenetic protein receptor, type II (serine/threonine kinase)      | <i>BMPR2</i>                          | 659    |
| 238516_at    | bone morphogenetic protein receptor, type II (serine/threonine kinase)      | <i>BMPR2</i>                          | 659    |
| 231106_at    | BMS1 pseudogene 5 /// centaurin, gamma-like family, member 6 /// centaurin, | <i>BMS1P5</i> /// <i>CTGLF1</i>       | 399761 |
| 239151_at    | BMS1 pseudogene 5 /// hypothetical protein LOC643564                        | <i>BMS1P5</i> /// <i>LOC64.642517</i> |        |
| 235723_at    | basonuclin 2                                                                | <i>BNC2</i>                           | 54796  |
| 230722_at    | basonuclin 2                                                                | <i>BNC2</i>                           | 54796  |
| 238478_at    | basonuclin 2                                                                | <i>BNC2</i>                           | 54796  |
| 209308_s_at  | BCL2/adenovirus E1B 19kDa interacting protein 2                             | <i>BNIP2</i>                          | 663    |
| 201848_s_at  | BCL2/adenovirus E1B 19kDa interacting protein 3                             | <i>BNIP3</i>                          | 664    |
| 201849_at    | BCL2/adenovirus E1B 19kDa interacting protein 3                             | <i>BNIP3</i>                          | 664    |
| 221479_s_at  | BCL2/adenovirus E1B 19kDa interacting protein 3-like                        | <i>BNIP3L</i>                         | 665    |
| 221478_at    | BCL2/adenovirus E1B 19kDa interacting protein 3-like                        | <i>BNIP3L</i>                         | 665    |
| 231500_s_at  | BolA homolog 2 (E. coli)                                                    | <i>BOLA2</i>                          | 552900 |
| 241644_at    | bolA homolog 2 (E. coli)                                                    | <i>BOLA2</i>                          | 552900 |
| 205557_at    | bactericidal/permeability-increasing protein                                | <i>BPI</i>                            | 671    |
| 230056_at    | bromodomain PHD finger transcription factor                                 | <i>BPTF</i>                           | 2186   |
| 232909_s_at  | bromodomain PHD finger transcription factor                                 | <i>BPTF</i>                           | 2186   |
| 243829_at    | v-raf murine sarcoma viral oncogene homolog B1                              | <i>BRAF</i>                           | 673    |
| 206044_s_at  | v-raf murine sarcoma viral oncogene homolog B1                              | <i>BRAF</i>                           | 673    |
| 209922_at    | BRCA1 associated protein                                                    | <i>BRAP</i>                           | 8315   |
| 209923_s_at  | BRCA1 associated protein                                                    | <i>BRAP</i>                           | 8315   |
| 214727_at    | breast cancer 2, early onset                                                | <i>BRCA2</i>                          | 675    |
| 208685_x_at  | bromodomain containing 2                                                    | <i>BRD2</i>                           | 6046   |
| 214911_s_at  | bromodomain containing 2                                                    | <i>BRD2</i>                           | 6046   |
| 208686_s_at  | bromodomain containing 2                                                    | <i>BRD2</i>                           | 6046   |
| 203825_at    | bromodomain containing 3                                                    | <i>BRD3</i>                           | 8019   |
| 205550_s_at  | brain and reproductive organ-expressed (TNFRSF1A modulator)                 | <i>BRE</i>                            | 9577   |
| 211566_x_at  | brain and reproductive organ-expressed (TNFRSF1A modulator)                 | <i>BRE</i>                            | 9577   |
| 212645_x_at  | brain and reproductive organ-expressed (TNFRSF1A modulator)                 | <i>BRE</i>                            | 9577   |
| 223376_s_at  | brain protein I3                                                            | <i>BRI3</i>                           | 25798  |
| 231810_at    | BRI3 binding protein                                                        | <i>BRI3BP</i>                         | 140707 |
| 215631_s_at  | breast cancer metastasis suppressor 1                                       | <i>BRMS1</i>                          | 25855  |
| 224484_s_at  | breast cancer metastasis-suppressor 1-like                                  | <i>BRMS1L</i>                         | 84312  |
| 226580_at    | breast cancer metastasis-suppressor 1-like                                  | <i>BRMS1L</i>                         | 84312  |
| 225217_s_at  | bromodomain and PHD finger containing, 3                                    | <i>BRPF3</i>                          | 27154  |
| 207369_at    | bombesin-like receptor 3                                                    | <i>BRS3</i>                           | 680    |
| 227775_at    | bruno-like 6, RNA binding protein (Drosophila)                              | <i>BRUNOL6</i>                        | 60677  |
| 244622_at    | Bromodomain and WD repeat domain containing 1                               | <i>BRWD1</i>                          | 54014  |
| 218090_s_at  | bromodomain and WD repeat domain containing 2                               | <i>BRWD2</i>                          | 55717  |
| 229694_at    | bromodomain and WD repeat domain containing 2                               | <i>BRWD2</i>                          | 55717  |
| 1553252_a_at | bromodomain and WD repeat domain containing 3                               | <i>BRWD3</i>                          | 254065 |
| 235156_at    | bromodomain and WD repeat domain containing 3                               | <i>BRWD3</i>                          | ---    |
| 222200_s_at  | BSD domain containing 1                                                     | <i>BSDC1</i>                          | 55108  |
| 205715_at    | bone marrow stromal cell antigen 1                                          | <i>BST1</i>                           | 683    |
| 201641_at    | bone marrow stromal cell antigen 2                                          | <i>BST2</i>                           | 684    |
| 228570_at    | BTB (POZ) domain containing 11                                              | <i>BTBD11</i>                         | 121551 |
| 239687_at    | BTB (POZ) domain containing 12                                              | <i>BTBD12</i>                         | 84464  |
| 202946_s_at  | BTB (POZ) domain containing 3                                               | <i>BTBD3</i>                          | 22903  |
| 225389_at    | BTB (POZ) domain containing 6                                               | <i>BTBD6</i>                          | 90135  |
| 224945_at    | BTB (POZ) domain containing 7                                               | <i>BTBD7</i>                          | 55727  |
| 214116_at    | biotinidase                                                                 | <i>BTB</i>                            | 686    |
| 226963_at    | basic transcription factor 3-like 4                                         | <i>BTF3L4</i>                         | 91408  |
| 1559975_at   | B-cell translocation gene 1, anti-proliferative                             | <i>BTG1</i>                           | 694    |
| 200921_s_at  | B-cell translocation gene 1, anti-proliferative                             | <i>BTG1</i>                           | 694    |
| 200920_s_at  | B-cell translocation gene 1, anti-proliferative                             | <i>BTG1</i>                           | 694    |
| 215425_at    | BTG family, member 3                                                        | <i>BTG3</i>                           | 10950  |
| 213134_x_at  | BTG family, member 3                                                        | <i>BTG3</i>                           | 10950  |
| 1554362_at   | B-cell translocation gene 4                                                 | <i>BTG4</i>                           | 54766  |
| 205504_at    | Bruton agammaglobulinemia tyrosine kinase                                   | <i>BTK</i>                            | 695    |
| 205299_s_at  | butyrophilin, subfamily 2, member A2                                        | <i>BTN2A2</i>                         | 10385  |
| 209770_at    | butyrophilin, subfamily 3, member A1                                        | <i>BTN3A1</i>                         | 11119  |

|              |                                                                                  |                                |              |
|--------------|----------------------------------------------------------------------------------|--------------------------------|--------------|
| 212613_at    | butyrophilin, subfamily 3, member A2                                             | <i>BTN3A2</i>                  | 11118        |
| 209846_s_at  | butyrophilin, subfamily 3, member A2                                             | <i>BTN3A2</i>                  | 11118        |
| 204820_s_at  | butyrophilin, subfamily 3, member A3 /// butyrophilin, subfamily 3, member A2    | <i>BTN3A2</i> /// <i>BTN3A</i> | 10384 /// 1: |
| 204821_at    | butyrophilin, subfamily 3, member A3                                             | <i>BTN3A3</i>                  | 10384        |
| 38241_at     | butyrophilin, subfamily 3, member A3                                             | <i>BTN3A3</i>                  | 10384        |
| 209974_s_at  | BUB3 budding uninhibited by benzimidazoles 3 homolog (yeast)                     | <i>BUB3</i>                    | 9184         |
| 201458_s_at  | BUB3 budding uninhibited by benzimidazoles 3 homolog (yeast)                     | <i>BUB3</i>                    | 9184         |
| 205690_s_at  | BUD31 homolog ( <i>S. cerevisiae</i> )                                           | <i>BUD31</i>                   | 8896         |
| 234243_at    | brix domain containing 5                                                         | <i>BXDC5</i>                   | 80135        |
| 205839_s_at  | benzodiazapine receptor (peripheral) associated protein 1                        | <i>BZRAP1</i>                  | 9256         |
| 200777_s_at  | basic leucine zipper and W2 domains 1 /// similar to basic leucine zipper and W: | <i>BZW1</i> /// <i>LOC1515</i> | 9689         |
| 200776_s_at  | basic leucine zipper and W2 domains 1 /// similar to basic leucine zipper and W: | <i>BZW1</i> /// <i>LOC1515</i> | 151579 /// ? |
| 224667_x_at  | chromosome 10 open reading frame 104                                             | <i>C10orf104</i>               | 119504       |
| 229145_at    | chromosome 10 open reading frame 104                                             | <i>C10orf104</i>               | 119504       |
| 224664_at    | chromosome 10 open reading frame 104                                             | <i>C10orf104</i>               | 119504       |
| 224665_at    | chromosome 10 open reading frame 104                                             | <i>C10orf104</i>               | 119504       |
| 1557548_at   | chromosome 10 open reading frame 108                                             | <i>C10orf108</i>               | 414235       |
| 220703_at    | chromosome 10 open reading frame 110                                             | <i>C10orf110</i>               | 55853        |
| 229399_at    | chromosome 10 open reading frame 118                                             | <i>C10orf118</i>               | 55088        |
| 227701_at    | chromosome 10 open reading frame 118                                             | <i>C10orf118</i>               | 55088        |
| 217905_at    | chromosome 10 open reading frame 119                                             | <i>C10orf119</i>               | 79892        |
| 213410_at    | chromosome 10 open reading frame 137                                             | <i>C10orf137</i>               | 26098        |
| 227777_at    | chromosome 10 open reading frame 18                                              | <i>C10orf18</i>                | 54906        |
| 238795_at    | chromosome 10 open reading frame 18                                              | <i>C10orf18</i>                | 54906        |
| 212502_at    | chromosome 10 open reading frame 22                                              | <i>C10orf22</i>                | 84890        |
| 212500_at    | chromosome 10 open reading frame 22                                              | <i>C10orf22</i>                | 84890        |
| 202808_at    | chromosome 10 open reading frame 26                                              | <i>C10orf26</i>                | 54838        |
| 228374_at    | chromosome 10 open reading frame 28                                              | <i>C10orf28</i>                | 27291        |
| 210455_at    | chromosome 10 open reading frame 28                                              | <i>C10orf28</i>                | 27291        |
| 212771_at    | chromosome 10 open reading frame 38                                              | <i>C10orf38</i>                | 221061       |
| 226398_s_at  | chromosome 10 open reading frame 4                                               | <i>C10orf4</i>                 | 118924       |
| 227136_s_at  | Chromosome 10 open reading frame 46                                              | <i>C10orf46</i>                | 143384       |
| 225373_at    | chromosome 10 open reading frame 54                                              | <i>C10orf54</i>                | 64115        |
| 225372_at    | chromosome 10 open reading frame 54                                              | <i>C10orf54</i>                | 64115        |
| 1557531_a_at | chromosome 10 open reading frame 55                                              | <i>C10orf55</i>                | 414236       |
| 228155_at    | chromosome 10 open reading frame 58                                              | <i>C10orf58</i>                | 84293        |
| 223824_at    | chromosome 10 open reading frame 59                                              | <i>C10orf59</i>                | 55328        |
| 203481_at    | chromosome 10 open reading frame 6                                               | <i>C10orf6</i>                 | 55719        |
| 1553863_at   | chromosome 10 open reading frame 64                                              | <i>C10orf64</i>                | 57705        |
| 239093_at    | chromosome 10 open reading frame 65                                              | <i>C10orf65</i>                | 112817       |
| 1553845_x_at | chromosome 10 open reading frame 67                                              | <i>C10orf67</i>                | 256815       |
| 55662_at     | chromosome 10 open reading frame 76                                              | <i>C10orf76</i>                | 79591        |
| 236027_at    | chromosome 10 open reading frame 78                                              | <i>C10orf78</i>                | 119392       |
| 238794_at    | chromosome 10 open reading frame 78                                              | <i>C10orf78</i>                | 119392       |
| 1557544_at   | chromosome 10 open reading frame 80                                              | <i>C10orf80</i>                | 159686       |
| 222852_at    | chromosome 10 open reading frame 88                                              | <i>C10orf88</i>                | 80007        |
| 218213_s_at  | chromosome 11 open reading frame 10                                              | <i>C11orf10</i>                | 746          |
| 220560_at    | chromosome 11 open reading frame 21                                              | <i>C11orf21</i>                | 29125        |
| 1569349_at   | chromosome 11 open reading frame 30                                              | <i>C11orf30</i>                | 56946        |
| 228331_at    | chromosome 11 open reading frame 31                                              | <i>C11orf31</i>                | 280636       |
| 1559623_at   | Chromosome 11 open reading frame 54                                              | <i>C11orf54</i>                | 28970        |
| 223268_at    | chromosome 11 open reading frame 54                                              | <i>C11orf54</i>                | 28970        |
| 229851_s_at  | chromosome 11 open reading frame 54                                              | <i>C11orf54</i>                | 28970        |
| 223009_at    | chromosome 11 open reading frame 59                                              | <i>C11orf59</i>                | 55004        |
| 221208_s_at  | chromosome 11 open reading frame 61                                              | <i>C11orf61</i>                | 79684        |
| 1554764_a_at | chromosome 11 open reading frame 64                                              | <i>C11orf64</i>                | 283197       |
| 235402_at    | chromosome 11 open reading frame 66                                              | <i>C11orf66</i>                | 220004       |
| 221534_at    | chromosome 11 open reading frame 68                                              | <i>C11orf68</i>                | 83638        |
| 218789_s_at  | chromosome 11 open reading frame 71                                              | <i>C11orf71</i>                | 54494        |
| 219806_s_at  | chromosome 11 open reading frame 75                                              | <i>C11orf75</i>                | 56935        |
| 223048_at    | chromosome 11 open reading frame 79                                              | <i>C11orf79</i>                | 54949        |
| 238593_at    | chromosome 11 open reading frame 80                                              | <i>C11orf80</i>                | 79703        |
| 221652_s_at  | chromosome 12 open reading frame 11                                              | <i>C12orf11</i>                | 55726        |

|              |                                      |                  |              |
|--------------|--------------------------------------|------------------|--------------|
| 229018_at    | chromosome 12 open reading frame 26  | <i>C12orf26</i>  | 84190        |
| 213701_at    | chromosome 12 open reading frame 29  | <i>C12orf29</i>  | 91298        |
| 225888_at    | chromosome 12 open reading frame 30  | <i>C12orf30</i>  | 80018        |
| 224446_at    | chromosome 12 open reading frame 31  | <i>C12orf31</i>  | 84298        |
| 227152_at    | chromosome 12 open reading frame 35  | <i>C12orf35</i>  | 55196        |
| 218614_at    | chromosome 12 open reading frame 35  | <i>C12orf35</i>  | 55196        |
| 218374_s_at  | chromosome 12 open reading frame 4   | <i>C12orf4</i>   | 57102        |
| 222613_at    | chromosome 12 open reading frame 4   | <i>C12orf4</i>   | 57102        |
| 219817_at    | chromosome 12 open reading frame 47  | <i>C12orf47</i>  | 51275        |
| 220060_s_at  | chromosome 12 open reading frame 48  | <i>C12orf48</i>  | 55010        |
| 224147_at    | chromosome 12 open reading frame 48  | <i>C12orf48</i>  | 55010        |
| 222767_s_at  | chromosome 12 open reading frame 49  | <i>C12orf49</i>  | 79794        |
| 244378_at    | Chromosome 12 open reading frame 51  | <i>C12orf51</i>  | 283450       |
| 224719_s_at  | chromosome 12 open reading frame 57  | <i>C12orf57</i>  | 113246       |
| 218723_s_at  | chromosome 13 open reading frame 15  | <i>C13orf15</i>  | 28984        |
| 219471_at    | chromosome 13 open reading frame 18  | <i>C13orf18</i>  | 728970 /// ε |
| 44790_s_at   | chromosome 13 open reading frame 18  | <i>C13orf18</i>  | 728970 /// ε |
| 240667_at    | Chromosome 13 open reading frame 21  | <i>C13orf21</i>  | 387923       |
| 225887_at    | chromosome 13 open reading frame 23  | <i>C13orf23</i>  | 80209        |
| 218420_s_at  | chromosome 13 open reading frame 23  | <i>C13orf23</i>  | 80209        |
| 1553141_at   | chromosome 13 open reading frame 31  | <i>C13orf31</i>  | 144811       |
| 219303_at    | chromosome 13 open reading frame 7   | <i>C13orf7</i>   | 79596        |
| 226194_at    | chromosome 13 open reading frame 8   | <i>C13orf8</i>   | 283489       |
| 223547_at    | chromosome 14 open reading frame 100 | <i>C14orf100</i> | 51528        |
| 219166_at    | chromosome 14 open reading frame 104 | <i>C14orf104</i> | 55172        |
| 241816_at    | Chromosome 14 open reading frame 106 | <i>C14orf106</i> | 55320        |
| 206500_s_at  | chromosome 14 open reading frame 106 | <i>C14orf106</i> | 55320        |
| 226630_at    | chromosome 14 open reading frame 106 | <i>C14orf106</i> | 55320        |
| 218139_s_at  | chromosome 14 open reading frame 108 | <i>C14orf108</i> | 55745        |
| 213246_at    | chromosome 14 open reading frame 109 | <i>C14orf109</i> | 26175        |
| 217645_at    | chromosome 14 open reading frame 112 | <i>C14orf112</i> | 51241        |
| 229514_at    | chromosome 14 open reading frame 118 | <i>C14orf118</i> | 55668        |
| 219972_s_at  | chromosome 14 open reading frame 135 | <i>C14orf135</i> | 100130173 ,  |
| 219563_at    | chromosome 14 open reading frame 139 | <i>C14orf139</i> | 79686        |
| 214264_s_at  | chromosome 14 open reading frame 143 | <i>C14orf143</i> | 90141        |
| 232814_x_at  | Chromosome 14 open reading frame 153 | <i>C14orf153</i> | 84334        |
| 225948_at    | chromosome 14 open reading frame 153 | <i>C14orf153</i> | 84334        |
| 218298_s_at  | chromosome 14 open reading frame 159 | <i>C14orf159</i> | 80017        |
| 219526_at    | chromosome 14 open reading frame 169 | <i>C14orf169</i> | 79697        |
| 227029_at    | chromosome 14 open reading frame 24  | <i>C14orf24</i>  | 283635       |
| 235369_at    | chromosome 14 open reading frame 28  | <i>C14orf28</i>  | 122525       |
| 212643_at    | chromosome 14 open reading frame 32  | <i>C14orf32</i>  | 93487        |
| 212497_at    | chromosome 14 open reading frame 32  | <i>C14orf32</i>  | 93487        |
| 212644_s_at  | chromosome 14 open reading frame 32  | <i>C14orf32</i>  | 93487        |
| 1561985_at   | chromosome 14 open reading frame 39  | <i>C14orf39</i>  | 317761       |
| 242608_x_at  | Chromosome 14 open reading frame 44  | <i>C14orf44</i>  | 145483       |
| 220173_at    | chromosome 14 open reading frame 45  | <i>C14orf45</i>  | 80127        |
| 1563524_a_at | chromosome 14 open reading frame 85  | <i>C14orf85</i>  | 319085       |
| 234594_at    | chromosome 14 open reading frame 85  | <i>C14orf85</i>  | 319085       |
| 219009_at    | chromosome 14 open reading frame 93  | <i>C14orf93</i>  | 60686        |
| 218383_at    | chromosome 14 open reading frame 94  | <i>C14orf94</i>  | 54930        |
| 242649_x_at  | chromosome 15 open reading frame 21  | <i>C15orf21</i>  | 283651       |
| 217898_at    | chromosome 15 open reading frame 24  | <i>C15orf24</i>  | 56851        |
| 218791_s_at  | chromosome 15 open reading frame 29  | <i>C15orf29</i>  | 79768        |
| 222745_s_at  | chromosome 15 open reading frame 29  | <i>C15orf29</i>  | 79768        |
| 1556588_at   | chromosome 15 open reading frame 37  | <i>C15orf37</i>  | 283687       |
| 204494_s_at  | chromosome 15 open reading frame 39  | <i>C15orf39</i>  | 56905        |
| 1552310_at   | chromosome 15 open reading frame 40  | <i>C15orf40</i>  | 123207       |
| 1568801_at   | chromosome 15 open reading frame 44  | <i>C15orf44</i>  | 81556        |
| 223484_at    | chromosome 15 open reading frame 48  | <i>C15orf48</i>  | 84419        |
| 208109_s_at  | chromosome 15 open reading frame 5   | <i>C15orf5</i>   | 81698        |
| 227380_x_at  | Chromosome 16 open reading frame 13  | <i>C16orf13</i>  | 84326        |
| 227378_x_at  | chromosome 16 open reading frame 13  | <i>C16orf13</i>  | 84326        |

|              |                                                                              |                    |              |
|--------------|------------------------------------------------------------------------------|--------------------|--------------|
| 225861_at    | chromosome 16 open reading frame 14                                          | C16orf14           | 84331        |
| 1553715_s_at | chromosome 16 open reading frame 14                                          | C16orf14           | 84331        |
| 221064_s_at  | chromosome 16 open reading frame 28                                          | C16orf28           | 64718        |
| 219315_s_at  | chromosome 16 open reading frame 30                                          | C16orf30           | 79652        |
| 218493_at    | chromosome 16 open reading frame 33                                          | C16orf33           | 79622        |
| 213105_s_at  | chromosome 16 open reading frame 42                                          | C16orf42           | 115939       |
| 212736_at    | chromosome 16 open reading frame 45                                          | C16orf45           | 89927        |
| 230721_at    | chromosome 16 open reading frame 52                                          | C16orf52           | 730094       |
| 227351_at    | chromosome 16 open reading frame 52                                          | C16orf52           | 730094       |
| 1554119_at   | chromosome 16 open reading frame 57                                          | C16orf57           | 79650        |
| 1568954_s_at | chromosome 16 open reading frame 72                                          | C16orf72           | 29035        |
| 1553990_at   | chromosome 16 open reading frame 79                                          | C16orf79           | 283870       |
| 224447_s_at  | chromosome 17 open reading frame 37                                          | C17orf37           | 84299        |
| 220606_s_at  | chromosome 17 open reading frame 48                                          | C17orf48           | 56985        |
| 224574_at    | chromosome 17 open reading frame 49 /// similar to DNA segment, Chr 11, Brig | C17orf49 /// MGC7  | 124944 /// 4 |
| 226901_at    | chromosome 17 open reading frame 58                                          | C17orf58           | 284018       |
| 219435_at    | chromosome 17 open reading frame 68                                          | C17orf68           | 80169        |
| 1553486_a_at | chromosome 17 open reading frame 78                                          | C17orf78           | 284099       |
| 225096_at    | chromosome 17 open reading frame 79                                          | C17orf79           | 55352        |
| 223351_at    | chromosome 17 open reading frame 80                                          | C17orf80           | 55028        |
| 223286_at    | chromosome 17 open reading frame 81                                          | C17orf81           | 23587        |
| 222779_s_at  | chromosome 17 open reading frame 85                                          | C17orf85           | 55421        |
| 209574_s_at  | chromosome 18 open reading frame 1                                           | C18orf1            | 753          |
| 207996_s_at  | chromosome 18 open reading frame 1                                           | C18orf1            | 753          |
| 1560751_at   | chromosome 18 open reading frame 16                                          | C18orf16           | 147429       |
| 242149_at    | chromosome 18 open reading frame 19                                          | C18orf19           | 125228       |
| 230739_at    | chromosome 18 open reading frame 19                                          | C18orf19           | 125228       |
| 235022_at    | chromosome 18 open reading frame 19                                          | C18orf19           | 125228       |
| 1553934_at   | chromosome 18 open reading frame 20                                          | C18orf20           | 221241       |
| 224957_at    | chromosome 18 open reading frame 32                                          | C18orf32           | 497661       |
| 1559716_at   | chromosome 18 open reading frame 37                                          | C18orf37           | 125476       |
| 224493_x_at  | chromosome 18 open reading frame 45                                          | C18orf45           | 85019        |
| 244495_x_at  | chromosome 18 open reading frame 45                                          | C18orf45           | 85019        |
| 232222_at    | zinc finger, CCHC domain containing 2 /// chromosome 18 open reading frame 4 | C18orf49 /// ZCCHC | 400653       |
| 238480_at    | Chromosome 18 open reading frame 50                                          | C18orf50           | ---          |
| 1570552_at   | chromosome 18 open reading frame 50                                          | C18orf50           | 619463       |
| 229442_at    | chromosome 18 open reading frame 54                                          | C18orf54           | 162681       |
| 241733_at    | Chromosome 18 open reading frame 54                                          | C18orf54           | 162681       |
| 225863_s_at  | chromosome 19 open reading frame 12                                          | C19orf12           | 83636        |
| 223983_s_at  | chromosome 19 open reading frame 12                                          | C19orf12           | 83636        |
| 222266_at    | Chromosome 19 open reading frame 2                                           | C19orf2            | 8725         |
| 214173_x_at  | chromosome 19 open reading frame 2                                           | C19orf2            | 8725         |
| 226516_at    | chromosome 19 open reading frame 28                                          | C19orf28           | 126321       |
| 229650_s_at  | chromosome 19 open reading frame 42                                          | C19orf42           | 79086        |
| 200076_s_at  | chromosome 19 open reading frame 50                                          | C19orf50           | 79036        |
| 235568_at    | chromosome 19 open reading frame 59                                          | C19orf59           | 199675       |
| 212575_at    | chromosome 19 open reading frame 6                                           | C19orf6            | 91304        |
| 213390_at    | chromosome 19 open reading frame 7                                           | C19orf7            | 23211        |
| 219283_at    | C1GALT1-specific chaperone 1                                                 | C1GALT1C1          | 29071        |
| 220235_s_at  | chromosome 1 open reading frame 103                                          | C1orf103           | 55791        |
| 217893_s_at  | chromosome 1 open reading frame 108                                          | C1orf108           | 79647        |
| 222458_s_at  | chromosome 1 open reading frame 108                                          | C1orf108           | 79647        |
| 222459_at    | chromosome 1 open reading frame 108                                          | C1orf108           | 79647        |
| 220193_at    | chromosome 1 open reading frame 113                                          | C1orf113           | 79729        |
| 222495_at    | chromosome 1 open reading frame 119 /// similar to K07F5.15                  | C1orf119 /// LOC7  | 56900        |
| 219875_s_at  | chromosome 1 open reading frame 121                                          | C1orf121           | 51029        |
| 203197_s_at  | chromosome 1 open reading frame 123                                          | C1orf123           | 54987        |
| 223124_s_at  | chromosome 1 open reading frame 128                                          | C1orf128           | 57095        |
| 226242_at    | chromosome 1 open reading frame 131                                          | C1orf131           | 128061       |
| 1557192_at   | chromosome 1 open reading frame 136                                          | C1orf136           | ---          |
| 225244_at    | chromosome 1 open reading frame 142                                          | C1orf142           | 116841       |
| 212003_at    | chromosome 1 open reading frame 144                                          | C1orf144           | 26099        |
| 212004_at    | chromosome 1 open reading frame 144                                          | C1orf144           | 26099        |

|              |                                                                           |                                 |              |
|--------------|---------------------------------------------------------------------------|---------------------------------|--------------|
| 218165_at    | chromosome 1 open reading frame 149                                       | <i>C1orf149</i>                 | 64769        |
| 213528_at    | chromosome 1 open reading frame 156                                       | <i>C1orf156</i>                 | 92342        |
| 219337_at    | chromosome 1 open reading frame 159                                       | <i>C1orf159</i>                 | 54991        |
| 52078_at     | chromosome 1 open reading frame 160                                       | <i>C1orf160</i>                 | 84065        |
| 228532_at    | chromosome 1 open reading frame 162                                       | <i>C1orf162</i>                 | 128346       |
| 219988_s_at  | chromosome 1 open reading frame 164                                       | <i>C1orf164</i>                 | 55182        |
| 1561976_at   | chromosome 1 open reading frame 167                                       | <i>C1orf167</i>                 | 284498       |
| 222000_at    | chromosome 1 open reading frame 174                                       | <i>C1orf174</i>                 | 339448       |
| 46167_at     | tetratricopeptide repeat domain 4 /// chromosome 1 open reading frame 175 | <i>C1orf175</i> /// <i>TTC4</i> | 7268         |
| 1563743_at   | chromosome 1 open reading frame 180                                       | <i>C1orf180</i>                 | 439927       |
| 218932_at    | chromosome 1 open reading frame 181                                       | <i>C1orf181</i>                 | 54680        |
| 229608_at    | chromosome 1 open reading frame 183                                       | <i>C1orf183</i>                 | 55924        |
| 1564164_at   | chromosome 1 open reading frame 218                                       | <i>C1orf218</i>                 | 163486       |
| 219696_at    | chromosome 1 open reading frame 218                                       | <i>C1orf218</i>                 | 163486       |
| 223548_at    | chromosome 1 open reading frame 26                                        | <i>C1orf26</i>                  | 54823        |
| 207571_x_at  | chromosome 1 open reading frame 38                                        | <i>C1orf38</i>                  | 9473         |
| 210785_s_at  | chromosome 1 open reading frame 38                                        | <i>C1orf38</i>                  | 9473         |
| 223034_s_at  | chromosome 1 open reading frame 43                                        | <i>C1orf43</i>                  | 25912        |
| 1555226_s_at | chromosome 1 open reading frame 43                                        | <i>C1orf43</i>                  | 25912        |
| 1555225_at   | chromosome 1 open reading frame 43                                        | <i>C1orf43</i>                  | 25912        |
| 219406_at    | chromosome 1 open reading frame 50                                        | <i>C1orf50</i>                  | 79078        |
| 244103_at    | chromosome 1 open reading frame 55                                        | <i>C1orf55</i>                  | 163859       |
| 223272_s_at  | chromosome 1 open reading frame 57                                        | <i>C1orf57</i>                  | 84284        |
| 241908_at    | Chromosome 1 open reading frame 58                                        | <i>C1orf58</i>                  | 148362       |
| 226128_at    | chromosome 1 open reading frame 58                                        | <i>C1orf58</i>                  | ---          |
| 239078_at    | chromosome 1 open reading frame 58                                        | <i>C1orf58</i>                  | 148362       |
| 225841_at    | chromosome 1 open reading frame 59                                        | <i>C1orf59</i>                  | 113802       |
| 209007_s_at  | chromosome 1 open reading frame 63                                        | <i>C1orf63</i>                  | 57035        |
| 209006_s_at  | chromosome 1 open reading frame 63                                        | <i>C1orf63</i>                  | 57035        |
| 242283_at    | chromosome 1 open reading frame 67                                        | <i>C1orf67</i>                  | 127602 /// : |
| 1554660_a_at | chromosome 1 open reading frame 71                                        | <i>C1orf71</i>                  | 163882       |
| 225550_at    | chromosome 1 open reading frame 71                                        | <i>C1orf71</i>                  | 163882       |
| 225551_at    | chromosome 1 open reading frame 71                                        | <i>C1orf71</i>                  | 163882       |
| 222752_s_at  | chromosome 1 open reading frame 75                                        | <i>C1orf75</i>                  | 55248        |
| 202559_x_at  | chromosome 1 open reading frame 77                                        | <i>C1orf77</i>                  | 26097        |
| 223774_at    | chromosome 1 open reading frame 79                                        | <i>C1orf79</i>                  | 85028        |
| 223773_s_at  | chromosome 1 open reading frame 79                                        | <i>C1orf79</i>                  | 85028        |
| 220199_s_at  | chromosome 1 open reading frame 80                                        | <i>C1orf80</i>                  | 64853        |
| 1558692_at   | chromosome 1 open reading frame 85                                        | <i>C1orf85</i>                  | 112770       |
| 1558693_s_at | chromosome 1 open reading frame 85                                        | <i>C1orf85</i>                  | 112770       |
| 203429_s_at  | chromosome 1 open reading frame 9                                         | <i>C1orf9</i>                   | 51430        |
| 231835_at    | chromosome 1 open reading frame 93                                        | <i>C1orf93</i>                  | 127281       |
| 1553698_a_at | chromosome 1 open reading frame 96                                        | <i>C1orf96</i>                  | 126731       |
| 225904_at    | chromosome 1 open reading frame 96                                        | <i>C1orf96</i>                  | 126731       |
| 214214_s_at  | complement component 1, q subcomponent binding protein                    | <i>C1QBP</i>                    | 708          |
| 208910_s_at  | complement component 1, q subcomponent binding protein                    | <i>C1QBP</i>                    | 708          |
| 218983_at    | complement component 1, r subcomponent-like                               | <i>C1RL</i>                     | 51279        |
| 224693_at    | chromosome 20 open reading frame 108                                      | <i>C20orf108</i>                | 116151       |
| 218448_at    | chromosome 20 open reading frame 11                                       | <i>C20orf11</i>                 | 54994        |
| 225376_at    | chromosome 20 open reading frame 11                                       | <i>C20orf11</i>                 | 54994        |
| 221954_at    | Chromosome 20 open reading frame 111                                      | <i>C20orf111</i>                | 51526        |
| 209020_at    | chromosome 20 open reading frame 111                                      | <i>C20orf111</i>                | 51526        |
| 226670_s_at  | chromosome 20 open reading frame 119                                      | <i>C20orf119</i>                | 80336        |
| 228031_at    | chromosome 20 open reading frame 121                                      | <i>C20orf121</i>                | 79183        |
| 1554041_at   | chromosome 20 open reading frame 141                                      | <i>C20orf141</i>                | 128653       |
| 233571_x_at  | chromosome 20 open reading frame 149                                      | <i>C20orf149</i>                | 79144        |
| 218010_x_at  | chromosome 20 open reading frame 149                                      | <i>C20orf149</i>                | 79144        |
| 1570070_at   | chromosome 20 open reading frame 160                                      | <i>C20orf160</i>                | 140706       |
| 231991_at    | chromosome 20 open reading frame 160                                      | <i>C20orf160</i>                | 140706       |
| 225313_at    | chromosome 20 open reading frame 177                                      | <i>C20orf177</i>                | 63939        |
| 228291_s_at  | chromosome 20 open reading frame 19                                       | <i>C20orf19</i>                 | 55857        |
| 200856_x_at  | nuclear receptor co-repressor 1 /// chromosome 20 open reading frame 191  | <i>C20orf191</i> /// <i>NCO</i> | 100133918 ,  |
| 225825_at    | chromosome 20 open reading frame 194                                      | <i>C20orf194</i>                | 25943        |



|              |                                                                              |                           |           |
|--------------|------------------------------------------------------------------------------|---------------------------|-----------|
| 1553311_at   | chromosome 20 open reading frame 197                                         | <i>C20orf197</i>          | 284756    |
| 226227_x_at  | transaldolase 1 /// chromosome 20 open reading frame 199                     | <i>C20orf199</i> /// TALL | 441951    |
| 224915_x_at  | transaldolase 1 /// chromosome 20 open reading frame 199                     | <i>C20orf199</i> /// TALL | 441951    |
| 226835_s_at  | transaldolase 1 /// chromosome 20 open reading frame 199                     | <i>C20orf199</i> /// TALL | 441951    |
| 218586_at    | chromosome 20 open reading frame 20                                          | <i>C20orf20</i>           | 55257     |
| 1553204_at   | chromosome 20 open reading frame 200                                         | <i>C20orf200</i>          | 253868    |
| 1553205_at   | Chromosome 20 open reading frame 200                                         | <i>C20orf200</i>          | 253868    |
| 50314_i_at   | chromosome 20 open reading frame 27                                          | <i>C20orf27</i>           | 54976     |
| 206656_s_at  | chromosome 20 open reading frame 3                                           | <i>C20orf3</i>            | 57136     |
| 233842_x_at  | chromosome 20 open reading frame 43                                          | <i>C20orf43</i>           | 51507     |
| 234926_s_at  | chromosome 20 open reading frame 43                                          | <i>C20orf43</i>           | 51507     |
| 224128_at    | chromosome 20 open reading frame 43                                          | <i>C20orf43</i>           | 51507     |
| 233451_at    | chromosome 20 open reading frame 54                                          | <i>C20orf54</i>           | 113278    |
| 222045_s_at  | chromosome 20 open reading frame 67                                          | <i>C20orf67</i>           | 63935     |
| 221762_s_at  | chromosome 20 open reading frame 67                                          | <i>C20orf67</i>           | 63935     |
| 89948_at     | chromosome 20 open reading frame 67                                          | <i>C20orf67</i>           | 63935     |
| 222044_at    | chromosome 20 open reading frame 67                                          | <i>C20orf67</i>           | 63935     |
| 225890_at    | chromosome 20 open reading frame 72                                          | <i>C20orf72</i>           | 92667     |
| 243689_s_at  | Chromosome 20 open reading frame 80                                          | <i>C20orf80</i>           | 284802    |
| 234949_at    | Chromosome 20 open reading frame 80                                          | <i>C20orf80</i>           | 284802    |
| 228247_at    | Chromosome 20 open reading frame 80 /// CDNA FLJ45377 fis, clone BRHIP301    | <i>C20orf80</i>           | 284802    |
| 235535_x_at  | F5HD region gene 1 /// chromosome 20 open reading frame 80 /// similar to FR | <i>C20orf80</i> /// FRG1  | 100134091 |
| 1566927_at   | chromosome 21 open reading frame 104                                         | <i>C21orf104</i>          | 54748     |
| 1555373_at   | chromosome 21 open reading frame 114                                         | <i>C21orf114</i>          | ---       |
| 232196_at    | chromosome 21 open reading frame 13                                          | <i>C21orf13</i>           | 150082    |
| 1562034_at   | chromosome 21 open reading frame 134                                         | <i>C21orf134</i>          | 727699    |
| 231491_at    | chromosome 21 open reading frame 23                                          | <i>C21orf23</i>           | 54088     |
| 1559412_at   | chromosome 21 open reading frame 34                                          | <i>C21orf34</i>           | 388815    |
| 240801_at    | chromosome 21 open reading frame 37                                          | <i>C21orf37</i>           | 54076     |
| 231303_at    | chromosome 21 open reading frame 42                                          | <i>C21orf42</i>           | 54072     |
| 219004_s_at  | chromosome 21 open reading frame 45                                          | <i>C21orf45</i>           | 54069     |
| 227421_at    | chromosome 21 open reading frame 57                                          | <i>C21orf57</i>           | 54059     |
| 239208_s_at  | Chromosome 21 open reading frame 57                                          | <i>C21orf57</i>           | 54059     |
| 242565_x_at  | Chromosome 21 open reading frame 57                                          | <i>C21orf57</i>           | 54059     |
| 218123_at    | chromosome 21 open reading frame 59                                          | <i>C21orf59</i>           | 56683     |
| 226995_at    | Chromosome 21 open reading frame 86                                          | <i>C21orf86</i>           | 257103    |
| 1552895_a_at | chromosome 21 open reading frame 99                                          | <i>C21orf99</i>           | 149992    |
| 223039_at    | chromosome 22 open reading frame 13                                          | <i>C22orf13</i>           | 83606     |
| 200042_at    | chromosome 22 open reading frame 28                                          | <i>C22orf28</i>           | 51493     |
| 226204_at    | chromosome 22 open reading frame 29                                          | <i>C22orf29</i>           | 79680     |
| 1556072_at   | chromosome 22 open reading frame 37                                          | <i>C22orf37</i>           | 200298    |
| 212421_at    | chromosome 22 open reading frame 9                                           | <i>C22orf9</i>            | 23313     |
| 217118_s_at  | chromosome 22 open reading frame 9                                           | <i>C22orf9</i>            | 23313     |
| 1555100_at   | chromosome 2 open reading frame 13                                           | <i>C2orf13</i>            | 200558    |
| 1554444_s_at | chromosome 2 open reading frame 18                                           | <i>C2orf18</i>            | 54978     |
| 225695_at    | chromosome 2 open reading frame 18                                           | <i>C2orf18</i>            | 54978     |
| 200070_at    | chromosome 2 open reading frame 24                                           | <i>C2orf24</i>            | 27013     |
| 207511_s_at  | chromosome 2 open reading frame 24                                           | <i>C2orf24</i>            | 27013     |
| 222832_s_at  | chromosome 2 open reading frame 33                                           | <i>C2orf33</i>            | 56947     |
| 223091_x_at  | chromosome 2 open reading frame 33                                           | <i>C2orf33</i>            | 56947     |
| 231921_at    | chromosome 2 open reading frame 37                                           | <i>C2orf37</i>            | 80067     |
| 219662_at    | chromosome 2 open reading frame 49                                           | <i>C2orf49</i>            | 79074     |
| 228067_at    | chromosome 2 open reading frame 55                                           | <i>C2orf55</i>            | 343990    |
| 224575_at    | chromosome 3 open reading frame 10                                           | <i>C3orf10</i>            | 55845     |
| 219288_at    | chromosome 3 open reading frame 14                                           | <i>C3orf14</i>            | 57415     |
| 1554528_at   | chromosome 3 open reading frame 15                                           | <i>C3orf15</i>            | 89876     |
| 225281_at    | chromosome 3 open reading frame 17                                           | <i>C3orf17</i>            | 25871     |
| 1558094_s_at | chromosome 3 open reading frame 19                                           | <i>C3orf19</i>            | 51244     |
| 220942_x_at  | chromosome 3 open reading frame 28                                           | <i>C3orf28</i>            | 26355     |
| 223193_x_at  | chromosome 3 open reading frame 28                                           | <i>C3orf28</i>            | 26355     |
| 224345_x_at  | chromosome 3 open reading frame 28                                           | <i>C3orf28</i>            | 26355     |
| 1553158_at   | chromosome 3 open reading frame 34                                           | <i>C3orf34</i>            | 84984     |
| 238969_at    | chromosome 3 open reading frame 55                                           | <i>C3orf55</i>            | 152078    |

|              |                                     |                 |              |
|--------------|-------------------------------------|-----------------|--------------|
| 226464_at    | chromosome 3 open reading frame 58  | <i>C3orf58</i>  | 205428       |
| 209284_s_at  | chromosome 3 open reading frame 63  | <i>C3orf63</i>  | 23272        |
| 209285_s_at  | chromosome 3 open reading frame 63  | <i>C3orf63</i>  | 23272        |
| 1563207_at   | Chromosome 3 open reading frame 65  | <i>C3orf65</i>  | 646600       |
| 238081_at    | chromosome 4 open reading frame 12  | <i>C4orf12</i>  | 404201       |
| 223157_at    | chromosome 4 open reading frame 14  | <i>C4orf14</i>  | 84273        |
| 210054_at    | chromosome 4 open reading frame 15  | <i>C4orf15</i>  | 79441        |
| 223204_at    | chromosome 4 open reading frame 18  | <i>C4orf18</i>  | 51313        |
| 218449_at    | chromosome 4 open reading frame 20  | <i>C4orf20</i>  | 55325        |
| 230319_at    | Chromosome 4 open reading frame 31  | <i>C4orf31</i>  | ---          |
| 227856_at    | chromosome 4 open reading frame 32  | <i>C4orf32</i>  | 132720       |
| 222336_at    | chromosome 4 open reading frame 34  | <i>C4orf34</i>  | 201895       |
| 224990_at    | chromosome 4 open reading frame 34  | <i>C4orf34</i>  | 201895       |
| 1555096_at   | chromosome 4 open reading frame 37  | <i>C4orf37</i>  | 285555       |
| 1553711_a_at | chromosome 4 open reading frame 39  | <i>C4orf39</i>  | 152756       |
| 203600_s_at  | chromosome 4 open reading frame 8   | <i>C4orf8</i>   | 8603         |
| 220088_at    | complement component 5a receptor 1  | <i>C5AR1</i>    | 728          |
| 201310_s_at  | chromosome 5 open reading frame 13  | <i>C5orf13</i>  | 9315         |
| 229260_at    | Chromosome 5 open reading frame 15  | <i>C5orf15</i>  | 56951        |
| 203024_s_at  | chromosome 5 open reading frame 15  | <i>C5orf15</i>  | 56951        |
| 223882_at    | chromosome 5 open reading frame 21  | <i>C5orf21</i>  | 83989        |
| 212936_at    | chromosome 5 open reading frame 21  | <i>C5orf21</i>  | 83989        |
| 203738_at    | chromosome 5 open reading frame 22  | <i>C5orf22</i>  | 55322        |
| 1552660_a_at | chromosome 5 open reading frame 22  | <i>C5orf22</i>  | 55322        |
| 224875_at    | chromosome 5 open reading frame 24  | <i>C5orf24</i>  | 134553       |
| 228805_at    | chromosome 5 open reading frame 25  | <i>C5orf25</i>  | 375484       |
| 219029_at    | chromosome 5 open reading frame 28  | <i>C5orf28</i>  | 64417        |
| 1552386_at   | chromosome 5 open reading frame 29  | <i>C5orf29</i>  | 202309       |
| 218588_s_at  | chromosome 5 open reading frame 3   | <i>C5orf3</i>   | 10827        |
| 221823_at    | chromosome 5 open reading frame 30  | <i>C5orf30</i>  | 90355        |
| 224707_at    | chromosome 5 open reading frame 32  | <i>C5orf32</i>  | 84418        |
| 226946_at    | chromosome 5 open reading frame 33  | <i>C5orf33</i>  | 133686       |
| 227267_at    | chromosome 5 open reading frame 37  | <i>C5orf37</i>  | 134359       |
| 226306_at    | chromosome 6 open reading frame 1   | <i>C6orf1</i>   | 221491       |
| 220614_s_at  | chromosome 6 open reading frame 103 | <i>C6orf103</i> | 79747        |
| 217924_at    | chromosome 6 open reading frame 106 | <i>C6orf106</i> | 64771        |
| 217925_s_at  | chromosome 6 open reading frame 106 | <i>C6orf106</i> | 64771        |
| 205457_at    | chromosome 6 open reading frame 106 | <i>C6orf106</i> | 64771        |
| 226135_at    | chromosome 6 open reading frame 107 | <i>C6orf107</i> | 54887        |
| 232777_s_at  | chromosome 6 open reading frame 118 | <i>C6orf118</i> | 168090       |
| 234097_s_at  | chromosome 6 open reading frame 12  | <i>C6orf12</i>  | 80862        |
| 234457_at    | chromosome 6 open reading frame 12  | <i>C6orf12</i>  | 80862        |
| 221787_at    | chromosome 6 open reading frame 120 | <i>C6orf120</i> | 387263       |
| 238860_at    | chromosome 6 open reading frame 130 | <i>C6orf130</i> | 221443       |
| 237619_at    | chromosome 6 open reading frame 146 | <i>C6orf146</i> | 222826       |
| 1553274_a_at | chromosome 6 open reading frame 151 | <i>C6orf151</i> | 154007       |
| 220324_at    | chromosome 6 open reading frame 155 | <i>C6orf155</i> | 79940        |
| 213312_at    | chromosome 6 open reading frame 162 | <i>C6orf162</i> | 57150        |
| 223144_s_at  | chromosome 6 open reading frame 166 | <i>C6orf166</i> | 55122        |
| 223145_s_at  | chromosome 6 open reading frame 166 | <i>C6orf166</i> | 55122        |
| 223143_s_at  | chromosome 6 open reading frame 166 | <i>C6orf166</i> | 55122        |
| 233050_at    | chromosome 6 open reading frame 174 | <i>C6orf174</i> | 387104 /// ? |
| 1554019_s_at | chromosome 6 open reading frame 182 | <i>C6orf182</i> | 221017 /// ? |
| 228875_at    | chromosome 6 open reading frame 189 | <i>C6orf189</i> | 221303       |
| 226301_at    | chromosome 6 open reading frame 192 | <i>C6orf192</i> | 116843       |
| 223576_at    | chromosome 6 open reading frame 203 | <i>C6orf203</i> | 51250        |
| 228007_at    | chromosome 6 open reading frame 204 | <i>C6orf204</i> | 387119       |
| 218195_at    | chromosome 6 open reading frame 211 | <i>C6orf211</i> | 79624        |
| 209829_at    | chromosome 6 open reading frame 32  | <i>C6orf32</i>  | 9750         |
| 220755_s_at  | chromosome 6 open reading frame 48  | <i>C6orf48</i>  | 50854        |
| 218233_s_at  | chromosome 6 open reading frame 49  | <i>C6orf49</i>  | 100188893 ,  |
| 223516_s_at  | chromosome 6 open reading frame 49  | <i>C6orf49</i>  | 100188893 ,  |
| 238385_at    | Chromosome 6 open reading frame 58  | <i>C6orf58</i>  | 352999       |

|              |                                                                         |                                  |        |
|--------------|-------------------------------------------------------------------------|----------------------------------|--------|
| 220150_s_at  | chromosome 6 open reading frame 60                                      | <i>C6orf60</i>                   | 79632  |
| 213872_at    | Chromosome 6 open reading frame 62                                      | <i>C6orf62</i>                   | ---    |
| 222309_at    | Chromosome 6 open reading frame 62                                      | <i>C6orf62</i>                   | 81688  |
| 222741_s_at  | chromosome 6 open reading frame 64                                      | <i>C6orf64</i>                   | 55776  |
| 219006_at    | chromosome 6 open reading frame 66                                      | <i>C6orf66</i>                   | 29078  |
| 225576_at    | chromosome 6 open reading frame 72                                      | <i>C6orf72</i>                   | 116254 |
| 233206_at    | chromosome 6 open reading frame 85                                      | <i>C6orf85</i>                   | 63027  |
| 242055_at    | Chromosome 6 open reading frame 86                                      | <i>C6orf86</i>                   | ---    |
| 228217_s_at  | chromosome 6 open reading frame 86                                      | <i>C6orf86</i>                   | 389362 |
| 224987_at    | chromosome 6 open reading frame 89                                      | <i>C6orf89</i>                   | 221477 |
| 224977_at    | chromosome 6 open reading frame 89                                      | <i>C6orf89</i>                   | 221477 |
| 224808_s_at  | chromosome 7 open reading frame 20                                      | <i>C7orf20</i>                   | 51608  |
| 204215_at    | chromosome 7 open reading frame 23                                      | <i>C7orf23</i>                   | 79161  |
| 215380_s_at  | chromosome 7 open reading frame 24                                      | <i>C7orf24</i>                   | 79017  |
| 53202_at     | chromosome 7 open reading frame 25                                      | <i>C7orf25</i>                   | 79020  |
| 221573_at    | chromosome 7 open reading frame 25                                      | <i>C7orf25</i>                   | 79020  |
| 201974_s_at  | chromosome 7 open reading frame 28A /// chromosome 7 open reading frame | <i>C7orf28A</i> /// <i>C7orf</i> | 51622  |
| 244641_at    | chromosome 7 open reading frame 30                                      | <i>C7orf30</i>                   | 115416 |
| 230516_at    | Chromosome 7 open reading frame 30                                      | <i>C7orf30</i>                   | 115416 |
| 229146_at    | chromosome 7 open reading frame 31                                      | <i>C7orf31</i>                   | 136895 |
| 226018_at    | chromosome 7 open reading frame 41                                      | <i>C7orf41</i>                   | 222166 |
| 220659_s_at  | chromosome 7 open reading frame 43                                      | <i>C7orf43</i>                   | 55262  |
| 232330_at    | Chromosome 7 open reading frame 44                                      | <i>C7orf44</i>                   | ---    |
| 209446_s_at  | chromosome 7 open reading frame 44                                      | <i>C7orf44</i>                   | 55744  |
| 209445_x_at  | chromosome 7 open reading frame 44                                      | <i>C7orf44</i>                   | 55744  |
| 239490_at    | chromosome 7 open reading frame 44                                      | <i>C7orf44</i>                   | 55744  |
| 226434_at    | chromosome 7 open reading frame 47                                      | <i>C7orf47</i>                   | 221908 |
| 221629_x_at  | chromosome 8 open reading frame 30A                                     | <i>C8orf30A</i>                  | 51236  |
| 219071_x_at  | chromosome 8 open reading frame 30A                                     | <i>C8orf30A</i>                  | 51236  |
| 218187_s_at  | chromosome 8 open reading frame 33                                      | <i>C8orf33</i>                   | 65265  |
| 235509_at    | chromosome 8 open reading frame 38                                      | <i>C8orf38</i>                   | 137682 |
| 219124_at    | chromosome 8 open reading frame 41                                      | <i>C8orf41</i>                   | 80185  |
| 1555243_x_at | chromosome 8 open reading frame 59                                      | <i>C8orf59</i>                   | 401466 |
| 220712_at    | chromosome 8 open reading frame 60                                      | <i>C8orf60</i>                   | 619426 |
| 1558790_s_at | chromosome 8 open reading frame 77                                      | <i>C8orf77</i>                   | 286103 |
| 218565_at    | chromosome 9 open reading frame 114                                     | <i>C9orf114</i>                  | 51490  |
| 226027_at    | chromosome 9 open reading frame 119                                     | <i>C9orf119</i>                  | 375757 |
| 224860_at    | chromosome 9 open reading frame 123                                     | <i>C9orf123</i>                  | 90871  |
| 213386_at    | chromosome 9 open reading frame 125                                     | <i>C9orf125</i>                  | 84302  |
| 243610_at    | chromosome 9 open reading frame 135                                     | <i>C9orf135</i>                  | 138255 |
| 1559293_x_at | Chromosome 9 open reading frame 14                                      | <i>C9orf14</i>                   | 158035 |
| 233589_x_at  | chromosome 9 open reading frame 167                                     | <i>C9orf167</i>                  | 54863  |
| 227534_at    | chromosome 9 open reading frame 21                                      | <i>C9orf21</i>                   | 195827 |
| 223368_s_at  | chromosome 9 open reading frame 32                                      | <i>C9orf32</i>                   | 28989  |
| 223369_at    | chromosome 9 open reading frame 32                                      | <i>C9orf32</i>                   | 28989  |
| 241696_at    | Chromosome 9 open reading frame 39                                      | <i>C9orf39</i>                   | 54875  |
| 228324_at    | chromosome 9 open reading frame 41                                      | <i>C9orf41</i>                   | 138199 |
| 223006_s_at  | chromosome 9 open reading frame 5                                       | <i>C9orf5</i>                    | 23731  |
| 223005_s_at  | chromosome 9 open reading frame 5                                       | <i>C9orf5</i>                    | 23731  |
| 223007_s_at  | chromosome 9 open reading frame 5                                       | <i>C9orf5</i>                    | 23731  |
| 223008_s_at  | chromosome 9 open reading frame 5                                       | <i>C9orf5</i>                    | 23731  |
| 240316_at    | chromosome 9 open reading frame 57                                      | <i>C9orf57</i>                   | 138240 |
| 223075_s_at  | chromosome 9 open reading frame 58                                      | <i>C9orf58</i>                   | 83543  |
| 213900_at    | chromosome 9 open reading frame 61                                      | <i>C9orf61</i>                   | 9413   |
| 235940_at    | chromosome 9 open reading frame 64                                      | <i>C9orf64</i>                   | 84267  |
| 224962_at    | chromosome 9 open reading frame 69                                      | <i>C9orf69</i>                   | 90120  |
| 225919_s_at  | chromosome 9 open reading frame 72                                      | <i>C9orf72</i>                   | 203228 |
| 1553133_at   | chromosome 9 open reading frame 72                                      | <i>C9orf72</i>                   | 203228 |
| 1553134_s_at | chromosome 9 open reading frame 72                                      | <i>C9orf72</i>                   | 203228 |
| 219276_x_at  | chromosome 9 open reading frame 82                                      | <i>C9orf82</i>                   | 79886  |
| 235866_at    | chromosome 9 open reading frame 85                                      | <i>C9orf85</i>                   | 138241 |
| 223398_at    | chromosome 9 open reading frame 89                                      | <i>C9orf89</i>                   | 84270  |
| 221865_at    | chromosome 9 open reading frame 91                                      | <i>C9orf91</i>                   | 203197 |

|              |                                                                                   |                                    |             |
|--------------|-----------------------------------------------------------------------------------|------------------------------------|-------------|
| 1558082_at   | chromosome 9 open reading frame 93                                                | <i>C9orf93</i>                     | 203238      |
| 1562761_at   | chromosome 9 open reading frame 95                                                | <i>C9orf95</i>                     | 54981       |
| 1557666_s_at | chromosome 9 open reading frame 98                                                | <i>C9orf98</i>                     | 158067      |
| 205949_at    | carbonic anhydrase I                                                              | <i>CA1</i>                         | 759         |
| 205950_s_at  | carbonic anhydrase I                                                              | <i>CA1</i>                         | 759         |
| 206209_s_at  | carbonic anhydrase IV                                                             | <i>CA4</i>                         | 762         |
| 206208_at    | carbonic anhydrase IV                                                             | <i>CA4</i>                         | 762         |
| 225914_s_at  | calcium binding protein 39-like                                                   | <i>CAB39L</i>                      | 81617       |
| 218168_s_at  | chaperone, ABC1 activity of bc1 complex homolog (S. pombe)                        | <i>CABC1</i>                       | 56997       |
| 202624_s_at  | calcineurin binding protein 1                                                     | <i>CABIN1</i>                      | 23523       |
| 37652_at     | calcineurin binding protein 1                                                     | <i>CABIN1</i>                      | 23523       |
| 214933_at    | calcium channel, voltage-dependent, P/Q type, alpha 1A subunit                    | <i>CACNA1A</i>                     | 773         |
| 1552863_a_at | calcium channel, voltage-dependent, gamma subunit 6                               | <i>CACNG6</i>                      | 59285       |
| 224137_at    | calcium channel, voltage-dependent, gamma subunit 7                               | <i>CACNG7</i>                      | 59284       |
| 209031_at    | cell adhesion molecule 1                                                          | <i>CADM1</i>                       | 23705       |
| 209032_s_at  | cell adhesion molecule 1                                                          | <i>CADM1</i>                       | 23705       |
| 1552754_a_at | cell adhesion molecule 2                                                          | <i>CADM2</i>                       | 253559      |
| 1552752_a_at | cell adhesion molecule 2                                                          | <i>CADM2</i>                       | 253559      |
| 205626_s_at  | calbindin 1, 28kDa                                                                | <i>CALB1</i>                       | 793         |
| 205625_s_at  | calbindin 1, 28kDa                                                                | <i>CALB1</i>                       | 793         |
| 209002_s_at  | calcium binding and coiled-coil domain 1                                          | <i>CALCOCO1</i>                    | 57658       |
| 1560631_at   | calcium binding and coiled-coil domain 2                                          | <i>CALCOCO2</i>                    | 10241       |
| 210817_s_at  | calcium binding and coiled-coil domain 2                                          | <i>CALCOCO2</i>                    | 10241       |
| 206331_at    | calcitonin receptor-like                                                          | <i>CALCRL</i>                      | 10203       |
| 211985_s_at  | calmodulin 1 (phosphorylase kinase, delta)                                        | <i>CALM1</i>                       | 801 /// 805 |
| 211984_at    | calmodulin 1 (phosphorylase kinase, delta)                                        | <i>CALM1</i>                       | 801 /// 805 |
| 241619_at    | calmodulin 1 (phosphorylase kinase, delta)                                        | <i>CALM1</i>                       | 801 /// 805 |
| 200622_x_at  | calmodulin 3 (phosphorylase kinase, delta)                                        | <i>CALM3</i>                       | 801 /// 805 |
| 200623_s_at  | calmodulin 3 (phosphorylase kinase, delta)                                        | <i>CALM3</i>                       | 801 /// 805 |
| 64408_s_at   | calmodulin-like 4                                                                 | <i>CALML4</i>                      | 91860       |
| 221879_at    | calmodulin-like 4                                                                 | <i>CALML4</i>                      | 91860       |
| 214315_x_at  | calreticulin                                                                      | <i>CALR</i>                        | 811         |
| 212953_x_at  | calreticulin                                                                      | <i>CALR</i>                        | 811         |
| 226959_at    | calcium/calmodulin-dependent protein kinase ID                                    | <i>CAMK1D</i>                      | 283070      |
| 235626_at    | calcium/calmodulin-dependent protein kinase ID                                    | <i>CAMK1D</i>                      | 57118       |
| 226382_at    | calcium/calmodulin-dependent protein kinase ID /// hypothetical protein LOC283070 | <i>CAMK1D</i> /// <i>LOC283070</i> | 283070      |
| 217128_s_at  | calcium/calmodulin-dependent protein kinase IG                                    | <i>CAMK1G</i>                      | 57172       |
| 215161_at    | calcium/calmodulin-dependent protein kinase IG                                    | <i>CAMK1G</i>                      | 57172       |
| 231042_s_at  | Calcium/calmodulin-dependent protein kinase (CaM kinase) II delta                 | <i>CAMK2D</i>                      | 817         |
| 228555_at    | Calcium/calmodulin-dependent protein kinase (CaM kinase) II delta                 | <i>CAMK2D</i>                      | 817         |
| 231793_s_at  | calcium/calmodulin-dependent protein kinase (CaM kinase) II delta                 | <i>CAMK2D</i>                      | 817         |
| 218309_at    | calcium/calmodulin-dependent protein kinase II inhibitor 1                        | <i>CAMK2N1</i>                     | 55450       |
| 210787_s_at  | calcium/calmodulin-dependent protein kinase kinase 2, beta                        | <i>CAMKK2</i>                      | 10645       |
| 212252_at    | calcium/calmodulin-dependent protein kinase kinase 2, beta                        | <i>CAMKK2</i>                      | 10645       |
| 213812_s_at  | calcium/calmodulin-dependent protein kinase kinase 2, beta                        | <i>CAMKK2</i>                      | 10645       |
| 203538_at    | calcium modulating ligand                                                         | <i>CAMLG</i>                       | 819         |
| 210244_at    | cathelicidin antimicrobial peptide                                                | <i>CAMP</i>                        | 820         |
| 212712_at    | calmodulin regulated spectrin-associated protein 1                                | <i>CAMSAP1</i>                     | 157922      |
| 212765_at    | calmodulin regulated spectrin-associated protein 1-like 1                         | <i>CAMSAP1L1</i>                   | 23271       |
| 217196_s_at  | calmodulin regulated spectrin-associated protein 1-like 1                         | <i>CAMSAP1L1</i>                   | 23271       |
| 1555370_a_at | calmodulin binding transcription activator 1                                      | <i>CAMTA1</i>                      | 23261       |
| 239771_at    | cullin-associated and neddylation-dissociated 1                                   | <i>CAND1</i>                       | 55832       |
| 208838_at    | cullin-associated and neddylation-dissociated 1                                   | <i>CAND1</i>                       | 55832       |
| 46323_at     | calcium activated nucleotidase 1                                                  | <i>CANT1</i>                       | 124583      |
| 221732_at    | calcium activated nucleotidase 1                                                  | <i>CANT1</i>                       | 124583      |
| 1554327_a_at | calcium activated nucleotidase 1                                                  | <i>CANT1</i>                       | 124583      |
| 200068_s_at  | calnexin                                                                          | <i>CANX</i>                        | 821         |
| 238034_at    | calnexin                                                                          | <i>CANX</i>                        | 821         |
| 208853_s_at  | calnexin                                                                          | <i>CANX</i>                        | 821         |
| 208852_s_at  | calnexin                                                                          | <i>CANX</i>                        | 821         |
| 212551_at    | CAP, adenylate cyclase-associated protein, 2 (yeast)                              | <i>CAP2</i>                        | 10486       |
| 234709_at    | calpain 13                                                                        | <i>CAPN13</i>                      | 92291       |
| 208683_at    | calpain 2, (m/II) large subunit                                                   | <i>CAPN2</i>                       | 824         |

|             |                                                                                                                        |                          |               |
|-------------|------------------------------------------------------------------------------------------------------------------------|--------------------------|---------------|
| 214888_at   | calpain 2, (m/II) large subunit                                                                                        | <i>CAPN2</i>             | 824           |
| 210944_s_at | calpain 3, (p94)                                                                                                       | <i>CAPN3</i>             | 825           |
| 203357_s_at | calpain 7                                                                                                              | <i>CAPN7</i>             | 23473         |
| 203356_at   | calpain 7                                                                                                              | <i>CAPN7</i>             | 23473         |
| 210641_at   | calpain 9                                                                                                              | <i>CAPN9</i>             | 10753         |
| 226990_at   | cell cycle associated protein 1                                                                                        | <i>CAPRIN1</i>           | 4076          |
| 226285_at   | cell cycle associated protein 1                                                                                        | <i>CAPRIN1</i>           | 4076          |
| 200722_s_at | cell cycle associated protein 1                                                                                        | <i>CAPRIN1</i>           | 4076          |
| 218456_at   | caprin family member 2                                                                                                 | <i>CAPRIN2</i>           | 65981         |
| 224370_s_at | calcyphosine 2                                                                                                         | <i>CAPS2</i>             | 84698         |
| 201238_s_at | capping protein (actin filament) muscle Z-line, alpha 2                                                                | <i>CAPZA2</i>            | 830           |
| 224414_s_at | caspase recruitment domain family, member 6                                                                            | <i>CARD6</i>             | 84674         |
| 204950_at   | caspase recruitment domain family, member 8                                                                            | <i>CARD8</i>             | 22900         |
| 212971_at   | cysteinyI-tRNA synthetase                                                                                              | <i>CARS</i>              | 833           |
| 240983_s_at | cysteinyI-tRNA synthetase                                                                                              | <i>CARS</i>              | 833           |
| 218153_at   | cysteinyI-tRNA synthetase 2, mitochondrial (putative)                                                                  | <i>CARS2</i>             | 79587         |
| 207842_s_at | cancer susceptibility candidate 3                                                                                      | <i>CASC3</i>             | 22794         |
| 228323_at   | cancer susceptibility candidate 5                                                                                      | <i>CASC5</i>             | 57082         |
| 219342_at   | CAS1 domain containing 1                                                                                               | <i>CASD1</i>             | 64921         |
| 243500_at   | CAS1 domain containing 1                                                                                               | <i>CASD1</i>             | 64921         |
| 226032_at   | caspase 2, apoptosis-related cysteine peptidase (neural precursor cell expressed)                                      | <i>CASP2</i>             | 835           |
| 211464_x_at | caspase 6, apoptosis-related cysteine peptidase                                                                        | <i>CASP6</i>             | 839           |
| 213373_s_at | caspase 8, apoptosis-related cysteine peptidase                                                                        | <i>CASP8</i>             | 841           |
| 222201_s_at | CASP8 associated protein 2                                                                                             | <i>CASP8AP2</i>          | 9994          |
| 210775_x_at | caspase 9, apoptosis-related cysteine peptidase                                                                        | <i>CASP9</i>             | 842           |
| 207467_x_at | calpastatin                                                                                                            | <i>CAST</i>              | 831           |
| 208908_s_at | calpastatin                                                                                                            | <i>CAST</i>              | 831           |
| 212586_at   | calpastatin                                                                                                            | <i>CAST</i>              | 831           |
| 211922_s_at | catalase                                                                                                               | <i>CAT</i>               | 847           |
| 201432_at   | catalase                                                                                                               | <i>CAT</i>               | 847           |
| 238363_at   | Catalase                                                                                                               | <i>CAT</i>               | 847           |
| 217588_at   | cation channel, sperm associated 2 /// cation channel, sperm associated 2 pseudogene                                   | <i>CATSPER2 /// CATS</i> | 117155 /// 64 |
| 203323_at   | caveolin 2                                                                                                             | <i>CAV2</i>              | 858           |
| 203324_s_at | caveolin 2                                                                                                             | <i>CAV2</i>              | 858           |
| 238549_at   | core-binding factor, runt domain, alpha subunit 2; translocated to, 2                                                  | <i>CBFA2T2</i>           | 9139          |
| 209145_s_at | core-binding factor, runt domain, alpha subunit 2; translocated to, 2                                                  | <i>CBFA2T2</i>           | 9139          |
| 225231_at   | Cas-Br-M (murine) ecotropic retroviral transforming sequence                                                           | <i>CBL</i>               | 867           |
| 225234_at   | Cas-Br-M (murine) ecotropic retroviral transforming sequence                                                           | <i>CBL</i>               | 867           |
| 209682_at   | Cas-Br-M (murine) ecotropic retroviral transforming sequence b                                                         | <i>CBLB</i>              | 868           |
| 220018_at   | Cas-Br-M (murine) ecotropic retroviral transforming sequence-like 1                                                    | <i>CBLL1</i>             | 79872         |
| 213626_at   | carbonyl reductase 4                                                                                                   | <i>CBR4</i>              | 84869         |
| 201518_at   | chromobox homolog 1 (HP1 beta homolog Drosophila )                                                                     | <i>CBX1</i>              | 10951         |
| 201091_s_at | chromobox homolog 3 (HP1 gamma homolog, Drosophila) /// similar to chromobox homolog 3 (HP1 gamma homolog, Drosophila) | <i>CBX3 /// LOC65397</i> | 11335 /// 64  |
| 227558_at   | chromobox homolog 4 (Pc class homolog, Drosophila)                                                                     | <i>CBX4</i>              | 8535          |
| 225323_at   | coiled-coil and C2 domain containing 1B                                                                                | <i>CC2D1B</i>            | 200014        |
| 227748_at   | cysteine conjugate-beta lyase 2                                                                                        | <i>CCBL2</i>             | 56267         |
| 1554606_at  | coiled-coil domain containing 100                                                                                      | <i>CCDC100</i>           | 153241        |
| 226449_at   | coiled-coil domain containing 100                                                                                      | <i>CCDC100</i>           | 153241        |
| 48117_at    | coiled-coil domain containing 101                                                                                      | <i>CCDC101</i>           | 112869        |
| 221822_at   | coiled-coil domain containing 101                                                                                      | <i>CCDC101</i>           | 112869        |
| 224968_at   | coiled-coil domain containing 104                                                                                      | <i>CCDC104</i>           | 112942        |
| 229063_s_at | coiled-coil domain containing 107                                                                                      | <i>CCDC107</i>           | 203260        |
| 227157_at   | coiled-coil domain containing 111                                                                                      | <i>CCDC111</i>           | 201973        |
| 235208_at   | coiled-coil domain containing 112                                                                                      | <i>CCDC112</i>           | 153733        |
| 226011_at   | coiled-coil domain containing 12                                                                                       | <i>CCDC12</i>            | 151903        |
| 1553894_at  | coiled-coil domain containing 122                                                                                      | <i>CCDC122</i>           | 160857        |
| 229082_at   | coiled-coil domain containing 125                                                                                      | <i>CCDC125</i>           | 202243        |
| 1553955_at  | coiled-coil domain containing 128                                                                                      | <i>CCDC128</i>           | 129285        |
| 231653_at   | coiled-coil domain containing 129                                                                                      | <i>CCDC129</i>           | 223075        |
| 1553736_at  | coiled-coil domain containing 131                                                                                      | <i>CCDC131</i>           | 196441        |
| 226031_at   | coiled-coil domain containing 132                                                                                      | <i>CCDC132</i>           | 55610         |
| 232945_at   | Coiled-coil domain containing 139                                                                                      | <i>CCDC139</i>           | 150962        |
| 225017_at   | coiled-coil domain containing 14                                                                                       | <i>CCDC14</i>            | 64770         |



|              |                                                                                  |                                 |              |
|--------------|----------------------------------------------------------------------------------|---------------------------------|--------------|
| 219470_x_at  | cyclin J                                                                         | <i>CCNJ</i>                     | 54619        |
| 229091_s_at  | cyclin J                                                                         | <i>CCNJ</i>                     | 54619        |
| 225824_at    | cyclin K                                                                         | <i>CCNK</i>                     | 8812         |
| 241495_at    | cyclin L1                                                                        | <i>CCNL1</i>                    | 57018        |
| 220046_s_at  | cyclin L1                                                                        | <i>CCNL1</i>                    | 57018        |
| 1555411_a_at | cyclin L1                                                                        | <i>CCNL1</i>                    | 57018        |
| 225555_x_at  | Cyclin L2                                                                        | <i>CCNL2</i>                    | 54998        |
| 221427_s_at  | cyclin L2 /// similar to Cyclin-L2 (Paneth cell-enhanced expression protein)     | <i>CCNL2</i> /// <i>LOC7278</i> | 81669        |
| 214638_s_at  | cyclin T2                                                                        | <i>CCNT2</i>                    | 905          |
| 224651_at    | cyclin Y                                                                         | <i>CCNY</i>                     | 219771       |
| 224652_at    | cyclin Y                                                                         | <i>CCNY</i>                     | 219771       |
| 224647_at    | cyclin Y                                                                         | <i>CCNY</i>                     | 219771       |
| 224649_x_at  | cyclin Y                                                                         | <i>CCNY</i>                     | 219771       |
| 228810_at    | cyclin Y-like 1                                                                  | <i>CCNYL1</i>                   | 151195       |
| 214152_at    | cell cycle progression 1                                                         | <i>CCPG1</i>                    | 9236         |
| 222156_x_at  | cell cycle progression 1                                                         | <i>CCPG1</i>                    | 9236         |
| 221511_x_at  | cell cycle progression 1                                                         | <i>CCPG1</i>                    | 9236         |
| 214151_s_at  | cell cycle progression 1                                                         | <i>CCPG1</i>                    | 9236         |
| 221156_x_at  | cell cycle progression 1                                                         | <i>CCPG1</i>                    | 9236         |
| 205099_s_at  | chemokine (C-C motif) receptor 1                                                 | <i>CCR1</i>                     | 1230         |
| 205098_at    | chemokine (C-C motif) receptor 1                                                 | <i>CCR1</i>                     | 1230         |
| 206978_at    | chemokine (C-C motif) receptor 2 /// similar to C-C chemokine receptor type 2 (  | <i>CCR2</i> /// <i>LOC72925</i> | 1231 /// 729 |
| 208304_at    | chemokine (C-C motif) receptor 3                                                 | <i>CCR3</i>                     | 1232         |
| 206337_at    | chemokine (C-C motif) receptor 7                                                 | <i>CCR7</i>                     | 1236         |
| 220351_at    | chemokine (C-C motif) receptor-like 1                                            | <i>CCRL1</i>                    | 51554        |
| 211434_s_at  | chemokine (C-C motif) receptor-like 2 /// similar to chemokine (C-C motif) recep | <i>CCRL2</i> /// <i>LOC7278</i> | 727811 /// 9 |
| 203522_at    | copper chaperone for superoxide dismutase                                        | <i>CCS</i>                      | 9973         |
| 201947_s_at  | chaperonin containing TCP1, subunit 2 (beta)                                     | <i>CCT2</i>                     | 10576        |
| 201946_s_at  | chaperonin containing TCP1, subunit 2 (beta)                                     | <i>CCT2</i>                     | 10576        |
| 200910_at    | chaperonin containing TCP1, subunit 3 (gamma)                                    | <i>CCT3</i>                     | 7203         |
| 200877_at    | chaperonin containing TCP1, subunit 4 (delta)                                    | <i>CCT4</i>                     | 10575        |
| 201327_s_at  | chaperonin containing TCP1, subunit 6A (zeta 1)                                  | <i>CCT6A</i>                    | 908          |
| 227301_at    | chaperonin containing TCP1, subunit 6A (zeta 1) pseudogene 1                     | <i>CCT6AP1</i>                  | 643253 /// 6 |
| 229900_at    | CD109 molecule                                                                   | <i>CD109</i>                    | 135228       |
| 215049_x_at  | CD163 molecule                                                                   | <i>CD163</i>                    | 9332         |
| 208653_s_at  | CD164 molecule, sialomucin                                                       | <i>CD164</i>                    | 8763         |
| 205831_at    | CD2 molecule                                                                     | <i>CD2</i>                      | 914          |
| 1553395_a_at | CD200 receptor 1                                                                 | <i>CD200R1</i>                  | 131450       |
| 204581_at    | CD22 molecule /// myelin associated glycoprotein                                 | <i>CD22</i> /// <i>MAG</i>      | 933          |
| 217422_s_at  | CD22 molecule /// myelin associated glycoprotein                                 | <i>CD22</i> /// <i>MAG</i>      | 933          |
| 266_s_at     | CD24 molecule                                                                    | <i>CD24</i>                     | 100133941    |
| 216379_x_at  | CD24 molecule                                                                    | <i>CD24</i>                     | 100133941    |
| 208651_x_at  | CD24 molecule                                                                    | <i>CD24</i>                     | 100133941    |
| 209771_x_at  | CD24 molecule                                                                    | <i>CD24</i>                     | 100133941    |
| 209772_s_at  | CD24 molecule                                                                    | <i>CD24</i>                     | 100133941    |
| 223834_at    | CD274 molecule                                                                   | <i>CD274</i>                    | 29126        |
| 206545_at    | CD28 molecule                                                                    | <i>CD28</i>                     | 940          |
| 203593_at    | CD2-associated protein                                                           | <i>CD2AP</i>                    | 23607        |
| 202257_s_at  | CD2 (cytoplasmic tail) binding protein 2                                         | <i>CD2BP2</i>                   | 10421        |
| 209933_s_at  | CD300a molecule                                                                  | <i>CD300A</i>                   | 11314        |
| 217078_s_at  | CD300a molecule                                                                  | <i>CD300A</i>                   | 11314        |
| 1553043_a_at | CD300 molecule-like family member f                                              | <i>CD300LF</i>                  | 146722       |
| 203799_at    | CD302 molecule                                                                   | <i>CD302</i>                    | 9936         |
| 242197_x_at  | CD36 molecule (thrombospondin receptor)                                          | <i>CD36</i>                     | 948          |
| 228766_at    | CD36 molecule (thrombospondin receptor)                                          | <i>CD36</i>                     | 948          |
| 213539_at    | CD3d molecule, delta (CD3-TCR complex)                                           | <i>CD3D</i>                     | 915          |
| 205456_at    | CD3e molecule, epsilon (CD3-TCR complex)                                         | <i>CD3E</i>                     | 916          |
| 35150_at     | CD40 molecule, TNF receptor superfamily member 5                                 | <i>CD40</i>                     | 958          |
| 216056_at    | CD44 molecule (Indian blood group)                                               | <i>CD44</i>                     | 960          |
| 217523_at    | CD44 molecule (Indian blood group)                                               | <i>CD44</i>                     | 960          |
| 1565868_at   | CD44 molecule (Indian blood group)                                               | <i>CD44</i>                     | 960          |
| 210916_s_at  | CD44 molecule (Indian blood group)                                               | <i>CD44</i>                     | 960          |
| 212014_x_at  | CD44 molecule (Indian blood group)                                               | <i>CD44</i>                     | 960          |





|              |                                                                                  |                                 |              |
|--------------|----------------------------------------------------------------------------------|---------------------------------|--------------|
| 226056_at    | Cdc42 GTPase-activating protein                                                  | <i>CDGAP</i>                    | 57514        |
| 220115_s_at  | cadherin 10, type 2 (T2-cadherin)                                                | <i>CDH10</i>                    | 1008         |
| 206898_at    | cadherin 19, type 2                                                              | <i>CDH19</i>                    | 28513        |
| 1569679_at   | cadherin-like 22                                                                 | <i>CDH22</i>                    | 64405        |
| 224527_at    | cadherin-like 23                                                                 | <i>CDH23</i>                    | 64072        |
| 214803_at    | cadherin 6, type 2, K-cadherin (fetal kidney)                                    | <i>CDH6</i>                     | ---          |
| 217574_at    | cadherin 8, type 2                                                               | <i>CDH8</i>                     | 1006         |
| 207729_at    | cadherin 9, type 2 (T1-cadherin)                                                 | <i>CDH9</i>                     | 1007         |
| 201253_s_at  | CDP-diacylglycerol--inositol 3-phosphatidyltransferase (phosphatidylinositol syn | <i>CDIPT</i>                    | 10423        |
| 204252_at    | cyclin-dependent kinase 2                                                        | <i>CDK2</i>                     | 1017         |
| 211804_s_at  | cyclin-dependent kinase 2                                                        | <i>CDK2</i>                     | 1017         |
| 201938_at    | CDK2-associated protein 1                                                        | <i>CDK2AP1</i>                  | 8099         |
| 204995_at    | cyclin-dependent kinase 5, regulatory subunit 1 (p35)                            | <i>CDK5R1</i>                   | 8851         |
| 235287_at    | cyclin-dependent kinase 6                                                        | <i>CDK6</i>                     | 1021         |
| 224847_at    | cyclin-dependent kinase 6                                                        | <i>CDK6</i>                     | 1021         |
| 211297_s_at  | cyclin-dependent kinase 7 (MO15 homolog, Xenopus laevis, cdk-activating kinas    | <i>CDK7</i>                     | 1022         |
| 1553113_s_at | cyclin-dependent kinase 8                                                        | <i>CDK8</i>                     | 1024         |
| 236331_at    | cyclin-dependent kinase-like 2 (CDC2-related kinase)                             | <i>CDKL2</i>                    | 8999         |
| 202284_s_at  | cyclin-dependent kinase inhibitor 1A (p21, Cip1)                                 | <i>CDKN1A</i>                   | 1026         |
| 213183_s_at  | Cyclin-dependent kinase inhibitor 1C (p57, Kip2)                                 | <i>CDKN1C</i>                   | 1028         |
| 222063_s_at  | CDP-diacylglycerol synthase (phosphatidate cytidylyltransferase) 1               | <i>CDS1</i>                     | 1040         |
| 212864_at    | CDP-diacylglycerol synthase (phosphatidate cytidylyltransferase) 2               | <i>CDS2</i>                     | 8760         |
| 233630_at    | CDP-diacylglycerol synthase (phosphatidate cytidylyltransferase) 2               | <i>CDS2</i>                     | 8760         |
| 212862_at    | CDP-diacylglycerol synthase (phosphatidate cytidylyltransferase) 2               | <i>CDS2</i>                     | 8760         |
| 213554_s_at  | CDV3 homolog (mouse)                                                             | <i>CDV3</i>                     | 55573        |
| 207205_at    | carcinoembryonic antigen-related cell adhesion molecule 4                        | <i>CEACAM4</i>                  | 1089         |
| 201884_at    | carcinoembryonic antigen-related cell adhesion molecule 5                        | <i>CEACAM5</i>                  | 1048         |
| 203757_s_at  | carcinoembryonic antigen-related cell adhesion molecule 6 (non-specific cross r  | <i>CEACAM6</i>                  | 4680         |
| 211657_at    | carcinoembryonic antigen-related cell adhesion molecule 6 (non-specific cross r  | <i>CEACAM6</i>                  | 4680         |
| 206676_at    | carcinoembryonic antigen-related cell adhesion molecule 8                        | <i>CEACAM8</i>                  | 1088         |
| 204039_at    | CCAAT/enhancer binding protein (C/EBP), alpha                                    | <i>CEBPA</i>                    | 1050         |
| 212501_at    | CCAAT/enhancer binding protein (C/EBP), beta                                     | <i>CEBPB</i>                    | 1051         |
| 203973_s_at  | CCAAT/enhancer binding protein (C/EBP), delta                                    | <i>CEBPD</i>                    | 1052         |
| 213006_at    | CCAAT/enhancer binding protein (C/EBP), delta                                    | <i>CEBPD</i>                    | 1052         |
| 214523_at    | CCAAT/enhancer binding protein (C/EBP), epsilon                                  | <i>CEBPE</i>                    | 1053         |
| 223729_at    | cat eye syndrome chromosome region, candidate 2                                  | <i>CECR2</i>                    | 27443        |
| 218592_s_at  | cat eye syndrome chromosome region, candidate 5                                  | <i>CECR5</i>                    | 27440        |
| 204029_at    | cadherin, EGF LAG seven-pass G-type receptor 2 (flamingo homolog, Drosophila     | <i>CELSR2</i>                   | 1952         |
| 212437_at    | centromere protein B, 80kDa                                                      | <i>CENPB</i>                    | 1059         |
| 204739_at    | centromere protein C 1                                                           | <i>CENPC1</i>                   | 1060         |
| 223513_at    | centromere protein J                                                             | <i>CENPJ</i>                    | 55835        |
| 222848_at    | centromere protein K                                                             | <i>CENPK</i>                    | 64105        |
| 242207_at    | centromere protein P                                                             | <i>CENPP</i>                    | 100128361    |
| 219294_at    | centromere protein Q                                                             | <i>CENPQ</i>                    | 55166        |
| 90265_at     | centaurin, alpha 1                                                               | <i>CENTA1</i>                   | 11033        |
| 219358_s_at  | centaurin, alpha 2                                                               | <i>CENTA2</i>                   | 55803        |
| 205213_at    | centaurin, beta 1                                                                | <i>CENTB1</i>                   | 9744         |
| 212476_at    | centaurin, beta 2                                                                | <i>CENTB2</i>                   | 23527        |
| 1552472_a_at | centaurin, beta 2                                                                | <i>CENTB2</i>                   | 23527        |
| 214102_at    | centaurin, delta 1                                                               | <i>CENTD1</i>                   | 116984       |
| 34206_at     | centaurin, delta 2                                                               | <i>CENTD2</i>                   | 116985       |
| 212516_at    | centaurin, delta 2                                                               | <i>CENTD2</i>                   | 116985       |
| 225789_at    | centaurin, gamma 3                                                               | <i>CENTG3</i>                   | 116988       |
| 231299_at    | centaurin, gamma 3                                                               | <i>CENTG3</i>                   | 116988       |
| 242916_at    | centrosomal protein 110kDa                                                       | <i>CEP110</i>                   | 11064        |
| 205642_at    | centrosomal protein 110kDa                                                       | <i>CEP110</i>                   | 11064        |
| 215170_s_at  | centrosomal protein 152kDa                                                       | <i>CEP152</i>                   | 22995        |
| 204251_s_at  | centrosomal protein 164kDa                                                       | <i>CEP164</i>                   | 22897        |
| 1558953_s_at | centrosomal protein 164kDa                                                       | <i>CEP164</i>                   | 22897        |
| 212746_s_at  | centrosomal protein 170kDa                                                       | <i>CEP170</i>                   | 9859         |
| 1552717_s_at | centrosomal protein 170kDa /// centrosomal protein 170kDa-like                   | <i>CEP170</i> /// <i>CEP170</i> | 645455 /// 9 |
| 205250_s_at  | centrosomal protein 290kDa                                                       | <i>CEP290</i>                   | 80184        |
| 213165_at    | centrosomal protein 350kDa                                                       | <i>CEP350</i>                   | 9857         |

|              |                                                                     |                |        |
|--------------|---------------------------------------------------------------------|----------------|--------|
| 219242_at    | centrosomal protein 63kDa                                           | <i>CEP63</i>   | 80254  |
| 222151_s_at  | centrosomal protein 63kDa                                           | <i>CEP63</i>   | 80254  |
| 212677_s_at  | centrosomal protein 68kDa                                           | <i>CEP68</i>   | 23177  |
| 212675_s_at  | centrosomal protein 68kDa                                           | <i>CEP68</i>   | 23177  |
| 224150_s_at  | centrosomal protein 70kDa                                           | <i>CEP70</i>   | 80321  |
| 52285_f_at   | centrosomal protein 76kDa                                           | <i>CEP76</i>   | 79959  |
| 228774_at    | centrosomal protein 78kDa                                           | <i>CEP78</i>   | 84131  |
| 1561884_at   | choline/ethanolamine phosphotransferase 1                           | <i>CEPT1</i>   | 10390  |
| 219375_at    | choline/ethanolamine phosphotransferase 1                           | <i>CEPT1</i>   | 10390  |
| 218421_at    | ceramide kinase                                                     | <i>CERK</i>    | 64781  |
| 220335_x_at  | carboxylesterase 3 (brain)                                          | <i>CES3</i>    | 23491  |
| 209194_at    | centrin, EF-hand protein, 2                                         | <i>CETN2</i>   | 1069   |
| 209662_at    | centrin, EF-hand protein, 3 (CDC31 homolog, yeast)                  | <i>CETN3</i>   | 1070   |
| 210701_at    | craniofacial development protein 1                                  | <i>CFDP1</i>   | 10428  |
| 203166_at    | craniofacial development protein 1                                  | <i>CFDP1</i>   | 10428  |
| 236588_at    | Craniofacial development protein 1                                  | <i>CFDP1</i>   | 10428  |
| 206910_x_at  | complement factor H-related 2                                       | <i>CFHR2</i>   | 3080   |
| 233496_s_at  | cofilin 2 (muscle)                                                  | <i>CFL2</i>    | 1073   |
| 224352_s_at  | cofilin 2 (muscle)                                                  | <i>CFL2</i>    | 1073   |
| 208485_x_at  | CASP8 and FADD-like apoptosis regulator                             | <i>CFLAR</i>   | 8837   |
| 210563_x_at  | CASP8 and FADD-like apoptosis regulator                             | <i>CFLAR</i>   | 8837   |
| 210564_x_at  | CASP8 and FADD-like apoptosis regulator                             | <i>CFLAR</i>   | 8837   |
| 237367_x_at  | CASP8 and FADD-like apoptosis regulator                             | <i>CFLAR</i>   | 8837   |
| 214618_at    | CASP8 and FADD-like apoptosis regulator                             | <i>CFLAR</i>   | ---    |
| 214906_x_at  | hypothetical gene CG018                                             | <i>CG018</i>   | 90634  |
| 217972_at    | coiled-coil-helix-coiled-coil-helix domain containing 3             | <i>CHCHD3</i>  | 54927  |
| 229595_at    | coiled-coil-helix-coiled-coil-helix domain containing 4             | <i>CHCHD4</i>  | 131474 |
| 1562892_at   | Coiled-coil-helix-coiled-coil-helix domain containing 5             | <i>CHCHD5</i>  | 84269  |
| 218642_s_at  | coiled-coil-helix-coiled-coil-helix domain containing 7             | <i>CHCHD7</i>  | 79145  |
| 204258_at    | chromodomain helicase DNA binding protein 1                         | <i>CHD1</i>    | 1105   |
| 235791_x_at  | chromodomain helicase DNA binding protein 1                         | <i>CHD1</i>    | 1105   |
| 212539_at    | chromodomain helicase DNA binding protein 1-like                    | <i>CHD1L</i>   | 9557   |
| 238070_at    | Chromodomain helicase DNA binding protein 1-like                    | <i>CHD1L</i>   | 9557   |
| 203461_at    | chromodomain helicase DNA binding protein 2                         | <i>CHD2</i>    | 1106   |
| 228999_at    | chromodomain helicase DNA binding protein 2                         | <i>CHD2</i>    | 1106   |
| 243134_at    | Chromodomain helicase DNA binding protein 2                         | <i>CHD2</i>    | ---    |
| 225077_at    | chromodomain helicase DNA binding protein 2                         | <i>CHD2</i>    | 1106   |
| 225951_s_at  | Chromodomain helicase DNA binding protein 2                         | <i>CHD2</i>    | 1106   |
| 1554015_a_at | chromodomain helicase DNA binding protein 2                         | <i>CHD2</i>    | 1106   |
| 1554014_at   | chromodomain helicase DNA binding protein 2                         | <i>CHD2</i>    | 1106   |
| 244443_at    | Chromodomain helicase DNA binding protein 2                         | <i>CHD2</i>    | 1106   |
| 208806_at    | chromodomain helicase DNA binding protein 3                         | <i>CHD3</i>    | 1107   |
| 234681_s_at  | chromodomain helicase DNA binding protein 6                         | <i>CHD6</i>    | 84181  |
| 1559591_s_at | choline dehydrogenase                                               | <i>CHDH</i>    | 55349  |
| 205394_at    | CHK1 checkpoint homolog (S. pombe)                                  | <i>CHEK1</i>   | 1111   |
| 202230_s_at  | calcium homeostasis endoplasmic reticulum protein                   | <i>CHERP</i>   | 10523  |
| 218803_at    | checkpoint with forkhead and ring finger domains                    | <i>CHFR</i>    | 55743  |
| 223931_s_at  | checkpoint with forkhead and ring finger domains                    | <i>CHFR</i>    | 55743  |
| 223061_at    | chitinase domain containing 1                                       | <i>CHID1</i>   | 66005  |
| 204591_at    | cell adhesion molecule with homology to L1CAM (close homolog of L1) | <i>CHL1</i>    | 10752  |
| 226350_at    | choroideremia-like (Rab escort protein 2)                           | <i>CHML</i>    | 1122   |
| 218177_at    | chromatin modifying protein 1B                                      | <i>CHMP1B</i>  | 57132  |
| 202121_s_at  | chromatin modifying protein 2A                                      | <i>CHMP2A</i>  | 27243  |
| 202538_s_at  | chromatin modifying protein 2B                                      | <i>CHMP2B</i>  | 25978  |
| 202536_at    | chromatin modifying protein 2B                                      | <i>CHMP2B</i>  | 25978  |
| 202537_s_at  | chromatin modifying protein 2B                                      | <i>CHMP2B</i>  | 25978  |
| 218572_at    | chromatin modifying protein 4A                                      | <i>CHMP4A</i>  | 29082  |
| 218571_s_at  | chromatin modifying protein 4A                                      | <i>CHMP4A</i>  | 29082  |
| 225498_at    | chromatin modifying protein 4B                                      | <i>CHMP4B</i>  | 128866 |
| 225119_at    | chromatin modifying protein 4B                                      | <i>CHMP4B</i>  | 128866 |
| 219356_s_at  | chromatin modifying protein 5                                       | <i>CHMP5</i>   | 51510  |
| 1557769_at   | Chimerin (chimaerin) 2                                              | <i>CHN2</i>    | ---    |
| 218566_s_at  | cysteine and histidine-rich domain (CHORD)-containing 1             | <i>CHORDC1</i> | 26973  |

|              |                                                                                   |                          |              |
|--------------|-----------------------------------------------------------------------------------|--------------------------|--------------|
| 214665_s_at  | calcium binding protein P22                                                       | <i>CHP</i>               | 11261        |
| 207993_s_at  | calcium binding protein P22                                                       | <i>CHP</i>               | 11261        |
| 1559739_at   | Choline phosphotransferase 1                                                      | <i>CHPT1</i>             | 56994        |
| 226368_at    | Carbohydrate (chondroitin 4) sulfotransferase 11                                  | <i>CHST11</i>            | 50515        |
| 226372_at    | Carbohydrate (chondroitin 4) sulfotransferase 11                                  | <i>CHST11</i>            | 50515        |
| 219634_at    | carbohydrate (chondroitin 4) sulfotransferase 11                                  | <i>CHST11</i>            | 50515        |
| 218927_s_at  | carbohydrate (chondroitin 4) sulfotransferase 12                                  | <i>CHST12</i>            | 55501        |
| 222786_at    | carbohydrate (chondroitin 4) sulfotransferase 12                                  | <i>CHST12</i>            | 55501        |
| 239647_at    | carbohydrate (chondroitin 4) sulfotransferase 13                                  | <i>CHST13</i>            | 166012       |
| 226314_at    | carbohydrate (N-acetylgalactosamine 4-O) sulfotransferase 14                      | <i>CHST14</i>            | 113189       |
| 203921_at    | carbohydrate (N-acetylglucosamine-6-O) sulfotransferase 2                         | <i>CHST2</i>             | 9435         |
| 206756_at    | carbohydrate (N-acetylglucosamine 6-O) sulfotransferase 7                         | <i>CHST7</i>             | 56548        |
| 203044_at    | carbohydrate (chondroitin) synthase 1                                             | <i>CHSY1</i>             | 22856        |
| 233268_s_at  | churchill domain containing 1                                                     | <i>CHURC1</i>            | 91612        |
| 217501_at    | cytosolic iron-sulfur protein assembly 1 homolog (S. cerevisiae)                  | <i>CIAO1</i>             | 9391         |
| 201953_at    | calcium and integrin binding 1 (calmyrin)                                         | <i>CIB1</i>              | 10519        |
| 224914_s_at  | cytokine induced protein 29 kDa /// Dnal (Hsp40) homolog, subfamily C, memb       | <i>CIP29 /// DNAJC14</i> | 84324        |
| 209571_at    | CBF1 interacting corepressor                                                      | <i>CIR</i>               | 9541         |
| 226689_at    | CDGSH iron sulfur domain 2                                                        | <i>CISD2</i>             | 493856       |
| 226686_at    | CDGSH iron sulfur domain 2                                                        | <i>CISD2</i>             | 493856       |
| 209357_at    | Cbp/p300-interacting transactivator, with Glu/Asp-rich carboxy-terminal domai     | <i>CITED2</i>            | 10370        |
| 207980_s_at  | Cbp/p300-interacting transactivator, with Glu/Asp-rich carboxy-terminal domai     | <i>CITED2</i>            | 10370        |
| 218252_at    | cytoskeleton associated protein 2                                                 | <i>CKAP2</i>             | 26586        |
| 200998_s_at  | cytoskeleton-associated protein 4                                                 | <i>CKAP4</i>             | 10970        |
| 200999_s_at  | cytoskeleton-associated protein 4                                                 | <i>CKAP4</i>             | 10970        |
| 204170_s_at  | CDC28 protein kinase regulatory subunit 2                                         | <i>CKS2</i>              | 1164         |
| 212308_at    | cytoplasmic linker associated protein 2                                           | <i>CLASP2</i>            | 23122        |
| 212306_at    | cytoplasmic linker associated protein 2                                           | <i>CLASP2</i>            | 23122        |
| 206207_at    | Charcot-Leyden crystal protein                                                    | <i>CLC</i>               | 1178         |
| 206165_s_at  | chloride channel, calcium activated, family member 2                              | <i>CLCA2</i>             | 9635         |
| 201734_at    | Chloride channel 3                                                                | <i>CLCN3</i>             | 1182         |
| 206704_at    | chloride channel 5 (nephrolithiasis 2, X-linked, Dent disease)                    | <i>CLCN5</i>             | 1184         |
| 38069_at     | chloride channel 7                                                                | <i>CLCN7</i>             | 1186         |
| 209235_at    | chloride channel 7                                                                | <i>CLCN7</i>             | 1186         |
| 1554749_s_at | chloride channel Kb                                                               | <i>CLCNKB</i>            | 1188         |
| 205328_at    | claudin 10                                                                        | <i>CLDN10</i>            | 9071         |
| 214598_at    | claudin 8                                                                         | <i>CLDN8</i>             | 9073         |
| 1552398_a_at | C-type lectin domain family 12, member A                                          | <i>CLEC12A</i>           | 160364 /// 3 |
| 209732_at    | C-type lectin domain family 2, member B                                           | <i>CLEC2B</i>            | 9976         |
| 220132_s_at  | C-type lectin domain family 2, member D                                           | <i>CLEC2D</i>            | 29121        |
| 219859_at    | C-type lectin domain family 4, member E                                           | <i>CLEC4E</i>            | 26253        |
| 222934_s_at  | C-type lectin domain family 4, member E                                           | <i>CLEC4E</i>            | 26253        |
| 221698_s_at  | C-type lectin domain family 7, member A                                           | <i>CLEC7A</i>            | 64581        |
| 1555756_a_at | C-type lectin domain family 7, member A                                           | <i>CLEC7A</i>            | 64581        |
| 1554406_a_at | C-type lectin domain family 7, member A                                           | <i>CLEC7A</i>            | 64581        |
| 1555214_a_at | C-type lectin domain family 7, member A                                           | <i>CLEC7A</i>            | 64581        |
| 205830_at    | calmegin                                                                          | <i>CLGN</i>              | 1047         |
| 208659_at    | chloride intracellular channel 1                                                  | <i>CLIC1</i>             | 1192         |
| 201560_at    | chloride intracellular channel 4                                                  | <i>CLIC4</i>             | 25932        |
| 221881_s_at  | chloride intracellular channel 4                                                  | <i>CLIC4</i>             | 25932        |
| 201559_s_at  | chloride intracellular channel 4                                                  | <i>CLIC4</i>             | 25932        |
| 201975_at    | CAP-GLY domain containing linker protein 1                                        | <i>CLIP1</i>             | 6249         |
| 219944_at    | CAP-GLY domain containing linker protein family, member 4                         | <i>CLIP4</i>             | 79745        |
| 226425_at    | CAP-GLY domain containing linker protein family, member 4                         | <i>CLIP4</i>             | 79745        |
| 214683_s_at  | CDC-like kinase 1                                                                 | <i>CLK1</i>              | 1195         |
| 203229_s_at  | CDC-like kinase 2                                                                 | <i>CLK2</i>              | 1196         |
| 202140_s_at  | CDC-like kinase 3                                                                 | <i>CLK3</i>              | 1198         |
| 225759_x_at  | calmin (calponin-like, transmembrane)                                             | <i>CLMN</i>              | 79789        |
| 210859_x_at  | ceroid-lipofuscinosis, neuronal 3, juvenile (Batten, Spielmeyer-Vogt disease)     | <i>CLN3</i>              | 1201         |
| 209275_s_at  | ceroid-lipofuscinosis, neuronal 3, juvenile (Batten, Spielmeyer-Vogt disease)     | <i>CLN3</i>              | 1201         |
| 1567079_at   | ceroid-lipofuscinosis, neuronal 6, late infantile, variant                        | <i>CLN6</i>              | 54982        |
| 223912_s_at  | ceroid-lipofuscinosis, neuronal 8 (epilepsy, progressive with mental retardation) | <i>CLN8</i>              | 2055         |
| 222874_s_at  | ceroid-lipofuscinosis, neuronal 8 (epilepsy, progressive with mental retardation) | <i>CLN8</i>              | 2055         |

|              |                                                                                                                                |        |
|--------------|--------------------------------------------------------------------------------------------------------------------------------|--------|
| 229958_at    | ceroid-lipofuscinosis, neuronal 8 (epilepsy, progressive with mental retardation) <i>CLN8</i>                                  | 2055   |
| 219341_at    | ceroid-lipofuscinosis, neuronal 8 (epilepsy, progressive with mental retardation) <i>CLN8</i>                                  | 2055   |
| 209143_s_at  | chloride channel, nucleotide-sensitive, 1A <i>CLNS1A</i>                                                                       | 1207   |
| 204980_at    | clock homolog (mouse) <i>CLOCK</i>                                                                                             | 9575   |
| 223020_at    | CLPTM1-like <i>CLPTM1L</i>                                                                                                     | 81037  |
| 204809_at    | ClpX caseinolytic peptidase X homolog (E. coli) <i>CLPX</i>                                                                    | 10845  |
| 1560434_x_at | clathrin, light chain (Lca) <i>CLTA</i>                                                                                        | 1211   |
| 204050_s_at  | clathrin, light chain (Lca) <i>CLTA</i>                                                                                        | 1211   |
| 200960_x_at  | clathrin, light chain (Lca) <i>CLTA</i>                                                                                        | 1211   |
| 216295_s_at  | clathrin, light chain (Lca) <i>CLTA</i>                                                                                        | 1211   |
| 210498_at    | clathrin, heavy chain (Hc) <i>CLTC</i>                                                                                         | 1213   |
| 200614_at    | clathrin, heavy chain (Hc) <i>CLTC</i>                                                                                         | 1213   |
| 205518_s_at  | cytidine monophosphate-N-acetylneuraminic acid hydroxylase (CMP-N-acetylne <i>CMAH</i>                                         | 8418   |
| 241065_x_at  | Cytidine monophosphate N-acetylneuraminic acid synthetase <i>CMAS</i>                                                          | 55907  |
| 234981_x_at  | carboxymethylenebutenolidase homolog (Pseudomonas) <i>CMBL</i>                                                                 | 134147 |
| 225009_at    | CKLF-like MARVEL transmembrane domain containing 4 <i>CMTM4</i>                                                                | 146223 |
| 217947_at    | CKLF-like MARVEL transmembrane domain containing 6 <i>CMTM6</i>                                                                | 54918  |
| 223047_at    | CKLF-like MARVEL transmembrane domain containing 6 <i>CMTM6</i>                                                                | 54918  |
| 1552587_at   | cyclic nucleotide binding domain containing 1 <i>CNBD1</i>                                                                     | 168975 |
| 206158_s_at  | CCHC-type zinc finger, nucleic acid binding protein <i>CNBP</i>                                                                | 7555   |
| 217752_s_at  | CNDP dipeptidase 2 (metallopeptidase M20 family) <i>CNDP2</i>                                                                  | 55748  |
| 206417_at    | cyclic nucleotide gated channel alpha 1 <i>CNGA1</i>                                                                           | 1259   |
| 201653_at    | cornichon homolog (Drosophila) <i>CNIH</i>                                                                                     | 10175  |
| 228306_at    | cornichon homolog 4 (Drosophila) <i>CNIH4</i>                                                                                  | 29097  |
| 229116_at    | connector enhancer of kinase suppressor of Ras 2 <i>CNKSR2</i>                                                                 | 22866  |
| 220739_s_at  | cyclin M3 <i>CNNM3</i>                                                                                                         | 26505  |
| 218900_at    | cyclin M4 <i>CNNM4</i>                                                                                                         | 26504  |
| 1554052_at   | CCR4-NOT transcription complex, subunit 1 <i>CNOT1</i>                                                                         | 23019  |
| 222182_s_at  | CCR4-NOT transcription complex, subunit 2 <i>CNOT2</i>                                                                         | 4848   |
| 203239_s_at  | CCR4-NOT transcription complex, subunit 3 <i>CNOT3</i>                                                                         | 4849   |
| 211141_s_at  | CCR4-NOT transcription complex, subunit 3 <i>CNOT3</i>                                                                         | 4849   |
| 229143_at    | CCR4-NOT transcription complex, subunit 3 <i>CNOT3</i>                                                                         | 4849   |
| 217970_s_at  | CCR4-NOT transcription complex, subunit 6 <i>CNOT6</i>                                                                         | 57472  |
| 227119_at    | CCR4-NOT transcription complex, subunit 6-like <i>CNOT6L</i>                                                                   | 246175 |
| 202162_s_at  | CCR4-NOT transcription complex, subunit 8 <i>CNOT8</i>                                                                         | 9337   |
| 202164_s_at  | CCR4-NOT transcription complex, subunit 8 <i>CNOT8</i>                                                                         | 9337   |
| 202163_s_at  | CCR4-NOT transcription complex, subunit 8 <i>CNOT8</i>                                                                         | 9337   |
| 206586_at    | cannabinoid receptor 2 (macrophage) <i>CNR2</i>                                                                                | 1269   |
| 1554784_at   | contactin 1 <i>CNTN1</i>                                                                                                       | 1272   |
| 227209_at    | Contactin 1 <i>CNTN1</i>                                                                                                       | 1272   |
| 211203_s_at  | contactin 1 <i>CNTN1</i>                                                                                                       | 1272   |
| 233202_at    | contactin associated protein-like 3 <i>CNTNAP3</i>                                                                             | 79937  |
| 223796_at    | contactin associated protein-like 3 /// contactin associated protein-like 3B /// si <i>CNTNAP3</i> /// <i>CNTN389722</i> /// € |        |
| 201913_s_at  | Coenzyme A synthase <i>COASY</i>                                                                                               | 80347  |
| 203642_s_at  | COBL-like 1 <i>COBLL1</i>                                                                                                      | 22837  |
| 231813_s_at  | component of oligomeric golgi complex 1 <i>COG1</i>                                                                            | 9382   |
| 203073_at    | component of oligomeric golgi complex 2 <i>COG2</i>                                                                            | 22796  |
| 225769_at    | component of oligomeric golgi complex 6 <i>COG6</i>                                                                            | 57511  |
| 216993_s_at  | collagen, type XI, alpha 2 <i>COL11A2</i>                                                                                      | 1302   |
| 216865_at    | collagen, type XIV, alpha 1 (undulin) <i>COL14A1</i>                                                                           | 7373   |
| 203477_at    | collagen, type XV, alpha 1 <i>COL15A1</i>                                                                                      | 1306   |
| 209082_s_at  | collagen, type XVIII, alpha 1 <i>COL18A1</i>                                                                                   | 80781  |
| 202403_s_at  | collagen, type I, alpha 2 <i>COL1A2</i>                                                                                        | 1278   |
| 215076_s_at  | collagen, type III, alpha 1 (Ehlers-Danlos syndrome type IV, autosomal dominant) <i>COL3A1</i>                                 | 1281   |
| 211161_s_at  | collagen, type III, alpha 1 (Ehlers-Danlos syndrome type IV, autosomal dominant) <i>COL3A1</i>                                 | 1281   |
| 232458_at    | Collagen, type III, alpha 1 (Ehlers-Danlos syndrome type IV, autosomal dominan) <i>COL3A1</i>                                  | 1281   |
| 223466_x_at  | collagen, type IV, alpha 3 (Goodpasture antigen) binding protein <i>COL4A3BP</i>                                               | 10087  |
| 219625_s_at  | collagen, type IV, alpha 3 (Goodpasture antigen) binding protein <i>COL4A3BP</i>                                               | 10087  |
| 223465_at    | collagen, type IV, alpha 3 (Goodpasture antigen) binding protein <i>COL4A3BP</i>                                               | 10087  |
| 221729_at    | collagen, type V, alpha 2 <i>COL5A2</i>                                                                                        | 1290   |
| 213622_at    | collagen, type IX, alpha 2 <i>COL9A2</i>                                                                                       | 1298   |
| 221019_s_at  | collectin sub-family member 12 <i>COLEC12</i>                                                                                  | 81035  |
| 226024_at    | copper metabolism (Murr1) domain containing 1 <i>COMMD1</i>                                                                    | 150684 |

|              |                                                                                     |         |              |
|--------------|-------------------------------------------------------------------------------------|---------|--------------|
| 222637_at    | COMM domain containing 10                                                           | COMMD10 | 51397        |
| 223491_at    | COMM domain containing 2                                                            | COMMD2  | 51122        |
| 209132_s_at  | COMM domain containing 4                                                            | COMMD4  | 54939        |
| 206441_s_at  | COMM domain containing 4                                                            | COMMD4  | 54939        |
| 224815_at    | COMM domain containing 7                                                            | COMMD7  | 149951       |
| 208818_s_at  | catechol-O-methyltransferase                                                        | COMT    | 1312         |
| 208684_at    | coatomer protein complex, subunit alpha                                             | COPA    | 1314         |
| 201359_at    | coatomer protein complex, subunit beta 1                                            | COPB1   | 1315         |
| 201358_s_at  | coatomer protein complex, subunit beta 1                                            | COPB1   | 1315         |
| 201098_at    | coatomer protein complex, subunit beta 2 (beta prime)                               | COPB2   | 9276         |
| 201264_at    | coatomer protein complex, subunit epsilon                                           | COPE    | 11316        |
| 202467_s_at  | COP9 constitutive photomorphogenic homolog subunit 2 (Arabidopsis)                  | COPS2   | 9318         |
| 214260_at    | COP9 constitutive photomorphogenic homolog subunit 8 (Arabidopsis)                  | COPS8   | 10920        |
| 217726_at    | coatomer protein complex, subunit zeta 1                                            | COPZ1   | 22818        |
| 219397_at    | coenzyme Q10 homolog B (S. cerevisiae)                                              | COQ10B  | 80219        |
| 210820_x_at  | coenzyme Q7 homolog, ubiquinone (yeast)                                             | COQ7    | 10229        |
| 239260_at    | corin, serine peptidase                                                             | CORIN   | 10699        |
| 239261_s_at  | corin, serine peptidase                                                             | CORIN   | 10699        |
| 220356_at    | corin, serine peptidase                                                             | CORIN   | 10699        |
| 209083_at    | coronin, actin binding protein, 1A                                                  | CORO1A  | 11151        |
| 222409_at    | coronin, actin binding protein, 1C                                                  | CORO1C  | 23603        |
| 221676_s_at  | coronin, actin binding protein, 1C                                                  | CORO1C  | 23603        |
| 211727_s_at  | COX11 homolog, cytochrome c oxidase assembly protein (yeast)                        | COX11   | 1353         |
| 235533_at    | COX19 cytochrome c oxidase assembly homolog (S. cerevisiae)                         | COX19   | 90639        |
| 202698_x_at  | cytochrome c oxidase subunit IV isoform 1                                           | COX4I1  | 1327         |
| 200086_s_at  | cytochrome c oxidase subunit IV isoform 1                                           | COX4I1  | 1327         |
| 213758_at    | cytochrome c oxidase subunit IV isoform 1                                           | COX4I1  | 1327         |
| 200925_at    | cytochrome c oxidase subunit VIa polypeptide 1                                      | COX6A1  | 1337         |
| 201754_at    | cytochrome c oxidase subunit VIc                                                    | COX6C   | 1345         |
| 201256_at    | cytochrome c oxidase subunit VIIa polypeptide 2 like                                | COX7A2L | 9167         |
| 202110_at    | cytochrome c oxidase subunit VIIb                                                   | COX7B   | 1349         |
| 227253_at    | ceruloplasmin (ferroxidase)                                                         | CP      | 1356         |
| 201941_at    | carboxypeptidase D                                                                  | CPD     | 1362         |
| 201940_at    | carboxypeptidase D                                                                  | CPD     | 1362         |
| 201943_s_at  | carboxypeptidase D                                                                  | CPD     | 1362         |
| 201942_s_at  | carboxypeptidase D                                                                  | CPD     | 1362         |
| 235462_at    | Cytoplasmic polyadenylation element binding protein 2                               | CPEB2   | 132864       |
| 1555250_a_at | cytoplasmic polyadenylation element binding protein 3                               | CPEB3   | 22849        |
| 205773_at    | cytoplasmic polyadenylation element binding protein 3                               | CPEB3   | 22849        |
| 224829_at    | cytoplasmic polyadenylation element binding protein 4                               | CPEB4   | 80315        |
| 235019_at    | carboxypeptidase M                                                                  | CPM     | 1368         |
| 225129_at    | copine II                                                                           | CPNE2   | 221184       |
| 228365_at    | copine VIII                                                                         | CPNE8   | 144402       |
| 204920_at    | carbamoyl-phosphate synthetase 1, mitochondrial                                     | CPS1    | 1373         |
| 225986_x_at  | cleavage and polyadenylation specific factor 2, 100kDa                              | CPSF2   | 53981        |
| 225082_at    | cleavage and polyadenylation specific factor 3, 73kDa                               | CPSF3   | 51692        |
| 224312_x_at  | cleavage and polyadenylation specific factor 3-like                                 | CPSF3L  | 54973        |
| 233563_s_at  | cleavage and polyadenylation specific factor 3-like                                 | CPSF3L  | 54973        |
| 233625_x_at  | cleavage and polyadenylation specific factor 3-like                                 | CPSF3L  | 54973        |
| 217994_x_at  | cleavage and polyadenylation specific factor 3-like                                 | CPSF3L  | 54973        |
| 206688_s_at  | cleavage and polyadenylation specific factor 4, 30kDa                               | CPSF4   | 10898        |
| 204264_at    | carnitine palmitoyltransferase II                                                   | CPT2    | 1376         |
| 217239_x_at  | Immunoglobulin heavy chain, partial, clone VH3-7 /// Carboxypeptidase, vitellogenin | CPVL    | ---          |
| 206244_at    | complement component (3b/4b) receptor 1 (Knops blood group)                         | CR1     | 1378         |
| 244313_at    | complement component (3b/4b) receptor 1 (Knops blood group)                         | CR1     | 1378         |
| 1563897_at   | Cellular retinoic acid binding protein 1                                            | CRABP1  | 1381         |
| 225172_at    | Crm, cramped-like (Drosophila)                                                      | CRAMP1L | 57585 /// 90 |
| 214513_s_at  | cAMP responsive element binding protein 1                                           | CREB1   | 1385         |
| 204312_x_at  | cAMP responsive element binding protein 1                                           | CREB1   | 1385         |
| 204314_s_at  | cAMP responsive element binding protein 1                                           | CREB1   | 1385         |
| 204313_s_at  | cAMP responsive element binding protein 1                                           | CREB1   | 1385         |
| 209432_s_at  | cAMP responsive element binding protein 3                                           | CREB3   | 10488        |
| 229228_at    | cAMP responsive element binding protein 5                                           | CREB5   | 9586         |

|              |                                                                                   |                                   |              |
|--------------|-----------------------------------------------------------------------------------|-----------------------------------|--------------|
| 205931_s_at  | cAMP responsive element binding protein 5                                         | <i>CREB5</i>                      | 9586         |
| 202160_at    | CREB binding protein (Rubinstein-Taybi syndrome)                                  | <i>CREBBP</i>                     | 1387         |
| 211808_s_at  | CREB binding protein (Rubinstein-Taybi syndrome)                                  | <i>CREBBP</i>                     | 1387         |
| 201990_s_at  | cAMP responsive element binding protein-like 2                                    | <i>CREBL2</i>                     | 1389         |
| 225595_at    | CREB/ATF bZIP transcription factor                                                | <i>CREBZF</i>                     | 58487        |
| 225594_at    | CREB/ATF bZIP transcription factor                                                | <i>CREBZF</i>                     | 58487        |
| 201200_at    | cellular repressor of E1A-stimulated genes 1                                      | <i>CREG1</i>                      | 8804         |
| 207630_s_at  | cAMP responsive element modulator                                                 | <i>CREM</i>                       | 1390         |
| 230511_at    | cAMP responsive element modulator                                                 | <i>CREM</i>                       | 1390         |
| 209967_s_at  | cAMP responsive element modulator                                                 | <i>CREM</i>                       | 1390         |
| 202552_s_at  | cysteine rich transmembrane BMP regulator 1 (chordin-like)                        | <i>CRIM1</i>                      | 51232        |
| 228496_s_at  | Cysteine rich transmembrane BMP regulator 1 (chordin-like)                        | <i>CRIM1</i>                      | 51232        |
| 202551_s_at  | cysteine rich transmembrane BMP regulator 1 (chordin-like)                        | <i>CRIM1</i>                      | 51232        |
| 227942_s_at  | cysteine-rich PDZ-binding protein                                                 | <i>CRIPT</i>                      | 9419         |
| 216314_at    | cysteine-rich secretory protein 1                                                 | <i>CRISP1</i>                     | 167          |
| 207802_at    | cysteine-rich secretory protein 3                                                 | <i>CRISP3</i>                     | 10321        |
| 223475_at    | cysteine-rich secretory protein LCCL domain containing 1                          | <i>CRISPLD1</i>                   | 83690        |
| 202224_at    | v-crk sarcoma virus CT10 oncogene homolog (avian)                                 | <i>CRK</i>                        | 1398         |
| 202225_at    | v-crk sarcoma virus CT10 oncogene homolog (avian)                                 | <i>CRK</i>                        | ---          |
| 202226_s_at  | v-crk sarcoma virus CT10 oncogene homolog (avian)                                 | <i>CRK</i>                        | 1398         |
| 212180_at    | v-crk sarcoma virus CT10 oncogene homolog (avian)-like                            | <i>CRKL</i>                       | 1399         |
| 206184_at    | v-crk sarcoma virus CT10 oncogene homolog (avian)-like                            | <i>CRKL</i>                       | 1399         |
| 211038_s_at  | ciliary rootlet coiled-coil, rootletin-like 1                                     | <i>CROCCL1</i>                    | 84809        |
| 204573_at    | carnitine O-octanoyltransferase                                                   | <i>CROT</i>                       | 54677        |
| 221988_at    | Cofactor required for Sp1 transcriptional activation, subunit 7, 70kDa            | <i>CRSP7</i>                      | 79086        |
| 1555889_a_at | cartilage associated protein                                                      | <i>CRTAP</i>                      | 10491        |
| 201380_at    | cartilage associated protein                                                      | <i>CRTAP</i>                      | 10491        |
| 226307_at    | CREB regulated transcription coactivator 2                                        | <i>CRTC2</i>                      | 200186       |
| 218648_at    | CREB regulated transcription coactivator 3                                        | <i>CRTC3</i>                      | 64784        |
| 209674_at    | cryptochrome 1 (photolyase-like)                                                  | <i>CRY1</i>                       | 1407         |
| 1552347_at   | crystallin, zeta (quinone reductase)-like 1                                       | <i>CRYZL1</i>                     | 9946         |
| 1554767_s_at | crystallin, zeta (quinone reductase)-like 1                                       | <i>CRYZL1</i>                     | 9946         |
| 201161_s_at  | cold shock domain protein A                                                       | <i>CSDA</i>                       | 8531         |
| 219939_s_at  | cold shock domain containing E1, RNA-binding                                      | <i>CSDE1</i>                      | 7812         |
| 222975_s_at  | cold shock domain containing E1, RNA-binding                                      | <i>CSDE1</i>                      | 7812         |
| 203104_at    | colony stimulating factor 1 receptor, formerly McDonough feline sarcoma viral (   | <i>CSF1R</i>                      | 1436         |
| 1553297_a_at | colony stimulating factor 3 receptor (granulocyte)                                | <i>CSF3R</i>                      | 1441         |
| 203591_s_at  | colony stimulating factor 3 receptor (granulocyte)                                | <i>CSF3R</i>                      | 1441         |
| 221799_at    | chondroitin sulfate glucuronyltransferase                                         | <i>CSG1cA-T</i>                   | 54480        |
| 55093_at     | chondroitin sulfate glucuronyltransferase                                         | <i>CSG1cA-T</i>                   | 54480        |
| 1570169_at   | CUB and Sushi multiple domains 2                                                  | <i>CSMD2</i>                      | 114784       |
| 1553080_at   | casein alpha s2-like A                                                            | <i>CSN1S2A</i>                    | 286828       |
| 207951_at    | casein beta                                                                       | <i>CSN2</i>                       | 1447         |
| 240221_at    | Casein kinase 1, alpha 1                                                          | <i>CSNK1A1</i>                    | 1452         |
| 213086_s_at  | casein kinase 1, alpha 1                                                          | <i>CSNK1A1</i>                    | 1452         |
| 243338_at    | Casein kinase 1, alpha 1                                                          | <i>CSNK1A1</i>                    | ---          |
| 208867_s_at  | casein kinase 1, alpha 1                                                          | <i>CSNK1A1</i>                    | 1452         |
| 1556006_s_at | Casein kinase 1, alpha 1                                                          | <i>CSNK1A1</i>                    | 1452         |
| 213860_x_at  | casein kinase 1, alpha 1                                                          | <i>CSNK1A1</i>                    | 1452         |
| 208865_at    | casein kinase 1, alpha 1                                                          | <i>CSNK1A1</i>                    | 1452         |
| 1556007_s_at | Casein kinase 1, alpha 1                                                          | <i>CSNK1A1</i>                    | ---          |
| 206562_s_at  | casein kinase 1, alpha 1                                                          | <i>CSNK1A1</i>                    | 1452         |
| 207945_s_at  | casein kinase 1, delta                                                            | <i>CSNK1D</i>                     | 1453         |
| 227767_at    | casein kinase 1, gamma 3                                                          | <i>CSNK1G3</i>                    | 1456         |
| 212073_at    | casein kinase 2, alpha 1 polypeptide /// casein kinase 2, alpha 1 polypeptide pse | <i>CSNK2A1</i> /// <i>CSNK2A1</i> | 1457 /// 283 |
| 201390_s_at  | casein kinase 2, beta polypeptide                                                 | <i>CSNK2B</i>                     | 1460 /// 584 |
| 227105_at    | centrosome and spindle pole associated protein 1                                  | <i>CSPP1</i>                      | 79848        |
| 207030_s_at  | cysteine and glycine-rich protein 2                                               | <i>CSRP2</i>                      | 1466         |
| 228543_at    | CSRP2 binding protein                                                             | <i>CSRP2BP</i>                    | 57325        |
| 210140_at    | cystatin F (leukocystatin)                                                        | <i>CST7</i>                       | 8530         |
| 204971_at    | cystatin A (stefin A)                                                             | <i>CSTA</i>                       | 1475         |
| 201201_at    | cystatin B (stefin B)                                                             | <i>CSTB</i>                       | 1476         |
| 202190_at    | cleavage stimulation factor, 3' pre-RNA, subunit 1, 50kDa                         | <i>CSTF1</i>                      | 1477         |

|              |                                                                                   |                                 |                   |
|--------------|-----------------------------------------------------------------------------------|---------------------------------|-------------------|
| 238821_at    | Cleavage stimulation factor, 3' pre-RNA, subunit 2, 64kDa                         | <i>CSTF2</i>                    | 1478              |
| 212905_at    | cleavage stimulation factor, 3' pre-RNA, subunit 2, 64kDa, tau variant            | <i>CSTF2T</i>                   | 23283             |
| 229665_at    | cleavage stimulation factor, 3' pre-RNA, subunit 3, 77kDa                         | <i>CSTF3</i>                    | 1479              |
| 229666_s_at  | cleavage stimulation factor, 3' pre-RNA, subunit 3, 77kDa                         | <i>CSTF3</i>                    | 1479              |
| 203947_at    | cleavage stimulation factor, 3' pre-RNA, subunit 3, 77kDa                         | <i>CSTF3</i>                    | 1479              |
| 220957_at    | cutaneous T-cell lymphoma-associated antigen 1                                    | <i>CTAGE1</i>                   | 64693             |
| 204055_s_at  | CTAGE family, member 5                                                            | <i>CTAGE5</i>                   | 4253              |
| 1557714_at   | C-terminal binding protein 1                                                      | <i>CTBP1</i>                    | 1487              |
| 218923_at    | chitinase, di-N-acetyl-                                                           | <i>CTBS</i>                     | 1486              |
| 218924_s_at  | chitinase, di-N-acetyl-                                                           | <i>CTBS</i>                     | 1486              |
| 1552368_at   | CCCTC-binding factor (zinc finger protein)-like                                   | <i>CTCFL</i>                    | 140690            |
| 205035_at    | CTD (carboxy-terminal domain, RNA polymerase II, polypeptide A) phosphatase       | <i>CTDP1</i>                    | 9150              |
| 224732_at    | chromosome transmission fidelity factor 8 homolog (S. cerevisiae)                 | <i>CTF8</i>                     | 54921             |
| 1565620_at   | Centaurin, gamma-like family, member 1                                            | <i>CTGLF1</i>                   | 119016            |
| 221971_x_at  | centaurin, gamma-like family, member 1 /// centaurin, gamma-like family, member 1 | <i>CTGLF1</i> /// <i>CTGLF2</i> | 119016 /// 119016 |
| 221850_x_at  | centaurin, gamma-like family, member 1 /// KIAA1975 protein similar to MRIP2      | <i>CTGLF1</i> /// <i>CTGLF3</i> | 119016 /// 119016 |
| 217127_at    | cystathionase (cystathionine gamma-lyase)                                         | <i>CTH</i>                      | 1491              |
| 231794_at    | cytotoxic T-lymphocyte-associated protein 4                                       | <i>CTLA4</i>                    | 1493              |
| 200764_s_at  | catenin (cadherin-associated protein), alpha 1, 102kDa                            | <i>CTNNA1</i>                   | 1495              |
| 210844_x_at  | catenin (cadherin-associated protein), alpha 1, 102kDa                            | <i>CTNNA1</i>                   | 1495              |
| 200765_x_at  | catenin (cadherin-associated protein), alpha 1, 102kDa                            | <i>CTNNA1</i>                   | 1495              |
| 1558214_s_at | catenin (cadherin-associated protein), alpha 1, 102kDa                            | <i>CTNNA1</i>                   | 1495              |
| 205373_at    | catenin (cadherin-associated protein), alpha 2                                    | <i>CTNNA2</i>                   | 1496              |
| 223679_at    | catenin (cadherin-associated protein), beta 1, 88kDa                              | <i>CTNNB1</i>                   | 1499              |
| 202060_at    | Ctr9, Paf1/RNA polymerase II complex component, homolog (S. cerevisiae)           | <i>CTR9</i>                     | 9646              |
| 214411_x_at  | chymotrypsinogen B2                                                               | <i>CTRB2</i>                    | 440387            |
| 206297_at    | chymotrypsin C (caldecrin)                                                        | <i>CTRC</i>                     | 11330             |
| 200661_at    | cathepsin A                                                                       | <i>CTSA</i>                     | 5476              |
| 231234_at    | cathepsin C                                                                       | <i>CTSC</i>                     | 1075              |
| 201487_at    | cathepsin C                                                                       | <i>CTSC</i>                     | 1075              |
| 225646_at    | cathepsin C                                                                       | <i>CTSC</i>                     | 1075              |
| 225647_s_at  | cathepsin C                                                                       | <i>CTSC</i>                     | 1075              |
| 200766_at    | cathepsin D                                                                       | <i>CTSD</i>                     | 1509              |
| 227863_at    | cathepsin D                                                                       | <i>CTSD</i>                     | 1509              |
| 202295_s_at  | cathepsin H                                                                       | <i>CTSH</i>                     | 1512              |
| 203758_at    | cathepsin O                                                                       | <i>CTSO</i>                     | 1519              |
| 232617_at    | cathepsin S                                                                       | <i>CTSS</i>                     | 1520              |
| 202901_x_at  | cathepsin S                                                                       | <i>CTSS</i>                     | 1520              |
| 202902_s_at  | cathepsin S                                                                       | <i>CTSS</i>                     | 1520              |
| 240868_at    | CTTNBP2 N-terminal like                                                           | <i>CTTNBP2NL</i>                | 100129406         |
| 227178_at    | CUG triplet repeat, RNA binding protein 2                                         | <i>CUGBP2</i>                   | 10659             |
| 1554569_a_at | CUG triplet repeat, RNA binding protein 2                                         | <i>CUGBP2</i>                   | 10659             |
| 242268_at    | CUG triplet repeat, RNA binding protein 2                                         | <i>CUGBP2</i>                   | 10659             |
| 201370_s_at  | cullin 3                                                                          | <i>CUL3</i>                     | 8452              |
| 201424_s_at  | cullin 4A                                                                         | <i>CUL4A</i>                    | 8451              |
| 210257_x_at  | cullin 4B                                                                         | <i>CUL4B</i>                    | 8450              |
| 203533_s_at  | cullin 5                                                                          | <i>CUL5</i>                     | 8065              |
| 203531_at    | cullin 5                                                                          | <i>CUL5</i>                     | 8065              |
| 205898_at    | chemokine (C-X3-C motif) receptor 1                                               | <i>CX3CR1</i>                   | 1524              |
| 1568934_at   | chemokine (C-X3-C motif) receptor 1                                               | <i>CX3CR1</i>                   | 1524              |
| 203917_at    | coxsackie virus and adenovirus receptor                                           | <i>CXADR</i>                    | 1525              |
| 204470_at    | chemokine (C-X-C motif) ligand 1 (melanoma growth stimulating activity, alpha)    | <i>CXCL1</i>                    | 2919              |
| 223454_at    | chemokine (C-X-C motif) ligand 16                                                 | <i>CXCL16</i>                   | 58191             |
| 209774_x_at  | chemokine (C-X-C motif) ligand 2                                                  | <i>CXCL2</i>                    | 2920              |
| 1569203_at   | chemokine (C-X-C motif) ligand 2                                                  | <i>CXCL2</i>                    | 2920              |
| 206336_at    | chemokine (C-X-C motif) ligand 6 (granulocyte chemotactic protein 2)              | <i>CXCL6</i>                    | 6372              |
| 203915_at    | chemokine (C-X-C motif) ligand 9                                                  | <i>CXCL9</i>                    | 4283              |
| 211919_s_at  | chemokine (C-X-C motif) receptor 4                                                | <i>CXCR4</i>                    | 7852              |
| 209201_x_at  | chemokine (C-X-C motif) receptor 4                                                | <i>CXCR4</i>                    | 7852              |
| 232746_at    | Chemokine (C-X-C motif) receptor 7                                                | <i>CXCR7</i>                    | 57007             |
| 228752_at    | chromosome X open reading frame 10                                                | <i>CXorf10</i>                  | 63035             |
| 227520_at    | chromosome X open reading frame 15                                                | <i>CXorf15</i>                  | 55787             |
| 239034_at    | chromosome X open reading frame 24                                                | <i>CXorf24</i>                  | 203414            |

|              |                                                                                |                                  |              |
|--------------|--------------------------------------------------------------------------------|----------------------------------|--------------|
| 224177_s_at  | chromosome X open reading frame 26                                             | <i>CXorf26</i>                   | 51260        |
| 223294_at    | chromosome X open reading frame 26                                             | <i>CXorf26</i>                   | 51260        |
| 230532_at    | chromosome X open reading frame 38                                             | <i>CXorf38</i>                   | 159013       |
| 213315_x_at  | chromosome X open reading frame 40A                                            | <i>CXorf40A</i>                  | 91966        |
| 214112_s_at  | chromosome X open reading frame 40A /// chromosome X open reading frame        | <i>CXorf40A</i> /// <i>CXorf</i> | 541578 /// 5 |
| 212961_x_at  | chromosome X open reading frame 40B                                            | <i>CXorf40B</i>                  | 541578 /// 5 |
| 1552607_at   | chromosome X open reading frame 52                                             | <i>CXorf52</i>                   | 100132967,   |
| 1553466_at   | chromosome X open reading frame 59                                             | <i>CXorf59</i>                   | 286464       |
| 229774_at    | CXXC finger 4                                                                  | <i>CXXC4</i>                     | 80319        |
| 228906_at    | CXXC finger 6                                                                  | <i>CXXC6</i>                     | 80312        |
| 217200_x_at  | cytochrome b-561                                                               | <i>CYB561</i>                    | 1534         |
| 207986_x_at  | cytochrome b-561                                                               | <i>CYB561</i>                    | 1534         |
| 209164_s_at  | cytochrome b-561                                                               | <i>CYB561</i>                    | 1534         |
| 210816_s_at  | cytochrome b-561                                                               | <i>CYB561</i>                    | 1534         |
| 209163_at    | cytochrome b-561                                                               | <i>CYB561</i>                    | 1534         |
| 201634_s_at  | cytochrome b5 type B (outer mitochondrial membrane)                            | <i>CYB5B</i>                     | 80777        |
| 226833_at    | cytochrome b5 domain containing 1                                              | <i>CYB5D1</i>                    | 124637       |
| 202263_at    | cytochrome b5 reductase 1                                                      | <i>CYB5R1</i>                    | 51706        |
| 219079_at    | cytochrome b5 reductase 4                                                      | <i>CYB5R4</i>                    | 51167        |
| 222453_at    | cytochrome b reductase 1                                                       | <i>CYBRD1</i>                    | 79901        |
| 217889_s_at  | cytochrome b reductase 1                                                       | <i>CYBRD1</i>                    | 79901        |
| 201066_at    | cytochrome c-1                                                                 | <i>CYC1</i>                      | 1537         |
| 215785_s_at  | cytoplasmic FMR1 interacting protein 2                                         | <i>CYFIP2</i>                    | 26999        |
| 1570410_at   | cytoglobin                                                                     | <i>CYGB</i>                      | 114757       |
| 213072_at    | cysteine/histidine-rich 1                                                      | <i>CYHR1</i>                     | 50626        |
| 216809_at    | cylicin, basic protein of sperm head cytoskeleton 1                            | <i>CYLC1</i>                     | 1538         |
| 216778_s_at  | cylicin, basic protein of sperm head cytoskeleton 1                            | <i>CYLC1</i>                     | 1538         |
| 207780_at    | cylicin, basic protein of sperm head cytoskeleton 2                            | <i>CYLC2</i>                     | 1539         |
| 236694_at    | chromosome Y open reading frame 15A                                            | <i>CYorf15A</i>                  | 246126       |
| 223645_s_at  | chromosome Y open reading frame 15B                                            | <i>CYorf15B</i>                  | 84663        |
| 240863_at    | cytochrome P450, family 19, subfamily A, polypeptide 1                         | <i>CYP19A1</i>                   | 1588         |
| 207608_x_at  | cytochrome P450, family 1, subfamily A, polypeptide 2                          | <i>CYP1A2</i>                    | 1544         |
| 202435_s_at  | cytochrome P450, family 1, subfamily B, polypeptide 1                          | <i>CYP1B1</i>                    | 1545         |
| 203979_at    | cytochrome P450, family 27, subfamily A, polypeptide 1                         | <i>CYP27A1</i>                   | 1593         |
| 217558_at    | cytochrome P450, family 2, subfamily C, polypeptide 9                          | <i>CYP2C9</i>                    | 1559         |
| 214421_x_at  | cytochrome P450, family 2, subfamily C, polypeptide 9                          | <i>CYP2C9</i>                    | 1559         |
| 244407_at    | cytochrome P450, family 39, subfamily A, polypeptide 1                         | <i>CYP39A1</i>                   | 51302        |
| 217319_x_at  | cytochrome P450, family 4, subfamily A, polypeptide 22                         | <i>CYP4A22</i>                   | 284541       |
| 206515_at    | cytochrome P450, family 4, subfamily F, polypeptide 3                          | <i>CYP4F3</i>                    | 4051         |
| 226745_at    | cytochrome P450, family 4, subfamily V, polypeptide 2                          | <i>CYP4V2</i>                    | 285440       |
| 227702_at    | cytochrome P450, family 4, subfamily X, polypeptide 1                          | <i>CYP4X1</i>                    | 260293       |
| 237395_at    | cytochrome P450, family 4, subfamily Z, polypeptide 1                          | <i>CYP4Z1</i>                    | 199974       |
| 232494_at    | cytochrome P450, family 8, subfamily B, polypeptide 1                          | <i>CYP8B1</i>                    | 1582         |
| 230866_at    | cysteinyl leukotriene receptor 1                                               | <i>CYSLTR1</i>                   | 10800        |
| 231747_at    | cysteinyl leukotriene receptor 1                                               | <i>CYSLTR1</i>                   | 10800        |
| 216288_at    | cysteinyl leukotriene receptor 1                                               | <i>CYSLTR1</i>                   | 10800        |
| 1559471_s_at | D21S2088E                                                                      | <i>D21S2088E</i>                 | 266917       |
| 216060_s_at  | dishevelled associated activator of morphogenesis 1                            | <i>DAAM1</i>                     | 23002        |
| 228915_at    | dachshund homolog 1 (Drosophila)                                               | <i>DACH1</i>                     | 1602         |
| 205472_s_at  | dachshund homolog 1 (Drosophila)                                               | <i>DACH1</i>                     | 1602         |
| 205471_s_at  | dachshund homolog 1 (Drosophila)                                               | <i>DACH1</i>                     | 1602         |
| 200046_at    | defender against cell death 1                                                  | <i>DAD1</i>                      | 1603         |
| 1562772_a_at | DAN domain family, member 5                                                    | <i>DAND5</i>                     | 199699       |
| 201095_at    | death-associated protein                                                       | <i>DAP</i>                       | 1611         |
| 208822_s_at  | death associated protein 3                                                     | <i>DAP3</i>                      | 7818         |
| 215184_at    | death-associated protein kinase 2                                              | <i>DAPK2</i>                     | 23604        |
| 206324_s_at  | death-associated protein kinase 2                                              | <i>DAPK2</i>                     | 23604        |
| 203890_s_at  | death-associated protein kinase 3                                              | <i>DAPK3</i>                     | 1613         |
| 236707_at    | dual adaptor of phosphotyrosine and 3-phosphoinositides                        | <i>DAPP1</i>                     | 27071        |
| 201624_at    | aspartyl-tRNA synthetase                                                       | <i>DARS</i>                      | 1615         |
| 201623_s_at  | aspartyl-tRNA synthetase                                                       | <i>DARS</i>                      | 1615         |
| 216038_x_at  | death-associated protein 6                                                     | <i>DAXX</i>                      | 1616         |
| 216922_x_at  | deleted in azoospermia 1 /// deleted in azoospermia 3 /// deleted in azoosperm | <i>DAZ1</i> /// <i>DAZ2</i> ///  | 1617 /// 570 |



|              |                                                                                       |                   |              |
|--------------|---------------------------------------------------------------------------------------|-------------------|--------------|
| 207909_x_at  | deleted in azoospermia 1 /// deleted in azoospermia 3 /// deleted in azoosperm        | DAZ1 /// DAZ2 /// | 1617 /// 570 |
| 214334_x_at  | DAZ associated protein 2                                                              | DAZAP2            | 9802         |
| 212595_s_at  | DAZ associated protein 2                                                              | DAZAP2            | 9802         |
| 205818_at    | deleted in bladder cancer 1                                                           | DBC1              | 1620         |
| 204244_s_at  | DBF4 homolog ( <i>S. cerevisiae</i> )                                                 | DBF4              | 10926        |
| 234295_at    | debranching enzyme homolog 1 ( <i>S. cerevisiae</i> )                                 | DBR1              | 51163        |
| 219149_x_at  | debranching enzyme homolog 1 ( <i>S. cerevisiae</i> )                                 | DBR1              | 51163        |
| 231919_at    | dihydrolipoamide branched chain transacylase E2                                       | DBT               | 1629         |
| 205371_s_at  | dihydrolipoamide branched chain transacylase E2                                       | DBT               | 1629         |
| 224911_s_at  | discoidin, CUB and LCCL domain containing 2                                           | DCBLD2            | 131566       |
| 213873_at    | discoidin, CUB and LCCL domain containing 2                                           | DCBLD2            | 131566       |
| 229800_at    | Doublecortin-like kinase 1                                                            | DCLK1             | 9201         |
| 242927_at    | DNA cross-link repair 1C (PSO2 homolog, <i>S. cerevisiae</i> )                        | DCLRE1C           | 64421        |
| 235478_at    | DNA cross-link repair 1C (PSO2 homolog, <i>S. cerevisiae</i> )                        | DCLRE1C           | 64421        |
| 240556_at    | Decorin                                                                               | DCN               | 1634         |
| 222678_s_at  | DCN1, defective in cullin neddylation 1, domain containing 1 ( <i>S. cerevisiae</i> ) | DCUN1D1           | 54165        |
| 212855_at    | DCN1, defective in cullin neddylation 1, domain containing 4 ( <i>S. cerevisiae</i> ) | DCUN1D4           | 23142        |
| 212851_at    | DCN1, defective in cullin neddylation 1, domain containing 4 ( <i>S. cerevisiae</i> ) | DCUN1D4           | 23142        |
| 223151_at    | DCN1, defective in cullin neddylation 1, domain containing 5 ( <i>S. cerevisiae</i> ) | DCUN1D5           | 84259        |
| 217973_at    | dicarbonyl/L-xylulose reductase                                                       | DCXR              | 51181        |
| 224796_at    | development and differentiation enhancing factor 1                                    | DDEF1             | 50807        |
| 221039_s_at  | development and differentiation enhancing factor 1                                    | DDEF1             | 50807        |
| 224790_at    | development and differentiation enhancing factor 1                                    | DDEF1             | 50807        |
| 224791_at    | development and differentiation enhancing factor 1                                    | DDEF1             | 50807        |
| 236533_at    | development and differentiation enhancing factor 1                                    | DDEF1             | 50807        |
| 209383_at    | DNA-damage-inducible transcript 3                                                     | DDIT3             | 1649         |
| 202887_s_at  | DNA-damage-inducible transcript 4                                                     | DDIT4             | 54541        |
| 208675_s_at  | dolichyl-diphosphooligosaccharide-protein glycosyltransferase                         | DDOST             | 1650         |
| 208674_x_at  | dolichyl-diphosphooligosaccharide-protein glycosyltransferase                         | DDOST             | 1650         |
| 227561_at    | Discoidin domain receptor family, member 2                                            | DDR2              | 4921         |
| 202929_s_at  | D-dopachrome tautomerase                                                              | DDT               | 1652         |
| 201241_at    | DEAD (Asp-Glu-Ala-Asp) box polypeptide 1                                              | DDX1              | 1653         |
| 204977_at    | DEAD (Asp-Glu-Ala-Asp) box polypeptide 10                                             | DDX10             | 1662         |
| 213378_s_at  | DEAD/H (Asp-Glu-Ala-Asp/His) box polypeptide 11 (CHL1-like helicase homolog,          | DDX11 /// DDX12 / | 1663 /// 440 |
| 213998_s_at  | DEAD (Asp-Glu-Ala-Asp) box polypeptide 17                                             | DDX17             | 10521        |
| 208895_s_at  | DEAD (Asp-Glu-Ala-Asp) box polypeptide 18                                             | DDX18             | 8886         |
| 208896_at    | DEAD (Asp-Glu-Ala-Asp) box polypeptide 18                                             | DDX18             | 8886         |
| 205763_s_at  | DEAD (Asp-Glu-Ala-Asp) box polypeptide 18                                             | DDX18             | 8886         |
| 208897_s_at  | DEAD (Asp-Glu-Ala-Asp) box polypeptide 18                                             | DDX18             | 8886         |
| 224654_at    | DEAD (Asp-Glu-Ala-Asp) box polypeptide 21                                             | DDX21             | 9188         |
| 208152_s_at  | DEAD (Asp-Glu-Ala-Asp) box polypeptide 21                                             | DDX21             | 9188         |
| 200694_s_at  | DEAD (Asp-Glu-Ala-Asp) box polypeptide 24                                             | DDX24             | 57062        |
| 40255_at     | DEAD (Asp-Glu-Ala-Asp) box polypeptide 28                                             | DDX28             | 55794        |
| 203785_s_at  | DEAD (Asp-Glu-Ala-Asp) box polypeptide 28                                             | DDX28             | 55794        |
| 1553181_at   | DEAD (Asp-Glu-Ala-Asp) box polypeptide 31                                             | DDX31             | 64794        |
| 201211_s_at  | DEAD (Asp-Glu-Ala-Asp) box polypeptide 3, X-linked                                    | DDX3X             | 1654         |
| 201210_at    | DEAD (Asp-Glu-Ala-Asp) box polypeptide 3, X-linked                                    | DDX3X             | 1654         |
| 212515_s_at  | DEAD (Asp-Glu-Ala-Asp) box polypeptide 3, X-linked                                    | DDX3X             | 1654         |
| 212514_x_at  | DEAD (Asp-Glu-Ala-Asp) box polypeptide 3, X-linked                                    | DDX3X             | 1654         |
| 217840_at    | DEAD (Asp-Glu-Ala-Asp) box polypeptide 41                                             | DDX41             | 51428        |
| 228039_at    | DEAD (Asp-Glu-Ala-Asp) box polypeptide 46                                             | DDX46             | 9879         |
| 31807_at     | DEAD (Asp-Glu-Ala-Asp) box polypeptide 49                                             | DDX49             | 54555        |
| 221699_s_at  | DEAD (Asp-Glu-Ala-Asp) box polypeptide 50                                             | DDX50             | 79009        |
| 1568815_a_at | DEAD (Asp-Glu-Ala-Asp) box polypeptide 50                                             | DDX50             | 79009        |
| 212834_at    | DEAD (Asp-Glu-Ala-Asp) box polypeptide 52                                             | DDX52             | 11056        |
| 242961_x_at  | DEAD (Asp-Glu-Ala-Asp) box polypeptide 58                                             | DDX58             | 23586        |
| 222793_at    | DEAD (Asp-Glu-Ala-Asp) box polypeptide 58                                             | DDX58             | 23586        |
| 218943_s_at  | DEAD (Asp-Glu-Ala-Asp) box polypeptide 58                                             | DDX58             | 23586        |
| 228385_at    | DEAD (Asp-Glu-Ala-Asp) box polypeptide 59                                             | DDX59             | 83479        |
| 223662_x_at  | DEAD (Asp-Glu-Ala-Asp) box polypeptide 59                                             | DDX59             | 83479        |
| 225434_at    | death effector domain containing 2                                                    | DEDD2             | 162989       |
| 226659_at    | differentially expressed in FDCP 6 homolog (mouse)                                    | DEF6              | 50619        |
| 221293_s_at  | differentially expressed in FDCP 6 homolog (mouse)                                    | DEF6              | 50619        |

|              |                                                                                |                       |                   |
|--------------|--------------------------------------------------------------------------------|-----------------------|-------------------|
| 225637_at    | differentially expressed in FDCP 8 homolog (mouse)                             | DEF8                  | 54849             |
| 205033_s_at  | defensin, alpha 1 /// defensin, alpha 3, neutrophil-specific                   | DEFA1 /// DEFA3       | 1667 /// 1667     |
| 207269_at    | defensin, alpha 4, corticostatin                                               | DEFA4                 | 1669              |
| 207529_at    | defensin, alpha 5, Paneth cell-specific                                        | DEFA5                 | 1670              |
| 1563450_at   | defensin, beta 107A /// defensin, beta 107B                                    | DEFB107A /// DEFB107B | 245910 /// 245910 |
| 207431_s_at  | degenerative spermatocyte homolog 1, lipid desaturase (Drosophila)             | DEGS1                 | 8560              |
| 219763_at    | DENN/MADD domain containing 1A                                                 | DENND1A               | 57706             |
| 1557309_at   | DENN/MADD domain containing 1B                                                 | DENND1B               | 163486            |
| 1552835_at   | DENN/MADD domain containing 1B                                                 | DENND1B               | 163486            |
| 212975_at    | DENN/MADD domain containing 3                                                  | DENND3                | 22898             |
| 212974_at    | DENN/MADD domain containing 3                                                  | DENND3                | 22898             |
| 1554352_s_at | DENN/MADD domain containing 4A                                                 | DENND4A               | 10260             |
| 214787_at    | DENN/MADD domain containing 4A                                                 | DENND4A               | 10260             |
| 202860_at    | DENN/MADD domain containing 4B                                                 | DENND4B               | 9909              |
| 234968_at    | DENN/MADD domain containing 4C                                                 | DENND4C               | 55667             |
| 234915_s_at  | density-regulated protein                                                      | DENR                  | 8562              |
| 235545_at    | DEP domain containing 1                                                        | DEPDC1                | 55635             |
| 222958_s_at  | DEP domain containing 1                                                        | DEPDC1                | 55635             |
| 232278_s_at  | DEP domain containing 1                                                        | DEPDC1                | 55635             |
| 220295_x_at  | DEP domain containing 1 /// similar to DEP domain containing 1                 | DEPDC1 /// LOC731018  | 55635             |
| 222543_at    | Der1-like domain family, member 1                                              | DERL1                 | 79139             |
| 218172_s_at  | Der1-like domain family, member 1                                              | DERL1                 | 79139             |
| 219402_s_at  | Der1-like domain family, member 1                                              | DERL1                 | 79139             |
| 218333_at    | Der1-like domain family, member 2                                              | DERL2                 | 51009             |
| 216947_at    | desmin                                                                         | DES                   | 1674              |
| 226116_at    | DNA fragmentation factor, 45kDa, alpha polypeptide                             | DFFA                  | ---               |
| 47553_at     | deafness, autosomal recessive 31                                               | DFNB31                | 25861             |
| 221887_s_at  | deafness, autosomal recessive 31                                               | DFNB31                | 25861             |
| 214198_s_at  | DiGeorge syndrome critical region gene 2                                       | DGCR2                 | 9993              |
| 208024_s_at  | DiGeorge syndrome critical region gene 6 /// DiGeorge syndrome critical region | DGCR6 /// DGCR6L      | 8214 /// 8214     |
| 211272_s_at  | diacylglycerol kinase, alpha 80kDa                                             | DGKA                  | 1606              |
| 208072_s_at  | diacylglycerol kinase, delta 130kDa                                            | DGKD                  | 8527              |
| 1553300_a_at | diacylglycerol kinase, eta                                                     | DGKH                  | 160851            |
| 203816_at    | deoxyguanosine kinase                                                          | DGUOK                 | 1716              |
| 202534_x_at  | dihydrofolate reductase                                                        | DHFR                  | 1719              |
| 48808_at     | dihydrofolate reductase                                                        | DHFR                  | 1719              |
| 202532_s_at  | dihydrofolate reductase                                                        | DHFR                  | 1719              |
| 202802_at    | deoxyhypusine synthase                                                         | DHPS                  | 1725              |
| 207831_x_at  | deoxyhypusine synthase                                                         | DHPS                  | 1725              |
| 210788_s_at  | dehydrogenase/reductase (SDR family) member 7                                  | DHRS7                 | 51635             |
| 219799_s_at  | dehydrogenase/reductase (SDR family) member 9                                  | DHRS9                 | 10170             |
| 224009_x_at  | dehydrogenase/reductase (SDR family) member 9                                  | DHRS9                 | 10170             |
| 223952_x_at  | dehydrogenase/reductase (SDR family) member 9                                  | DHRS9                 | 10170             |
| 225503_at    | dehydrogenase/reductase (SDR family) X-linked                                  | DHRSX                 | 207063            |
| 209916_at    | dehydrogenase E1 and transketolase domain containing 1                         | DHTKD1                | 55526             |
| 227094_at    | dehydrogenase E1 and transketolase domain containing 1                         | DHTKD1                | 55526             |
| 212649_at    | DEAH (Asp-Glu-Ala-His) box polypeptide 29                                      | DHX29                 | 54505             |
| 230871_at    | DEAH (Asp-Glu-Ala-His) box polypeptide 30                                      | DHX30                 | 22907             |
| 1556144_at   | DEAH (Asp-Glu-Ala-His) box polypeptide 30                                      | DHX30                 | 22907             |
| 218277_s_at  | DEAH (Asp-Glu-Ala-His) box polypeptide 40                                      | DHX40                 | 79665             |
| 222574_s_at  | DEAH (Asp-Glu-Ala-His) box polypeptide 40                                      | DHX40                 | 79665             |
| 219350_s_at  | diablo homolog (Drosophila)                                                    | DIABLO                | 56616             |
| 209190_s_at  | diaphanous homolog 1 (Drosophila)                                              | DIAPH1                | 1729              |
| 229097_at    | diaphanous homolog 3 (Drosophila)                                              | DIAPH3                | 81624             |
| 212888_at    | Dicer1, Dcr-1 homolog (Drosophila)                                             | DICER1                | 23405             |
| 206061_s_at  | Dicer1, Dcr-1 homolog (Drosophila)                                             | DICER1                | 23405             |
| 213229_at    | Dicer1, Dcr-1 homolog (Drosophila)                                             | DICER1                | 23405             |
| 218325_s_at  | death inducer-obliterator 1                                                    | DIDO1                 | 11083             |
| 227335_at    | death inducer-obliterator 1                                                    | DIDO1                 | 11083             |
| 231240_at    | deiiodinase, iodothyronine, type II                                            | DIO2                  | 1734              |
| 215529_x_at  | DIP2 disco-interacting protein 2 homolog A (Drosophila)                        | DIP2A                 | 23181             |
| 242970_at    | DIP2 disco-interacting protein 2 homolog B (Drosophila)                        | DIP2B                 | 57609             |
| 226026_at    | disrupted in renal carcinoma 2                                                 | DIRC2                 | 84925             |

|              |                                                                                    |                                |             |
|--------------|------------------------------------------------------------------------------------|--------------------------------|-------------|
| 218362_s_at  | DIS3 mitotic control homolog (S. cerevisiae)                                       | <i>DIS3</i>                    | 22894       |
| 214194_at    | DIS3 mitotic control homolog (S. cerevisiae)                                       | <i>DIS3</i>                    | 22894       |
| 235005_at    | DIS3 mitotic control homolog (S. cerevisiae)-like                                  | <i>DIS3L</i>                   | 115752      |
| 238602_at    | DIS3 mitotic control homolog (S. cerevisiae)-like 2                                | <i>DIS3L2</i>                  | 129563      |
| 230006_s_at  | hypothetical protein DKFZp313A2432                                                 | <i>DKFZp313A2432</i>           | 258010      |
| 230005_at    | hypothetical protein DKFZp313A2432                                                 | <i>DKFZp313A2432</i>           | 258010      |
| 233092_s_at  | DKFZP434B061 protein                                                               | <i>DKFZP434B061</i>            | 26080       |
| 231886_at    | similar to hypothetical protein LOC284701                                          | <i>DKFZP434B2016</i>           | 642780      |
| 224123_at    | hypothetical protein DKFZp434F142                                                  | <i>DKFZp434F142</i>            | 84214       |
| 225680_at    | hypothetical protein DKFZp434K1815                                                 | <i>DKFZp434K1815</i>           | 222229      |
| 1557633_at   | hypothetical locus DKFZp434K191                                                    | <i>DKFZp434K191</i>            | 29797       |
| 206819_at    | POM121-like protein                                                                | <i>DKFZP434P211</i>            | 29774       |
| 231540_at    | hypothetical protein DKFZp451M2119                                                 | <i>DKFZp451M2119</i>           | 100130691   |
| 1558534_at   | hypothetical gene LOC283846                                                        | <i>DKFZp547E087</i>            | 283846 ///  |
| 216028_at    | DKFZP564C152 protein                                                               | <i>DKFZP564C152</i>            | ---         |
| 204687_at    | DKFZP564O0823 protein                                                              | <i>DKFZP564O0823</i>           | 25849       |
| 213546_at    | hypothetical protein DKFZp586I1420                                                 | <i>DKFZp586I1420</i>           | 222161      |
| 213199_at    | hypothetical protein                                                               | <i>DKFZP586P0123</i>           | 26005       |
| 236079_at    | hypothetical protein DKFZp667E0512                                                 | <i>DKFZp667E0512</i>           | 202025      |
| 1559756_at   | hypothetical protein DKFZp667F0711                                                 | <i>DKFZp667F0711</i>           | 399716      |
| 214030_at    | hypothetical protein DKFZp667G2110                                                 | <i>DKFZp667G2110</i>           | 131544      |
| 230421_at    | similar to hypothetical protein 9630041N07                                         | <i>DKFZp686E2433</i>           | 345462      |
| 231412_at    | hypothetical gene supported by BX538329                                            | <i>DKFZp686L14188</i>          | 441366      |
| 215470_at    | general transcription factor IIH, polypeptide 2, 44kDa-like                        | <i>DKFZP686M0199</i>           | 653238      |
| 221540_x_at  | general transcription factor IIH, polypeptide 2, 44kDa /// general transcription f | <i>DKFZP686M0199</i>           | 2966 /// 65 |
| 216877_at    | Hypothetical gene supported by BC043549; BX648102                                  | <i>DKFZp686O1327</i>           | 401014      |
| 235085_at    | homolog of rat pragma of Rnd2                                                      | <i>DKFZp761P0423</i>           | 157285      |
| 219908_at    | dickkopf homolog 2 (Xenopus laevis)                                                | <i>DKK2</i>                    | 27123       |
| 212568_s_at  | dihydrolipoamide S-acetyltransferase (E2 component of pyruvate dehydrogenas        | <i>DLAT</i>                    | 1737        |
| 216870_x_at  | deleted in lymphocytic leukemia, 2                                                 | <i>DLEU2</i>                   | 8847        |
| 202514_at    | discs, large homolog 1 (Drosophila)                                                | <i>DLG1</i>                    | 1739        |
| 202515_at    | discs, large homolog 1 (Drosophila)                                                | <i>DLG1</i>                    | 1739        |
| 230229_at    | Discs, large homolog 1 (Drosophila)                                                | <i>DLG1</i>                    | 1739        |
| 206253_at    | discs, large homolog 2, chapsyn-110 (Drosophila)                                   | <i>DLG2</i>                    | 1740        |
| 203764_at    | discs, large homolog 7 (Drosophila)                                                | <i>DLG7</i>                    | 9787        |
| 233056_x_at  | discs, large (Drosophila) homolog-associated protein 4                             | <i>DLGAP4</i>                  | 22839       |
| 224215_s_at  | delta-like 1 (Drosophila)                                                          | <i>DLL1</i>                    | 28514       |
| 207660_at    | dystrophin (muscular dystrophy, Duchenne and Becker types)                         | <i>DMD</i>                     | 1756        |
| 203881_s_at  | dystrophin (muscular dystrophy, Duchenne and Becker types)                         | <i>DMD</i>                     | 1756        |
| 241472_at    | Dmx-like 1                                                                         | <i>DMXL1</i>                   | ---         |
| 203791_at    | Dmx-like 1                                                                         | <i>DMXL1</i>                   | 1657        |
| 212820_at    | Dmx-like 2                                                                         | <i>DMXL2</i>                   | 23312       |
| 213647_at    | DNA2 DNA replication helicase 2-like (yeast)                                       | <i>DNA2L</i>                   | 1763        |
| 1560416_at   | dynein, axonemal, heavy chain 11                                                   | <i>DNAH11</i>                  | 8701        |
| 220725_x_at  | Dynein, axonemal, heavy chain 3                                                    | <i>DNAH3</i>                   | 55567       |
| 214222_at    | dynein, axonemal, heavy chain 7                                                    | <i>DNAH7</i>                   | 56171       |
| 209157_at    | DnaJ (Hsp40) homolog, subfamily A, member 2                                        | <i>DNAJA2</i>                  | 10294       |
| 1554078_s_at | DnaJ (Hsp40) homolog, subfamily A, member 3                                        | <i>DNAJA3</i>                  | 9093        |
| 205963_s_at  | DnaJ (Hsp40) homolog, subfamily A, member 3                                        | <i>DNAJA3</i>                  | 9093        |
| 202866_at    | DnaJ (Hsp40) homolog, subfamily B, member 12                                       | <i>DNAJB12</i>                 | 54788       |
| 202500_at    | DnaJ (Hsp40) homolog, subfamily B, member 2                                        | <i>DNAJB2</i>                  | 3300        |
| 203810_at    | DnaJ (Hsp40) homolog, subfamily B, member 4                                        | <i>DNAJB4</i>                  | 11080       |
| 208811_s_at  | DnaJ (Hsp40) homolog, subfamily B, member 6                                        | <i>DNAJB6</i>                  | 10049       |
| 209015_s_at  | DnaJ (Hsp40) homolog, subfamily B, member 6                                        | <i>DNAJB6</i>                  | 10049       |
| 208810_at    | DnaJ (Hsp40) homolog, subfamily B, member 6 /// similar to DnaJ (Hsp40) homoc      | <i>DNAJB6</i> /// <i>LOC38</i> | 10049       |
| 1554462_a_at | DnaJ (Hsp40) homolog, subfamily B, member 9                                        | <i>DNAJB9</i>                  | 4189        |
| 202843_at    | DnaJ (Hsp40) homolog, subfamily B, member 9                                        | <i>DNAJB9</i>                  | 4189        |
| 202842_s_at  | DnaJ (Hsp40) homolog, subfamily B, member 9                                        | <i>DNAJB9</i>                  | 4189        |
| 222620_s_at  | DnaJ (Hsp40) homolog, subfamily C, member 1                                        | <i>DNAJC1</i>                  | 64215       |
| 225174_at    | DnaJ (Hsp40) homolog, subfamily C, member 10                                       | <i>DNAJC10</i>                 | 54431       |
| 227808_at    | DnaJ (Hsp40) homolog, subfamily C, member 15                                       | <i>DNAJC15</i>                 | 29103       |
| 218435_at    | DnaJ (Hsp40) homolog, subfamily C, member 15                                       | <i>DNAJC15</i>                 | 29103       |
| 225358_at    | DnaJ (Hsp40) homolog, subfamily C, member 19                                       | <i>DNAJC19</i>                 | 131118      |

|              |                                                                                   |                                 |              |
|--------------|-----------------------------------------------------------------------------------|---------------------------------|--------------|
| 225359_at    | DnaJ (Hsp40) homolog, subfamily C, member 19                                      | <i>DNAJC19</i>                  | 131118       |
| 235341_at    | DnaJ (Hsp40) homolog, subfamily C, member 3                                       | <i>DNAJC3</i>                   | 5611         |
| 208499_s_at  | DnaJ (Hsp40) homolog, subfamily C, member 3                                       | <i>DNAJC3</i>                   | 5611         |
| 225284_at    | DnaJ (Hsp40) homolog, subfamily C, member 3 /// hypothetical protein LOC144       | <i>DNAJC3</i> /// <i>LOC144</i> | 144871       |
| 1558080_s_at | DnaJ (Hsp40) homolog, subfamily C, member 3 /// hypothetical protein LOC144       | <i>DNAJC3</i> /// <i>LOC144</i> | 144871       |
| 228622_s_at  | DnaJ (Hsp40) homolog, subfamily C, member 4                                       | <i>DNAJC4</i>                   | 3338         |
| 206782_s_at  | DnaJ (Hsp40) homolog, subfamily C, member 4                                       | <i>DNAJC4</i>                   | 3338         |
| 224613_s_at  | DnaJ (Hsp40) homolog, subfamily C, member 5                                       | <i>DNAJC5</i>                   | 80331        |
| 232798_at    | DnaJ (Hsp40) homolog, subfamily C, member 5 beta                                  | <i>DNAJC5B</i>                  | 85479        |
| 212491_s_at  | DnaJ (Hsp40) homolog, subfamily C, member 8                                       | <i>DNAJC8</i>                   | 22826        |
| 213088_s_at  | DnaJ (Hsp40) homolog, subfamily C, member 9                                       | <i>DNAJC9</i>                   | 23234        |
| 203912_s_at  | deoxyribonuclease I-like 1                                                        | <i>DNASE1L1</i>                 | 1774         |
| 205554_s_at  | deoxyribonuclease I-like 3                                                        | <i>DNASE1L3</i>                 | 1776         |
| 222070_at    | dead end homolog 1 (zebrafish)                                                    | <i>DND1</i>                     | 373863       |
| 243802_at    | Dynein heavy chain domain 2                                                       | <i>DNHD2</i>                    | 201625       |
| 226154_at    | dynamamin 1-like                                                                  | <i>DNM1L</i>                    | 10059        |
| 203105_s_at  | dynamamin 1-like                                                                  | <i>DNM1L</i>                    | 10059        |
| 1558501_at   | dynamamin 3                                                                       | <i>DNM3</i>                     | 26052        |
| 209839_at    | dynamamin 3                                                                       | <i>DNM3</i>                     | 26052        |
| 222640_at    | DNA (cytosine-5-)-methyltransferase 3 alpha                                       | <i>DNMT3A</i>                   | 1788         |
| 234942_s_at  | deoxynucleotidyltransferase, terminal, interacting protein 1                      | <i>DNTTIP1</i>                  | 116092       |
| 224825_at    | deoxynucleotidyltransferase, terminal, interacting protein 1                      | <i>DNTTIP1</i>                  | 116092       |
| 205003_at    | dedicator of cytokinesis 4                                                        | <i>DOCK4</i>                    | 9732         |
| 1558691_a_at | dedicator of cytokinesis 4                                                        | <i>DOCK4</i>                    | 9732         |
| 1569590_at   | dedicator of cytokinesis 5                                                        | <i>DOCK5</i>                    | 80005        |
| 230207_s_at  | Dedicator of cytokinesis 5                                                        | <i>DOCK5</i>                    | 80005        |
| 230206_at    | Dedicator of cytokinesis 5                                                        | <i>DOCK5</i>                    | 80005        |
| 1570078_a_at | dedicator of cytokinesis 5                                                        | <i>DOCK5</i>                    | 80005        |
| 222721_at    | dedicator of cytokinesis 5                                                        | <i>DOCK5</i>                    | 80005        |
| 232842_at    | dedicator of cytokinesis 8                                                        | <i>DOCK8</i>                    | 81704        |
| 212538_at    | dedicator of cytokinesis 9                                                        | <i>DOCK9</i>                    | 23348        |
| 214054_at    | docking protein 2, 56kDa                                                          | <i>DOK2</i>                     | 9046         |
| 220320_at    | docking protein 3                                                                 | <i>DOK3</i>                     | 79930        |
| 214844_s_at  | docking protein 5                                                                 | <i>DOK5</i>                     | 55816        |
| 38157_at     | dom-3 homolog Z (C. elegans)                                                      | <i>DOM3Z</i>                    | 1797         |
| 221677_s_at  | downstream neighbor of SON                                                        | <i>DONSON</i>                   | 29980        |
| 231297_at    | DOT1-like, histone H3 methyltransferase (S. cerevisiae)                           | <i>DOT1L</i>                    | 84444        |
| 219452_at    | dipeptidase 2                                                                     | <i>DPEP2</i>                    | 64174        |
| 220179_at    | dipeptidase 3                                                                     | <i>DPEP3</i>                    | 64180        |
| 225195_at    | DPH3, KTI11 homolog (S. cerevisiae)                                               | <i>DPH3</i>                     | 285381       |
| 213853_at    | DPH4, JJJ3 homolog (S. cerevisiae)                                                | <i>DPH4</i>                     | 120526       |
| 219590_x_at  | DPH5 homolog (S. cerevisiae)                                                      | <i>DPH5</i>                     | 51611        |
| 223671_x_at  | DPH5 homolog (S. cerevisiae)                                                      | <i>DPH5</i>                     | 51611        |
| 202673_at    | dolichyl-phosphate mannosyltransferase polypeptide 1, catalytic subunit           | <i>DPM1</i>                     | 8813         |
| 231385_at    | developmental pluripotency associated 3                                           | <i>DPPA3</i>                    | 359787 /// 4 |
| 232985_s_at  | developmental pluripotency associated 4                                           | <i>DPPA4</i>                    | 55211        |
| 219651_at    | developmental pluripotency associated 4                                           | <i>DPPA4</i>                    | 55211        |
| 212792_at    | dpy-19-like 1 (C. elegans)                                                        | <i>DPY19L1</i>                  | 23333        |
| 1557290_at   | dpy-19-like 2 (C. elegans) /// dpy-19-like 2 pseudogene 2 (C. elegans) /// dpy-19 | <i>DPY19L2</i> /// <i>DPY15</i> | 283417 /// 5 |
| 215143_at    | dpy-19-like 2 pseudogene 2 (C. elegans)                                           | <i>DPY19L2P2</i>                | 349152       |
| 225633_at    | dpy-19-like 3 (C. elegans)                                                        | <i>DPY19L3</i>                  | 147991       |
| 1554534_at   | dihydropyrimidine dehydrogenase                                                   | <i>DPYD</i>                     | 1806         |
| 204646_at    | dihydropyrimidine dehydrogenase                                                   | <i>DPYD</i>                     | 1806         |
| 241992_at    | Damage-regulated autophagy modulator                                              | <i>DRAM</i>                     | 55332        |
| 237702_at    | Developmentally regulated RNA-binding protein 1                                   | <i>DRB1</i>                     | 129831       |
| 206590_x_at  | dopamine receptor D2                                                              | <i>DRD2</i>                     | 1813         |
| 208486_at    | dopamine receptor D5                                                              | <i>DRD5</i>                     | 1816         |
| 204751_x_at  | desmocolin 2                                                                      | <i>DSC2</i>                     | 1824         |
| 203405_at    | Down syndrome critical region gene 2                                              | <i>DSCR2</i>                    | 8624         |
| 203635_at    | Down syndrome critical region gene 3                                              | <i>DSCR3</i>                    | 10311        |
| 217309_s_at  | Down syndrome critical region gene 3                                              | <i>DSCR3</i>                    | 10311        |
| 218854_at    | dermatan sulfate epimerase                                                        | <i>DSE</i>                      | 29940        |
| 206642_at    | desmoglein 1                                                                      | <i>DSG1</i>                     | 1828         |

|              |                                                                                   |                          |            |
|--------------|-----------------------------------------------------------------------------------|--------------------------|------------|
| 219512_at    | DSN1, MIND kinetochore complex component, homolog (S. cerevisiae)                 | <i>DSN1</i>              | 79980      |
| 221681_s_at  | dentin sialophosphoprotein                                                        | <i>DSPP</i>              | 1834       |
| 215810_x_at  | Dystonin                                                                          | <i>DST</i>               | 667        |
| 218585_s_at  | denticleless homolog (Drosophila)                                                 | <i>DTL</i>               | 51514      |
| 222680_s_at  | denticleless homolog (Drosophila)                                                 | <i>DTL</i>               | 51514      |
| 223445_at    | dystrobrevin binding protein 1                                                    | <i>DTNBP1</i>            | 84062      |
| 223446_s_at  | dystrobrevin binding protein 1                                                    | <i>DTNBP1</i>            | 84062      |
| 223763_at    | dystrobrevin binding protein 1                                                    | <i>DTNBP1</i>            | 84062      |
| 236649_at    | DTW domain containing 1                                                           | <i>DTWD1</i>             | 56986      |
| 215732_s_at  | deltex homolog 2 (Drosophila)                                                     | <i>DTX2</i>              | 100134197, |
| 225415_at    | deltex 3-like (Drosophila)                                                        | <i>DTX3L</i>             | 151636     |
| 212611_at    | deltex 4 homolog (Drosophila)                                                     | <i>DTX4</i>              | 23220      |
| 1565795_at   | dual oxidase 1                                                                    | <i>DUOX1</i>             | 53905      |
| 47105_at     | dihydrouridine synthase 2-like, SMM1 homolog (S. cerevisiae)                      | <i>DUS2L</i>             | 54920      |
| 219486_at    | dihydrouridine synthase 2-like, SMM1 homolog (S. cerevisiae)                      | <i>DUS2L</i>             | 54920      |
| 224966_s_at  | dihydrouridine synthase 3-like (S. cerevisiae)                                    | <i>DUS3L</i>             | 56931      |
| 201041_s_at  | dual specificity phosphatase 1                                                    | <i>DUSP1</i>             | 1843       |
| 221563_at    | dual specificity phosphatase 10                                                   | <i>DUSP10</i>            | 11221      |
| 215501_s_at  | dual specificity phosphatase 10                                                   | <i>DUSP10</i>            | 11221      |
| 219963_at    | dual specificity phosphatase 13                                                   | <i>DUSP13</i>            | 51207      |
| 1555399_a_at | dual specificity phosphatase 16                                                   | <i>DUSP16</i>            | 80824      |
| 224832_at    | dual specificity phosphatase 16                                                   | <i>DUSP16</i>            | 80824      |
| 224336_s_at  | dual specificity phosphatase 16                                                   | <i>DUSP16</i>            | 80824      |
| 1555598_a_at | dual specificity phosphatase 19                                                   | <i>DUSP19</i>            | 142679     |
| 204794_at    | dual specificity phosphatase 2                                                    | <i>DUSP2</i>             | 1844       |
| 223402_at    | dual specificity phosphatase 23                                                   | <i>DUSP23</i>            | 54935      |
| 201536_at    | dual specificity phosphatase 3 (vaccinia virus phosphatase VH1-related)           | <i>DUSP3</i>             | 1845       |
| 201538_s_at  | dual specificity phosphatase 3 (vaccinia virus phosphatase VH1-related)           | <i>DUSP3</i>             | 1845       |
| 201537_s_at  | dual specificity phosphatase 3 (vaccinia virus phosphatase VH1-related)           | <i>DUSP3</i>             | 1845       |
| 209457_at    | dual specificity phosphatase 5                                                    | <i>DUSP5</i>             | 1847       |
| 208893_s_at  | dual specificity phosphatase 6                                                    | <i>DUSP6</i>             | 1848       |
| 208956_x_at  | dUTP pyrophosphatase                                                              | <i>DUT</i>               | 1854       |
| 209932_s_at  | dUTP pyrophosphatase                                                              | <i>DUT</i>               | 1854       |
| 208955_at    | dUTP pyrophosphatase                                                              | <i>DUT</i>               | 1854       |
| 220774_at    | dymeclin                                                                          | <i>DYM</i>               | 54808      |
| 211684_s_at  | dynein, cytoplasmic 1, intermediate chain 2                                       | <i>DYNC1I2</i>           | 1781       |
| 222479_s_at  | dynein, cytoplasmic 1, light intermediate chain 1                                 | <i>DYNC1LI1</i>          | 51143      |
| 1565149_at   | dynein, cytoplasmic 2, heavy chain 1                                              | <i>DYNC2H1</i>           | 79659      |
| 200703_at    | dynein, light chain, LC8-type 1 /// similar to dynein, cytoplasmic, light peptide | <i>DYNLL1 /// LOC731</i> | 8655       |
| 203303_at    | dynein, light chain, Tctex-type 3                                                 | <i>DYNLT3</i>            | 6990       |
| 211079_s_at  | dual-specificity tyrosine-(Y)-phosphorylation regulated kinase 1A                 | <i>DYRK1A</i>            | 1859       |
| 209033_s_at  | dual-specificity tyrosine-(Y)-phosphorylation regulated kinase 1A                 | <i>DYRK1A</i>            | 1859       |
| 202968_s_at  | dual-specificity tyrosine-(Y)-phosphorylation regulated kinase 2                  | <i>DYRK2</i>             | 8445       |
| 202971_s_at  | dual-specificity tyrosine-(Y)-phosphorylation regulated kinase 2                  | <i>DYRK2</i>             | 8445       |
| 202970_at    | dual-specificity tyrosine-(Y)-phosphorylation regulated kinase 2                  | <i>DYRK2</i>             | 8445       |
| 218660_at    | dysferlin, limb girdle muscular dystrophy 2B (autosomal recessive)                | <i>DYSF</i>              | 8291       |
| 235273_at    | dyslexia susceptibility 1 candidate 1                                             | <i>DYX1C1</i>            | 161582     |
| 241713_s_at  | dyslexia susceptibility 1 candidate 1                                             | <i>DYX1C1</i>            | 161582     |
| 203693_s_at  | E2F transcription factor 3                                                        | <i>E2F3</i>              | 1871       |
| 203957_at    | E2F transcription factor 6                                                        | <i>E2F6</i>              | 1876       |
| 228033_at    | E2F transcription factor 7                                                        | <i>E2F7</i>              | 144455     |
| 226952_at    | ELL associated factor 1                                                           | <i>ELF1</i>              | 85403      |
| 219551_at    | ELL associated factor 2                                                           | <i>ELF2</i>              | 55840      |
| 202623_at    | E2F-associated phosphoprotein                                                     | <i>EAPP</i>              | 55837      |
| 205419_at    | Epstein-Barr virus induced gene 2 (lymphocyte-specific G protein-coupled recep    | <i>EBI2</i>              | 1880       |
| 223306_at    | emopamil binding protein-like                                                     | <i>EBPL</i>              | 84650      |
| 223087_at    | enoyl Coenzyme A hydratase domain containing 1                                    | <i>ECHDC1</i>            | 55862      |
| 233124_s_at  | enoyl Coenzyme A hydratase domain containing 1                                    | <i>ECHDC1</i>            | 55862      |
| 219974_x_at  | enoyl Coenzyme A hydratase domain containing 1                                    | <i>ECHDC1</i>            | 55862      |
| 223088_x_at  | enoyl Coenzyme A hydratase domain containing 1                                    | <i>ECHDC1</i>            | 55862      |
| 235305_s_at  | enoyl Coenzyme A hydratase domain containing 2                                    | <i>ECHDC2</i>            | 55268      |
| 208091_s_at  | EGFR-coamplified and overexpressed protein                                        | <i>ECOP</i>              | 81552      |
| 219787_s_at  | epithelial cell transforming sequence 2 oncogene                                  | <i>ECT2</i>              | 1894       |

|              |                                                                                  |                |           |
|--------------|----------------------------------------------------------------------------------|----------------|-----------|
| 220048_at    | ectodysplasin A receptor                                                         | <i>EDAR</i>    | 10913     |
| 203279_at    | ER degradation enhancer, mannosidase alpha-like 1                                | <i>EDEM1</i>   | 9695      |
| 230659_at    | ER degradation enhancer, mannosidase alpha-like 1                                | <i>EDEM1</i>   | ---       |
| 220342_x_at  | ER degradation enhancer, mannosidase alpha-like 3                                | <i>EDEM3</i>   | 80267     |
| 220926_s_at  | ER degradation enhancer, mannosidase alpha-like 3                                | <i>EDEM3</i>   | 80267     |
| 209058_at    | endothelial differentiation-related factor 1                                     | <i>EDF1</i>    | 8721      |
| 209059_s_at  | endothelial differentiation-related factor 1                                     | <i>EDF1</i>    | 8721      |
| 204642_at    | endothelial differentiation, sphingolipid G-protein-coupled receptor, 1          | <i>EDG1</i>    | 1901      |
| 204038_s_at  | endothelial differentiation, lysophosphatidic acid G-protein-coupled receptor, 2 | <i>EDG2</i>    | 1902      |
| 204036_at    | endothelial differentiation, lysophosphatidic acid G-protein-coupled receptor, 2 | <i>EDG2</i>    | 1902      |
| 206437_at    | endothelial differentiation, lysophosphatidic acid G-protein-coupled receptor, 6 | <i>EDG6</i>    | 8698      |
| 207379_at    | EGF-like repeats and discoidin I-like domains 3                                  | <i>EDIL3</i>   | 10085     |
| 1558643_s_at | EGF-like repeats and discoidin I-like domains 3                                  | <i>EDIL3</i>   | 10085     |
| 225275_at    | EGF-like repeats and discoidin I-like domains 3                                  | <i>EDIL3</i>   | 10085     |
| 218995_s_at  | endothelin 1                                                                     | <i>EDN1</i>    | 1906      |
| 204463_s_at  | endothelin receptor type A                                                       | <i>EDNRA</i>   | 1909      |
| 204271_s_at  | endothelin receptor type B                                                       | <i>EDNRB</i>   | 1910      |
| 225885_at    | early endosome antigen 1                                                         | <i>EEA1</i>    | 8411      |
| 204841_s_at  | early endosome antigen 1                                                         | <i>EEA1</i>    | 8411      |
| 209572_s_at  | embryonic ectoderm development                                                   | <i>EED</i>     | 8726      |
| 203113_s_at  | eukaryotic translation elongation factor 1 delta (guanine nucleotide exchange p  | <i>EEF1D</i>   | 1936      |
| 204905_s_at  | eukaryotic translation elongation factor 1 epsilon 1                             | <i>EEF1E1</i>  | 9521      |
| 225546_at    | eukaryotic elongation factor-2 kinase                                            | <i>EEF2K</i>   | 29904     |
| 225545_at    | eukaryotic elongation factor-2 kinase                                            | <i>EEF2K</i>   | 29904     |
| 223608_at    | EF-hand calcium binding domain 2                                                 | <i>EFCAB2</i>  | 84288     |
| 1553392_at   | EF-hand calcium binding domain 3                                                 | <i>EFCAB3</i>  | 100133744 |
| 1557961_s_at | EF-hand calcium binding protein 1                                                | <i>EFCBP1</i>  | 100127983 |
| 215005_at    | EF-hand calcium binding protein 2                                                | <i>EFCBP2</i>  | 54550     |
| 209356_x_at  | EGF-containing fibulin-like extracellular matrix protein 2                       | <i>EFEMP2</i>  | 30008     |
| 206580_s_at  | EGF-containing fibulin-like extracellular matrix protein 2                       | <i>EFEMP2</i>  | 30008     |
| 225656_at    | EF-hand domain (C-terminal) containing 1                                         | <i>EFHC1</i>   | 114327    |
| 222483_at    | EF-hand domain family, member D2                                                 | <i>EFHD2</i>   | 79180     |
| 202668_at    | ephrin-B2                                                                        | <i>EFNB2</i>   | 1948      |
| 206254_at    | epidermal growth factor (beta-urogastrone)                                       | <i>EGF</i>     | 1950      |
| 223046_at    | egl nine homolog 1 (C. elegans)                                                  | <i>EGLN1</i>   | 54583     |
| 224314_s_at  | egl nine homolog 1 (C. elegans)                                                  | <i>EGLN1</i>   | 54583     |
| 221497_x_at  | egl nine homolog 1 (C. elegans)                                                  | <i>EGLN1</i>   | 54583     |
| 223045_at    | egl nine homolog 1 (C. elegans)                                                  | <i>EGLN1</i>   | 54583     |
| 220956_s_at  | egl nine homolog 2 (C. elegans)                                                  | <i>EGLN2</i>   | 112398    |
| 212650_at    | EH domain binding protein 1                                                      | <i>EHBP1</i>   | 23301     |
| 209039_x_at  | EH-domain containing 1                                                           | <i>EHD1</i>    | 10938     |
| 209037_s_at  | EH-domain containing 1                                                           | <i>EHD1</i>    | 10938     |
| 222221_x_at  | EH-domain containing 1                                                           | <i>EHD1</i>    | 10938     |
| 209038_s_at  | EH-domain containing 1                                                           | <i>EHD1</i>    | 10938     |
| 208112_x_at  | EH-domain containing 1                                                           | <i>EHD1</i>    | 10938     |
| 209536_s_at  | EH-domain containing 4                                                           | <i>EHD4</i>    | 30844     |
| 224189_x_at  | ets homologous factor                                                            | <i>EHF</i>     | 26298     |
| 225645_at    | Ets homologous factor                                                            | <i>EHF</i>     | 26298     |
| 216396_s_at  | etoposide induced 2.4 mRNA                                                       | <i>EI24</i>    | 9538      |
| 211698_at    | EP300 interacting inhibitor of differentiation 1                                 | <i>EID1</i>    | 23741     |
| 208669_s_at  | EP300 interacting inhibitor of differentiation 1                                 | <i>EID1</i>    | 23741     |
| 211956_s_at  | eukaryotic translation initiation factor 1                                       | <i>EIF1</i>    | 10209     |
| 212130_x_at  | eukaryotic translation initiation factor 1                                       | <i>EIF1</i>    | 10209     |
| 202021_x_at  | eukaryotic translation initiation factor 1                                       | <i>EIF1</i>    | 10209     |
| 212227_x_at  | eukaryotic translation initiation factor 1                                       | <i>EIF1</i>    | 10209     |
| 212225_at    | eukaryotic translation initiation factor 1                                       | <i>EIF1</i>    | 10209     |
| 201738_at    | eukaryotic translation initiation factor 1B                                      | <i>EIF1B</i>   | 10289     |
| 204211_x_at  | eukaryotic translation initiation factor 2-alpha kinase 2                        | <i>EIF2AK2</i> | 5610      |
| 218696_at    | eukaryotic translation initiation factor 2-alpha kinase 3                        | <i>EIF2AK3</i> | 9451      |
| 225164_s_at  | eukaryotic translation initiation factor 2 alpha kinase 4                        | <i>EIF2AK4</i> | 440275    |
| 201632_at    | eukaryotic translation initiation factor 2B, subunit 1 alpha, 26kDa              | <i>EIF2B1</i>  | 1967      |
| 202461_at    | eukaryotic translation initiation factor 2B, subunit 2 beta, 39kDa               | <i>EIF2B2</i>  | 8892      |
| 215482_s_at  | eukaryotic translation initiation factor 2B, subunit 4 delta, 67kDa              | <i>EIF2B4</i>  | 8890      |

|              |                                                                                       |                           |              |
|--------------|---------------------------------------------------------------------------------------|---------------------------|--------------|
| 212351_at    | eukaryotic translation initiation factor 2B, subunit 5 epsilon, 82kDa                 | <i>EIF2B5</i>             | 8893         |
| 218287_s_at  | eukaryotic translation initiation factor 2C, 1                                        | <i>EIF2C1</i>             | 26523        |
| 225827_at    | eukaryotic translation initiation factor 2C, 2                                        | <i>EIF2C2</i>             | 27161        |
| 219190_s_at  | eukaryotic translation initiation factor 2C, 4                                        | <i>EIF2C4</i>             | 192669 /// : |
| 222842_at    | eukaryotic translation initiation factor 2C, 4                                        | <i>EIF2C4</i>             | 192669 /// : |
| 227930_at    | eukaryotic translation initiation factor 2C, 4                                        | <i>EIF2C4</i>             | 192670       |
| 201142_at    | eukaryotic translation initiation factor 2, subunit 1 alpha, 35kDa                    | <i>EIF2S1</i>             | 1965         |
| 201143_s_at  | eukaryotic translation initiation factor 2, subunit 1 alpha, 35kDa                    | <i>EIF2S1</i>             | 1965         |
| 208726_s_at  | eukaryotic translation initiation factor 2, subunit 2 beta, 38kDa                     | <i>EIF2S2</i>             | 8894         |
| 200597_at    | eukaryotic translation initiation factor 3, subunit A                                 | <i>EIF3A</i>              | 8661         |
| 242550_at    | eukaryotic translation initiation factor 3, subunit B                                 | <i>EIF3B</i>              | 8662         |
| 208688_x_at  | eukaryotic translation initiation factor 3, subunit B                                 | <i>EIF3B</i>              | 8662         |
| 203462_x_at  | eukaryotic translation initiation factor 3, subunit B                                 | <i>EIF3B</i>              | 8662         |
| 215230_x_at  | eukaryotic translation initiation factor 3, subunit C /// eukaryotic translation init | <i>EIF3C /// EIF3CL</i>   | 728689 /// : |
| 200647_x_at  | eukaryotic translation initiation factor 3, subunit C /// eukaryotic translation init | <i>EIF3C /// EIF3CL</i>   | 728689 /// : |
| 200005_at    | eukaryotic translation initiation factor 3, subunit D                                 | <i>EIF3D</i>              | 8664         |
| 208697_s_at  | eukaryotic translation initiation factor 3, subunit E                                 | <i>EIF3E</i>              | 3646         |
| 217364_x_at  | eukaryotic translation initiation factor 3, subunit J /// hypothetical protein LOC7   | <i>EIF3J /// LOC73002</i> | 8669         |
| 215190_at    | eukaryotic translation initiation factor 3, subunit M                                 | <i>EIF3M</i>              | 10480        |
| 202232_s_at  | eukaryotic translation initiation factor 3, subunit M                                 | <i>EIF3M</i>              | 10480        |
| 201303_at    | eukaryotic translation initiation factor 4A, isoform 3                                | <i>EIF4A3</i>             | 9775         |
| 201437_s_at  | eukaryotic translation initiation factor 4E                                           | <i>EIF4E</i>              | 1977         |
| 226734_at    | eukaryotic translation initiation factor 4E family member 2                           | <i>EIF4E2</i>             | 9470         |
| 213571_s_at  | eukaryotic translation initiation factor 4E family member 2                           | <i>EIF4E2</i>             | 9470         |
| 209393_s_at  | eukaryotic translation initiation factor 4E family member 2                           | <i>EIF4E2</i>             | 9470         |
| 238461_at    | eukaryotic translation initiation factor 4E family member 3                           | <i>EIF4E3</i>             | 317649       |
| 225939_at    | eukaryotic translation initiation factor 4E family member 3                           | <i>EIF4E3</i>             | 317649       |
| 221539_at    | eukaryotic translation initiation factor 4E binding protein 1                         | <i>EIF4EBP1</i>           | 1978         |
| 208769_at    | eukaryotic translation initiation factor 4E binding protein 2                         | <i>EIF4EBP2</i>           | ---          |
| 214919_s_at  | eukaryotic translation initiation factor 4E binding protein 3 /// MASK-4E-BP3 alt     | <i>EIF4EBP3 /// MASK</i>  | 404734 /// : |
| 208624_s_at  | eukaryotic translation initiation factor 4 gamma, 1                                   | <i>EIF4G1</i>             | 1981         |
| 1554309_at   | eukaryotic translation initiation factor 4 gamma, 3                                   | <i>EIF4G3</i>             | 8672         |
| 206621_s_at  | eukaryotic translation initiation factor 4H                                           | <i>EIF4H</i>              | 7458         |
| 208705_s_at  | eukaryotic translation initiation factor 5                                            | <i>EIF5</i>               | 1983         |
| 208290_s_at  | eukaryotic translation initiation factor 5                                            | <i>EIF5</i>               | 1983         |
| 208708_x_at  | eukaryotic translation initiation factor 5                                            | <i>EIF5</i>               | 1983         |
| 208707_at    | eukaryotic translation initiation factor 5                                            | <i>EIF5</i>               | 1983         |
| 235296_at    | eukaryotic translation initiation factor 5A2                                          | <i>EIF5A2</i>             | 56648        |
| 201026_at    | eukaryotic translation initiation factor 5B                                           | <i>EIF5B</i>              | 9669         |
| 201024_x_at  | eukaryotic translation initiation factor 5B                                           | <i>EIF5B</i>              | 9669         |
| 201025_at    | eukaryotic translation initiation factor 5B                                           | <i>EIF5B</i>              | 9669         |
| 214314_s_at  | eukaryotic translation initiation factor 5B                                           | <i>EIF5B</i>              | 9669         |
| 228260_at    | ELAV (embryonic lethal, abnormal vision, Drosophila)-like 2 (Hu antigen B)            | <i>ELAVL2</i>             | 1993         |
| 212418_at    | E74-like factor 1 (ets domain transcription factor)                                   | <i>ELF1</i>               | 1997         |
| 212420_at    | E74-like factor 1 (ets domain transcription factor)                                   | <i>ELF1</i>               | 1997         |
| 220625_s_at  | E74-like factor 5 (ets domain transcription factor)                                   | <i>ELF5</i>               | 2001         |
| 210376_x_at  | ELK1, member of ETS oncogene family                                                   | <i>ELK1</i>               | 2002         |
| 206127_at    | ELK3, ETS-domain protein (SRF accessory protein 2)                                    | <i>ELK3</i>               | 2004         |
| 225159_s_at  | ELK4, ETS-domain protein (SRF accessory protein 1)                                    | <i>ELK4</i>               | ---          |
| 238761_at    | ELK4, ETS-domain protein (SRF accessory protein 1)                                    | <i>ELK4</i>               | ---          |
| 214831_at    | ELK4, ETS-domain protein (SRF accessory protein 1)                                    | <i>ELK4</i>               | 80306        |
| 204095_s_at  | elongation factor RNA polymerase II                                                   | <i>ELL</i>                | 8178         |
| 1565254_s_at | elongation factor RNA polymerase II                                                   | <i>ELL</i>                | 8178         |
| 204096_s_at  | elongation factor RNA polymerase II                                                   | <i>ELL</i>                | 8178         |
| 226099_at    | elongation factor, RNA polymerase II, 2                                               | <i>ELL2</i>               | 22936        |
| 214446_at    | elongation factor, RNA polymerase II, 2                                               | <i>ELL2</i>               | 22936        |
| 226982_at    | elongation factor, RNA polymerase II, 2                                               | <i>ELL2</i>               | 22936        |
| 204513_s_at  | engulfment and cell motility 1                                                        | <i>ELMO1</i>              | 9844         |
| 226502_at    | ELMO/CED-12 domain containing 2                                                       | <i>ELMOD2</i>             | 255520       |
| 1567222_x_at | ELOVL family member 5, elongation of long chain fatty acids (FEN1/Elo2, SUR4/1)       | <i>ELOVL5</i>             | 60481        |
| 214153_at    | ELOVL family member 5, elongation of long chain fatty acids (FEN1/Elo2, SUR4/1)       | <i>ELOVL5</i>             | 60481        |
| 204256_at    | ELOVL family member 6, elongation of long chain fatty acids (FEN1/Elo2, SUR4/1)       | <i>ELOVL6</i>             | 79071        |
| 210868_s_at  | ELOVL family member 6, elongation of long chain fatty acids (FEN1/Elo2, SUR4/1)       | <i>ELOVL6</i>             | 79071        |

|             |                                                                        |                |        |
|-------------|------------------------------------------------------------------------|----------------|--------|
| 231713_s_at | elongation protein 2 homolog ( <i>S. cerevisiae</i> )                  | <i>ELP2</i>    | 55250  |
| 227075_at   | elongation protein 3 homolog ( <i>S. cerevisiae</i> )                  | <i>ELP3</i>    | 55140  |
| 219436_s_at | endomucin                                                              | <i>EMCN</i>    | 51705  |
| 209477_at   | emerin (Emery-Dreifuss muscular dystrophy)                             | <i>EMD</i>     | 2010   |
| 234464_s_at | essential meiotic endonuclease 1 homolog 1 ( <i>S. pombe</i> )         | <i>EME1</i>    | 146956 |
| 204398_s_at | echinoderm microtubule associated protein like 2                       | <i>EML2</i>    | 24139  |
| 223069_s_at | echinoderm microtubule associated protein like 4                       | <i>EML4</i>    | 27436  |
| 223068_at   | echinoderm microtubule associated protein like 4                       | <i>EML4</i>    | 27436  |
| 220386_s_at | echinoderm microtubule associated protein like 4                       | <i>EML4</i>    | 27436  |
| 232587_at   | echinoderm microtubule associated protein like 4                       | <i>EML4</i>    | 27436  |
| 228674_s_at | echinoderm microtubule associated protein like 4                       | <i>EML4</i>    | 27436  |
| 1556732_at  | Echinoderm microtubule associated protein like 4                       | <i>EML4</i>    | 27436  |
| 242443_at   | Echinoderm microtubule associated protein like 5                       | <i>EML5</i>    | 161436 |
| 1568777_at  | echinoderm microtubule associated protein like 5                       | <i>EML5</i>    | 161436 |
| 201324_at   | epithelial membrane protein 1                                          | <i>EMP1</i>    | 2012   |
| 203729_at   | epithelial membrane protein 3                                          | <i>EMP3</i>    | 2014   |
| 232009_at   | egf-like module containing, mucin-like, hormone receptor-like 2        | <i>EMR2</i>    | 30817  |
| 207610_s_at | egf-like module containing, mucin-like, hormone receptor-like 2        | <i>EMR2</i>    | 30817  |
| 210724_at   | egf-like module containing, mucin-like, hormone receptor-like 3        | <i>EMR3</i>    | 84658  |
| 228553_at   | Enabled homolog ( <i>Drosophila</i> )                                  | <i>ENAH</i>    | 55740  |
| 212570_at   | endonuclease domain containing 1                                       | <i>ENDOD1</i>  | 23052  |
| 212573_at   | endonuclease domain containing 1                                       | <i>ENDOD1</i>  | 23052  |
| 201231_s_at | enolase 1, (alpha)                                                     | <i>ENO1</i>    | 2023   |
| 217294_s_at | enolase 1, (alpha)                                                     | <i>ENO1</i>    | 2023   |
| 240258_at   | enolase 1, (alpha)                                                     | <i>ENO1</i>    | 2023   |
| 201313_at   | enolase 2 (gamma, neuronal)                                            | <i>ENO2</i>    | 2026   |
| 204143_s_at | enolase superfamily member 1                                           | <i>ENOSF1</i>  | 55556  |
| 213645_at   | enolase superfamily member 1                                           | <i>ENOSF1</i>  | 55556  |
| 32042_at    | ecto-NOX disulfide-thiol exchanger 2                                   | <i>ENOX2</i>   | 10495  |
| 204845_s_at | glutamyl aminopeptidase (aminopeptidase A)                             | <i>ENPEP</i>   | 2028   |
| 232737_s_at | ectonucleotide pyrophosphatase/phosphodiesterase 3                     | <i>ENPP3</i>   | 5169   |
| 204160_s_at | ectonucleotide pyrophosphatase/phosphodiesterase 4 (putative function) | <i>ENPP4</i>   | 22875  |
| 227803_at   | ectonucleotide pyrophosphatase/phosphodiesterase 5 (putative function) | <i>ENPP5</i>   | 59084  |
| 207691_x_at | ectonucleoside triphosphate diphosphohydrolase 1                       | <i>ENTPD1</i>  | 953    |
| 209473_at   | ectonucleoside triphosphate diphosphohydrolase 1                       | <i>ENTPD1</i>  | 953    |
| 209474_s_at | ectonucleoside triphosphate diphosphohydrolase 1                       | <i>ENTPD1</i>  | 953    |
| 228585_at   | ectonucleoside triphosphate diphosphohydrolase 1                       | <i>ENTPD1</i>  | 953    |
| 1554094_at  | ectonucleoside triphosphate diphosphohydrolase 5                       | <i>ENTPD5</i>  | 957    |
| 226776_at   | Enhancer of yellow 2 homolog ( <i>Drosophila</i> )                     | <i>ENY2</i>    | 56943  |
| 226775_at   | enhancer of yellow 2 homolog ( <i>Drosophila</i> )                     | <i>ENY2</i>    | 56943  |
| 218482_at   | enhancer of yellow 2 homolog ( <i>Drosophila</i> )                     | <i>ENY2</i>    | 56943  |
| 231776_at   | eomesodermin homolog ( <i>Xenopus laevis</i> )                         | <i>EOMES</i>   | 8320   |
| 213579_s_at | E1A binding protein p300                                               | <i>EP300</i>   | 2033   |
| 202221_s_at | E1A binding protein p300                                               | <i>EP300</i>   | 2033   |
| 207793_s_at | erythrocyte membrane protein band 4.1 (elliptocytosis 1, RH-linked)    | <i>EPB41</i>   | 2035   |
| 225051_at   | erythrocyte membrane protein band 4.1 (elliptocytosis 1, RH-linked)    | <i>EPB41</i>   | 2035   |
| 223875_s_at | enhancer of polycomb homolog 1 ( <i>Drosophila</i> )                   | <i>EPC1</i>    | 80314  |
| 225838_at   | enhancer of polycomb homolog 2 ( <i>Drosophila</i> )                   | <i>EPC2</i>    | 26122  |
| 216837_at   | EPH receptor A5                                                        | <i>EPHA5</i>   | 2044   |
| 238533_at   | EPH receptor A7                                                        | <i>EPHA7</i>   | 2045   |
| 230425_at   | EPH receptor B1                                                        | <i>EPHB1</i>   | 2047   |
| 210651_s_at | EPH receptor B2                                                        | <i>EPHB2</i>   | 2048   |
| 204718_at   | EPH receptor B6                                                        | <i>EPHB6</i>   | 2051   |
| 396_f_at    | erythropoietin receptor                                                | <i>EPOR</i>    | 2057   |
| 209962_at   | erythropoietin receptor                                                | <i>EPOR</i>    | 2057   |
| 215054_at   | erythropoietin receptor                                                | <i>EPOR</i>    | 2057   |
| 217886_at   | epidermal growth factor receptor pathway substrate 15                  | <i>EPS15</i>   | 2060   |
| 222113_s_at | epidermal growth factor receptor pathway substrate 15-like 1           | <i>EPS15L1</i> | 58513  |
| 231926_at   | epidermal growth factor receptor pathway substrate 15-like 1           | <i>EPS15L1</i> | 58513  |
| 221056_x_at | epidermal growth factor receptor pathway substrate 15-like 1           | <i>EPS15L1</i> | 58513  |
| 227609_at   | epithelial stromal interaction 1 (breast)                              | <i>EPSTI1</i>  | 94240  |
| 235276_at   | epithelial stromal interaction 1 (breast)                              | <i>EPSTI1</i>  | 94240  |
| 217941_s_at | erbb2 interacting protein                                              | <i>ERBB2IP</i> | 55914  |



|              |                                                                               |                       |              |
|--------------|-------------------------------------------------------------------------------|-----------------------|--------------|
| 222473_s_at  | erbb2 interacting protein                                                     | <i>ERBB2IP</i>        | 55914        |
| 214053_at    | v-erb-a erythroblastic leukemia viral oncogene homolog 4 (avian)              | <i>ERBB4</i>          | 2066         |
| 206794_at    | v-erb-a erythroblastic leukemia viral oncogene homolog 4 (avian)              | <i>ERBB4</i>          | 2066         |
| 216440_at    | ELKS/RAB6-interacting/CAST family member 1                                    | <i>ERC1</i>           | 23085        |
| 202176_at    | excision repair cross-complementing rodent repair deficiency, complementation | <i>ERCC3</i>          | 2071         |
| 1569583_at   | epiregulin                                                                    | <i>EREG</i>           | 2069         |
| 203643_at    | Ets2 repressor factor                                                         | <i>ERF</i>            | 2077         |
| 218135_at    | ERGIC and golgi 2                                                             | <i>ERGIC2</i>         | 51290        |
| 226422_at    | ERGIC and golgi 2                                                             | <i>ERGIC2</i>         | 51290        |
| 227016_at    | glutamate-rich 1                                                              | <i>ERICH1</i>         | 157697       |
| 218498_s_at  | ERO1-like (S. cerevisiae)                                                     | <i>ERO1L</i>          | 30001        |
| 222646_s_at  | ERO1-like (S. cerevisiae)                                                     | <i>ERO1L</i>          | 30001        |
| 220012_at    | ERO1-like beta (S. cerevisiae)                                                | <i>ERO1LB</i>         | 56605        |
| 227450_at    | endoplasmic reticulum protein 27 kDa                                          | <i>ERP27</i>          | 121506       |
| 224657_at    | ERBB receptor feedback inhibitor 1                                            | <i>ERRFI1</i>         | 54206        |
| 1555299_s_at | endogenous retroviral family W, env(C7), member 1 (syncytin)                  | <i>ERVWE1</i>         | 30816        |
| 226866_at    | establishment of cohesion 1 homolog 1 (S. cerevisiae)                         | <i>ESCO1</i>          | 114799       |
| 235216_at    | establishment of cohesion 1 homolog 1 (S. cerevisiae)                         | <i>ESCO1</i>          | 114799       |
| 241252_at    | establishment of cohesion 1 homolog 2 (S. cerevisiae)                         | <i>ESCO2</i>          | 157570       |
| 228162_at    | esterase D/formylglutathione hydrolase                                        | <i>ESD</i>            | 2098         |
| 215095_at    | Esterase D/formylglutathione hydrolase                                        | <i>ESD</i>            | 2098         |
| 218859_s_at  | ESF1, nucleolar pre-rRNA processing protein, homolog (S. cerevisiae)          | <i>ESF1</i>           | 51575        |
| 208394_x_at  | endothelial cell-specific molecule 1                                          | <i>ESM1</i>           | 11082        |
| 204817_at    | extra spindle pole bodies homolog 1 (S. cerevisiae)                           | <i>ESPL1</i>          | 9700         |
| 38158_at     | extra spindle pole bodies homolog 1 (S. cerevisiae)                           | <i>ESPL1</i>          | 9700         |
| 219216_at    | Ewing's tumor-associated antigen 1                                            | <i>ETAA1</i>          | 54465        |
| 201574_at    | eukaryotic translation termination factor 1                                   | <i>ETF1</i>           | 2107         |
| 201573_s_at  | eukaryotic translation termination factor 1                                   | <i>ETF1</i>           | 2107         |
| 201931_at    | electron-transfer-flavoprotein, alpha polypeptide (glutaric aciduria II)      | <i>ETFA</i>           | 2108         |
| 202942_at    | electron-transfer-flavoprotein, beta polypeptide                              | <i>ETFB</i>           | 2109         |
| 204034_at    | ethylmalonic encephalopathy 1                                                 | <i>ETHE1</i>          | 23474        |
| 225290_at    | ethanolamine kinase 1                                                         | <i>ETNK1</i>          | 55500        |
| 201328_at    | v-ets erythroblastosis virus E26 oncogene homolog 2 (avian)                   | <i>ETS2</i>           | 2114         |
| 201329_s_at  | v-ets erythroblastosis virus E26 oncogene homolog 2 (avian)                   | <i>ETS2</i>           | 2114         |
| 221910_at    | ets variant gene 1                                                            | <i>ETV1</i>           | 2115         |
| 203348_s_at  | ets variant gene 5 (ets-related molecule)                                     | <i>ETV5</i>           | 2119         |
| 203349_s_at  | ets variant gene 5 (ets-related molecule)                                     | <i>ETV5</i>           | 2119         |
| 230102_at    | Ets variant gene 5 (ets-related molecule)                                     | <i>ETV5</i>           | 2119         |
| 216375_s_at  | ets variant gene 5 (ets-related molecule)                                     | <i>ETV5</i>           | 2119         |
| 225764_at    | ets variant gene 6 (TEL oncogene)                                             | <i>ETV6</i>           | 2120         |
| 224225_s_at  | ets variant gene 7 (TEL2 oncogene)                                            | <i>ETV7</i>           | 51513        |
| 204774_at    | ecotropic viral integration site 2A                                           | <i>EVI2A</i>          | 2123 /// 212 |
| 211742_s_at  | ecotropic viral integration site 2B                                           | <i>EVI2B</i>          | 2124         |
| 209717_at    | ecotropic viral integration site 5                                            | <i>EVI5</i>           | 7813         |
| 217838_s_at  | Enah/Vasp-like                                                                | <i>EVL</i>            | 51466        |
| 210012_s_at  | Ewing sarcoma breakpoint region 1                                             | <i>EWSR1</i>          | 2130         |
| 228847_at    | exocyst complex component 3                                                   | <i>EXOC3</i>          | 11336        |
| 1552889_a_at | exocyst complex component 3-like 2                                            | <i>EXOC3L2</i>        | 90332        |
| 240528_s_at  | exocyst complex component 4                                                   | <i>EXOC4</i>          | 60412        |
| 224926_at    | exocyst complex component 4                                                   | <i>EXOC4</i>          | 60412        |
| 233924_s_at  | exocyst complex component 6                                                   | <i>EXOC6</i>          | 54536        |
| 226259_at    | exocyst complex component 6                                                   | <i>EXOC6</i>          | 54536        |
| 212026_s_at  | exocyst complex component 7                                                   | <i>EXOC7</i>          | 23265        |
| 214916_x_at  | immunoglobulin heavy locus /// immunoglobulin heavy constant alpha 1 /// im   | <i>EXOC7 /// IGH@</i> | 100126583 ,  |
| 227577_at    | exocyst complex component 8                                                   | <i>EXOC8</i>          | 149371       |
| 207541_s_at  | exosome component 10                                                          | <i>EXOSC10</i>        | 5394         |
| 91684_g_at   | exosome component 4                                                           | <i>EXOSC4</i>         | 54512        |
| 58696_at     | exosome component 4                                                           | <i>EXOSC4</i>         | 54512        |
| 218695_at    | exosome component 4                                                           | <i>EXOSC4</i>         | 54512        |
| 227696_at    | Exosome component 6                                                           | <i>EXOSC6</i>         | 118460       |
| 213648_at    | exosome component 7                                                           | <i>EXOSC7</i>         | 23016        |
| 214734_at    | exophilin 5                                                                   | <i>EXPH5</i>          | 23086        |
| 209537_at    | exostoses (multiple)-like 2                                                   | <i>EXTL2</i>          | 2135         |

|              |                                                                                 |                                |              |
|--------------|---------------------------------------------------------------------------------|--------------------------------|--------------|
| 1561088_at   | eyes absent homolog 4 (Drosophila)                                              | <i>EYA4</i>                    | 2070         |
| 205774_at    | coagulation factor XII (Hageman factor)                                         | <i>F12</i>                     | 2161         |
| 203989_x_at  | coagulation factor II (thrombin) receptor                                       | <i>F2R</i>                     | 2149         |
| 213506_at    | coagulation factor II (thrombin) receptor-like 1                                | <i>F2RL1</i>                   | 2150         |
| 206429_at    | coagulation factor II (thrombin) receptor-like 1                                | <i>F2RL1</i>                   | 2150         |
| 204713_s_at  | coagulation factor V (proaccelerin, labile factor)                              | <i>F5</i>                      | 2153         |
| 204714_s_at  | coagulation factor V (proaccelerin, labile factor)                              | <i>F5</i>                      | 2153         |
| 207300_s_at  | coagulation factor VII (serum prothrombin conversion accelerator)               | <i>F7</i>                      | 2155         |
| 203980_at    | fatty acid binding protein 4, adipocyte                                         | <i>FABP4</i>                   | 2167         |
| 221601_s_at  | Fas apoptotic inhibitory molecule 3                                             | <i>FAIM3</i>                   | 9214         |
| 221602_s_at  | Fas apoptotic inhibitory molecule 3                                             | <i>FAIM3</i>                   | 9214         |
| 224785_at    | family with sequence similarity 100, member B                                   | <i>FAM100B</i>                 | 283991       |
| 224783_at    | family with sequence similarity 100, member B                                   | <i>FAM100B</i>                 | 283991       |
| 226905_at    | family with sequence similarity 101, member B                                   | <i>FAM101B</i>                 | 359845       |
| 226876_at    | family with sequence similarity 101, member B                                   | <i>FAM101B</i>                 | 359845       |
| 212400_at    | family with sequence similarity 102, member A                                   | <i>FAM102A</i>                 | 399665       |
| 226568_at    | family with sequence similarity 102, member B                                   | <i>FAM102B</i>                 | 284611       |
| 227869_at    | Family with sequence similarity 104, member B                                   | <i>FAM104B</i>                 | 90736        |
| 219694_at    | family with sequence similarity 105, member A                                   | <i>FAM105A</i>                 | 54491        |
| 229470_at    | Family with sequence similarity 105, member B                                   | <i>FAM105B</i>                 | ---          |
| 228382_at    | family with sequence similarity 105, member B                                   | <i>FAM105B</i>                 | 90268        |
| 223059_s_at  | family with sequence similarity 107, member B                                   | <i>FAM107B</i>                 | 83641        |
| 223058_at    | family with sequence similarity 107, member B                                   | <i>FAM107B</i>                 | 83641        |
| 226584_s_at  | family with sequence similarity 110, member A                                   | <i>FAM110A</i>                 | 83541        |
| 218248_at    | family with sequence similarity 111, member A                                   | <i>FAM111A</i>                 | 63901        |
| 1557129_a_at | family with sequence similarity 111, member B                                   | <i>FAM111B</i>                 | 374393       |
| 227711_at    | family with sequence similarity 112, member B                                   | <i>FAM112B</i>                 | 121355       |
| 212979_s_at  | family with sequence similarity 115, member A                                   | <i>FAM115A</i>                 | 9747         |
| 221249_s_at  | family with sequence similarity 117, member A                                   | <i>FAM117A</i>                 | 81558        |
| 1555944_at   | family with sequence similarity 120A                                            | <i>FAM120A</i>                 | 23196        |
| 1555945_s_at | family with sequence similarity 120A                                            | <i>FAM120A</i>                 | 23196        |
| 1558761_a_at | family with sequence similarity 120A opposite strand                            | <i>FAM120AOS</i>               | 158293       |
| 227895_at    | family with sequence similarity 120B                                            | <i>FAM120B</i>                 | 84498        |
| 226774_at    | family with sequence similarity 120B                                            | <i>FAM120B</i>                 | 84498        |
| 225361_x_at  | family with sequence similarity 122B                                            | <i>FAM122B</i>                 | 159090       |
| 222673_x_at  | transmembrane protein 57 /// family with sequence similarity 122B               | <i>FAM122B</i> /// <i>TME1</i> | 159090 /// 5 |
| 1552323_s_at | family with sequence similarity 122C                                            | <i>FAM122C</i>                 | 159091       |
| 239047_at    | Family with sequence similarity 122C                                            | <i>FAM122C</i>                 | 159091       |
| 235465_at    | family with sequence similarity 123A                                            | <i>FAM123A</i>                 | 219287       |
| 1556643_at   | Family with sequence similarity 125, member A                                   | <i>FAM125A</i>                 | 100128718    |
| 227239_at    | family with sequence similarity 126, member A                                   | <i>FAM126A</i>                 | 84668        |
| 1554178_a_at | family with sequence similarity 126, member B                                   | <i>FAM126B</i>                 | 285172       |
| 231874_at    | family with sequence similarity 126, member B                                   | <i>FAM126B</i>                 | 285172       |
| 221904_at    | family with sequence similarity 131, member A                                   | <i>FAM131A</i>                 | 131408       |
| 218037_at    | family with sequence similarity 134, member A                                   | <i>FAM134A</i>                 | 79137        |
| 222129_at    | Family with sequence similarity 134, member A                                   | <i>FAM134A</i>                 | 79137        |
| 221983_at    | family with sequence similarity 134, member A                                   | <i>FAM134A</i>                 | 79137        |
| 221984_s_at  | family with sequence similarity 134, member A                                   | <i>FAM134A</i>                 | 79137        |
| 212697_at    | family with sequence similarity 134, member C                                   | <i>FAM134C</i>                 | 162427       |
| 215947_s_at  | family with sequence similarity 136, member A                                   | <i>FAM136A</i>                 | 84908        |
| 237320_at    | family with sequence similarity 137, member B                                   | <i>FAM137B</i>                 | 346653       |
| 1564027_a_at | family with sequence similarity 139, member A                                   | <i>FAM139A</i>                 | 285966       |
| 1564028_s_at | family with sequence similarity 139, member A                                   | <i>FAM139A</i>                 | 285966       |
| 202972_s_at  | family with sequence similarity 13, member A1                                   | <i>FAM13A1</i>                 | 10144        |
| 217047_s_at  | family with sequence similarity 13, member A1                                   | <i>FAM13A1</i>                 | 10144        |
| 202973_x_at  | family with sequence similarity 13, member A1                                   | <i>FAM13A1</i>                 | 10144        |
| 1558711_at   | family with sequence similarity 13, member A1 opposite strand                   | <i>FAM13A1OS</i>               | 285512       |
| 241399_at    | family with sequence similarity 19 (chemokine (C-C motif)-like), member A2      | <i>FAM19A2</i>                 | 338811       |
| 202916_s_at  | family with sequence similarity 20, member B                                    | <i>FAM20B</i>                  | 9917         |
| 212370_x_at  | family with sequence similarity 21, member B /// family with sequence similarit | <i>FAM21A</i> /// <i>FAM2</i>  | 387680 /// 5 |
| 212929_s_at  | family with sequence similarity 21, member B /// family with sequence similarit | <i>FAM21A</i> /// <i>FAM2</i>  | 253725 /// 5 |
| 214946_x_at  | family with sequence similarity 21, member B /// family with sequence similarit | <i>FAM21A</i> /// <i>FAM2</i>  | 253725 /// 5 |
| 211068_x_at  | family with sequence similarity 21, member C /// family with sequence similarit | <i>FAM21C</i> /// <i>FAM2</i>  | 253725 /// 5 |

|              |                                                                                 |                 |              |
|--------------|---------------------------------------------------------------------------------|-----------------|--------------|
| 222685_at    | family with sequence similarity 29, member A                                    | FAM29A          | 54801        |
| 225684_at    | family with sequence similarity 33, member A                                    | FAM33A          | 348235       |
| 225686_at    | family with sequence similarity 33, member A                                    | FAM33A          | 348235       |
| 220547_s_at  | family with sequence similarity 35, member A                                    | FAM35A          | 54537        |
| 224824_at    | family with sequence similarity 36, member A                                    | FAM36A          | 116228       |
| 224820_at    | family with sequence similarity 36, member A                                    | FAM36A          | 116228       |
| 236841_at    | Family with sequence similarity 39, member D pseudogene                         | FAM39DP         | 100133859    |
| 227410_at    | family with sequence similarity 43, member A                                    | FAM43A          | 131583       |
| 242594_at    | family with sequence similarity 44, member A                                    | FAM44A          | 259282       |
| 225351_at    | family with sequence similarity 45, member A                                    | FAM45A          | 404636 /// 5 |
| 221804_s_at  | family with sequence similarity 45, member B /// family with sequence similarit | FAM45A /// FAM4 | 404636 /// 5 |
| 222955_s_at  | family with sequence similarity 45, member B /// family with sequence similarit | FAM45A /// FAM4 | 404636 /// 5 |
| 221766_s_at  | family with sequence similarity 46, member A                                    | FAM46A          | 55603        |
| 224973_at    | family with sequence similarity 46, member A                                    | FAM46A          | 55603        |
| 216717_at    | Family with sequence similarity 48, member A                                    | FAM48A          | 55578        |
| 208092_s_at  | family with sequence similarity 49, member A                                    | FAM49A          | 81553        |
| 217916_s_at  | family with sequence similarity 49, member B                                    | FAM49B          | 51571        |
| 203262_s_at  | family with sequence similarity 50, member A                                    | FAM50A          | 9130         |
| 203206_at    | family with sequence similarity 53, member B                                    | FAM53B          | 9679         |
| 218023_s_at  | family with sequence similarity 53, member C                                    | FAM53C          | 51307        |
| 228069_at    | family with sequence similarity 54, member A                                    | FAM54A          | 113115       |
| 1553828_at   | family with sequence similarity 55, member A                                    | FAM55A          | 120400       |
| 235030_at    | family with sequence similarity 55, member C                                    | FAM55C          | 91775        |
| 218898_at    | family with sequence similarity 57, member A                                    | FAM57A          | 79850        |
| 226466_s_at  | family with sequence similarity 58, member A                                    | FAM58A          | 92002        |
| 208858_s_at  | family with sequence similarity 62 (C2 domain containing), member A             | FAM62A          | 23344        |
| 1555830_s_at | family with sequence similarity 62 (C2 domain containing) member B              | FAM62B          | 57488        |
| 1558511_s_at | family with sequence similarity 62 (C2 domain containing) member B              | FAM62B          | 57488        |
| 224699_s_at  | family with sequence similarity 62 (C2 domain containing) member B              | FAM62B          | 57488        |
| 226062_x_at  | family with sequence similarity 63, member A                                    | FAM63A          | 55793        |
| 214691_x_at  | family with sequence similarity 63, member B                                    | FAM63B          | 54629        |
| 45749_at     | family with sequence similarity 65, member A                                    | FAM65A          | 79567        |
| 218029_at    | family with sequence similarity 65, member A                                    | FAM65A          | 79567        |
| 216044_x_at  | family with sequence similarity 69, member A                                    | FAM69A          | 388650       |
| 213689_x_at  | family with sequence similarity 69, member A                                    | FAM69A          | 388650       |
| 225834_at    | gastric cancer up-regulated-2 /// family with sequence similarity 72, member B  | FAM72A /// FAM7 | 653573 /// 6 |
| 243042_at    | family with sequence similarity 73, member A                                    | FAM73A          | 374986       |
| 226753_at    | family with sequence similarity 76, member B                                    | FAM76B          | 143684       |
| 227002_at    | family with sequence similarity 78, member A                                    | FAM78A          | 286336       |
| 224871_at    | family with sequence similarity 79, member A                                    | FAM79A          | 127262       |
| 229764_at    | family with sequence similarity 79, member B                                    | FAM79B          | 285386       |
| 235948_at    | family with sequence similarity 80, member A                                    | FAM80A          | 284716       |
| 225999_at    | family with sequence similarity 80, member B                                    | FAM80B          | 57494        |
| 242870_at    | Family with sequence similarity 80, member B                                    | FAM80B          | 57494        |
| 235349_at    | family with sequence similarity 82, member A                                    | FAM82A          | 151393       |
| 218126_at    | family with sequence similarity 82, member C                                    | FAM82C          | 55177        |
| 239586_at    | family with sequence similarity 83, member A                                    | FAM83A          | 84985        |
| 234335_s_at  | Family with sequence similarity 84, member A                                    | FAM84A          | 151354       |
| 225864_at    | family with sequence similarity 84, member B                                    | FAM84B          | 157638       |
| 1559140_at   | family with sequence similarity 87, member A                                    | FAM87A          | 100134357 ,  |
| 1563483_at   | family with sequence similarity 91, member A2                                   | FAM91A2         | 57234        |
| 235391_at    | family with sequence similarity 92, member A1                                   | FAM92A1         | 137392       |
| 224779_s_at  | family with sequence similarity 96, member A                                    | FAM96A          | 84191        |
| 239487_at    | Family with sequence similarity 98, member A                                    | FAM98A          | 25940        |
| 241832_at    | family with sequence similarity 98, member A                                    | FAM98A          | 25940        |
| 1564637_a_at | family with sequence similarity 98, member B                                    | FAM98B          | 283742       |
| 225086_at    | Family with sequence similarity 98, member B                                    | FAM98B          | 283742       |
| 205189_s_at  | Fanconi anemia, complementation group C                                         | FANCC           | 2176         |
| 1568889_at   | Fanconi anemia, complementation group D2                                        | FANCD2          | 2177         |
| 223785_at    | Fanconi anemia, complementation group I                                         | FANCI           | 55215        |
| 213007_at    | Fanconi anemia, complementation group I                                         | FANCI           | 55215        |
| 232063_x_at  | phenylalanyl-tRNA synthetase, beta subunit                                      | FARSB           | 10056        |
| 215719_x_at  | Fas (TNF receptor superfamily, member 6)                                        | FAS             | 355          |

|              |                                                                                                                         |                   |                  |
|--------------|-------------------------------------------------------------------------------------------------------------------------|-------------------|------------------|
| 204780_s_at  | Fas (TNF receptor superfamily, member 6)                                                                                | FAS               | 355              |
| 210865_at    | Fas ligand (TNF superfamily, member 6)                                                                                  | FASLG             | 356              |
| 214114_x_at  | Fas-activated serine/threonine kinase                                                                                   | FASTK             | 10922            |
| 219200_at    | FAST kinase domains 3                                                                                                   | FASTKD3           | 79072            |
| 219016_at    | FAST kinase domains 5                                                                                                   | FASTKD5           | 60493            |
| 236029_at    | FAT tumor suppressor homolog 3 (Drosophila)                                                                             | FAT3              | 120114           |
| 219427_at    | FAT tumor suppressor homolog 4 (Drosophila)                                                                             | FAT4              | 79633            |
| 200019_s_at  | Finkel-Biskis-Reilly murine sarcoma virus (FBR-MuSV) ubiquitously expressed                                             | FAU               | 2197             |
| 211623_s_at  | fibrillarin                                                                                                             | FBL               | 2091             |
| 235318_at    | fibrillin 1                                                                                                             | FBN1              | 2200             |
| 203184_at    | fibrillin 2 (congenital contractural arachnodactyly)                                                                    | FBN2              | 2201             |
| 1554737_at   | fibrillin 2 (congenital contractural arachnodactyly)                                                                    | FBN2              | 2201             |
| 242217_s_at  | fibrosin                                                                                                                | FBRS              | 64319            |
| 238771_at    | Fibrosin                                                                                                                | FBRS              | 100129899        |
| 208988_at    | F-box and leucine-rich repeat protein 11                                                                                | FBXL11            | 22992            |
| 208989_s_at  | F-box and leucine-rich repeat protein 11                                                                                | FBXL11            | 22992            |
| 1556770_a_at | F-box and leucine-rich repeat protein 13                                                                                | FBXL13            | 222235           |
| 1553798_a_at | F-box and leucine-rich repeat protein 13                                                                                | FBXL13            | 222235           |
| 242034_at    | F-box and leucine-rich repeat protein 17                                                                                | FBXL17            | 64839            |
| 233087_at    | F-box and leucine-rich repeat protein 17                                                                                | FBXL17            | 64839            |
| 227203_at    | F-box and leucine-rich repeat protein 17                                                                                | FBXL17            | 64839            |
| 213249_at    | F-box and leucine-rich repeat protein 7                                                                                 | FBXL7             | 23194            |
| 232693_s_at  | zinc finger protein 395 /// F-box protein 16                                                                            | FBXO16 /// ZNF395 | 157574 /// 55893 |
| 223216_x_at  | zinc finger protein 395 /// F-box protein 16                                                                            | FBXO16 /// ZNF395 | 55893            |
| 225734_at    | F-box protein 22                                                                                                        | FBXO22            | 26263            |
| 229955_at    | F-box protein 3                                                                                                         | FBXO3             | 26273            |
| 218539_at    | F-box protein 34                                                                                                        | FBXO34            | 55030            |
| 221813_at    | F-box protein 42                                                                                                        | FBXO42            | 54455            |
| 221812_at    | F-box protein 42                                                                                                        | FBXO42            | 54455            |
| 47773_at     | F-box protein 42                                                                                                        | FBXO42            | 54455            |
| 225100_at    | F-box protein 45                                                                                                        | FBXO45            | 200933           |
| 225099_at    | F-box protein 45                                                                                                        | FBXO45            | 200933           |
| 234863_x_at  | F-box protein 5                                                                                                         | FBXO5             | 26271            |
| 218875_s_at  | F-box protein 5                                                                                                         | FBXO5             | 26271            |
| 231769_at    | F-box protein 6                                                                                                         | FBXO6             | 26270            |
| 243649_at    | F-box protein 7                                                                                                         | FBXO7             | 25793            |
| 1554806_a_at | F-box protein 8                                                                                                         | FBXO8             | 26269            |
| 212987_at    | F-box protein 9                                                                                                         | FBXO9             | 26268            |
| 238472_at    | F-box protein 9                                                                                                         | FBXO9             | 26268            |
| 1559094_at   | F-box protein 9                                                                                                         | FBXO9             | 26268            |
| 212991_at    | F-box protein 9                                                                                                         | FBXO9             | 26268            |
| 1559096_x_at | F-box protein 9                                                                                                         | FBXO9             | 26268            |
| 1566509_s_at | F-box protein 9                                                                                                         | FBXO9             | 26268            |
| 215600_x_at  | F-box and WD repeat domain containing 12                                                                                | FBXW12            | 285231           |
| 223419_at    | F-box and WD repeat domain containing 9                                                                                 | FBXW9             | 84261            |
| 211816_x_at  | Fc fragment of IgA, receptor for                                                                                        | FCAR              | 2204             |
| 211307_s_at  | Fc fragment of IgA, receptor for                                                                                        | FCAR              | 2204             |
| 207674_at    | Fc fragment of IgA, receptor for                                                                                        | FCAR              | 2204             |
| 211306_s_at  | Fc fragment of IgA, receptor for                                                                                        | FCAR              | 2204             |
| 211305_x_at  | Fc fragment of IgA, receptor for                                                                                        | FCAR              | 2204             |
| 211734_s_at  | Fc fragment of IgE, high affinity I, receptor for; alpha polypeptide                                                    | FCER1A            | 2205             |
| 1554899_s_at | Fc fragment of IgE, high affinity I, receptor for; gamma polypeptide                                                    | FCER1G            | 2207             |
| 204232_at    | Fc fragment of IgE, high affinity I, receptor for; gamma polypeptide                                                    | FCER1G            | 2207             |
| 1565673_at   | Fc fragment of IgG, low affinity IIa, receptor (CD32)                                                                   | FCGR2A            | 2212             |
| 203561_at    | Fc fragment of IgG, low affinity IIa, receptor (CD32)                                                                   | FCGR2A            | 2212             |
| 210889_s_at  | Fc fragment of IgG, low affinity IIb, receptor (CD32) /// Fc fragment of IgG, low affinity IIc, receptor for (CD32)     | FCGR2B /// FCGR2C | 2213             |
| 210992_x_at  | Fc fragment of IgG, low affinity IIc, receptor for (CD32)                                                               | FCGR2C            | 9103             |
| 211395_x_at  | Fc fragment of IgG, low affinity IIc, receptor for (CD32)                                                               | FCGR2C            | 9103             |
| 204006_s_at  | Fc fragment of IgG, low affinity IIIa, receptor (CD16a) /// Fc fragment of IgG, low affinity IIIb, receptor for (CD16b) | FCGR3A /// FCGR3B | 2214 /// 2215    |
| 218831_s_at  | Fc fragment of IgG, receptor, transporter, alpha                                                                        | FCGRT             | 2217             |
| 213669_at    | FCH domain only 1                                                                                                       | FCHO1             | 23149            |
| 1555153_s_at | FCH domain only 2                                                                                                       | FCHO2             | 115548           |
| 203620_s_at  | FCH and double SH3 domains 2                                                                                            | FCHSD2            | 9873             |

|              |                                                                                     |                          |              |
|--------------|-------------------------------------------------------------------------------------|--------------------------|--------------|
| 205237_at    | ficolin (collagen/fibrinogen domain containing) 1                                   | <i>FCN1</i>              | 2219         |
| 1563674_at   | Fc receptor-like 2                                                                  | <i>FCRL2</i>             | 79368        |
| 224403_at    | Fc receptor-like 4                                                                  | <i>FCRL4</i>             | 83417        |
| 224402_s_at  | Fc receptor-like 4                                                                  | <i>FCRL4</i>             | 83417        |
| 235372_at    | Fc receptor-like A                                                                  | <i>FCRLA</i>             | 84824        |
| 238452_at    | Fc receptor-like B                                                                  | <i>FCRLB</i>             | 127943       |
| 208647_at    | farnesyl-diphosphate farnesyltransferase 1                                          | <i>FDFT1</i>             | 2222         |
| 223175_s_at  | fem-1 homolog a (C. elegans)                                                        | <i>FEM1A</i>             | 55527        |
| 213341_at    | fem-1 homolog c (C. elegans)                                                        | <i>FEM1C</i>             | 56929        |
| 204767_s_at  | flap structure-specific endonuclease 1                                              | <i>FEN1</i>              | 2237         |
| 205418_at    | feline sarcoma oncogene                                                             | <i>FES</i>               | 2242         |
| 203562_at    | fasciculation and elongation protein zeta 1 (zygin I)                               | <i>FEZ1</i>              | 9638         |
| 221385_s_at  | free fatty acid receptor 3 /// G protein-coupled receptor 42 /// similar to Free fa | <i>FFAR3 /// GPR42</i>   | 2865 /// 286 |
| 1555407_s_at | FYVE, RhoGEF and PH domain containing 3                                             | <i>FGD3</i>              | 89846        |
| 227811_at    | FYVE, RhoGEF and PH domain containing 3                                             | <i>FGD3</i>              | 89846        |
| 230559_x_at  | FYVE, RhoGEF and PH domain containing 4                                             | <i>FGD4</i>              | 121512       |
| 230288_at    | fibroblast growth factor 14                                                         | <i>FGF14</i>             | 2259         |
| 231523_at    | fibroblast growth factor 14                                                         | <i>FGF14</i>             | 2259         |
| 220394_at    | fibroblast growth factor 20                                                         | <i>FGF20</i>             | 26281        |
| 205782_at    | fibroblast growth factor 7 (keratinocyte growth factor)                             | <i>FGF7</i>              | 2252         |
| 1555103_s_at | fibroblast growth factor 7 (keratinocyte growth factor)                             | <i>FGF7</i>              | 2252         |
| 1554741_s_at | fibroblast growth factor 7 (keratinocyte growth factor) /// keratinocyte growth f   | <i>FGF7 /// KGFLP1</i>   | 2252 /// 38; |
| 223836_at    | fibroblast growth factor binding protein 2                                          | <i>FGFBP2</i>            | 83888        |
| 205588_s_at  | FGFR1 oncogene partner                                                              | <i>FGFR1OP</i>           | 11116        |
| 214124_x_at  | FGFR1 oncogene partner                                                              | <i>FGFR1OP</i>           | ---          |
| 1568678_s_at | FGFR1 oncogene partner                                                              | <i>FGFR1OP</i>           | 11116        |
| 1556283_s_at | FGFR1 oncogene partner 2                                                            | <i>FGFR1OP2</i>          | 26127        |
| 223262_s_at  | FGFR1 oncogene partner 2                                                            | <i>FGFR1OP2</i>          | 26127        |
| 223263_s_at  | FGFR1 oncogene partner 2                                                            | <i>FGFR1OP2</i>          | 26127        |
| 243619_at    | FGFR1 oncogene partner 2                                                            | <i>FGFR1OP2</i>          | 26127        |
| 204834_at    | fibrinogen-like 2                                                                   | <i>FGL2</i>              | 10875        |
| 227265_at    | fibrinogen-like 2                                                                   | <i>FGL2</i>              | 10875        |
| 208438_s_at  | Gardner-Rasheed feline sarcoma viral (v-fgr) oncogene homolog                       | <i>FGR</i>               | 2268         |
| 214170_x_at  | fumarate hydratase                                                                  | <i>FH</i>                | 2271         |
| 226769_at    | fin bud initiation factor                                                           | <i>FIBIN</i>             | 387758       |
| 203656_at    | FIG4 homolog (S. cerevisiae)                                                        | <i>FIG4</i>              | 9896         |
| 242828_at    | Fidgetin                                                                            | <i>FIGN</i>              | 55137        |
| 1552921_a_at | fidgetin-like 1                                                                     | <i>FIGNL1</i>            | 63979        |
| 1570515_a_at | filamin A interacting protein 1                                                     | <i>FILIP1</i>            | 27145        |
| 218034_at    | fission 1 (mitochondrial outer membrane) homolog (S. cerevisiae)                    | <i>FIS1</i>              | 51024        |
| 31826_at     | FK506 binding protein 15, 133kDa                                                    | <i>FKBP15</i>            | 23307        |
| 76897_s_at   | FK506 binding protein 15, 133kDa                                                    | <i>FKBP15</i>            | 23307        |
| 212663_at    | FK506 binding protein 15, 133kDa                                                    | <i>FKBP15</i>            | 23307        |
| 200709_at    | FK506 binding protein 1A, 12kDa                                                     | <i>FKBP1A</i>            | 2280         |
| 203391_at    | FK506 binding protein 2, 13kDa                                                      | <i>FKBP2</i>             | 2286         |
| 224840_at    | FK506 binding protein 5                                                             | <i>FKBP5</i>             | 2289         |
| 224856_at    | FK506 binding protein 5                                                             | <i>FKBP5</i>             | 2289         |
| 223667_at    | FK506 binding protein 7                                                             | <i>FKBP7</i>             | 51661        |
| 224002_s_at  | FK506 binding protein 7                                                             | <i>FKBP7</i>             | 51661        |
| 40850_at     | FK506 binding protein 8, 38kDa                                                      | <i>FKBP8</i>             | 23770        |
| 211454_x_at  | FKSG49                                                                              | <i>FKSG49</i>            | 400949       |
| 224288_x_at  | FKSG49                                                                              | <i>FKSG49</i>            | 400949       |
| 224284_x_at  | FKSG49                                                                              | <i>FKSG49</i>            | 400949       |
| 208120_x_at  | FKSG49 /// hypothetical protein LOC730444                                           | <i>FKSG49 /// LOC730</i> | 400949       |
| 224289_s_at  | FKSG83                                                                              | <i>FKSG83</i>            | 83954        |
| 1552664_at   | folliculin                                                                          | <i>FLCN</i>              | 201163       |
| 215645_at    | Folliculin                                                                          | <i>FLCN</i>              | 201163       |
| 212025_s_at  | flightless I homolog (Drosophila)                                                   | <i>FLII</i>              | 2314         |
| 222065_s_at  | flightless I homolog (Drosophila)                                                   | <i>FLII</i>              | 2314         |
| 212024_x_at  | flightless I homolog (Drosophila)                                                   | <i>FLII</i>              | 2314         |
| 205510_s_at  | hypothetical protein FLJ10038                                                       | <i>FLJ10038</i>          | 55056        |
| 227448_at    | hypothetical protein FLJ10154                                                       | <i>FLJ10154</i>          | 55082        |
| 218920_at    | hypothetical protein FLJ10404                                                       | <i>FLJ10404</i>          | 54540        |

|              |                                                                                   |                    |           |
|--------------|-----------------------------------------------------------------------------------|--------------------|-----------|
| 219718_at    | hypothetical protein FLJ10986                                                     | FLJ10986           | 55277     |
| 218610_s_at  | hypothetical protein FLJ11151                                                     | FLJ11151           | 55313     |
| 222811_at    | hypothetical protein FLJ11171                                                     | FLJ11171           | 55783     |
| 218513_at    | hypothetical protein FLJ11184                                                     | FLJ11184           | 55319     |
| 217342_x_at  | hypothetical protein FLJ11292                                                     | FLJ11292           | 55338     |
| 220828_s_at  | hypothetical protein FLJ11292                                                     | FLJ11292           | 55338     |
| 243284_at    | hypothetical protein FLJ11506                                                     | FLJ11506           | 79719     |
| 202852_s_at  | hypothetical protein FLJ11506                                                     | FLJ11506           | 79719     |
| 233204_at    | similar to hypothetical protein MGC40405                                          | FLJ11903           | 728153    |
| 220465_at    | hypothetical protein FLJ12355                                                     | FLJ12355           | 80054     |
| 233008_at    | hypothetical gene supported by AK022887; AK056417                                 | FLJ12825           | 440101    |
| 218994_s_at  | stromal antigen 3-like                                                            | FLJ13195           | 64940     |
| 244193_at    | hypothetical protein FLJ13236                                                     | FLJ13236           | 79962     |
| 242584_at    | hypothetical protein FLJ13305                                                     | FLJ13305           | 84140     |
| 1559369_at   | hypothetical protein FLJ13611                                                     | FLJ13611           | 80006     |
| 235158_at    | hypothetical protein FLJ14803                                                     | FLJ14803           | 84928     |
| 1569077_x_at | FLJ16287 protein                                                                  | FLJ16287           | 162962    |
| 243077_at    | hypothetical LOC641928                                                            | FLJ16734           | 641928    |
| 218986_s_at  | hypothetical protein FLJ20035                                                     | FLJ20035           | 55601     |
| 225325_at    | FLJ20160 protein                                                                  | FLJ20160           | 54842     |
| 226171_at    | hypothetical protein FLJ20209                                                     | FLJ20209           | 57245     |
| 217899_at    | hypothetical protein FLJ20254                                                     | FLJ20254           | 54867     |
| 218035_s_at  | RNA-binding protein                                                               | FLJ20273           | 54502     |
| 222496_s_at  | RNA-binding protein                                                               | FLJ20273           | 54502     |
| 52731_at     | hypothetical protein FLJ20294                                                     | FLJ20294           | 55626     |
| 209672_s_at  | hypothetical protein FLJ20323                                                     | FLJ20323           | 54468     |
| 234216_at    | hypothetical gene supported by AK025061                                           | FLJ21408           | 400512    |
| 65635_at     | endo-beta-N-acetylglucosaminidase                                                 | FLJ21865           | 64772     |
| 229222_at    | FLJ21963 protein                                                                  | FLJ21963           | 79611     |
| 228728_at    | hypothetical protein FLJ21986                                                     | FLJ21986           | 79974     |
| 64900_at     | hypothetical protein FLJ22167                                                     | FLJ22167           | 79583     |
| 219182_at    | hypothetical protein FLJ22167                                                     | FLJ22167           | 79583     |
| 64438_at     | hypothetical protein FLJ22222                                                     | FLJ22222           | 79701     |
| 218454_at    | hypothetical protein FLJ22662                                                     | FLJ22662           | 79887     |
| 233604_at    | hypothetical gene supported by AK026416                                           | FLJ22763           | 401081    |
| 217016_x_at  | hypothetical LOC389177                                                            | FLJ23172           | 100130245 |
| 231252_at    | hypothetical protein FLJ23861                                                     | FLJ23861           | 151050    |
| 1557003_at   | hypothetical protein FLJ25439                                                     | FLJ25439           | 153657    |
| 211034_s_at  | AF-1 specific protein phosphatase                                                 | FLJ30092           | 283450    |
| 226809_at    | similar to hypothetical protein A230046P18; cDNA sequence BC055759 /// simil      | FLJ30428 /// LOC7: | 150519    |
| 1552942_at   | hypothetical protein FLJ30430                                                     | FLJ30430           | 149373    |
| 1553797_a_at | hypothetical locus FLJ30594                                                       | FLJ30594           | 150622    |
| 1559585_at   | hypothetical protein FLJ31033                                                     | FLJ31033           | 91351     |
| 228152_s_at  | hypothetical protein FLJ31033                                                     | FLJ31033           | 91351     |
| 239432_at    | hypothetical protein FLJ31306                                                     | FLJ31306           | 379025    |
| 228149_at    | hypothetical protein FLJ31818                                                     | FLJ31818           | 154743    |
| 232803_at    | hypothetical protein FLJ31958                                                     | FLJ31958           | 143153    |
| 223443_s_at  | hypothetical protein FLJ32065                                                     | FLJ32065           | 201283    |
| 235292_at    | hypothetical protein LOC643977                                                    | FLJ32255           | 643977    |
| 1554067_at   | hypothetical protein FLJ32549                                                     | FLJ32549           | 144577    |
| 213737_x_at  | golgi autoantigen, golgin subfamily a, 8G /// golgi autoantigen, golgin subfamily | FLJ32679 /// GOLG  | 283796    |
| 1553472_at   | hypothetical protein FLJ32955                                                     | FLJ32955           | 150596    |
| 242295_at    | hypothetical protein FLJ32955                                                     | FLJ32955           | 150596    |
| 1557212_at   | hypothetical gene supported by AK057627; BC031275; BC045736                       | FLJ33065           | 440952    |
| 1563969_at   | FLJ33360 protein                                                                  | FLJ33360           | 401172    |
| 1556722_a_at | hypothetical protein FLJ33706                                                     | FLJ33706           | 284805    |
| 1564207_at   | hypothetical protein FLJ35390                                                     | FLJ35390           | 255031    |
| 1562484_at   | hypothetical protein FLJ35848                                                     | FLJ35848           | 284071    |
| 235235_s_at  | FLJ36874 protein                                                                  | FLJ36874           | 219988    |
| 235234_at    | FLJ36874 protein                                                                  | FLJ36874           | 219988    |
| 225468_at    | FLJ36874 protein                                                                  | FLJ36874           | 219988    |
| 225466_at    | FLJ36874 protein                                                                  | FLJ36874           | 219988    |
| 1560654_at   | hypothetical protein FLJ37201                                                     | FLJ37201           | 283011    |

|              |                                                                                   |                        |              |
|--------------|-----------------------------------------------------------------------------------|------------------------|--------------|
| 1553362_at   | hypothetical protein FLJ37357                                                     | FLJ37357               | 1768 /// 200 |
| 244065_at    | similar to Contactin-associated protein-like 3 precursor (Cell recognition molecu | FLJ37512               | 643827       |
| 1558579_at   | hypothetical LOC642691                                                            | FLJ37786               | 642691       |
| 227298_at    | hypothetical gene supported by AK095117                                           | FLJ37798               | 401264       |
| 1559964_at   | FLJ38717 protein                                                                  | FLJ38717               | 401261       |
| 230999_at    | Hypothetical gene supported by AK096370                                           | FLJ39051               | 399972       |
| 1561371_at   | hypothetical gene supported by AK096399                                           | FLJ39080               | 441355       |
| 242546_at    | hypothetical LOC642477                                                            | FLJ39632               | 642477       |
| 231882_at    | hypothetical LOC642477                                                            | FLJ39632               | 100131139 ,  |
| 1553145_at   | hypothetical FLJ39653                                                             | FLJ39653               | 202020       |
| 243565_at    | hypothetical protein FLJ39660                                                     | FLJ39660               | 284992       |
| 1556457_s_at | hypothetical FLJ39739                                                             | FLJ39739               | 388685       |
| 213212_x_at  | hypothetical protein LOC161527 /// golgi autoantigen, golgin subfamily a-like p   | FLJ40113 /// LOC161527 | 374650 /// 4 |
| 226583_at    | FLJ40142 protein                                                                  | FLJ40142               | 400073       |
| 1561846_s_at | hypothetical protein FLJ40176                                                     | FLJ40176               | 121951       |
| 1556183_at   | similar to protein immuno-reactive with anti-PTH polyclonal antibodies            | FLJ40330               | 645784       |
| 244395_at    | hypothetical gene supported by AK123449; BX641014                                 | FLJ41455               | 441441       |
| 1556695_a_at | Hypothetical gene supported by AK124699                                           | FLJ42709               | 441094       |
| 237591_at    | FLJ42957 protein                                                                  | FLJ42957               | 400077       |
| 1563369_at   | FLJ42957 protein                                                                  | FLJ42957               | 400077       |
| 238986_at    | hypothetical protein FLJ43663                                                     | FLJ43663               | 378805       |
| 240028_at    | FLJ44048 protein                                                                  | FLJ44048               | 401024       |
| 215057_at    | Hypothetical protein FLJ44451                                                     | FLJ44451               | ---          |
| 1569191_at   | similar to zinc finger protein 91                                                 | FLJ44894               | 664701       |
| 243709_at    | hypothetical protein FLJ90709                                                     | FLJ90709               | 153129       |
| 235241_at    | hypothetical protein FLJ90709                                                     | FLJ90709               | 153129       |
| 200859_x_at  | filamin A, alpha (actin binding protein 280)                                      | FLNA                   | 2316         |
| 213746_s_at  | filamin A, alpha (actin binding protein 280)                                      | FLNA                   | 2316         |
| 210142_x_at  | flotillin 1                                                                       | FLOT1                  | 10211        |
| 208748_s_at  | flotillin 1                                                                       | FLOT1                  | 10211        |
| 208749_x_at  | flotillin 1                                                                       | FLOT1                  | 10211        |
| 211299_s_at  | flotillin 2                                                                       | FLOT2                  | 2319         |
| 201350_at    | flotillin 2                                                                       | FLOT2                  | 2319         |
| 219250_s_at  | fibronectin leucine rich transmembrane protein 3                                  | FLRT3                  | 23767        |
| 222853_at    | fibronectin leucine rich transmembrane protein 3                                  | FLRT3                  | 23767        |
| 204406_at    | fms-related tyrosine kinase 1 (vascular endothelial growth factor/vascular perm   | FLT1                   | 2321         |
| 230946_at    | Formin 2                                                                          | FMN2                   | 56776        |
| 223618_at    | formin 2                                                                          | FMN2                   | 56776        |
| 235881_at    | Formin-like 2                                                                     | FMNL2                  | 114793       |
| 238823_at    | formin-like 3                                                                     | FMNL3                  | 91010        |
| 228268_at    | flavin containing monooxygenase 2 (non-functional)                                | FMO2                   | 2327         |
| 1569688_at   | flavin containing monooxygenase 5                                                 | FMO5                   | 2330         |
| 205776_at    | flavin containing monooxygenase 5                                                 | FMO5                   | 2330         |
| 202709_at    | fibromodulin                                                                      | FMOD                   | 2331         |
| 215245_x_at  | fragile X mental retardation 1                                                    | FMR1                   | 2332         |
| 203689_s_at  | fragile X mental retardation 1                                                    | FMR1                   | 2332         |
| 214702_at    | fibronectin 1                                                                     | FN1                    | 2335         |
| 1558199_at   | fibronectin 1                                                                     | FN1                    | 2335         |
| 215017_s_at  | formin binding protein 1-like                                                     | FNBP1L                 | 54874        |
| 202304_at    | fibronectin type III domain containing 3A                                         | FNDC3A                 | 22862        |
| 215910_s_at  | fibronectin type III domain containing 3A                                         | FNDC3A                 | 22862        |
| 241611_s_at  | fibronectin type III domain containing 3A                                         | FNDC3A                 | 22862        |
| 225032_at    | fibronectin type III domain containing 3B                                         | FNDC3B                 | 64778        |
| 222693_at    | fibronectin type III domain containing 3B                                         | FNDC3B                 | 64778        |
| 218618_s_at  | fibronectin type III domain containing 3B                                         | FNDC3B                 | 64778        |
| 222692_s_at  | fibronectin type III domain containing 3B                                         | FNDC3B                 | 64778        |
| 229865_at    | fibronectin type III domain containing 3B                                         | FNDC3B                 | 64778        |
| 1569490_at   | fibronectin type III domain containing 3B                                         | FNDC3B                 | 64778        |
| 242029_at    | Fibronectin type III domain containing 3B                                         | FNDC3B                 | 64778        |
| 228768_at    | folliculin interacting protein 1                                                  | FNIP1                  | 96459        |
| 228250_at    | folliculin interacting protein 1                                                  | FNIP1                  | 96459        |
| 223997_at    | folliculin interacting protein 1                                                  | FNIP1                  | 96459        |
| 1559060_a_at | Folliculin interacting protein 1                                                  | FNIP1                  | 96459        |

|             |                                                                         |                        |        |
|-------------|-------------------------------------------------------------------------|------------------------|--------|
| 200090_at   | farnesyltransferase, CAAX box, alpha                                    | <i>FNTA</i>            | 2339   |
| 209471_s_at | farnesyltransferase, CAAX box, alpha                                    | <i>FNTA</i>            | 2339   |
| 217487_x_at | folate hydrolase (prostate-specific membrane antigen) 1                 | <i>FOLH1</i>           | 2346   |
| 209189_at   | v-fos FBJ murine osteosarcoma viral oncogene homolog                    | <i>FOS</i>             | 2353   |
| 218881_s_at | FOS-like antigen 2                                                      | <i>FOSL2</i>           | 2355   |
| 205409_at   | FOS-like antigen 2                                                      | <i>FOSL2</i>           | 2355   |
| 225262_at   | FOS-like antigen 2                                                      | <i>FOSL2</i>           | 2355   |
| 218880_at   | FOS-like antigen 2                                                      | <i>FOSL2</i>           | 2355   |
| 206377_at   | forkhead box F2                                                         | <i>FOXF2</i>           | 2295   |
| 226715_at   | forkhead box K1                                                         | <i>FOXK1</i>           | 221937 |
| 226224_at   | forkhead box K2                                                         | <i>FOXK2</i>           | 3607   |
| 226711_at   | forkhead box N2                                                         | <i>FOXN2</i>           | 3344   |
| 222494_at   | forkhead box N3                                                         | <i>FOXN3</i>           | 1112   |
| 218031_s_at | forkhead box N3                                                         | <i>FOXN3</i>           | 1112   |
| 205022_s_at | forkhead box N3                                                         | <i>FOXN3</i>           | 1112   |
| 205021_s_at | forkhead box N3                                                         | <i>FOXN3</i>           | 1112   |
| 224891_at   | forkhead box O3                                                         | <i>FOXO3</i>           | 2309   |
| 204132_s_at | forkhead box O3                                                         | <i>FOXO3</i>           | 2309   |
| 204131_s_at | forkhead box O3                                                         | <i>FOXO3</i>           | 2309   |
| 224889_at   | forkhead box O3                                                         | <i>FOXO3</i>           | 2309   |
| 210655_s_at | forkhead box O3                                                         | <i>FOXO3</i>           | 2309   |
| 217399_s_at | forkhead box O3                                                         | <i>FOXO3</i>           | 2309   |
| 1558996_at  | forkhead box P1                                                         | <i>FOXP1</i>           | 27086  |
| 224837_at   | forkhead box P1                                                         | <i>FOXP1</i>           | 27086  |
| 235444_at   | forkhead box P1                                                         | <i>FOXP1</i>           | 27086  |
| 224838_at   | forkhead box P1                                                         | <i>FOXP1</i>           | 27086  |
| 1555352_at  | forkhead box P2                                                         | <i>FOXP2</i>           | 93986  |
| 205140_at   | fucose-1-phosphate guanylyltransferase                                  | <i>FPGT</i>            | 8790   |
| 205119_s_at | formyl peptide receptor 1                                               | <i>FPR1</i>            | 2357   |
| 210772_at   | formyl peptide receptor-like 1                                          | <i>FPRL1</i>           | 2358   |
| 210773_s_at | formyl peptide receptor-like 1                                          | <i>FPRL1</i>           | 2358   |
| 219889_at   | frequently rearranged in advanced T-cell lymphomas                      | <i>FRAT1</i>           | 10023  |
| 209864_at   | frequently rearranged in advanced T-cell lymphomas 2                    | <i>FRAT2</i>           | 23401  |
| 236031_x_at | FRAS1 related extracellular matrix 1                                    | <i>FREM1</i>           | ---    |
| 230645_at   | FERM domain containing 3                                                | <i>FRMD3</i>           | 257019 |
| 229893_at   | FERM domain containing 3                                                | <i>FRMD3</i>           | 257019 |
| 225167_at   | FERM domain containing 4A                                               | <i>FRMD4A</i>          | 55691  |
| 213056_at   | FERM domain containing 4B                                               | <i>FRMD4B</i>          | 23150  |
| 239290_at   | FERM and PDZ domain containing 4                                        | <i>FRMPD4</i>          | 9758   |
| 1562650_at  | FRY-like                                                                | <i>FRYL</i>            | 285527 |
| 212548_s_at | FRY-like                                                                | <i>FRYL</i>            | 285527 |
| 242807_at   | fibronectin type III and SPRY domain containing 1-like                  | <i>FSD1L</i>           | 83856  |
| 230904_at   | fibronectin type III and SPRY domain containing 1-like                  | <i>FSD1L</i>           | 83856  |
| 226847_at   | folliculin                                                              | <i>FST</i>             | 10468  |
| 214211_at   | ferritin, heavy polypeptide 1 /// ferritin, heavy polypeptide-like 16   | <i>FTH1 /// FTHL16</i> | 2495   |
| 218356_at   | FtsJ homolog 2 (E. coli)                                                | <i>FTSJ2</i>           | 29960  |
| 218103_at   | FtsJ homolog 3 (E. coli)                                                | <i>FTSJ3</i>           | 117246 |
| 212847_at   | Far upstream element (FUSE) binding protein 1                           | <i>FUBP1</i>           | 8880   |
| 214093_s_at | far upstream element (FUSE) binding protein 1                           | <i>FUBP1</i>           | 8880   |
| 202838_at   | fucosidase, alpha-L- 1, tissue                                          | <i>FUCA1</i>           | 2517   |
| 235346_at   | FUN14 domain containing 1                                               | <i>FUNDC1</i>          | 139341 |
| 230922_x_at | FUN14 domain containing 2                                               | <i>FUNDC2</i>          | ---    |
| 238551_at   | fucosyltransferase 11 (alpha (1,3) fucosyltransferase)                  | <i>FUT11</i>           | 170384 |
| 210608_s_at | fucosyltransferase 2 (secretor status included)                         | <i>FUT2</i>            | 2524   |
| 209893_s_at | fucosyltransferase 4 (alpha (1,3) fucosyltransferase, myeloid-specific) | <i>FUT4</i>            | 2526   |
| 209892_at   | fucosyltransferase 4 (alpha (1,3) fucosyltransferase, myeloid-specific) | <i>FUT4</i>            | 2526   |
| 214046_at   | fucosyltransferase 9 (alpha (1,3) fucosyltransferase)                   | <i>FUT9</i>            | 10690  |
| 201637_s_at | fragile X mental retardation, autosomal homolog 1                       | <i>FXR1</i>            | 8087   |
| 203172_at   | fragile X mental retardation, autosomal homolog 2                       | <i>FXR2</i>            | 9513   |
| 218084_x_at | FXRD domain containing ion transport regulator 5                        | <i>FXRD5</i>           | 53827  |
| 211794_at   | FYN binding protein (FYB-120/130)                                       | <i>FYB</i>             | 2533   |
| 205285_s_at | FYN binding protein (FYB-120/130)                                       | <i>FYB</i>             | 2533   |
| 227266_s_at | FYN binding protein (FYB-120/130)                                       | <i>FYB</i>             | 2533   |



|              |                                                                                |                                             |        |
|--------------|--------------------------------------------------------------------------------|---------------------------------------------|--------|
| 211795_s_at  | FYN binding protein (FYB-120/130)                                              | <i>FYB</i>                                  | 2533   |
| 216033_s_at  | FYN oncogene related to SRC, FGR, YES                                          | <i>FYN</i>                                  | 2534   |
| 210105_s_at  | FYN oncogene related to SRC, FGR, YES                                          | <i>FYN</i>                                  | 2534   |
| 212486_s_at  | FYN oncogene related to SRC, FGR, YES                                          | <i>FYN</i>                                  | 2534   |
| 203987_at    | frizzled homolog 6 (Drosophila)                                                | <i>FZD6</i>                                 | 8323   |
| 211865_s_at  | fizzy/cell division cycle 20 related 1 (Drosophila)                            | <i>FZR1</i>                                 | 51343  |
| 209416_s_at  | fizzy/cell division cycle 20 related 1 (Drosophila)                            | <i>FZR1</i>                                 | 51343  |
| 213524_s_at  | G0/G1switch 2                                                                  | <i>G0S2</i>                                 | 50486  |
| 1553024_at   | putative protein LG30                                                          | <i>G30</i>                                  | 282706 |
| 222187_x_at  | GTPase activating protein (SH3 domain) binding protein 1                       | <i>G3BP1</i>                                | 10146  |
| 201503_at    | GTPase activating protein (SH3 domain) binding protein 1                       | <i>G3BP1</i>                                | 10146  |
| 244396_at    | GTPase activating protein (SH3 domain) binding protein 1                       | <i>G3BP1</i>                                | 10146  |
| 208841_s_at  | GTPase activating protein (SH3 domain) binding protein 2                       | <i>G3BP2</i>                                | 9908   |
| 206383_s_at  | GTPase activating protein (SH3 domain) binding protein 2                       | <i>G3BP2</i>                                | 9908   |
| 208840_s_at  | GTPase activating protein (SH3 domain) binding protein 2                       | <i>G3BP2</i>                                | 9908   |
| 202275_at    | glucose-6-phosphate dehydrogenase                                              | <i>G6PD</i>                                 | 2539   |
| 202812_at    | glucosidase, alpha; acid (Pompe disease, glycogen storage disease type II)     | <i>GAA</i>                                  | 2548   |
| 225998_at    | GRB2-associated binding protein 1                                              | <i>GAB1</i>                                 | 2549   |
| 228410_at    | GRB2-associated binding protein 3                                              | <i>GAB3</i>                                 | 139716 |
| 200645_at    | GABA(A) receptor-associated protein                                            | <i>GABARAP</i>                              | 11337  |
| 208869_s_at  | GABA(A) receptor-associated protein like 1                                     | <i>GABARAPL1</i>                            | 23710  |
| 208868_s_at  | GABA(A) receptor-associated protein like 1                                     | <i>GABARAPL1</i>                            | 23710  |
| 211458_s_at  | GABA(A) receptor-associated protein like 1 /// GABA(A) receptors associated pr | <i>GABARAPL1</i> /// <i>GA</i> 23710 /// 2: |        |
| 209046_s_at  | GABA(A) receptor-associated protein-like 2                                     | <i>GABARAPL2</i>                            | 11345  |
| 1561916_at   | GA binding protein transcription factor, alpha subunit pseudogene              | <i>GABPAP</i>                               | ---    |
| 227406_at    | GA binding protein transcription factor, beta subunit 2                        | <i>GABPB2</i>                               | 2553   |
| 207014_at    | gamma-aminobutyric acid (GABA) A receptor, alpha 2                             | <i>GABRA2</i>                               | 2555   |
| 1554308_s_at | gamma-aminobutyric acid (GABA) A receptor, alpha 2                             | <i>GABRA2</i>                               | 2555   |
| 207010_at    | gamma-aminobutyric acid (GABA) A receptor, beta 1                              | <i>GABRB1</i>                               | 2560   |
| 242344_at    | gamma-aminobutyric acid (GABA) A receptor, beta 2                              | <i>GABRB2</i>                               | 2561   |
| 1557122_s_at | gamma-aminobutyric acid (GABA) A receptor, beta 2                              | <i>GABRB2</i>                               | 2561   |
| 1561316_at   | Gamma-aminobutyric acid (GABA) A receptor, beta 3                              | <i>GABRB3</i>                               | ---    |
| 229724_at    | gamma-aminobutyric acid (GABA) A receptor, beta 3                              | <i>GABRB3</i>                               | 2562   |
| 1552943_at   | gamma-aminobutyric acid (GABA) A receptor, gamma 1                             | <i>GABRG1</i>                               | 2565   |
| 1568612_at   | gamma-aminobutyric acid (GABA) A receptor, gamma 2                             | <i>GABRG2</i>                               | 2566   |
| 209305_s_at  | growth arrest and DNA-damage-inducible, beta                                   | <i>GADD45B</i>                              | 4616   |
| 207574_s_at  | growth arrest and DNA-damage-inducible, beta                                   | <i>GADD45B</i>                              | 4616   |
| 209304_x_at  | growth arrest and DNA-damage-inducible, beta                                   | <i>GADD45B</i>                              | 4616   |
| 213560_at    | Growth arrest and DNA-damage-inducible, beta                                   | <i>GADD45B</i>                              | 4616   |
| 204121_at    | growth arrest and DNA-damage-inducible, gamma                                  | <i>GADD45G</i>                              | 10912  |
| 1563533_at   | glutamate decarboxylase-like 1                                                 | <i>GADL1</i>                                | 339896 |
| 40225_at     | cyclin G associated kinase                                                     | <i>GAK</i>                                  | 2580   |
| 204417_at    | galactosylceramidase                                                           | <i>GALC</i>                                 | 2581   |
| 211810_s_at  | galactosylceramidase                                                           | <i>GALC</i>                                 | 2581   |
| 202528_at    | UDP-galactose-4-epimerase                                                      | <i>GALE</i>                                 | 2582   |
| 216411_s_at  | galactokinase 2                                                                | <i>GALK2</i>                                | 2585   |
| 235256_s_at  | galactose mutarotase (aldose 1-epimerase)                                      | <i>GALM</i>                                 | 130589 |
| 203066_at    | B cell RAG associated protein                                                  | <i>GALNAC4S-6ST</i>                         | 51363  |
| 239077_at    | chondroitin sulfate GalNAcT-2                                                  | <i>GALNACT-2</i>                            | 55454  |
| 218871_x_at  | chondroitin sulfate GalNAcT-2                                                  | <i>GALNACT-2</i>                            | 55454  |
| 222235_s_at  | chondroitin sulfate GalNAcT-2                                                  | <i>GALNACT-2</i>                            | 55454  |
| 212256_at    | UDP-N-acetyl-alpha-D-galactosamine:polypeptide N-acetylgalactosaminyltransf    | <i>GALNT10</i>                              | 55568  |
| 219013_at    | UDP-N-acetyl-alpha-D-galactosamine:polypeptide N-acetylgalactosaminyltransf    | <i>GALNT11</i>                              | 63917  |
| 234472_at    | UDP-N-acetyl-alpha-D-galactosamine:polypeptide N-acetylgalactosaminyltransf    | <i>GALNT13</i>                              | 114805 |
| 217788_s_at  | UDP-N-acetyl-alpha-D-galactosamine:polypeptide N-acetylgalactosaminyltransf    | <i>GALNT2</i>                               | 2590   |
| 231832_at    | UDP-N-acetyl-alpha-D-galactosamine:polypeptide N-acetylgalactosaminyltransf    | <i>GALNT4</i>                               | 8693   |
| 237183_at    | UDP-N-acetyl-alpha-D-galactosamine:polypeptide N-acetylgalactosaminyltransf    | <i>GALNT5</i>                               | 11227  |
| 219956_at    | UDP-N-acetyl-alpha-D-galactosamine:polypeptide N-acetylgalactosaminyltransf    | <i>GALNT6</i>                               | 11226  |
| 228501_at    | UDP-N-acetyl-alpha-D-galactosamine:polypeptide N-acetylgalactosaminyltransf    | <i>GALNTL2</i>                              | 117248 |
| 220124_at    | giant axonal neuropathy (gigaxonin)                                            | <i>GAN</i>                                  | 8139   |
| 212581_x_at  | glyceraldehyde-3-phosphate dehydrogenase                                       | <i>GAPDH</i>                                | 2597   |
| 217398_x_at  | glyceraldehyde-3-phosphate dehydrogenase                                       | <i>GAPDH</i>                                | 2597   |
| 213453_x_at  | glyceraldehyde-3-phosphate dehydrogenase                                       | <i>GAPDH</i>                                | 2597   |

|              |                                                                                                                                                                                                                                          |                                                                                                                                                                           |                                         |
|--------------|------------------------------------------------------------------------------------------------------------------------------------------------------------------------------------------------------------------------------------------|---------------------------------------------------------------------------------------------------------------------------------------------------------------------------|-----------------------------------------|
| 212804_s_at  | GTPase activating protein and VPS9 domains 1                                                                                                                                                                                             | <i>GAPVD1</i>                                                                                                                                                             | 26130                                   |
| 212802_s_at  | GTPase activating protein and VPS9 domains 1                                                                                                                                                                                             | <i>GAPVD1</i>                                                                                                                                                             | 26130                                   |
| 1566272_at   | GTPase activating Rap/RanGAP domain-like 1                                                                                                                                                                                               | <i>GARNL1</i>                                                                                                                                                             | 253959                                  |
| 234923_at    | GTPase activating Rap/RanGAP domain-like 1                                                                                                                                                                                               | <i>GARNL1</i>                                                                                                                                                             | 253959                                  |
| 215162_at    | GTPase activating Rap/RanGAP domain-like 1                                                                                                                                                                                               | <i>GARNL1</i>                                                                                                                                                             | 253959                                  |
| 208693_s_at  | glycyl-tRNA synthetase                                                                                                                                                                                                                   | <i>GARS</i>                                                                                                                                                               | 2617                                    |
| 230097_at    | Phosphoribosylglycinamide formyltransferase, phosphoribosylglycinamide synthetase                                                                                                                                                        | <i>GART</i>                                                                                                                                                               | 2618                                    |
| 1598_g_at    | growth arrest-specific 6                                                                                                                                                                                                                 | <i>GAS6</i>                                                                                                                                                               | 100133684                               |
| 207704_s_at  | growth arrest-specific 7                                                                                                                                                                                                                 | <i>GAS7</i>                                                                                                                                                               | 8522                                    |
| 211067_s_at  | growth arrest-specific 7                                                                                                                                                                                                                 | <i>GAS7</i>                                                                                                                                                               | 8522                                    |
| 208138_at    | gastrin                                                                                                                                                                                                                                  | <i>GAST</i>                                                                                                                                                               | 2520                                    |
| 207954_at    | GATA binding protein 2                                                                                                                                                                                                                   | <i>GATA2</i>                                                                                                                                                              | 2624                                    |
| 209710_at    | GATA binding protein 2                                                                                                                                                                                                                   | <i>GATA2</i>                                                                                                                                                              | 2624                                    |
| 209604_s_at  | GATA binding protein 3                                                                                                                                                                                                                   | <i>GATA3</i>                                                                                                                                                              | 2625                                    |
| 214718_at    | GATA zinc finger domain containing 1                                                                                                                                                                                                     | <i>GATAD1</i>                                                                                                                                                             | 57798                                   |
| 216733_s_at  | glycine amidinotransferase (L-arginine:glycine amidinotransferase)                                                                                                                                                                       | <i>GATM</i>                                                                                                                                                               | 2628                                    |
| 1553971_a_at | opposite strand transcription unit to STAG3                                                                                                                                                                                              | <i>GATS</i>                                                                                                                                                               | 352954                                  |
| 227321_at    | opposite strand transcription unit to STAG3                                                                                                                                                                                              | <i>GATS</i>                                                                                                                                                               | 352954                                  |
| 210589_s_at  | glucosidase, beta; acid (includes glucosylceramidase) /// glucosidase, beta; acid, GBA /// GBAP                                                                                                                                          | <i>GBA</i> /// <i>GBAP</i>                                                                                                                                                | 2629 /// 2630                           |
| 203282_at    | glucan (1,4-alpha-), branching enzyme 1 (glycogen branching enzyme, Andersen)                                                                                                                                                            | <i>GBE1</i>                                                                                                                                                               | 2632                                    |
| 231577_s_at  | guanylate binding protein 1, interferon-inducible, 67kDa                                                                                                                                                                                 | <i>GBP1</i>                                                                                                                                                               | 2633                                    |
| 202270_at    | guanylate binding protein 1, interferon-inducible, 67kDa                                                                                                                                                                                 | <i>GBP1</i>                                                                                                                                                               | 2633                                    |
| 202269_x_at  | guanylate binding protein 1, interferon-inducible, 67kDa                                                                                                                                                                                 | <i>GBP1</i>                                                                                                                                                               | 2633                                    |
| 231578_at    | guanylate binding protein 1, interferon-inducible, 67kDa                                                                                                                                                                                 | <i>GBP1</i>                                                                                                                                                               | 2633                                    |
| 235175_at    | guanylate binding protein 4                                                                                                                                                                                                              | <i>GBP4</i>                                                                                                                                                               | 115361                                  |
| 229625_at    | guanylate binding protein 5                                                                                                                                                                                                              | <i>GBP5</i>                                                                                                                                                               | 115362                                  |
| 238581_at    | guanylate binding protein 5                                                                                                                                                                                                              | <i>GBP5</i>                                                                                                                                                               | 115362                                  |
| 203765_at    | grancalcin, EF-hand calcium binding protein                                                                                                                                                                                              | <i>GCA</i>                                                                                                                                                                | 25801                                   |
| 218912_at    | GRIP and coiled-coil domain containing 1                                                                                                                                                                                                 | <i>GCC1</i>                                                                                                                                                               | 79571                                   |
| 208369_s_at  | glutaryl-Coenzyme A dehydrogenase                                                                                                                                                                                                        | <i>GCDH</i>                                                                                                                                                               | 2639                                    |
| 204224_s_at  | GTP cyclohydrolase 1 (dopa-responsive dystonia)                                                                                                                                                                                          | <i>GCH1</i>                                                                                                                                                               | 2643                                    |
| 204867_at    | GTP cyclohydrolase I feedback regulator                                                                                                                                                                                                  | <i>GCHFR</i>                                                                                                                                                              | 2644                                    |
| 202922_at    | glutamate-cysteine ligase, catalytic subunit                                                                                                                                                                                             | <i>GCLC</i>                                                                                                                                                               | 2729                                    |
| 234986_at    | glutamate-cysteine ligase, modifier subunit                                                                                                                                                                                              | <i>GCLM</i>                                                                                                                                                               | ---                                     |
| 203925_at    | glutamate-cysteine ligase, modifier subunit                                                                                                                                                                                              | <i>GCLM</i>                                                                                                                                                               | 2730                                    |
| 236140_at    | glutamate-cysteine ligase, modifier subunit                                                                                                                                                                                              | <i>GCLM</i>                                                                                                                                                               | 2730                                    |
| 239761_at    | glucosaminyl (N-acetyl) transferase 1, core 2 (beta-1,6-N-acetylglucosaminyltransferase 1)                                                                                                                                               | <i>GCNT1</i>                                                                                                                                                              | 2650                                    |
| 212244_at    | glutamate receptor, ionotropic, N-methyl D-aspartate-like 1A /// GRINL1A cont. Gcom1 /// GRINL1, 145781 | <i>Gcom1</i> /// <i>GRINL1</i> , 145781 /// <i>GRINL1A</i> cont. <i>Gcom1</i> /// <i>GRINL1</i> , 145781 /// <i>GRINL1A</i> cont. <i>Gcom1</i> /// <i>GRINL1</i> , 145781 | 145781 /// 145781 /// 145781 /// 145781 |
| 212243_at    | glutamate receptor, ionotropic, N-methyl D-aspartate-like 1A /// GRINL1A cont. Gcom1 /// GRINL1, 145781 /// GRINL1A cont. Gcom1 /// GRINL1, 145781 /// GRINL1A cont. Gcom1 /// GRINL1, 145781                                            | <i>Gcom1</i> /// <i>GRINL1</i> , 145781 /// <i>GRINL1A</i> cont. <i>Gcom1</i> /// <i>GRINL1</i> , 145781                                                                  | 145781 /// 145781 /// 145781 /// 145781 |
| 213129_s_at  | glycine cleavage system protein H (aminomethyl carrier) /// similar to Glycine cleavage system protein H (aminomethyl carrier) /// LOC65404                                                                                              | <i>GCSH</i> /// <i>LOC65404</i>                                                                                                                                           | 2653 /// 730                            |
| 224209_s_at  | guanine deaminase                                                                                                                                                                                                                        | <i>GDA</i>                                                                                                                                                                | 9615                                    |
| 1569555_at   | guanine deaminase                                                                                                                                                                                                                        | <i>GDA</i>                                                                                                                                                                | 9615                                    |
| 219473_at    | ganglioside induced differentiation associated protein 2                                                                                                                                                                                 | <i>GDAP2</i>                                                                                                                                                              | 54834                                   |
| 1554591_at   | Gene differentially expressed in prostate                                                                                                                                                                                                | <i>GDEP</i>                                                                                                                                                               | 118425                                  |
| 231096_at    | gene differentially expressed in prostate                                                                                                                                                                                                | <i>GDEP</i>                                                                                                                                                               | 118425                                  |
| 201864_at    | GDP dissociation inhibitor 1                                                                                                                                                                                                             | <i>GDI1</i>                                                                                                                                                               | 2664                                    |
| 200008_s_at  | GDP dissociation inhibitor 2                                                                                                                                                                                                             | <i>GDI2</i>                                                                                                                                                               | 2665                                    |
| 1555606_a_at | glycerophosphodiester phosphodiesterase domain containing 1                                                                                                                                                                              | <i>GDPD1</i>                                                                                                                                                              | 284161                                  |
| 225161_at    | G elongation factor, mitochondrial 1                                                                                                                                                                                                     | <i>GFM1</i>                                                                                                                                                               | 85476                                   |
| 225153_at    | G elongation factor, mitochondrial 1                                                                                                                                                                                                     | <i>GFM1</i>                                                                                                                                                               | 85476                                   |
| 231918_s_at  | G elongation factor, mitochondrial 2                                                                                                                                                                                                     | <i>GFM2</i>                                                                                                                                                               | 84340                                   |
| 231917_at    | G elongation factor, mitochondrial 2                                                                                                                                                                                                     | <i>GFM2</i>                                                                                                                                                               | 84340                                   |
| 225392_at    | G elongation factor, mitochondrial 2                                                                                                                                                                                                     | <i>GFM2</i>                                                                                                                                                               | 84340                                   |
| 219821_s_at  | glucose-fructose oxidoreductase domain containing 1                                                                                                                                                                                      | <i>GFOD1</i>                                                                                                                                                              | 54438                                   |
| 1554670_at   | golgi associated, gamma adaptin ear containing, ARF binding protein 1                                                                                                                                                                    | <i>GGA1</i>                                                                                                                                                               | 26088                                   |
| 218114_at    | golgi associated, gamma adaptin ear containing, ARF binding protein 1                                                                                                                                                                    | <i>GGA1</i>                                                                                                                                                               | 26088                                   |
| 213772_s_at  | golgi associated, gamma adaptin ear containing, ARF binding protein 2                                                                                                                                                                    | <i>GGA2</i>                                                                                                                                                               | 23062                                   |
| 208915_s_at  | golgi associated, gamma adaptin ear containing, ARF binding protein 2                                                                                                                                                                    | <i>GGA2</i>                                                                                                                                                               | 23062                                   |
| 214005_at    | gamma-glutamyl carboxylase                                                                                                                                                                                                               | <i>GGCX</i>                                                                                                                                                               | 2677                                    |
| 233937_at    | gametogenetin binding protein 2                                                                                                                                                                                                          | <i>GGNBP2</i>                                                                                                                                                             | 79893                                   |
| 211417_x_at  | gamma-glutamyltransferase 1                                                                                                                                                                                                              | <i>GGT1</i>                                                                                                                                                               | 2678                                    |
| 208284_x_at  | gamma-glutamyltransferase 1                                                                                                                                                                                                              | <i>GGT1</i>                                                                                                                                                               | 2678                                    |
| 233837_at    | Gamma-glutamyltransferase 1                                                                                                                                                                                                              | <i>GGT1</i>                                                                                                                                                               | 2678                                    |

|              |                                                                                    |                              |              |
|--------------|------------------------------------------------------------------------------------|------------------------------|--------------|
| 215603_x_at  | gamma-glutamyltransferase 1 /// gamma-glutamyltransferase 3 /// gamma-glu          | <i>GGT1 /// GGT2</i>         | 2678 /// 267 |
| 228376_at    | glycoprotein, alpha-galactosyltransferase 1 /// similar to glycoprotein galactosyl | <i>GGTA1 /// LOC731.2681</i> |              |
| 209249_s_at  | growth hormone inducible transmembrane protein                                     | <i>GHITM</i>                 | 27069        |
| 1552316_a_at | GTPase, IMAP family member 1                                                       | <i>GIMAP1</i>                | 170575       |
| 1552318_at   | GTPase, IMAP family member 1                                                       | <i>GIMAP1</i>                | 170575       |
| 1552315_at   | GTPase, IMAP family member 1                                                       | <i>GIMAP1</i>                | 170575       |
| 232024_at    | GTPase, IMAP family member 2                                                       | <i>GIMAP2</i>                | 26157        |
| 219243_at    | GTPase, IMAP family member 4                                                       | <i>GIMAP4</i>                | 55303        |
| 64064_at     | GTPase, IMAP family member 5                                                       | <i>GIMAP5</i>                | 55340        |
| 219777_at    | GTPase, IMAP family member 6                                                       | <i>GIMAP6</i>                | 474344       |
| 229367_s_at  | GTPase, IMAP family member 6                                                       | <i>GIMAP6</i>                | 474344       |
| 228071_at    | GTPase, IMAP family member 7                                                       | <i>GIMAP7</i>                | 168537       |
| 235306_at    | GTPase, IMAP family member 8                                                       | <i>GIMAP8</i>                | 155038       |
| 206102_at    | GIN5 complex subunit 1 (Psf1 homolog)                                              | <i>GIN51</i>                 | 9837         |
| 211767_at    | GIN5 complex subunit 4 (Sid5 homolog)                                              | <i>GIN54</i>                 | 84296        |
| 218030_at    | G protein-coupled receptor kinase interactor 1                                     | <i>GIT1</i>                  | 28964        |
| 225558_at    | G protein-coupled receptor kinase interactor 2                                     | <i>GIT2</i>                  | 9815         |
| 209876_at    | G protein-coupled receptor kinase interactor 2                                     | <i>GIT2</i>                  | 9815         |
| 218317_x_at  | GIY-YIG domain containing 2 /// GIY-YIG domain containing 1                        | <i>GIYD1 /// GIYD2</i>       | 548593 /// 5 |
| 233334_x_at  | sulfotransferase family, cytosolic, 1A, phenol-preferring, member 3 /// GIY-YIG    | <i>GIYD1 /// GIYD2</i>       | 445329 /// 5 |
| 231771_at    | gap junction protein, beta 6                                                       | <i>GJB6</i>                  | 10804        |
| 207387_s_at  | glycerol kinase                                                                    | <i>GK</i>                    | 2710         |
| 214681_at    | glycerol kinase                                                                    | <i>GK</i>                    | 2710         |
| 215977_x_at  | glycerol kinase                                                                    | <i>GK</i>                    | 2710         |
| 217167_x_at  | glycerol kinase                                                                    | <i>GK</i>                    | 2710         |
| 216316_x_at  | glycerol kinase /// glycerol kinase 3 pseudogene                                   | <i>GK /// GK3P</i>           | 2710 /// 271 |
| 215966_x_at  | glycerol kinase 3 pseudogene                                                       | <i>GK3P</i>                  | 2713         |
| 238121_at    | glycerol kinase 5 (putative)                                                       | <i>GK5</i>                   | 256356       |
| 234192_s_at  | G kinase anchoring protein 1                                                       | <i>GKAP1</i>                 | 80318        |
| 214430_at    | galactosidase, alpha                                                               | <i>GLA</i>                   | 2717         |
| 206540_at    | galactosidase, beta 1-like                                                         | <i>GLB1L</i>                 | 79411        |
| 225700_at    | glucocorticoid induced transcript 1                                                | <i>GLCCI1</i>                | 113263       |
| 227525_at    | glucocorticoid induced transcript 1                                                | <i>GLCCI1</i>                | 113263       |
| 225706_at    | glucocorticoid induced transcript 1                                                | <i>GLCCI1</i>                | 113263       |
| 1560316_s_at | glucocorticoid induced transcript 1                                                | <i>GLCCI1</i>                | 113263       |
| 212045_at    | golgi apparatus protein 1                                                          | <i>GLG1</i>                  | 2734         |
| 214730_s_at  | golgi apparatus protein 1                                                          | <i>GLG1</i>                  | 2734         |
| 207966_s_at  | golgi apparatus protein 1                                                          | <i>GLG1</i>                  | 2734         |
| 227376_at    | GLI-Kruppel family member GLI3 (Greig cephalopolysyndactyly syndrome)              | <i>GLI3</i>                  | 2737         |
| 226136_at    | GLI pathogenesis-related 1 (glioma)                                                | <i>GLIPR1</i>                | 11010        |
| 214085_x_at  | GLI pathogenesis-related 1 (glioma)                                                | <i>GLIPR1</i>                | 11010        |
| 226142_at    | GLI pathogenesis-related 1 (glioma)                                                | <i>GLIPR1</i>                | 11010        |
| 204222_s_at  | GLI pathogenesis-related 1 (glioma)                                                | <i>GLIPR1</i>                | 11010        |
| 204221_x_at  | GLI pathogenesis-related 1 (glioma)                                                | <i>GLIPR1</i>                | 11010        |
| 238296_at    | GLI pathogenesis-related 1 like 1                                                  | <i>GLIPR1L1</i>              | 256710       |
| 236924_at    | glomulin, FKBP associated protein                                                  | <i>GLMN</i>                  | 11146        |
| 237388_at    | glomulin, FKBP associated protein                                                  | <i>GLMN</i>                  | 11146        |
| 244680_at    | glycine receptor, beta                                                             | <i>GLRB</i>                  | 2743         |
| 205280_at    | glycine receptor, beta                                                             | <i>GLRB</i>                  | 2743         |
| 205279_s_at  | glycine receptor, beta                                                             | <i>GLRB</i>                  | 2743         |
| 219933_at    | glutaredoxin 2                                                                     | <i>GLRX2</i>                 | 51022        |
| 214205_x_at  | glutaredoxin 3                                                                     | <i>GLRX3</i>                 | 10539        |
| 221932_s_at  | glutaredoxin 5                                                                     | <i>GLRX5</i>                 | 51218        |
| 221510_s_at  | glutaminase                                                                        | <i>GLS</i>                   | 2744         |
| 223079_s_at  | glutaminase                                                                        | <i>GLS</i>                   | 2744         |
| 203159_at    | glutaminase                                                                        | <i>GLS</i>                   | 2744         |
| 229770_at    | glycosyltransferase 1 domain containing 1                                          | <i>GLT1D1</i>                | 144423       |
| 218473_s_at  | glycosyltransferase 25 domain containing 1                                         | <i>GLT25D1</i>               | 79709        |
| 209883_at    | glycosyltransferase 25 domain containing 2                                         | <i>GLT25D2</i>               | 23127        |
| 232021_at    | glycosyltransferase 8 domain containing 3                                          | <i>GLT8D3</i>                | 283464       |
| 226868_at    | glycosyltransferase 8 domain containing 3                                          | <i>GLT8D3</i>                | 283464       |
| 226177_at    | glycolipid transfer protein                                                        | <i>GLTP</i>                  | 51228        |
| 200946_x_at  | glutamate dehydrogenase 1                                                          | <i>GLUD1</i>                 | 2746         |

|              |                                                                                      |                               |              |
|--------------|--------------------------------------------------------------------------------------|-------------------------------|--------------|
| 215794_x_at  | glutamate dehydrogenase 2                                                            | <i>GLUD2</i>                  | 2747         |
| 215001_s_at  | glutamate-ammonia ligase (glutamine synthetase)                                      | <i>GLUL</i>                   | 2752         |
| 217202_s_at  | glutamate-ammonia ligase (glutamine synthetase)                                      | <i>GLUL</i>                   | 2752         |
| 200648_s_at  | glutamate-ammonia ligase (glutamine synthetase)                                      | <i>GLUL</i>                   | 2752         |
| 231683_at    | glycine-N-acyltransferase                                                            | <i>GLYAT</i>                  | 10249        |
| 238518_x_at  | glycerate kinase                                                                     | <i>GLYCK</i>                  | 132158       |
| 222251_s_at  | glucocorticoid modulatory element binding protein 2                                  | <i>GMEB2</i>                  | 26205        |
| 218350_s_at  | geminin, DNA replication inhibitor                                                   | <i>GMNN</i>                   | 51053        |
| 219920_s_at  | GDP-mannose pyrophosphorylase B                                                      | <i>GMPPB</i>                  | 29925 /// 38 |
| 217990_at    | guanosine monophosphate reductase 2                                                  | <i>GMPR2</i>                  | 51292        |
| 206917_at    | guanine nucleotide binding protein (G protein), alpha 13                             | <i>GNA13</i>                  | 10672        |
| 224761_at    | guanine nucleotide binding protein (G protein), alpha 13                             | <i>GNA13</i>                  | 10672        |
| 205349_at    | guanine nucleotide binding protein (G protein), alpha 15 (Gq class)                  | <i>GNA15</i>                  | 2769         |
| 227692_at    | guanine nucleotide binding protein (G protein), alpha inhibiting activity polypep    | <i>GNAI1</i>                  | 2770         |
| 209576_at    | guanine nucleotide binding protein (G protein), alpha inhibiting activity polypep    | <i>GNAI1</i>                  | 2770         |
| 201179_s_at  | guanine nucleotide binding protein (G protein), alpha inhibiting activity polypep    | <i>GNAI3</i>                  | 2773         |
| 206355_at    | guanine nucleotide binding protein (G protein), alpha activating activity polypep    | <i>GNAL</i>                   | 2774         |
| 224863_at    | Guanine nucleotide binding protein (G protein), q polypeptide                        | <i>GNAQ</i>                   | 2776         |
| 224861_at    | Guanine nucleotide binding protein (G protein), q polypeptide                        | <i>GNAQ</i>                   | 2776         |
| 224862_at    | Guanine nucleotide binding protein (G protein), q polypeptide                        | <i>GNAQ</i>                   | 2776         |
| 214157_at    | GNAS complex locus                                                                   | <i>GNAS</i>                   | 2778         |
| 211858_x_at  | GNAS complex locus                                                                   | <i>GNAS</i>                   | 2778         |
| 200780_x_at  | GNAS complex locus                                                                   | <i>GNAS</i>                   | 2778         |
| 212273_x_at  | GNAS complex locus                                                                   | <i>GNAS</i>                   | 2778         |
| 200981_x_at  | GNAS complex locus                                                                   | <i>GNAS</i>                   | 2778         |
| 214548_x_at  | GNAS complex locus                                                                   | <i>GNAS</i>                   | 2778         |
| 200745_s_at  | guanine nucleotide binding protein (G protein), beta polypeptide 1                   | <i>GNB1</i>                   | 2782         |
| 200744_s_at  | guanine nucleotide binding protein (G protein), beta polypeptide 1                   | <i>GNB1</i>                   | 2782         |
| 200852_x_at  | guanine nucleotide binding protein (G protein), beta polypeptide 2                   | <i>GNB2</i>                   | 2783         |
| 225710_at    | guanine nucleotide binding protein (G protein), beta polypeptide 4                   | <i>GNB4</i>                   | 59345        |
| 223487_x_at  | guanine nucleotide binding protein (G protein), beta polypeptide 4                   | <i>GNB4</i>                   | 59345        |
| 224964_s_at  | guanine nucleotide binding protein (G protein), gamma 2                              | <i>GNG2</i>                   | 54331        |
| 207157_s_at  | guanine nucleotide binding protein (G protein), gamma 5                              | <i>GNG5</i>                   | 2787         |
| 228831_s_at  | guanine nucleotide binding protein (G protein), gamma 7                              | <i>GNG7</i>                   | 2788         |
| 233544_at    | Guanine nucleotide binding protein-like 1                                            | <i>GNL1</i>                   | 2794         |
| 37145_at     | granulysin                                                                           | <i>GNLY</i>                   | 10578        |
| 205495_s_at  | granulysin                                                                           | <i>GNLY</i>                   | 10578        |
| 202382_s_at  | glucosamine-6-phosphate deaminase 1                                                  | <i>GNPDA1</i>                 | 10007        |
| 227022_at    | glucosamine-6-phosphate deaminase 2                                                  | <i>GNPDA2</i>                 | 132789       |
| 225853_at    | glucosamine-phosphate N-acyltransferase 1                                            | <i>GNPNAT1</i>                | 64841        |
| 212959_s_at  | N-acetylglucosamine-1-phosphate transferase, alpha and beta subunits                 | <i>GNPTAB</i>                 | 79158        |
| 224887_at    | N-acetylglucosamine-1-phosphate transferase, gamma subunit                           | <i>GNPTG</i>                  | 84572        |
| 211522_s_at  | gonadotropin-releasing hormone receptor                                              | <i>GNRHR</i>                  | 2798         |
| 211523_at    | gonadotropin-releasing hormone receptor                                              | <i>GNRHR</i>                  | 2798         |
| 212334_at    | glucosamine (N-acetyl)-6-sulfatase (Sanfilippo disease IIID)                         | <i>GNS</i>                    | 2799         |
| 203676_at    | glucosamine (N-acetyl)-6-sulfatase (Sanfilippo disease IIID)                         | <i>GNS</i>                    | 2799         |
| 212335_at    | glucosamine (N-acetyl)-6-sulfatase (Sanfilippo disease IIID)                         | <i>GNS</i>                    | 2799         |
| 207575_at    | golgin-like protein /// golgi autoantigen, golgin subfamily a, 6 /// similar to Golg | <i>GOLGA</i> /// <i>GOLGA</i> | 342096       |
| 203383_s_at  | golgi autoantigen, golgin subfamily a, 1                                             | <i>GOLGA1</i>                 | 2800         |
| 203384_s_at  | golgi autoantigen, golgin subfamily a, 1                                             | <i>GOLGA1</i>                 | 2800         |
| 35436_at     | golgi autoantigen, golgin subfamily a, 2                                             | <i>GOLGA2</i>                 | 2801         |
| 204384_at    | golgi autoantigen, golgin subfamily a, 2                                             | <i>GOLGA2</i>                 | 2801         |
| 211059_s_at  | golgi autoantigen, golgin subfamily a, 2                                             | <i>GOLGA2</i>                 | 2801         |
| 201567_s_at  | golgi autoantigen, golgin subfamily a, 4                                             | <i>GOLGA4</i>                 | 2803         |
| 218241_at    | golgi autoantigen, golgin subfamily a, 5                                             | <i>GOLGA5</i>                 | 9950         |
| 1554167_a_at | golgi autoantigen, golgin subfamily a, 7                                             | <i>GOLGA7</i>                 | 51125        |
| 217819_at    | golgi autoantigen, golgin subfamily a, 7                                             | <i>GOLGA7</i>                 | 51125        |
| 210425_x_at  | golgi autoantigen, golgin subfamily a, 8B                                            | <i>GOLGA8B</i>                | 23015 /// 44 |
| 201057_s_at  | golgin B1, golgi integral membrane protein                                           | <i>GOLGB1</i>                 | 2804         |
| 238002_at    | golgi integral membrane protein 4                                                    | <i>GOLIM4</i>                 | ---          |
| 218692_at    | Golgi-localized protein                                                              | <i>GOLSYN</i>                 | 55638        |
| 236862_at    | Golgi associated PDZ and coiled-coil motif containing                                | <i>GOPC</i>                   | 57120        |
| 227214_at    | golgi associated PDZ and coiled-coil motif containing                                | <i>GOPC</i>                   | 57120        |

|              |                                                                                |                         |              |
|--------------|--------------------------------------------------------------------------------|-------------------------|--------------|
| 225022_at    | golgi associated PDZ and coiled-coil motif containing                          | <i>GOPC</i>             | 57120        |
| 227215_at    | golgi associated PDZ and coiled-coil motif containing                          | <i>GOPC</i>             | 57120        |
| 215749_s_at  | golgi reassembly stacking protein 1, 65kDa                                     | <i>GORASP1</i>          | 64689        |
| 207812_s_at  | golgi reassembly stacking protein 2, 55kDa                                     | <i>GORASP2</i>          | 26003        |
| 208843_s_at  | golgi reassembly stacking protein 2, 55kDa                                     | <i>GORASP2</i>          | 26003        |
| 213180_s_at  | golgi SNAP receptor complex member 2                                           | <i>GOSR2</i>            | 9570         |
| 211060_x_at  | glycosylphosphatidylinositol anchor attachment protein 1 homolog (yeast)       | <i>GPAA1</i>            | 8733         |
| 219818_s_at  | G patch domain containing 1                                                    | <i>GPATCH1</i>          | 55094        |
| 242224_at    | G patch domain containing 2                                                    | <i>GPATCH2</i>          | 55105        |
| 236026_at    | G patch domain containing 2                                                    | <i>GPATCH2</i>          | 55105        |
| 1556126_s_at | G patch domain containing 2                                                    | <i>GPATCH2</i>          | 55105        |
| 239768_x_at  | G patch domain containing 2                                                    | <i>GPATCH2</i>          | ---          |
| 220596_at    | G patch domain containing 4                                                    | <i>GPATCH4</i>          | 54865        |
| 223705_s_at  | GC-rich promoter binding protein 1                                             | <i>GPBP1</i>            | 65056        |
| 217877_s_at  | GC-rich promoter binding protein 1-like 1                                      | <i>GPBP1L1</i>          | 60313        |
| 1569320_at   | GC-rich promoter binding protein 1-like 1                                      | <i>GPBP1L1</i>          | 60313        |
| 222452_s_at  | GC-rich promoter binding protein 1-like 1                                      | <i>GPBP1L1</i>          | 60313        |
| 243243_at    | Glypican 3                                                                     | <i>GPC3</i>             | 2719         |
| 207174_at    | glypican 5                                                                     | <i>GPC5</i>             | 2262         |
| 210007_s_at  | glycerol-3-phosphate dehydrogenase 2 (mitochondrial)                           | <i>GPD2</i>             | 2820         |
| 225447_at    | glycerol-3-phosphate dehydrogenase 2 (mitochondrial)                           | <i>GPD2</i>             | 2820         |
| 208308_s_at  | glucose phosphate isomerase                                                    | <i>GPI</i>              | 100133951,   |
| 209469_at    | glycoprotein M6A                                                               | <i>GPM6A</i>            | 2823         |
| 209470_s_at  | glycoprotein M6A                                                               | <i>GPM6A</i>            | 2823         |
| 201141_at    | glycoprotein (transmembrane) nmb                                               | <i>GNMB</i>             | 10457        |
| 225058_at    | G protein-coupled receptor 108                                                 | <i>GPR108</i>           | 56927        |
| 205220_at    | G protein-coupled receptor 109B                                                | <i>GPR109B</i>          | 8843         |
| 1555447_at   | G protein-coupled receptor 114                                                 | <i>GPR114</i>           | 221188       |
| 229971_at    | G protein-coupled receptor 114                                                 | <i>GPR114</i>           | 221188       |
| 1555122_at   | G protein-coupled receptor 125                                                 | <i>GPR125</i>           | 166647       |
| 233887_at    | G protein-coupled receptor 126                                                 | <i>GPR126</i>           | 57211        |
| 213094_at    | G protein-coupled receptor 126                                                 | <i>GPR126</i>           | 57211        |
| 242592_at    | G protein-coupled receptor 137C                                                | <i>GPR137C</i>          | 283554       |
| 228770_at    | G protein-coupled receptor 146                                                 | <i>GPR146</i>           | 115330       |
| 231166_at    | G protein-coupled receptor 155                                                 | <i>GPR155</i>           | 151556       |
| 239533_at    | G protein-coupled receptor 155                                                 | <i>GPR155</i>           | 151556       |
| 207651_at    | G protein-coupled receptor 171                                                 | <i>GPR171</i>           | 29909        |
| 218151_x_at  | G protein-coupled receptor 172A                                                | <i>GPR172A</i>          | 79581        |
| 218855_at    | G protein-coupled receptor 175                                                 | <i>GPR175</i>           | 131601       |
| 221958_s_at  | G protein-coupled receptor 177                                                 | <i>GPR177</i>           | 79971        |
| 228949_at    | G protein-coupled receptor 177                                                 | <i>GPR177</i>           | 79971        |
| 210279_at    | G protein-coupled receptor 18                                                  | <i>GPR18</i>            | 2841         |
| 207183_at    | G protein-coupled receptor 19                                                  | <i>GPR19</i>            | 2842         |
| 244493_at    | G protein-coupled receptor 22                                                  | <i>GPR22</i>            | 2845         |
| 223620_at    | G protein-coupled receptor 34                                                  | <i>GPR34</i>            | 2857         |
| 210264_at    | G protein-coupled receptor 35                                                  | <i>GPR35</i>            | 2859         |
| 209631_s_at  | G protein-coupled receptor 37 (endothelin receptor type B-like)                | <i>GPR37</i>            | 2861         |
| 206361_at    | G protein-coupled receptor 44                                                  | <i>GPR44</i>            | 11251        |
| 212070_at    | G protein-coupled receptor 56                                                  | <i>GPR56</i>            | 9289         |
| 1553316_at   | G protein-coupled receptor 82                                                  | <i>GPR82</i>            | 27197        |
| 1553317_s_at | G protein-coupled receptor 82                                                  | <i>GPR82</i>            | 27197        |
| 223767_at    | G protein-coupled receptor 84                                                  | <i>GPR84</i>            | 53831        |
| 219898_at    | G protein-coupled receptor 85                                                  | <i>GPR85</i>            | 54329        |
| 225463_x_at  | G protein-coupled receptor 89A                                                 | <i>GPR89A</i>           | 51463 /// 65 |
| 220642_x_at  | G protein-coupled receptor 89B /// G protein-coupled receptor 89A /// G protei | <i>GPR89A /// GPR89</i> | 51463 /// 65 |
| 223531_x_at  | G protein-coupled receptor 89B /// G protein-coupled receptor 89A /// G protei | <i>GPR89A /// GPR89</i> | 51463 /// 65 |
| 1553723_at   | G protein-coupled receptor 97                                                  | <i>GPR97</i>            | 222487       |
| 220404_at    | G protein-coupled receptor 97                                                  | <i>GPR97</i>            | 222487       |
| 206747_at    | G protein regulated inducer of neurite outgrowth 2                             | <i>GPRIN2</i>           | 9721         |
| 209350_s_at  | G protein pathway suppressor 2                                                 | <i>GPS2</i>             | 27065 /// 28 |
| 221922_at    | G-protein signaling modulator 2 (AGS3-like, C. elegans)                        | <i>GPSM2</i>            | 29899        |
| 205240_at    | G-protein signaling modulator 2 (AGS3-like, C. elegans)                        | <i>GPSM2</i>            | 29899        |
| 204265_s_at  | G-protein signaling modulator 3 (AGS3-like, C. elegans)                        | <i>GPSM3</i>            | 63940        |

|              |                                                                                       |                          |           |
|--------------|---------------------------------------------------------------------------------------|--------------------------|-----------|
| 1569392_at   | glycoprotein, synaptic 2                                                              | <i>GPSN2</i>             | 9524      |
| 214091_s_at  | glutathione peroxidase 3 (plasma)                                                     | <i>GPX3</i>              | 2878      |
| 201348_at    | glutathione peroxidase 3 (plasma)                                                     | <i>GPX3</i>              | 2878      |
| 201106_at    | glutathione peroxidase 4 (phospholipid hydroperoxidase)                               | <i>GPX4</i>              | 2879      |
| 224807_at    | GRAM domain containing 1A                                                             | <i>GRAMD1A</i>           | 57655     |
| 244808_at    | GRAM domain containing 1A                                                             | <i>GRAMD1A</i>           | 57655     |
| 219313_at    | GRAM domain containing 1C                                                             | <i>GRAMD1C</i>           | 54762     |
| 238049_at    | GRAM domain containing 3                                                              | <i>GRAMD3</i>            | 65983     |
| 228263_at    | GRP1 (general receptor for phosphoinositides 1)-associated scaffold protein           | <i>GRASP</i>             | 160622    |
| 209409_at    | growth factor receptor-bound protein 10                                               | <i>GRB10</i>             | 2887      |
| 223049_at    | growth factor receptor-bound protein 2                                                | <i>GRB2</i>              | 2885      |
| 215075_s_at  | growth factor receptor-bound protein 2                                                | <i>GRB2</i>              | 2885      |
| 218468_s_at  | gremlin 1, cysteine knot superfamily, homolog (Xenopus laevis)                        | <i>GREM1</i>             | 26585     |
| 236538_at    | glutamate receptor, ionotropic, AMPA 2                                                | <i>GRIA2</i>             | 2891      |
| 241172_at    | glutamate receptor, ionotropic, AMPA 2                                                | <i>GRIA2</i>             | 2891      |
| 205358_at    | glutamate receptor, ionotropic, AMPA 2                                                | <i>GRIA2</i>             | 2891      |
| 1560142_at   | glutamate receptor, ionotropic, kainate 2                                             | <i>GRIK2</i>             | 2898      |
| 212090_at    | glutamate receptor, ionotropic, N-methyl D-aspartate-associated protein 1 (glutamate) | <i>GRINA</i>             | 2907      |
| 204396_s_at  | G protein-coupled receptor kinase 5                                                   | <i>GRK5</i>              | 2869      |
| 202848_s_at  | G protein-coupled receptor kinase 6                                                   | <i>GRK6</i>              | 2870      |
| 211543_s_at  | G protein-coupled receptor kinase 6                                                   | <i>GRK6</i>              | 2870      |
| 229394_s_at  | glucocorticoid receptor DNA binding factor 1                                          | <i>GRLF1</i>             | 2909      |
| 214217_at    | Glutamate receptor, metabotropic 5                                                    | <i>GRM5</i>              | 2915      |
| 208035_at    | glutamate receptor, metabotropic 6                                                    | <i>GRM6</i>              | 2916      |
| 200678_x_at  | granulin                                                                              | <i>GRN</i>               | 2896      |
| 216041_x_at  | granulin                                                                              | <i>GRN</i>               | 2896      |
| 211284_s_at  | granulin                                                                              | <i>GRN</i>               | 2896      |
| 212432_at    | GrpE-like 1, mitochondrial (E. coli)                                                  | <i>GRPEL1</i>            | 80273     |
| 226881_at    | GrpE-like 2, mitochondrial (E. coli)                                                  | <i>GRPEL2</i>            | 134266    |
| 221917_s_at  | G-rich RNA sequence binding factor 1                                                  | <i>GRSF1</i>             | 2926      |
| 201501_s_at  | G-rich RNA sequence binding factor 1                                                  | <i>GRSF1</i>             | 2926      |
| 201520_s_at  | G-rich RNA sequence binding factor 1                                                  | <i>GRSF1</i>             | 2926      |
| 215659_at    | Gasdermin-like                                                                        | <i>GSDML</i>             | 55876     |
| 240452_at    | G1 to S phase transition 1                                                            | <i>GSPT1</i>             | 2935      |
| 211630_s_at  | glutathione synthetase                                                                | <i>GSS</i>               | 2937      |
| 215766_at    | Glutathione S-transferase A1                                                          | <i>GSTA1</i>             | 2938      |
| 202967_at    | glutathione S-transferase A4                                                          | <i>GSTA4</i>             | 2941      |
| 220063_at    | glutathione S-transferase, C-terminal domain containing                               | <i>GSTCD</i>             | 79807     |
| 1554518_at   | glutathione S-transferase, C-terminal domain containing                               | <i>GSTCD</i>             | 79807     |
| 217751_at    | glutathione S-transferase kappa 1                                                     | <i>GSTK1</i>             | 373156    |
| 204550_x_at  | glutathione S-transferase M1                                                          | <i>GSTM1</i>             | 2944      |
| 215333_x_at  | glutathione S-transferase M1                                                          | <i>GSTM1</i>             | 2944      |
| 204418_x_at  | glutathione S-transferase M2 (muscle)                                                 | <i>GSTM2</i>             | 2946      |
| 235867_at    | glutathione S-transferase M3 (brain)                                                  | <i>GSTM3</i>             | 2947      |
| 210912_x_at  | glutathione S-transferase M4                                                          | <i>GSTM4</i>             | 2948      |
| 201470_at    | glutathione S-transferase omega 1                                                     | <i>GSTO1</i>             | 9446      |
| 1557915_s_at | glutathione S-transferase omega 1                                                     | <i>GSTO1</i>             | 9446      |
| 220853_at    | glycosyltransferase-like domain containing 1                                          | <i>GTDC1</i>             | 79712     |
| 225433_at    | General transcription factor IIA, 1, 19/37kDa                                         | <i>GTF2A1</i>            | 2957      |
| 202678_at    | general transcription factor IIA, 2, 12kDa                                            | <i>GTF2A2</i>            | 2958      |
| 202453_s_at  | general transcription factor IIH, polypeptide 1, 62kDa                                | <i>GTF2H1</i>            | 2965      |
| 223758_s_at  | general transcription factor IIH, polypeptide 2, 44kDa                                | <i>GTF2H2</i>            | 2966      |
| 222104_x_at  | general transcription factor IIH, polypeptide 3, 34kDa                                | <i>GTF2H3</i>            | 2967      |
| 210891_s_at  | general transcription factor II, i /// general transcription factor II, i, pseudogene | <i>GTF2I /// GTF2IP1</i> | 100093631 |
| 212429_s_at  | general transcription factor IIIC, polypeptide 2, beta 110kDa                         | <i>GTF3C2</i>            | 2976      |
| 204366_s_at  | general transcription factor IIIC, polypeptide 2, beta 110kDa                         | <i>GTF3C2</i>            | 2976      |
| 218343_s_at  | general transcription factor IIIC, polypeptide 3, 102kDa                              | <i>GTF3C3</i>            | 9330      |
| 219357_at    | GTP binding protein 1                                                                 | <i>GTPBP1</i>            | 9567      |
| 226359_at    | GTP binding protein 1                                                                 | <i>GTPBP1</i>            | 9567      |
| 239773_at    | GTP-binding protein 10 (putative)                                                     | <i>GTPBP10</i>           | 85865     |
| 223789_s_at  | GTP binding protein 2                                                                 | <i>GTPBP2</i>            | 54676     |
| 213835_x_at  | GTP binding protein 3 (mitochondrial)                                                 | <i>GTPBP3</i>            | 84705     |
| 228002_at    | GTP binding protein 4 /// isopenentenyl-diphosphate delta isomerase 2                 | <i>GTPBP4 /// IDI2</i>   | 91734     |

|              |                                                                               |                               |              |
|--------------|-------------------------------------------------------------------------------|-------------------------------|--------------|
| 242685_at    | GTP-binding protein 8 (putative)                                              | <i>GTPBP8</i>                 | 29083        |
| 211040_x_at  | G-2 and S-phase expressed 1                                                   | <i>GTSE1</i>                  | 51512        |
| 200075_s_at  | guanylate kinase 1                                                            | <i>GUK1</i>                   | 2987         |
| 204237_at    | GULP, engulfment adaptor PTB domain containing 1                              | <i>GULP1</i>                  | 51454        |
| 204235_s_at  | GULP, engulfment adaptor PTB domain containing 1                              | <i>GULP1</i>                  | 51454        |
| 232207_at    | glucuronidase, beta-like 2                                                    | <i>GUSBL2</i>                 | 375513       |
| 232889_at    | glucuronidase, beta pseudogene 1                                              | <i>GUSBP1</i>                 | ---          |
| 213089_at    | glucuronidase, beta pseudogene 1                                              | <i>GUSBP1</i>                 | 100132134,   |
| 220577_at    | GTPase, very large interferon inducible 1                                     | <i>GVIN1</i>                  | 387751       |
| 201554_x_at  | glycogenin 1                                                                  | <i>GYG1</i>                   | 2992         |
| 211275_s_at  | glycogenin 1                                                                  | <i>GYG1</i>                   | 2992         |
| 1559520_at   | Glycophorin A (MNS blood group)                                               | <i>GYP A</i>                  | 2993         |
| 202947_s_at  | glycophorin C (Gerbich blood group)                                           | <i>GYPC</i>                   | 2995         |
| 201673_s_at  | glycogen synthase 1 (muscle)                                                  | <i>GYS1</i>                   | 2997         |
| 225884_s_at  | GDNF-inducible zinc finger protein 1                                          | <i>GZF1</i>                   | 64412        |
| 234055_s_at  | GDNF-inducible zinc finger protein 1                                          | <i>GZF1</i>                   | 64412        |
| 205488_at    | granzyme A (granzyme 1, cytotoxic T-lymphocyte-associated serine esterase 3)  | <i>GZMA</i>                   | 3001         |
| 210164_at    | granzyme B (granzyme 2, cytotoxic T-lymphocyte-associated serine esterase 1)  | <i>GZMB</i>                   | 3002         |
| 206666_at    | granzyme K (granzyme 3; tryptase II)                                          | <i>GZMK</i>                   | 3003         |
| 225245_x_at  | H2A histone family, member J                                                  | <i>H2AFJ</i>                  | 55766        |
| 227085_at    | H2A histone family, member V                                                  | <i>H2AFV</i>                  | 94239        |
| 212205_at    | H2A histone family, member V                                                  | <i>H2AFV</i>                  | 94239        |
| 212206_s_at  | H2A histone family, member V                                                  | <i>H2AFV</i>                  | 94239        |
| 205436_s_at  | H2A histone family, member X                                                  | <i>H2AFX</i>                  | 3014         |
| 212525_s_at  | H2A histone family, member X                                                  | <i>H2AFX</i>                  | 3014         |
| 214500_at    | H2A histone family, member Y                                                  | <i>H2AFY</i>                  | 9555         |
| 211997_x_at  | H3 histone, family 3B (H3.3B)                                                 | <i>H3F3B</i>                  | 3020 /// 30: |
| 211999_at    | H3 histone, family 3B (H3.3B)                                                 | <i>H3F3B</i>                  | 3020 /// 30: |
| 209069_s_at  | H3 histone, family 3B (H3.3B)                                                 | <i>H3F3B</i>                  | 3020 /// 30: |
| 211998_at    | H3 histone, family 3B (H3.3B)                                                 | <i>H3F3B</i>                  | 3020 /// 30: |
| 226160_at    | hexose-6-phosphate dehydrogenase (glucose 1-dehydrogenase)                    | <i>H6PD</i>                   | 9563         |
| 227471_at    | HECT domain and ankyrin repeat containing, E3 ubiquitin protein ligase 1      | <i>HACE1</i>                  | 57531        |
| 201036_s_at  | hydroxyacyl-Coenzyme A dehydrogenase                                          | <i>HADH</i>                   | 3033         |
| 206643_at    | histidine ammonia-lyase                                                       | <i>HAL</i>                    | 3034         |
| 202042_at    | histidyl-tRNA synthetase                                                      | <i>HARS</i>                   | 3035         |
| 209102_s_at  | HMG-box transcription factor 1                                                | <i>HBP1</i>                   | 26959        |
| 240602_at    | HBS1-like ( <i>S. cerevisiae</i> )                                            | <i>HBS1L</i>                  | 10767        |
| 209316_s_at  | HBS1-like ( <i>S. cerevisiae</i> )                                            | <i>HBS1L</i>                  | 10767        |
| 202300_at    | hepatitis B virus x interacting protein                                       | <i>HBXIP</i>                  | 10542        |
| 202299_s_at  | hepatitis B virus x interacting protein                                       | <i>HBXIP</i>                  | 10542        |
| 244296_at    | HCG1776047                                                                    | <i>hCG_1776047</i>            | 727961       |
| 206548_at    | hypothetical protein FLJ23556                                                 | <i>hCG_1776259</i>            | 79938        |
| 232298_at    | hCG1806964                                                                    | <i>hCG_1806964</i>            | 401093       |
| 243892_at    | hCG1814936                                                                    | <i>hCG_1814936</i>            | 646865       |
| 238021_s_at  | hCG1815491                                                                    | <i>hCG_1815491</i>            | 643911       |
| 238022_at    | hCG1815491                                                                    | <i>hCG_1815491</i>            | 643911       |
| 200886_s_at  | phosphoglycerate mutase 1 (brain) /// phosphoglycerate mutase 1 pseudogene    | <i>hCG_2015138</i> /// F 5223 |              |
| 213356_x_at  | heterogeneous nuclear ribonucleoprotein A1 /// heterogeneous nuclear ribonu   | <i>hCG_2023776</i> /// t      | 100128836,   |
| 216559_x_at  | heterogeneous nuclear ribonucleoprotein A1 /// similar to Heterogeneous nucle | <i>hCG_2023776</i> /// t      | 100128836,   |
| 232239_at    | hCG2024094                                                                    | <i>hCG_2024094</i>            | 643529       |
| 1559276_at   | potassium channel tetramerisation domain containing 1                         | <i>hCG_38480</i>              | 728606       |
| 235542_at    | hypothetical protein MGC22014                                                 | <i>hCG_40738</i>              | 200424       |
| 214754_at    | hypothetical protein MGC22014                                                 | <i>hCG_40738</i>              | 200424       |
| 225584_at    | HLA complex group 18                                                          | <i>HCG18</i>                  | 414777       |
| 1559050_at   | HLA complex group 27                                                          | <i>HCG27</i>                  | 253018       |
| 216229_x_at  | HLA complex group 2 pseudogene 7                                              | <i>HCG2P7</i>                 | 80867        |
| 202957_at    | hematopoietic cell-specific Lyn substrate 1                                   | <i>HCLS1</i>                  | 3059         |
| 206082_at    | HLA complex P5                                                                | <i>HCP5</i>                   | 10866        |
| 216176_at    | hepatocellular carcinoma-related HCRP1                                        | <i>HCRP1</i>                  | 387535       |
| 216174_at    | hepatocellular carcinoma-related HCRP1                                        | <i>HCRP1</i>                  | 387535       |
| 201209_at    | histone deacetylase 1                                                         | <i>HDAC1</i>                  | 3065         |
| 204225_at    | histone deacetylase 4                                                         | <i>HDAC4</i>                  | 9759         |
| 1554322_a_at | histone deacetylase 4                                                         | <i>HDAC4</i>                  | 9759         |

|              |                                                                                     |                          |        |
|--------------|-------------------------------------------------------------------------------------|--------------------------|--------|
| 228813_at    | histone deacetylase 4                                                               | <i>HDAC4</i>             | 9759   |
| 202455_at    | histone deacetylase 5                                                               | <i>HDAC5</i>             | 10014  |
| 1552760_at   | histone deacetylase 9                                                               | <i>HDAC9</i>             | 9734   |
| 203260_at    | HD domain containing 2                                                              | <i>HDHC2</i>             | 51020  |
| 203259_s_at  | HD domain containing 2                                                              | <i>HDHC2</i>             | 51020  |
| 216693_x_at  | hepatoma-derived growth factor, related protein 3                                   | <i>HDGFRP3</i>           | 50810  |
| 209524_at    | hepatoma-derived growth factor, related protein 3                                   | <i>HDGFRP3</i>           | 50810  |
| 209525_at    | Hepatoma-derived growth factor, related protein 3                                   | <i>HDGFRP3</i>           | 50810  |
| 209526_s_at  | hepatoma-derived growth factor, related protein 3                                   | <i>HDGFRP3</i>           | 50810  |
| 223155_at    | haloacid dehalogenase-like hydrolase domain containing 2                            | <i>HDHD2</i>             | 84064  |
| 221767_x_at  | high density lipoprotein binding protein (vigilin)                                  | <i>HDLBP</i>             | 3069   |
| 200643_at    | high density lipoprotein binding protein (vigilin)                                  | <i>HDLBP</i>             | 3069   |
| 225012_at    | high density lipoprotein binding protein (vigilin)                                  | <i>HDLBP</i>             | 3069   |
| 224129_s_at  | dpy-30-like protein                                                                 | <i>HPY-30</i>            | 84661  |
| 232414_at    | HEAT repeat containing 1                                                            | <i>HEATR1</i>            | 55127  |
| 218594_at    | HEAT repeat containing 1                                                            | <i>HEATR1</i>            | 55127  |
| 218460_at    | HEAT repeat containing 2                                                            | <i>HEATR2</i>            | 54919  |
| 226510_at    | HEAT repeat containing 5A                                                           | <i>HEATR5A</i>           | 25938  |
| 233642_s_at  | HEAT repeat containing 5B                                                           | <i>HEATR5B</i>           | 54497  |
| 65493_at     | HEAT repeat containing 6                                                            | <i>HEATR6</i>            | 63897  |
| 218450_at    | heme binding protein 1                                                              | <i>HEBP1</i>             | 50865  |
| 1557100_s_at | HECT domain containing 1                                                            | <i>HECTD1</i>            | 25831  |
| 227568_at    | HECT domain containing 2                                                            | <i>HECTD2</i>            | 143279 |
| 218632_at    | HECT domain containing 3                                                            | <i>HECTD3</i>            | 79654  |
| 232080_at    | HECT, C2 and WW domain containing E3 ubiquitin protein ligase 2                     | <i>HECW2</i>             | 57520  |
| 1554341_a_at | DNA helicase HEL308                                                                 | <i>HEL308</i>            | 113510 |
| 240703_s_at  | hect (homologous to the E6-AP (UBE3A) carboxyl terminus) domain and RCC1 (C         | <i>HERC1</i>             | 8925   |
| 217902_s_at  | hect domain and RLD 2                                                               | <i>HERC2</i>             | 8924   |
| 219863_at    | hect domain and RLD 5                                                               | <i>HERC5</i>             | 51191  |
| 219352_at    | hect domain and RLD 6                                                               | <i>HERC6</i>             | 55008  |
| 217168_s_at  | homocysteine-inducible, endoplasmic reticulum stress-inducible, ubiquitin-like c    | <i>HERPUD1</i>           | 9709   |
| 215155_at    | Hexosaminidase A (alpha polypeptide)                                                | <i>HEXA</i>              | 3073   |
| 201765_s_at  | hexosaminidase A (alpha polypeptide)                                                | <i>HEXA</i>              | 3073   |
| 201944_at    | hexosaminidase B (beta polypeptide)                                                 | <i>HEXB</i>              | 3074   |
| 1555866_a_at | hexosaminidase (glycosyl hydrolase family 20, catalytic domain) containing          | <i>HEXDC</i>             | 284004 |
| 211330_s_at  | hemochromatosis                                                                     | <i>HFE</i>               | 3077   |
| 241469_at    | HFM1, ATP-dependent DNA helicase homolog (S. cerevisiae)                            | <i>HFM1</i>              | 164045 |
| 1564285_at   | HFM1, ATP-dependent DNA helicase homolog (S. cerevisiae)                            | <i>HFM1</i>              | 164045 |
| 210755_at    | hepatocyte growth factor (hepapoietin A; scatter factor)                            | <i>HGF</i>               | 3082   |
| 209960_at    | hepatocyte growth factor (hepapoietin A; scatter factor)                            | <i>HGF</i>               | 3082   |
| 210428_s_at  | hepatocyte growth factor-regulated tyrosine kinase substrate                        | <i>HGS</i>               | 9146   |
| 204689_at    | hematopoietically expressed homeobox                                                | <i>HHEX</i>              | 3087   |
| 215933_s_at  | hematopoietically expressed homeobox                                                | <i>HHEX</i>              | 3087   |
| 223775_at    | hedgehog interacting protein                                                        | <i>HHIP</i>              | 64399  |
| 234665_x_at  | HERV-H LTR-associating 3                                                            | <i>HHLA3</i>             | 11147  |
| 225222_at    | hippocampus abundant transcript 1                                                   | <i>HIAT1</i>             | 64645  |
| 223073_at    | hippocampus abundant transcript-like 1                                              | <i>HIATL1</i>            | 84641  |
| 213374_x_at  | 3-hydroxyisobutyryl-Coenzyme A hydrolase                                            | <i>HIBCH</i>             | 26275  |
| 212964_at    | hypermethylated in cancer 2                                                         | <i>HIC2</i>              | 23119  |
| 1554452_a_at | hypoxia-inducible protein 2                                                         | <i>HIG2</i>              | 29923  |
| 218507_at    | hypoxia-inducible protein 2                                                         | <i>HIG2</i>              | 29923  |
| 200093_s_at  | histidine triad nucleotide binding protein 1                                        | <i>HINT1</i>             | 3094   |
| 207721_x_at  | histidine triad nucleotide binding protein 1                                        | <i>HINT1</i>             | 3094   |
| 228697_at    | histidine triad nucleotide binding protein 3                                        | <i>HINT3</i>             | 135114 |
| 226537_at    | histidine triad nucleotide binding protein 3                                        | <i>HINT3</i>             | 135114 |
| 226533_at    | histidine triad nucleotide binding protein 3                                        | <i>HINT3</i>             | 135114 |
| 226364_at    | Huntingtin interacting protein 1                                                    | <i>HIP1</i>              | 3092   |
| 38340_at     | huntingtin interacting protein 1 related /// similar to huntingtin interacting prot | <i>HIP1R /// LOC7280</i> | 9026   |
| 202347_s_at  | huntingtin interacting protein 2                                                    | <i>HIP2</i>              | 3093   |
| 225368_at    | Homeodomain interacting protein kinase 2                                            | <i>HIPK2</i>             | 28996  |
| 203253_s_at  | histidine acid phosphatase domain containing 1                                      | <i>HISPPD1</i>           | 23262  |
| 209398_at    | histone cluster 1, H1c                                                              | <i>HIST1H1C</i>          | 3006   |
| 215071_s_at  | histone cluster 1, H2ac                                                             | <i>HIST1H2AC</i>         | 8334   |



|             |                                                                               |                                        |
|-------------|-------------------------------------------------------------------------------|----------------------------------------|
| 214455_at   | histone cluster 1, H2bg /// histone cluster 1, H2bc                           | <i>HIST1H2BC</i> /// HIS: 8339 /// 834 |
| 209911_x_at | histone cluster 1, H2bd                                                       | <i>HIST1H2BD</i> 3017                  |
| 222067_x_at | histone cluster 1, H2bd                                                       | <i>HIST1H2BD</i> 3017                  |
| 208527_x_at | histone cluster 1, H2be                                                       | <i>HIST1H2BE</i> 8339 /// 834          |
| 210387_at   | histone cluster 1, H2bg                                                       | <i>HIST1H2BG</i> 8339                  |
| 209806_at   | histone cluster 1, H2bk                                                       | <i>HIST1H2BK</i> 85236                 |
| 214472_at   | histone cluster 1, H3d                                                        | <i>HIST1H3D</i> 8351                   |
| 214516_at   | histone cluster 1, H4b                                                        | <i>HIST1H4B</i> 121504 /// 5           |
| 205967_at   | histone cluster 1, H4c                                                        | <i>HIST1H4C</i> 121504 /// 5           |
| 218280_x_at | histone cluster 2, H2aa3 /// histone cluster 2, H2aa4                         | <i>HIST2H2AA3</i> /// HI: 723790 /// 5 |
| 214290_s_at | histone cluster 2, H2aa3 /// histone cluster 2, H2aa4                         | <i>HIST2H2AA3</i> /// HI: 723790 /// 5 |
| 202708_s_at | histone cluster 2, H2be                                                       | <i>HIST2H2BE</i> 8349                  |
| 221582_at   | histone cluster 3, H2a                                                        | <i>HIST3H2A</i> 92815                  |
| 204512_at   | human immunodeficiency virus type I enhancer binding protein 1                | <i>HIVEP1</i> 3096                     |
| 212642_s_at | human immunodeficiency virus type I enhancer binding protein 2                | <i>HIVEP2</i> 3097                     |
| 212641_at   | human immunodeficiency virus type I enhancer binding protein 2                | <i>HIVEP2</i> 3097                     |
| 202934_at   | hexokinase 2                                                                  | <i>HK2</i> 3099                        |
| 211799_x_at | major histocompatibility complex, class I, C                                  | <i>HLA-C</i> 3107                      |
| 201137_s_at | major histocompatibility complex, class II, DP beta 1                         | <i>HLA-DPB1</i> 3115                   |
| 239975_at   | major histocompatibility complex, class II, DP beta 2 (pseudogene)            | <i>HLA-DPB2</i> 3116                   |
| 213831_at   | major histocompatibility complex, class II, DQ alpha 1                        | <i>HLA-DQA1</i> 3117                   |
| 212998_x_at | major histocompatibility complex, class II, DQ beta 1                         | <i>HLA-DQB1</i> 100133484 ,            |
| 209480_at   | major histocompatibility complex, class II, DQ beta 1                         | <i>HLA-DQB1</i> 3119                   |
| 204806_x_at | major histocompatibility complex, class I, F                                  | <i>HLA-F</i> 3134                      |
| 221978_at   | major histocompatibility complex, class I, F                                  | <i>HLA-F</i> 3134                      |
| 211528_x_at | HLA-G histocompatibility antigen, class I, G                                  | <i>HLA-G</i> 3135                      |
| 211529_x_at | HLA-G histocompatibility antigen, class I, G                                  | <i>HLA-G</i> 3135                      |
| 211530_x_at | HLA-G histocompatibility antigen, class I, G                                  | <i>HLA-G</i> 3135                      |
| 202983_at   | helicase-like transcription factor                                            | <i>HLTF</i> 6596                       |
| 214438_at   | H2.0-like homeobox                                                            | <i>HLX</i> 3142                        |
| 224615_x_at | histocompatibility (minor) 13                                                 | <i>HM13</i> 81502                      |
| 1558561_at  | histocompatibility (minor) 13                                                 | <i>HM13</i> 81502                      |
| 210719_s_at | high-mobility group 20B                                                       | <i>HMG20B</i> 10362                    |
| 209113_s_at | high-mobility group 20B                                                       | <i>HMG20B</i> 10362                    |
| 212597_s_at | high-mobility group protein 2-like 1                                          | <i>HMG2L1</i> 10042                    |
| 212596_s_at | high-mobility group protein 2-like 1                                          | <i>HMG2L1</i> 10042                    |
| 206074_s_at | high mobility group AT-hook 1                                                 | <i>HMGGA1</i> 3159                     |
| 203744_at   | high-mobility group box 3                                                     | <i>HMGGB3</i> 3149                     |
| 202772_at   | 3-hydroxymethyl-3-methylglutaryl-Coenzyme A lyase (hydroxymethylglutaricaci   | <i>HMGCL</i> 3155                      |
| 233576_at   | 3-hydroxymethyl-3-methylglutaryl-Coenzyme A lyase-like 1                      | <i>HMGCLL1</i> 54511                   |
| 232305_at   | 3-hydroxymethyl-3-methylglutaryl-Coenzyme A lyase-like 1                      | <i>HMGCLL1</i> 54511                   |
| 221750_at   | 3-hydroxy-3-methylglutaryl-Coenzyme A synthase 1 (soluble)                    | <i>HMGCS1</i> 3157                     |
| 240110_at   | 3-hydroxy-3-methylglutaryl-Coenzyme A synthase 2 (mitochondrial)              | <i>HMGCS2</i> 3158                     |
| 209377_s_at | high mobility group nucleosomal binding domain 3                              | <i>HMGN3</i> 9324                      |
| 212873_at   | histocompatibility (minor) HA-1                                               | <i>HMHA1</i> 23526                     |
| 218120_s_at | heme oxygenase (decycling) 2                                                  | <i>HMOX2</i> 3163                      |
| 222396_at   | hematological and neurological expressed 1                                    | <i>HN1</i> 51155                       |
| 232271_at   | hepatocyte nuclear factor 4, gamma                                            | <i>HNF4G</i> 3174                      |
| 204112_s_at | histamine N-methyltransferase                                                 | <i>HNMT</i> 3176                       |
| 200016_x_at | heterogeneous nuclear ribonucleoprotein A1 /// similar to Heterogeneous nucle | <i>HNRNPA1</i> /// LOC6 3178           |
| 212626_x_at | heterogeneous nuclear ribonucleoprotein C (C1/C2)                             | <i>HNRNPC</i> 3183                     |
| 200014_s_at | heterogeneous nuclear ribonucleoprotein C (C1/C2)                             | <i>HNRNPC</i> 3183                     |
| 214737_x_at | heterogeneous nuclear ribonucleoprotein C (C1/C2)                             | <i>HNRNPC</i> 3183                     |
| 200751_s_at | heterogeneous nuclear ribonucleoprotein C (C1/C2)                             | <i>HNRNPC</i> 3183                     |
| 200594_x_at | heterogeneous nuclear ribonucleoprotein U (scaffold attachment factor A)      | <i>HNRNPU</i> 3192                     |
| 200593_s_at | heterogeneous nuclear ribonucleoprotein U (scaffold attachment factor A)      | <i>HNRNPU</i> 3192                     |
| 1555653_at  | heterogeneous nuclear ribonucleoprotein A3                                    | <i>HNRPA3</i> 220988                   |
| 211930_at   | heterogeneous nuclear ribonucleoprotein A3                                    | <i>HNRPA3</i> 220988                   |
| 221480_at   | heterogeneous nuclear ribonucleoprotein D (AU-rich element RNA binding prot   | <i>HNRPD</i> 3184                      |
| 213359_at   | Heterogeneous nuclear ribonucleoprotein D (AU-rich element RNA binding prot   | <i>HNRPD</i> 3184                      |
| 201993_x_at | heterogeneous nuclear ribonucleoprotein D-like                                | <i>HNRPDL</i> 9987                     |
| 209068_at   | heterogeneous nuclear ribonucleoprotein D-like                                | <i>HNRPDL</i> 9987                     |
| 201376_s_at | heterogeneous nuclear ribonucleoprotein F                                     | <i>HNRPF</i> 3185                      |

|             |                                                                                      |                          |                |
|-------------|--------------------------------------------------------------------------------------|--------------------------|----------------|
| 201132_at   | heterogeneous nuclear ribonucleoprotein H2 (H')                                      | <i>HNRPH2</i>            | 3188           |
| 207127_s_at | heterogeneous nuclear ribonucleoprotein H3 (2H9)                                     | <i>HNRPH3</i>            | 3189           |
| 210588_x_at | heterogeneous nuclear ribonucleoprotein H3 (2H9)                                     | <i>HNRPH3</i>            | 3189           |
| 210110_x_at | heterogeneous nuclear ribonucleoprotein H3 (2H9)                                     | <i>HNRPH3</i>            | 3189           |
| 200775_s_at | heterogeneous nuclear ribonucleoprotein K                                            | <i>HNRPK</i>             | 3190           |
| 225385_s_at | heterogeneous nuclear ribonucleoprotein L-like                                       | <i>HNRPLL</i>            | 92906          |
| 1554453_at  | heterogeneous nuclear ribonucleoprotein L-like                                       | <i>HNRPLL</i>            | 92906          |
| 1555843_at  | Heterogeneous nuclear ribonucleoprotein M                                            | <i>HNRPM</i>             | 4670           |
| 209675_s_at | heterogeneous nuclear ribonucleoprotein U-like 1                                     | <i>HNRPUL1</i>           | 11100          |
| 226651_at   | homer homolog 1 (Drosophila)                                                         | <i>HOMER1</i>            | 9456           |
| 204647_at   | homer homolog 3 (Drosophila)                                                         | <i>HOMER3</i>            | 9454           |
| 215489_x_at | homer homolog 3 (Drosophila)                                                         | <i>HOMER3</i>            | 9454           |
| 231868_at   | homeobox and leucine zipper encoding                                                 | <i>HOMEZ</i>             | 57594          |
| 209721_s_at | hypothetical protein LOC25900                                                        | <i>HOM-TE5-103</i>       | 25900          |
| 235114_x_at | hook homolog 3 (Drosophila)                                                          | <i>HOOK3</i>             | 84376          |
| 206848_at   | homeobox A7                                                                          | <i>HOXA7</i>             | 116228 /// 321 |
| 226461_at   | homeobox B9                                                                          | <i>HOXB9</i>             | 3219           |
| 206858_s_at | homeobox C6                                                                          | <i>HOXC6</i>             | 3221 /// 321   |
| 229400_at   | homeobox D10                                                                         | <i>HOXD10</i>            | 3236           |
| 231906_at   | Homeobox D8                                                                          | <i>HOXD8</i>             | 3234           |
| 206697_s_at | haptoglobin                                                                          | <i>HP</i>                | 3240 /// 321   |
| 208470_s_at | haptoglobin /// haptoglobin-related protein                                          | <i>HP /// HPR</i>        | 3240 /// 321   |
| 1554251_at  | heterochromatin protein 1, binding protein 3                                         | <i>HP1BP3</i>            | 50809          |
| 205462_s_at | hippocalcin-like 1                                                                   | <i>HPCAL1</i>            | 3241           |
| 212552_at   | hippocalcin-like 1                                                                   | <i>HPCAL1</i>            | 3241           |
| 203914_x_at | hydroxyprostaglandin dehydrogenase 15-(NAD)                                          | <i>HPGD</i>              | 3248           |
| 203913_s_at | hydroxyprostaglandin dehydrogenase 15-(NAD)                                          | <i>HPGD</i>              | 3248           |
| 211548_s_at | hydroxyprostaglandin dehydrogenase 15-(NAD)                                          | <i>HPGD</i>              | 3248           |
| 202854_at   | hypoxanthine phosphoribosyltransferase 1 (Lesch-Nyhan syndrome)                      | <i>HPRT1</i>             | 3251           |
| 210112_at   | Hermansky-Pudlak syndrome 1                                                          | <i>HPS1</i>              | 3257           |
| 217354_s_at | Hermansky-Pudlak syndrome 1 /// similar to Hermansky-Pudlak syndrome 1 prc           | <i>HPS1 /// LOC64675</i> | 3257           |
| 227139_s_at | Hermansky-Pudlak syndrome 3                                                          | <i>HPS3</i>              | 84343          |
| 204544_at   | Hermansky-Pudlak syndrome 5                                                          | <i>HPS5</i>              | 11234          |
| 222881_at   | heparanase                                                                           | <i>HPSE</i>              | 10855          |
| 1566917_at  | Helicobacter pylori responsive 1                                                     | <i>HPYR1</i>             | 93668          |
| 235110_at   | HRAS-like suppressor 3                                                               | <i>HRASLS3</i>           | 11145          |
| 213926_s_at | HIV-1 Rev binding protein                                                            | <i>HRB</i>               | 3267           |
| 218091_at   | HIV-1 Rev binding protein                                                            | <i>HRB</i>               | 3267           |
| 221170_at   | histamine receptor H4                                                                | <i>HRH4</i>              | 59340          |
| 221169_s_at | histamine receptor H4                                                                | <i>HRH4</i>              | 59340          |
| 219020_at   | HCLS1 binding protein 3                                                              | <i>HS1BP3</i>            | 64342          |
| 203283_s_at | heparan sulfate 2-O-sulfotransferase 1                                               | <i>HS2ST1</i>            | 9653           |
| 203284_s_at | heparan sulfate 2-O-sulfotransferase 1                                               | <i>HS2ST1</i>            | 9653           |
| 225263_at   | heparan sulfate 6-O-sulfotransferase 1                                               | <i>HS6ST1</i>            | 9394           |
| 202282_at   | hydroxysteroid (17-beta) dehydrogenase 10                                            | <i>HSD17B10</i>          | 3028           |
| 217989_at   | hydroxysteroid (17-beta) dehydrogenase 11                                            | <i>HSD17B11</i>          | 51170          |
| 201413_at   | hydroxysteroid (17-beta) dehydrogenase 4                                             | <i>HSD17B4</i>           | 3295           |
| 209657_s_at | heat shock transcription factor 2                                                    | <i>HSF2</i>              | 3298           |
| 224052_at   | heat shock transcription factor, Y-linked 1 /// heat shock transcription factor, Y l | <i>HSFY1 /// HSFY2</i>   | 159119 /// 321 |
| 200599_s_at | heat shock protein 90kDa beta (Grp94), member 1                                      | <i>HSP90B1</i>           | 7184           |
| 227650_at   | heat shock 70kDa protein 14                                                          | <i>HSPA14</i>            | 51182          |
| 200799_at   | heat shock 70kDa protein 1A                                                          | <i>HSPA1A</i>            | 3303 /// 330   |
| 200800_s_at | heat shock 70kDa protein 1A /// heat shock 70kDa protein 1B                          | <i>HSPA1A /// HSPA1B</i> | 3303 /// 330   |
| 202581_at   | heat shock 70kDa protein 1B                                                          | <i>HSPA1B</i>            | 3303 /// 330   |
| 208815_x_at | heat shock 70kDa protein 4                                                           | <i>HSPA4</i>             | 3308           |
| 211936_at   | heat shock 70kDa protein 5 (glucose-regulated protein, 78kDa)                        | <i>HSPA5</i>             | 3309           |
| 117_at      | heat shock 70kDa protein 6 (HSP70B')                                                 | <i>HSPA6</i>             | 3310           |
| 213418_at   | heat shock 70kDa protein 6 (HSP70B')                                                 | <i>HSPA6</i>             | 3310           |
| 221891_x_at | heat shock 70kDa protein 8 /// similar to heat shock protein 8                       | <i>HSPA8 /// LOC4021</i> | 3312           |
| 210338_s_at | heat shock 70kDa protein 8 /// similar to heat shock protein 8                       | <i>HSPA8 /// LOC4021</i> | 3312           |
| 224187_x_at | heat shock 70kDa protein 8 /// similar to heat shock protein 8                       | <i>HSPA8 /// LOC4021</i> | 3312           |
| 208687_x_at | heat shock 70kDa protein 8 /// similar to heat shock protein 8                       | <i>HSPA8 /// LOC4021</i> | 3312           |
| 219284_at   | HSPB (heat shock 27kDa) associated protein 1                                         | <i>HSPBAP1</i>           | 79663          |

|              |                                                                                   |                     |              |
|--------------|-----------------------------------------------------------------------------------|---------------------|--------------|
| 217774_s_at  | hypothetical protein HSPC152                                                      | <i>HSPC152</i>      | 51504        |
| 200806_s_at  | heat shock 60kDa protein 1 (chaperonin)                                           | <i>HSPD1</i>        | 3329         |
| 200807_s_at  | heat shock 60kDa protein 1 (chaperonin)                                           | <i>HSPD1</i>        | 3329         |
| 205133_s_at  | heat shock 10kDa protein 1 (chaperonin 10)                                        | <i>HSPE1</i>        | 3336         |
| 206976_s_at  | heat shock 105kDa/110kDa protein 1                                                | <i>HSPH1</i>        | 10808        |
| 214258_x_at  | HIV-1 Tat interacting protein, 60kDa                                              | <i>HTATIP</i>       | 10524        |
| 210253_at    | HIV-1 Tat interactive protein 2, 30kDa                                            | <i>HTATIP2</i>      | 10553        |
| 209448_at    | HIV-1 Tat interactive protein 2, 30kDa                                            | <i>HTATIP2</i>      | 10553        |
| 207180_s_at  | HIV-1 Tat interactive protein 2, 30kDa                                            | <i>HTATIP2</i>      | 10553        |
| 202602_s_at  | HIV-1 Tat specific factor 1                                                       | <i>HTATSF1</i>      | 27336        |
| 207404_s_at  | 5-hydroxytryptamine (serotonin) receptor 1E                                       | <i>HTR1E</i>        | 3354         |
| 207135_at    | 5-hydroxytryptamine (serotonin) receptor 2A                                       | <i>HTR2A</i>        | 3356         |
| 203089_s_at  | HtrA serine peptidase 2                                                           | <i>HTRA2</i>        | 27429        |
| 226879_at    | hydrogen voltage-gated channel 1                                                  | <i>HVCN1</i>        | 84329        |
| 200825_s_at  | hypoxia up-regulated 1                                                            | <i>HYOU1</i>        | 10525        |
| 219910_at    | Huntingtin interacting protein E                                                  | <i>HYPE</i>         | 11153        |
| 217900_at    | isoleucyl-tRNA synthetase 2, mitochondrial                                        | <i>IARS2</i>        | 55699        |
| 210547_x_at  | islet cell autoantigen 1, 69kDa                                                   | <i>ICA1</i>         | 3382         |
| 1555671_at   | islet cell autoantigen 1,69kDa-like                                               | <i>ICA1L</i>        | 130026       |
| 202638_s_at  | intercellular adhesion molecule 1 (CD54), human rhinovirus receptor               | <i>ICAM1</i>        | 3383         |
| 202637_s_at  | intercellular adhesion molecule 1 (CD54), human rhinovirus receptor               | <i>ICAM1</i>        | 3383         |
| 215485_s_at  | intercellular adhesion molecule 1 (CD54), human rhinovirus receptor               | <i>ICAM1</i>        | 3383         |
| 204949_at    | intercellular adhesion molecule 3                                                 | <i>ICAM3</i>        | 3385         |
| 204569_at    | intestinal cell (MAK-like) kinase                                                 | <i>ICK</i>          | 22858        |
| 201611_s_at  | isoprenylcysteine carboxyl methyltransferase                                      | <i>ICMT</i>         | 23463        |
| 211197_s_at  | inducible T-cell co-stimulator ligand                                             | <i>ICOSLG</i>       | 23308        |
| 201566_x_at  | inhibitor of DNA binding 2, dominant negative helix-loop-helix protein /// inhibi | <i>ID2 /// ID2B</i> | 3398         |
| 213931_at    | inhibitor of DNA binding 2, dominant negative helix-loop-helix protein /// inhibi | <i>ID2 /// ID2B</i> | 3398 /// 840 |
| 209292_at    | Inhibitor of DNA binding 4, dominant negative helix-loop-helix protein            | <i>ID4</i>          | 3400         |
| 209291_at    | inhibitor of DNA binding 4, dominant negative helix-loop-helix protein            | <i>ID4</i>          | 3400         |
| 209293_x_at  | inhibitor of DNA binding 4, dominant negative helix-loop-helix protein            | <i>ID4</i>          | 3400         |
| 226933_s_at  | Inhibitor of DNA binding 4, dominant negative helix-loop-helix protein            | <i>ID4</i>          | 3400         |
| 203328_x_at  | insulin-degrading enzyme                                                          | <i>IDE</i>          | 3416         |
| 217496_s_at  | insulin-degrading enzyme                                                          | <i>IDE</i>          | 3416         |
| 203327_at    | insulin-degrading enzyme                                                          | <i>IDE</i>          | 3416         |
| 1555037_a_at | isocitrate dehydrogenase 1 (NADP+), soluble                                       | <i>IDH1</i>         | 3417         |
| 202471_s_at  | isocitrate dehydrogenase 3 (NAD+) gamma                                           | <i>IDH3G</i>        | 3421         |
| 204615_x_at  | isopentenyl-diphosphate delta isomerase 1                                         | <i>IDI1</i>         | 3422         |
| 202438_x_at  | iduronate 2-sulfatase (Hunter syndrome)                                           | <i>IDS</i>          | 3423         |
| 202439_s_at  | iduronate 2-sulfatase (Hunter syndrome)                                           | <i>IDS</i>          | 3423         |
| 206342_x_at  | iduronate 2-sulfatase (Hunter syndrome)                                           | <i>IDS</i>          | 3423         |
| 211782_at    | iduronate 2-sulfatase (Hunter syndrome)                                           | <i>IDS</i>          | 3423         |
| 210666_at    | iduronate 2-sulfatase (Hunter syndrome)                                           | <i>IDS</i>          | 3423         |
| 201631_s_at  | immediate early response 3                                                        | <i>IER3</i>         | 8870         |
| 223071_at    | immediate early response 3 interacting protein 1                                  | <i>IER3IP1</i>      | 51124        |
| 218611_at    | immediate early response 5                                                        | <i>IER5</i>         | 51278        |
| 201422_at    | interferon, gamma-inducible protein 30                                            | <i>IFI30</i>        | 10437        |
| 209417_s_at  | interferon-induced protein 35                                                     | <i>IFI35</i>        | 3430         |
| 214453_s_at  | interferon-induced protein 44                                                     | <i>IFI44</i>        | 10561        |
| 214059_at    | Interferon-induced protein 44                                                     | <i>IFI44</i>        | 10561        |
| 204439_at    | interferon-induced protein 44-like                                                | <i>IFI44L</i>       | 10964        |
| 204415_at    | interferon, alpha-inducible protein 6                                             | <i>IFI6</i>         | 2537         |
| 203153_at    | interferon-induced protein with tetratricopeptide repeats 1                       | <i>IFIT1</i>        | 3434         |
| 226757_at    | interferon-induced protein with tetratricopeptide repeats 2                       | <i>IFIT2</i>        | 3433         |
| 217502_at    | interferon-induced protein with tetratricopeptide repeats 2                       | <i>IFIT2</i>        | 3433         |
| 229450_at    | interferon-induced protein with tetratricopeptide repeats 3                       | <i>IFIT3</i>        | 3437         |
| 204747_at    | interferon-induced protein with tetratricopeptide repeats 3                       | <i>IFIT3</i>        | 3437         |
| 203595_s_at  | interferon-induced protein with tetratricopeptide repeats 5                       | <i>IFIT5</i>        | 24138        |
| 203596_s_at  | interferon-induced protein with tetratricopeptide repeats 5                       | <i>IFIT5</i>        | 24138        |
| 208261_x_at  | interferon, alpha 10                                                              | <i>IFNA10</i>       | 3446         |
| 208448_x_at  | interferon, alpha 16                                                              | <i>IFNA16</i>       | 3449         |
| 211405_x_at  | interferon, alpha 17                                                              | <i>IFNA17</i>       | 3451         |
| 207964_x_at  | interferon, alpha 4                                                               | <i>IFNA4</i>        | 3441         |

|              |                                                                                  |                            |              |
|--------------|----------------------------------------------------------------------------------|----------------------------|--------------|
| 208259_x_at  | interferon, alpha 7                                                              | <i>IFNA7</i>               | 3444         |
| 225661_at    | interferon (alpha, beta and omega) receptor 1                                    | <i>IFNAR1</i>              | 3454         |
| 204785_x_at  | interferon (alpha, beta and omega) receptor 2                                    | <i>IFNAR2</i>              | 3455         |
| 1553574_at   | interferon epsilon 1                                                             | <i>IFNE1</i>               | 338376       |
| 202727_s_at  | interferon gamma receptor 1                                                      | <i>IFNGR1</i>              | 3459         |
| 211676_s_at  | interferon gamma receptor 1                                                      | <i>IFNGR1</i>              | 3459         |
| 242903_at    | interferon gamma receptor 1                                                      | <i>IFNGR1</i>              | 3459         |
| 201642_at    | interferon gamma receptor 2 (interferon gamma transducer 1)                      | <i>IFNGR2</i>              | 3460         |
| 202146_at    | interferon-related developmental regulator 1                                     | <i>IFRD1</i>               | 3475         |
| 202147_s_at  | interferon-related developmental regulator 1                                     | <i>IFRD1</i>               | 3475         |
| 216678_at    | intraflagellar transport 122 homolog (Chlamydomonas)                             | <i>IFT122</i>              | 55764        |
| 1564231_at   | intraflagellar transport 80 homolog (Chlamydomonas)                              | <i>IFT80</i>               | 57560        |
| 209540_at    | insulin-like growth factor 1 (somatomedin C)                                     | <i>IGF1</i>                | 3479         |
| 218847_at    | insulin-like growth factor 2 mRNA binding protein 2                              | <i>IGF2BP2</i>             | 10644        |
| 203820_s_at  | insulin-like growth factor 2 mRNA binding protein 3                              | <i>IGF2BP3</i>             | 10643        |
| 203819_s_at  | insulin-like growth factor 2 mRNA binding protein 3                              | <i>IGF2BP3</i>             | 10643        |
| 1569033_at   | insulin-like growth factor 2 mRNA binding protein 3                              | <i>IGF2BP3</i>             | 10643        |
| 201392_s_at  | insulin-like growth factor 2 receptor                                            | <i>IGF2R</i>               | 3482         |
| 201393_s_at  | insulin-like growth factor 2 receptor                                            | <i>IGF2R</i>               | 3482         |
| 203851_at    | insulin-like growth factor binding protein 6                                     | <i>IGFBP6</i>              | 3489         |
| 201163_s_at  | insulin-like growth factor binding protein 7                                     | <i>IGFBP7</i>              | 3490         |
| 211693_at    | immunoglobulin heavy constant alpha 1                                            | <i>IGHA1</i>               | 3500         |
| 212827_at    | immunoglobulin heavy constant mu                                                 | <i>IGHM</i>                | 3507         |
| 31861_at     | immunoglobulin mu binding protein 2                                              | <i>IGHMBP2</i>             | 3508         |
| 214669_x_at  | Immunoglobulin kappa constant                                                    | <i>IGKC</i>                | 3514         |
| 221651_x_at  | immunoglobulin kappa constant /// immunoglobulin kappa variable 1-5 /// immr     | <i>IGKC /// IGKV1-5 //</i> | 3514 /// 508 |
| 221671_x_at  | immunoglobulin kappa constant /// immunoglobulin kappa variable 1-5 /// immr     | <i>IGKC /// IGKV1-5 //</i> | 3514 /// 508 |
| 214677_x_at  | immunoglobulin lambda locus /// immunoglobulin lambda variable 4-3 /// imm       | <i>IGL@ /// IGLJ3 ///</i>  | 3535         |
| 215121_x_at  | immunoglobulin lambda locus /// immunoglobulin lambda variable 4-3 /// imm       | <i>IGL@ /// IGLV2-14</i>   | 28815 /// 38 |
| 1556579_s_at | immunoglobulin superfamily, member 10                                            | <i>IGSF10</i>              | 285313       |
| 207167_at    | immunoglobulin superfamily, member 2                                             | <i>IGSF2</i>               | 9398         |
| 206420_at    | immunoglobulin superfamily, member 6                                             | <i>IGSF6</i>               | 10261        |
| 225025_at    | immunoglobulin superfamily, member 8                                             | <i>IGSF8</i>               | 93185        |
| 218192_at    | inositol hexaphosphate kinase 2                                                  | <i>IHPK2</i>               | 51447        |
| 200066_at    | IK cytokine, down-regulator of HLA II                                            | <i>IK</i>                  | 3550         |
| 202491_s_at  | inhibitor of kappa light polypeptide gene enhancer in B-cells, kinase complex-as | <i>IKBKAP</i>              | 8518         |
| 227295_at    | IKK interacting protein                                                          | <i>IKIP</i>                | 121457       |
| 235202_x_at  | IKK interacting protein                                                          | <i>IKIP</i>                | 121457       |
| 236249_at    | IKK interacting protein                                                          | <i>IKIP</i>                | 121457       |
| 220704_at    | IKAROS family zinc finger 1 (Ikaros)                                             | <i>IKZF1</i>               | 10320        |
| 231929_at    | IKAROS family zinc finger 2 (Helios)                                             | <i>IKZF2</i>               | 22807        |
| 209575_at    | interleukin 10 receptor, beta                                                    | <i>IL10RB</i>              | 3588         |
| 1552584_at   | interleukin 12 receptor, beta 1                                                  | <i>IL12RB1</i>             | 3594         |
| 201888_s_at  | interleukin 13 receptor, alpha 1                                                 | <i>IL13RA1</i>             | 3597         |
| 211612_s_at  | interleukin 13 receptor, alpha 1                                                 | <i>IL13RA1</i>             | 3597         |
| 210904_s_at  | interleukin 13 receptor, alpha 1                                                 | <i>IL13RA1</i>             | 3597         |
| 205992_s_at  | interleukin 15                                                                   | <i>IL15</i>                | 3600         |
| 209828_s_at  | interleukin 16 (lymphocyte chemoattractant factor)                               | <i>IL16</i>                | 3603         |
| 222868_s_at  | interleukin 18 binding protein                                                   | <i>IL18BP</i>              | 10068        |
| 224283_x_at  | interleukin 18 binding protein                                                   | <i>IL18BP</i>              | 10068        |
| 210118_s_at  | interleukin 1, alpha                                                             | <i>IL1A</i>                | 3552         |
| 39402_at     | interleukin 1, beta                                                              | <i>IL1B</i>                | 3553         |
| 205067_at    | interleukin 1, beta                                                              | <i>IL1B</i>                | 3553         |
| 202948_at    | interleukin 1 receptor, type I                                                   | <i>IL1R1</i>               | 3554         |
| 215561_s_at  | interleukin 1 receptor, type I                                                   | <i>IL1R1</i>               | 3554         |
| 205403_at    | interleukin 1 receptor, type II                                                  | <i>IL1R2</i>               | 7850         |
| 210233_at    | interleukin 1 receptor accessory protein                                         | <i>IL1RAP</i>              | 3556         |
| 205227_at    | interleukin 1 receptor accessory protein                                         | <i>IL1RAP</i>              | 3556         |
| 234066_at    | Interleukin 1 receptor-like 1                                                    | <i>IL1RL1</i>              | 9173         |
| 207526_s_at  | interleukin 1 receptor-like 1                                                    | <i>IL1RL1</i>              | 9173         |
| 212659_s_at  | interleukin 1 receptor antagonist                                                | <i>IL1RN</i>               | 3557         |
| 212657_s_at  | interleukin 1 receptor antagonist                                                | <i>IL1RN</i>               | 3557         |
| 221271_at    | interleukin 21                                                                   | <i>IL21</i>                | 59067        |

|              |                                                                                   |                                     |              |
|--------------|-----------------------------------------------------------------------------------|-------------------------------------|--------------|
| 205291_at    | interleukin 2 receptor, beta                                                      | <i>IL2RB</i>                        | 3560         |
| 204116_at    | interleukin 2 receptor, gamma (severe combined immunodeficiency)                  | <i>IL2RG</i>                        | 3561         |
| 217489_s_at  | interleukin 6 receptor                                                            | <i>IL6R</i>                         | 3570         |
| 226218_at    | interleukin 7 receptor                                                            | <i>IL7R</i>                         | 3575         |
| 205798_at    | interleukin 7 receptor                                                            | <i>IL7R</i>                         | 3575         |
| 211506_s_at  | interleukin 8                                                                     | <i>IL8</i>                          | 3576         |
| 217227_x_at  | Interleukin 8                                                                     | <i>IL8</i>                          | 3535         |
| 221548_s_at  | integrin-linked kinase-associated serine/threonine phosphatase 2C                 | <i>ILKAP</i>                        | 80895        |
| 229025_s_at  | IMP1 inner mitochondrial membrane peptidase-like (S. cerevisiae)                  | <i>IMMP1L</i>                       | 196294       |
| 242361_at    | Inner membrane protein, mitochondrial (mitofilin)                                 | <i>IMMT</i>                         | 10989        |
| 203126_at    | inositol(myo)-1(or 4)-monophosphatase 2                                           | <i>IMPA2</i>                        | 3613         |
| 218637_at    | Impact homolog (mouse)                                                            | <i>IMPACT</i>                       | 55364        |
| 222698_s_at  | Impact homolog (mouse)                                                            | <i>IMPACT</i>                       | 55364        |
| 218516_s_at  | inositol monophosphatase domain containing 1                                      | <i>IMPAD1</i>                       | 54928        |
| 224744_at    | inositol monophosphatase domain containing 1                                      | <i>IMPAD1</i>                       | 54928        |
| 210029_at    | indoleamine-pyrrole 2,3 dioxygenase                                               | <i>INDO</i>                         | 3620         |
| 1568638_a_at | indoleamine-pyrrole 2,3 dioxygenase-like 1                                        | <i>INDOL1</i>                       | 169355       |
| 209808_x_at  | inhibitor of growth family, member 1                                              | <i>ING1</i>                         | 3621         |
| 208415_x_at  | inhibitor of growth family, member 1                                              | <i>ING1</i>                         | 3621         |
| 210350_x_at  | inhibitor of growth family, member 1                                              | <i>ING1</i>                         | 3621         |
| 205981_s_at  | inhibitor of growth family, member 2                                              | <i>ING2</i>                         | 3622         |
| 205070_at    | inhibitor of growth family, member 3                                              | <i>ING3</i>                         | 54556        |
| 228287_at    | inhibitor of growth family, member 5 /// similar to inhibitor of growth family, m | <i>ING5 /// LOC72777 727773 ///</i> | ε            |
| 202794_at    | inositol polyphosphate-1-phosphatase                                              | <i>INPP1</i>                        | 3628         |
| 205376_at    | inositol polyphosphate-4-phosphatase, type II, 105kDa                             | <i>INPP4B</i>                       | 8821         |
| 203006_at    | inositol polyphosphate-5-phosphatase, 40kDa                                       | <i>INPP5A</i>                       | 3632         |
| 1554757_a_at | inositol polyphosphate-5-phosphatase, 40kDa                                       | <i>INPP5A</i>                       | 3632         |
| 213804_at    | inositol polyphosphate-5-phosphatase, 75kDa                                       | <i>INPP5B</i>                       | 3633         |
| 203607_at    | inositol polyphosphate-5-phosphatase F                                            | <i>INPP5F</i>                       | 22876        |
| 201625_s_at  | insulin induced gene 1                                                            | <i>INSIG1</i>                       | 3638         |
| 201626_at    | insulin induced gene 1                                                            | <i>INSIG1</i>                       | 3638         |
| 201627_s_at  | insulin induced gene 1                                                            | <i>INSIG1</i>                       | 3638         |
| 209566_at    | insulin induced gene 2                                                            | <i>INSIG2</i>                       | 51141        |
| 213792_s_at  | insulin receptor                                                                  | <i>INSR</i>                         | 3643         |
| 229632_s_at  | integrator complex subunit 10                                                     | <i>INTS10</i>                       | 55174        |
| 225169_at    | integrator complex subunit 4                                                      | <i>INTS4</i>                        | 92105        |
| 235283_at    | integrator complex subunit 6                                                      | <i>INTS6</i>                        | 26512        |
| 1570173_at   | integrator complex subunit 7                                                      | <i>INTS7</i>                        | 25896        |
| 228946_at    | inturned planar cell polarity effector homolog (Drosophila)                       | <i>INTU</i>                         | 27152        |
| 239878_at    | inositol polyphosphate multikinase                                                | <i>IPMK</i>                         | 253430       |
| 234304_s_at  | importin 11                                                                       | <i>IPO11</i>                        | 51194        |
| 238488_at    | importin 11                                                                       | <i>IPO11</i>                        | 51194        |
| 200995_at    | Importin 7                                                                        | <i>IPO7</i>                         | 10527        |
| 200992_at    | importin 7                                                                        | <i>IPO7</i>                         | 10527        |
| 200994_at    | Importin 7                                                                        | <i>IPO7</i>                         | 10527        |
| 217885_at    | importin 9                                                                        | <i>IPO9</i>                         | 55705        |
| 1554740_a_at | intracisternal A particle-promoted polypeptide                                    | <i>IPP</i>                          | 3652         |
| 219843_at    | intracisternal A particle-promoted polypeptide                                    | <i>IPP</i>                          | 3652         |
| 221974_at    | Imprinted in Prader-Willi syndrome                                                | <i>IPW</i>                          | 3653         |
| 211707_s_at  | IQ motif containing B1                                                            | <i>IQCB1</i>                        | 9657         |
| 204202_at    | IQ motif containing E                                                             | <i>IQCE</i>                         | 23288        |
| 213446_s_at  | IQ motif containing GTPase activating protein 1                                   | <i>IQGAP1</i>                       | 8826         |
| 200791_s_at  | IQ motif containing GTPase activating protein 1                                   | <i>IQGAP1</i>                       | 8826         |
| 210840_s_at  | IQ motif containing GTPase activating protein 1                                   | <i>IQGAP1</i>                       | 8826         |
| 203474_at    | IQ motif containing GTPase activating protein 2                                   | <i>IQGAP2</i>                       | 10788        |
| 1568924_a_at | IQ motif and ubiquitin domain containing                                          | <i>IQUB</i>                         | 154865       |
| 224373_s_at  | IQ motif and WD repeats 1 /// unc-5 homolog B (C. elegans)                        | <i>IQWD1 /// UNC5B</i>              | 219699 /// ε |
| 224372_at    | IQ motif and WD repeats 1 /// unc-5 homolog B (C. elegans)                        | <i>IQWD1 /// UNC5B</i>              | 219699 /// ε |
| 201587_s_at  | interleukin-1 receptor-associated kinase 1                                        | <i>IRAK1</i>                        | 3654         |
| 1555784_s_at | interleukin-1 receptor-associated kinase 1                                        | <i>IRAK1</i>                        | 3654         |
| 231779_at    | interleukin-1 receptor-associated kinase 2                                        | <i>IRAK2</i>                        | 3656         |
| 1553740_a_at | interleukin-1 receptor-associated kinase 2                                        | <i>IRAK2</i>                        | 3656         |
| 220034_at    | interleukin-1 receptor-associated kinase 3                                        | <i>IRAK3</i>                        | 11213        |

|              |                                                                                  |                         |               |
|--------------|----------------------------------------------------------------------------------|-------------------------|---------------|
| 1568830_at   | Interleukin-1 receptor-associated kinase 3                                       | <i>IRAK3</i>            | 11213         |
| 214666_x_at  | iron-responsive element binding protein 2                                        | <i>IREB2</i>            | 3658          |
| 203275_at    | interferon regulatory factor 2                                                   | <i>IRF2</i>             | 3660          |
| 224571_at    | interferon regulatory factor 2 binding protein 2                                 | <i>IRF2BP2</i>          | 359948        |
| 224569_s_at  | interferon regulatory factor 2 binding protein 2                                 | <i>IRF2BP2</i>          | 359948        |
| 224572_s_at  | interferon regulatory factor 2 binding protein 2                                 | <i>IRF2BP2</i>          | 359948        |
| 224570_s_at  | interferon regulatory factor 2 binding protein 2                                 | <i>IRF2BP2</i>          | 359948        |
| 202597_at    | interferon regulatory factor 6                                                   | <i>IRF6</i>             | 3664          |
| 209184_s_at  | insulin receptor substrate 2                                                     | <i>IRS2</i>             | 8660          |
| 209185_s_at  | insulin receptor substrate 2                                                     | <i>IRS2</i>             | 8660          |
| 207403_at    | insulin receptor substrate 4                                                     | <i>IRS4</i>             | 8471          |
| 209075_s_at  | iron-sulfur cluster scaffold homolog (E. coli)                                   | <i>ISCU</i>             | 23479         |
| 205483_s_at  | ISG15 ubiquitin-like modifier                                                    | <i>ISG15</i>            | 9636          |
| 33304_at     | interferon stimulated exonuclease gene 20kDa                                     | <i>ISG20</i>            | 3669          |
| 204698_at    | interferon stimulated exonuclease gene 20kDa                                     | <i>ISG20</i>            | 3669          |
| 208114_s_at  | interferon stimulated exonuclease gene 20kDa-like 2                              | <i>ISG20L2</i>          | 81875         |
| 212766_s_at  | interferon stimulated exonuclease gene 20kDa-like 2                              | <i>ISG20L2</i>          | 81875         |
| 220788_s_at  | interferon-stimulated transcription factor 3, gamma 48kDa /// ring finger protei | <i>ISGF3G /// RNF31</i> | 10379 /// 5'  |
| 206104_at    | ISL LIM homeobox 1                                                               | <i>ISL1</i>             | 3670          |
| 218170_at    | isochorismatase domain containing 1                                              | <i>ISOC1</i>            | 51015         |
| 223831_x_at  | ISY1 splicing factor homolog (S. cerevisiae)                                     | <i>ISY1</i>             | 57461         |
| 223428_s_at  | ISY1 splicing factor homolog (S. cerevisiae)                                     | <i>ISY1</i>             | 57461         |
| 225632_s_at  | ISY1 splicing factor homolog (S. cerevisiae) /// RAB43, member RAS oncogene fa   | <i>ISY1 /// RAB43</i>   | 339122 /// 5' |
| 209744_x_at  | itchy homolog E3 ubiquitin protein ligase (mouse)                                | <i>ITCH</i>             | 83737         |
| 209743_s_at  | itchy homolog E3 ubiquitin protein ligase (mouse)                                | <i>ITCH</i>             | 83737         |
| 217094_s_at  | itchy homolog E3 ubiquitin protein ligase (mouse)                                | <i>ITCH</i>             | 83737         |
| 239101_at    | itchy homolog E3 ubiquitin protein ligase (mouse)                                | <i>ITCH</i>             | 83737         |
| 239044_at    | Integrin alpha FG-GAP repeat containing 1                                        | <i>ITFG1</i>            | 81533         |
| 221449_s_at  | integrin alpha FG-GAP repeat containing 1                                        | <i>ITFG1</i>            | 81533         |
| 213416_at    | integrin, alpha 4 (antigen CD49D, alpha 4 subunit of VLA-4 receptor)             | <i>ITGA4</i>            | 3676          |
| 205884_at    | integrin, alpha 4 (antigen CD49D, alpha 4 subunit of VLA-4 receptor)             | <i>ITGA4</i>            | 3676          |
| 205885_s_at  | integrin, alpha 4 (antigen CD49D, alpha 4 subunit of VLA-4 receptor)             | <i>ITGA4</i>            | 3676          |
| 201656_at    | integrin, alpha 6                                                                | <i>ITGA6</i>            | 3655          |
| 227297_at    | integrin, alpha 9                                                                | <i>ITGA9</i>            | 3680          |
| 213475_s_at  | integrin, alpha L (antigen CD11A (p180), lymphocyte function-associated antigen  | <i>ITGAL</i>            | 3683          |
| 1554240_a_at | integrin, alpha L (antigen CD11A (p180), lymphocyte function-associated antigen  | <i>ITGAL</i>            | 3683          |
| 205786_s_at  | integrin, alpha M (complement component 3 receptor 3 subunit)                    | <i>ITGAM</i>            | 3684          |
| 202351_at    | integrin, alpha V (vitronectin receptor, alpha polypeptide, antigen CD51)        | <i>ITGAV</i>            | 3685          |
| 203336_s_at  | integrin beta 1 binding protein 1                                                | <i>ITGB1BP1</i>         | 9270          |
| 216261_at    | integrin, beta 3 (platelet glycoprotein IIIa, antigen CD61)                      | <i>ITGB3</i>            | 3690          |
| 205176_s_at  | integrin beta 3 binding protein (beta3-endonexin)                                | <i>ITGB3BP</i>          | 23421         |
| 205718_at    | integrin, beta 7                                                                 | <i>ITGB7</i>            | 3695          |
| 205816_at    | integrin, beta 8                                                                 | <i>ITGB8</i>            | 3696          |
| 211488_s_at  | integrin, beta 8                                                                 | <i>ITGB8</i>            | 3696          |
| 1557080_s_at | integrin, beta-like 1 (with EGF-like repeat domains)                             | <i>ITGBL1</i>           | 9358          |
| 214927_at    | integrin, beta-like 1 (with EGF-like repeat domains)                             | <i>ITGBL1</i>           | 9358          |
| 242720_at    | inter-alpha (globulin) inhibitor H4 (plasma Kallikrein-sensitive glycoprotein)   | <i>ITIH4</i>            | 3700          |
| 211339_s_at  | IL2-inducible T-cell kinase                                                      | <i>ITK</i>              | 3702          |
| 216944_s_at  | inositol 1,4,5-triphosphate receptor, type 1                                     | <i>ITPR1</i>            | 3708          |
| 203710_at    | inositol 1,4,5-triphosphate receptor, type 1                                     | <i>ITPR1</i>            | 3708          |
| 211323_s_at  | inositol 1,4,5-triphosphate receptor, type 1                                     | <i>ITPR1</i>            | 3708          |
| 202660_at    | inositol 1,4,5-triphosphate receptor, type 2                                     | <i>ITPR2</i>            | 3709          |
| 244235_at    | influenza virus NS1A binding protein                                             | <i>IVNS1ABP</i>         | 10625         |
| 206245_s_at  | influenza virus NS1A binding protein                                             | <i>IVNS1ABP</i>         | 10625         |
| 201363_s_at  | influenza virus NS1A binding protein                                             | <i>IVNS1ABP</i>         | 10625         |
| 201362_at    | influenza virus NS1A binding protein                                             | <i>IVNS1ABP</i>         | 10625         |
| 209099_x_at  | jagged 1 (Alagille syndrome)                                                     | <i>JAG1</i>             | 182           |
| 216268_s_at  | jagged 1 (Alagille syndrome)                                                     | <i>JAG1</i>             | 182           |
| 1552611_a_at | Janus kinase 1 (a protein tyrosine kinase)                                       | <i>JAK1</i>             | 3716          |
| 1552610_a_at | Janus kinase 1 (a protein tyrosine kinase)                                       | <i>JAK1</i>             | 3716          |
| 201648_at    | Janus kinase 1 (a protein tyrosine kinase)                                       | <i>JAK1</i>             | 3716          |
| 205842_s_at  | Janus kinase 2 (a protein tyrosine kinase)                                       | <i>JAK2</i>             | 3717          |
| 205889_s_at  | janus kinase and microtubule interacting protein 2                               | <i>JAKMIP2</i>          | 9832          |

|              |                                                                             |         |             |
|--------------|-----------------------------------------------------------------------------|---------|-------------|
| 202040_s_at  | jumonji, AT rich interactive domain 1A                                      | JARID1A | 5927        |
| 201548_s_at  | jumonji, AT rich interactive domain 1B                                      | JARID1B | 10765       |
| 211202_s_at  | jumonji, AT rich interactive domain 1B                                      | JARID1B | 10765       |
| 201549_x_at  | jumonji, AT rich interactive domain 1B                                      | JARID1B | 10765       |
| 203298_s_at  | jumonji, AT rich interactive domain 2                                       | JARID2  | 3720        |
| 203297_s_at  | jumonji, AT rich interactive domain 2                                       | JARID2  | 3720        |
| 226267_at    | jun dimerization protein 2                                                  | JDP2    | 122953      |
| 225142_at    | jumonji C domain-containing histone demethylase 1 homolog D (S. cerevisiae) | JHDM1D  | 80853       |
| 221778_at    | jumonji C domain-containing histone demethylase 1 homolog D (S. cerevisiae) | JHDM1D  | 80853       |
| 212689_s_at  | jumonji domain containing 1A                                                | JMJD1A  | 55818       |
| 221763_at    | jumonji domain containing 1C                                                | JMJD1C  | 221037      |
| 241661_at    | jumonji domain containing 1C                                                | JMJD1C  | 221037      |
| 224933_s_at  | jumonji domain containing 1C                                                | JMJD1C  | 221037      |
| 203205_at    | jumonji domain containing 2A                                                | JMJD2A  | 9682        |
| 235789_at    | jumonji domain containing 2B                                                | JMJD2B  | 23030       |
| 212496_s_at  | jumonji domain containing 2B                                                | JMJD2B  | 23030       |
| 212495_at    | jumonji domain containing 2B                                                | JMJD2B  | 23030       |
| 212492_s_at  | jumonji domain containing 2B                                                | JMJD2B  | 23030       |
| 215616_s_at  | jumonji domain containing 2B                                                | JMJD2B  | 23030       |
| 209984_at    | jumonji domain containing 2C                                                | JMJD2C  | 23081       |
| 1556493_a_at | jumonji domain containing 2C                                                | JMJD2C  | 23081       |
| 244385_at    | Jumonji domain containing 2C                                                | JMJD2C  | 23081       |
| 214861_at    | jumonji domain containing 2C                                                | JMJD2C  | 23081       |
| 239285_at    | Jumonji domain containing 2C                                                | JMJD2C  | ---         |
| 1556067_a_at | jumonji domain containing 3                                                 | JMJD3   | 23135       |
| 213146_at    | jumonji domain containing 3                                                 | JMJD3   | 23135       |
| 41386_i_at   | jumonji domain containing 3                                                 | JMJD3   | 23135       |
| 1556066_at   | jumonji domain containing 3                                                 | JMJD3   | 23135       |
| 212722_s_at  | jumonji domain containing 6                                                 | JMJD6   | 23210       |
| 212723_at    | jumonji domain containing 6                                                 | JMJD6   | 23210       |
| 226352_at    | junction-mediating and regulatory protein                                   | JMY     | 133746      |
| 241985_at    | junction-mediating and regulatory protein                                   | JMY     | 133746      |
| 201751_at    | Josephin domain containing 1                                                | JOSD1   | 9929        |
| 222728_s_at  | Josephin domain containing 3                                                | JOSD3   | 79101       |
| 221580_s_at  | Josephin domain containing 3                                                | JOSD3   | 79101       |
| 201464_x_at  | jun oncogene                                                                | JUN     | 3725        |
| 201466_s_at  | jun oncogene                                                                | JUN     | 3725        |
| 201473_at    | jun B proto-oncogene                                                        | JUNB    | 3726        |
| 203752_s_at  | jun D proto-oncogene                                                        | JUND    | 3727        |
| 203751_x_at  | jun D proto-oncogene                                                        | JUND    | 3727        |
| 200840_at    | lysyl-tRNA synthetase                                                       | KARS    | 3735        |
| 212447_at    | kelch repeat and BTB (POZ) domain containing 2                              | KBTBD2  | 25948       |
| 223584_s_at  | kelch repeat and BTB (POZ) domain containing 2                              | KBTBD2  | 25948       |
| 223585_x_at  | kelch repeat and BTB (POZ) domain containing 2                              | KBTBD2  | 25948       |
| 228777_at    | kelch repeat and BTB (POZ) domain containing 3                              | KBTBD3  | 143879      |
| 223765_s_at  | kelch repeat and BTB (POZ) domain containing 4                              | KBTBD4  | 55709       |
| 226479_at    | kelch repeat and BTB (POZ) domain containing 6                              | KBTBD6  | 89890       |
| 223412_at    | kelch repeat and BTB (POZ) domain containing 7                              | KBTBD7  | 84078       |
| 239835_at    | kelch repeat and BTB (POZ) domain containing 8                              | KBTBD8  | 84541       |
| 222471_s_at  | potassium channel modulatory factor 1                                       | KCMF1   | 56888       |
| 242887_at    | potassium channel modulatory factor 1                                       | KCMF1   | 56888       |
| 217938_s_at  | potassium channel modulatory factor 1                                       | KCMF1   | 56888       |
| 203402_at    | potassium voltage-gated channel, shaker-related subfamily, beta member 2    | KCNAB2  | 8514        |
| 211791_s_at  | potassium voltage-gated channel, shaker-related subfamily, beta member 2    | KCNAB2  | 8514        |
| 207103_at    | potassium voltage-gated channel, Shal-related subfamily, member 2           | KCND2   | 3751        |
| 222922_at    | potassium voltage-gated channel, Isk-related family, member 3               | KCNE3   | 10008       |
| 222923_s_at  | potassium voltage-gated channel, Isk-related family, member 3               | KCNE3   | 10008       |
| 224099_at    | potassium voltage-gated channel, subfamily H (eag-related), member 7        | KCNH7   | 90134       |
| 238428_at    | potassium inwardly-rectifying channel, subfamily J, member 15               | KCNJ15  | 100131955 , |
| 211806_s_at  | potassium inwardly-rectifying channel, subfamily J, member 15               | KCNJ15  | 3772        |
| 210119_at    | potassium inwardly-rectifying channel, subfamily J, member 15               | KCNJ15  | 3772        |
| 206765_at    | potassium inwardly-rectifying channel, subfamily J, member 2                | KCNJ2   | 3759        |
| 204679_at    | potassium channel, subfamily K, member 1                                    | KCNK1   | 3775        |

|              |                                                                              |                  |              |
|--------------|------------------------------------------------------------------------------|------------------|--------------|
| 223823_at    | potassium large conductance calcium-activated channel, subfamily M, beta mer | <i>KCNMB2</i>    | 10242        |
| 204487_s_at  | potassium voltage-gated channel, KQT-like subfamily, member 1                | <i>KCNQ1</i>     | 3784         |
| 234103_at    | Potassium channel, subfamily T, member 2                                     | <i>KCNT2</i>     | 343450       |
| 244455_at    | potassium channel, subfamily T, member 2                                     | <i>KCNT2</i>     | 343450       |
| 235857_at    | potassium channel tetramerisation domain containing 11                       | <i>KCTD11</i>    | 147040       |
| 212192_at    | potassium channel tetramerisation domain containing 12                       | <i>KCTD12</i>    | 115207       |
| 212188_at    | potassium channel tetramerisation domain containing 12                       | <i>KCTD12</i>    | 115207       |
| 45653_at     | potassium channel tetramerisation domain containing 13                       | <i>KCTD13</i>    | 253980       |
| 233234_at    | potassium channel tetramerisation domain containing 16                       | <i>KCTD16</i>    | 57528        |
| 226493_at    | potassium channel tetramerisation domain containing 18                       | <i>KCTD18</i>    | 130535       |
| 228299_at    | Potassium channel tetramerisation domain containing 20                       | <i>KCTD20</i>    | 222658       |
| 223176_at    | potassium channel tetramerisation domain containing 20                       | <i>KCTD20</i>    | 222658       |
| 229873_at    | potassium channel tetramerisation domain containing 21                       | <i>KCTD21</i>    | 283219       |
| 217894_at    | potassium channel tetramerisation domain containing 3                        | <i>KCTD3</i>     | 51133        |
| 238001_at    | potassium channel tetramerisation domain containing 6                        | <i>KCTD6</i>     | 200845       |
| 224316_at    | potassium channel tetramerisation domain containing 9                        | <i>KCTD9</i>     | 54793        |
| 200922_at    | KDEL (Lys-Asp-Glu-Leu) endoplasmic reticulum protein retention receptor 1    | <i>KDEL1</i>     | 10945        |
| 200698_at    | KDEL (Lys-Asp-Glu-Leu) endoplasmic reticulum protein retention receptor 2    | <i>KDEL2</i>     | 11014        |
| 200700_s_at  | KDEL (Lys-Asp-Glu-Leu) endoplasmic reticulum protein retention receptor 2    | <i>KDEL2</i>     | 11014        |
| 202417_at    | kelch-like ECH-associated protein 1                                          | <i>KEAP1</i>     | 9817         |
| 203143_s_at  | KIAA0040                                                                     | <i>KIAA0040</i>  | 9674         |
| 212380_at    | KIAA0082                                                                     | <i>KIAA0082</i>  | 23070        |
| 202503_s_at  | KIAA0101                                                                     | <i>KIAA0101</i>  | 9768         |
| 211713_x_at  | KIAA0101                                                                     | <i>KIAA0101</i>  | 9768         |
| 212149_at    | KIAA0143 protein                                                             | <i>KIAA0143</i>  | 23167        |
| 212523_s_at  | KIAA0146                                                                     | <i>KIAA0146</i>  | 23514        |
| 228325_at    | KIAA0146                                                                     | <i>KIAA0146</i>  | 23514        |
| 200616_s_at  | KIAA0152                                                                     | <i>KIAA0152</i>  | 9761         |
| 212837_at    | KIAA0157                                                                     | <i>KIAA0157</i>  | 23172        |
| 200851_s_at  | KIAA0174                                                                     | <i>KIAA0174</i>  | 9798         |
| 232988_at    | KIAA0182                                                                     | <i>KIAA0182</i>  | 23199        |
| 202650_s_at  | KIAA0195                                                                     | <i>KIAA0195</i>  | 9772         |
| 201985_at    | KIAA0196                                                                     | <i>KIAA0196</i>  | 9897         |
| 212441_at    | KIAA0232                                                                     | <i>KIAA0232</i>  | 9778         |
| 212474_at    | KIAA0241                                                                     | <i>KIAA0241</i>  | 23080        |
| 212471_at    | KIAA0241                                                                     | <i>KIAA0241</i>  | 23080        |
| 202181_at    | KIAA0247                                                                     | <i>KIAA0247</i>  | 9766         |
| 210111_s_at  | KIAA0265 protein                                                             | <i>KIAA0265</i>  | 23008        |
| 36612_at     | KIAA0280                                                                     | <i>KIAA0280</i>  | 23201        |
| 212357_at    | KIAA0280                                                                     | <i>KIAA0280</i>  | 23201        |
| 212619_at    | KIAA0286 protein                                                             | <i>KIAA0286</i>  | 23306        |
| 222468_at    | KIAA0319-like                                                                | <i>KIAA0319L</i> | 79932        |
| 212355_at    | KIAA0323                                                                     | <i>KIAA0323</i>  | 23351        |
| 204308_s_at  | KIAA0329                                                                     | <i>KIAA0329</i>  | 9895         |
| 236368_at    | KIAA0368                                                                     | <i>KIAA0368</i>  | 23392        |
| 203049_s_at  | KIAA0372                                                                     | <i>KIAA0372</i>  | 9652         |
| 203048_s_at  | KIAA0372                                                                     | <i>KIAA0372</i>  | 9652         |
| 203171_s_at  | KIAA0409                                                                     | <i>KIAA0409</i>  | 23378        |
| 209913_x_at  | KIAA0415                                                                     | <i>KIAA0415</i>  | 9907         |
| 209912_s_at  | KIAA0415                                                                     | <i>KIAA0415</i>  | 9907         |
| 202386_s_at  | KIAA0430                                                                     | <i>KIAA0430</i>  | 9665         |
| 212553_at    | KIAA0460                                                                     | <i>KIAA0460</i>  | 23248        |
| 214295_at    | KIAA0485 protein                                                             | <i>KIAA0485</i>  | 57235        |
| 1559023_a_at | KIAA0494                                                                     | <i>KIAA0494</i>  | 9813         |
| 213340_s_at  | KIAA0495                                                                     | <i>KIAA0495</i>  | 57212        |
| 204074_s_at  | KIAA0562                                                                     | <i>KIAA0562</i>  | 9731         |
| 204075_s_at  | KIAA0562                                                                     | <i>KIAA0562</i>  | 9731         |
| 37232_at     | KIAA0586                                                                     | <i>KIAA0586</i>  | 9786         |
| 209021_x_at  | KIAA0652                                                                     | <i>KIAA0652</i>  | 9776         |
| 213118_at    | KIAA0701 protein                                                             | <i>KIAA0701</i>  | 23074        |
| 1554292_a_at | KIAA0701 protein                                                             | <i>KIAA0701</i>  | 23074        |
| 213120_at    | KIAA0701 protein                                                             | <i>KIAA0701</i>  | 23074        |
| 212314_at    | KIAA0746 protein                                                             | <i>KIAA0746</i>  | 23231 /// 34 |



|              |                                                                            |                               |              |
|--------------|----------------------------------------------------------------------------|-------------------------------|--------------|
| 212311_at    | KIAA0746 protein                                                           | KIAA0746                      | 23231 /// 34 |
| 230232_at    | KIAA0746 protein                                                           | KIAA0746                      | 23231        |
| 235353_at    | KIAA0746 protein                                                           | KIAA0746                      | 23231        |
| 219724_s_at  | KIAA0748                                                                   | KIAA0748                      | 9840         |
| 204711_at    | KIAA0753                                                                   | KIAA0753                      | 9851         |
| 212634_at    | KIAA0776                                                                   | KIAA0776                      | 23376        |
| 213358_at    | KIAA0802                                                                   | KIAA0802                      | 23255        |
| 36888_at     | KIAA0841                                                                   | KIAA0841                      | 23354        |
| 235048_at    | KIAA0888 protein                                                           | KIAA0888                      | 26049        |
| 213954_at    | KIAA0888 protein                                                           | KIAA0888                      | 26049        |
| 212359_s_at  | KIAA0913                                                                   | KIAA0913                      | 23053        |
| 209654_at    | KIAA0947 protein                                                           | KIAA0947                      | 23379        |
| 213463_s_at  | KIAA0974                                                                   | KIAA0974                      | 317662       |
| 213896_x_at  | KIAA0974                                                                   | KIAA0974                      | 317662       |
| 213034_at    | KIAA0999 protein                                                           | KIAA0999                      | 23387        |
| 204156_at    | KIAA0999 protein                                                           | KIAA0999                      | 23387        |
| 204157_s_at  | KIAA0999 protein                                                           | KIAA0999                      | 23387        |
| 1554929_at   | KIAA0999 protein                                                           | KIAA0999                      | 23387        |
| 204155_s_at  | KIAA0999 protein                                                           | KIAA0999                      | 23387        |
| 206006_s_at  | KIAA1009                                                                   | KIAA1009                      | 22832        |
| 206005_s_at  | KIAA1009                                                                   | KIAA1009                      | 22832        |
| 213478_at    | kazrin                                                                     | KIAA1026                      | 23254        |
| 212795_at    | KIAA1033                                                                   | KIAA1033                      | 23325        |
| 212794_s_at  | KIAA1033                                                                   | KIAA1033                      | 23325        |
| 215936_s_at  | KIAA1033                                                                   | KIAA1033                      | 23325        |
| 1558293_at   | KIAA1107                                                                   | KIAA1107                      | 23285        |
| 214098_at    | KIAA1107                                                                   | KIAA1107                      | 23285        |
| 233096_at    | KIAA1109                                                                   | KIAA1109                      | 84162        |
| 1553793_a_at | KIAA1109                                                                   | KIAA1109                      | 84162        |
| 233227_at    | KIAA1109                                                                   | KIAA1109                      | 84162        |
| 1554131_at   | KIAA1128                                                                   | KIAA1128                      | 54462        |
| 209378_s_at  | KIAA1128                                                                   | KIAA1128                      | 54462        |
| 1554132_a_at | KIAA1128                                                                   | KIAA1128                      | 54462        |
| 227493_s_at  | KIAA1143                                                                   | KIAA1143                      | 57456        |
| 223162_s_at  | KIAA1147                                                                   | KIAA1147                      | 57189        |
| 1562063_x_at | neuroblastoma breakpoint family, member 1 /// neuroblastoma breakpoint fam | KIAA1245 /// LOC7 100132406 , |              |
| 1562062_at   | neuroblastoma breakpoint family, member 1 /// neuroblastoma breakpoint fam | KIAA1245 /// LOC7 100132406 , |              |
| 214693_x_at  | neuroblastoma breakpoint family, member 14 /// neuroblastoma breakpoint fa | KIAA1245 /// LOC7 100132406 , |              |
| 212453_at    | KIAA1279                                                                   | KIAA1279                      | 26128        |
| 221874_at    | KIAA1324                                                                   | KIAA1324                      | 57535        |
| 235301_at    | KIAA1324-like                                                              | KIAA1324L                     | 222223       |
| 223256_at    | KIAA1333                                                                   | KIAA1333                      | 55632        |
| 223255_at    | KIAA1333                                                                   | KIAA1333                      | 55632        |
| 223258_s_at  | KIAA1333                                                                   | KIAA1333                      | 55632        |
| 225327_at    | KIAA1370                                                                   | KIAA1370                      | 56204        |
| 235956_at    | KIAA1377                                                                   | KIAA1377                      | 57562        |
| 232166_at    | KIAA1377                                                                   | KIAA1377                      | 57562        |
| 226254_s_at  | KIAA1430                                                                   | KIAA1430                      | 57587        |
| 225924_at    | KIAA1450 protein                                                           | KIAA1450                      | 57600        |
| 225922_at    | KIAA1450 protein                                                           | KIAA1450                      | 57600        |
| 226460_at    | KIAA1450 protein                                                           | KIAA1450                      | 57600        |
| 225506_at    | KIAA1468                                                                   | KIAA1468                      | 57614        |
| 227091_at    | KIAA1505 protein                                                           | KIAA1505                      | 57639        |
| 231855_at    | KIAA1524                                                                   | KIAA1524                      | 57650        |
| 1553810_a_at | KIAA1524                                                                   | KIAA1524                      | 57650        |
| 233893_s_at  | KIAA1530 protein                                                           | KIAA1530                      | 57654        |
| 1555107_a_at | KIAA1530 protein                                                           | KIAA1530                      | 57654        |
| 234952_s_at  | CTD-binding SR-like protein rA9                                            | KIAA1542                      | 57661        |
| 225703_at    | KIAA1545 protein                                                           | KIAA1545                      | 57666        |
| 1569385_s_at | KIAA1546                                                                   | KIAA1546                      | 54790        |
| 235461_at    | KIAA1546                                                                   | KIAA1546                      | 54790        |
| 231869_at    | KIAA1586                                                                   | KIAA1586                      | 57691        |
| 241347_at    | KIAA1618                                                                   | KIAA1618                      | 57714        |

|              |                                                                          |                    |        |
|--------------|--------------------------------------------------------------------------|--------------------|--------|
| 227638_at    | KIAA1632                                                                 | KIAA1632           | 57724  |
| 214723_x_at  | KIAA1641                                                                 | KIAA1641           | 57730  |
| 220940_at    | KIAA1641                                                                 | KIAA1641           | 57730  |
| 244189_at    | KIAA1648 protein                                                         | KIAA1648           | 284900 |
| 1556060_a_at | KIAA1702 protein                                                         | KIAA1702           | 80822  |
| 229078_s_at  | KIAA1704                                                                 | KIAA1704           | 55425  |
| 229891_x_at  | KIAA1704                                                                 | KIAA1704           | 55425  |
| 223606_x_at  | KIAA1704                                                                 | KIAA1704           | 55425  |
| 241426_at    | KIAA1712                                                                 | KIAA1712           | 80817  |
| 228334_x_at  | KIAA1712                                                                 | KIAA1712           | 80817  |
| 225717_at    | KIAA1715                                                                 | KIAA1715           | 80856  |
| 229173_at    | KIAA1715                                                                 | KIAA1715           | 80856  |
| 226909_at    | KIAA1729 protein                                                         | KIAA1729           | 85460  |
| 1569302_at   | KIAA1731                                                                 | KIAA1731           | 85459  |
| 225623_at    | KIAA1737                                                                 | KIAA1737           | 85457  |
| 216807_at    | KIAA1751                                                                 | KIAA1751           | 85452  |
| 225582_at    | KIAA1754                                                                 | KIAA1754           | 85450  |
| 233977_at    | KIAA1772                                                                 | KIAA1772           | 80000  |
| 226703_at    | KIAA1787 protein                                                         | KIAA1787           | 84461  |
| 228565_at    | mixed lineage kinase 4                                                   | KIAA1804           | 84451  |
| 227778_at    | hypothetical protein KIAA1833                                            | KIAA1833           | 727957 |
| 243539_at    | KIAA1841                                                                 | KIAA1841           | 84542  |
| 230441_at    | KIAA1909 protein                                                         | KIAA1909           | 153478 |
| 238828_at    | KIAA1919                                                                 | KIAA1919           | 91749  |
| 227370_at    | KIAA1946                                                                 | KIAA1946           | 165215 |
| 242762_s_at  | KIAA1946                                                                 | KIAA1946           | 165215 |
| 238564_at    | KIAA1946                                                                 | KIAA1946           | 165215 |
| 224927_at    | KIAA1949                                                                 | KIAA1949           | 170954 |
| 224706_at    | KIAA2013                                                                 | KIAA2013           | 90231  |
| 224708_at    | KIAA2013                                                                 | KIAA2013           | 90231  |
| 227433_at    | KIAA2018                                                                 | KIAA2018           | 205717 |
| 206364_at    | kinesin family member 14                                                 | KIF14              | 9928   |
| 236641_at    | kinesin family member 14                                                 | KIF14              | 9928   |
| 219306_at    | kinesin family member 15                                                 | KIF15              | 56992  |
| 221258_s_at  | kinesin family member 18A                                                | KIF18A             | 81930  |
| 203850_s_at  | kinesin family member 1A                                                 | KIF1A              | 547    |
| 226003_at    | kinesin family member 21A                                                | KIF21A             | 55605  |
| 204411_at    | kinesin family member 21B                                                | KIF21B             | 23046  |
| 216969_s_at  | kinesin family member 22 /// kinesin-like DNA-binding protein pseudogene | KIF22 /// LOC7280: | 3835   |
| 244427_at    | Kinesin family member 23                                                 | KIF23              | 9493   |
| 226480_at    | Kinesin heavy chain member 2A                                            | KIF2A              | ---    |
| 213598_at    | Kinesin heavy chain member 2A                                            | KIF2A              | ---    |
| 209408_at    | kinesin family member 2C                                                 | KIF2C              | 11004  |
| 211519_s_at  | kinesin family member 2C                                                 | KIF2C              | 11004  |
| 228680_at    | kinesin family member 3A                                                 | KIF3A              | 11127  |
| 213623_at    | kinesin family member 3A                                                 | KIF3A              | 11127  |
| 225205_at    | kinesin family member 3B                                                 | KIF3B              | 9371   |
| 201991_s_at  | kinesin family member 5B                                                 | KIF5B              | 3799   |
| 201992_s_at  | kinesin family member 5B                                                 | KIF5B              | 3799   |
| 232695_at    | kinesin family member 6                                                  | KIF6               | 221458 |
| 203333_at    | kinesin-associated protein 3                                             | KIFAP3             | 22920  |
| 242517_at    | KISS1 receptor                                                           | KISS1R             | 84634  |
| 205051_s_at  | v-kit Hardy-Zuckerman 4 feline sarcoma viral oncogene homolog            | KIT                | 3815   |
| 212878_s_at  | kinesin light chain 1                                                    | KLC1               | 3831   |
| 212877_at    | kinesin light chain 1                                                    | KLC1               | 3831   |
| 202393_s_at  | Kruppel-like factor 10                                                   | KLF10              | 7071   |
| 225390_s_at  | Kruppel-like factor 13                                                   | KLF13              | 51621  |
| 219878_s_at  | Kruppel-like factor 13                                                   | KLF13              | 51621  |
| 225140_at    | Kruppel-like factor 3 (basic)                                            | KLF3               | 51274  |
| 219657_s_at  | Kruppel-like factor 3 (basic)                                            | KLF3               | 51274  |
| 209211_at    | Kruppel-like factor 5 (intestinal)                                       | KLF5               | 688    |
| 1555832_s_at | Kruppel-like factor 6                                                    | KLF6               | 1316   |
| 208960_s_at  | Kruppel-like factor 6                                                    | KLF6               | 1316   |

|              |                                                                                         |                                       |              |
|--------------|-----------------------------------------------------------------------------------------|---------------------------------------|--------------|
| 224606_at    | Kruppel-like factor 6                                                                   | <i>KLFB</i>                           | 1316         |
| 208961_s_at  | Kruppel-like factor 6                                                                   | <i>KLFB</i>                           | 1316         |
| 1552733_at   | kelch domain containing 1                                                               | <i>KLHDC1</i>                         | 122773       |
| 214383_x_at  | kelch domain containing 3                                                               | <i>KLHDC3</i>                         | 116138       |
| 232171_x_at  | kelch domain containing 4                                                               | <i>KLHDC4</i>                         | 54758        |
| 225961_at    | kelch domain containing 5                                                               | <i>KLHDC5</i>                         | 57542        |
| 225732_at    | kelch domain containing 5                                                               | <i>KLHDC5</i>                         | 57542        |
| 225068_at    | kelch-like 12 (Drosophila)                                                              | <i>KLHL12</i>                         | 59349        |
| 228377_at    | kelch-like 14 (Drosophila)                                                              | <i>KLHL14</i>                         | 57565        |
| 212882_at    | kelch-like 18 (Drosophila)                                                              | <i>KLHL18</i>                         | 23276        |
| 204176_at    | kelch-like 20 (Drosophila)                                                              | <i>KLHL20</i>                         | 27252        |
| 204177_s_at  | kelch-like 20 (Drosophila)                                                              | <i>KLHL20</i>                         | 27252        |
| 203068_at    | kelch-like 21 (Drosophila)                                                              | <i>KLHL21</i>                         | 9903         |
| 221985_at    | kelch-like 24 (Drosophila)                                                              | <i>KLHL24</i>                         | 54800        |
| 226158_at    | kelch-like 24 (Drosophila)                                                              | <i>KLHL24</i>                         | 54800        |
| 221986_s_at  | kelch-like 24 (Drosophila)                                                              | <i>KLHL24</i>                         | 54800        |
| 242088_at    | kelch-like 24 (Drosophila)                                                              | <i>KLHL24</i>                         | 54800        |
| 1560396_at   | kelch-like 6 (Drosophila)                                                               | <i>KLHL6</i>                          | 89857        |
| 1555275_a_at | kelch-like 6 (Drosophila)                                                               | <i>KLHL6</i>                          | 89857        |
| 1560397_s_at | kelch-like 6 (Drosophila)                                                               | <i>KLHL6</i>                          | 89857        |
| 223250_at    | kelch-like 7 (Drosophila)                                                               | <i>KLHL7</i>                          | 55975        |
| 1561206_at   | kelch-like 8 (Drosophila)                                                               | <i>KLHL8</i>                          | 57563        |
| 213233_s_at  | kelch-like 9 (Drosophila)                                                               | <i>KLHL9</i>                          | 55958        |
| 207229_at    | killer cell lectin-like receptor subfamily A, member 1                                  | <i>KLRA1</i>                          | 10748        |
| 214470_at    | killer cell lectin-like receptor subfamily B, member 1                                  | <i>KLRB1</i>                          | 3820         |
| 206785_s_at  | killer cell lectin-like receptor subfamily C, member 1 /// killer cell lectin-like rece | <i>KLRC1 /// KLRC2</i>                | 3821 /// 382 |
| 210690_at    | killer cell lectin-like receptor subfamily C, member 4                                  | <i>KLRC4</i>                          | 8302         |
| 1555691_a_at | killer cell lectin-like receptor subfamily C, member 4 /// killer cell lectin-like rece | <i>KLRC4 /// KLRK1</i>                | 22914 /// 82 |
| 220646_s_at  | killer cell lectin-like receptor subfamily F, member 1                                  | <i>KLRF1</i>                          | 51348        |
| 205821_at    | killer cell lectin-like receptor subfamily K, member 1                                  | <i>KLRK1</i>                          | 22914        |
| 205307_s_at  | kynurenine 3-monooxygenase (kynurenine 3-hydroxylase)                                   | <i>KMO</i>                            | 8564         |
| 202059_s_at  | karyopherin alpha 1 (importin alpha 5)                                                  | <i>KPNA1</i>                          | 3836         |
| 213741_s_at  | karyopherin alpha 1 (importin alpha 5)                                                  | <i>KPNA1</i>                          | 3836         |
| 202058_s_at  | karyopherin alpha 1 (importin alpha 5)                                                  | <i>KPNA1</i>                          | 3836         |
| 201088_at    | karyopherin alpha 2 (RAG cohort 1, importin alpha 1)                                    | <i>KPNA2</i>                          | 3838 /// 728 |
| 211762_s_at  | karyopherin alpha 2 (RAG cohort 1, importin alpha 1)                                    | <i>KPNA2</i>                          | 3838 /// 728 |
| 225267_at    | karyopherin alpha 4 (importin alpha 3)                                                  | <i>KPNA4</i>                          | 3840         |
| 209653_at    | karyopherin alpha 4 (importin alpha 3)                                                  | <i>KPNA4</i>                          | 3840         |
| 206241_at    | karyopherin alpha 5 (importin alpha 6)                                                  | <i>KPNA5</i>                          | 3841         |
| 213574_s_at  | Karyopherin (importin) beta 1                                                           | <i>KPNB1</i>                          | ---          |
| 213507_s_at  | karyopherin (importin) beta 1                                                           | <i>KPNB1</i>                          | 3837         |
| 208975_s_at  | karyopherin (importin) beta 1                                                           | <i>KPNB1</i>                          | 3837         |
| 217027_x_at  | karyopherin (importin) beta 1                                                           | <i>KPNB1</i>                          | 3837         |
| 229785_at    | KRIT1, ankyrin repeat containing                                                        | <i>KRIT1</i>                          | 889          |
| 203202_at    | KRR1, small subunit (SSU) processome component, homolog (yeast)                         | <i>KRR1</i>                           | 11103        |
| 232441_at    | KRR1, small subunit (SSU) processome component, homolog (yeast)                         | <i>KRR1</i>                           | 11103        |
| 209008_x_at  | keratin 8                                                                               | <i>KRT8</i>                           | 3856         |
| 222060_at    | keratin 8 pseudogene 12                                                                 | <i>KRT8P12</i>                        | 90133        |
| 1562681_at   | Keratin associated protein 5-2                                                          | <i>KRTAP5-2</i>                       | 338651       |
| 224885_s_at  | keratinocyte associated protein 2                                                       | <i>KRTCAP2</i>                        | 200185       |
| 226943_at    | Keratin, hair, basic, 5                                                                 | <i>KRTHB5</i>                         | 728568       |
| 201001_s_at  | ubiquitin-conjugating enzyme E2 variant 1                                               | <i>Kua-UEV /// UBE2\ 387522 /// ;</i> |              |
| 213837_at    | l(3)mbt-like (Drosophila)                                                               | <i>L3MBTL</i>                         | 26013        |
| 210306_at    | l(3)mbt-like (Drosophila)                                                               | <i>L3MBTL</i>                         | 26013        |
| 1552490_at   | lactation elevated 1                                                                    | <i>LACE1</i>                          | 246269       |
| 226354_at    | lactamase, beta                                                                         | <i>LACTB</i>                          | 114294       |
| 1552486_s_at | lactamase, beta                                                                         | <i>LACTB</i>                          | 114294       |
| 219061_s_at  | L antigen family, member 3                                                              | <i>LAGE3</i>                          | 8270         |
| 210644_s_at  | leukocyte-associated immunoglobulin-like receptor 1                                     | <i>LAIR1</i>                          | 3903         |
| 209270_at    | laminin, beta 3                                                                         | <i>LAMB3</i>                          | 3914         |
| 215516_at    | laminin, beta 4                                                                         | <i>LAMB4</i>                          | 22798        |
| 200821_at    | lysosomal-associated membrane protein 2                                                 | <i>LAMP2</i>                          | 3920         |
| 226671_at    | Lysosomal-associated membrane protein 2                                                 | <i>LAMP2</i>                          | 3920         |

|              |                                                                                |                 |        |
|--------------|--------------------------------------------------------------------------------|-----------------|--------|
| 203041_s_at  | lysosomal-associated membrane protein 2                                        | <i>LAMP2</i>    | 3920   |
| 203042_at    | lysosomal-associated membrane protein 2                                        | <i>LAMP2</i>    | 3920   |
| 217933_s_at  | leucine aminopeptidase 3                                                       | <i>LAP3</i>     | 51056  |
| 200673_at    | lysosomal-associated protein transmembrane 4 alpha                             | <i>LAPTM4A</i>  | 9741   |
| 214039_s_at  | lysosomal associated protein transmembrane 4 beta                              | <i>LAPTM4B</i>  | 55353  |
| 201720_s_at  | lysosomal associated multispinning membrane protein 5                          | <i>LAPTM5</i>   | 7805   |
| 231824_at    | La ribonucleoprotein domain family, member 2                                   | <i>LARP2</i>    | 55132  |
| 212714_at    | La ribonucleoprotein domain family, member 4                                   | <i>LARP4</i>    | 113251 |
| 214155_s_at  | La ribonucleoprotein domain family, member 4                                   | <i>LARP4</i>    | 113251 |
| 215246_at    | La ribonucleoprotein domain family, member 7                                   | <i>LARP7</i>    | 51574  |
| 241385_at    | La ribonucleoprotein domain family, member 7                                   | <i>LARP7</i>    | 51574  |
| 217810_x_at  | leucyl-tRNA synthetase                                                         | <i>LARS</i>     | 51520  |
| 222428_s_at  | leucyl-tRNA synthetase                                                         | <i>LARS</i>     | 51520  |
| 1554253_a_at | LAG1 homolog, ceramide synthase 3                                              | <i>LASS3</i>    | 204219 |
| 212442_s_at  | LAG1 homolog, ceramide synthase 6                                              | <i>LASS6</i>    | 253782 |
| 212446_s_at  | LAG1 homolog, ceramide synthase 6                                              | <i>LASS6</i>    | 253782 |
| 235463_s_at  | LAG1 homolog, ceramide synthase 6                                              | <i>LASS6</i>    | 253782 |
| 227013_at    | LATS, large tumor suppressor, homolog 2 (Drosophila)                           | <i>LATS2</i>    | 26524  |
| 230348_at    | LATS, large tumor suppressor, homolog 2 (Drosophila)                           | <i>LATS2</i>    | 26524  |
| 213261_at    | lupus brain antigen 1                                                          | <i>LBA1</i>     | 9881   |
| 221011_s_at  | limb bud and heart development homolog (mouse)                                 | <i>LBH</i>      | 81606  |
| 244401_at    | Leber congenital amaurosis 5                                                   | <i>LCAS</i>     | 167691 |
| 204891_s_at  | lymphocyte-specific protein tyrosine kinase                                    | <i>LCK</i>      | 3932   |
| 221515_s_at  | leucine carboxyl methyltransferase 1                                           | <i>LCMT1</i>    | 51451  |
| 212531_at    | lipocalin 2 (oncogene 24p3)                                                    | <i>LCN2</i>     | 3934   |
| 232293_at    | ligand dependent nuclear receptor corepressor-like                             | <i>LCORL</i>    | 254251 |
| 208885_at    | lymphocyte cytosolic protein 1 (L-plastin)                                     | <i>LCP1</i>     | 3936   |
| 244251_at    | Lymphocyte cytosolic protein 2 (SH2 domain containing leukocyte protein of 76k | <i>LCP2</i>     | 3937   |
| 205269_at    | lymphocyte cytosolic protein 2 (SH2 domain containing leukocyte protein of 76k | <i>LCP2</i>     | 3937   |
| 244556_at    | Lymphocyte cytosolic protein 2 (SH2 domain containing leukocyte protein of 76k | <i>LCP2</i>     | 3937   |
| 205270_s_at  | lymphocyte cytosolic protein 2 (SH2 domain containing leukocyte protein of 76k | <i>LCP2</i>     | 3937   |
| 244578_at    | lymphocyte cytosolic protein 2 (SH2 domain containing leukocyte protein of 76k | <i>LCP2</i>     | 3937   |
| 216887_s_at  | LIM domain binding 3                                                           | <i>LDB3</i>     | 11155  |
| 200650_s_at  | lactate dehydrogenase A                                                        | <i>LDHA</i>     | 3939   |
| 213564_x_at  | lactate dehydrogenase B                                                        | <i>LDHB</i>     | 3945   |
| 201030_x_at  | lactate dehydrogenase B                                                        | <i>LDHB</i>     | 3945   |
| 207022_s_at  | lactate dehydrogenase C                                                        | <i>LDHC</i>     | 3948   |
| 207409_at    | leukocyte cell-derived chemotaxin 2                                            | <i>LECT2</i>    | 3950   |
| 1564776_at   | leukocyte receptor cluster (LRC) member 10                                     | <i>LENG10</i>   | ---    |
| 211037_s_at  | leukocyte receptor cluster (LRC) member 4                                      | <i>LENG4</i>    | 79143  |
| 207092_at    | leptin (obesity homolog, mouse)                                                | <i>LEP</i>      | 3952   |
| 209894_at    | leptin receptor                                                                | <i>LEPR</i>     | 3953   |
| 202377_at    | leptin receptor overlapping transcript                                         | <i>LEPROT</i>   | ---    |
| 202595_s_at  | leptin receptor overlapping transcript-like 1                                  | <i>LEPROTL1</i> | 23484  |
| 228762_at    | LFNG O-fucosylpeptide 3-beta-N-acetylglucosaminyltransferase                   | <i>LFNG</i>     | 3955   |
| 201105_at    | lectin, galactoside-binding, soluble, 1 (galectin 1)                           | <i>LGALS1</i>   | 3956   |
| 208949_s_at  | lectin, galactoside-binding, soluble, 3                                        | <i>LGALS3</i>   | 3958   |
| 1557197_a_at | Lectin, galactoside-binding, soluble, 3                                        | <i>LGALS3</i>   | 3958   |
| 208933_s_at  | lectin, galactoside-binding, soluble, 8 (galectin 8)                           | <i>LGALS8</i>   | 3964   |
| 208936_x_at  | lectin, galactoside-binding, soluble, 8 (galectin 8)                           | <i>LGALS8</i>   | 3964   |
| 208935_s_at  | lectin, galactoside-binding, soluble, 8 (galectin 8)                           | <i>LGALS8</i>   | 3964   |
| 208934_s_at  | lectin, galactoside-binding, soluble, 8 (galectin 8)                           | <i>LGALS8</i>   | 3964   |
| 210732_s_at  | lectin, galactoside-binding, soluble, 8 (galectin 8)                           | <i>LGALS8</i>   | 3964   |
| 210731_s_at  | lectin, galactoside-binding, soluble, 8 (galectin 8)                           | <i>LGALS8</i>   | 3964   |
| 203236_s_at  | lectin, galactoside-binding, soluble, 9 (galectin 9)                           | <i>LGALS9</i>   | 3965   |
| 231411_at    | Lipoma HMGIC fusion partner                                                    | <i>LHFP</i>     | 10186  |
| 236761_at    | lipoma HMGIC fusion partner-like 3                                             | <i>LHFPL3</i>   | 375612 |
| 1562736_at   | LIM homeobox 9                                                                 | <i>LHX9</i>     | 56956  |
| 205266_at    | leukemia inhibitory factor (cholinergic differentiation factor)                | <i>LIF</i>      | 3976   |
| 225571_at    | leukemia inhibitory factor receptor alpha                                      | <i>LIFR</i>     | 3977   |
| 227771_at    | leukemia inhibitory factor receptor alpha                                      | <i>LIFR</i>     | 3977   |
| 210660_at    | leukocyte immunoglobulin-like receptor, subfamily A (with TM domain), memb     | <i>LILRA1</i>   | 11024  |
| 207872_s_at  | leukocyte immunoglobulin-like receptor, subfamily A (with TM domain), memb     | <i>LILRA1</i>   | 11024  |

|              |                                                                                    |                     |                 |
|--------------|------------------------------------------------------------------------------------|---------------------|-----------------|
| 211101_x_at  | leukocyte immunoglobulin-like receptor, subfamily A (with TM domain), memb         | <i>LILRA2</i>       | 11027           |
| 211102_s_at  | leukocyte immunoglobulin-like receptor, subfamily A (with TM domain), memb         | <i>LILRA2</i>       | 11027           |
| 207857_at    | leukocyte immunoglobulin-like receptor, subfamily A (with TM domain), memb         | <i>LILRA2</i>       | 11027           |
| 211100_x_at  | leukocyte immunoglobulin-like receptor, subfamily A (with TM domain), memb         | <i>LILRA2</i>       | 11027           |
| 229937_x_at  | Leukocyte immunoglobulin-like receptor, subfamily B (with TM and ITIM domai        | <i>LILRB1</i>       | 10859           |
| 211135_x_at  | leukocyte immunoglobulin-like receptor, subfamily B (with TM and ITIM domain       | <i>LILRB3</i>       | 11025           |
| 214561_at    | leukocyte immunoglobulin-like receptor pseudogene 2                                | <i>LILRP2</i>       | 79166           |
| 217892_s_at  | LIM domain and actin binding 1                                                     | <i>LIMA1</i>        | 51474           |
| 222762_x_at  | LIM domains containing 1                                                           | <i>LIMD1</i>        | 8994            |
| 218850_s_at  | LIM domains containing 1                                                           | <i>LIMD1</i>        | 8994            |
| 218600_at    | LIM domain containing 2                                                            | <i>LIMD2</i>        | 80774           |
| 202193_at    | LIM domain kinase 2                                                                | <i>LIMK2</i>        | 3985            |
| 217475_s_at  | LIM domain kinase 2                                                                | <i>LIMK2</i>        | 3985            |
| 210582_s_at  | LIM domain kinase 2                                                                | <i>LIMK2</i>        | 3985            |
| 212687_at    | LIM and senescent cell antigen-like domains 1                                      | <i>LIMS1</i>        | 3987            |
| 207198_s_at  | LIM and senescent cell antigen-like domains 1                                      | <i>LIMS1</i>        | 3987            |
| 1570259_at   | LIM and senescent cell antigen-like domains 1                                      | <i>LIMS1</i>        | 3987            |
| 1566129_at   | LIM and senescent cell antigen-like domains 1                                      | <i>LIMS1</i>        | 3987            |
| 223800_s_at  | LIM and senescent cell antigen-like domains 3                                      | <i>LIMS3</i>        | 96626           |
| 213526_s_at  | lin-37 homolog (C. elegans)                                                        | <i>LIN37</i>        | 55957           |
| 231959_at    | lin-52 homolog (C. elegans)                                                        | <i>LIN52</i>        | 91750           |
| 240027_at    | lin-7 homolog A (C. elegans)                                                       | <i>LIN7A</i>        | 8825            |
| 206440_at    | lin-7 homolog A (C. elegans)                                                       | <i>LIN7A</i>        | 8825            |
| 201847_at    | lipase A, lysosomal acid, cholesterol esterase (Wolman disease)                    | <i>LIPA</i>         | 3988            |
| 200704_at    | lipopolysaccharide-induced TNF factor                                              | <i>LITAF</i>        | 9516            |
| 200706_s_at  | lipopolysaccharide-induced TNF factor                                              | <i>LITAF</i>        | 9516            |
| 200805_at    | lectin, mannose-binding 2                                                          | <i>LMAN2</i>        | 10960           |
| 218191_s_at  | LMBR1 domain containing 1                                                          | <i>LMBRD1</i>       | 55788           |
| 232893_at    | LMBR1 domain containing 2                                                          | <i>LMBRD2</i>       | 92255           |
| 204249_s_at  | LIM domain only 2 (rhombotin-like 1)                                               | <i>LMO2</i>         | 4005            |
| 209205_s_at  | LIM domain only 4                                                                  | <i>LMO4</i>         | 8543            |
| 1564469_at   | leiomodlin 3 (fetal)                                                               | <i>LMOD3</i>        | 56203           |
| 207904_s_at  | leucyl/cystinyl aminopeptidase                                                     | <i>LNPEP</i>        | 4012            |
| 231866_at    | leucyl/cystinyl aminopeptidase                                                     | <i>LNPEP</i>        | 4012            |
| 225176_at    | leucyl/cystinyl aminopeptidase                                                     | <i>LNPEP</i>        | ---             |
| 223611_s_at  | ligand of numb-protein X 1                                                         | <i>LNX1</i>         | 84708           |
| 236886_at    | Unknown                                                                            | <i>LOC100049716</i> | 100049716       |
| 228647_at    | unknown                                                                            | <i>LOC100049716</i> | 100049716       |
| 212178_s_at  | POM121 membrane glycoprotein (rat) /// POM121 membrane glycoprotein (rat           | <i>LOC100101267</i> | 100101267 ,     |
| 213360_s_at  | POM121 membrane glycoprotein (rat) /// POM121 membrane glycoprotein (rat           | <i>LOC100101267</i> | 100101267 ,     |
| 232190_x_at  | hypothetical protein LOC115110                                                     | <i>LOC115110</i>    | 115110          |
| 224981_at    | hypothetical protein BC017488                                                      | <i>LOC124446</i>    | 124446          |
| 1555988_a_at | hypothetical protein LOC126536                                                     | <i>LOC126536</i>    | 126536          |
| 217346_at    | peptidylprolyl isomerase A (cyclophilin A) /// similar to peptidylprolyl isomerase | <i>LOC128192</i>    | LOC128192 /// : |
| 226702_at    | hypothetical protein LOC129607                                                     | <i>LOC129607</i>    | 129607          |
| 212017_at    | p20                                                                                | <i>LOC130074</i>    | 130074          |
| 229946_at    | p20                                                                                | <i>LOC130074</i>    | 130074          |
| 231504_at    | hypothetical protein BC015395                                                      | <i>LOC130940</i>    | 130940          |
| 1564757_a_at | hypothetical protein BC015395                                                      | <i>LOC130940</i>    | 130940          |
| 238865_at    | similar to poly(A) binding protein, cytoplasmic 4 (inducible form)                 | <i>LOC132430</i>    | 132430          |
| 238903_at    | hypothetical protein LOC137886                                                     | <i>LOC137886</i>    | 137886          |
| 1565644_at   | Hypothetical protein LOC143286                                                     | <i>LOC143286</i>    | ---             |
| 223845_at    | hypothetical protein BC001437                                                      | <i>LOC144305</i>    | 144305          |
| 1564139_at   | hypothetical protein LOC144571                                                     | <i>LOC144571</i>    | 144571          |
| 1556021_at   | hypothetical protein LOC144874                                                     | <i>LOC144874</i>    | ---             |
| 229073_at    | Hypothetical protein LOC145786                                                     | <i>LOC145786</i>    | 145786          |
| 229178_at    | hypothetical protein LOC145786                                                     | <i>LOC145786</i>    | 145786          |
| 1564203_at   | hypothetical protein LOC147004                                                     | <i>LOC147004</i>    | 147004          |
| 1558256_at   | hypothetical protein LOC148189                                                     | <i>LOC148189</i>    | 148189          |
| 242663_at    | Hypothetical protein LOC148189                                                     | <i>LOC148189</i>    | 148189          |
| 1557049_at   | Hypothetical protein LOC149478                                                     | <i>LOC149478</i>    | 149478          |
| 244231_at    | hypothetical protein LOC149684                                                     | <i>LOC149684</i>    | 149684          |
| 230502_s_at  | Hypothetical protein LOC149832                                                     | <i>LOC149832</i>    | 149832          |

|              |                                                                                                                                             |                                |              |
|--------------|---------------------------------------------------------------------------------------------------------------------------------------------|--------------------------------|--------------|
| 228456_s_at  | hypothetical protein LOC149832                                                                                                              | LOC149832                      | 149832       |
| 229295_at    | hypothetical protein LOC150166                                                                                                              | LOC150166                      | 150166       |
| 1555898_at   | Hypothetical protein LOC150759                                                                                                              | LOC150759                      | 400986       |
| 213703_at    | hypothetical protein LOC150759                                                                                                              | LOC150759                      | 150759       |
| 201047_x_at  | RAB6A, member RAS oncogene family /// RAB6C-like                                                                                            | LOC150786 /// RAE 5870         |              |
| 210406_s_at  | RAB6A, member RAS oncogene family /// RAB6C, member RAS oncogene family                                                                     | LOC150786 /// RAE 5870 /// 840 |              |
| 212098_at    | hypothetical protein LOC151162                                                                                                              | LOC151162                      | 151162       |
| 1559105_at   | hypothetical protein LOC152084                                                                                                              | LOC152084                      | 389170       |
| 225657_at    | hypothetical protein BC007882                                                                                                               | LOC152217                      | 152217       |
| 228046_at    | Hypothetical protein LOC152485                                                                                                              | LOC152485                      | 152485       |
| 1569995_at   | similar to RIKEN cDNA 4933434120                                                                                                            | LOC152586                      | 152586       |
| 215978_x_at  | hypothetical protein LOC152719                                                                                                              | LOC152719                      | 152719       |
| 240167_at    | hypothetical protein LOC152742                                                                                                              | LOC152742                      | 152742       |
| 225957_at    | adult retina protein                                                                                                                        | LOC153222                      | 153222       |
| 225956_at    | adult retina protein                                                                                                                        | LOC153222                      | 153222       |
| 1554229_at   | adult retina protein                                                                                                                        | LOC153222                      | 153222       |
| 238476_at    | adult retina protein                                                                                                                        | LOC153222                      | 153222       |
| 231372_at    | Similar to CG4995 gene product                                                                                                              | LOC153328                      | ---          |
| 1556750_at   | hypothetical protein LOC153577                                                                                                              | LOC153577                      | 153577       |
| 232645_at    | hypothetical protein LOC153684                                                                                                              | LOC153684                      | 153684       |
| 1561085_at   | hypothetical protein LOC153910                                                                                                              | LOC153910                      | 153910       |
| 227868_at    | hypothetical protein LOC154761                                                                                                              | LOC154761                      | 154761       |
| 1560119_at   | hypothetical protein LOC157278 /// olfactory receptor, family 7, subfamily E, member 1                                                      | LOC157278 /// LOC 389634       |              |
| 231377_at    | similar to Ab2-183                                                                                                                          | LOC158830                      | 158830       |
| 211014_s_at  | promyelocytic leukemia /// hypothetical protein LOC161527 /// similar to promyelocytic leukemia protein                                     | LOC161527 /// LOC 161527 /// 5 |              |
| 227954_at    | hypothetical protein LOC162073                                                                                                              | LOC162073                      | 162073       |
| 1564785_at   | hypothetical protein LOC196913                                                                                                              | LOC196913                      | 196913       |
| 233209_at    | Hypothetical protein LOC200609                                                                                                              | LOC200609                      | 200609       |
| 1558641_at   | hypothetical protein LOC202051                                                                                                              | LOC202051                      | 202051       |
| 214945_at    | hypothetical protein LOC202134 /// NY-REN-7 antigen /// hypothetical protein LOC202134                                                      | LOC202134 /// LOC 202134 /// 1 |              |
| 225654_at    | hypothetical protein LOC202347                                                                                                              | LOC202347                      | 64324        |
| 235587_at    | hypothetical protein LOC202781                                                                                                              | LOC202781                      | 202781       |
| 232034_at    | hypothetical protein LOC203274                                                                                                              | LOC203274                      | 203274       |
| 1554517_x_at | Hypothetical protein LOC203274 /// Full-length cDNA clone CS0DD001YM12 of                                                                   | LOC203274                      | 203274       |
| 1554516_at   | Hypothetical protein LOC203274 /// Full-length cDNA clone CS0DD001YM12 of                                                                   | LOC203274                      | 203274       |
| 226760_at    | membrane-bound transcription factor peptidase, site 2 /// hypothetical protein                                                              | LOC203411 /// MB 51360         |              |
| 225556_at    | hypothetical protein LOC203547                                                                                                              | LOC203547                      | 203547       |
| 243293_at    | succinate dehydrogenase complex, subunit A, flavoprotein pseudogene /// succinate dehydrogenase complex, subunit A, flavoprotein pseudogene | LOC220729 /// SDF 220729 /// 1 |              |
| 233013_x_at  | hypothetical protein LOC220906                                                                                                              | LOC220906                      | 220906       |
| 236832_at    | hypothetical LOC221442                                                                                                                      | LOC221442                      | 221442       |
| 51774_s_at   | hypothetical protein LOC222070                                                                                                              | LOC222070                      | 222070       |
| 58900_at     | hypothetical protein LOC222070                                                                                                              | LOC222070                      | 222070       |
| 233732_at    | Hypothetical protein LOC222159                                                                                                              | LOC222159                      | 401320       |
| 1558458_at   | Hypothetical protein LOC222159                                                                                                              | LOC222159                      | 401320       |
| 215002_at    | KIAA0220-like protein /// hypothetical protein LOC339047 /// hypothetical protein LOC339047                                                 | LOC23117 /// LOC 100132247 ,   |              |
| 1557059_at   | Hypothetical protein LOC254128                                                                                                              | LOC254128                      | 254128       |
| 235132_at    | hypothetical protein LOC254128                                                                                                              | LOC254128                      | 254128       |
| 229466_at    | hypothetical protein LOC256273                                                                                                              | LOC256273                      | 256273 /// 5 |
| 1556464_a_at | hypothetical protein LOC257407                                                                                                              | LOC257407                      | 257407       |
| 244597_at    | Viral DNA polymerase-transactivated protein 6                                                                                               | LOC26010                       | 26010        |
| 1554840_at   | putative anti-CNG alpha 1 cation channel translation product                                                                                | LOC280665                      | 280665       |
| 1562527_at   | hypothetical protein LOC283027                                                                                                              | LOC283027                      | 283027       |
| 221154_at    | tripartite motif-containing 49 /// similar to Tripartite motif protein 49 (RING finger domain)                                              | LOC283116 /// LOC 57093        |              |
| 1556319_at   | hypothetical protein LOC283270                                                                                                              | LOC283270                      | 283270       |
| 235151_at    | hypothetical protein LOC283357                                                                                                              | LOC283357                      | 283357       |
| 229528_at    | hypothetical protein LOC283378                                                                                                              | LOC283378                      | 283378       |
| 1561536_at   | hypothetical protein LOC283435                                                                                                              | LOC283435                      | 283435       |
| 1557821_at   | hypothetical protein LOC283547                                                                                                              | LOC283547                      | 283547       |
| 1561442_at   | hypothetical LOC283585                                                                                                                      | LOC283585                      | 283585       |
| 1557113_at   | hypothetical protein LOC283588                                                                                                              | LOC283588                      | 283588       |
| 230245_s_at  | hypothetical protein LOC283663                                                                                                              | LOC283663                      | 283663       |
| 226682_at    | hypothetical protein LOC283666                                                                                                              | LOC283666                      | 283666       |
| 236266_at    | Hypothetical protein LOC283666                                                                                                              | LOC283666                      | 283666       |

|              |                                                                                         |                   |               |
|--------------|-----------------------------------------------------------------------------------------|-------------------|---------------|
| 1560707_at   | hypothetical protein LOC283856                                                          | LOC283856         | 283856        |
| 1561518_at   | hypothetical protein LOC283914                                                          | LOC283914         | 283914        |
| 225749_at    | Hypothetical protein LOC283951                                                          | LOC283951         | 283951        |
| 1557399_at   | hypothetical protein LOC284009                                                          | LOC284009         | 284009        |
| 1558723_at   | hypothetical protein LOC284014                                                          | LOC284014         | 284014        |
| 238096_at    | hypothetical protein LOC284023                                                          | LOC284023         | 284023        |
| 240979_at    | Hypothetical protein LOC284100                                                          | LOC284100         | 284100        |
| 1558903_at   | hypothetical gene supported by BC011527; BC021928; BC011527; BC021928                   | LOC284260         | 284260        |
| 227478_at    | hypothetical protein LOC284262                                                          | LOC284262         | 26040         |
| 1558809_s_at | hypothetical protein LOC284408                                                          | LOC284408         | 284408        |
| 1555847_a_at | hypothetical protein LOC284454                                                          | LOC284454         | 284454        |
| 240661_at    | hypothetical protein LOC284475                                                          | LOC284475         | 284475        |
| 236846_at    | hypothetical protein LOC284757                                                          | LOC284757         | 284757        |
| 1557570_a_at | hypothetical protein LOC285084                                                          | LOC285084         | 285084        |
| 226561_at    | hypothetical protein LOC285086                                                          | LOC285086         | 285086        |
| 236166_at    | hypothetical protein LOC285147                                                          | LOC285147         | 285147        |
| 1558601_at   | hypothetical protein LOC285194                                                          | LOC285194         | 285194        |
| 1561096_at   | hypothetical protein LOC285419                                                          | LOC285419         | 285419        |
| 227270_at    | hypothetical protein LOC285550                                                          | LOC285550         | 285550        |
| 1563489_at   | hypothetical protein LOC285638                                                          | LOC285638         | 285638        |
| 1561691_at   | hypothetical protein LOC285735                                                          | LOC285735         | 285735        |
| 237614_at    | hypothetical protein LOC285740                                                          | LOC285740         | 285740        |
| 230179_at    | hypothetical protein LOC285812                                                          | LOC285812         | 285812        |
| 239068_at    | hypothetical protein LOC285831                                                          | LOC285831         | 2794          |
| 1560692_at   | V-set and transmembrane domain containing 2A /// hypothetical protein LOC285878 /// VST | LOC285878         | 222008 /// 34 |
| 1563781_at   | hypothetical protein LOC285949                                                          | LOC285949         | 285949        |
| 1552670_a_at | hypothetical protein LOC286044                                                          | LOC286044         | 79660         |
| 222662_at    | hypothetical protein LOC286044                                                          | LOC286044         | 79660         |
| 241370_at    | hypothetical protein LOC286052                                                          | LOC286052         | 286052        |
| 243304_at    | hypothetical protein LOC286109                                                          | LOC286109         | 286109        |
| 1569887_a_at | hypothetical protein LOC286135                                                          | LOC286135         | 286135        |
| 225603_s_at  | Hypothetical protein LOC286144                                                          | LOC286144         | 286144        |
| 225599_s_at  | hypothetical protein LOC286144                                                          | LOC286144         | 286144        |
| 225600_at    | hypothetical protein LOC286144                                                          | LOC286144         | 286144        |
| 225033_at    | hypothetical protein LOC286167                                                          | LOC286167         | 286167        |
| 226395_at    | hypothetical protein LOC286170                                                          | LOC286170         | 84376         |
| 1556421_at   | hypothetical protein LOC286189                                                          | LOC286189         | 286189        |
| 1559765_a_at | hypothetical protein LOC286254                                                          | LOC286254         | 286254        |
| 232182_at    | hypothetical protein LOC286272                                                          | LOC286272         | 286272        |
| 1561225_at   | hypothetical protein LOC338579                                                          | LOC338579         | 338579        |
| 238893_at    | hypothetical protein LOC338758                                                          | LOC338758         | 338758        |
| 226235_at    | hypothetical protein LOC339290                                                          | LOC339290         | 339290        |
| 1562908_at   | hypothetical protein LOC339468                                                          | LOC339468         | 339468        |
| 225659_at    | hypothetical protein LOC339745                                                          | LOC339745         | 339745        |
| 1557664_at   | hypothetical protein LOC340239                                                          | LOC340239         | 340239        |
| 215823_x_at  | poly(A) binding protein, cytoplasmic 3 /// poly(A) binding protein, cytoplasmic 1       | LOC341315 /// LOC | 26986 /// 34  |
| 239466_at    | hypothetical LOC344595                                                                  | LOC344595         | 344595        |
| 225329_at    | hypothetical protein LOC348262                                                          | LOC348262         | 348262        |
| 227181_at    | hypothetical protein LOC348801                                                          | LOC348801         | 348801        |
| 1569882_at   | BC048124                                                                                | LOC348808         | 348808        |
| 233934_at    | Hypothetical protein LOC349160                                                          | LOC349160         | 349160        |
| 240572_s_at  | CLR pseudogene                                                                          | LOC374443         | 374443        |
| 1558982_at   | hypothetical LOC375010                                                                  | LOC375010         | 375010        |
| 1566147_a_at | hypothetical LOC375010                                                                  | LOC375010         | 375010        |
| 237737_at    | hypothetical LOC375010 /// hypothetical LOC401131 /// hypothetical LOC64316             | LOC375010 /// LOC | 727770        |
| 227099_s_at  | hypothetical LOC387763                                                                  | LOC387763         | 387763        |
| 213801_x_at  | ribosomal protein SA /// similar to 40S ribosomal protein SA (p40) (34/67 kDa la        | LOC387867 /// LOC | 388524 /// 34 |
| 244498_x_at  | similar to ubiquitin-conjugating enzyme E2Q 2 /// hypothetical LOC388160 /// h          | LOC388153 /// LOC | 440296        |
| 1560773_at   | hypothetical gene supported by BC040718                                                 | LOC388458         | 388458        |
| 238768_at    | hypothetical LOC388969                                                                  | LOC388969         | 388969        |
| 221878_at    | hypothetical LOC388969                                                                  | LOC388969         | 388969        |
| 225014_at    | hypothetical gene supported by BC032431                                                 | LOC389203         | 389203        |
| 224890_s_at  | similar to CG14977-PA                                                                   | LOC389541         | 389541        |

|              |                                                                                     |           |              |
|--------------|-------------------------------------------------------------------------------------|-----------|--------------|
| 225046_at    | Hypothetical gene supported by AL713796                                             | LOC389831 | 100132181    |
| 225062_at    | hypothetical gene supported by AL713796                                             | LOC389831 | 100132181    |
| 244631_at    | hypothetical gene supported by AK123403 /// hypothetical LOC642398 /// hypc         | LOC389834 | LOC389834    |
| 216342_x_at  | similar to 40S ribosomal protein S4, X isoform                                      | LOC390183 | LOC100128140 |
| 200869_at    | ribosomal protein L18a /// similar to ribosomal protein L18a; 60S ribosomal pro     | LOC390354 | RPL390354    |
| 222297_x_at  | similar to ribosomal protein L18                                                    | LOC390612 | 390612       |
| 1558075_at   | LOC399491 protein                                                                   | LOC399491 | 339047       |
| 214682_at    | LOC399491 protein                                                                   | LOC399491 | 399491       |
| 200063_s_at  | nucleophosmin (nucleolar phosphoprotein B23, numatrin) /// similar to nucleop       | LOC399804 | NPI4869      |
| 228541_x_at  | hypothetical gene supported by AK098314                                             | LOC400446 | ---          |
| 236001_at    | hypothetical gene supported by BC015790; BC041634                                   | LOC400573 | 400573       |
| 217506_at    | Hypothetical gene supported by BC041875; BX648984                                   | LOC400642 | 400642       |
| 1561090_at   | hypothetical gene supported by BC042493                                             | LOC400654 | 400654       |
| 1569264_at   | hypothetical gene supported by BC013370; BC034583                                   | LOC400655 | 400655       |
| 226924_at    | hypothetical gene supported by BC036588                                             | LOC400657 | 400657       |
| 232953_at    | hypothetical LOC400723                                                              | LOC400723 | 140849       |
| 1556801_at   | hypothetical gene supported by BC030596                                             | LOC400794 | 400794       |
| 217466_x_at  | ribosomal protein S2 /// hypothetical gene supported by AB082925; BC019021;         | LOC400963 | LOC6187      |
| 232812_at    | hypothetical LOC401052                                                              | LOC401052 | 401052       |
| 1559826_a_at | hypothetical LOC401074                                                              | LOC401074 | 401074       |
| 224605_at    | HCV F-transactivated protein 1                                                      | LOC401152 | 401152       |
| 224604_at    | HCV F-transactivated protein 1                                                      | LOC401152 | 401152       |
| 224602_at    | HCV F-transactivated protein 1                                                      | LOC401152 | 401152       |
| 1559760_at   | hypothetical gene supported by BC036933                                             | LOC401220 | 401220       |
| 226635_at    | Hypothetical gene supported by AK091718                                             | LOC401504 | 401504       |
| 225635_s_at  | Hypothetical gene supported by AK091718                                             | LOC401504 | 401504       |
| 217203_at    | similar to Glutamine synthetase (Glutamate--ammonia ligase) (GS)                    | LOC401708 | 2752         |
| 200034_s_at  | ribosomal protein L6 /// similar to 60S ribosomal protein L6 (TAX-responsive enl    | LOC401725 | LOC6128      |
| 238949_at    | hypothetical gene supported by NM_144726                                            | LOC401805 | 153830       |
| 216348_at    | ribosomal protein S17 /// similar to 40S ribosomal protein S17                      | LOC402057 | RPS442216    |
| 228839_s_at  | hypothetical gene supported by AF064843; AK025716 /// hypothetical LOC6423          | LOC439994 | LOC439994    |
| 227106_at    | similar to RIKEN cDNA 1110012D08                                                    | LOC440104 | 100131058    |
| 240268_at    | hypothetical gene supported by BC037858                                             | LOC440117 | 440117       |
| 244766_at    | PI-3-kinase-related kinase SMG-1 /// hypothetical protein LOC440345 /// PI-3-k      | LOC440345 | LOC23049     |
| 216193_at    | hect domain and RLD 2 pseudogene                                                    | LOC440366 | 440366       |
| 242131_at    | OK/SW-cl.16                                                                         | LOC440552 | 440552       |
| 237563_s_at  | hypothetical LOC440731                                                              | LOC440731 | 440731       |
| 238727_at    | Hypothetical gene supported by BC008048                                             | LOC440934 | ---          |
| 238207_at    | Similar to CG32736-PA                                                               | LOC440957 | 440957       |
| 241510_at    | similar to Phospholipid scramblase 1 (PL scramblase 1) (Ca(2+)-dependent phos)      | LOC440981 | 440981       |
| 230405_at    | hypothetical gene supported by AK128882                                             | LOC441108 | 441108       |
| 1560128_x_at | MRNA; cDNA DKFZp686D10250 (from clone DKFZp686D10250) /// Hypothetical              | LOC441108 | 441108       |
| 232253_at    | Hypothetical gene supported by AK128882                                             | LOC441108 | 441108       |
| 223945_x_at  | retinitis pigmentosa 9 pseudogene                                                   | LOC441212 | 441212       |
| 243009_at    | Hypothetical LOC441242 /// CDNA clone IMAGE:5302136                                 | LOC441242 | 441242       |
| 233399_x_at  | Hypothetical gene supported by AF086559; BC065734                                   | LOC441383 | 286101       |
| 208549_x_at  | prothymosin, alpha (gene sequence 28) /// hypothetical gene supported by BC0        | LOC441454 | LOC326626    |
| 1558688_at   | hypothetical gene supported by BC030123                                             | LOC441461 | 441461       |
| 217107_at    | similar to 40S ribosomal protein S4, Y isoform 2                                    | LOC442257 | ---          |
| 234954_at    | similar to Glyceraldehyde-3-phosphate dehydrogenase (GAPDH)                         | LOC442262 | LOC---       |
| 226977_at    | similar to bovine IgA regulatory protein                                            | LOC492311 | 492311       |
| 227628_at    | similar to RIKEN cDNA 2310016C16                                                    | LOC493869 | 493869       |
| 201871_s_at  | SAPK substrate protein 1                                                            | LOC51035  | 51035        |
| 231770_x_at  | hypothetical protein LOC51057                                                       | LOC51057  | 51057        |
| 220771_at    | melanoma antigen                                                                    | LOC51152  | 51152        |
| 225029_at    | hypothetical protein LOC550643                                                      | LOC550643 | 550643       |
| 225028_at    | hypothetical protein LOC550643                                                      | LOC550643 | 550643       |
| 1554447_at   | hypothetical LOC554203                                                              | LOC554203 | 554203       |
| 226006_at    | hypothetical gene LOC554363                                                         | LOC554363 | 100131801    |
| 225509_at    | hypothetical protein LOC56757                                                       | LOC56757  | 79685        |
| 231024_at    | hypothetical locus LOC572558                                                        | LOC572558 | 572558       |
| 237745_at    | hypothetical LOC641467                                                              | LOC641467 | 641467       |
| 1554996_at   | zinc finger protein 479 /// similar to Zinc finger protein 479 (Zinc finger protein | LOC641717 | LOC100134769 |



|              |                                                                                        |                                |             |
|--------------|----------------------------------------------------------------------------------------|--------------------------------|-------------|
| 241646_s_at  | hypothetical protein LOC641748 /// hypothetical LOC646579                              | LOC641748 /// LOC 55973        |             |
| 224751_at    | hypothetical protein LOC641845 /// hypothetical LOC647087                              | LOC641845 /// LOC 647087       |             |
| 215160_x_at  | similar to FRG1 protein (FSHD region gene 1 protein)                                   | LOC642236                      | 642236      |
| 242135_at    | similar to FRG1 protein (FSHD region gene 1 protein)                                   | LOC642236 /// LOC 642236       |             |
| 1559810_at   | hypothetical LOC642313                                                                 | LOC642313                      | 642313      |
| 242577_at    | hypothetical LOC642398 /// hypothetical protein LOC727834                              | LOC642398 /// LOC ---          |             |
| 229264_at    | hypothetical LOC642441 /// hypothetical protein LOC730256 /// hypothetical pi          | LOC642441 /// LOC 100132999    |             |
| 213878_at    | similar to CG10721-PA                                                                  | LOC642732                      | 79912       |
| 231173_at    | pyridine nucleotide-disulphide oxidoreductase domain 1 /// similar to CG10721-         | LOC642732 /// PYR 79912        |             |
| 243656_at    | hypothetical LOC642852                                                                 | LOC642852                      | 642852      |
| 234655_at    | similar to Arachidonate 15-lipoxygenase (Arachidonate omega-6 lipoxygenase) (          | LOC642959                      | ---         |
| 228412_at    | hypothetical LOC643072                                                                 | LOC643072                      | 643072      |
| 216384_x_at  | similar to prothymosin, alpha (gene sequence 28)                                       | LOC643287                      | 643287      |
| 200773_x_at  | prothymosin, alpha (gene sequence 28) /// similar to prothymosin, alpha (gene          | LOC643287 /// PTL 5757         |             |
| 216515_x_at  | prothymosin, alpha (gene sequence 28) /// similar to prothymosin, alpha (gene          | LOC643287 /// PTL 5757 /// 643 |             |
| 1553618_at   | tripartite motif-containing 43 /// similar to bloodthirsty /// similar to tripartite n | LOC643445 /// LOC 129868 /// t |             |
| 226808_at    | hypothetical protein LOC643641                                                         | LOC643641                      | 643641      |
| 1560833_at   | hypothetical protein LOC643648                                                         | LOC643648                      | 643648      |
| 211720_x_at  | ribosomal protein, large, P0 /// similar to acidic ribosomal phosphoprotein P0         | LOC643779 /// RPL 6175         |             |
| 201033_x_at  | ribosomal protein, large, P0 /// similar to acidic ribosomal phosphoprotein P0         | LOC643779 /// RPL 6175         |             |
| 208856_x_at  | ribosomal protein, large, P0 /// similar to acidic ribosomal phosphoprotein P0         | LOC643779 /// RPL 6175         |             |
| 211972_x_at  | ribosomal protein, large, P0 /// similar to acidic ribosomal phosphoprotein P0         | LOC643779 /// RPL 6175         |             |
| 214167_s_at  | ribosomal protein, large, P0 /// ribosomal protein P0-like /// similar to acidic rib   | LOC643779 /// RPL 220717 /// t |             |
| 227796_at    | zinc finger protein 62 homolog (mouse) /// similar to Zinc finger protein 62 hom       | LOC643836 /// ZFP 92379        |             |
| 1557055_s_at | hypothetical protein LOC643837                                                         | LOC643837                      | 643837      |
| 214355_x_at  | similar to CTAGE family, member 5                                                      | LOC643854                      | 100128553 , |
| 204970_s_at  | v-maf musculoaponeurotic fibrosarcoma oncogene homolog G (avian) /// simila            | LOC644132 /// MA 4097          |             |
| 244655_at    | Hypothetical LOC644192                                                                 | LOC644192                      | 100132798   |
| 1566084_at   | Hypothetical LOC644215                                                                 | LOC644215                      | 644215      |
| 1559822_s_at | Hypothetical LOC644215                                                                 | LOC644215                      | 644215      |
| 1558404_at   | Hypothetical protein LOC644242                                                         | LOC644242                      | 644242      |
| 201874_at    | myelin protein zero-like 1 /// similar to myelin protein zero-like 1 isoform a         | LOC644387 /// MP. 9019         |             |
| 201875_s_at  | myelin protein zero-like 1 /// similar to myelin protein zero-like 1 isoform a         | LOC644387 /// MP. 9019         |             |
| 221235_s_at  | Hypothetical LOC644617                                                                 | LOC644617                      | 644617      |
| 1560207_at   | hypothetical LOC644660                                                                 | LOC644660                      | 644660      |
| 234372_at    | similar to Glyceraldehyde-3-phosphate dehydrogenase (GAPDH) (38 kDa BFA-de             | LOC644728                      | ---         |
| 224424_x_at  | ARP3 actin-related protein 3 homolog B pseudogene                                      | LOC644773                      | 440888      |
| 224426_s_at  | ARP3 actin-related protein 3 homolog B pseudogene                                      | LOC644773                      | 440888      |
| 224425_x_at  | ARP3 actin-related protein 3 homolog B pseudogene                                      | LOC644773 /// LOC 440888       |             |
| 203742_s_at  | thymine-DNA glycosylase /// similar to G/T mismatch-specific thymine DNA glyc          | LOC645233 /// LOC 6996         |             |
| 1555400_at   | PP565                                                                                  | LOC645261                      | 645261      |
| 1560007_at   | hypothetical LOC645984                                                                 | LOC645984                      | 645984      |
| 238715_at    | Hypothetical protein LOC646014                                                         | LOC646014                      | 646014      |
| 1562583_s_at | hypothetical LOC646405                                                                 | LOC646405                      | 646405      |
| 229364_at    | hypothetical protein LOC646870                                                         | LOC646870                      | 646870      |
| 237116_at    | hypothetical LOC646903                                                                 | LOC646903                      | 646903      |
| 217092_x_at  | similar to 60S ribosomal protein L7                                                    | LOC646912                      | 100127893 , |
| 1557828_a_at | hypothetical protein LOC646916                                                         | LOC646916                      | 64417       |
| 1555264_a_at | TTL/TEL fusion protein TTL-T                                                           | LOC646982                      | 646982      |
| 215467_x_at  | hypothetical LOC647070                                                                 | LOC647070                      | 647070      |
| 1561492_at   | hypothetical protein LOC647107                                                         | LOC647107                      | 647107      |
| 226789_at    | similar to embigin homolog                                                             | LOC647121                      | 647121      |
| 231367_s_at  | hypothetical LOC647131                                                                 | LOC647131                      | 647131      |
| 1566079_at   | similar to 40S ribosomal protein S16                                                   | LOC647190                      | 647190      |
| 240365_at    | hypothetical protein LOC647946                                                         | LOC647946                      | 647946      |
| 1560001_at   | Similar to 40S ribosomal protein S3a (V-fos transformation effector protein)           | LOC649314                      | 100131581   |
| 200641_s_at  | tyrosine 3-monooxygenase/tryptophan 5-monooxygenase activation protein, ze             | LOC650083 /// YW 7534          |             |
| 200640_at    | tyrosine 3-monooxygenase/tryptophan 5-monooxygenase activation protein, ze             | LOC650083 /// YW 7534          |             |
| 200639_s_at  | tyrosine 3-monooxygenase/tryptophan 5-monooxygenase activation protein, ze             | LOC650083 /// YW 7534          |             |
| 200638_s_at  | tyrosine 3-monooxygenase/tryptophan 5-monooxygenase activation protein, ze             | LOC650083 /// YW 7534          |             |
| 1569872_a_at | Full-length cDNA clone CS0DF015YK23 of Fetal brain of Homo sapiens (human) ,           | LOC650392                      | 650392      |
| 236837_x_at  | Similar to FRAS1-related extracellular matrix protein 2 precursor (ECM3 homolo         | LOC650794                      | 650794      |
| 243760_at    | similar to FRAS1-related extracellular matrix protein 2 precursor (ECM3 homolo,        | LOC650794                      | 650794      |

|              |                                                                                         |           |                      |
|--------------|-----------------------------------------------------------------------------------------|-----------|----------------------|
| 244042_x_at  | Similar to retinoic acid receptor responder (tazarotene induced) 2                      | LOC651466 | ---                  |
| 231658_x_at  | similar to ribosomal protein L36                                                        | LOC651600 | ---                  |
| 229540_at    | recombination signal binding protein for immunoglobulin kappa J region /// sim          | LOC652675 | /// RBF 3516         |
| 201252_at    | proteasome (prosome, macropain) 26S subunit, ATPase, 4 /// similar to 26S pro           | LOC652826 | /// PSA 5704         |
| 233528_s_at  | hypothetical protein LOC652968                                                          | LOC652968 | 652968 /// 8         |
| 226613_at    | hypothetical protein LOC652968                                                          | LOC652968 | 652968 /// 8         |
| 226558_at    | similar to CG32820-PA, isoform A                                                        | LOC653071 | 653071               |
| 209403_at    | TBC1 domain family, member 3 /// TBC1 domain family, member 3C /// similar              | LOC653380 | /// LOC 414059 /// 4 |
| 216902_s_at  | RRN3 RNA polymerase I transcription factor homolog (S. cerevisiae) /// RRN3 RN          | LOC653390 | /// LOC 54700 /// 65 |
| 218338_at    | polyhomeotic homolog 1 (Drosophila) /// similar to polyhomeotic 1-like                  | LOC653441 | /// PHC 1911 /// 65  |
| 225955_at    | meteorin, glial cell differentiation regulator-like /// similar to meteorin, glial cell | LOC653506 | /// ME 284207 /// 6  |
| 201239_s_at  | signal peptidase complex subunit 2 homolog (S. cerevisiae) /// signal peptidase         | LOC653566 | /// SPC 653566 /// 9 |
| 1561894_at   | hypothetical protein LOC653739                                                          | LOC653739 | 653739               |
| 1553432_s_at | otoancorin /// otoancorin pseudogene                                                    | LOC653786 | /// OTC 146183       |
| 238990_x_at  | similar to ring finger protein 129                                                      | LOC653794 | 391712               |
| 205060_at    | poly (ADP-ribose) glycohydrolase /// similar to poly (ADP-ribose) glycohydrolase        | LOC727726 | /// PAF 8505         |
| 201384_s_at  | neighbor of BRCA1 gene 1 /// similar to neighbor of BRCA1 gene 1                        | LOC727732 | /// NBI 100133166 ,  |
| 212280_x_at  | similar to APG4 autophagy 4 homolog B isoform a                                         | LOC727737 | 23192 /// 7          |
| 240814_at    | hypothetical gene supported by BC029568 /// hypothetical protein LOC727739              | LOC727739 | /// MG 441058        |
| 218226_s_at  | NADH dehydrogenase (ubiquinone) 1 beta subcomplex, 4, 15kDa /// similar to N            | LOC727762 | /// NDI 4710 /// 72  |
| 227384_s_at  | hypothetical protein LOC727820                                                          | LOC727820 | 727820               |
| 1558093_s_at | matrin 3 /// similar to Matrin-3 (Nuclear scaffold protein P130/MAT3)                   | LOC727839 | /// MA 9782          |
| 200624_s_at  | matrin 3 /// similar to Matrin-3 (Nuclear scaffold protein P130/MAT3)                   | LOC727839 | /// MA 9782          |
| 216469_at    | similar to zinc finger protein 43 (HTF6)                                                | LOC727867 | 441955 /// 7         |
| 1564856_s_at | hypothetical protein LOC727924                                                          | LOC727924 | 283694 /// 7         |
| 1561437_at   | Hypothetical gene LOC728012                                                             | LOC728012 | ---                  |
| 1561221_x_at | hypothetical protein LOC728099                                                          | LOC728099 | 728099               |
| 243485_at    | hypothetical protein LOC728173                                                          | LOC728173 | 728173               |
| 230543_at    | hypothetical protein LOC728177                                                          | LOC728177 | ---                  |
| 1558794_at   | Hypothetical protein LOC728190                                                          | LOC728190 | 728190               |
| 229609_at    | hypothetical protein LOC728190                                                          | LOC728190 | 728190               |
| 1562625_at   | Hypothetical protein LOC728298                                                          | LOC728298 | 285527               |
| 202018_s_at  | lactotransferrin /// similar to lactotransferrin                                        | LOC728320 | /// LTF 4057         |
| 213605_s_at  | Similar to Beta-glucuronidase precursor                                                 | LOC728411 | 100134401            |
| 1558640_a_at | Similar to Beta-glucuronidase precursor                                                 | LOC728411 | 100132788            |
| 230653_at    | hypothetical protein LOC728555 /// hypothetical protein LOC730391                       | LOC728555 | /// LOC 100132218 ,  |
| 242491_at    | hypothetical protein LOC728555 /// hypothetical protein LOC730391                       | LOC728555 | /// LOC 100132218 ,  |
| 217122_s_at  | solute carrier family 35, member E2 /// similar to solute carrier family 35, mem        | LOC728661 | /// SLC 728661 /// 9 |
| 234562_x_at  | hypothetical protein LOC728678 /// hypothetical protein LOC731914                       | LOC728678 | /// LOC 728678       |
| 228245_s_at  | ovostatin 2 /// similar to cDNA sequence BC048546                                       | LOC728715 | /// OV 100132881 ,   |
| 1564475_s_at | hypothetical protein LOC728723                                                          | LOC728723 | 728723               |
| 1564474_at   | hypothetical protein LOC728723                                                          | LOC728723 | 728723               |
| 242313_at    | Hypothetical protein LOC728730                                                          | LOC728730 | 728730               |
| 228884_at    | similar to leucine rich repeat containing 27                                            | LOC728799 | 728799 /// 8         |
| 224899_s_at  | implantation-associated protein /// similar to implantation-associated protein          | LOC728866 | /// RP1 728866 /// 8 |
| 221553_at    | implantation-associated protein /// similar to implantation-associated protein          | LOC728866 | /// RP1 728866 /// 8 |
| 228040_at    | family with sequence similarity 88, member B /// hypothetical protein LOC7289           | LOC728903 | /// RP1 389741       |
| 227709_at    | Similar to Reticulocalbin-1 precursor /// Pp13759                                       | LOC728913 | ---                  |
| 227710_s_at  | Similar to Reticulocalbin-1 precursor /// Pp13759                                       | LOC728913 | ---                  |
| 227092_at    | hypothetical protein LOC728928                                                          | LOC728928 | ---                  |
| 226740_x_at  | neuroblastoma breakpoint family, member 14 /// neuroblastoma breakpoint fa              | LOC728980 | /// LOC 100132406 ,  |
| 201103_x_at  | neuroblastoma breakpoint family, member 11 /// neuroblastoma breakpoint fa              | LOC728980 | /// NBI 100132406 ,  |
| 213612_x_at  | neuroblastoma breakpoint family, member 15 /// neuroblastoma breakpoint fa              | LOC728980 | /// NBI 100132406 ,  |
| 235010_at    | hypothetical protein LOC729013                                                          | LOC729013 | 729013               |
| 237028_at    | hypothetical protein LOC729124                                                          | LOC729124 | 729124               |
| 59433_at     | hypothetical protein LOC729137                                                          | LOC729137 | 286434 /// 8         |
| 203837_at    | mitogen-activated protein kinase kinase kinase 5 /// hypothetical protein LOC72         | LOC729144 | /// MA 4217          |
| 214375_at    | PTPRF interacting protein, binding protein 1 (liprin beta 1) /// similar to PTPRF i     | LOC729222 | /// PPF 729222 /// 8 |
| 220167_s_at  | TP53TG3 protein /// similar to TP53TG3 protein                                          | LOC729264 | /// LOC 24150 /// 7  |
| 227866_at    | Hypothetical protein LOC729436                                                          | LOC729436 | 729436               |
| 227837_at    | Hypothetical protein LOC729570                                                          | LOC729570 | 729570               |
| 78047_s_at   | hypothetical protein LOC729580                                                          | LOC729580 | 729580               |
| 225860_at    | hypothetical protein LOC729580                                                          | LOC729580 | 729580               |

|              |                                                                                     |                   |              |
|--------------|-------------------------------------------------------------------------------------|-------------------|--------------|
| 1556180_at   | hypothetical protein LOC729678                                                      | LOC729678         | 729678       |
| 236614_at    | hypothetical protein LOC729683                                                      | LOC729683         | 729683       |
| 240436_at    | Hypothetical protein LOC729697                                                      | LOC729697         | 650794       |
| 217544_at    | similar to Zinc finger protein 492                                                  | LOC729806         | 729806       |
| 236692_at    | similar to DTW domain containing 2                                                  | LOC729839         | 729839       |
| 242539_at    | nuclear receptor binding factor 2 pseudogene /// similar to nuclear receptor bin    | LOC730069 /// LOC | 731484       |
| 216908_x_at  | RRN3 RNA polymerase I transcription factor homolog (S. cerevisiae) pseudogene       | LOC730092         | 730092       |
| 215211_at    | RRN3 RNA polymerase I transcription factor homolog (S. cerevisiae) pseudogene       | LOC730092         | ---          |
| 1561571_at   | hypothetical protein LOC730139                                                      | LOC730139         | 730139       |
| 241053_at    | hypothetical protein LOC730184                                                      | LOC730184         | 730184       |
| 240287_at    | similar to Immune-responsive protein 1                                              | LOC730249         | 730249       |
| 230712_at    | neuroblastoma breakpoint family, member 1 /// neuroblastoma breakpoint fam          | LOC730258 /// NBI | 100132406 ,  |
| 215599_at    | glucuronidase, beta pseudogene /// similar to SMA4                                  | LOC730390 /// SM, | 11039        |
| 217436_x_at  | hypothetical protein LOC730399 /// hypothetical protein LOC731974                   | LOC730399 /// LOC | 3105 /// 310 |
| 235142_at    | zinc finger and BTB domain containing 8 /// similar to zinc finger and BTB domai    | LOC730411 /// ZBT | 653121 /// 7 |
| 235180_at    | serine/threonine/tyrosine interacting protein /// similar to serine/threonine/tyr   | LOC730432 /// STY | 6815 /// 730 |
| 242408_at    | serine/threonine/tyrosine interacting protein /// similar to serine/threonine/tyr   | LOC730432 /// STY | 6815 /// 730 |
| 230959_at    | hypothetical protein LOC730453                                                      | LOC730453         | ---          |
| 215441_at    | hypothetical protein LOC730453                                                      | LOC730453         | ---          |
| 207922_s_at  | macrophage erythroblast attacher /// similar to macrophage erythroblast attac       | LOC730744 /// MA  | 10296        |
| 217492_s_at  | phosphatase and tensin homolog (mutated in multiple advanced cancers 1) ///         | LOC731292 /// PTE | 11191 /// 5; |
| 223988_x_at  | methyltransferase 11 domain containing 1 /// similar to methyltransferase 11 d      | LOC731602 /// ME  | 64745 /// 7; |
| 217520_x_at  | Similar to programmed cell death 6 interacting protein                              | LOC731884         | 731884       |
| 208137_x_at  | zinc finger protein 137 /// zinc finger protein 611 /// zinc finger protein 600 /// | LOC731901 /// ZNF | 81856        |
| 239316_at    | hypothetical protein LOC751071                                                      | LOC751071         | 751071       |
| 1560081_at   | hypothetical protein LOC90408                                                       | LOC90408          | 90408        |
| 234341_x_at  | hypothetical protein LOC91548                                                       | LOC91548          | 91548        |
| 213220_at    | hypothetical protein LOC92482                                                       | LOC92482          | 92482        |
| 233198_at    | hypothetical protein LOC92497                                                       | LOC92497          | 92497        |
| 214791_at    | hypothetical protein BC004921                                                       | LOC93349          | 93349        |
| 225391_at    | hypothetical protein BC006130                                                       | LOC93622          | 93622        |
| 1569013_s_at | hypothetical gene LOC96610                                                          | LOC96610          | 642311 /// 9 |
| 226802_s_at  | hypothetical gene LOC96610                                                          | LOC96610          | 96610        |
| 220244_at    | loss of heterozygosity, 3, chromosomal region 2, gene A                             | LOH3CR2A          | 29931        |
| 209017_s_at  | lon peptidase 1, mitochondrial                                                      | LONP1             | 9361         |
| 221834_at    | Lon peptidase 2, peroxisomal                                                        | LONP2             | 83752        |
| 226038_at    | LON peptidase N-terminal domain and ring finger 1                                   | LONRF1            | 91694        |
| 215446_s_at  | lysyl oxidase                                                                       | LOX               | 4015         |
| 202651_at    | lysophosphatidylglycerol acyltransferase 1                                          | LPGAT1            | 9926         |
| 1555058_a_at | lysophosphatidylglycerol acyltransferase 1                                          | LPGAT1            | 9926         |
| 209866_s_at  | latrophilin 3                                                                       | LPHN3             | 23284        |
| 212274_at    | lipin 1                                                                             | LPIN1             | 23175        |
| 202459_s_at  | lipin 2                                                                             | LPIN2             | 9663         |
| 202460_s_at  | lipin 2                                                                             | LPIN2             | 9663         |
| 202821_s_at  | LIM domain containing preferred translocation partner in lipoma                     | LPP               | 4026         |
| 213496_at    | plasticity related gene 1                                                           | LPPR4             | 9890         |
| 216250_s_at  | leupaxin                                                                            | LPXN              | 9404         |
| 212692_s_at  | LPS-responsive vesicle trafficking, beach and anchor containing                     | LRBA              | 987          |
| 214109_at    | LPS-responsive vesicle trafficking, beach and anchor containing                     | LRBA              | 987          |
| 235012_at    | leucine-rich repeats and calponin homology (CH) domain containing 1                 | LRCH1             | 23143        |
| 231861_at    | low density lipoprotein receptor-related protein 10                                 | LRP10             | 26020        |
| 219631_at    | low density lipoprotein-related protein 12                                          | LRP12             | 29967        |
| 214873_at    | low density lipoprotein receptor-related protein 5-like                             | LRP5L             | 91355        |
| 225745_at    | low density lipoprotein receptor-related protein 6                                  | LRP6              | 4040         |
| 201186_at    | low density lipoprotein receptor-related protein associated protein 1               | LRPAP1            | 4043         |
| 211971_s_at  | leucine-rich PPR-motif containing                                                   | LRPPRC            | 10128        |
| 207790_at    | leucine rich repeat containing 1                                                    | LRRC1             | 55227        |
| 239471_at    | leucine rich repeat containing 28                                                   | LRRC28            | 123355       |
| 227423_at    | leucine rich repeat containing 28                                                   | LRRC28            | 123355       |
| 221740_x_at  | Leucine rich repeat containing 37, member A2 /// CDNA clone IMAGE:4902949           | LRRC37A2          | 474170       |
| 206088_at    | leucine rich repeat containing 37, member A2                                        | LRRC37A2          | 474170 /// 9 |
| 244478_at    | Leucine rich repeat containing 37, member A3                                        | LRRC37A3          | 374819       |
| 1559580_at   | leucine rich repeat containing 39                                                   | LRRC39            | 127495       |

|              |                                                                         |                |        |
|--------------|-------------------------------------------------------------------------|----------------|--------|
| 229085_at    | leucine rich repeat containing 3B                                       | <i>LRRC3B</i>  | 116135 |
| 223552_at    | leucine rich repeat containing 4                                        | <i>LRRC4</i>   | 64101  |
| 218577_at    | leucine rich repeat containing 40                                       | <i>LRRC40</i>  | 55631  |
| 215084_s_at  | leucine rich repeat containing 42                                       | <i>LRRC42</i>  | 115353 |
| 235498_at    | leucine rich repeat containing 44                                       | <i>LRRC44</i>  | 127255 |
| 1553674_at   | leucine rich repeat containing 44                                       | <i>LRRC44</i>  | 127255 |
| 222068_s_at  | leucine rich repeat containing 50                                       | <i>LRRC50</i>  | 123872 |
| 229232_at    | leucine rich repeat containing 57                                       | <i>LRRC57</i>  | 255252 |
| 238506_at    | leucine rich repeat containing 58                                       | <i>LRRC58</i>  | 116064 |
| 233499_at    | leucine rich repeat containing 7                                        | <i>LRRC7</i>   | 57554  |
| 1558517_s_at | leucine rich repeat containing 8 family, member C                       | <i>LRRC8C</i>  | 84230  |
| 228314_at    | leucine rich repeat containing 8 family, member C                       | <i>LRRC8C</i>  | 84230  |
| 223533_at    | leucine rich repeat containing 8 family, member C                       | <i>LRRC8C</i>  | 84230  |
| 1570007_at   | leucine rich repeat containing 8 family, member C                       | <i>LRRC8C</i>  | 84230  |
| 218684_at    | leucine rich repeat containing 8 family, member D                       | <i>LRRC8D</i>  | 55144  |
| 223492_s_at  | leucine rich repeat (in FLII) interacting protein 1                     | <i>LRRFIP1</i> | 9208   |
| 220610_s_at  | leucine rich repeat (in FLII) interacting protein 2                     | <i>LRRFIP2</i> | 9209   |
| 219441_s_at  | leucine-rich repeat kinase 1                                            | <i>LRRK1</i>   | 79705  |
| 229584_at    | leucine-rich repeat kinase 2                                            | <i>LRRK2</i>   | 120892 |
| 206408_at    | leucine rich repeat transmembrane neuronal 2                            | <i>LRRTM2</i>  | 26045  |
| 221535_at    | large subunit GTPase 1 homolog (S. cerevisiae)                          | <i>LSG1</i>    | 55341  |
| 221536_s_at  | large subunit GTPase 1 homolog (S. cerevisiae)                          | <i>LSG1</i>    | 55341  |
| 212529_at    | LSM12 homolog (S. cerevisiae)                                           | <i>LSM12</i>   | 124801 |
| 212532_s_at  | LSM12 homolog (S. cerevisiae)                                           | <i>LSM12</i>   | 124801 |
| 212132_at    | LSM14A, SCD6 homolog A (S. cerevisiae)                                  | <i>LSM14A</i>  | 26065  |
| 219653_at    | LSM14B, SCD6 homolog B (S. cerevisiae)                                  | <i>LSM14B</i>  | 149986 |
| 211747_s_at  | LSM5 homolog, U6 small nuclear RNA associated (S. cerevisiae)           | <i>LSM5</i>    | 23658  |
| 203523_at    | lymphocyte-specific protein 1                                           | <i>LSP1</i>    | 4046   |
| 202245_at    | lanosterol synthase (2,3-oxidosqualene-lanosterol cyclase)              | <i>LSS</i>     | 4047   |
| 204682_at    | latent transforming growth factor beta binding protein 2                | <i>LTBP2</i>   | 4053   |
| 226758_at    | LUC7-like 2 (S. cerevisiae)                                             | <i>LUC7L2</i>  | 51631  |
| 218729_at    | latexin                                                                 | <i>LXN</i>     | 56925  |
| 202145_at    | lymphocyte antigen 6 complex, locus E                                   | <i>LY6E</i>    | 4061   |
| 205668_at    | lymphocyte antigen 75                                                   | <i>LY75</i>    | 4065   |
| 206584_at    | lymphocyte antigen 96                                                   | <i>LY96</i>    | 23643  |
| 223414_s_at  | Ly1 antibody reactive homolog (mouse)                                   | <i>LYAR</i>    | 55646  |
| 226996_at    | lysocardiolipin acyltransferase                                         | <i>LYCAT</i>   | 253558 |
| 202626_s_at  | v-yes-1 Yamaguchi sarcoma viral related oncogene homolog                | <i>LYN</i>     | 4067   |
| 210754_s_at  | v-yes-1 Yamaguchi sarcoma viral related oncogene homolog                | <i>LYN</i>     | 4067   |
| 202625_at    | v-yes-1 Yamaguchi sarcoma viral related oncogene homolog                | <i>LYN</i>     | 4067   |
| 226851_at    | lysophospholipase-like 1                                                | <i>LYPLAL1</i> | 127018 |
| 239960_x_at  | Lym7 homolog (mouse)                                                    | <i>LYRM7</i>   | 90624  |
| 226321_at    | LysM, putative peptidoglycan-binding, domain containing 3               | <i>LYSMD3</i>  | 116068 |
| 213975_s_at  | lysozyme (renal amyloidosis)                                            | <i>LYZ</i>     | 4069   |
| 226087_at    | leucine zipper and CTNNBIP1 domain containing                           | <i>LZIC</i>    | 84328  |
| 218437_s_at  | leucine zipper transcription factor-like 1                              | <i>LZTFL1</i>  | 54585  |
| 1555881_s_at | leucine zipper, putative tumor suppressor 2                             | <i>LZTS2</i>   | 84445  |
| 200901_s_at  | mannose-6-phosphate receptor (cation dependent)                         | <i>M6PR</i>    | 4074   |
| 200900_s_at  | mannose-6-phosphate receptor (cation dependent)                         | <i>M6PR</i>    | 4074   |
| 208634_s_at  | microtubule-actin crosslinking factor 1                                 | <i>MACF1</i>   | 23499  |
| 1553564_at   | MACRO domain containing 2                                               | <i>MACROD2</i> | 140733 |
| 203362_s_at  | MAD2 mitotic arrest deficient-like 1 (yeast)                            | <i>MAD2L1</i>  | 4085   |
| 208037_s_at  | mucosal vascular addressin cell adhesion molecule 1                     | <i>MADCAM1</i> | 8174   |
| 209348_s_at  | v-maf musculoaponeurotic fibrosarcoma oncogene homolog (avian)          | <i>MAF</i>     | 4094   |
| 222998_at    | MAF1 homolog (S. cerevisiae)                                            | <i>MAF1</i>    | 84232  |
| 205193_at    | v-maf musculoaponeurotic fibrosarcoma oncogene homolog F (avian)        | <i>MAFF</i>    | 23764  |
| 36711_at     | v-maf musculoaponeurotic fibrosarcoma oncogene homolog F (avian)        | <i>MAFF</i>    | 23764  |
| 226206_at    | v-maf musculoaponeurotic fibrosarcoma oncogene homolog K (avian)        | <i>MAFK</i>    | 7975   |
| 206218_at    | melanoma antigen family B, 2                                            | <i>MAGEB2</i>  | 4113   |
| 206144_at    | membrane associated guanylate kinase, WW and PDZ domain containing 1    | <i>MAGI1</i>   | 9223   |
| 209737_at    | membrane associated guanylate kinase, WW and PDZ domain containing 2    | <i>MAGI2</i>   | 9863   |
| 220302_at    | male germ cell-associated kinase                                        | <i>MAK</i>     | 4117   |
| 1558678_s_at | metastasis associated lung adenocarcinoma transcript 1 (non-coding RNA) | <i>MALAT1</i>  | 378938 |

|              |                                                                              |                  |        |
|--------------|------------------------------------------------------------------------------|------------------|--------|
| 224567_x_at  | metastasis associated lung adenocarcinoma transcript 1 (non-coding RNA)      | <i>MALAT1</i>    | 378938 |
| 223940_x_at  | metastasis associated lung adenocarcinoma transcript 1 (non-coding RNA)      | <i>MALAT1</i>    | 378938 |
| 226675_s_at  | metastasis associated lung adenocarcinoma transcript 1 (non-coding RNA)      | <i>MALAT1</i>    | 378938 |
| 224559_at    | metastasis associated lung adenocarcinoma transcript 1 (non-coding RNA)      | <i>MALAT1</i>    | 378938 |
| 208309_s_at  | mucosa associated lymphoid tissue lymphoma translocation gene 1              | <i>MALT1</i>     | 10892  |
| 210018_x_at  | mucosa associated lymphoid tissue lymphoma translocation gene 1              | <i>MALT1</i>     | 10892  |
| 228885_at    | MAM domain containing 2                                                      | <i>MAMDC2</i>    | 256691 |
| 202360_at    | mastermind-like 1 (Drosophila)                                               | <i>MAML1</i>     | 9794   |
| 242794_at    | mastermind-like 3 (Drosophila)                                               | <i>MAML3</i>     | 55534  |
| 217922_at    | mannosidase, alpha, class 1A, member 2                                       | <i>MAN1A2</i>    | ---    |
| 217920_at    | mannosidase, alpha, class 1A, member 2                                       | <i>MAN1A2</i>    | 10905  |
| 217282_at    | mannosidase, alpha, class 1A, member 2                                       | <i>MAN1A2</i>    | 10905  |
| 217921_at    | mannosidase, alpha, class 1A, member 2                                       | <i>MAN1A2</i>    | 10905  |
| 205105_at    | mannosidase, alpha, class 2A, member 1                                       | <i>MAN2A1</i>    | 4124   |
| 226538_at    | Mannosidase, alpha, class 2A, member 1                                       | <i>MAN2A1</i>    | 4124   |
| 235103_at    | Mannosidase, alpha, class 2A, member 1                                       | <i>MAN2A1</i>    | 4124   |
| 219999_at    | mannosidase, alpha, class 2A, member 2                                       | <i>MAN2A2</i>    | 4122   |
| 202032_s_at  | mannosidase, alpha, class 2A, member 2                                       | <i>MAN2A2</i>    | 4122   |
| 214703_s_at  | mannosidase, alpha, class 2B, member 2                                       | <i>MAN2B2</i>    | 23324  |
| 222805_at    | mannosidase, endo-alpha                                                      | <i>MANEA</i>     | 79694  |
| 220945_x_at  | MANSC domain containing 1                                                    | <i>MANSC1</i>    | 54682  |
| 226084_at    | microtubule-associated protein 1B                                            | <i>MAP1B</i>     | 4131   |
| 208786_s_at  | microtubule-associated protein 1 light chain 3 beta                          | <i>MAP1LC3B</i>  | 81631  |
| 208785_s_at  | microtubule-associated protein 1 light chain 3 beta                          | <i>MAP1LC3B</i>  | 81631  |
| 218522_s_at  | microtubule-associated protein 1S                                            | <i>MAP1S</i>     | 55201  |
| 210015_s_at  | microtubule-associated protein 2                                             | <i>MAP2</i>      | 4133   |
| 202670_at    | mitogen-activated protein kinase kinase 1                                    | <i>MAP2K1</i>    | 5604   |
| 217971_at    | mitogen-activated protein kinase kinase 1 interacting protein 1              | <i>MAP2K1IP1</i> | 8649   |
| 202424_at    | mitogen-activated protein kinase kinase 2                                    | <i>MAP2K2</i>    | 5605   |
| 207667_s_at  | mitogen-activated protein kinase kinase 3                                    | <i>MAP2K3</i>    | 5606   |
| 215498_s_at  | mitogen-activated protein kinase kinase 3                                    | <i>MAP2K3</i>    | 5606   |
| 203265_s_at  | mitogen-activated protein kinase kinase 4                                    | <i>MAP2K4</i>    | 6416   |
| 214786_at    | mitogen-activated protein kinase kinase kinase 1                             | <i>MAP3K1</i>    | 4214   |
| 205192_at    | mitogen-activated protein kinase kinase kinase 14                            | <i>MAP3K14</i>   | 9020   |
| 235011_at    | mitogen-activated protein kinase kinase kinase 2                             | <i>MAP3K2</i>    | 10746  |
| 227073_at    | mitogen-activated protein kinase kinase kinase 2                             | <i>MAP3K2</i>    | ---    |
| 226979_at    | mitogen-activated protein kinase kinase kinase 2                             | <i>MAP3K2</i>    | 10746  |
| 221695_s_at  | mitogen-activated protein kinase kinase kinase 2                             | <i>MAP3K2</i>    | 10746  |
| 227131_at    | mitogen-activated protein kinase kinase kinase 3                             | <i>MAP3K3</i>    | 4215   |
| 203514_at    | mitogen-activated protein kinase kinase kinase 3                             | <i>MAP3K3</i>    | 4215   |
| 203836_s_at  | mitogen-activated protein kinase kinase kinase 5                             | <i>MAP3K5</i>    | 4217   |
| 210284_s_at  | mitogen-activated protein kinase kinase kinase 7 interacting protein 2       | <i>MAP3K7IP2</i> | 23118  |
| 212184_s_at  | mitogen-activated protein kinase kinase kinase 7 interacting protein 2       | <i>MAP3K7IP2</i> | 23118  |
| 205027_s_at  | mitogen-activated protein kinase kinase kinase 8                             | <i>MAP3K8</i>    | 1326   |
| 235421_at    | Mitogen-activated protein kinase kinase kinase 8 /// CDNA clone IMAGE:468948 | <i>MAP3K8</i>    | 1326   |
| 212566_at    | microtubule-associated protein 4                                             | <i>MAP4</i>      | 4134   |
| 214339_s_at  | mitogen-activated protein kinase kinase kinase kinase 1                      | <i>MAP4K1</i>    | 11184  |
| 222548_s_at  | mitogen-activated protein kinase kinase kinase kinase 4                      | <i>MAP4K4</i>    | 9448   |
| 206571_s_at  | mitogen-activated protein kinase kinase kinase kinase 4                      | <i>MAP4K4</i>    | 9448   |
| 222547_at    | mitogen-activated protein kinase kinase kinase kinase 4                      | <i>MAP4K4</i>    | 9448   |
| 218181_s_at  | mitogen-activated protein kinase kinase kinase kinase 4                      | <i>MAP4K4</i>    | 9448   |
| 202890_at    | microtubule-associated protein 7                                             | <i>MAP7</i>      | 9053   |
| 217943_s_at  | MAP7 domain containing 1                                                     | <i>MAP7D1</i>    | 55700  |
| 218291_at    | mitogen-activated protein-binding protein-interacting protein                | <i>MAPBP1P</i>   | 28956  |
| 207121_s_at  | mitogen-activated protein kinase 6                                           | <i>MAPK6</i>     | 5597   |
| 35617_at     | mitogen-activated protein kinase 7                                           | <i>MAPK7</i>     | 5598   |
| 207292_s_at  | mitogen-activated protein kinase 7                                           | <i>MAPK7</i>     | 5598   |
| 229664_at    | mitogen-activated protein kinase 8                                           | <i>MAPK8</i>     | 5599   |
| 202788_at    | mitogen-activated protein kinase-activated protein kinase 3                  | <i>MAPKAPK3</i>  | 7867   |
| 1561937_x_at | Mitogen-activated protein kinase-activated protein kinase 5                  | <i>MAPKAPK5</i>  | 3500   |
| 225897_at    | myristoylated alanine-rich protein kinase C substrate                        | <i>MARCKS</i>    | 4082   |
| 201668_x_at  | myristoylated alanine-rich protein kinase C substrate                        | <i>MARCKS</i>    | 4082   |
| 201670_s_at  | myristoylated alanine-rich protein kinase C substrate                        | <i>MARCKS</i>    | 4082   |

|              |                                                                             |          |            |
|--------------|-----------------------------------------------------------------------------|----------|------------|
| 231613_at    | MAP/microtubule affinity-regulating kinase 1                                | MARK1    | 4139       |
| 226653_at    | MAP/microtubule affinity-regulating kinase 1                                | MARK1    | 4139       |
| 202568_s_at  | MAP/microtubule affinity-regulating kinase 3                                | MARK3    | 4140       |
| 55065_at     | MAP/microtubule affinity-regulating kinase 4                                | MARK4    | 57787      |
| 213672_at    | methionyl-tRNA synthetase                                                   | MARS     | 4141       |
| 207041_at    | mannan-binding lectin serine peptidase 2                                    | MASP2    | 10747      |
| 225613_at    | microtubule associated serine/threonine kinase family member 4              | MAST4    | 100128443, |
| 200768_s_at  | methionine adenosyltransferase II, alpha                                    | MAT2A    | 4144       |
| 206267_s_at  | megakaryocyte-associated tyrosine kinase                                    | MATK     | 4145       |
| 208403_x_at  | MYC associated factor X                                                     | MAX      | 4149       |
| 203353_s_at  | methyl-CpG binding domain protein 1                                         | MBD1     | 4152       |
| 241813_at    | methyl-CpG binding domain protein 1                                         | MBD1     | 4152       |
| 208595_s_at  | methyl-CpG binding domain protein 1                                         | MBD1     | 4152       |
| 202484_s_at  | methyl-CpG binding domain protein 2                                         | MBD2     | 8932       |
| 227833_s_at  | methyl-CpG binding domain protein 6                                         | MBD6     | 114785     |
| 226076_s_at  | methyl-CpG binding domain protein 6                                         | MBD6     | 114785     |
| 1555594_a_at | muscleblind-like (Drosophila)                                               | MBNL1    | 4154       |
| 201152_s_at  | muscleblind-like (Drosophila)                                               | MBNL1    | 4154       |
| 232138_at    | Muscleblind-like 2 (Drosophila)                                             | MBNL2    | 10150      |
| 227379_at    | membrane bound O-acyltransferase domain containing 1                        | MBOAT1   | 154141     |
| 213288_at    | membrane bound O-acyltransferase domain containing 2                        | MBOAT2   | 129642     |
| 226726_at    | membrane bound O-acyltransferase domain containing 2                        | MBOAT2   | 129642     |
| 225408_at    | myelin basic protein                                                        | MBP      | 4155       |
| 225407_at    | myelin basic protein                                                        | MBP      | 4155       |
| 1554544_a_at | myelin basic protein                                                        | MBP      | 4155       |
| 210136_at    | myelin basic protein                                                        | MBP      | 4155       |
| 221467_at    | melanocortin 4 receptor                                                     | MC4R     | 4160       |
| 232092_at    | mitochondrial carrier triple repeat 1                                       | MCART1   | 92014      |
| 214057_at    | Myeloid cell leukemia sequence 1 (BCL2-related)                             | MCL1     | 4170       |
| 215582_x_at  | minichromosome maintenance complex component 3 associated protein           | MCM3AP   | 8888       |
| 215581_s_at  | minichromosome maintenance complex component 3 associated protein           | MCM3AP   | 8888       |
| 220459_at    | minichromosome maintenance complex component 3 associated protein antisense | MCM3APAS | 114044     |
| 212142_at    | minichromosome maintenance complex component 4                              | MCM4     | 4173       |
| 224320_s_at  | minichromosome maintenance complex component 8                              | MCM8     | 84515      |
| 219673_at    | minichromosome maintenance complex component 9                              | MCM9     | 254394     |
| 219952_s_at  | mucolipin 1                                                                 | MCOLN1   | 57192      |
| 1557292_a_at | mucolipin 3                                                                 | MCOLN3   | 55283      |
| 1554730_at   | multiple C2 domains, transmembrane 1                                        | MCTP1    | 79772      |
| 220603_s_at  | multiple C2 domains, transmembrane 2                                        | MCTP2    | 55784      |
| 211675_s_at  | MyoD family inhibitor domain containing                                     | MDFIC    | 29969      |
| 1559942_at   | MyoD family inhibitor domain containing                                     | MDFIC    | 29969      |
| 235374_at    | Malate dehydrogenase 1, NAD (soluble)                                       | MDH1     | 4190       |
| 213761_at    | Mdm4, transformed 3T3 cell double minute 1, p53 binding protein (mouse)     | MDM1     | 56890      |
| 205386_s_at  | Mdm2, transformed 3T3 cell double minute 2, p53 binding protein (mouse)     | MDM2     | 4193       |
| 225740_x_at  | Mdm4, transformed 3T3 cell double minute 4, p53 binding protein (mouse)     | MDM4     | ---        |
| 236814_at    | Mdm4, transformed 3T3 cell double minute 4, p53 binding protein (mouse)     | MDM4     | 4194       |
| 225742_at    | Mdm4, transformed 3T3 cell double minute 4, p53 binding protein (mouse)     | MDM4     | ---        |
| 205655_at    | Mdm4, transformed 3T3 cell double minute 4, p53 binding protein (mouse)     | MDM4     | 4194       |
| 212693_at    | MDN1, midasin homolog (yeast)                                               | MDN1     | 23195      |
| 204059_s_at  | malic enzyme 1, NADP(+)-dependent, cytosolic                                | ME1      | 4199       |
| 210153_s_at  | malic enzyme 2, NAD(+)-dependent, mitochondrial                             | ME2      | 4200       |
| 209397_at    | malic enzyme 2, NAD(+)-dependent, mitochondrial                             | ME2      | 4200       |
| 210154_at    | malic enzyme 2, NAD(+)-dependent, mitochondrial                             | ME2      | 4200       |
| 218061_at    | male-enhanced antigen 1                                                     | MEA1     | 4201       |
| 202618_s_at  | methyl CpG binding protein 2 (Rett syndrome)                                | MECP2    | 4204       |
| 202617_s_at  | methyl CpG binding protein 2 (Rett syndrome)                                | MECP2    | 4204       |
| 223780_s_at  | mediator complex subunit 13                                                 | MED13    | 9969       |
| 215167_at    | mediator complex subunit 14                                                 | MED14    | 9282       |
| 221517_s_at  | mediator complex subunit 17                                                 | MED17    | 9440       |
| 223946_at    | mediator complex subunit 23                                                 | MED23    | 9439       |
| 242706_s_at  | mediator complex subunit 23                                                 | MED23    | 9439       |
| 1553993_s_at | mediator complex subunit 25                                                 | MED25    | 81857      |
| 227538_at    | mediator complex subunit 26                                                 | MED26    | 9441       |

|              |                                                                                          |                 |              |
|--------------|------------------------------------------------------------------------------------------|-----------------|--------------|
| 228992_at    | Mediator of RNA polymerase II transcription, subunit 28 homolog ( <i>S. cerevisiae</i> ) | <i>MED28</i>    | 80306        |
| 218438_s_at  | mediator complex subunit 28                                                              | <i>MED28</i>    | 80306        |
| 222635_s_at  | mediator complex subunit 28                                                              | <i>MED28</i>    | 80306        |
| 222636_at    | mediator complex subunit 28                                                              | <i>MED28</i>    | 80306        |
| 219318_x_at  | mediator complex subunit 31                                                              | <i>MED31</i>    | 51003        |
| 213696_s_at  | mediator complex subunit 8                                                               | <i>MED8</i>     | 112950       |
| 213126_at    | mediator complex subunit 8                                                               | <i>MED8</i>     | 112950       |
| 218372_at    | mediator complex subunit 9                                                               | <i>MED9</i>     | 55090        |
| 1553978_at   | myocyte enhancer factor 2B                                                               | <i>MEF2B</i>    | 100133072 ,  |
| 209199_s_at  | myocyte enhancer factor 2C                                                               | <i>MEF2C</i>    | 4208         |
| 209200_at    | myocyte enhancer factor 2C                                                               | <i>MEF2C</i>    | 4208         |
| 207968_s_at  | myocyte enhancer factor 2C                                                               | <i>MEF2C</i>    | 4208         |
| 203004_s_at  | myocyte enhancer factor 2D                                                               | <i>MEF2D</i>    | 4209         |
| 225641_at    | myocyte enhancer factor 2D                                                               | <i>MEF2D</i>    | 4209         |
| 203003_at    | myocyte enhancer factor 2D                                                               | <i>MEF2D</i>    | 4209         |
| 212732_at    | maternally expressed 3                                                                   | <i>MEG3</i>     | 55384        |
| 237945_at    | Maternally expressed (in Callipyge) 8                                                    | <i>MEG8</i>     | ---          |
| 236517_at    | multiple EGF-like-domains 10                                                             | <i>MEGF10</i>   | 84466        |
| 226869_at    | multiple EGF-like-domains 6                                                              | <i>MEGF6</i>    | 1953         |
| 207480_s_at  | Meis homeobox 2                                                                          | <i>MEIS2</i>    | 4212         |
| 214077_x_at  | Meis homeobox 3 pseudogene 1                                                             | <i>MEIS3P1</i>  | 4213         |
| 202645_s_at  | multiple endocrine neoplasia I                                                           | <i>MEN1</i>     | 4221         |
| 233079_at    | c-mer proto-oncogene tyrosine kinase                                                     | <i>MERTK</i>    | 10461        |
| 1556015_a_at | mesoderm posterior 2 homolog (mouse)                                                     | <i>MESP2</i>    | 145873       |
| 202016_at    | mesoderm specific transcript homolog (mouse)                                             | <i>MEST</i>     | 4232         |
| 212673_at    | methionyl aminopeptidase 1                                                               | <i>METAP1</i>   | 23173        |
| 209861_s_at  | methionyl aminopeptidase 2                                                               | <i>METAP2</i>   | 10988        |
| 226744_at    | methyltransferase 10 domain containing                                                   | <i>METT10D</i>  | 79066        |
| 238931_at    | methyltransferase 10 domain containing                                                   | <i>METT10D</i>  | 79066        |
| 218366_x_at  | methyltransferase 11 domain containing 1                                                 | <i>METT11D1</i> | 64745 /// 7: |
| 1565898_at   | Methyltransferase 5 domain containing 1                                                  | <i>METT5D1</i>  | 196074       |
| 1565900_at   | Methyltransferase 5 domain containing 1                                                  | <i>METT5D1</i>  | 196074       |
| 238773_at    | methyltransferase 5 domain containing 1                                                  | <i>METT5D1</i>  | 196074       |
| 209265_s_at  | methyltransferase like 3                                                                 | <i>METTL3</i>   | 56339        |
| 219698_s_at  | methyltransferase like 4                                                                 | <i>METTL4</i>   | 64863        |
| 232194_at    | methyltransferase like 4                                                                 | <i>METTL4</i>   | 64863        |
| 1553689_s_at | methyltransferase like 6                                                                 | <i>METTL6</i>   | 131965       |
| 207761_s_at  | methyltransferase like 7A                                                                | <i>METTL7A</i>  | 25840        |
| 209703_x_at  | methyltransferase like 7A                                                                | <i>METTL7A</i>  | 25840        |
| 1554667_s_at | methyltransferase like 8                                                                 | <i>METTL8</i>   | 79828        |
| 217868_s_at  | methyltransferase like 9                                                                 | <i>METTL9</i>   | 51108        |
| 230395_at    | Methyltransferase like 9                                                                 | <i>METTL9</i>   | ---          |
| 218247_s_at  | mex-3 homolog C ( <i>C. elegans</i> )                                                    | <i>MEX3C</i>    | 51320        |
| 203406_at    | microfibrillar-associated protein 1                                                      | <i>MFAP1</i>    | 4236         |
| 205442_at    | microfibrillar-associated protein 3-like                                                 | <i>MFAP3L</i>   | 9848         |
| 204152_s_at  | MFNG O-fucosylpeptide 3-beta-N-acetylglucosaminyltransferase                             | <i>MFNG</i>     | 4242         |
| 224286_at    | membrane frizzled-related protein                                                        | <i>MFRP</i>     | 114902 /// § |
| 223242_s_at  | major facilitator superfamily domain containing 11                                       | <i>MFSD11</i>   | 79157        |
| 225316_at    | major facilitator superfamily domain containing 2                                        | <i>MFSD2</i>    | 84879        |
| 228282_at    | Major facilitator superfamily domain containing 8                                        | <i>MFSD8</i>    | 256471       |
| 212945_s_at  | MAX gene associated                                                                      | <i>MGA</i>      | 23269        |
| 206522_at    | maltase-glucoamylase (alpha-glucosidase)                                                 | <i>MGAM</i>     | 642103 /// § |
| 201126_s_at  | mannosyl (alpha-1,3-)-glycoprotein beta-1,2-N-acetylglucosaminyltransferase              | <i>MGAT1</i>    | 4245         |
| 224429_x_at  | pseudogene MGC10997                                                                      | <i>MGC10997</i> | ---          |
| 223682_s_at  | hypothetical protein MGC11102                                                            | <i>MGC11102</i> | 84285        |
| 224452_s_at  | hypothetical protein LOC84792                                                            | <i>MGC12966</i> | 84792        |
| 225052_at    | hypothetical protein MGC14327                                                            | <i>MGC14327</i> | 94107        |
| 214696_at    | hypothetical protein MGC14376                                                            | <i>MGC14376</i> | 84981        |
| 212890_at    | hypothetical protein MGC15523                                                            | <i>MGC15523</i> | 124565       |
| 1561850_at   | hypothetical protein MGC15613                                                            | <i>MGC15613</i> | 84963        |
| 1553708_at   | hypothetical protein MGC16075                                                            | <i>MGC16075</i> | 84847        |
| 232822_x_at  | Hypothetical protein MGC16121                                                            | <i>MGC16121</i> | 84848        |
| 226126_at    | hypothetical protein MGC16169                                                            | <i>MGC16169</i> | 93627        |

|              |                                                                                |                                             |              |
|--------------|--------------------------------------------------------------------------------|---------------------------------------------|--------------|
| 234011_at    | hypothetical protein MGC16384                                                  | <i>MGC16384</i>                             | 114130       |
| 1552330_at   | hypothetical protein MGC16385                                                  | <i>MGC16385</i>                             | 92806        |
| 1563863_x_at | TFS2-M domain-containing protein 1                                             | <i>MGC17403</i>                             | 170082       |
| 230807_at    | hypothetical protein MGC20983                                                  | <i>MGC20983</i>                             | 115948       |
| 228551_at    | hypothetical protein MGC24039                                                  | <i>MGC24039</i>                             | 160518       |
| 232568_at    | hypothetical protein MGC24103                                                  | <i>MGC24103</i>                             | 158295       |
| 1559170_at   | Similar to ankyrin repeat domain 20A                                           | <i>MGC26718</i>                             | 440482       |
| 218624_s_at  | hypothetical protein MGC2752                                                   | <i>MGC2752</i>                              | 65996        |
| 230528_s_at  | hypothetical protein MGC2752                                                   | <i>MGC2752</i>                              | 65996        |
| 210484_s_at  | tumor necrosis factor receptor superfamily, member 10c, decoy without an intr. | <i>MGC31957</i> /// <i>TNF</i> 254896 /// § |              |
| 225003_at    | hypothetical protein MGC3205 /// MBC3205                                       | <i>MGC3205</i> /// <i>UNQ</i> 374882 /// §  |              |
| 228077_at    | hypothetical protein MGC3207                                                   | <i>MGC3207</i>                              | 84245        |
| 220305_at    | hypothetical protein MGC3260                                                   | <i>MGC3260</i>                              | 57506        |
| 229741_at    | Hypothetical protein MGC3260                                                   | <i>MGC3260</i>                              | 57506        |
| 231043_at    | similar to hypothetical protein                                                | <i>MGC33657</i>                             | 200373       |
| 226657_at    | transcript expressed during hematopoiesis 2                                    | <i>MGC33894</i>                             | 256302       |
| 219766_at    | hypothetical protein MGC4093                                                   | <i>MGC4093</i>                              | 80776        |
| 239104_at    | hypothetical locus MGC42157                                                    | <i>MGC42157</i>                             | 439933       |
| 1564362_x_at | hypothetical protein MGC46336                                                  | <i>MGC46336</i>                             | 283933       |
| 207775_at    | hypothetical protein MGC4859 similar to HSPA8                                  | <i>MGC4859</i>                              | 79150        |
| 1563474_at   | hypothetical protein MGC50559                                                  | <i>MGC50559</i>                             | 254013       |
| 225409_at    | hypothetical protein MGC52110                                                  | <i>MGC52110</i>                             | 493753       |
| 237033_at    | hypothetical protein MGC52498                                                  | <i>MGC52498</i>                             | 348378       |
| 229711_s_at  | hypothetical protein MGC5370                                                   | <i>MGC5370</i>                              | 84825        |
| 221477_s_at  | hypothetical protein MGC5618                                                   | <i>MGC5618</i>                              | 6648         |
| 227983_at    | hypothetical protein MGC7036                                                   | <i>MGC7036</i>                              | 196383       |
| 242136_x_at  | Hypothetical LOC403340                                                         | <i>MGC70870</i>                             | 403340       |
| 224573_at    | similar to DNA segment, Chr 11, Brigham & Womens Genetics 0434 expressed       | <i>MGC71993</i>                             | 440400       |
| 244741_s_at  | Hypothetical protein MGC9913                                                   | <i>MGC9913</i>                              | 386759       |
| 200899_s_at  | meningioma expressed antigen 5 (hyaluronidase)                                 | <i>MGEA5</i>                                | 10724        |
| 223494_at    | meningioma expressed antigen 5 (hyaluronidase)                                 | <i>MGEA5</i>                                | 10724        |
| 200898_s_at  | meningioma expressed antigen 5 (hyaluronidase)                                 | <i>MGEA5</i>                                | 10724        |
| 211026_s_at  | monoglyceride lipase                                                           | <i>MGLL</i>                                 | 11343        |
| 225102_at    | monoglyceride lipase                                                           | <i>MGLL</i>                                 | 11343        |
| 1565162_s_at | microsomal glutathione S-transferase 1                                         | <i>MGST1</i>                                | 4257         |
| 224918_x_at  | microsomal glutathione S-transferase 1                                         | <i>MGST1</i>                                | 4257         |
| 231736_x_at  | microsomal glutathione S-transferase 1                                         | <i>MGST1</i>                                | 4257         |
| 204168_at    | microsomal glutathione S-transferase 2                                         | <i>MGST2</i>                                | 4258         |
| 244122_at    | Microsomal glutathione S-transferase 3                                         | <i>MGST3</i>                                | 4259         |
| 212310_at    | melanoma inhibitory activity family, member 3                                  | <i>MIA3</i>                                 | 375056       |
| 228658_at    | myocardial infarction associated transcript (non-protein coding)               | <i>MIAT</i>                                 | 440823       |
| 237322_at    | myocardial infarction associated transcript (non-protein coding)               | <i>MIAT</i>                                 | 440823       |
| 1558645_at   | mindbomb homolog 1 (Drosophila)                                                | <i>MIB1</i>                                 | 57534        |
| 224722_at    | mindbomb homolog 1 (Drosophila)                                                | <i>MIB1</i>                                 | 57534        |
| 224726_at    | mindbomb homolog 1 (Drosophila)                                                | <i>MIB1</i>                                 | 57534        |
| 228261_at    | mindbomb homolog 2 (Drosophila)                                                | <i>MIB2</i>                                 | 142678       |
| 226644_at    | mindbomb homolog 2 (Drosophila)                                                | <i>MIB2</i>                                 | 142678       |
| 212472_at    | microtubule associated monooxygenase, calponin and LIM domain containing 2     | <i>MICAL2</i>                               | 9645         |
| 212473_s_at  | microtubule associated monooxygenase, calponin and LIM domain containing 2     | <i>MICAL2</i>                               | 9645         |
| 55081_at     | MICAL-like 1                                                                   | <i>MICALL1</i>                              | 85377        |
| 1555105_a_at | mesoderm induction early response 1 homolog (Xenopus laevis)                   | <i>MIER1</i>                                | 57708        |
| 217871_s_at  | macrophage migration inhibitory factor (glycosylation-inhibiting factor)       | <i>MIF</i>                                  | 284889 /// § |
| 213189_at    | MYC induced nuclear antigen                                                    | <i>MINA</i>                                 | 84864        |
| 213188_s_at  | MYC induced nuclear antigen                                                    | <i>MINA</i>                                 | 84864        |
| 229132_at    | MYC induced nuclear antigen                                                    | <i>MINA</i>                                 | 84864        |
| 209585_s_at  | multiple inositol polyphosphate histidine phosphatase, 1                       | <i>MINPP1</i>                               | 9562         |
| 1570052_at   | mirror-image polydactyly 1                                                     | <i>MIPOL1</i>                               | 145282       |
| 224917_at    | microRNA 21                                                                    | <i>MIRN21</i>                               | 406991       |
| 220990_s_at  | transmembrane protein 49 /// microRNA 21                                       | <i>MIRN21</i> /// <i>TMEM</i> 406991 /// §  |              |
| 226329_s_at  | MIT, microtubule interacting and transport, domain containing 1                | <i>MITD1</i>                                | 129531       |
| 226066_at    | microphthalmia-associated transcription factor                                 | <i>MITF</i>                                 | 4286         |
| 207233_s_at  | microphthalmia-associated transcription factor                                 | <i>MITF</i>                                 | 4286         |
| 224714_at    | MKI67 (FHA domain) interacting nucleolar phosphoprotein                        | <i>MKI67IP</i>                              | 84365        |



|              |                                                                                       |                |        |
|--------------|---------------------------------------------------------------------------------------|----------------|--------|
| 1558777_at   | MKL/myocardin-like 2                                                                  | <i>MKL2</i>    | 57496  |
| 209467_s_at  | MAP kinase interacting serine/threonine kinase 1                                      | <i>MKNK1</i>   | 8569   |
| 243256_at    | MAP kinase interacting serine/threonine kinase 1                                      | <i>MKNK1</i>   | 8569   |
| 223199_at    | MAP kinase interacting serine/threonine kinase 2                                      | <i>MKNK2</i>   | 2872   |
| 218205_s_at  | MAP kinase interacting serine/threonine kinase 2                                      | <i>MKNK2</i>   | 2872   |
| 209845_at    | makorin, ring finger protein, 1                                                       | <i>MKRN1</i>   | 23608  |
| 218071_s_at  | makorin, ring finger protein, 2                                                       | <i>MKRN2</i>   | 23609  |
| 1555820_a_at | Meckel syndrome, type 1                                                               | <i>MKS1</i>    | 54903  |
| 239468_at    | mohawk homeobox                                                                       | <i>MKX</i>     | 283078 |
| 204783_at    | myeloid leukemia factor 1                                                             | <i>MLF1</i>    | 4291   |
| 218883_s_at  | MLF1 interacting protein                                                              | <i>MLF1IP</i>  | 79682  |
| 229305_at    | MLF1 interacting protein                                                              | <i>MLF1IP</i>  | 79682  |
| 229304_s_at  | MLF1 interacting protein                                                              | <i>MLF1IP</i>  | 79682  |
| 200948_at    | myeloid leukemia factor 2                                                             | <i>MLF2</i>    | 8079   |
| 204838_s_at  | mutL homolog 3 (E. coli)                                                              | <i>MLH3</i>    | 27030  |
| 238025_at    | mixed lineage kinase domain-like                                                      | <i>MLKL</i>    | 197259 |
| 1565436_s_at | myeloid/lymphoid or mixed-lineage leukemia (trithorax homolog, Drosophila)            | <i>MLL</i>     | 4297   |
| 226981_at    | Myeloid/lymphoid or mixed-lineage leukemia (trithorax homolog, Drosophila)            | <i>MLL</i>     | 4297   |
| 212080_at    | Myeloid/lymphoid or mixed-lineage leukemia (trithorax homolog, Drosophila)            | <i>MLL</i>     | 4297   |
| 212076_at    | myeloid/lymphoid or mixed-lineage leukemia (trithorax homolog, Drosophila)            | <i>MLL</i>     | 4297   |
| 222414_at    | myeloid/lymphoid or mixed-lineage leukemia 3                                          | <i>MLL3</i>    | 58508  |
| 222413_s_at  | myeloid/lymphoid or mixed-lineage leukemia 3                                          | <i>MLL3</i>    | 58508  |
| 222415_at    | myeloid/lymphoid or mixed-lineage leukemia 3                                          | <i>MLL3</i>    | 58508  |
| 226100_at    | myeloid/lymphoid or mixed-lineage leukemia 5 (trithorax homolog, Drosophila)          | <i>MLL5</i>    | 55904  |
| 223190_s_at  | myeloid/lymphoid or mixed-lineage leukemia 5 (trithorax homolog, Drosophila)          | <i>MLL5</i>    | 55904  |
| 223189_x_at  | myeloid/lymphoid or mixed-lineage leukemia 5 (trithorax homolog, Drosophila)          | <i>MLL5</i>    | 55904  |
| 205408_at    | myeloid/lymphoid or mixed-lineage leukemia (trithorax homolog, Drosophila); t         | <i>MLLT10</i>  | 8028   |
| 204918_s_at  | myeloid/lymphoid or mixed-lineage leukemia (trithorax homolog, Drosophila); t         | <i>MLLT3</i>   | 4300   |
| 204917_s_at  | myeloid/lymphoid or mixed-lineage leukemia (trithorax homolog, Drosophila); t         | <i>MLLT3</i>   | 4300   |
| 225628_s_at  | myeloid/lymphoid or mixed-lineage leukemia (trithorax homolog, Drosophila); t         | <i>MLLT6</i>   | 4302   |
| 239108_at    | Male sterility domain containing 1                                                    | <i>MLSTD1</i>  | 55711  |
| 220615_s_at  | male sterility domain containing 1                                                    | <i>MLSTD1</i>  | 55711  |
| 224865_at    | male sterility domain containing 2                                                    | <i>MLSTD2</i>  | 84188  |
| 224866_at    | male sterility domain containing 2                                                    | <i>MLSTD2</i>  | 84188  |
| 1558014_s_at | male sterility domain containing 2                                                    | <i>MLSTD2</i>  | 84188  |
| 217909_s_at  | MAX-like protein X                                                                    | <i>MLX</i>     | 6945   |
| 213708_s_at  | MAX-like protein X                                                                    | <i>MLX</i>     | 6945   |
| 217910_x_at  | MAX-like protein X                                                                    | <i>MLX</i>     | 6945   |
| 210752_s_at  | MAX-like protein X                                                                    | <i>MLX</i>     | 6945   |
| 225157_at    | MLX interacting protein                                                               | <i>MLXIP</i>   | 22877  |
| 202519_at    | MLX interacting protein                                                               | <i>MLXIP</i>   | 22877  |
| 242750_at    | methylmalonic aciduria (cobalamin deficiency) cblA type                               | <i>MMAA</i>    | 166785 |
| 203434_s_at  | membrane metallo-endorpeptidase                                                       | <i>MME</i>     | 4311   |
| 203435_s_at  | membrane metallo-endorpeptidase                                                       | <i>MME</i>     | 4311   |
| 160020_at    | matrix metallopeptidase 14 (membrane-inserted)                                        | <i>MMP14</i>   | 4323   |
| 207012_at    | matrix metallopeptidase 16 (membrane-inserted)                                        | <i>MMP16</i>   | 4325   |
| 207890_s_at  | matrix metallopeptidase 25                                                            | <i>MMP25</i>   | 64386  |
| 220541_at    | matrix metallopeptidase 26                                                            | <i>MMP26</i>   | 56547  |
| 207329_at    | matrix metallopeptidase 8 (neutrophil collagenase)                                    | <i>MMP8</i>    | 4317   |
| 203936_s_at  | matrix metallopeptidase 9 (gelatinase B, 92kDa gelatinase, 92kDa type IV collagenase) | <i>MMP9</i>    | 4318   |
| 236262_at    | multimerin 2                                                                          | <i>MMRN2</i>   | 79812  |
| 219703_at    | meiosis-specific nuclear structural 1                                                 | <i>MNS1</i>    | 55329  |
| 204206_at    | MAX binding protein                                                                   | <i>MNT</i>     | 4335   |
| 212508_at    | modulator of apoptosis 1                                                              | <i>MOAP1</i>   | 64112  |
| 201297_s_at  | MOB1, Mps One Binder kinase activator-like 1B (yeast)                                 | <i>MOBKL1B</i> | 55233  |
| 201298_s_at  | MOB1, Mps One Binder kinase activator-like 1B (yeast)                                 | <i>MOBKL1B</i> | 55233  |
| 235163_at    | MOB1, Mps One Binder kinase activator-like 2A (yeast)                                 | <i>MOBKL2A</i> | 126308 |
| 225530_at    | MOB1, Mps One Binder kinase activator-like 2A (yeast)                                 | <i>MOBKL2A</i> | 126308 |
| 226844_at    | MOB1, Mps One Binder kinase activator-like 2B (yeast)                                 | <i>MOBKL2B</i> | 79817  |
| 1563521_at   | MOB1, Mps One Binder kinase activator-like 2B (yeast)                                 | <i>MOBKL2B</i> | 79817  |
| 202918_s_at  | MOB1, Mps One Binder kinase activator-like 3 (yeast)                                  | <i>MOBKL3</i>  | 25843  |
| 212754_s_at  | MON2 homolog (S. cerevisiae)                                                          | <i>MON2</i>    | 23041  |
| 220850_at    | MORC family CW-type zinc finger 1                                                     | <i>MORC1</i>   | 27136  |

|              |                                                                           |                 |              |
|--------------|---------------------------------------------------------------------------|-----------------|--------------|
| 203956_at    | MORC family CW-type zinc finger 2                                         | <i>MORC2</i>    | 22880        |
| 213000_at    | MORC family CW-type zinc finger 3                                         | <i>MORC3</i>    | 23515        |
| 243683_at    | Mortality factor 4 like 2                                                 | <i>MORF4L2</i>  | 9643         |
| 243857_at    | Mortality factor 4 like 2                                                 | <i>MORF4L2</i>  | 9643         |
| 201994_at    | mortality factor 4 like 2                                                 | <i>MORF4L2</i>  | 9643         |
| 218853_s_at  | motile sperm domain containing 1                                          | <i>MOSPD1</i>   | 56180        |
| 1557455_s_at | motile sperm domain containing 1                                          | <i>MOSPD1</i>   | 56180        |
| 226841_at    | macrophage expressed gene 1                                               | <i>MPEG1</i>    | 219972       |
| 226818_at    | macrophage expressed gene 1                                               | <i>MPEG1</i>    | 219972       |
| 205235_s_at  | M-phase phosphoprotein 1                                                  | <i>MPHOSPH1</i> | 9585         |
| 202472_at    | mannose phosphate isomerase                                               | <i>MPI</i>      | 4351         |
| 202974_at    | membrane protein, palmitoylated 1, 55kDa                                  | <i>MPP1</i>     | 4354         |
| 226092_at    | membrane protein, palmitoylated 5 (MAGUK p55 subfamily member 5)          | <i>MPP5</i>     | 64398        |
| 209858_x_at  | metallophosphoesterase 1                                                  | <i>MPPE1</i>    | 65258        |
| 213727_x_at  | metallophosphoesterase 1                                                  | <i>MPPE1</i>    | 65258        |
| 206764_x_at  | metallophosphoesterase 1                                                  | <i>MPPE1</i>    | 65258        |
| 215692_s_at  | metallophosphoesterase domain containing 2                                | <i>MPPED2</i>   | 744          |
| 1559167_x_at | MPV17 mitochondrial membrane protein-like                                 | <i>MPV17L</i>   | 255027       |
| 210210_at    | myelin protein zero-like 1                                                | <i>MPZL1</i>    | 9019         |
| 203780_at    | myelin protein zero-like 2                                                | <i>MPZL2</i>    | 10205        |
| 230518_at    | myelin protein zero-like 2                                                | <i>MPZL2</i>    | 10205        |
| 227747_at    | myelin protein zero-like 3                                                | <i>MPZL3</i>    | 196264       |
| 207566_at    | major histocompatibility complex, class I-related                         | <i>MR1</i>      | 3140         |
| 242456_at    | MRE11 meiotic recombination 11 homolog A ( <i>S. cerevisiae</i> )         | <i>MRE11A</i>   | 4361         |
| 232682_at    | melanoregulin                                                             | <i>MREG</i>     | 55686        |
| 226091_s_at  | Mof4 family associated protein 1                                          | <i>MRFAP1</i>   | 93621        |
| 1553504_at   | MAS-related GPR, member X4                                                | <i>MRGPRX4</i>  | 117196       |
| 214771_x_at  | myosin phosphatase-Rho interacting protein                                | <i>M-RIP</i>    | 23164        |
| 212197_x_at  | myosin phosphatase-Rho interacting protein                                | <i>M-RIP</i>    | 23164        |
| 204386_s_at  | mitochondrial ribosomal protein 63                                        | <i>MRP63</i>    | 78988        |
| 218049_s_at  | mitochondrial ribosomal protein L13                                       | <i>MRPL13</i>   | 28998        |
| 220526_s_at  | mitochondrial ribosomal protein L20                                       | <i>MRPL20</i>   | 55052 /// 64 |
| 213897_s_at  | mitochondrial ribosomal protein L23                                       | <i>MRPL23</i>   | 6150         |
| 225260_s_at  | mitochondrial ribosomal protein L32                                       | <i>MRPL32</i>   | 64983        |
| 218558_s_at  | mitochondrial ribosomal protein L39                                       | <i>MRPL39</i>   | 54148        |
| 223742_at    | mitochondrial ribosomal protein L4                                        | <i>MRPL4</i>    | 51073        |
| 227186_s_at  | mitochondrial ribosomal protein L41                                       | <i>MRPL41</i>   | 64975        |
| 230027_s_at  | mitochondrial ribosomal protein L43                                       | <i>MRPL43</i>   | 84545        |
| 223481_s_at  | mitochondrial ribosomal protein L47                                       | <i>MRPL47</i>   | 57129        |
| 225581_s_at  | mitochondrial ribosomal protein L50                                       | <i>MRPL50</i>   | 54534        |
| 225580_at    | mitochondrial ribosomal protein L50                                       | <i>MRPL50</i>   | 54534        |
| 225719_s_at  | mitochondrial ribosomal protein L55                                       | <i>MRPL55</i>   | 128308       |
| 209609_s_at  | mitochondrial ribosomal protein L9                                        | <i>MRPL9</i>    | 65005        |
| 211595_s_at  | mitochondrial ribosomal protein S11                                       | <i>MRPS11</i>   | 64963        |
| 226296_s_at  | mitochondrial ribosomal protein S15                                       | <i>MRPS15</i>   | 64960        |
| 222499_at    | mitochondrial ribosomal protein S16                                       | <i>MRPS16</i>   | 51021        |
| 218982_s_at  | mitochondrial ribosomal protein S17                                       | <i>MRPS17</i>   | 51373        |
| 218385_at    | mitochondrial ribosomal protein S18A                                      | <i>MRPS18A</i>  | 55168        |
| 222997_s_at  | mitochondrial ribosomal protein S21                                       | <i>MRPS21</i>   | 148523 /// 5 |
| 223156_at    | mitochondrial ribosomal protein S23                                       | <i>MRPS23</i>   | 51649        |
| 218398_at    | mitochondrial ribosomal protein S30                                       | <i>MRPS30</i>   | 10884        |
| 217942_at    | mitochondrial ribosomal protein S35                                       | <i>MRPS35</i>   | 60488        |
| 224333_s_at  | mitochondrial ribosomal protein S5                                        | <i>MRPS5</i>    | 64969        |
| 217932_at    | mitochondrial ribosomal protein S7                                        | <i>MRPS7</i>    | 51081        |
| 218538_s_at  | MRS2-like, magnesium homeostasis factor ( <i>S. cerevisiae</i> )          | <i>MRS2L</i>    | 57380        |
| 218536_at    | MRS2-like, magnesium homeostasis factor ( <i>S. cerevisiae</i> )          | <i>MRS2L</i>    | 57380        |
| 228592_at    | membrane-spanning 4-domains, subfamily A, member 1                        | <i>MS4A1</i>    | 931          |
| 217418_x_at  | membrane-spanning 4-domains, subfamily A, member 1                        | <i>MS4A1</i>    | 931          |
| 228599_at    | membrane-spanning 4-domains, subfamily A, member 1                        | <i>MS4A1</i>    | 931          |
| 210254_at    | membrane-spanning 4-domains, subfamily A, member 3 (hematopoietic cell-sp | <i>MS4A3</i>    | 932          |
| 1554892_a_at | membrane-spanning 4-domains, subfamily A, member 3 (hematopoietic cell-sp | <i>MS4A3</i>    | 932          |
| 202911_at    | mutS homolog 6 ( <i>E. coli</i> )                                         | <i>MSH6</i>     | 2956         |
| 225240_s_at  | musashi homolog 2 ( <i>Drosophila</i> )                                   | <i>MSI2</i>     | 124540       |

|             |                                                                                |                       |             |
|-------------|--------------------------------------------------------------------------------|-----------------------|-------------|
| 224765_at   | male-specific lethal-1 homolog                                                 | <i>MSL-1</i>          | 339287      |
| 212708_at   | male-specific lethal-1 homolog                                                 | <i>MSL-1</i>          | 339287      |
| 214009_at   | male-specific lethal 3-like 1 (Drosophila)                                     | <i>MSL3L1</i>         | 10943       |
| 207551_s_at | male-specific lethal 3-like 1 (Drosophila)                                     | <i>MSL3L1</i>         | 10943       |
| 214770_at   | macrophage scavenger receptor 1                                                | <i>MSR1</i>           | 4481        |
| 208423_s_at | macrophage scavenger receptor 1                                                | <i>MSR1</i>           | 4481        |
| 219281_at   | methionine sulfoxide reductase A                                               | <i>MSRA</i>           | 4482        |
| 218773_s_at | methionine sulfoxide reductase B2                                              | <i>MSRB2</i>          | 22921       |
| 219451_at   | methionine sulfoxide reductase B2                                              | <i>MSRB2</i>          | 22921       |
| 225782_at   | methionine sulfoxide reductase B3                                              | <i>MSRB3</i>          | 253827      |
| 213382_at   | macrophage stimulating 1 (hepatocyte growth factor-like) /// macrophage stim   | <i>MST1 /// MSTP9</i> | 11223 /// 4 |
| 228337_at   | MSTP101                                                                        | <i>MST101</i>         | 114825      |
| 215563_s_at | macrophage stimulating, pseudogene 9                                           | <i>MSTP9</i>          | 11223       |
| 221953_s_at | Metallothionein 1 pseudogene 3                                                 | <i>MT1P3</i>          | 10893       |
| 244272_s_at | Membrane targeting (tandem) C2 domain containing 1                             | <i>MTAC2D1</i>        | 123036      |
| 211364_at   | methylthioadenosine phosphorylase                                              | <i>MTAP</i>           | 4507        |
| 1563614_at  | Mdm2, transformed 3T3 cell double minute 2, p53 binding protein (mouse) binc   | <i>MTBP</i>           | 27085       |
| 217772_s_at | mitochondrial carrier homolog 2 (C. elegans)                                   | <i>MTCH2</i>          | 23788       |
| 216862_s_at | mature T-cell proliferation 1                                                  | <i>MTCP1</i>          | 100133946 , |
| 212248_at   | CDNA FLJ41088 fis, clone ASTRO2002459 /// Metadherin                           | <i>MTDH</i>           | 92140       |
| 219363_s_at | MTERF domain containing 1                                                      | <i>MTERFD1</i>        | 51001       |
| 226486_at   | MTERF domain containing 2                                                      | <i>MTERFD2</i>        | 130916      |
| 225346_at   | MTERF domain containing 3                                                      | <i>MTERFD3</i>        | 80298       |
| 225341_at   | MTERF domain containing 3                                                      | <i>MTERFD3</i>        | 80298       |
| 209704_at   | metal response element binding transcription factor 2                          | <i>MTF2</i>           | 22823       |
| 203346_s_at | metal response element binding transcription factor 2                          | <i>MTF2</i>           | 22823       |
| 209705_at   | metal response element binding transcription factor 2                          | <i>MTF2</i>           | 22823       |
| 203345_s_at | metal response element binding transcription factor 2                          | <i>MTF2</i>           | 22823       |
| 203347_s_at | metal response element binding transcription factor 2                          | <i>MTF2</i>           | 22823       |
| 203208_s_at | mitochondrial fission regulator 1                                              | <i>MTFR1</i>          | 9650        |
| 238762_at   | methylenetetrahydrofolate dehydrogenase (NADP+ dependent) 2-like               | <i>MTHFD2L</i>        | 441024      |
| 242370_at   | methylenetetrahydrofolate dehydrogenase (NADP+ dependent) 2-like               | <i>MTHFD2L</i>        | 441024      |
| 220346_at   | methylenetetrahydrofolate dehydrogenase (NADP+ dependent) 2-like               | <i>MTHFD2L</i>        | 441024      |
| 239035_at   | 5,10-methylenetetrahydrofolate reductase (NADPH)                               | <i>MTHFR</i>          | 4524        |
| 203433_at   | 5,10-methenyltetrahydrofolate synthetase (5-formyltetrahydrofolate cyclo-ligas | <i>MTHFS</i>          | 10588       |
| 218879_s_at | methenyltetrahydrofolate synthetase domain containing                          | <i>MTHFSD</i>         | 64779       |
| 203095_at   | mitochondrial translational initiation factor 2                                | <i>MTIF2</i>          | 4528        |
| 204101_at   | myotubularin 1                                                                 | <i>MTM1</i>           | 4534        |
| 36920_at    | myotubularin 1                                                                 | <i>MTM1</i>           | 4534        |
| 213511_s_at | myotubularin related protein 1                                                 | <i>MTMR1</i>          | 8776        |
| 216095_x_at | myotubularin related protein 1                                                 | <i>MTMR1</i>          | 8776        |
| 214975_s_at | myotubularin related protein 1                                                 | <i>MTMR1</i>          | 8776        |
| 225810_at   | myotubularin related protein 10                                                | <i>MTMR10</i>         | 54893       |
| 225232_at   | myotubularin related protein 12                                                | <i>MTMR12</i>         | 54545       |
| 220953_s_at | myotubularin related protein 12                                                | <i>MTMR12</i>         | 54545       |
| 222143_s_at | myotubularin related protein 14                                                | <i>MTMR14</i>         | 64419       |
| 232342_at   | Myotubularin related protein 14                                                | <i>MTMR14</i>         | 64419       |
| 239289_x_at | myotubularin related protein 15                                                | <i>MTMR15</i>         | 22909       |
| 203678_at   | myotubularin related protein 15                                                | <i>MTMR15</i>         | 22909       |
| 203211_s_at | myotubularin related protein 2                                                 | <i>MTMR2</i>          | 8898        |
| 202198_s_at | myotubularin related protein 3                                                 | <i>MTMR3</i>          | 8897        |
| 202197_at   | myotubularin related protein 3                                                 | <i>MTMR3</i>          | 8897        |
| 211507_s_at | myotubularin related protein 3                                                 | <i>MTMR3</i>          | 8897        |
| 214268_s_at | myotubularin related protein 4                                                 | <i>MTMR4</i>          | 9110        |
| 212277_at   | myotubularin related protein 4                                                 | <i>MTMR4</i>          | 9110        |
| 214429_at   | myotubularin related protein 6                                                 | <i>MTMR6</i>          | 9107        |
| 217292_at   | myotubularin related protein 7                                                 | <i>MTMR7</i>          | 9108        |
| 233101_at   | myotubularin related protein 9                                                 | <i>MTMR9</i>          | 66036       |
| 204837_at   | myotubularin related protein 9                                                 | <i>MTMR9</i>          | 66036       |
| 213278_at   | myotubularin related protein 9                                                 | <i>MTMR9</i>          | 66036       |
| 233665_x_at | mitochondrial translation optimization 1 homolog (S. cerevisiae)               | <i>MTO1</i>           | 25821       |
| 218716_x_at | mitochondrial translation optimization 1 homolog (S. cerevisiae)               | <i>MTO1</i>           | 25821       |
| 224430_s_at | mitochondrial translation optimization 1 homolog (S. cerevisiae)               | <i>MTO1</i>           | 25821       |

|              |                                                                                                   |                         |              |
|--------------|---------------------------------------------------------------------------------------------------|-------------------------|--------------|
| 223172_s_at  | mitochondrial protein 18 kDa                                                                      | <i>MTP18</i>            | 51537        |
| 225215_s_at  | mitochondrial translational release factor 1-like                                                 | <i>MTRF1L</i>           | 54516        |
| 203200_s_at  | 5-methyltetrahydrofolate-homocysteine methyltransferase reductase                                 | <i>MTRR</i>             | 4552         |
| 203517_at    | metaxin 2                                                                                         | <i>MTX2</i>             | 10651        |
| 217117_x_at  | mucin 3A, cell surface associated                                                                 | <i>MUC3A</i>            | 4584         |
| 230461_s_at  | Melanoma associated antigen (mutated) 1                                                           | <i>MUM1</i>             | ---          |
| 207727_s_at  | mutY homolog (E. coli)                                                                            | <i>MUTYH</i>            | 4595         |
| 203027_s_at  | mevalonate (diphospho) decarboxylase                                                              | <i>MVD</i>              | 4597         |
| 231878_at    | Major vault protein                                                                               | <i>MVP</i>              | 79447        |
| 202086_at    | myxovirus (influenza virus) resistance 1, interferon-inducible protein p78 (mouse)                | <i>MX1</i>              | 4599         |
| 204994_at    | myxovirus (influenza virus) resistance 2 (mouse)                                                  | <i>MX2</i>              | 4600         |
| 228846_at    | MAX dimerization protein 1                                                                        | <i>MXD1</i>             | 4084         |
| 226275_at    | MAX dimerization protein 1                                                                        | <i>MXD1</i>             | 4084         |
| 206877_at    | MAX dimerization protein 1                                                                        | <i>MXD1</i>             | 4084         |
| 210778_s_at  | MAX dimerization protein 4                                                                        | <i>MXD4</i>             | 10608        |
| 212347_x_at  | MAX dimerization protein 4                                                                        | <i>MXD4</i>             | 10608        |
| 202364_at    | MAX interactor 1                                                                                  | <i>MXI1</i>             | 4601         |
| 224920_x_at  | myeloid-associated differentiation marker                                                         | <i>MYADM</i>            | 91663        |
| 225673_at    | myeloid-associated differentiation marker                                                         | <i>MYADM</i>            | 91663        |
| 204798_at    | v-myb myeloblastosis viral oncogene homolog (avian)                                               | <i>MYB</i>              | 4602         |
| 213906_at    | v-myb myeloblastosis viral oncogene homolog (avian)-like 1                                        | <i>MYBL1</i>            | 4603         |
| 203361_s_at  | c-myc binding protein                                                                             | <i>MYCBP</i>            | 26292        |
| 203359_s_at  | c-myc binding protein                                                                             | <i>MYCBP</i>            | 26292        |
| 203360_s_at  | c-myc binding protein                                                                             | <i>MYCBP</i>            | 26292        |
| 201959_s_at  | MYC binding protein 2                                                                             | <i>MYCBP2</i>           | 23077        |
| 201960_s_at  | MYC binding protein 2                                                                             | <i>MYCBP2</i>           | 23077        |
| 1557370_s_at | MYC binding protein 2                                                                             | <i>MYCBP2</i>           | 23077        |
| 231947_at    | myc target 1                                                                                      | <i>MYCT1</i>            | 80177        |
| 222772_at    | myelin expression factor 2                                                                        | <i>MYEF2</i>            | 50804        |
| 229464_at    | myelin expression factor 2                                                                        | <i>MYEF2</i>            | 50804        |
| 226845_s_at  | myeloma overexpressed 2                                                                           | <i>MYEOV2</i>           | 150678       |
| 223130_s_at  | myosin regulatory light chain interacting protein                                                 | <i>MYLIP</i>            | 29116        |
| 228098_s_at  | myosin regulatory light chain interacting protein                                                 | <i>MYLIP</i>            | 29116        |
| 223129_x_at  | myosin regulatory light chain interacting protein                                                 | <i>MYLIP</i>            | 29116        |
| 220319_s_at  | myosin regulatory light chain interacting protein                                                 | <i>MYLIP</i>            | 29116        |
| 224206_x_at  | myoneurin                                                                                         | <i>MYNN</i>             | 55892        |
| 218926_at    | myoneurin                                                                                         | <i>MYNN</i>             | 55892        |
| 59375_at     | myosin XVB pseudogene                                                                             | <i>MYO15B</i>           | 80022        |
| 202039_at    | TGFB1-induced anti-apoptotic factor 1 /// myosin XVIII A                                          | <i>MYO18A /// TIAF1</i> | 399687 /// 5 |
| 212364_at    | myosin IB                                                                                         | <i>MYO1B</i>            | 4430         |
| 212365_at    | myosin IB                                                                                         | <i>MYO1B</i>            | 4430         |
| 227761_at    | myosin VA (heavy chain 12, myosin)                                                                | <i>MYO5A</i>            | 4644         |
| 217417_at    | myosin VA (heavy chain 12, myosin)                                                                | <i>MYO5A</i>            | 4644         |
| 204527_at    | myosin VA (heavy chain 12, myosin)                                                                | <i>MYO5A</i>            | 4644         |
| 225299_at    | myosin VB                                                                                         | <i>MYO5B</i>            | 4645         |
| 1570141_at   | myosin VB                                                                                         | <i>MYO5B</i>            | 4645         |
| 217297_s_at  | myosin IXB                                                                                        | <i>MYO9B</i>            | 4650         |
| 208452_x_at  | myosin IXB                                                                                        | <i>MYO9B</i>            | 4650         |
| 225947_at    | myosin head domain containing 1                                                                   | <i>MYOHD1</i>           | 80179        |
| 219728_at    | myotilin                                                                                          | <i>MYOT</i>             | 9499         |
| 225760_at    | myb-like, SWIRM and MPN domains 1                                                                 | <i>MYSM1</i>            | 114803       |
| 237179_at    | myelin transcription factor 1 /// protein-L-isoaspartate (D-aspartate) O-methyltransferase        | <i>MYT1 /// PCMTD2</i>  | 55251        |
| 221867_at    | Nedd4 binding protein 1                                                                           | <i>N4BP1</i>            | 9683         |
| 32069_at     | Nedd4 binding protein 1                                                                           | <i>N4BP1</i>            | 9683         |
| 204601_at    | Nedd4 binding protein 1                                                                           | <i>N4BP1</i>            | 9683         |
| 1554504_at   | N-acetylated alpha-linked acidic dipeptidase 2                                                    | <i>NAALAD2</i>          | 10003        |
| 228424_at    | N-acetylated alpha-linked acidic dipeptidase-like 1                                               | <i>NAALADL1</i>         | 10004        |
| 211139_s_at  | NGFI-A binding protein 1 (EGR1 binding protein 1)                                                 | <i>NAB1</i>             | 4664         |
| 208047_s_at  | NGFI-A binding protein 1 (EGR1 binding protein 1)                                                 | <i>NAB1</i>             | 4664         |
| 200735_x_at  | nascent polypeptide-associated complex alpha subunit                                              | <i>NACA</i>             | 4666         |
| 208635_x_at  | nascent polypeptide-associated complex alpha subunit                                              | <i>NACA</i>             | 4666         |
| 222018_at    | nascent polypeptide-associated complex alpha subunit /// nascent-polypeptide-associated complex 2 | <i>NACA /// NACA2</i>   | 342538 /// 4 |
| 208917_x_at  | NAD kinase                                                                                        | <i>NADK</i>             | 65220        |

|              |                                                                                   |                         |                |
|--------------|-----------------------------------------------------------------------------------|-------------------------|----------------|
| 208918_s_at  | NAD kinase                                                                        | <i>NADK</i>             | 65220          |
| 213607_x_at  | NAD kinase                                                                        | <i>NADK</i>             | 65220          |
| 215159_s_at  | NAD kinase                                                                        | <i>NADK</i>             | 65220          |
| 202943_s_at  | N-acetylgalactosaminidase, alpha-                                                 | <i>NAGA</i>             | 4668           |
| 218231_at    | N-acetylglucosamine kinase                                                        | <i>NAGK</i>             | 55577          |
| 204360_s_at  | N-acetylglucosaminidase, alpha- (Sanfilippo disease IIIB)                         | <i>NAGLU</i>            | 4669           |
| 204861_s_at  | NLR family, apoptosis inhibitory protein /// neuronal apoptosis inhibitory protei | <i>NAIP /// NAIP1B</i>  | 4671 /// 652   |
| 204860_s_at  | NLR family, apoptosis inhibitory protein /// neuronal apoptosis inhibitory protei | <i>NAIP /// NAIP1B</i>  | 4671 /// 652   |
| 220184_at    | Nanog homeobox                                                                    | <i>NANOG</i>            | 79923          |
| 228073_at    | N-acetylneuraminic acid phosphatase                                               | <i>NANP</i>             | 140838         |
| 204528_s_at  | nucleosome assembly protein 1-like 1                                              | <i>NAP1L1</i>           | 4673           |
| 213864_s_at  | nucleosome assembly protein 1-like 1                                              | <i>NAP1L1</i>           | 4673           |
| 208752_x_at  | nucleosome assembly protein 1-like 1                                              | <i>NAP1L1</i>           | 4673           |
| 212967_x_at  | nucleosome assembly protein 1-like 1                                              | <i>NAP1L1</i>           | 4673           |
| 228063_s_at  | nucleosome assembly protein 1-like 5                                              | <i>NAP1L5</i>           | 266812         |
| 228062_at    | nucleosome assembly protein 1-like 5                                              | <i>NAP1L5</i>           | 266812         |
| 206491_s_at  | N-ethylmaleimide-sensitive factor attachment protein, alpha                       | <i>NAPA</i>             | 8775           |
| 208751_at    | N-ethylmaleimide-sensitive factor attachment protein, alpha                       | <i>NAPA</i>             | 8775           |
| 238722_x_at  | N-acyl-phosphatidylethanolamine-hydrolyzing phospholipase D                       | <i>NAPE-PLD</i>         | 222236         |
| 219862_s_at  | nuclear prelamin A recognition factor                                             | <i>NARF</i>             | 26502          |
| 219158_s_at  | NMDA receptor regulated 1                                                         | <i>NARG1</i>            | 80155          |
| 1555450_a_at | NMDA receptor regulated 1-like                                                    | <i>NARG1L</i>           | 79612          |
| 235189_at    | NMDA receptor regulated 2                                                         | <i>NARG2</i>            | 79664          |
| 228960_at    | NMDA receptor regulated 2                                                         | <i>NARG2</i>            | 79664          |
| 218713_at    | NMDA receptor regulated 2                                                         | <i>NARG2</i>            | 79664          |
| 200027_at    | asparaginyl-tRNA synthetase                                                       | <i>NARS</i>             | 4677           |
| 219217_at    | asparaginyl-tRNA synthetase 2, mitochondrial (putative)                           | <i>NARS2</i>            | 79731          |
| 201969_at    | nuclear autoantigenic sperm protein (histone-binding)                             | <i>NASP</i>             | 4678           |
| 222369_at    | N-acetyltransferase 11                                                            | <i>NAT11</i>            | 79829          |
| 218734_at    | N-acetyltransferase 11                                                            | <i>NAT11</i>            | 79829          |
| 225679_at    | N-acetyltransferase 12                                                            | <i>NAT12</i>            | 122830         |
| 222393_s_at  | N-acetyltransferase 13                                                            | <i>NAT13</i>            | 80218          |
| 217745_s_at  | N-acetyltransferase 13                                                            | <i>NAT13</i>            | 80218          |
| 223040_at    | N-acetyltransferase 5                                                             | <i>NAT5</i>             | 51126          |
| 216466_at    | neuron navigator 3                                                                | <i>NAV3</i>             | 89795          |
| 1552658_a_at | neuron navigator 3                                                                | <i>NAV3</i>             | 89795          |
| 226439_s_at  | neurobeachin                                                                      | <i>NBEA</i>             | 26960          |
| 221207_s_at  | neurobeachin                                                                      | <i>NBEA</i>             | 26960          |
| 202905_x_at  | nibrin                                                                            | <i>NBN</i>              | 4683           |
| 217299_s_at  | nibrin                                                                            | <i>NBN</i>              | 4683           |
| 202906_s_at  | nibrin                                                                            | <i>NBN</i>              | 4683           |
| 202907_s_at  | nibrin                                                                            | <i>NBN</i>              | 4683           |
| 242191_at    | neuroblastoma breakpoint family, member 11 /// neuroblastoma breakpoint fa        | <i>NBPF10 /// NBPF1</i> | 100132406 ,    |
| 229447_x_at  | neuroblastoma breakpoint family, member 11                                        | <i>NBPF11</i>           | 100132406 ,    |
| 1558862_at   | neuroblastoma breakpoint family, member 5                                         | <i>NBPF5</i>            | 284610 /// 652 |
| 211685_s_at  | neurocalcin delta                                                                 | <i>NCALD</i>            | 83988          |
| 212843_at    | neural cell adhesion molecule 1                                                   | <i>NCAM1</i>            | 4684           |
| 205669_at    | neural cell adhesion molecule 2                                                   | <i>NCAM2</i>            | 4685           |
| 218663_at    | non-SMC condensin I complex, subunit G                                            | <i>NCAPG</i>            | 64151          |
| 201517_at    | nuclear cap binding protein subunit 2, 20kDa                                      | <i>NCBP2</i>            | 22916          |
| 209949_at    | neutrophil cytosolic factor 2 (65kDa, chronic granulomatous disease, autosomal    | <i>NCF2</i>             | 4688           |
| 207677_s_at  | neutrophil cytosolic factor 4, 40kDa                                              | <i>NCF4</i>             | 4689           |
| 229895_s_at  | NCK adaptor protein 1                                                             | <i>NCK1</i>             | 4690           |
| 217465_at    | NCK-associated protein 1                                                          | <i>NCKAP1</i>           | 10787          |
| 209734_at    | NCK-associated protein 1-like                                                     | <i>NCKAP1L</i>          | 3071           |
| 218697_at    | NCK interacting protein with SH3 domain                                           | <i>NCKIPSD</i>          | 51517          |
| 200610_s_at  | nucleolin                                                                         | <i>NCL</i>              | 4691           |
| 209105_at    | nuclear receptor coactivator 1                                                    | <i>NCOA1</i>            | 8648           |
| 1562439_at   | Nuclear receptor coactivator 3                                                    | <i>NCOA3</i>            | 8202           |
| 209061_at    | nuclear receptor coactivator 3                                                    | <i>NCOA3</i>            | 8202           |
| 207700_s_at  | nuclear receptor coactivator 3                                                    | <i>NCOA3</i>            | 8202           |
| 210774_s_at  | nuclear receptor coactivator 4                                                    | <i>NCOA4</i>            | 8031           |
| 225145_at    | nuclear receptor coactivator 5                                                    | <i>NCOA5</i>            | 57727          |

|              |                                                                              |                |        |
|--------------|------------------------------------------------------------------------------|----------------|--------|
| 207760_s_at  | nuclear receptor co-repressor 2                                              | <i>NCOR2</i>   | 9612   |
| 217045_x_at  | natural cytotoxicity triggering receptor 2                                   | <i>NCR2</i>    | 9436   |
| 208759_at    | nicastatin                                                                   | <i>NCSTN</i>   | 23385  |
| 208093_s_at  | nudE nuclear distribution gene E homolog (A. nidulans)-like 1                | <i>NDEL1</i>   | 81565  |
| 222422_s_at  | Nedd4 family interacting protein 1                                           | <i>NDFIP1</i>  | 80762  |
| 217800_s_at  | Nedd4 family interacting protein 1                                           | <i>NDFIP1</i>  | 80762  |
| 224801_at    | Nedd4 family interacting protein 2                                           | <i>NDFIP2</i>  | 54602  |
| 224802_at    | Nedd4 family interacting protein 2                                           | <i>NDFIP2</i>  | 54602  |
| 224799_at    | Nedd4 family interacting protein 2                                           | <i>NDFIP2</i>  | 54602  |
| 206022_at    | Norrie disease (pseudoglioma)                                                | <i>NDP</i>     | 4693   |
| 200632_s_at  | N-myc downstream regulated gene 1                                            | <i>NDRG1</i>   | 10397  |
| 202607_at    | N-deacetylase/N-sulfotransferase (heparan glucosaminyl) 1                    | <i>NDST1</i>   | 3340   |
| 203916_at    | N-deacetylase/N-sulfotransferase (heparan glucosaminyl) 2                    | <i>NDST2</i>   | 8509   |
| 1570222_at   | N-deacetylase/N-sulfotransferase (heparan glucosaminyl) 4                    | <i>NDST4</i>   | 64579  |
| 202298_at    | NADH dehydrogenase (ubiquinone) 1 alpha subcomplex, 1, 7.5kDa                | <i>NDUFA1</i>  | 4694   |
| 228690_s_at  | NADH dehydrogenase (ubiquinone) 1 alpha subcomplex, 11, 14.7kDa              | <i>NDUFA11</i> | 126328 |
| 217773_s_at  | NADH dehydrogenase (ubiquinone) 1 alpha subcomplex, 4, 9kDa                  | <i>NDUFA4</i>  | 4697   |
| 202077_at    | NADH dehydrogenase (ubiquinone) 1, alpha/beta subcomplex, 1, 8kDa            | <i>NDUFAB1</i> | 4706   |
| 243630_at    | NADH dehydrogenase (ubiquinone) 1 beta subcomplex, 1, 7kDa                   | <i>NDUFB1</i>  | 4707   |
| 223112_s_at  | NADH dehydrogenase (ubiquinone) 1 beta subcomplex, 10, 22kDa                 | <i>NDUFB10</i> | 4716   |
| 218200_s_at  | NADH dehydrogenase (ubiquinone) 1 beta subcomplex, 2, 8kDa                   | <i>NDUFB2</i>  | 4708   |
| 1559042_at   | NADH dehydrogenase (ubiquinone) 1 beta subcomplex, 6, 17kDa                  | <i>NDUFB6</i>  | 4712   |
| 203478_at    | NADH dehydrogenase (ubiquinone) 1, subcomplex unknown, 1, 6kDa               | <i>NDUFC1</i>  | 4717   |
| 218101_s_at  | NADH dehydrogenase (ubiquinone) 1, subcomplex unknown, 2, 14.5kDa            | <i>NDUFC2</i>  | 4718   |
| 209303_at    | NADH dehydrogenase (ubiquinone) Fe-S protein 4, 18kDa (NADH-coenzyme Q r     | <i>NDUFS4</i>  | 4724   |
| 1555057_at   | NADH dehydrogenase (ubiquinone) Fe-S protein 4, 18kDa (NADH-coenzyme Q r     | <i>NDUFS4</i>  | 4724   |
| 203606_at    | NADH dehydrogenase (ubiquinone) Fe-S protein 6, 13kDa (NADH-coenzyme Q r     | <i>NDUFS6</i>  | 4726   |
| 232169_x_at  | NADH dehydrogenase (ubiquinone) Fe-S protein 8, 23kDa (NADH-coenzyme Q r     | <i>NDUFS8</i>  | 4728   |
| 202941_at    | NADH dehydrogenase (ubiquinone) flavoprotein 2, 24kDa                        | <i>NDUFV2</i>  | 4729   |
| 203961_at    | nebullette                                                                   | <i>NEBL</i>    | 10529  |
| 209300_s_at  | NECAP endocytosis associated 1                                               | <i>NECAP1</i>  | 25977  |
| 230123_at    | NECAP endocytosis associated 2                                               | <i>NECAP2</i>  | 55707  |
| 220731_s_at  | NECAP endocytosis associated 2                                               | <i>NECAP2</i>  | 55707  |
| 1560116_a_at | neural precursor cell expressed, developmentally down-regulated 1            | <i>NEDD1</i>   | 121441 |
| 202149_at    | neural precursor cell expressed, developmentally down-regulated 9            | <i>NEDD9</i>   | 4739   |
| 202150_s_at  | neural precursor cell expressed, developmentally down-regulated 9            | <i>NEDD9</i>   | 4739   |
| 221916_at    | neurofilament, light polypeptide 68kDa                                       | <i>NEFL</i>    | 4747   |
| 219502_at    | nei endonuclease VIII-like 3 (E. coli)                                       | <i>NEIL3</i>   | 55247  |
| 216213_at    | NIMA (never in mitosis gene a)-related kinase 1                              | <i>NEK1</i>    | 4750   |
| 213331_s_at  | NIMA (never in mitosis gene a)-related kinase 1                              | <i>NEK1</i>    | 4750   |
| 204641_at    | NIMA (never in mitosis gene a)-related kinase 2                              | <i>NEK2</i>    | 4751   |
| 211080_s_at  | NIMA (never in mitosis gene a)-related kinase 2                              | <i>NEK2</i>    | 4751   |
| 211089_s_at  | NIMA (never in mitosis gene a)-related kinase 3                              | <i>NEK3</i>    | 4752   |
| 212530_at    | NIMA (never in mitosis gene a)-related kinase 7                              | <i>NEK7</i>    | 140609 |
| 203413_at    | NEL-like 2 (chicken)                                                         | <i>NELL2</i>   | 4753   |
| 1552736_a_at | neuropilin (NRP) and tolloid (TLL)-like 1                                    | <i>NETO1</i>   | 81832  |
| 208926_at    | sialidase 1 (lysosomal sialidase)                                            | <i>NEU1</i>    | 4758   |
| 204889_s_at  | neuritized homolog (Drosophila)                                              | <i>NEURL</i>   | 9148   |
| 1552309_a_at | nexilin (F actin binding protein)                                            | <i>NEXN</i>    | 91624  |
| 226103_at    | nexilin (F actin binding protein)                                            | <i>NEXN</i>    | 91624  |
| 211914_x_at  | neurofibromin 1 (neurofibromatosis, von Recklinghausen disease, Watson disea | <i>NF1</i>     | 4763   |
| 211094_s_at  | neurofibromin 1 (neurofibromatosis, von Recklinghausen disease, Watson disea | <i>NF1</i>     | 4763   |
| 224984_at    | nuclear factor of activated T-cells 5, tonicity-responsive                   | <i>NFAT5</i>   | 10725  |
| 215092_s_at  | nuclear factor of activated T-cells 5, tonicity-responsive                   | <i>NFAT5</i>   | 10725  |
| 211105_s_at  | nuclear factor of activated T-cells, cytoplasmic, calcineurin-dependent 1    | <i>NFATC1</i>  | 4772   |
| 210162_s_at  | nuclear factor of activated T-cells, cytoplasmic, calcineurin-dependent 1    | <i>NFATC1</i>  | 4772   |
| 226991_at    | Nuclear factor of activated T-cells, cytoplasmic, calcineurin-dependent 2    | <i>NFATC2</i>  | 4773   |
| 210555_s_at  | nuclear factor of activated T-cells, cytoplasmic, calcineurin-dependent 3    | <i>NFATC3</i>  | 4775   |
| 210556_at    | nuclear factor of activated T-cells, cytoplasmic, calcineurin-dependent 3    | <i>NFATC3</i>  | 4775   |
| 207416_s_at  | nuclear factor of activated T-cells, cytoplasmic, calcineurin-dependent 3    | <i>NFATC3</i>  | 4775   |
| 209930_s_at  | nuclear factor (erythroid-derived 2), 45kDa                                  | <i>NFE2</i>    | 4778   |
| 200758_s_at  | nuclear factor (erythroid-derived 2)-like 1                                  | <i>NFE2L1</i>  | 4779   |
| 201146_at    | nuclear factor (erythroid-derived 2)-like 2                                  | <i>NFE2L2</i>  | 4780   |

|              |                                                                                       |                  |        |
|--------------|---------------------------------------------------------------------------------------|------------------|--------|
| 1567013_at   | nuclear factor (erythroid-derived 2)-like 2                                           | <i>NFE2L2</i>    | 4780   |
| 1560527_at   | transcription factor NF-E4                                                            | <i>NF-E4</i>     | 58160  |
| 224975_at    | nuclear factor I/A                                                                    | <i>NFIA</i>      | 4774   |
| 224970_at    | nuclear factor I/A                                                                    | <i>NFIA</i>      | 4774   |
| 209290_s_at  | nuclear factor I/B                                                                    | <i>NFIB</i>      | 4781   |
| 209289_at    | nuclear factor I/B                                                                    | <i>NFIB</i>      | 4781   |
| 203574_at    | nuclear factor, interleukin 3 regulated                                               | <i>NFIL3</i>     | 4783   |
| 209239_at    | nuclear factor of kappa light polypeptide gene enhancer in B-cells 1 (p105)           | <i>NFKB1</i>     | 4790   |
| 207535_s_at  | nuclear factor of kappa light polypeptide gene enhancer in B-cells 2 (p49/p100)       | <i>NFKB2</i>     | 4791   |
| 209636_at    | nuclear factor of kappa light polypeptide gene enhancer in B-cells 2 (p49/p100)       | <i>NFKB2</i>     | 4791   |
| 201502_s_at  | nuclear factor of kappa light polypeptide gene enhancer in B-cells inhibitor, alpha   | <i>NFKBIA</i>    | 4792   |
| 214062_x_at  | nuclear factor of kappa light polypeptide gene enhancer in B-cells inhibitor, beta    | <i>NFKBIB</i>    | 4793   |
| 203927_at    | nuclear factor of kappa light polypeptide gene enhancer in B-cells inhibitor, epsilon | <i>NFKBIE</i>    | 4794   |
| 223217_s_at  | nuclear factor of kappa light polypeptide gene enhancer in B-cells inhibitor, zeta    | <i>NFKBIZ</i>    | 64332  |
| 223218_s_at  | nuclear factor of kappa light polypeptide gene enhancer in B-cells inhibitor, zeta    | <i>NFKBIZ</i>    | 64332  |
| 1556153_s_at | Nuclear factor of kappa light polypeptide gene enhancer in B-cells inhibitor, zeta    | <i>NFKBIZ</i>    | 64332  |
| 213028_at    | nuclear factor related to kappaB binding protein                                      | <i>NFRKB</i>     | 4798   |
| 237210_at    | nuclear factor related to kappaB binding protein                                      | <i>NFRKB</i>     | 4798   |
| 218455_at    | NFS1 nitrogen fixation 1 homolog (S. cerevisiae)                                      | <i>NFS1</i>      | 9054   |
| 218946_at    | NFU1 iron-sulfur cluster scaffold homolog (S. cerevisiae)                             | <i>NFU1</i>      | 27247  |
| 1553103_at   | nuclear transcription factor, X-box binding 1                                         | <i>NFX1</i>      | 4799   |
| 202584_at    | nuclear transcription factor, X-box binding 1                                         | <i>NFX1</i>      | 4799   |
| 227220_at    | nuclear transcription factor, X-box binding-like 1                                    | <i>NFXL1</i>     | 152518 |
| 204109_s_at  | nuclear transcription factor Y, alpha                                                 | <i>NFYA</i>      | 4800   |
| 204107_at    | nuclear transcription factor Y, alpha                                                 | <i>NFYA</i>      | 4800   |
| 215720_s_at  | nuclear transcription factor Y, alpha                                                 | <i>NFYA</i>      | 4800   |
| 218127_at    | nuclear transcription factor Y, beta                                                  | <i>NFYB</i>      | 4801   |
| 238231_at    | Nuclear transcription factor Y, gamma                                                 | <i>NFYC</i>      | 4802   |
| 211251_x_at  | nuclear transcription factor Y, gamma                                                 | <i>NFYC</i>      | 4802   |
| 202215_s_at  | nuclear transcription factor Y, gamma                                                 | <i>NFYC</i>      | 4802   |
| 211797_s_at  | nuclear transcription factor Y, gamma                                                 | <i>NFYC</i>      | 4802   |
| 207492_at    | N-glycanase 1                                                                         | <i>NGLY1</i>     | 55768  |
| 220742_s_at  | N-glycanase 1                                                                         | <i>NGLY1</i>     | 55768  |
| 1553633_s_at | Na <sup>+</sup> /H <sup>+</sup> exchanger domain containing 1                         | <i>NHEDC1</i>    | 150159 |
| 1555141_a_at | Na <sup>+</sup> /H <sup>+</sup> exchanger domain containing 1                         | <i>NHEDC1</i>    | 150159 |
| 229491_at    | Na <sup>+</sup> /H <sup>+</sup> exchanger domain containing 2                         | <i>NHEDC2</i>    | 133308 |
| 215228_at    | nescient helix loop helix 2                                                           | <i>NHLH2</i>     | 4808   |
| 219353_at    | NHL repeat containing 2                                                               | <i>NHLRC2</i>    | 374354 |
| 228933_at    | Nance-Horan syndrome (congenital cataracts and dental anomalies)                      | <i>NHS</i>       | 4810   |
| 242800_at    | Nance-Horan syndrome (congenital cataracts and dental anomalies)                      | <i>NHS</i>       | 4810   |
| 203045_at    | ninjurin 1                                                                            | <i>NINJ1</i>     | 4814   |
| 219594_at    | ninjurin 2                                                                            | <i>NINJ2</i>     | 4815   |
| 222460_s_at  | NEFA-interacting nuclear protein NIP30                                                | <i>NIP30</i>     | 80011  |
| 219031_s_at  | nuclear import 7 homolog (S. cerevisiae)                                              | <i>NIP7</i>      | 51388  |
| 207108_s_at  | Nipped-B homolog (Drosophila)                                                         | <i>NIPBL</i>     | 25836  |
| 224436_s_at  | nipsnap homolog 3A (C. elegans)                                                       | <i>NIPSNAP3A</i> | 25934  |
| 221104_s_at  | nipsnap homolog 3B (C. elegans)                                                       | <i>NIPSNAP3B</i> | 55335  |
| 201591_s_at  | nischarin                                                                             | <i>NISCH</i>     | 11188  |
| 213915_at    | natural killer cell group 7 sequence                                                  | <i>NKG7</i>      | 4818   |
| 225930_at    | NFKB inhibitor interacting Ras-like 1                                                 | <i>NKIRAS1</i>   | 28512  |
| 218240_at    | NFKB inhibitor interacting Ras-like 2                                                 | <i>NKIRAS2</i>   | 28511  |
| 1570342_at   | natural killer-tumor recognition sequence                                             | <i>NKTR</i>      | 4820   |
| 215339_at    | natural killer-tumor recognition sequence                                             | <i>NKTR</i>      | 4820   |
| 209706_at    | NK3 homeobox 1                                                                        | <i>NKX3-1</i>    | 4824   |
| 205893_at    | neuroligin 1                                                                          | <i>NLGN1</i>     | 22871  |
| 218318_s_at  | nemo-like kinase                                                                      | <i>NLK</i>       | 51701  |
| 222589_at    | nemo-like kinase                                                                      | <i>NLK</i>       | 51701  |
| 238624_at    | Nemo-like kinase                                                                      | <i>NLK</i>       | ---    |
| 234762_x_at  | Neurolysin (metallopeptidase M3 family)                                               | <i>NLN</i>       | 57486  |
| 225943_at    | neurolysin (metallopeptidase M3 family)                                               | <i>NLN</i>       | 57486  |
| 236295_s_at  | NLR family, CARD domain containing 3                                                  | <i>NLRC3</i>     | 197358 |
| 226474_at    | NLR family, CARD domain containing 5                                                  | <i>NLRC5</i>     | 84166  |
| 211824_x_at  | NLR family, pyrin domain containing 1                                                 | <i>NLRP1</i>     | 22861  |

|              |                                                                                    |                               |              |
|--------------|------------------------------------------------------------------------------------|-------------------------------|--------------|
| 211822_s_at  | NLR family, pyrin domain containing 1                                              | <i>NLRP1</i>                  | 22861        |
| 210113_s_at  | NLR family, pyrin domain containing 1                                              | <i>NLRP1</i>                  | 22861        |
| 223944_at    | NLR family, pyrin domain containing 12                                             | <i>NLRP12</i>                 | 91662        |
| 1554952_s_at | NLR family, pyrin domain containing 12                                             | <i>NLRP12</i>                 | 91662        |
| 207075_at    | NLR family, pyrin domain containing 3                                              | <i>NLRP3</i>                  | 114548       |
| 216015_s_at  | NLR family, pyrin domain containing 3                                              | <i>NLRP3</i>                  | 114548       |
| 1553695_a_at | NLR family member X1                                                               | <i>NLRX1</i>                  | 79671        |
| 201268_at    | non-metastatic cells 2, protein (NM23B) expressed in /// NM23-LV                   | <i>NME1-NME2</i> /// N        | 4831 /// 654 |
| 206197_at    | non-metastatic cells 5, protein expressed in (nucleoside-diphosphate kinase)       | <i>NME5</i>                   | 8382         |
| 205851_at    | non-metastatic cells 6, protein expressed in (nucleoside-diphosphate kinase)       | <i>NME6</i>                   | 10201        |
| 201158_at    | N-myristoyltransferase 1                                                           | <i>NMT1</i>                   | 4836         |
| 205006_s_at  | N-myristoyltransferase 2                                                           | <i>NMT2</i>                   | 9397         |
| 215743_at    | N-myristoyltransferase 2                                                           | <i>NMT2</i>                   | 9397         |
| 205005_s_at  | N-myristoyltransferase 2                                                           | <i>NMT2</i>                   | 9397         |
| 215069_at    | N-myristoyltransferase 2                                                           | <i>NMT2</i>                   | 9397         |
| 202783_at    | nicotinamide nucleotide transhydrogenase                                           | <i>NNT</i>                    | 23530        |
| 202784_s_at  | nicotinamide nucleotide transhydrogenase                                           | <i>NNT</i>                    | 23530        |
| 218889_at    | nucleolar complex associated 3 homolog ( <i>S. cerevisiae</i> )                    | <i>NOC3L</i>                  | 64318        |
| 224190_x_at  | nucleotide-binding oligomerization domain containing 1                             | <i>NOD1</i>                   | 10392        |
| 220066_at    | nucleotide-binding oligomerization domain containing 2                             | <i>NOD2</i>                   | 64127        |
| 221970_s_at  | nucleolar protein 11                                                               | <i>NOL11</i>                  | 25926        |
| 238605_at    | nucleolar protein 4                                                                | <i>NOL4</i>                   | 8715         |
| 200875_s_at  | nucleolar protein 5A (56kDa with KKE/D repeat)                                     | <i>NOL5A</i>                  | 10528        |
| 213838_at    | nucleolar protein 7, 27kDa                                                         | <i>NOL7</i>                   | 51406        |
| 218754_at    | nucleolar protein 9                                                                | <i>NOL9</i>                   | 79707        |
| 1554082_a_at | nucleolar protein 9                                                                | <i>NOL9</i>                   | 79707        |
| 219110_at    | nucleolar protein family A, member 1 (H/ACA small nucleolar RNPs)                  | <i>NOLA1</i>                  | 54433        |
| 217962_at    | nucleolar protein family A, member 3 (H/ACA small nucleolar RNPs)                  | <i>NOLA3</i>                  | 55505        |
| 211951_at    | nucleolar and coiled-body phosphoprotein 1                                         | <i>NOLC1</i>                  | 9221         |
| 210470_x_at  | non-POU domain containing, octamer-binding                                         | <i>NONO</i>                   | 4841         |
| 208698_s_at  | non-POU domain containing, octamer-binding                                         | <i>NONO</i>                   | 4841         |
| 1560974_s_at | nitric oxide synthase 1 (neuronal)                                                 | <i>NOS1</i>                   | 4842         |
| 1560703_at   | Nitric oxide synthase 2A (inducible, hepatocytes)                                  | <i>NOS2A</i>                  | 201229       |
| 218902_at    | Notch homolog 1, translocation-associated ( <i>Drosophila</i> )                    | <i>NOTCH1</i>                 | 4851         |
| 212377_s_at  | Notch homolog 2 ( <i>Drosophila</i> )                                              | <i>NOTCH2</i>                 | 4853         |
| 210756_s_at  | Notch homolog 2 ( <i>Drosophila</i> )                                              | <i>NOTCH2</i>                 | 4853         |
| 227067_x_at  | Notch homolog 2 ( <i>Drosophila</i> ) N-terminal like                              | <i>NOTCH2NL</i>               | 388677       |
| 205247_at    | Notch homolog 4 ( <i>Drosophila</i> )                                              | <i>NOTCH4</i>                 | 4855         |
| 214321_at    | nephroblastoma overexpressed gene                                                  | <i>NOV</i>                    | 4856         |
| 204501_at    | nephroblastoma overexpressed gene                                                  | <i>NOV</i>                    | 4856         |
| 219773_at    | NADPH oxidase 4                                                                    | <i>NOX4</i>                   | 50507        |
| 222652_s_at  | cytokine-like nuclear factor n-pac                                                 | <i>N-PAC</i>                  | 84656        |
| 212414_s_at  | septin 6 /// cytokine-like nuclear factor n-pac                                    | <i>N-PAC</i> /// <i>SEPT6</i> | 23157 /// 84 |
| 232158_x_at  | NIPA-like domain containing 1                                                      | <i>NPAL1</i>                  | 152519       |
| 229735_s_at  | NIPA-like domain containing 3                                                      | <i>NPAL3</i>                  | ---          |
| 211585_at    | nuclear protein, ataxia-telangiectasia locus                                       | <i>NPAT</i>                   | 4863         |
| 209798_at    | nuclear protein, ataxia-telangiectasia locus                                       | <i>NPAT</i>                   | 4863         |
| 211584_s_at  | nuclear protein, ataxia-telangiectasia locus                                       | <i>NPAT</i>                   | 4863         |
| 202679_at    | Niemann-Pick disease, type C1                                                      | <i>NPC1</i>                   | 4864         |
| 200701_at    | Niemann-Pick disease, type C2                                                      | <i>NPC2</i>                   | 10577        |
| 235033_at    | Aminopeptidase-like 1                                                              | <i>NPEPL1</i>                 | 79716        |
| 218821_at    | aminopeptidase-like 1                                                              | <i>NPEPL1</i>                 | 79716        |
| 242612_at    | aminopeptidase puromycin sensitive                                                 | <i>NPEPPS</i>                 | ---          |
| 201455_s_at  | aminopeptidase puromycin sensitive                                                 | <i>NPEPPS</i>                 | 9520         |
| 201454_s_at  | aminopeptidase puromycin sensitive                                                 | <i>NPEPPS</i>                 | 9520         |
| 213471_at    | nephronophthisis 4                                                                 | <i>NPHP4</i>                  | 261734       |
| 223405_at    | N-acetylneuraminatase pyruvate lyase (dihydrodipicolinate synthase)                | <i>NPL</i>                    | 80896        |
| 240440_at    | N-acetylneuraminatase pyruvate lyase (dihydrodipicolinate synthase)                | <i>NPL</i>                    | 80896        |
| 221210_s_at  | N-acetylneuraminatase pyruvate lyase (dihydrodipicolinate synthase)                | <i>NPL</i>                    | 80896        |
| 221923_s_at  | nucleophosmin (nucleolar phosphoprotein B23, numatrin)                             | <i>NPM1</i>                   | 4869         |
| 221691_x_at  | nucleophosmin (nucleolar phosphoprotein B23, numatrin)                             | <i>NPM1</i>                   | 4869         |
| 202228_s_at  | neuroplastin                                                                       | <i>NPTN</i>                   | 27020        |
| 31637_s_at   | thyroid hormone receptor, alpha (erythroblastic leukemia viral (v-erb-a) oncogene) | <i>NR1D1</i> /// <i>THRA</i>  | 7067 /// 95; |



|             |                                                                                    |                              |              |
|-------------|------------------------------------------------------------------------------------|------------------------------|--------------|
| 204760_s_at | thyroid hormone receptor, alpha (erythroblastic leukemia viral (v-erb-a) oncogene) | <i>NR1D1</i> /// <i>THRA</i> | 7067 /// 95; |
| 225768_at   | nuclear receptor subfamily 1, group D, member 2                                    | <i>NR1D2</i>                 | 9975         |
| 209750_at   | nuclear receptor subfamily 1, group D, member 2                                    | <i>NR1D2</i>                 | 9975         |
| 218215_s_at | nuclear receptor subfamily 1, group H, member 2                                    | <i>NR1H2</i>                 | 7376         |
| 204791_at   | nuclear receptor subfamily 2, group C, member 1                                    | <i>NR2C1</i>                 | 7181         |
| 210531_at   | nuclear receptor subfamily 2, group C, member 1                                    | <i>NR2C1</i>                 | 7181         |
| 201866_s_at | nuclear receptor subfamily 3, group C, member 1 (glucocorticoid receptor)          | <i>NR3C1</i>                 | 2908         |
| 216321_s_at | nuclear receptor subfamily 3, group C, member 1 (glucocorticoid receptor)          | <i>NR3C1</i>                 | 2908         |
| 201865_x_at | nuclear receptor subfamily 3, group C, member 1 (glucocorticoid receptor)          | <i>NR3C1</i>                 | 2908         |
| 211671_s_at | nuclear receptor subfamily 3, group C, member 1 (glucocorticoid receptor)          | <i>NR3C1</i>                 | 2908         |
| 202340_x_at | nuclear receptor subfamily 4, group A, member 1                                    | <i>NR4A1</i>                 | 3164         |
| 207978_s_at | nuclear receptor subfamily 4, group A, member 3                                    | <i>NR4A3</i>                 | 8013         |
| 209959_at   | nuclear receptor subfamily 4, group A, member 3                                    | <i>NR4A3</i>                 | 8013         |
| 216979_at   | nuclear receptor subfamily 4, group A, member 3                                    | <i>NR4A3</i>                 | 8013         |
| 1560469_at  | nuclear receptor subfamily 5, group A, member 2                                    | <i>NR5A2</i>                 | 2494         |
| 211402_x_at | nuclear receptor subfamily 6, group A, member 1                                    | <i>NR6A1</i>                 | 2649         |
| 221803_s_at | nuclear receptor binding factor 2                                                  | <i>NRBF2</i>                 | 29982        |
| 223650_s_at | nuclear receptor binding factor 2                                                  | <i>NRBF2</i>                 | 29982        |
| 217765_at   | nuclear receptor binding protein 1                                                 | <i>NRBP1</i>                 | 29959        |
| 202600_s_at | nuclear receptor interacting protein 1                                             | <i>NRIP1</i>                 | 8204         |
| 202599_s_at | nuclear receptor interacting protein 1                                             | <i>NRIP1</i>                 | 8204         |
| 209914_s_at | neurexin 1                                                                         | <i>NRXN1</i>                 | 9378         |
| 221238_at   | nucleosomal binding protein 1                                                      | <i>NSBP1</i>                 | 79366        |
| 221606_s_at | nucleosomal binding protein 1                                                      | <i>NSBP1</i>                 | 79366        |
| 217831_s_at | NSFL1 (p97) cofactor (p47)                                                         | <i>NSFL1C</i>                | 55968        |
| 209484_s_at | NSL1, MIND kinetochore complex component, homolog ( <i>S. cerevisiae</i> )         | <i>NSL1</i>                  | 25936        |
| 232148_at   | Neutral sphingomyelinase (N-SMase) activation associated factor                    | <i>NSMAF</i>                 | 8439         |
| 203269_at   | neutral sphingomyelinase (N-SMase) activation associated factor                    | <i>NSMAF</i>                 | 8439         |
| 232149_s_at | neutral sphingomyelinase (N-SMase) activation associated factor                    | <i>NSMAF</i>                 | 8439         |
| 226536_at   | non-SMC element 2, MMS21 homolog ( <i>S. cerevisiae</i> )                          | <i>NSMCE2</i>                | 286053       |
| 226351_at   | NOL1/NOP2/Sun domain family, member 4                                              | <i>NSUN4</i>                 | 387338       |
| 243100_at   | 5'-nucleotidase, cytosolic IB                                                      | <i>NT5C1B</i>                | 93034        |
| 223178_s_at | 5'-nucleotidase domain containing 1                                                | <i>NT5DC1</i>                | 221294       |
| 203939_at   | 5'-nucleotidase, ecto (CD73)                                                       | <i>NT5E</i>                  | 4907         |
| 217480_x_at | Netrin 2-like (chicken)                                                            | <i>NTN2L</i>                 | 339562       |
| 233072_at   | netrin G2                                                                          | <i>NTNG2</i>                 | 84628        |
| 207152_at   | neurotrophic tyrosine kinase, receptor, type 2                                     | <i>NTRK2</i>                 | 4915         |
| 217033_x_at | neurotrophic tyrosine kinase, receptor, type 3                                     | <i>NTRK3</i>                 | 4916         |
| 206462_s_at | neurotrophic tyrosine kinase, receptor, type 3                                     | <i>NTRK3</i>                 | 4916         |
| 217377_x_at | neurotrophic tyrosine kinase, receptor, type 3                                     | <i>NTRK3</i>                 | 4916         |
| 203978_at   | nucleotide binding protein 1 (MinD homolog, <i>E. coli</i> )                       | <i>NUBP1</i>                 | 4682         |
| 200646_s_at | nucleobindin 1                                                                     | <i>NUCB1</i>                 | 4924         |
| 226880_at   | nuclear casein kinase and cyclin-dependent kinase substrate 1                      | <i>NUCKS1</i>                | 64710        |
| 217802_s_at | nuclear casein kinase and cyclin-dependent kinase substrate 1                      | <i>NUCKS1</i>                | 64710        |
| 229353_s_at | nuclear casein kinase and cyclin-dependent kinase substrate 1                      | <i>NUCKS1</i>                | 64710        |
| 224581_s_at | nuclear casein kinase and cyclin-dependent kinase substrate 1                      | <i>NUCKS1</i>                | 64710        |
| 226642_s_at | NudC domain containing 2                                                           | <i>NUDCD2</i>                | 134492       |
| 201270_x_at | NudC domain containing 3                                                           | <i>NUDCD3</i>                | 23386        |
| 241596_at   | nudix (nucleoside diphosphate linked moiety X)-type motif 10                       | <i>NUDT10</i>                | 170685       |
| 241598_at   | Nudix (nucleoside diphosphate linked moiety X)-type motif 10                       | <i>NUDT10</i>                | 170685       |
| 219855_at   | nudix (nucleoside diphosphate linked moiety X)-type motif 11                       | <i>NUDT11</i>                | 55190        |
| 223535_at   | nudix (nucleoside diphosphate linked moiety X)-type motif 12                       | <i>NUDT12</i>                | 83594        |
| 224477_s_at | nudix (nucleoside diphosphate linked moiety X)-type motif 16-like 1                | <i>NUDT16L1</i>              | 84309        |
| 232251_at   | nudix (nucleoside diphosphate linked moiety X)-type motif 16 pseudogene            | <i>NUDT16P</i>               | 152195       |
| 224830_at   | nudix (nucleoside diphosphate linked moiety X)-type motif 21                       | <i>NUDT21</i>                | 11051        |
| 213461_at   | nudix (nucleoside diphosphate linked moiety X)-type motif 21                       | <i>NUDT21</i>                | 11051        |
| 224464_s_at | nudix (nucleoside diphosphate linked moiety X)-type motif 22                       | <i>NUDT22</i>                | 84304        |
| 212183_at   | nudix (nucleoside diphosphate linked moiety X)-type motif 4                        | <i>NUDT4</i>                 | 11163 /// 4  |
| 222824_at   | nudix (nucleoside diphosphate linked moiety X)-type motif 5                        | <i>NUDT5</i>                 | ---          |
| 223100_s_at | nudix (nucleoside diphosphate linked moiety X)-type motif 5                        | <i>NUDT5</i>                 | 11164        |
| 205136_s_at | nuclear fragile X mental retardation protein interacting protein 1                 | <i>NUFIP1</i>                | 26747        |
| 235539_at   | Nuclear mitotic apparatus protein 1                                                | <i>NUMA1</i>                 | 4926         |
| 214251_s_at | nuclear mitotic apparatus protein 1                                                | <i>NUMA1</i>                 | 4926         |

|              |                                                                                    |                                         |           |
|--------------|------------------------------------------------------------------------------------|-----------------------------------------|-----------|
| 209073_s_at  | numb homolog (Drosophila)                                                          | <i>NUMB</i>                             | 8650      |
| 207545_s_at  | numb homolog (Drosophila)                                                          | <i>NUMB</i>                             | 8650      |
| 242195_x_at  | numb homolog (Drosophila)-like                                                     | <i>NUMBL</i>                            | 9253      |
| 218768_at    | nucleoporin 107kDa                                                                 | <i>NUP107</i>                           | 57122     |
| 212709_at    | nucleoporin 160kDa                                                                 | <i>NUP160</i>                           | 23279     |
| 212247_at    | nucleoporin 205kDa                                                                 | <i>NUP205</i>                           | 23165     |
| 212316_at    | nucleoporin 210kDa                                                                 | <i>NUP210</i>                           | 23225     |
| 202155_s_at  | nucleoporin 214kDa                                                                 | <i>NUP214</i>                           | 8021      |
| 228902_at    | nucleoporin 214kDa                                                                 | <i>NUP214</i>                           | 8021      |
| 225470_at    | nucleoporin 35kDa                                                                  | <i>NUP35</i>                            | 129401    |
| 218622_at    | nucleoporin 37kDa                                                                  | <i>NUP37</i>                            | 79023     |
| 219007_at    | nucleoporin 43kDa                                                                  | <i>NUP43</i>                            | 348995    |
| 218294_s_at  | nucleoporin 50kDa                                                                  | <i>NUP50</i>                            | 10762     |
| 202153_s_at  | nucleoporin 62kDa                                                                  | <i>NUP62</i>                            | 23636     |
| 220520_s_at  | nucleoporin 62kDa C-terminal like                                                  | <i>NUP62CL</i>                          | 54830     |
| 232960_at    | nucleoporin 62kDa C-terminal like                                                  | <i>NUP62CL</i>                          | 54830     |
| 202900_s_at  | nucleoporin 88kDa                                                                  | <i>NUP88</i>                            | 4927      |
| 202188_at    | nucleoporin 93kDa                                                                  | <i>NUP93</i>                            | 9688      |
| 203195_s_at  | nucleoporin 98kDa                                                                  | <i>NUP98</i>                            | 4928      |
| 203194_s_at  | nucleoporin 98kDa                                                                  | <i>NUP98</i>                            | 4928      |
| 210793_s_at  | nucleoporin 98kDa                                                                  | <i>NUP98</i>                            | 4928      |
| 1555789_s_at | nucleoporin 98kDa /// PHD finger protein 23                                        | <i>NUP98 /// PHF23</i>                  | 79142     |
| 204435_at    | nucleoporin like 1                                                                 | <i>NUPL1</i>                            | 9818      |
| 225047_at    | nucleoporin like 1                                                                 | <i>NUPL1</i>                            | 9818      |
| 223984_s_at  | nucleoporin like 1                                                                 | <i>NUPL1</i>                            | 9818      |
| 241425_at    | Nucleoporin like 1                                                                 | <i>NUPL1</i>                            | 9818      |
| 209230_s_at  | nuclear protein 1                                                                  | <i>NUPR1</i>                            | 26471     |
| 218039_at    | nucleolar and spindle associated protein 1                                         | <i>NUSAP1</i>                           | 51203     |
| 208922_s_at  | nuclear RNA export factor 1                                                        | <i>NXF1</i>                             | 10482     |
| 218708_at    | NTF2-like export factor 1                                                          | <i>NXT1</i>                             | 29107     |
| 1553570_x_at | phosphatidylinositol glycan anchor biosynthesis, class F /// zinc finger, FYVE don | <i>OAF /// PIGF /// ZF 4513 /// 64:</i> |           |
| 1553569_at   | phosphatidylinositol glycan anchor biosynthesis, class F /// zinc finger, FYVE don | <i>OAF /// PIGF /// ZF 4513 /// 64:</i> |           |
| 202869_at    | 2',5'-oligoadenylate synthetase 1, 40/46kDa                                        | <i>OAS1</i>                             | 4938      |
| 205552_s_at  | 2',5'-oligoadenylate synthetase 1, 40/46kDa                                        | <i>OAS1</i>                             | 4938      |
| 204972_at    | 2'-5'-oligoadenylate synthetase 2, 69/71kDa                                        | <i>OAS2</i>                             | 4939      |
| 228607_at    | 2'-5'-oligoadenylate synthetase 2, 69/71kDa                                        | <i>OAS2</i>                             | 4939      |
| 218400_at    | 2'-5'-oligoadenylate synthetase 3, 100kDa                                          | <i>OAS3</i>                             | 4940      |
| 210797_s_at  | 2'-5'-oligoadenylate synthetase-like                                               | <i>OASL</i>                             | 8638      |
| 205660_at    | 2'-5'-oligoadenylate synthetase-like                                               | <i>OASL</i>                             | 8638      |
| 219100_at    | oligonucleotide/oligosaccharide-binding fold containing 1                          | <i>OBFC1</i>                            | 79991     |
| 219334_s_at  | oligonucleotide/oligosaccharide-binding fold containing 2A                         | <i>OBFC2A</i>                           | 64859     |
| 239748_x_at  | OCIA domain containing 1                                                           | <i>OCIAD1</i>                           | 54940     |
| 208274_at    | oculomedin                                                                         | <i>OCLM</i>                             | 10896     |
| 1565026_a_at | orofacial cleft 1 candidate 1                                                      | <i>OFCC1</i>                            | 266553    |
| 241751_at    | oral-facial-digital syndrome 1                                                     | <i>OFD1</i>                             | 8481      |
| 1554152_a_at | oxoglutarate (alpha-ketoglutarate) dehydrogenase (lipoamide)                       | <i>OGDH</i>                             | 4967      |
| 241739_at    | 2-oxoglutarate and iron-dependent oxygenase domain containing 1                    | <i>OGFOD1</i>                           | 55239     |
| 225110_at    | 2-oxoglutarate and iron-dependent oxygenase domain containing 1                    | <i>OGFOD1</i>                           | 55239     |
| 221090_s_at  | 2-oxoglutarate and iron-dependent oxygenase domain containing 1                    | <i>OGFOD1</i>                           | 55239     |
| 225106_s_at  | 2-oxoglutarate and iron-dependent oxygenase domain containing 1                    | <i>OGFOD1</i>                           | 55239     |
| 202841_x_at  | opioid growth factor receptor                                                      | <i>OGFR</i>                             | 11054     |
| 219582_at    | opioid growth factor receptor-like 1                                               | <i>OGFRL1</i>                           | 79627     |
| 205760_s_at  | 8-oxoguanine DNA glycosylase                                                       | <i>OGG1</i>                             | 4968      |
| 212307_s_at  | O-linked N-acetylglucosamine (GlcNAc) transferase (UDP-N-acetylglucosamine:~       | <i>OGT</i>                              | 8473      |
| 229787_s_at  | O-linked N-acetylglucosamine (GlcNAc) transferase (UDP-N-acetylglucosamine:~       | <i>OGT</i>                              | ---       |
| 209240_at    | O-linked N-acetylglucosamine (GlcNAc) transferase (UDP-N-acetylglucosamine:~       | <i>OGT</i>                              | 8473      |
| 207564_x_at  | O-linked N-acetylglucosamine (GlcNAc) transferase (UDP-N-acetylglucosamine:~       | <i>OGT</i>                              | 8473      |
| 219293_s_at  | Obg-like ATPase 1                                                                  | <i>OLA1</i>                             | 29789     |
| 219975_x_at  | oleoyl-ACP hydrolase                                                               | <i>OLAH</i>                             | 55301     |
| 232586_x_at  | CDNA FLJ11504 fis, clone HEMBA1002119                                              | <i>olfactory receptor,</i>              | 100133315 |
| 1554524_a_at | olfactomedin 3                                                                     | <i>OLFM3</i>                            | 118427    |
| 1554526_at   | olfactomedin 3                                                                     | <i>OLFM3</i>                            | 118427    |
| 212768_s_at  | olfactomedin 4                                                                     | <i>OLFM4</i>                            | 10562     |

|              |                                                                  |                      |               |
|--------------|------------------------------------------------------------------|----------------------|---------------|
| 228170_at    | oligodendrocyte transcription factor 1                           | <i>OLIG1</i>         | 116448        |
| 210004_at    | oxidized low density lipoprotein (lectin-like) receptor 1        | <i>OLR1</i>          | 4973          |
| 207093_s_at  | oligodendrocyte myelin glycoprotein                              | <i>OMG</i>           | 4974          |
| 241027_at    | optic atrophy 1 (autosomal dominant)                             | <i>OPA1</i>          | 4976          |
| 212213_x_at  | optic atrophy 1 (autosomal dominant)                             | <i>OPA1</i>          | 4976          |
| 214306_at    | optic atrophy 1 (autosomal dominant)                             | <i>OPA1</i>          | 4976          |
| 206323_x_at  | oligophrenin 1                                                   | <i>OPHN1</i>         | 4983          |
| 222025_s_at  | 5-oxoprolinase (ATP-hydrolysing)                                 | <i>OPLAH</i>         | 26873         |
| 219032_x_at  | opsin 3 (encephalopsin, panopsin)                                | <i>OPN3</i>          | 23596         |
| 233657_at    | opsin 5                                                          | <i>OPN5</i>          | 221391        |
| 221344_at    | olfactory receptor, family 12, subfamily D, member 2             | <i>OR12D2</i>        | 26529         |
| 216408_at    | olfactory receptor, family 2, subfamily B, member 2              | <i>OR2B2</i>         | 81697         |
| 1556986_at   | olfactory receptor, family 2, subfamily H, member 1              | <i>OR2H1</i>         | 26716         |
| 221451_s_at  | olfactory receptor, family 2, subfamily W, member 1              | <i>OR2W1</i>         | 26692         |
| 234486_at    | olfactory receptor, family 51, subfamily B, member 2             | <i>OR51B2</i>        | 79345         |
| 232829_at    | olfactory receptor, family 52, subfamily K, member 3 pseudogene  | <i>OR52K3P</i>       | 390035        |
| 208521_at    | olfactory receptor, family 5, subfamily I, member 1              | <i>OR5I1</i>         | 10798         |
| 1567288_at   | olfactory receptor, family 5, subfamily K, member 1              | <i>OR5K1</i>         | 26339         |
| 1566956_at   | olfactory receptor, family 7, subfamily E, member 104 pseudogene | <i>OR7E104P</i>      | 81137         |
| 215463_at    | olfactory receptor, family 7, subfamily E, member 24             | <i>OR7E24</i>        | 26648         |
| 217499_x_at  | olfactory receptor, family 7, subfamily E, member 37 pseudogene  | <i>OR7E37P</i>       | 26636         |
| 221864_at    | ORAI calcium release-activated calcium modulator 3               | <i>ORAI3</i>         | 93129         |
| 204853_at    | origin recognition complex, subunit 2-like (yeast)               | <i>ORC2L</i>         | 4999          |
| 204957_at    | origin recognition complex, subunit 5-like (yeast)               | <i>ORC5L</i>         | 5001          |
| 219105_x_at  | origin recognition complex, subunit 6 like (yeast)               | <i>ORC6L</i>         | 23594         |
| 205040_at    | orosomuroid 1                                                    | <i>ORM1</i>          | 5004          |
| 214465_at    | orosomuroid 1 /// orosomuroid 2                                  | <i>ORM1 /// ORM2</i> | 5004 /// 5004 |
| 205041_s_at  | orosomuroid 1 /// orosomuroid 2                                  | <i>ORM1 /// ORM2</i> | 5004 /// 5004 |
| 223259_at    | ORM1-like 3 (S. cerevisiae)                                      | <i>ORMDL3</i>        | 94103         |
| 223734_at    | ovary-specific acidic protein                                    | <i>OSAP</i>          | 84709         |
| 201800_s_at  | oxysterol binding protein                                        | <i>OSBP</i>          | 5007          |
| 201799_s_at  | oxysterol binding protein                                        | <i>OSBP</i>          | 5007          |
| 216755_at    | oxysterol binding protein-like 10                                | <i>OSBPL10</i>       | 114884        |
| 218304_s_at  | oxysterol binding protein-like 11                                | <i>OSBPL11</i>       | 114885        |
| 208158_s_at  | oxysterol binding protein-like 1A                                | <i>OSBPL1A</i>       | 114876        |
| 209222_s_at  | oxysterol binding protein-like 2                                 | <i>OSBPL2</i>        | 9885          |
| 233734_s_at  | oxysterol binding protein-like 5                                 | <i>OSBPL5</i>        | 114879        |
| 230032_at    | O-sialoglycoprotein endopeptidase-like 1                         | <i>OSGEPL1</i>       | 64172         |
| 1554414_a_at | oxidative stress induced growth inhibitor family member 2        | <i>OSGIN2</i>        | 734           |
| 230170_at    | oncostatin M                                                     | <i>OSM</i>           | 5008          |
| 214637_at    | oncostatin M                                                     | <i>OSM</i>           | 5008          |
| 235197_s_at  | osteopetrosis associated transmembrane protein 1                 | <i>OSTM1</i>         | 28962         |
| 235198_at    | osteopetrosis associated transmembrane protein 1                 | <i>OSTM1</i>         | 28962         |
| 218196_at    | osteopetrosis associated transmembrane protein 1                 | <i>OSTM1</i>         | 28962         |
| 223835_x_at  | orthopedia homeobox                                              | <i>OTP</i>           | 23440         |
| 226140_s_at  | OTU domain containing 1                                          | <i>OTUD1</i>         | 220213        |
| 233933_s_at  | OTU domain containing 5                                          | <i>OTUD5</i>         | 55593         |
| 1555426_a_at | OTU domain containing 5                                          | <i>OTUD5</i>         | 55593         |
| 222825_at    | OTU domain containing 6B                                         | <i>OTUD6B</i>        | 51633         |
| 229396_at    | ovo-like 1(Drosophila)                                           | <i>OVOL1</i>         | 5017          |
| 211778_s_at  | ovo-like 2 (Drosophila)                                          | <i>OVOL2</i>         | 58495         |
| 219133_at    | 3-oxoacyl-ACP synthase, mitochondrial                            | <i>OXSM</i>          | 54995         |
| 202696_at    | oxidative-stress responsive 1                                    | <i>OXSRI</i>         | 9943          |
| 206825_at    | oxytocin receptor                                                | <i>OXTR</i>          | 5021          |
| 228566_at    | Hypothetical protein FLJ10656                                    | <i>P15RS</i>         | 55197         |
| 217608_at    | P18SRP protein                                                   | <i>P18SRP</i>        | 285672        |
| 1553581_s_at | P18SRP protein                                                   | <i>P18SRP</i>        | 285672        |
| 235390_at    | P18SRP protein                                                   | <i>P18SRP</i>        | 285672        |
| 204088_at    | purinergic receptor P2X, ligand-gated ion channel, 4             | <i>P2RX4</i>         | 5025          |
| 1553856_s_at | purinergic receptor P2Y, G-protein coupled, 10                   | <i>P2RY10</i>        | 27334         |
| 214615_at    | purinergic receptor P2Y, G-protein coupled, 10                   | <i>P2RY10</i>        | 27334         |
| 220005_at    | purinergic receptor P2Y, G-protein coupled, 13                   | <i>P2RY13</i>        | 53829         |
| 206637_at    | purinergic receptor P2Y, G-protein coupled, 14                   | <i>P2RY14</i>        | 9934          |

|              |                                                                                  |                           |              |
|--------------|----------------------------------------------------------------------------------|---------------------------|--------------|
| 218589_at    | purinergic receptor P2Y, G-protein coupled, 5                                    | <i>P2RY5</i>              | 10161        |
| 207543_s_at  | procollagen-proline, 2-oxoglutarate 4-dioxygenase (proline 4-hydroxylase), alpha | <i>P4HA1</i>              | 5033         |
| 202733_at    | procollagen-proline, 2-oxoglutarate 4-dioxygenase (proline 4-hydroxylase), alpha | <i>P4HA2</i>              | 8974         |
| 1564494_s_at | procollagen-proline, 2-oxoglutarate 4-dioxygenase (proline 4-hydroxylase), beta  | <i>P4HB</i>               | 5034         |
| 200656_s_at  | procollagen-proline, 2-oxoglutarate 4-dioxygenase (proline 4-hydroxylase), beta  | <i>P4HB</i>               | 5034         |
| 200654_at    | procollagen-proline, 2-oxoglutarate 4-dioxygenase (proline 4-hydroxylase), beta  | <i>P4HB</i>               | 5034         |
| 214794_at    | proliferation-associated 2G4, 38kDa                                              | <i>PA2G4</i>              | 5036         |
| 215157_x_at  | poly(A) binding protein, cytoplasmic 1                                           | <i>PABPC1</i>             | 26986        |
| 208113_x_at  | poly(A) binding protein, cytoplasmic 3                                           | <i>PABPC3</i>             | 5042         |
| 213046_at    | poly(A) binding protein, nuclear 1                                               | <i>PABPN1</i>             | 8106         |
| 224658_x_at  | phosphofurin acidic cluster sorting protein 1                                    | <i>PACS1</i>              | 55690        |
| 1554691_a_at | protein kinase C and casein kinase substrate in neurons 2                        | <i>PAC SIN2</i>           | 11252        |
| 201651_s_at  | protein kinase C and casein kinase substrate in neurons 2                        | <i>PAC SIN2</i>           | 11252        |
| 220001_at    | peptidyl arginine deiminase, type IV                                             | <i>PADI4</i>              | 23569        |
| 211413_s_at  | peptidyl arginine deiminase, type IV                                             | <i>PADI4</i>              | 23569        |
| 200815_s_at  | platelet-activating factor acetylhydrolase, isoform Ib, alpha subunit 45kDa      | <i>PAFAH1B1</i>           | 5048         |
| 224777_s_at  | platelet-activating factor acetylhydrolase, isoform Ib, beta subunit 30kDa       | <i>PAFAH1B2</i>           | 5049         |
| 205233_s_at  | platelet-activating factor acetylhydrolase 2, 40kDa                              | <i>PAFAH2</i>             | 5051         |
| 205232_s_at  | platelet-activating factor acetylhydrolase 2, 40kDa                              | <i>PAFAH2</i>             | 5051         |
| 225622_at    | phosphoprotein associated with glycosphingolipid microdomains 1                  | <i>PAG1</i>               | 55824        |
| 227354_at    | phosphoprotein associated with glycosphingolipid microdomains 1                  | <i>PAG1</i>               | 55824        |
| 225626_at    | phosphoprotein associated with glycosphingolipid microdomains 1                  | <i>PAG1</i>               | 55824        |
| 201013_s_at  | phosphoribosylaminoimidazole carboxylase, phosphoribosylaminoimidazole suc       | <i>PAICS</i>              | 10606        |
| 208051_s_at  | poly(A) binding protein interacting protein 1                                    | <i>PAIP1</i>              | 10605        |
| 209064_x_at  | poly(A) binding protein interacting protein 1                                    | <i>PAIP1</i>              | 10605        |
| 213754_s_at  | poly(A) binding protein interacting protein 1                                    | <i>PAIP1</i>              | 10605 /// 64 |
| 222984_at    | poly(A) binding protein interacting protein 2                                    | <i>PAIP2</i>              | 51247        |
| 222983_s_at  | poly(A) binding protein interacting protein 2                                    | <i>PAIP2</i>              | 51247        |
| 208876_s_at  | p21 (CDKN1A)-activated kinase 2                                                  | <i>PAK2</i>               | 5062         |
| 208878_s_at  | p21 (CDKN1A)-activated kinase 2                                                  | <i>PAK2</i>               | 5062         |
| 1559052_s_at | p21 (CDKN1A)-activated kinase 2                                                  | <i>PAK2</i>               | 5062         |
| 33814_at     | p21(CDKN1A)-activated kinase 4                                                   | <i>PAK4</i>               | 10298        |
| 200897_s_at  | palladin, cytoskeletal associated protein                                        | <i>PALLD</i>              | 23022        |
| 202336_s_at  | peptidylglycine alpha-amidating monooxygenase                                    | <i>PAM</i>                | 5066         |
| 228735_s_at  | Pantothenate kinase 2 (Hallervorden-Spatz syndrome)                              | <i>PANK2</i>              | 80025        |
| 218771_at    | pantothenate kinase 4                                                            | <i>PANK4</i>              | 55229        |
| 239067_s_at  | pannexin 2                                                                       | <i>PANX2</i>              | 56666        |
| 222794_x_at  | PAP associated domain containing 1                                               | <i>PAPD1</i>              | 55149        |
| 229676_at    | PAP associated domain containing 1                                               | <i>PAPD1</i>              | 55149        |
| 233873_x_at  | PAP associated domain containing 1                                               | <i>PAPD1</i>              | 55149        |
| 218947_s_at  | PAP associated domain containing 1                                               | <i>PAPD1</i>              | 55149        |
| 1556277_a_at | PAP associated domain containing 4                                               | <i>PAPD4</i>              | 167153       |
| 229043_at    | PAP associated domain containing 5                                               | <i>PAPD5</i>              | 64282        |
| 209388_at    | poly(A) polymerase alpha                                                         | <i>PAPOLA</i>             | 10914        |
| 222035_s_at  | poly(A) polymerase alpha                                                         | <i>PAPOLA</i>             | 10914        |
| 242158_at    | poly(A) polymerase beta (testis specific)                                        | <i>PAPOLB</i>             | 56903        |
| 1556929_at   | Poly(A) polymerase gamma                                                         | <i>PAPOLG</i>             | 64895        |
| 224940_s_at  | pregnancy-associated plasma protein A, pappalysin 1                              | <i>PAPPA</i>              | 5069         |
| 203059_s_at  | 3'-phosphoadenosine 5'-phosphosulfate synthase 2                                 | <i>PAPSS2</i>             | 9060         |
| 213372_at    | progesterin and adipoQ receptor family member III                                | <i>PAQR3</i>              | 152559       |
| 242123_at    | progesterin and adipoQ receptor family member VII                                | <i>PAQR7</i>              | 164091       |
| 227626_at    | progesterin and adipoQ receptor family member VIII                               | <i>PAQR8</i>              | 85315        |
| 218271_s_at  | presenilin associated, rhomboid-like                                             | <i>PARL</i>               | 55486        |
| 218543_s_at  | poly (ADP-ribose) polymerase family, member 12                                   | <i>PARP12</i>             | 64761        |
| 224701_at    | poly (ADP-ribose) polymerase family, member 14                                   | <i>PARP14</i>             | 54625        |
| 232610_at    | poly (ADP-ribose) polymerase family, member 14                                   | <i>PARP14</i>             | 54625        |
| 234710_s_at  | poly (ADP-ribose) polymerase family, member 6                                    | <i>PARP6</i>              | 56965        |
| 219639_x_at  | poly (ADP-ribose) polymerase family, member 6                                    | <i>PARP6</i>              | 56965        |
| 232683_s_at  | poly (ADP-ribose) polymerase family, member 6                                    | <i>PARP6</i>              | 56965        |
| 227807_at    | poly (ADP-ribose) polymerase family, member 9                                    | <i>PARP9</i>              | 83666        |
| 223220_s_at  | poly (ADP-ribose) polymerase family, member 9                                    | <i>PARP9</i>              | 83666        |
| 214834_at    | small nuclear ribonucleoprotein polypeptide N /// Prader-Willi/Angelman syndr    | <i>PAR-SN /// PAR5 //</i> | 8123         |
| 216253_s_at  | parvin, beta                                                                     | <i>PARVB</i>              | 29780        |

|              |                                                                                      |                               |        |
|--------------|--------------------------------------------------------------------------------------|-------------------------------|--------|
| 223562_at    | parvin, gamma                                                                        | PARVG                         | 64098  |
| 213534_s_at  | PAS domain containing serine/threonine kinase                                        | PASK                          | 23178  |
| 235795_at    | paired box 6                                                                         | PAX6                          | 5080   |
| 121_at       | paired box 8                                                                         | PAX8                          | 7849   |
| 212825_at    | PAX interacting (with transcription-activation domain) protein 1                     | PAXIP1                        | 22976  |
| 217739_s_at  | pre-B-cell colony enhancing factor 1                                                 | PBEF1                         | 10135  |
| 217738_at    | pre-B-cell colony enhancing factor 1                                                 | PBEF1                         | 10135  |
| 1555167_s_at | pre-B-cell colony enhancing factor 1                                                 | PBEF1                         | 10135  |
| 243296_at    | Pre-B-cell colony enhancing factor 1                                                 | PBEF1                         | 10135  |
| 219543_at    | phenazine biosynthesis-like protein domain containing                                | PBLD                          | 64081  |
| 214177_s_at  | pre-B-cell leukemia homeobox interacting protein 1                                   | PBXIP1                        | 57326  |
| 212259_s_at  | pre-B-cell leukemia homeobox interacting protein 1                                   | PBXIP1                        | 57326  |
| 207838_x_at  | pre-B-cell leukemia homeobox interacting protein 1                                   | PBXIP1                        | 57326  |
| 239585_at    | P300/CBP-associated factor                                                           | PCAF                          | 8850   |
| 208620_at    | poly(rC) binding protein 1                                                           | PCBP1                         | 5093   |
| 204031_s_at  | poly(rC) binding protein 2                                                           | PCBP2                         | 5094   |
| 213263_s_at  | poly(rC) binding protein 2                                                           | PCBP2                         | 5094   |
| 232376_at    | Propionyl Coenzyme A carboxylase, alpha polypeptide                                  | PCCA                          | 5095   |
| 210292_s_at  | protocadherin 11 X-linked /// protocadherin 11 Y-linked                              | PCDH11X /// PCDH 27328 /// 8: |        |
| 217049_x_at  | protocadherin 11 Y-linked                                                            | PCDH11Y                       | 83259  |
| 205656_at    | protocadherin 17                                                                     | PCDH17                        | 27253  |
| 225975_at    | protocadherin 18                                                                     | PCDH18                        | 54510  |
| 1552735_at   | protocadherin gamma subfamily A, 4                                                   | PCDHGA4                       | 56111  |
| 203378_at    | PCF11, cleavage and polyadenylation factor subunit, homolog ( <i>S. cerevisiae</i> ) | PCF11                         | 51585  |
| 230408_at    | Polycomb group ring finger 3                                                         | PCGF3                         | ---    |
| 227935_s_at  | polycomb group ring finger 5                                                         | PCGF5                         | 84333  |
| 226326_at    | polycomb group ring finger 5                                                         | PCGF5                         | 84333  |
| 224326_s_at  | polycomb group ring finger 6                                                         | PCGF6                         | 84108  |
| 244706_at    | protein-L-isoaspartate (D-aspartate) O-methyltransferase domain containing 1         | PCMTD1                        | 115294 |
| 212406_s_at  | protein-L-isoaspartate (D-aspartate) O-methyltransferase domain containing 2         | PCMTD2                        | 55251  |
| 201202_at    | proliferating cell nuclear antigen                                                   | PCNA                          | 5111   |
| 213173_at    | pecanex homolog ( <i>Drosophila</i> )                                                | PCNX                          | 22990  |
| 213159_at    | pecanex homolog ( <i>Drosophila</i> )                                                | PCNX                          | 22990  |
| 229287_at    | pecanex homolog ( <i>Drosophila</i> )                                                | PCNX                          | 22990  |
| 39650_s_at   | pecanex-like 2 ( <i>Drosophila</i> )                                                 | PCNXL2                        | 80003  |
| 205559_s_at  | proprotein convertase subtilisin/kexin type 5                                        | PCSK5                         | 5125   |
| 213652_at    | proprotein convertase subtilisin/kexin type 5                                        | PCSK5                         | 5125   |
| 207239_s_at  | PCTAIRE protein kinase 1                                                             | PCTK1                         | 5127   |
| 208824_x_at  | PCTAIRE protein kinase 1                                                             | PCTK1                         | 5127   |
| 228420_at    | programmed cell death 2                                                              | PDCCD2                        | 5134   |
| 203415_at    | programmed cell death 6                                                              | PDCCD6                        | 10016  |
| 222394_at    | programmed cell death 6 interacting protein                                          | PDCCD6IP                      | 10015  |
| 231809_x_at  | programmed cell death 7                                                              | PDCCD7                        | 10081  |
| 204449_at    | phosducin-like                                                                       | PDCL                          | 5082   |
| 231213_at    | phosphodiesterase 1A, calmodulin-dependent                                           | PDE1A                         | 5136   |
| 208396_s_at  | phosphodiesterase 1A, calmodulin-dependent                                           | PDE1A                         | 5136   |
| 222317_at    | Phosphodiesterase 3B, cGMP-inhibited                                                 | PDE3B                         | 5140   |
| 214582_at    | phosphodiesterase 3B, cGMP-inhibited                                                 | PDE3B                         | 5140   |
| 208591_s_at  | phosphodiesterase 3B, cGMP-inhibited                                                 | PDE3B                         | 5140   |
| 204735_at    | phosphodiesterase 4A, cAMP-specific (phosphodiesterase E2 dunce homolog, <i>D</i> )  | PDE4A                         | 5141   |
| 206792_x_at  | phosphodiesterase 4C, cAMP-specific (phosphodiesterase E1 dunce homolog, <i>D</i> )  | PDE4C                         | 5143   |
| 210836_x_at  | phosphodiesterase 4D, cAMP-specific (phosphodiesterase E3 dunce homolog, <i>D</i> )  | PDE4D                         | 5144   |
| 210837_s_at  | phosphodiesterase 4D, cAMP-specific (phosphodiesterase E3 dunce homolog, <i>D</i> )  | PDE4D                         | 5144   |
| 209700_x_at  | phosphodiesterase 4D interacting protein (myomegalin)                                | PDE4DIP                       | 9659   |
| 211751_at    | phosphodiesterase 4D interacting protein (myomegalin)                                | PDE4DIP                       | 9659   |
| 205872_x_at  | phosphodiesterase 4D interacting protein (myomegalin)                                | PDE4DIP                       | 9659   |
| 1552343_s_at | phosphodiesterase 7A                                                                 | PDE7A                         | 5150   |
| 224046_s_at  | phosphodiesterase 7A                                                                 | PDE7A                         | 5150   |
| 218718_at    | platelet derived growth factor C                                                     | PDGFC                         | 56034  |
| 219304_s_at  | platelet derived growth factor D                                                     | PDGFD                         | 80310  |
| 200979_at    | pyruvate dehydrogenase (lipoamide) alpha 1                                           | PDHA1                         | 5160   |
| 211023_at    | pyruvate dehydrogenase (lipoamide) beta                                              | PDHB                          | 5162   |
| 208911_s_at  | pyruvate dehydrogenase (lipoamide) beta                                              | PDHB                          | 5162   |

|              |                                                            |               |             |
|--------------|------------------------------------------------------------|---------------|-------------|
| 203067_at    | pyruvate dehydrogenase complex, component X                | <i>PDHX</i>   | 8050        |
| 229453_at    | Protein disulfide isomerase family A, member 3             | <i>PDIA3</i>  | 2923        |
| 208612_at    | protein disulfide isomerase family A, member 3             | <i>PDIA3</i>  | 2923        |
| 227033_at    | protein disulfide isomerase family A, member 3             | <i>PDIA3</i>  | 2923        |
| 227255_at    | PDLIM1 interacting kinase 1 like                           | <i>PDIK1L</i> | 149420      |
| 226452_at    | pyruvate dehydrogenase kinase, isozyme 1                   | <i>PDK1</i>   | 5163        |
| 206686_at    | pyruvate dehydrogenase kinase, isozyme 1                   | <i>PDK1</i>   | 5163        |
| 221957_at    | pyruvate dehydrogenase kinase, isozyme 3                   | <i>PDK3</i>   | 5165        |
| 206348_s_at  | pyruvate dehydrogenase kinase, isozyme 3                   | <i>PDK3</i>   | 5165        |
| 225207_at    | pyruvate dehydrogenase kinase, isozyme 4                   | <i>PDK4</i>   | 5166        |
| 208690_s_at  | PDZ and LIM domain 1 (elfin)                               | <i>PDLIM1</i> | 9124        |
| 219165_at    | PDZ and LIM domain 2 (mystique)                            | <i>PDLIM2</i> | 64236       |
| 241208_at    | PDZ and LIM domain 5                                       | <i>PDLIM5</i> | 10611       |
| 211681_s_at  | PDZ and LIM domain 5                                       | <i>PDLIM5</i> | 10611       |
| 203242_s_at  | PDZ and LIM domain 5                                       | <i>PDLIM5</i> | 10611       |
| 216804_s_at  | PDZ and LIM domain 5                                       | <i>PDLIM5</i> | 10611       |
| 1569150_x_at | PDZ and LIM domain 7 (enigma)                              | <i>PDLIM7</i> | 9260        |
| 214121_x_at  | PDZ and LIM domain 7 (enigma)                              | <i>PDLIM7</i> | 9260        |
| 224986_s_at  | 3-phosphoinositide dependent protein kinase-1              | <i>PDPK1</i>  | 5170        |
| 224902_at    | pyruvate dehydrogenase phosphatase regulatory subunit      | <i>P DPR</i>  | 55066       |
| 242302_at    | Androgen-induced proliferation inhibitor                   | <i>PDS5B</i>  | 23047       |
| 1570119_at   | Androgen-induced proliferation inhibitor                   | <i>PDS5B</i>  | 23047       |
| 220865_s_at  | prenyl (decaprenyl) diphosphate synthase, subunit 1        | <i>PDSS1</i>  | 23590       |
| 236298_at    | Prenyl (decaprenyl) diphosphate synthase, subunit 1        | <i>PDSS1</i>  | 23590       |
| 1555886_at   | prenyl (decaprenyl) diphosphate synthase, subunit 2        | <i>PDSS2</i>  | 57107       |
| 212053_at    | pyridoxal-dependent decarboxylase domain containing 1      | <i>PDXDC1</i> | 23042       |
| 218018_at    | pyridoxal (pyridoxine, vitamin B6) kinase                  | <i>PDXK</i>   | 8566        |
| 202671_s_at  | pyridoxal (pyridoxine, vitamin B6) kinase                  | <i>PDXK</i>   | 8566        |
| 218019_s_at  | pyridoxal (pyridoxine, vitamin B6) kinase                  | <i>PDXK</i>   | 8566        |
| 222492_at    | pyridoxal (pyridoxine, vitamin B6) kinase                  | <i>PDXK</i>   | 8566        |
| 233026_s_at  | PDZ domain containing 2                                    | <i>PDZD2</i>  | 23037       |
| 205380_at    | PDZ domain containing 1                                    | <i>PDZK1</i>  | 5174        |
| 210825_s_at  | phosphatidylethanolamine binding protein 1                 | <i>PEBP1</i>  | 5037        |
| 1559921_at   | platelet/endothelial cell adhesion molecule (CD31 antigen) | <i>PECAM1</i> | 5175        |
| 223619_x_at  | peroxisomal trans-2-enoyl-CoA reductase                    | <i>PECR</i>   | 55825       |
| 217923_at    | penta-EF-hand domain containing 1                          | <i>PEF1</i>   | 553115      |
| 209242_at    | paternally expressed 3                                     | <i>PEG3</i>   | 5178        |
| 232213_at    | Pellino homolog 1 (Drosophila)                             | <i>PELI1</i>  | 57162       |
| 219132_at    | pellino homolog 2 (Drosophila)                             | <i>PELI2</i>  | 57161       |
| 218472_s_at  | pelota homolog (Drosophila)                                | <i>PELO</i>   | 53918       |
| 36829_at     | period homolog 1 (Drosophila)                              | <i>PER1</i>   | 5187        |
| 202861_at    | period homolog 1 (Drosophila)                              | <i>PER1</i>   | 5187        |
| 205251_at    | period homolog 2 (Drosophila)                              | <i>PER2</i>   | 8864        |
| 1566844_at   | period 4 pseudogene                                        | <i>PER4</i>   | 168741      |
| 1566843_at   | period 4 pseudogene                                        | <i>PER4</i>   | 168741      |
| 204873_at    | peroxisome biogenesis factor 1                             | <i>PEX1</i>   | 5189        |
| 205094_at    | peroxisomal biogenesis factor 12                           | <i>PEX12</i>  | 5193        |
| 1558164_s_at | Peroxisome biogenesis factor 13                            | <i>PEX13</i>  | 5194        |
| 201707_at    | peroxisomal biogenesis factor 19                           | <i>PEX19</i>  | 5824        |
| 219180_s_at  | peroxisome biogenesis factor 26                            | <i>PEX26</i>  | 55670       |
| 203970_s_at  | peroxisomal biogenesis factor 3                            | <i>PEX3</i>   | 8504        |
| 214753_at    | Phosphonoformate immuno-associated protein 5               | <i>PFAAP5</i> | 10443       |
| 205361_s_at  | prefoldin subunit 4                                        | <i>PFDN4</i>  | 5203        |
| 226733_at    | 6-phosphofructo-2-kinase/fructose-2,6-biphosphatase 2      | <i>PFKFB2</i> | 5208        |
| 209992_at    | 6-phosphofructo-2-kinase/fructose-2,6-biphosphatase 2      | <i>PFKFB2</i> | 5208        |
| 202464_s_at  | 6-phosphofructo-2-kinase/fructose-2,6-biphosphatase 3      | <i>PFKFB3</i> | 5209        |
| 228499_at    | 6-phosphofructo-2-kinase/fructose-2,6-biphosphatase 4      | <i>PFKFB4</i> | 5210        |
| 201102_s_at  | phosphofructokinase, liver                                 | <i>PFKL</i>   | 5211        |
| 211065_x_at  | phosphofructokinase, liver                                 | <i>PFKL</i>   | 5211        |
| 210976_s_at  | phosphofructokinase, muscle                                | <i>PFKM</i>   | 5213        |
| 201037_at    | phosphofructokinase, platelet                              | <i>PFKP</i>   | 5214        |
| 204992_s_at  | profilin 2                                                 | <i>PFN2</i>   | 5217        |
| 243761_at    | PFTAIRE protein kinase 1                                   | <i>PFTK1</i>  | 100129289 , |

|              |                                                                             |                |        |
|--------------|-----------------------------------------------------------------------------|----------------|--------|
| 220576_at    | GPI deacylase                                                               | <i>PGAP1</i>   | 80055  |
| 213469_at    | GPI deacylase                                                               | <i>PGAP1</i>   | 80055  |
| 244321_at    | GPI deacylase                                                               | <i>PGAP1</i>   | 80055  |
| 203501_at    | plasma glutamate carboxypeptidase                                           | <i>PGCP</i>    | 10404  |
| 201118_at    | phosphogluconate dehydrogenase                                              | <i>PGD</i>     | 5226   |
| 215179_x_at  | Placental growth factor, vascular endothelial growth factor-related protein | <i>PGF</i>     | 5228   |
| 235615_at    | Protein geranylgeranyltransferase type I, beta subunit                      | <i>PGGT1B</i>  | 5229   |
| 242844_at    | Protein geranylgeranyltransferase type I, beta subunit                      | <i>PGGT1B</i>  | 5229   |
| 200738_s_at  | phosphoglycerate kinase 1                                                   | <i>PGK1</i>    | 5230   |
| 227068_at    | phosphoglycerate kinase 1                                                   | <i>PGK1</i>    | 5230   |
| 217356_s_at  | phosphoglycerate kinase 1                                                   | <i>PGK1</i>    | 5230   |
| 200737_at    | phosphoglycerate kinase 1                                                   | <i>PGK1</i>    | 5230   |
| 1558365_at   | phosphoglycerate kinase 1                                                   | <i>PGK1</i>    | ---    |
| 217383_at    | Phosphoglycerate kinase 1                                                   | <i>PGK1</i>    | 5230   |
| 218387_s_at  | 6-phosphogluconolactonase                                                   | <i>PGLS</i>    | 25796  |
| 218388_at    | 6-phosphogluconolactonase                                                   | <i>PGLS</i>    | 25796  |
| 1554316_at   | 6-phosphogluconolactonase                                                   | <i>PGLS</i>    | 25796  |
| 207384_at    | peptidoglycan recognition protein 1                                         | <i>PGLYRP1</i> | 8993   |
| 242817_at    | peptidoglycan recognition protein 2                                         | <i>PGLYRP2</i> | 114770 |
| 201968_s_at  | phosphoglucomutase 1                                                        | <i>PGM1</i>    | 5236   |
| 225366_at    | phosphoglucomutase 2                                                        | <i>PGM2</i>    | 55276  |
| 223738_s_at  | phosphoglucomutase 2                                                        | <i>PGM2</i>    | 55276  |
| 225367_at    | phosphoglucomutase 2                                                        | <i>PGM2</i>    | 55276  |
| 229553_at    | phosphoglucomutase 2-like 1                                                 | <i>PGM2L1</i>  | 283209 |
| 210041_s_at  | phosphoglucomutase 3                                                        | <i>PGM3</i>    | 5238   |
| 1560431_at   | phosphoglucomutase 5 pseudogene 1                                           | <i>PGM5P1</i>  | 653394 |
| 208305_at    | progesterone receptor                                                       | <i>PGR</i>     | 5241   |
| 201121_s_at  | progesterone receptor membrane component 1                                  | <i>PGRMC1</i>  | 10857  |
| 201701_s_at  | progesterone receptor membrane component 2                                  | <i>PGRMC2</i>  | 10424  |
| 226266_at    | phosphatidylglycerophosphate synthase 1                                     | <i>PGS1</i>    | 9489   |
| 219394_at    | phosphatidylglycerophosphate synthase 1                                     | <i>PGS1</i>    | 9489   |
| 222125_s_at  | hypoxia-inducible factor prolyl 4-hydroxylase                               | <i>PH-4</i>    | 54681  |
| 213638_at    | phosphatase and actin regulator 1                                           | <i>PHACTR1</i> | 221692 |
| 232045_at    | phosphatase and actin regulator 1                                           | <i>PHACTR1</i> | 221692 |
| 227947_at    | phosphatase and actin regulator 2                                           | <i>PHACTR2</i> | 9749   |
| 204048_s_at  | phosphatase and actin regulator 2                                           | <i>PHACTR2</i> | 9749   |
| 204049_s_at  | phosphatase and actin regulator 2                                           | <i>PHACTR2</i> | 9749   |
| 226823_at    | phosphatase and actin regulator 4                                           | <i>PHACTR4</i> | 65979  |
| 219235_s_at  | phosphatase and actin regulator 4                                           | <i>PHACTR4</i> | 65979  |
| 200658_s_at  | prohibitin                                                                  | <i>PHB</i>     | 5245   |
| 200919_at    | polyhomeotic homolog 2 (Drosophila)                                         | <i>PHC2</i>    | 1912   |
| 238693_at    | polyhomeotic homolog 3 (Drosophila)                                         | <i>PHC3</i>    | 80012  |
| 222687_s_at  | phytoceramidase, alkaline                                                   | <i>PHCA</i>    | 55331  |
| 222688_at    | phytoceramidase, alkaline                                                   | <i>PHCA</i>    | 55331  |
| 222689_at    | phytoceramidase, alkaline                                                   | <i>PHCA</i>    | 55331  |
| 202928_s_at  | PHD finger protein 1                                                        | <i>PHF1</i>    | 5252   |
| 40446_at     | PHD finger protein 1                                                        | <i>PHF1</i>    | 5252   |
| 234939_s_at  | PHD finger protein 12                                                       | <i>PHF12</i>   | 57649  |
| 231815_at    | PHD finger protein 12                                                       | <i>PHF12</i>   | 57649  |
| 225005_at    | PHD finger protein 13                                                       | <i>PHF13</i>   | 148479 |
| 228095_at    | PHD finger protein 14                                                       | <i>PHF14</i>   | 9678   |
| 204525_at    | PHD finger protein 14                                                       | <i>PHF14</i>   | 9678   |
| 212660_at    | PHD finger protein 15                                                       | <i>PHF15</i>   | 23338  |
| 204866_at    | PHD finger protein 16                                                       | <i>PHF16</i>   | 9767   |
| 218517_at    | PHD finger protein 17                                                       | <i>PHF17</i>   | 79960  |
| 225816_at    | PHD finger protein 17                                                       | <i>PHF17</i>   | 79960  |
| 225820_at    | PHD finger protein 17                                                       | <i>PHF17</i>   | 79960  |
| 227523_s_at  | PHD finger protein 20-like 1                                                | <i>PHF20L1</i> | 51105  |
| 226942_at    | PHD finger protein 20-like 1                                                | <i>PHF20L1</i> | 51105  |
| 222133_s_at  | PHD finger protein 20-like 1                                                | <i>PHF20L1</i> | 51105  |
| 219606_at    | PHD finger protein 20-like 1                                                | <i>PHF20L1</i> | 51105  |
| 1554472_a_at | PHD finger protein 20-like 1                                                | <i>PHF20L1</i> | 51105  |
| 231967_at    | PHD finger protein 20-like 1                                                | <i>PHF20L1</i> | 51105  |

|              |                                                                                  |                 |              |
|--------------|----------------------------------------------------------------------------------|-----------------|--------------|
| 1554153_a_at | PHD finger protein 21A                                                           | <i>PHF21A</i>   | 51317        |
| 203278_s_at  | PHD finger protein 21A                                                           | <i>PHF21A</i>   | 51317        |
| 1558965_at   | PHD finger protein 21A                                                           | <i>PHF21A</i>   | 51317        |
| 223081_at    | PHD finger protein 23                                                            | <i>PHF23</i>    | 79142        |
| 225309_at    | PHD finger protein 5A                                                            | <i>PHF5A</i>    | 84844        |
| 225501_at    | PHD finger protein 6                                                             | <i>PHF6</i>     | 84295        |
| 209439_s_at  | phosphorylase kinase, alpha 2 (liver)                                            | <i>PHKA2</i>    | 5256         |
| 209802_at    | pleckstrin homology-like domain, family A, member 2                              | <i>PHLDA2</i>   | 7262         |
| 209803_s_at  | pleckstrin homology-like domain, family A, member 2                              | <i>PHLDA2</i>   | 7262         |
| 225688_s_at  | pleckstrin homology-like domain, family B, member 2                              | <i>PHLDB2</i>   | 257068 /// € |
| 236218_at    | phosphatase, orphan 1                                                            | <i>PHOSPHO1</i> | 162466       |
| 209780_at    | putative homeodomain transcription factor 2                                      | <i>PHTF2</i>    | 57157        |
| 226623_at    | phytanoyl-CoA 2-hydroxylase interacting protein-like                             | <i>PHYHIPL</i>  | 84457        |
| 229947_at    | peptidase inhibitor 15                                                           | <i>PI15</i>     | 51050        |
| 41469_at     | peptidase inhibitor 3, skin-derived (SKALP)                                      | <i>PI3</i>      | 5266         |
| 203691_at    | peptidase inhibitor 3, skin-derived (SKALP)                                      | <i>PI3</i>      | 5266         |
| 1559479_at   | Phosphatidylinositol 4-kinase type 2 beta                                        | <i>PI4K2B</i>   | 55300        |
| 217863_at    | protein inhibitor of activated STAT, 1                                           | <i>PIAS1</i>    | 8554         |
| 217864_s_at  | protein inhibitor of activated STAT, 1                                           | <i>PIAS1</i>    | 8554         |
| 203035_s_at  | protein inhibitor of activated STAT, 3                                           | <i>PIAS3</i>    | 10401        |
| 203134_at    | phosphatidylinositol binding clathrin assembly protein                           | <i>PICALM</i>   | 8301         |
| 212506_at    | phosphatidylinositol binding clathrin assembly protein                           | <i>PICALM</i>   | 8301         |
| 215236_s_at  | phosphatidylinositol binding clathrin assembly protein                           | <i>PICALM</i>   | 8301         |
| 212511_at    | phosphatidylinositol binding clathrin assembly protein                           | <i>PICALM</i>   | 8301         |
| 205281_s_at  | phosphatidylinositol glycan anchor biosynthesis, class A (paroxysmal nocturnal h | <i>PIGA</i>     | 5277         |
| 242760_x_at  | phosphatidylinositol glycan anchor biosynthesis, class B                         | <i>PIGB</i>     | 9488         |
| 205452_at    | phosphatidylinositol glycan anchor biosynthesis, class B                         | <i>PIGB</i>     | 9488         |
| 205077_s_at  | phosphatidylinositol glycan anchor biosynthesis, class F                         | <i>PIGF</i>     | 5281         |
| 205078_at    | phosphatidylinositol glycan anchor biosynthesis, class F                         | <i>PIGF</i>     | 5281         |
| 209707_at    | phosphatidylinositol glycan anchor biosynthesis, class K                         | <i>PIGK</i>     | 10026        |
| 1555394_at   | phosphatidylinositol glycan anchor biosynthesis, class K                         | <i>PIGK</i>     | 10026        |
| 227639_at    | phosphatidylinositol glycan anchor biosynthesis, class K                         | <i>PIGK</i>     | 10026        |
| 205873_at    | phosphatidylinositol glycan anchor biosynthesis, class L                         | <i>PIGL</i>     | 9487         |
| 235168_at    | phosphatidylinositol glycan anchor biosynthesis, class M                         | <i>PIGM</i>     | 93183        |
| 223470_at    | phosphatidylinositol glycan anchor biosynthesis, class M                         | <i>PIGM</i>     | 93183        |
| 219238_at    | phosphatidylinositol glycan anchor biosynthesis, class V                         | <i>PIGV</i>     | 55650        |
| 1563111_a_at | phosphatidylinositol glycan anchor biosynthesis, class X                         | <i>PIGX</i>     | 54965        |
| 1552291_at   | phosphatidylinositol glycan anchor biosynthesis, class X                         | <i>PIGX</i>     | 54965        |
| 220041_at    | phosphatidylinositol glycan anchor biosynthesis, class Z                         | <i>PIGZ</i>     | 80235        |
| 1554508_at   | phosphoinositide-3-kinase adaptor protein 1                                      | <i>PIK3AP1</i>  | 118788       |
| 213070_at    | phosphoinositide-3-kinase, class 2, alpha polypeptide                            | <i>PIK3C2A</i>  | 5286         |
| 226094_at    | phosphoinositide-3-kinase, class 2, alpha polypeptide                            | <i>PIK3C2A</i>  | 5286         |
| 204484_at    | phosphoinositide-3-kinase, class 2, beta polypeptide                             | <i>PIK3C2B</i>  | 5287         |
| 1569272_at   | phosphoinositide-3-kinase, class 3                                               | <i>PIK3C3</i>   | 5289         |
| 241304_at    | phosphoinositide-3-kinase, class 3                                               | <i>PIK3C3</i>   | 5289         |
| 215394_at    | phosphoinositide-3-kinase, class 3                                               | <i>PIK3C3</i>   | 5289         |
| 235980_at    | Phosphoinositide-3-kinase, catalytic, alpha polypeptide                          | <i>PIK3CA</i>   | 5290         |
| 231854_at    | Phosphoinositide-3-kinase, catalytic, alpha polypeptide                          | <i>PIK3CA</i>   | 5290         |
| 217620_s_at  | phosphoinositide-3-kinase, catalytic, beta polypeptide                           | <i>PIK3CB</i>   | 5291         |
| 212688_at    | phosphoinositide-3-kinase, catalytic, beta polypeptide                           | <i>PIK3CB</i>   | 5291         |
| 211230_s_at  | phosphoinositide-3-kinase, catalytic, delta polypeptide                          | <i>PIK3CD</i>   | 5293         |
| 203879_at    | phosphoinositide-3-kinase, catalytic, delta polypeptide                          | <i>PIK3CD</i>   | 5293         |
| 221757_at    | phosphoinositide-3-kinase interacting protein 1                                  | <i>PIK3IP1</i>  | 113791       |
| 221756_at    | phosphoinositide-3-kinase interacting protein 1                                  | <i>PIK3IP1</i>  | 113791       |
| 220566_at    | phosphoinositide-3-kinase, regulatory subunit 5, p101                            | <i>PIK3R5</i>   | 23533        |
| 227645_at    | phosphoinositide-3-kinase, regulatory subunit 5, p101                            | <i>PIK3R5</i>   | 23533        |
| 219788_at    | paired immunoglobulin-like type 2 receptor alpha                                 | <i>PILRA</i>    | 29992        |
| 222218_s_at  | paired immunoglobulin-like type 2 receptor alpha                                 | <i>PILRA</i>    | 29992        |
| 204269_at    | pim-2 oncogene                                                                   | <i>PIM2</i>     | 11040        |
| 224739_at    | pim-3 oncogene                                                                   | <i>PIM3</i>     | 415116       |
| 202927_at    | protein (peptidylprolyl cis/trans isomerase) NIMA-interacting 1                  | <i>PIN1</i>     | 5300         |
| 207582_at    | protein (peptidylprolyl cis/trans isomerase) NIMA-interacting 1-like             | <i>PIN1L</i>    | 5301         |
| 214224_s_at  | protein (peptidylprolyl cis/trans isomerase) NIMA-interacting, 4 (parvulin)      | <i>PIN4</i>     | 5303         |



|             |                                                                               |                          |              |
|-------------|-------------------------------------------------------------------------------|--------------------------|--------------|
| 214735_at   | phosphoinositide-binding protein PIP3-E                                       | <i>PIP3-E</i>            | 26034        |
| 205632_s_at | phosphatidylinositol-4-phosphate 5-kinase, type I, beta                       | <i>PIP5K1B</i>           | 8395         |
| 217477_at   | phosphatidylinositol-4-phosphate 5-kinase, type I, beta                       | <i>PIP5K1B</i>           | 8395         |
| 202392_s_at | phosphatidylserine decarboxylase                                              | <i>PISD</i>              | 23761        |
| 201190_s_at | phosphatidylinositol transfer protein, alpha                                  | <i>PITPNA</i>            | 5306         |
| 201192_s_at | phosphatidylinositol transfer protein, alpha                                  | <i>PITPNA</i>            | 5306         |
| 201191_at   | phosphatidylinositol transfer protein, alpha                                  | <i>PITPNA</i>            | 5306         |
| 238649_at   | phosphatidylinositol transfer protein, cytoplasmic 1                          | <i>PITPNC1</i>           | 26207        |
| 201133_s_at | praja 2, RING-H2 motif containing                                             | <i>PJA2</i>              | 9867         |
| 203688_at   | polycystic kidney disease 2 (autosomal dominant)                              | <i>PKD2</i>              | 5311         |
| 223551_at   | protein kinase (cAMP-dependent, catalytic) inhibitor beta                     | <i>PKIB</i>              | 5570         |
| 201251_at   | pyruvate kinase, muscle                                                       | <i>PKM2</i>              | 5315         |
| 210969_at   | protein kinase N2                                                             | <i>PKN2</i>              | 5586         |
| 212628_at   | protein kinase N2                                                             | <i>PKN2</i>              | 5586         |
| 212629_s_at | protein kinase N2                                                             | <i>PKN2</i>              | 5586         |
| 63305_at    | PBX/knotted 1 homeobox 2                                                      | <i>PKNOX2</i>            | 63876        |
| 201928_at   | plakophilin 4                                                                 | <i>PKP4</i>              | 8502         |
| 201929_s_at | plakophilin 4                                                                 | <i>PKP4</i>              | 8502         |
| 201927_s_at | plakophilin 4                                                                 | <i>PKP4</i>              | 8502         |
| 219095_at   | phospholipase A2, group IVB (cytosolic)                                       | <i>PLA2G4B</i>           | 100137047,   |
| 237783_at   | PLAC8-like 1                                                                  | <i>PLAC8L1</i>           | 153770       |
| 205372_at   | pleiomorphic adenoma gene 1                                                   | <i>PLAG1</i>             | 5324         |
| 202924_s_at | pleiomorphic adenoma gene-like 2                                              | <i>PLAGL2</i>            | 5326         |
| 202925_s_at | pleiomorphic adenoma gene-like 2                                              | <i>PLAGL2</i>            | 5326         |
| 211668_s_at | plasminogen activator, urokinase                                              | <i>PLAU</i>              | 5328         |
| 205479_s_at | plasminogen activator, urokinase                                              | <i>PLAU</i>              | 5328         |
| 214866_at   | plasminogen activator, urokinase receptor                                     | <i>PLAUR</i>             | 5329         |
| 211924_s_at | plasminogen activator, urokinase receptor                                     | <i>PLAUR</i>             | 5329         |
| 210845_s_at | plasminogen activator, urokinase receptor                                     | <i>PLAUR</i>             | 5329         |
| 213222_at   | phospholipase C, beta 1 (phosphoinositide-specific)                           | <i>PLCB1</i>             | 23236        |
| 204046_at   | phospholipase C, beta 2                                                       | <i>PLCB2</i>             | 5330         |
| 240728_at   | Phospholipase C, beta 4                                                       | <i>PLCB4</i>             | 5332         |
| 213309_at   | phospholipase C-like 2                                                        | <i>PLCL2</i>             | 23228        |
| 218951_s_at | phosphatidylinositol-specific phospholipase C, X domain containing 1          | <i>PLCXD1</i>            | 55344        |
| 231425_at   | phospholipase C, zeta 1                                                       | <i>PLCZ1</i>             | 89869        |
| 177_at      | phospholipase D1, phosphatidylcholine-specific                                | <i>PLD1</i>              | 5337         |
| 224892_at   | pallidin homolog (mouse)                                                      | <i>PLDN</i>              | 26258        |
| 224883_at   | pallidin homolog (mouse)                                                      | <i>PLDN</i>              | 26258        |
| 222826_at   | pallidin homolog (mouse)                                                      | <i>PLDN</i>              | 26258        |
| 216971_s_at | plectin 1, intermediate filament binding protein 500kDa                       | <i>PLEC1</i>             | 5339         |
| 203471_s_at | pleckstrin                                                                    | <i>PLEK</i>              | 5341         |
| 203470_s_at | pleckstrin                                                                    | <i>PLEK</i>              | 5341         |
| 226247_at   | pleckstrin homology domain containing, family A (phosphoinositide binding spe | <i>PLEKHA1</i>           | 59338        |
| 238013_at   | pleckstrin homology domain containing, family A (phosphoinositide binding spe | <i>PLEKHA2</i>           | 59339        |
| 225136_at   | Pleckstrin homology domain containing, family A (phosphoinositide binding spe | <i>PLEKHA2</i>           | 59339        |
| 217677_at   | pleckstrin homology domain containing, family A (phosphoinositide binding spe | <i>PLEKHA2</i>           | 59339        |
| 223370_at   | pleckstrin homology domain containing, family A (phosphoinositide binding spe | <i>PLEKHA3</i>           | 65977        |
| 201410_at   | pleckstrin homology domain containing, family B (evectins) member 2           | <i>PLEKHB2</i>           | 55041        |
| 201411_s_at | pleckstrin homology domain containing, family B (evectins) member 2           | <i>PLEKHB2</i>           | 55041        |
| 222699_s_at | pleckstrin homology domain containing, family F (with FYVE domain) member 2   | <i>PLEKHF2</i>           | 79666        |
| 218640_s_at | pleckstrin homology domain containing, family F (with FYVE domain) member 2   | <i>PLEKHF2</i>           | 79666        |
| 226122_at   | pleckstrin homology domain containing, family G (with RhoGef domain) membe    | <i>PLEKHG1</i>           | 57480        |
| 212821_at   | pleckstrin homology domain containing, family G (with RhoGef domain) membe    | <i>PLEKHG3</i>           | 26030        |
| 212146_at   | pleckstrin homology domain containing, family M (with RUN domain) member 2    | <i>PLEKHM2</i>           | 23207        |
| 204436_at   | pleckstrin homology domain containing, family Q member 1                      | <i>PLEKHQ1</i>           | 80301        |
| 205871_at   | plasminogen-like B2 /// plasminogen-like B1 /// plasminogen-like A1           | <i>PLGLA1 /// PLGLB1</i> | 100134363,   |
| 214415_at   | plasminogen-like B2 /// plasminogen-like B1                                   | <i>PLGLB1 /// PLGLB2</i> | 5342 /// 534 |
| 201939_at   | polo-like kinase 2 (Drosophila)                                               | <i>PLK2</i>              | 10769        |
| 204958_at   | polo-like kinase 3 (Drosophila)                                               | <i>PLK3</i>              | 1263         |
| 202620_s_at | procollagen-lysine, 2-oxoglutarate 5-dioxygenase 2                            | <i>PLOD2</i>             | 5352         |
| 202619_s_at | procollagen-lysine, 2-oxoglutarate 5-dioxygenase 2                            | <i>PLOD2</i>             | 5352         |
| 201136_at   | proteolipid protein 2 (colonic epithelium-enriched)                           | <i>PLP2</i>              | 5355         |
| 227246_at   | pleiotropic regulator 1 (PRL1 homolog, Arabidopsis)                           | <i>PLRG1</i>             | 5356         |

|              |                                                                                          |                               |              |
|--------------|------------------------------------------------------------------------------------------|-------------------------------|--------------|
| 218901_at    | phospholipid scramblase 4                                                                | <i>PLSCR4</i>                 | 57088        |
| 214081_at    | plexin domain containing 1                                                               | <i>PLXDC1</i>                 | 57125        |
| 227276_at    | plexin domain containing 2                                                               | <i>PLXDC2</i>                 | 84898        |
| 221537_at    | plexin A1                                                                                | <i>PLXNA1</i>                 | 5361         |
| 213030_s_at  | plexin A2                                                                                | <i>PLXNA2</i>                 | 5362         |
| 206471_s_at  | plexin C1                                                                                | <i>PLXNC1</i>                 | 10154        |
| 204286_s_at  | phorbol-12-myristate-13-acetate-induced protein 1                                        | <i>PMAIP1</i>                 | 5366         |
| 204285_s_at  | phorbol-12-myristate-13-acetate-induced protein 1                                        | <i>PMAIP1</i>                 | 5366         |
| 224418_x_at  | pro-melanin-concentrating hormone-like 1                                                 | <i>PMCHL1</i>                 | 5369         |
| 224419_x_at  | pro-melanin-concentrating hormone-like 1                                                 | <i>PMCHL1</i>                 | 5369         |
| 235508_at    | promyelocytic leukemia                                                                   | <i>PML</i>                    | 5371         |
| 209640_at    | promyelocytic leukemia                                                                   | <i>PML</i>                    | 5371         |
| 206826_at    | peripheral myelin protein 2                                                              | <i>PMP2</i>                   | 5375         |
| 1570542_a_at | Peptidase (mitochondrial processing) beta                                                | <i>PMPCB</i>                  | 9512         |
| 213677_s_at  | PMS1 postmeiotic segregation increased 1 ( <i>S. cerevisiae</i> )                        | <i>PMS1</i>                   | 5378         |
| 221206_at    | PMS2 postmeiotic segregation increased 2 ( <i>S. cerevisiae</i> )                        | <i>PMS2</i>                   | 441194 /// ! |
| 209805_at    | PMS2 postmeiotic segregation increased 2 ( <i>S. cerevisiae</i> ) /// PMS2-C terminal-li | <i>PMS2</i> /// <i>PMS2CL</i> | 441194 /// ! |
| 242201_at    | Postmeiotic segregation increased 2-like 5                                               | <i>PMS2L5</i>                 | 5383         |
| 225298_at    | paroxysmal nonkinesigenic dyskinesia                                                     | <i>PNKD</i>                   | 25953        |
| 233177_s_at  | paroxysmal nonkinesigenic dyskinesia                                                     | <i>PNKD</i>                   | 25953        |
| 218961_s_at  | polynucleotide kinase 3'-phosphatase                                                     | <i>PNKP</i>                   | 11284        |
| 1567213_at   | pinin, desmosome associated protein                                                      | <i>PNN</i>                    | 5411         |
| 212037_at    | pinin, desmosome associated protein                                                      | <i>PNN</i>                    | 5411         |
| 1553364_at   | patatin-like phospholipase domain containing 1                                           | <i>PNPLA1</i>                 | 285848       |
| 223982_s_at  | patatin-like phospholipase domain containing 8                                           | <i>PNPLA8</i>                 | 50640        |
| 223310_x_at  | patatin-like phospholipase domain containing 8                                           | <i>PNPLA8</i>                 | 50640        |
| 223309_x_at  | patatin-like phospholipase domain containing 8                                           | <i>PNPLA8</i>                 | 50640        |
| 218511_s_at  | pyridoxamine 5'-phosphate oxidase                                                        | <i>PNPO</i>                   | 55163        |
| 225291_at    | polyribonucleotide nucleotidyltransferase 1                                              | <i>PNPT1</i>                  | 87178        |
| 209034_at    | proline-rich nuclear receptor coactivator 1                                              | <i>PNRC1</i>                  | 10957        |
| 218229_s_at  | pogo transposable element with KRAB domain                                               | <i>POGK</i>                   | 57645        |
| 214226_at    | polyserase 3                                                                             | <i>POL3S</i>                  | 339105       |
| 1554609_at   | Polymerase (DNA-directed), delta 3, accessory subunit                                    | <i>POLD3</i>                  | 10714        |
| 202996_at    | polymerase (DNA-directed), delta 4                                                       | <i>POLD4</i>                  | 57804        |
| 222425_s_at  | polymerase (DNA-directed), delta interacting protein 2                                   | <i>POLDIP2</i>                | 26073        |
| 205909_at    | polymerase (DNA directed), epsilon 2 (p59 subunit)                                       | <i>POLE2</i>                  | 5427         |
| 208828_at    | polymerase (DNA directed), epsilon 3 (p17 subunit)                                       | <i>POLE3</i>                  | 54107        |
| 219317_at    | polymerase (DNA directed) iota                                                           | <i>POLI</i>                   | 11201        |
| 207746_at    | polymerase (DNA directed), theta                                                         | <i>POLQ</i>                   | 10721        |
| 233341_s_at  | polymerase (RNA) I polypeptide B, 128kDa                                                 | <i>POLR1B</i>                 | 84172        |
| 223403_s_at  | polymerase (RNA) I polypeptide B, 128kDa                                                 | <i>POLR1B</i>                 | 84172        |
| 207515_s_at  | polymerase (RNA) I polypeptide C, 30kDa                                                  | <i>POLR1C</i>                 | 9533         |
| 218258_at    | polymerase (RNA) I polypeptide D, 16kDa                                                  | <i>POLR1D</i>                 | 51082        |
| 224857_s_at  | polymerase (RNA) I polypeptide D, 16kDa                                                  | <i>POLR1D</i>                 | 51082        |
| 202725_at    | polymerase (RNA) II (DNA directed) polypeptide A, 220kDa                                 | <i>POLR2A</i>                 | 5430         |
| 1555836_at   | Polymerase (RNA) II (DNA directed) polypeptide B, 140kDa                                 | <i>POLR2B</i>                 | 5431         |
| 216282_x_at  | polymerase (RNA) II (DNA directed) polypeptide C, 33kDa                                  | <i>POLR2C</i>                 | 5432         |
| 208996_s_at  | polymerase (RNA) II (DNA directed) polypeptide C, 33kDa                                  | <i>POLR2C</i>                 | 5432         |
| 212782_x_at  | polymerase (RNA) II (DNA directed) polypeptide J, 13.3kDa                                | <i>POLR2J</i>                 | 5439         |
| 211730_s_at  | polymerase (RNA) II (DNA directed) polypeptide L, 7.6kDa                                 | <i>POLR2L</i>                 | 5441         |
| 219459_at    | polymerase (RNA) III (DNA directed) polypeptide B                                        | <i>POLR3B</i>                 | 55703        |
| 218016_s_at  | polymerase (RNA) III (DNA directed) polypeptide E (80kD)                                 | <i>POLR3E</i>                 | 55718        |
| 217769_s_at  | proteasome maturation protein                                                            | <i>POMP</i>                   | 51371        |
| 204839_at    | processing of precursor 5, ribonuclease P/MRP subunit ( <i>S. cerevisiae</i> )           | <i>POP5</i>                   | 51367        |
| 208928_at    | P450 (cytochrome) oxidoreductase                                                         | <i>POR</i>                    | 5447         |
| 204354_at    | POT1 protection of telomeres 1 homolog ( <i>S. pombe</i> )                               | <i>POT1</i>                   | 25913        |
| 204353_s_at  | POT1 protection of telomeres 1 homolog ( <i>S. pombe</i> )                               | <i>POT1</i>                   | 25913        |
| 206789_s_at  | POU class 2 homeobox 1                                                                   | <i>POU2F1</i>                 | 5451         |
| 208345_s_at  | POU class 3 homeobox 1                                                                   | <i>POU3F1</i>                 | 5453         |
| 206940_s_at  | POU class 4 homeobox 1                                                                   | <i>POU4F1</i>                 | 100131317,   |
| 217848_s_at  | pyrophosphatase (inorganic) 1                                                            | <i>PPA1</i>                   | 5464         |
| 1559496_at   | Pyrophosphatase (inorganic) 2                                                            | <i>PPA2</i>                   | 27068        |
| 212230_at    | phosphatidic acid phosphatase type 2B                                                    | <i>PPAP2B</i>                 | 8613         |

|              |                                                                                 |                 |              |
|--------------|---------------------------------------------------------------------------------|-----------------|--------------|
| 212226_s_at  | phosphatidic acid phosphatase type 2B                                           | <i>PPAP2B</i>   | 8613         |
| 209355_s_at  | phosphatidic acid phosphatase type 2B                                           | <i>PPAP2B</i>   | 8613         |
| 226384_at    | phosphatidic acid phosphatase type 2 domain containing 1B                       | <i>PPAPDC1B</i> | 84513        |
| 226150_at    | phosphatidic acid phosphatase type 2 domain containing 1B                       | <i>PPAPDC1B</i> | 84513        |
| 223568_s_at  | phosphatidic acid phosphatase type 2 domain containing 1B                       | <i>PPAPDC1B</i> | 84513        |
| 223569_at    | phosphatidic acid phosphatase type 2 domain containing 1B                       | <i>PPAPDC1B</i> | 84513        |
| 227385_at    | phosphatidic acid phosphatase type 2 domain containing 2                        | <i>PPAPDC2</i>  | 403313       |
| 1560981_a_at | peroxisome proliferator-activated receptor alpha                                | <i>PPARA</i>    | 5465         |
| 209433_s_at  | phosphoribosyl pyrophosphate amidotransferase                                   | <i>PPAT</i>     | 5471         |
| 219066_at    | phosphopantothenoylcysteine decarboxylase                                       | <i>PPCDC</i>    | 60490        |
| 210235_s_at  | protein tyrosine phosphatase, receptor type, f polypeptide (PTPRF), interacting | <i>PPFIA1</i>   | 8500         |
| 202066_at    | protein tyrosine phosphatase, receptor type, f polypeptide (PTPRF), interacting | <i>PPFIA1</i>   | 8500         |
| 202065_s_at  | protein tyrosine phosphatase, receptor type, f polypeptide (PTPRF), interacting | <i>PPFIA1</i>   | 8500         |
| 210236_at    | protein tyrosine phosphatase, receptor type, f polypeptide (PTPRF), interacting | <i>PPFIA1</i>   | 8500         |
| 232073_at    | protein tyrosine phosphatase, receptor type, f polypeptide (PTPRF), interacting | <i>PPFIA2</i>   | 8499         |
| 214978_s_at  | protein tyrosine phosphatase, receptor type, f polypeptide (PTPRF), interacting | <i>PPFIA4</i>   | 8497         |
| 1555351_s_at | periphilin 1                                                                    | <i>PPHLN1</i>   | 51535        |
| 227025_at    | periphilin 1                                                                    | <i>PPHLN1</i>   | 51535        |
| 210502_s_at  | peptidylprolyl isomerase E (cyclophilin E)                                      | <i>PPIE</i>     | 10450        |
| 201490_s_at  | peptidylprolyl isomerase F (cyclophilin F)                                      | <i>PPIF</i>     | 10105        |
| 201489_at    | peptidylprolyl isomerase F (cyclophilin F)                                      | <i>PPIF</i>     | 10105        |
| 224364_s_at  | peptidylprolyl isomerase (cyclophilin)-like 3                                   | <i>PPII3</i>    | 53938        |
| 203966_s_at  | protein phosphatase 1A (formerly 2C), magnesium-dependent, alpha isoform        | <i>PPM1A</i>    | 5494         |
| 210407_at    | protein phosphatase 1A (formerly 2C), magnesium-dependent, alpha isoform        | <i>PPM1A</i>    | 5494         |
| 37384_at     | protein phosphatase 1F (PP2C domain containing)                                 | <i>PPM1F</i>    | 9647         |
| 203063_at    | protein phosphatase 1F (PP2C domain containing)                                 | <i>PPM1F</i>    | 9647         |
| 212686_at    | protein phosphatase 1H (PP2C domain containing)                                 | <i>PPM1H</i>    | 57460        |
| 235061_at    | protein phosphatase 1K (PP2C domain containing)                                 | <i>PPM1K</i>    | 152926       |
| 218273_s_at  | protein phosphatase 2C, magnesium-dependent, catalytic subunit                  | <i>PPM2C</i>    | 54704        |
| 222572_at    | protein phosphatase 2C, magnesium-dependent, catalytic subunit                  | <i>PPM2C</i>    | 54704        |
| 217841_s_at  | protein phosphatase methylesterase 1                                            | <i>PPME1</i>    | 51400        |
| 200846_s_at  | protein phosphatase 1, catalytic subunit, alpha isoform                         | <i>PPP1CA</i>   | 5499         |
| 201408_at    | protein phosphatase 1, catalytic subunit, beta isoform                          | <i>PPP1CB</i>   | 5500         |
| 201409_s_at  | protein phosphatase 1, catalytic subunit, beta isoform                          | <i>PPP1CB</i>   | 5500         |
| 201407_s_at  | protein phosphatase 1, catalytic subunit, beta isoform                          | <i>PPP1CB</i>   | 5500         |
| 200726_at    | protein phosphatase 1, catalytic subunit, gamma isoform                         | <i>PPP1CC</i>   | 5501         |
| 201500_s_at  | protein phosphatase 1, regulatory (inhibitor) subunit 11                        | <i>PPP1R11</i>  | 6992         |
| 1566303_s_at | protein phosphatase 1, regulatory (inhibitor) subunit 11                        | <i>PPP1R11</i>  | 6992         |
| 201604_s_at  | protein phosphatase 1, regulatory (inhibitor) subunit 12A                       | <i>PPP1R12A</i> | 4659         |
| 201957_at    | protein phosphatase 1, regulatory (inhibitor) subunit 12B                       | <i>PPP1R12B</i> | 4660         |
| 1557553_at   | Protein phosphatase 1, regulatory (inhibitor) subunit 12B                       | <i>PPP1R12B</i> | 4660         |
| 212680_x_at  | protein phosphatase 1, regulatory (inhibitor) subunit 14B                       | <i>PPP1R14B</i> | 26472        |
| 37028_at     | protein phosphatase 1, regulatory (inhibitor) subunit 15A                       | <i>PPP1R15A</i> | 23645        |
| 202014_at    | protein phosphatase 1, regulatory (inhibitor) subunit 15A                       | <i>PPP1R15A</i> | 23645        |
| 224692_at    | protein phosphatase 1, regulatory (inhibitor) subunit 15B                       | <i>PPP1R15B</i> | 84919        |
| 41577_at     | protein phosphatase 1, regulatory (inhibitor) subunit 16B                       | <i>PPP1R16B</i> | 26051        |
| 212750_at    | protein phosphatase 1, regulatory (inhibitor) subunit 16B                       | <i>PPP1R16B</i> | 26051        |
| 202166_s_at  | protein phosphatase 1, regulatory (inhibitor) subunit 2                         | <i>PPP1R2</i>   | 5504         |
| 204555_s_at  | protein phosphatase 1, regulatory (inhibitor) subunit 3D                        | <i>PPP1R3D</i>  | 5509         |
| 204554_at    | protein phosphatase 1, regulatory (inhibitor) subunit 3D                        | <i>PPP1R3D</i>  | 5509         |
| 229001_at    | Protein phosphatase 1, regulatory (inhibitor) subunit 3E                        | <i>PPP1R3E</i>  | 90673        |
| 227409_at    | protein phosphatase 1, regulatory (inhibitor) subunit 3E                        | <i>PPP1R3E</i>  | 90673        |
| 227412_at    | protein phosphatase 1, regulatory (inhibitor) subunit 3E                        | <i>PPP1R3E</i>  | 90673        |
| 229365_at    | protein phosphatase 1, regulatory (inhibitor) subunit 3F                        | <i>PPP1R3F</i>  | 89801        |
| 201214_s_at  | protein phosphatase 1, regulatory (inhibitor) subunit 7                         | <i>PPP1R7</i>   | 5510         |
| 228494_at    | protein phosphatase 1, regulatory (inhibitor) subunit 9A                        | <i>PPP1R9A</i>  | 55607        |
| 208652_at    | protein phosphatase 2 (formerly 2A), catalytic subunit, alpha isoform           | <i>PPP2CA</i>   | 5515         |
| 202313_at    | protein phosphatase 2 (formerly 2A), regulatory subunit B, alpha isoform        | <i>PPP2R2A</i>  | 5520 /// 800 |
| 228010_at    | protein phosphatase 2 (formerly 2A), regulatory subunit B, gamma isoform        | <i>PPP2R2C</i>  | 5522         |
| 221772_s_at  | protein phosphatase 2, regulatory subunit B, delta isoform                      | <i>PPP2R2D</i>  | 55844        |
| 1569894_at   | protein phosphatase 2 (formerly 2A), regulatory subunit B'', gamma              | <i>PPP2R3C</i>  | 55012        |
| 218852_at    | protein phosphatase 2 (formerly 2A), regulatory subunit B'', gamma              | <i>PPP2R3C</i>  | 55012        |
| 202187_s_at  | protein phosphatase 2, regulatory subunit B', alpha isoform                     | <i>PPP2R5A</i>  | 5525         |

|              |                                                                                   |                |              |
|--------------|-----------------------------------------------------------------------------------|----------------|--------------|
| 635_s_at     | protein phosphatase 2, regulatory subunit B', beta isoform                        | <i>PPP2R5B</i> | 5526         |
| 213305_s_at  | protein phosphatase 2, regulatory subunit B', gamma isoform                       | <i>PPP2R5C</i> | 5527         |
| 214083_at    | Protein phosphatase 2, regulatory subunit B', gamma isoform                       | <i>PPP2R5C</i> | 100132532    |
| 1557718_at   | protein phosphatase 2, regulatory subunit B', gamma isoform                       | <i>PPP2R5C</i> | 5527         |
| 201877_s_at  | protein phosphatase 2, regulatory subunit B', gamma isoform                       | <i>PPP2R5C</i> | 5527         |
| 202429_s_at  | protein phosphatase 3 (formerly 2B), catalytic subunit, alpha isoform             | <i>PPP3CA</i>  | 5530         |
| 202457_s_at  | protein phosphatase 3 (formerly 2B), catalytic subunit, alpha isoform             | <i>PPP3CA</i>  | 5530         |
| 32540_at     | Protein phosphatase 3 (formerly 2B), catalytic subunit, gamma isoform             | <i>PPP3CC</i>  | 5533         |
| 32541_at     | protein phosphatase 3 (formerly 2B), catalytic subunit, gamma isoform             | <i>PPP3CC</i>  | 5533         |
| 204507_s_at  | protein phosphatase 3 (formerly 2B), regulatory subunit B, alpha isoform          | <i>PPP3R1</i>  | 116143 /// 5 |
| 208932_at    | protein phosphatase 4 (formerly X), catalytic subunit                             | <i>PPP4C</i>   | 5531         |
| 226317_at    | protein phosphatase 4, regulatory subunit 2                                       | <i>PPP4R2</i>  | 151987       |
| 225519_at    | protein phosphatase 4, regulatory subunit 2                                       | <i>PPP4R2</i>  | 151987       |
| 203529_at    | protein phosphatase 6, catalytic subunit                                          | <i>PPP6C</i>   | 5537         |
| 200975_at    | palmitoyl-protein thioesterase 1 (ceroid-lipofuscinosis, neuronal 1, infantile)   | <i>PPT1</i>    | 5538         |
| 235744_at    | PTC7 protein phosphatase homolog ( <i>S. cerevisiae</i> )                         | <i>PPTC7</i>   | 160760       |
| 225204_at    | PTC7 protein phosphatase homolog ( <i>S. cerevisiae</i> )                         | <i>PPTC7</i>   | 160760       |
| 225213_at    | PTC7 protein phosphatase homolog ( <i>S. cerevisiae</i> )                         | <i>PPTC7</i>   | 160760       |
| 218208_at    | PQ loop repeat containing 1                                                       | <i>PQLC1</i>   | 100131178 ,  |
| 1555781_at   | PQ loop repeat containing 2                                                       | <i>PQLC2</i>   | 54896        |
| 225579_at    | PQ loop repeat containing 3                                                       | <i>PQLC3</i>   | 130814       |
| 203456_at    | PRA1 domain family, member 2                                                      | <i>PRAF2</i>   | 11230        |
| 1556727_at   | progressive rod-cone degeneration                                                 | <i>PRCD</i>    | 768206       |
| 49485_at     | PR domain containing 4                                                            | <i>PRDM4</i>   | 11108        |
| 201619_at    | peroxiredoxin 3                                                                   | <i>PRDX3</i>   | 10935        |
| 201923_at    | peroxiredoxin 4                                                                   | <i>PRDX4</i>   | 10549        |
| 1560587_s_at | peroxiredoxin 5                                                                   | <i>PRDX5</i>   | 25824        |
| 200844_s_at  | peroxiredoxin 6                                                                   | <i>PRDX6</i>   | 9588         |
| 224232_s_at  | PRELI domain containing 1                                                         | <i>PRELID1</i> | 27166        |
| 212217_at    | prolyl endopeptidase-like                                                         | <i>PREPL</i>   | 9581         |
| 212215_at    | prolyl endopeptidase-like                                                         | <i>PREPL</i>   | 9581         |
| 224909_s_at  | phosphatidylinositol 3,4,5-trisphosphate-dependent RAC exchanger 1                | <i>PREX1</i>   | 57580        |
| 224925_at    | phosphatidylinositol 3,4,5-trisphosphate-dependent RAC exchanger 1                | <i>PREX1</i>   | 57580        |
| 214617_at    | perforin 1 (pore forming protein)                                                 | <i>PRF1</i>    | 5551         |
| 1553681_a_at | perforin 1 (pore forming protein)                                                 | <i>PRF1</i>    | 5551         |
| 211743_s_at  | proteoglycan 2, bone marrow (natural killer cell activator, eosinophil granule m  | <i>PRG2</i>    | 5553         |
| 228230_at    | peroxisomal proliferator-activated receptor A interacting complex 285             | <i>PRIC285</i> | 85441        |
| 232787_at    | peroxisomal proliferator-activated receptor A interacting complex 285             | <i>PRIC285</i> | 85441        |
| 205053_at    | primase, DNA, polypeptide 1 (49kDa)                                               | <i>PRIM1</i>   | 5557         |
| 215708_s_at  | primase, DNA, polypeptide 2 (58kDa)                                               | <i>PRIM2</i>   | 5558         |
| 1555177_at   | protein kinase, AMP-activated, alpha 1 catalytic subunit                          | <i>PRKAA1</i>  | 5562         |
| 225984_at    | protein kinase, AMP-activated, alpha 1 catalytic subunit                          | <i>PRKAA1</i>  | 5562         |
| 214917_at    | protein kinase, AMP-activated, alpha 1 catalytic subunit                          | <i>PRKAA1</i>  | 5562         |
| 225985_at    | protein kinase, AMP-activated, alpha 1 catalytic subunit                          | <i>PRKAA1</i>  | 5562         |
| 240349_at    | protein kinase, AMP-activated, alpha 2 catalytic subunit                          | <i>PRKAA2</i>  | 5563         |
| 225278_at    | protein kinase, AMP-activated, beta 2 non-catalytic subunit                       | <i>PRKAB2</i>  | 5565         |
| 1558027_s_at | protein kinase, AMP-activated, beta 2 non-catalytic subunit                       | <i>PRKAB2</i>  | 5565         |
| 214474_at    | protein kinase, AMP-activated, beta 2 non-catalytic subunit                       | <i>PRKAB2</i>  | 5565         |
| 202741_at    | protein kinase, cAMP-dependent, catalytic, beta                                   | <i>PRKACB</i>  | 5567         |
| 202742_s_at  | protein kinase, cAMP-dependent, catalytic, beta                                   | <i>PRKACB</i>  | 5567         |
| 201805_at    | protein kinase, AMP-activated, gamma 1 non-catalytic subunit                      | <i>PRKAG1</i>  | 5571         |
| 200605_s_at  | protein kinase, cAMP-dependent, regulatory, type I, alpha (tissue specific exting | <i>PRKAR1A</i> | 5573         |
| 200604_s_at  | protein kinase, cAMP-dependent, regulatory, type I, alpha (tissue specific exting | <i>PRKAR1A</i> | 5573         |
| 204842_x_at  | protein kinase, cAMP-dependent, regulatory, type II, alpha                        | <i>PRKAR2A</i> | 5576         |
| 213093_at    | protein kinase C, alpha                                                           | <i>PRKCA</i>   | 5578         |
| 227824_at    | Protein kinase C, beta 1                                                          | <i>PRKCB1</i>  | 5579         |
| 227817_at    | Protein kinase C, beta 1                                                          | <i>PRKCB1</i>  | 5579         |
| 207957_s_at  | protein kinase C, beta 1                                                          | <i>PRKCB1</i>  | 5579         |
| 228795_at    | Protein kinase C, beta 1                                                          | <i>PRKCB1</i>  | 5579         |
| 202545_at    | protein kinase C, delta                                                           | <i>PRKCD</i>   | 5580         |
| 200707_at    | protein kinase C substrate 80K-H                                                  | <i>PRKCSH</i>  | 5589         |
| 38269_at     | protein kinase D2                                                                 | <i>PRKD2</i>   | 25865        |
| 222565_s_at  | protein kinase D3                                                                 | <i>PRKD3</i>   | 23683        |

|              |                                                                                 |                      |              |
|--------------|---------------------------------------------------------------------------------|----------------------|--------------|
| 218236_s_at  | protein kinase D3                                                               | <i>PRKD3</i>         | 23683        |
| 208694_at    | protein kinase, DNA-activated, catalytic polypeptide                            | <i>PRKDC</i>         | 5591         |
| 222615_s_at  | PRKR interacting protein 1 (IL11 inducible)                                     | <i>PRKRIP1</i>       | 79706        |
| 218378_s_at  | PRKR interacting protein 1 (IL11 inducible)                                     | <i>PRKRIP1</i>       | 79706        |
| 209323_at    | protein-kinase, interferon-inducible double stranded RNA dependent inhibitor, I | <i>PRKRIR</i>        | 5612         |
| 204061_at    | protein kinase, X-linked                                                        | <i>PRKX</i>          | 5613         |
| 204060_s_at  | protein kinase, X-linked /// protein kinase, Y-linked                           | <i>PRKX /// PRKY</i> | 5613 /// 561 |
| 221443_x_at  | prolactin releasing hormone                                                     | <i>PRLH</i>          | 51052        |
| 227629_at    | Prolactin receptor                                                              | <i>PRLR</i>          | 5618         |
| 231981_at    | Prolactin receptor                                                              | <i>PRLR</i>          | 5618         |
| 221564_at    | protein arginine methyltransferase 2                                            | <i>PRMT2</i>         | 3275         |
| 228722_at    | protein arginine methyltransferase 2                                            | <i>PRMT2</i>         | 3275         |
| 213320_at    | protein arginine methyltransferase 3                                            | <i>PRMT3</i>         | 10196        |
| 201300_s_at  | prion protein (p27-30) (Creutzfeldt-Jakob disease, Gerstmann-Strausler-Scheink  | <i>PRNP</i>          | 5621         |
| 227510_x_at  | PRO1073 protein                                                                 | <i>PRO1073</i>       | 378938       |
| 231735_s_at  | PRO1073 protein                                                                 | <i>PRO1073</i>       | 378938       |
| 233810_x_at  | PRO1268 protein                                                                 | <i>PRO1268</i>       | ---          |
| 233740_at    | PRO1268 protein                                                                 | <i>PRO1268</i>       | ---          |
| 220883_at    | hypothetical protein PRO2012                                                    | <i>PRO2012</i>       | 55478        |
| 220872_at    | hypothetical protein PRO2964                                                    | <i>PRO2964</i>       | 55415        |
| 214203_s_at  | proline dehydrogenase (oxidase) 1                                               | <i>PRODH</i>         | 5625         |
| 204304_s_at  | prominin 1                                                                      | <i>PROM1</i>         | 8842         |
| 207808_s_at  | protein S (alpha)                                                               | <i>PROS1</i>         | 5627         |
| 228656_at    | Prospero homeobox 1                                                             | <i>PROX1</i>         | 5629         |
| 209162_s_at  | PRP4 pre-mRNA processing factor 4 homolog (yeast)                               | <i>PRPF4</i>         | 9128         |
| 226687_at    | PRP40 pre-mRNA processing factor 40 homolog A (S. cerevisiae)                   | <i>PRPF40A</i>       | 55660        |
| 236477_at    | PRP40 pre-mRNA processing factor 40 homolog A (S. cerevisiae)                   | <i>PRPF40A</i>       | 55660        |
| 202126_at    | PRP4 pre-mRNA processing factor 4 homolog B (yeast)                             | <i>PRPF4B</i>        | 8899         |
| 202127_at    | PRP4 pre-mRNA processing factor 4 homolog B (yeast)                             | <i>PRPF4B</i>        | 8899         |
| 208880_s_at  | PRP6 pre-mRNA processing factor 6 homolog (S. cerevisiae)                       | <i>PRPF6</i>         | 24148        |
| 209440_at    | phosphoribosyl pyrophosphate synthetase 1                                       | <i>PRPS1</i>         | 5631         |
| 203401_at    | phosphoribosyl pyrophosphate synthetase 2                                       | <i>PRPS2</i>         | 5634         |
| 203537_at    | phosphoribosyl pyrophosphate synthetase-associated protein 2                    | <i>PRPSAP2</i>       | 5636         |
| 219392_x_at  | proline rich 11                                                                 | <i>PRR11</i>         | 55771        |
| 232215_x_at  | proline rich 11                                                                 | <i>PRR11</i>         | 55771        |
| 217794_at    | proline rich 13                                                                 | <i>PRR13</i>         | 54458        |
| 45687_at     | proline rich 14                                                                 | <i>PRR14</i>         | 78994        |
| 218714_at    | proline rich 14                                                                 | <i>PRR14</i>         | 78994        |
| 1559397_s_at | proline rich 14                                                                 | <i>PRR14</i>         | 78994        |
| 226611_s_at  | proline rich 6                                                                  | <i>PRR6</i>          | 201161       |
| 219742_at    | proline rich 7 (synaptic)                                                       | <i>PRR7</i>          | 80758        |
| 205618_at    | proline rich Gla (G-carboxyglutamic acid) 1                                     | <i>PRRG1</i>         | 5638         |
| 238513_at    | Proline rich Gla (G-carboxyglutamic acid) 4 (transmembrane)                     | <i>PRRG4</i>         | 79056        |
| 205991_s_at  | paired related homeobox 1                                                       | <i>PRRX1</i>         | 5396         |
| 1552349_a_at | protease, serine, 33                                                            | <i>PRSS33</i>        | 260429       |
| 207638_at    | protease, serine, 7 (enterokinase)                                              | <i>PRSS7</i>         | 5651         |
| 217269_s_at  | protease, serine, 7 (enterokinase)                                              | <i>PRSS7</i>         | 5651         |
| 222803_at    | phosphoribosyl transferase domain containing 1                                  | <i>PRTFDC1</i>       | 56952        |
| 209586_s_at  | prune homolog (Drosophila)                                                      | <i>PRUNE</i>         | 58497        |
| 210988_s_at  | prune homolog (Drosophila)                                                      | <i>PRUNE</i>         | 58497        |
| 226381_at    | HBV preS1-transactivated protein 4                                              | <i>PS1TP4</i>        | 414327       |
| 200866_s_at  | prosaposin (variant Gaucher disease and variant metachromatic leukodystrophy    | <i>PSAP</i>          | 5660         |
| 200871_s_at  | prosaposin (variant Gaucher disease and variant metachromatic leukodystrophy    | <i>PSAP</i>          | 5660         |
| 202880_s_at  | pleckstrin homology, Sec7 and coiled-coil domains 1(cytohesin 1)                | <i>PSCD1</i>         | 9267         |
| 202879_s_at  | pleckstrin homology, Sec7 and coiled-coil domains 1(cytohesin 1)                | <i>PSCD1</i>         | 9267         |
| 209158_s_at  | pleckstrin homology, Sec7 and coiled-coil domains 2 (cytohesin-2)               | <i>PSCD2</i>         | 9266         |
| 209606_at    | pleckstrin homology, Sec7 and coiled-coil domains, binding protein              | <i>PSCDBP</i>        | 9595         |
| 203355_s_at  | pleckstrin and Sec7 domain containing 3                                         | <i>PSD3</i>          | 23362        |
| 207782_s_at  | presenilin 1 (Alzheimer disease 3)                                              | <i>PSEN1</i>         | 5663         |
| 203460_s_at  | presenilin 1 (Alzheimer disease 3)                                              | <i>PSEN1</i>         | 5663         |
| 210195_s_at  | pregnancy specific beta-1-glycoprotein 1                                        | <i>PSG1</i>          | 5669         |
| 211741_x_at  | pregnancy specific beta-1-glycoprotein 3                                        | <i>PSG3</i>          | 5671         |
| 209738_x_at  | pregnancy specific beta-1-glycoprotein 6                                        | <i>PSG6</i>          | 5675         |

|             |                                                                                 |                |              |
|-------------|---------------------------------------------------------------------------------|----------------|--------------|
| 239910_at   | pregnancy specific beta-1-glycoprotein 6                                        | <i>PSG6</i>    | 5675         |
| 209594_x_at | pregnancy specific beta-1-glycoprotein 9                                        | <i>PSG9</i>    | 5678         |
| 205961_s_at | PC4 and SFRS1 interacting protein 1                                             | <i>PSIP1</i>   | 11168        |
| 209337_at   | PC4 and SFRS1 interacting protein 1                                             | <i>PSIP1</i>   | 11168        |
| 201316_at   | proteasome (prosome, macropain) subunit, alpha type, 2                          | <i>PSMA2</i>   | 5683         |
| 201532_at   | proteasome (prosome, macropain) subunit, alpha type, 3                          | <i>PSMA3</i>   | 5684         |
| 208805_at   | proteasome (prosome, macropain) subunit, alpha type, 6                          | <i>PSMA6</i>   | 5687 /// 969 |
| 201114_x_at | proteasome (prosome, macropain) subunit, alpha type, 7                          | <i>PSMA7</i>   | 5688         |
| 216088_s_at | proteasome (prosome, macropain) subunit, alpha type, 7                          | <i>PSMA7</i>   | 5688         |
| 200039_s_at | proteasome (prosome, macropain) subunit, beta type, 2                           | <i>PSMB2</i>   | 5690         |
| 228204_at   | Proteasome (prosome, macropain) subunit, beta type, 4                           | <i>PSMB4</i>   | 5692         |
| 208827_at   | proteasome (prosome, macropain) subunit, beta type, 6                           | <i>PSMB6</i>   | 5694         |
| 200786_at   | proteasome (prosome, macropain) subunit, beta type, 7                           | <i>PSMB7</i>   | 5695         |
| 201068_s_at | proteasome (prosome, macropain) 26S subunit, ATPase, 2                          | <i>PSMC2</i>   | 5701         |
| 201699_at   | proteasome (prosome, macropain) 26S subunit, ATPase, 6                          | <i>PSMC6</i>   | 5706         |
| 201198_s_at | proteasome (prosome, macropain) 26S subunit, non-ATPase, 1                      | <i>PSMD1</i>   | 5707         |
| 212296_at   | proteasome (prosome, macropain) 26S subunit, non-ATPase, 14                     | <i>PSMD14</i>  | 10213        |
| 211609_x_at | proteasome (prosome, macropain) 26S subunit, non-ATPase, 4                      | <i>PSMD4</i>   | 5710         |
| 232284_at   | Proteasome (prosome, macropain) 26S subunit, non-ATPase, 6                      | <i>PSMD6</i>   | 9861         |
| 200820_at   | proteasome (prosome, macropain) 26S subunit, non-ATPase, 8                      | <i>PSMD8</i>   | 5714         |
| 201762_s_at | proteasome (prosome, macropain) activator subunit 2 (PA28 beta)                 | <i>PSME2</i>   | 5721         |
| 200987_x_at | proteasome (prosome, macropain) activator subunit 3 (PA28 gamma; Ki)            | <i>PSME3</i>   | 10197        |
| 201052_s_at | proteasome (prosome, macropain) inhibitor subunit 1 (PI31)                      | <i>PSMF1</i>   | 9491         |
| 226574_at   | paraspeckle component 1                                                         | <i>PSPC1</i>   | 55269        |
| 219938_s_at | proline-serine-threonine phosphatase interacting protein 2                      | <i>PSTPIP2</i> | 9050         |
| 243995_at   | protein prenyltransferase alpha subunit repeat containing 1                     | <i>PTAR1</i>   | 375743       |
| 211271_x_at | polypyrimidine tract binding protein 1                                          | <i>PTBP1</i>   | 5725         |
| 212015_x_at | polypyrimidine tract binding protein 1                                          | <i>PTBP1</i>   | 5725         |
| 211270_x_at | polypyrimidine tract binding protein 1                                          | <i>PTBP1</i>   | 5725         |
| 222796_at   | pentatricopeptide repeat domain 1                                               | <i>PTCD1</i>   | 26024        |
| 228512_at   | Pentatricopeptide repeat domain 3                                               | <i>PTCD3</i>   | 55037        |
| 209816_at   | patched homolog 1 (Drosophila)                                                  | <i>PTCH1</i>   | 5727         |
| 201433_s_at | phosphatidylserine synthase 1                                                   | <i>PTDSS1</i>  | 9791         |
| 204053_x_at | phosphatase and tensin homolog (mutated in multiple advanced cancers 1)         | <i>PTEN</i>    | 5728         |
| 233314_at   | phosphatase and tensin homolog (mutated in multiple advanced cancers 1)         | <i>PTEN</i>    | 5728         |
| 222798_at   | phosphotriesterase related                                                      | <i>PTER</i>    | 9317         |
| 218967_s_at | phosphotriesterase related                                                      | <i>PTER</i>    | 9317         |
| 215894_at   | prostaglandin D2 receptor (DP)                                                  | <i>PTGDR</i>   | 5729         |
| 234165_at   | prostaglandin D2 receptor (DP)                                                  | <i>PTGDR</i>   | 5729         |
| 206631_at   | prostaglandin E receptor 2 (subtype EP2), 53kDa                                 | <i>PTGER2</i>  | 5732         |
| 204897_at   | prostaglandin E receptor 4 (subtype EP4)                                        | <i>PTGER4</i>  | 5734         |
| 204896_s_at | prostaglandin E receptor 4 (subtype EP4)                                        | <i>PTGER4</i>  | 5734         |
| 210367_s_at | prostaglandin E synthase                                                        | <i>PTGES</i>   | 9536         |
| 207388_s_at | prostaglandin E synthase                                                        | <i>PTGES</i>   | 9536         |
| 200627_at   | prostaglandin E synthase 3 (cytosolic)                                          | <i>PTGES3</i>  | 10728        |
| 208131_s_at | prostaglandin I2 (prostacyclin) synthase                                        | <i>PTGIS</i>   | 5740         |
| 203110_at   | PTK2B protein tyrosine kinase 2 beta                                            | <i>PTK2B</i>   | 2185         |
| 203111_s_at | PTK2B protein tyrosine kinase 2 beta                                            | <i>PTK2B</i>   | 2185         |
| 200772_x_at | prothymosin, alpha (gene sequence 28)                                           | <i>PTMA</i>    | 5757         |
| 211921_x_at | prothymosin, alpha (gene sequence 28)                                           | <i>PTMA</i>    | 5757         |
| 209465_x_at | pleiotrophin (heparin binding growth factor 8, neurite growth-promoting factor) | <i>PTN</i>     | 5764         |
| 211737_x_at | pleiotrophin (heparin binding growth factor 8, neurite growth-promoting factor) | <i>PTN</i>     | 5764         |
| 212032_s_at | prostate tumor overexpressed gene 1                                             | <i>PTOV1</i>   | 53635        |
| 200730_s_at | protein tyrosine phosphatase type IVA, member 1                                 | <i>PTP4A1</i>  | 7803         |
| 200733_s_at | protein tyrosine phosphatase type IVA, member 1                                 | <i>PTP4A1</i>  | 7803         |
| 200731_s_at | protein tyrosine phosphatase type IVA, member 1                                 | <i>PTP4A1</i>  | 7803         |
| 208615_s_at | protein tyrosine phosphatase type IVA, member 2                                 | <i>PTP4A2</i>  | 8073         |
| 208616_s_at | protein tyrosine phosphatase type IVA, member 2                                 | <i>PTP4A2</i>  | 8073         |
| 216988_s_at | protein tyrosine phosphatase type IVA, member 2                                 | <i>PTP4A2</i>  | 8073         |
| 202006_at   | protein tyrosine phosphatase, non-receptor type 12                              | <i>PTPN12</i>  | 5782         |
| 216915_s_at | protein tyrosine phosphatase, non-receptor type 12                              | <i>PTPN12</i>  | 5782         |
| 213521_at   | protein tyrosine phosphatase, non-receptor type 18 (brain-derived)              | <i>PTPN18</i>  | 26469        |
| 203555_at   | protein tyrosine phosphatase, non-receptor type 18 (brain-derived)              | <i>PTPN18</i>  | 26469        |

|              |                                                                                 |                                             |        |
|--------------|---------------------------------------------------------------------------------|---------------------------------------------|--------|
| 215172_at    | protein tyrosine phosphatase, non-receptor type 20B /// protein tyrosine phosph | <i>PTPN20A</i> /// <i>PTPN.26095</i> /// 65 |        |
| 223150_s_at  | protein tyrosine phosphatase, non-receptor type 23                              | <i>PTPN23</i>                               | 25930  |
| 205171_at    | protein tyrosine phosphatase, non-receptor type 4 (megakaryocyte)               | <i>PTPN4</i>                                | 5775   |
| 233226_at    | Protein tyrosine phosphatase, non-receptor type 9                               | <i>PTPN9</i>                                | 5780   |
| 233776_at    | Protein tyrosine phosphatase, receptor type, A                                  | <i>PTPRA</i>                                | 5786   |
| 230250_at    | Protein tyrosine phosphatase, receptor type, B                                  | <i>PTPRB</i>                                | 5787   |
| 1560105_at   | Protein tyrosine phosphatase, receptor type, B                                  | <i>PTPRB</i>                                | 5787   |
| 213362_at    | protein tyrosine phosphatase, receptor type, D                                  | <i>PTPRD</i>                                | 5789   |
| 214043_at    | protein tyrosine phosphatase, receptor type, D                                  | <i>PTPRD</i>                                | 5789   |
| 205712_at    | protein tyrosine phosphatase, receptor type, D                                  | <i>PTPRD</i>                                | 5789   |
| 221840_at    | protein tyrosine phosphatase, receptor type, E                                  | <i>PTPRE</i>                                | 5791   |
| 204944_at    | protein tyrosine phosphatase, receptor type, G                                  | <i>PTPRG</i>                                | 5793   |
| 227396_at    | protein tyrosine phosphatase, receptor type, J                                  | <i>PTPRJ</i>                                | 5795   |
| 210173_at    | protein tyrosine phosphatase, receptor type, J                                  | <i>PTPRJ</i>                                | 5795   |
| 203038_at    | protein tyrosine phosphatase, receptor type, K                                  | <i>PTPRK</i>                                | 5796   |
| 233609_at    | Protein tyrosine phosphatase, receptor type, K                                  | <i>PTPRK</i>                                | 5796   |
| 203029_s_at  | protein tyrosine phosphatase, receptor type, N polypeptide 2                    | <i>PTPRN2</i>                               | 5799   |
| 204469_at    | protein tyrosine phosphatase, receptor-type, Z polypeptide 1                    | <i>PTPRZ1</i>                               | 5803   |
| 218732_at    | peptidyl-tRNA hydrolase 2                                                       | <i>PTRH2</i>                                | 51651  |
| 209694_at    | 6-pyruvoyltetrahydropterin synthase                                             | <i>PTS</i>                                  | 5805   |
| 200677_at    | pituitary tumor-transforming 1 interacting protein                              | <i>PTTG1IP</i>                              | 754    |
| 204020_at    | purine-rich element binding protein A                                           | <i>PURA</i>                                 | 5813   |
| 235634_at    | purine-rich element binding protein G                                           | <i>PURG</i>                                 | 29942  |
| 221277_s_at  | pseudouridylate synthase 3                                                      | <i>PUS3</i>                                 | 83480  |
| 218984_at    | pseudouridylate synthase 7 homolog (S. cerevisiae)                              | <i>PUS7</i>                                 | 54517  |
| 229751_s_at  | pseudouridylate synthase 7 homolog (S. cerevisiae)-like                         | <i>PUS7L</i>                                | 83448  |
| 221025_x_at  | pseudouridylate synthase 7 homolog (S. cerevisiae)-like                         | <i>PUS7L</i>                                | 83448  |
| 219812_at    | poliovirus receptor related immunoglobulin domain containing                    | <i>PVRIG</i>                                | 79037  |
| 213325_at    | poliovirus receptor-related 3                                                   | <i>PVRL3</i>                                | 25945  |
| 201606_s_at  | PWP1 homolog (S. cerevisiae)                                                    | <i>PWP1</i>                                 | 11137  |
| 201608_s_at  | PWP1 homolog (S. cerevisiae)                                                    | <i>PWP1</i>                                 | 11137  |
| 227999_at    | PWWP domain containing 2                                                        | <i>PWWP2</i>                                | 170394 |
| 219428_s_at  | peroxisomal membrane protein 4, 24kDa                                           | <i>PXMP4</i>                                | 11264  |
| 221666_s_at  | PYD and CARD domain containing                                                  | <i>PYCARD</i>                               | 29108  |
| 219802_at    | pyridine nucleotide-disulphide oxidoreductase domain 1                          | <i>PYROXD1</i>                              | 79912  |
| 217846_at    | glutaminyl-tRNA synthetase                                                      | <i>QARS</i>                                 | 5859   |
| 212262_at    | quaking homolog, KH domain RNA binding (mouse)                                  | <i>QKI</i>                                  | 9444   |
| 236154_at    | Quaking homolog, KH domain RNA binding (mouse)                                  | <i>QKI</i>                                  | 9444   |
| 1555154_a_at | quaking homolog, KH domain RNA binding (mouse)                                  | <i>QKI</i>                                  | 9444   |
| 212636_at    | quaking homolog, KH domain RNA binding (mouse)                                  | <i>QKI</i>                                  | 9444   |
| 212263_at    | quaking homolog, KH domain RNA binding (mouse)                                  | <i>QKI</i>                                  | 9444   |
| 214543_x_at  | quaking homolog, KH domain RNA binding (mouse)                                  | <i>QKI</i>                                  | 9444   |
| 214541_s_at  | quaking homolog, KH domain RNA binding (mouse)                                  | <i>QKI</i>                                  | 9444   |
| 228540_at    | quaking homolog, KH domain RNA binding (mouse)                                  | <i>QKI</i>                                  | 9444   |
| 205174_s_at  | glutaminyl-peptide cyclotransferase (glutaminyl cyclase)                        | <i>QPCT</i>                                 | 25797  |
| 218949_s_at  | glutaminyl-tRNA synthase (glutamine-hydrolyzing)-like 1                         | <i>QRSL1</i>                                | 55278  |
| 244563_at    | glutamine and serine rich 1                                                     | <i>QSER1</i>                                | 79832  |
| 226265_at    | glutamine and serine rich 1                                                     | <i>QSER1</i>                                | 79832  |
| 202754_at    | R3H domain containing 1                                                         | <i>R3HDM1</i>                               | 23518  |
| 222981_s_at  | RAB10, member RAS oncogene family                                               | <i>RAB10</i>                                | 10890  |
| 200863_s_at  | RAB11A, member RAS oncogene family                                              | <i>RAB11A</i>                               | 8766   |
| 219681_s_at  | RAB11 family interacting protein 1 (class I)                                    | <i>RAB11FIP1</i>                            | 80223  |
| 228613_at    | RAB11 family interacting protein 3 (class II)                                   | <i>RAB11FIP3</i>                            | 9727   |
| 224482_s_at  | RAB11 family interacting protein 4 (class II)                                   | <i>RAB11FIP4</i>                            | 84440  |
| 225746_at    | RAB11 family interacting protein 4 (class II)                                   | <i>RAB11FIP4</i>                            | 84440  |
| 202252_at    | RAB13, member RAS oncogene family                                               | <i>RAB13</i>                                | 5872   |
| 200928_s_at  | RAB14, member RAS oncogene family                                               | <i>RAB14</i>                                | 51552  |
| 208724_s_at  | RAB1A, member RAS oncogene family                                               | <i>RAB1A</i>                                | 5861   |
| 207791_s_at  | RAB1A, member RAS oncogene family                                               | <i>RAB1A</i>                                | 5861   |
| 219622_at    | RAB20, member RAS oncogene family                                               | <i>RAB20</i>                                | 55647  |
| 203885_at    | RAB21, member RAS oncogene family                                               | <i>RAB21</i>                                | 23011  |
| 226268_at    | RAB21, member RAS oncogene family                                               | <i>RAB21</i>                                | 23011  |
| 218360_at    | RAB22A, member RAS oncogene family                                              | <i>RAB22A</i>                               | 57403  |

|              |                                                                                  |                                 |              |
|--------------|----------------------------------------------------------------------------------|---------------------------------|--------------|
| 223463_at    | RAB23, member RAS oncogene family                                                | <i>RAB23</i>                    | 51715        |
| 50965_at     | RAB26, member RAS oncogene family                                                | <i>RAB26</i>                    | 25837        |
| 208734_x_at  | RAB2A, member RAS oncogene family                                                | <i>RAB2A</i>                    | 5862         |
| 208733_at    | RAB2A, member RAS oncogene family                                                | <i>RAB2A</i>                    | 5862         |
| 228003_at    | RAB30, member RAS oncogene family                                                | <i>RAB30</i>                    | 27314        |
| 227842_at    | RAB30, member RAS oncogene family                                                | <i>RAB30</i>                    | 27314        |
| 228161_at    | RAB32, member RAS oncogene family                                                | <i>RAB32</i>                    | 10981        |
| 204214_s_at  | RAB32, member RAS oncogene family                                                | <i>RAB32</i>                    | 10981        |
| 206039_at    | RAB33A, member RAS oncogene family                                               | <i>RAB33A</i>                   | 9363         |
| 225620_at    | RAB35, member RAS oncogene family                                                | <i>RAB35</i>                    | 11021        |
| 205461_at    | RAB35, member RAS oncogene family                                                | <i>RAB35</i>                    | 11021        |
| 228113_at    | RAB37, member RAS oncogene family                                                | <i>RAB37</i>                    | 326624       |
| 241977_s_at  | RAB3C, member RAS oncogene family                                                | <i>RAB3C</i>                    | 115827       |
| 208466_at    | RAB3D, member RAS oncogene family                                                | <i>RAB3D</i>                    | 9545         |
| 225001_at    | RAB3D, member RAS oncogene family                                                | <i>RAB3D</i>                    | 9545         |
| 239527_at    | RAB3 GTPase activating protein subunit 1 (catalytic)                             | <i>RAB3GAP1</i>                 | 22930        |
| 243851_at    | RAB3 GTPase activating protein subunit 2 (non-catalytic)                         | <i>RAB3GAP2</i>                 | 25782        |
| 231399_at    | RAB3A interacting protein (rabin3)                                               | <i>RAB3IP</i>                   | 117177       |
| 203582_s_at  | RAB4A, member RAS oncogene family                                                | <i>RAB4A</i>                    | 5867         |
| 219807_x_at  | RAB4B, member RAS oncogene family                                                | <i>RAB4B</i>                    | 53916        |
| 209089_at    | RAB5A, member RAS oncogene family                                                | <i>RAB5A</i>                    | 5868         |
| 206113_s_at  | RAB5A, member RAS oncogene family                                                | <i>RAB5A</i>                    | 5868         |
| 201140_s_at  | RAB5C, member RAS oncogene family                                                | <i>RAB5C</i>                    | 5878         |
| 201156_s_at  | RAB5C, member RAS oncogene family                                                | <i>RAB5C</i>                    | 5878         |
| 201048_x_at  | RAB6A, member RAS oncogene family                                                | <i>RAB6A</i>                    | 5870         |
| 212561_at    | RAB6 interacting protein 1                                                       | <i>RAB6IP1</i>                  | 23258        |
| 211961_s_at  | RAB7A, member RAS oncogene family                                                | <i>RAB7A</i>                    | 7879         |
| 211960_s_at  | RAB7A, member RAS oncogene family                                                | <i>RAB7A</i>                    | 7879         |
| 218699_at    | RAB7, member RAS oncogene family-like 1                                          | <i>RAB7L1</i>                   | 8934         |
| 218700_s_at  | RAB7, member RAS oncogene family-like 1                                          | <i>RAB7L1</i>                   | 8934         |
| 219210_s_at  | RAB8B, member RAS oncogene family                                                | <i>RAB8B</i>                    | 51762        |
| 222846_at    | RAB8B, member RAS oncogene family                                                | <i>RAB8B</i>                    | 51762        |
| 226633_at    | RAB8B, member RAS oncogene family                                                | <i>RAB8B</i>                    | 51762        |
| 221808_at    | RAB9A, member RAS oncogene family                                                | <i>RAB9A</i>                    | 9367         |
| 213313_at    | RAB GTPase activating protein 1                                                  | <i>RABGAP1</i>                  | 23637        |
| 204028_s_at  | RAB GTPase activating protein 1                                                  | <i>RABGAP1</i>                  | 23637        |
| 213982_s_at  | RAB GTPase activating protein 1-like                                             | <i>RABGAP1L</i>                 | 9910         |
| 232702_at    | RAB GTPase activating protein 1-like                                             | <i>RABGAP1L</i>                 | 9910         |
| 203020_at    | RAB GTPase activating protein 1-like                                             | <i>RABGAP1L</i>                 | 9910         |
| 215342_s_at  | RAB GTPase activating protein 1-like                                             | <i>RABGAP1L</i>                 | 9910         |
| 218310_at    | RAB guanine nucleotide exchange factor (GEF) 1                                   | <i>RABGEF1</i>                  | 27342        |
| 219151_s_at  | RAB, member of RAS oncogene family-like 2B /// RAB, member of RAS oncogen        | <i>RABL2A</i> /// <i>RABL2E</i> | 11158 /// 1: |
| 1567458_s_at | ras-related C3 botulinum toxin substrate 1 (rho family, small GTP binding protei | <i>RAC1</i>                     | 5879         |
| 208641_s_at  | ras-related C3 botulinum toxin substrate 1 (rho family, small GTP binding protei | <i>RAC1</i>                     | 5879         |
| 207419_s_at  | ras-related C3 botulinum toxin substrate 2 (rho family, small GTP binding protei | <i>RAC2</i>                     | 5880         |
| 222077_s_at  | Rac GTPase activating protein 1                                                  | <i>RACGAP1</i>                  | 29127        |
| 204461_x_at  | RAD1 homolog (S. pombe)                                                          | <i>RAD1</i>                     | 5810         |
| 210216_x_at  | RAD1 homolog (S. pombe)                                                          | <i>RAD1</i>                     | 5810         |
| 235253_at    | RAD1 homolog (S. pombe)                                                          | <i>RAD1</i>                     | 5810         |
| 204460_s_at  | RAD1 homolog (S. pombe)                                                          | <i>RAD1</i>                     | 5810         |
| 210826_x_at  | RAD17 homolog (S. pombe)                                                         | <i>RAD17</i>                    | 5884         |
| 207405_s_at  | RAD17 homolog (S. pombe)                                                         | <i>RAD17</i>                    | 5884         |
| 200608_s_at  | RAD21 homolog (S. pombe)                                                         | <i>RAD21</i>                    | 5885         |
| 201223_s_at  | RAD23 homolog B (S. cerevisiae)                                                  | <i>RAD23B</i>                   | 5887         |
| 201222_s_at  | RAD23 homolog B (S. cerevisiae)                                                  | <i>RAD23B</i>                   | 5887         |
| 204146_at    | RAD51 associated protein 1                                                       | <i>RAD51AP1</i>                 | 10635        |
| 37793_r_at   | RAD51-like 3 (S. cerevisiae)                                                     | <i>RAD51L3</i>                  | 5892         |
| 220549_at    | RAD54 homolog B (S. cerevisiae)                                                  | <i>RAD54B</i>                   | 100128414 ,  |
| 204828_at    | RAD9 homolog A (S. pombe)                                                        | <i>RAD9A</i>                    | 5883         |
| 1557675_at   | V-raf-1 murine leukemia viral oncogene homolog 1                                 | <i>RAF1</i>                     | 5894         |
| 201244_s_at  | v-raf-1 murine leukemia viral oncogene homolog 1                                 | <i>RAF1</i>                     | 5894         |
| 214435_x_at  | v-ral simian leukemia viral oncogene homolog A (ras related)                     | <i>RALA</i>                     | 5898         |
| 202100_at    | v-ral simian leukemia viral oncogene homolog B (ras related; GTP binding protei  | <i>RALB</i>                     | 5899         |



|              |                                                                              |                         |              |
|--------------|------------------------------------------------------------------------------|-------------------------|--------------|
| 202845_s_at  | ralA binding protein 1                                                       | <i>RALBP1</i>           | 10928        |
| 202844_s_at  | ralA binding protein 1                                                       | <i>RALBP1</i>           | 10928        |
| 226957_x_at  | ralA binding protein 1                                                       | <i>RALBP1</i>           | 10928        |
| 209051_s_at  | ral guanine nucleotide dissociation stimulator                               | <i>RALGDS</i>           | 5900         |
| 209050_s_at  | ral guanine nucleotide dissociation stimulator                               | <i>RALGDS</i>           | 5900         |
| 232112_at    | Ral GEF with PH domain and SH3 binding motif 2                               | <i>RALGPS2</i>          | 55103        |
| 242458_at    | Ral GEF with PH domain and SH3 binding motif 2                               | <i>RALGPS2</i>          | 55103        |
| 201711_x_at  | RAN binding protein 2                                                        | <i>RANBP2</i>           | 5903         |
| 201713_s_at  | RAN binding protein 2                                                        | <i>RANBP2</i>           | 5903         |
| 226922_at    | RAN binding protein 2                                                        | <i>RANBP2</i>           | 5903         |
| 201712_s_at  | RAN binding protein 2                                                        | <i>RANBP2</i>           | 5903         |
| 242712_x_at  | RAN binding protein 2 /// RANBP2-like and GRIP domain containing 5 /// RANBF | <i>RANBP2 /// RGPD1</i> | 285190 /// 4 |
| 202640_s_at  | RAN binding protein 3                                                        | <i>RANBP3</i>           | 8498         |
| 211953_s_at  | RAN binding protein 5                                                        | <i>RANBP5</i>           | 3843         |
| 211955_at    | RAN binding protein 5                                                        | <i>RANBP5</i>           | 3843         |
| 211954_s_at  | RAN binding protein 5                                                        | <i>RANBP5</i>           | 3843         |
| 213019_at    | RAN binding protein 6                                                        | <i>RANBP6</i>           | 26953        |
| 202583_s_at  | RAN binding protein 9                                                        | <i>RANBP9</i>           | 10048        |
| 202582_s_at  | RAN binding protein 9                                                        | <i>RANBP9</i>           | 10048        |
| 216125_s_at  | RAN binding protein 9                                                        | <i>RANBP9</i>           | 10048        |
| 218526_s_at  | RAN guanine nucleotide release factor                                        | <i>RANGRF</i>           | 29098        |
| 237856_at    | RAP1, GTP-GDP dissociation stimulator 1                                      | <i>RAP1GDS1</i>         | 5910         |
| 229905_at    | RAP1, GTP-GDP dissociation stimulator 1                                      | <i>RAP1GDS1</i>         | 5910         |
| 225585_at    | RAP2A, member of RAS oncogene family                                         | <i>RAP2A</i>            | 5911         |
| 227897_at    | RAP2B, member of RAS oncogene family                                         | <i>RAP2B</i>            | 5912         |
| 218669_at    | RAP2C, member of RAS oncogene family                                         | <i>RAP2C</i>            | 57826        |
| 218668_s_at  | RAP2C, member of RAS oncogene family                                         | <i>RAP2C</i>            | 57826        |
| 226389_s_at  | Rap guanine nucleotide exchange factor (GEF) 1                               | <i>RAPGEF1</i>          | 2889         |
| 225738_at    | Rap guanine nucleotide exchange factor (GEF) 1                               | <i>RAPGEF1</i>          | 2889         |
| 204543_at    | Rap guanine nucleotide exchange factor (GEF) 1                               | <i>RAPGEF1</i>          | 2889         |
| 203096_s_at  | Rap guanine nucleotide exchange factor (GEF) 2                               | <i>RAPGEF2</i>          | 9693         |
| 203097_s_at  | Rap guanine nucleotide exchange factor (GEF) 2                               | <i>RAPGEF2</i>          | 9693         |
| 215987_at    | Rap guanine nucleotide exchange factor (GEF) 2                               | <i>RAPGEF2</i>          | 9693         |
| 1555247_a_at | Rap guanine nucleotide exchange factor (GEF) 6                               | <i>RAPGEF6</i>          | 51735        |
| 219112_at    | Rap guanine nucleotide exchange factor (GEF) 6                               | <i>RAPGEF6</i>          | 51735        |
| 230078_at    | Rap guanine nucleotide exchange factor (GEF) 6                               | <i>RAPGEF6</i>          | 51735        |
| 231075_x_at  | Ras association (RalGDS/AF-6) and pleckstrin homology domains 1              | <i>RAPH1</i>            | 65059        |
| 204070_at    | retinoic acid receptor responder (tazarotene induced) 3                      | <i>RARRES3</i>          | 5920         |
| 232902_s_at  | arginyl-tRNA synthetase 2, mitochondrial (putative)                          | <i>RARS2</i>            | 57038        |
| 206636_at    | RAS p21 protein activator 2                                                  | <i>RASA2</i>            | 5922         |
| 212706_at    | RAS p21 protein activator 4                                                  | <i>RASA4</i>            | 100132214,   |
| 227036_at    | RAS protein activator like 2                                                 | <i>RASAL2</i>           | ---          |
| 1557432_at   | RAS protein activator like 2                                                 | <i>RASAL2</i>           | 9462         |
| 1553186_x_at | RAS and EF-hand domain containing                                            | <i>RASEF</i>            | 158158       |
| 1553185_at   | RAS and EF-hand domain containing                                            | <i>RASEF</i>            | 158158       |
| 230563_at    | RasGEF domain family, member 1A                                              | <i>RASGEF1A</i>         | 221002       |
| 208206_s_at  | RAS guanyl releasing protein 2 (calcium and DAG-regulated)                   | <i>RASGRP2</i>          | 10235        |
| 214369_s_at  | RAS guanyl releasing protein 2 (calcium and DAG-regulated)                   | <i>RASGRP2</i>          | 10235        |
| 219142_at    | RAS-like, family 11, member B                                                | <i>RASL11B</i>          | 65997        |
| 204346_s_at  | Ras association (RalGDS/AF-6) domain family 1                                | <i>RASSF1</i>           | 11186        |
| 226436_at    | Ras association (RalGDS/AF-6) domain family 4                                | <i>RASSF4</i>           | 83937        |
| 49306_at     | Ras association (RalGDS/AF-6) domain family 4                                | <i>RASSF4</i>           | 83937        |
| 1554834_a_at | Ras association (RalGDS/AF-6) domain family 5                                | <i>RASSF5</i>           | 83593        |
| 235638_at    | Ras association (RalGDS/AF-6) domain family 6                                | <i>RASSF6</i>           | 166824       |
| 40359_at     | Ras association (RalGDS/AF-6) domain family 7                                | <i>RASSF7</i>           | 8045         |
| 204927_at    | Ras association (RalGDS/AF-6) domain family 7                                | <i>RASSF7</i>           | 8045         |
| 211540_s_at  | retinoblastoma 1 (including osteosarcoma)                                    | <i>RB1</i>              | 5925         |
| 202033_s_at  | RB1-inducible coiled-coil 1                                                  | <i>RB1CC1</i>           | 9821         |
| 1552329_at   | retinoblastoma binding protein 6                                             | <i>RBBP6</i>            | 5930         |
| 223802_s_at  | retinoblastoma binding protein 6                                             | <i>RBBP6</i>            | 5930         |
| 201092_at    | retinoblastoma binding protein 7                                             | <i>RBBP7</i>            | 5931         |
| 203344_s_at  | retinoblastoma binding protein 8                                             | <i>RBBP8</i>            | 5932         |
| 227859_at    | rab and Dnal domain containing                                               | <i>RBJ</i>              | 51277        |

|              |                                                                        |               |              |
|--------------|------------------------------------------------------------------------|---------------|--------------|
| 219222_at    | ribokinase                                                             | <i>RBKS</i>   | 64080        |
| 57540_at     | ribokinase                                                             | <i>RBKS</i>   | 64080        |
| 217221_x_at  | RNA binding motif protein 10                                           | <i>RBM10</i>  | 8241         |
| 208984_x_at  | RNA binding motif protein 10                                           | <i>RBM10</i>  | 8241         |
| 215089_s_at  | RNA binding motif protein 10                                           | <i>RBM10</i>  | 8241         |
| 211686_s_at  | RNA binding motif protein 13                                           | <i>RBM13</i>  | 84549        |
| 228455_at    | RNA binding motif protein 15                                           | <i>RBM15</i>  | 64783        |
| 1555762_s_at | RNA binding motif protein 15                                           | <i>RBM15</i>  | 64783        |
| 219286_s_at  | RNA binding motif protein 15                                           | <i>RBM15</i>  | 64783        |
| 226987_at    | RNA binding motif protein 15B                                          | <i>RBM15B</i> | 29890        |
| 224780_at    | RNA binding motif protein 17                                           | <i>RBM17</i>  | 84991        |
| 225236_at    | RNA binding motif protein 18                                           | <i>RBM18</i>  | 92400        |
| 224068_x_at  | RNA binding motif protein 22                                           | <i>RBM22</i>  | 55696        |
| 219816_s_at  | RNA binding motif protein 23                                           | <i>RBM23</i>  | 55147        |
| 235004_at    | RNA binding motif protein 24                                           | <i>RBM24</i>  | 221662       |
| 1557081_at   | RNA binding motif protein 25                                           | <i>RBM25</i>  | 58517        |
| 212031_at    | RNA binding motif protein 25                                           | <i>RBM25</i>  | 58517        |
| 218422_s_at  | RNA binding motif protein 26                                           | <i>RBM26</i>  | 64062        |
| 238801_at    | RNA binding motif protein 33                                           | <i>RBM33</i>  | 155435       |
| 225141_at    | RNA binding motif protein 35B                                          | <i>RBM35B</i> | ---          |
| 225139_at    | RNA binding motif protein 35B                                          | <i>RBM35B</i> | ---          |
| 225137_at    | RNA binding motif protein 35B                                          | <i>RBM35B</i> | ---          |
| 238355_at    | RNA binding motif protein 39                                           | <i>RBM39</i>  | 9584         |
| 238357_at    | RNA binding motif protein 39                                           | <i>RBM39</i>  | 9584         |
| 243038_at    | RNA binding motif protein 43                                           | <i>RBM43</i>  | 375287       |
| 201394_s_at  | RNA binding motif protein 5                                            | <i>RBM5</i>   | 10181        |
| 1556672_a_at | RNA binding motif protein 6                                            | <i>RBM6</i>   | 10180        |
| 218379_at    | RNA binding motif protein 7                                            | <i>RBM7</i>   | 10179        |
| 222443_s_at  | RNA binding motif protein 8A                                           | <i>RBM8A</i>  | 9939         |
| 1554602_at   | RNA binding motif protein 8A                                           | <i>RBM8A</i>  | 9939         |
| 217857_s_at  | RNA binding motif protein 8A                                           | <i>RBM8A</i>  | 9939         |
| 238447_at    | RNA binding motif, single stranded interacting protein                 | <i>RBMS3</i>  | 27303        |
| 225310_at    | RNA binding motif protein, X-linked                                    | <i>RBMX</i>   | 27316        |
| 213762_x_at  | RNA binding motif protein, X-linked                                    | <i>RBMX</i>   | 27316        |
| 238066_at    | retinol binding protein 7, cellular                                    | <i>RBP7</i>   | 116362       |
| 211974_x_at  | recombination signal binding protein for immunoglobulin kappa J region | <i>RBPJ</i>   | 3516         |
| 207785_s_at  | recombination signal binding protein for immunoglobulin kappa J region | <i>RBPJ</i>   | 3516         |
| 238421_at    | Ring finger and CCCH-type zinc finger domains 2                        | <i>RC3H2</i>  | 54542        |
| 220202_s_at  | ring finger and CCCH-type zinc finger domains 2                        | <i>RC3H2</i>  | 54542        |
| 231716_at    | ring finger and CCCH-type zinc finger domains 2                        | <i>RC3H2</i>  | 54542        |
| 230134_s_at  | ring finger and CCCH-type zinc finger domains 2                        | <i>RC3H2</i>  | 54542        |
| 208370_s_at  | regulator of calcineurin 1                                             | <i>RCAN1</i>  | 1827         |
| 226272_at    | RCAN family member 3                                                   | <i>RCAN3</i>  | 11123        |
| 224578_at    | regulator of chromosome condensation 2                                 | <i>RCC2</i>   | 55920        |
| 205333_s_at  | RCE1 homolog, prenyl protein peptidase ( <i>S. cerevisiae</i> )        | <i>RCE1</i>   | 9986         |
| 201063_at    | reticulocalbin 1, EF-hand calcium binding domain                       | <i>RCN1</i>   | 5954         |
| 201486_at    | reticulocalbin 2, EF-hand calcium binding domain                       | <i>RCN2</i>   | 5955         |
| 201485_s_at  | reticulocalbin 2, EF-hand calcium binding domain                       | <i>RCN2</i>   | 5955         |
| 212612_at    | REST corepressor 1                                                     | <i>RCOR1</i>  | 23186        |
| 209219_at    | RD RNA binding protein                                                 | <i>RDBP</i>   | 7936         |
| 227467_at    | retinol dehydrogenase 10 (all-trans)                                   | <i>RDH10</i>  | 157506       |
| 217042_at    | retinol dehydrogenase 11 (all-trans/9-cis/11-cis)                      | <i>RDH11</i>  | 51109        |
| 222203_s_at  | retinol dehydrogenase 14 (all-trans/9-cis/11-cis)                      | <i>RDH14</i>  | 57665 /// 9: |
| 212398_at    | radixin                                                                | <i>RDX</i>    | 5962         |
| 212397_at    | radixin                                                                | <i>RDX</i>    | 5962         |
| 204969_s_at  | radixin                                                                | <i>RDX</i>    | 5962         |
| 216153_x_at  | reversion-inducing-cysteine-rich protein with kazal motifs             | <i>RECK</i>   | 8434         |
| 212917_x_at  | RecQ protein-like (DNA helicase Q1-like)                               | <i>RECQL</i>  | 5965         |
| 205091_x_at  | RecQ protein-like (DNA helicase Q1-like)                               | <i>RECQL</i>  | 5965         |
| 212918_at    | RecQ protein-like (DNA helicase Q1-like)                               | <i>RECQL</i>  | 5965         |
| 210568_s_at  | RecQ protein-like (DNA helicase Q1-like)                               | <i>RECQL</i>  | 5965         |
| 34063_at     | RecQ protein-like 5                                                    | <i>RECQL5</i> | 9400         |
| 221686_s_at  | RecQ protein-like 5                                                    | <i>RECQL5</i> | 9400         |

|              |                                                                                   |                        |        |
|--------------|-----------------------------------------------------------------------------------|------------------------|--------|
| 225785_at    | receptor accessory protein 3                                                      | <i>REEP3</i>           | 221035 |
| 208873_s_at  | receptor accessory protein 5                                                      | <i>REEP5</i>           | 7905   |
| 208872_s_at  | receptor accessory protein 5                                                      | <i>REEP5</i>           | 7905   |
| 206036_s_at  | v-rel reticuloendotheliosis viral oncogene homolog (avian)                        | <i>REL</i>             | 5966   |
| 206035_at    | v-rel reticuloendotheliosis viral oncogene homolog (avian)                        | <i>REL</i>             | 5966   |
| 209878_s_at  | v-rel reticuloendotheliosis viral oncogene homolog A, nuclear factor of kappa lig | <i>RELA</i>            | 5970   |
| 201783_s_at  | v-rel reticuloendotheliosis viral oncogene homolog A, nuclear factor of kappa lig | <i>RELA</i>            | 5970   |
| 205923_at    | reelin                                                                            | <i>RELN</i>            | 5649   |
| 227060_at    | RELT tumor necrosis factor receptor                                               | <i>RELT</i>            | 84957  |
| 206617_s_at  | renin binding protein                                                             | <i>RENBP</i>           | 5973   |
| 219041_s_at  | replication initiator 1                                                           | <i>REPIN1</i>          | 29803  |
| 224366_s_at  | RALBP1 associated Eps domain containing 1                                         | <i>REPS1</i>           | 85021  |
| 205645_at    | RALBP1 associated Eps domain containing 2                                         | <i>REPS2</i>           | 9185   |
| 202296_s_at  | RER1 retention in endoplasmic reticulum 1 homolog (S. cerevisiae)                 | <i>RER1</i>            | 11079  |
| 202297_s_at  | RER1 retention in endoplasmic reticulum 1 homolog (S. cerevisiae)                 | <i>RER1</i>            | 11079  |
| 221643_s_at  | arginine-glutamic acid dipeptide (RE) repeats                                     | <i>RERE</i>            | 473    |
| 200940_s_at  | arginine-glutamic acid dipeptide (RE) repeats                                     | <i>RERE</i>            | 473    |
| 200939_s_at  | arginine-glutamic acid dipeptide (RE) repeats                                     | <i>RERE</i>            | 473    |
| 1566472_s_at | retinol saturase (all-trans-retinol 13,14-reductase)                              | <i>RETSAT</i>          | 54884  |
| 218194_at    | REX2, RNA exonuclease 2 homolog (S. cerevisiae)                                   | <i>REXO2</i>           | 25996  |
| 208021_s_at  | replication factor C (activator 1) 1, 145kDa                                      | <i>RFC1</i>            | 5981   |
| 1053_at      | replication factor C (activator 1) 2, 40kDa                                       | <i>RFC2</i>            | 5982   |
| 203696_s_at  | replication factor C (activator 1) 2, 40kDa                                       | <i>RFC2</i>            | 5982   |
| 204127_at    | replication factor C (activator 1) 3, 38kDa                                       | <i>RFC3</i>            | 5983   |
| 204128_s_at  | replication factor C (activator 1) 3, 38kDa                                       | <i>RFC3</i>            | 5983   |
| 204023_at    | replication factor C (activator 1) 4, 37kDa                                       | <i>RFC4</i>            | 5984   |
| 228980_at    | ring finger and FYVE-like domain containing 1                                     | <i>RFFL</i>            | 117584 |
| 207936_x_at  | ret finger protein-like 3 /// ret finger protein-like 2                           | <i>RFPL2 /// RFPL3</i> | 10738  |
| 234950_s_at  | ring finger and WD repeat domain 2                                                | <i>RFWD2</i>           | 64326  |
| 226872_at    | regulatory factor X, 2 (influences HLA class II expression)                       | <i>RFX2</i>            | 5990   |
| 230403_at    | regulatory factor X, 3 (influences HLA class II expression)                       | <i>RFX3</i>            | ---    |
| 229431_at    | regulatory factor X-associated protein                                            | <i>RFXAP</i>           | 5994   |
| 222630_at    | regulatory factor X domain containing 2                                           | <i>RFXDC2</i>          | 64864  |
| 218430_s_at  | regulatory factor X domain containing 2                                           | <i>RFXDC2</i>          | 64864  |
| 223267_at    | RNA (guanine-9-) methyltransferase domain containing 1                            | <i>RG9MTD1</i>         | 54931  |
| 230243_at    | RNA (guanine-9-) methyltransferase domain containing 2                            | <i>RG9MTD2</i>         | 93587  |
| 240166_x_at  | RNA (guanine-9-) methyltransferase domain containing 3                            | <i>RG9MTD3</i>         | 158234 |
| 1554003_at   | Rho-guanine nucleotide exchange factor                                            | <i>RGNEF</i>           | 64283  |
| 216834_at    | regulator of G-protein signaling 1                                                | <i>RGS1</i>            | 5996   |
| 204316_at    | regulator of G-protein signaling 10                                               | <i>RGS10</i>           | 6001   |
| 209638_x_at  | regulator of G-protein signaling 12                                               | <i>RGS12</i>           | 6002   |
| 210258_at    | regulator of G-protein signaling 13                                               | <i>RGS13</i>           | 6003   |
| 220334_at    | regulator of G-protein signaling 17                                               | <i>RGS17</i>           | 26575  |
| 218353_at    | regulator of G-protein signaling 5                                                | <i>RGSS5</i>           | 8490   |
| 230678_at    | Regulator of G-protein signalling 5                                               | <i>RGSS5</i>           | 8490   |
| 206145_at    | Rh-associated glycoprotein                                                        | <i>RHAG</i>            | 6005   |
| 233164_x_at  | rhomboid domain containing 1                                                      | <i>RHBDD1</i>          | 84236  |
| 217622_at    | rhomboid domain containing 3                                                      | <i>RHBDD3</i>          | 25807  |
| 219202_at    | rhomboid 5 homolog 2 (Drosophila)                                                 | <i>RHBDF2</i>          | 79651  |
| 201453_x_at  | Ras homolog enriched in brain                                                     | <i>RHEB</i>            | 6009   |
| 213404_s_at  | Ras homolog enriched in brain                                                     | <i>RHEB</i>            | 6009   |
| 1555780_a_at | Ras homolog enriched in brain                                                     | <i>RHEB</i>            | 6009   |
| 213409_s_at  | Ras homolog enriched in brain                                                     | <i>RHEB</i>            | 6009   |
| 200059_s_at  | ras homolog gene family, member A                                                 | <i>RHOA</i>            | 387    |
| 1555814_a_at | ras homolog gene family, member A                                                 | <i>RHOA</i>            | 387    |
| 212099_at    | ras homolog gene family, member B                                                 | <i>RHOB</i>            | 388    |
| 240111_at    | Rho-related BTB domain containing 3                                               | <i>RHOBTB3</i>         | 22836  |
| 216049_at    | Rho-related BTB domain containing 3                                               | <i>RHOBTB3</i>         | 22836  |
| 225202_at    | Rho-related BTB domain containing 3                                               | <i>RHOBTB3</i>         | 22836  |
| 202975_s_at  | Rho-related BTB domain containing 3                                               | <i>RHOBTB3</i>         | 22836  |
| 1554539_a_at | ras homolog gene family, member F (in filopodia)                                  | <i>RHOF</i>            | 54509  |
| 203175_at    | ras homolog gene family, member G (rho G)                                         | <i>RHOG</i>            | 391    |
| 214449_s_at  | ras homolog gene family, member Q                                                 | <i>RHOQ</i>            | 23433  |

|             |                                                                        |                 |              |
|-------------|------------------------------------------------------------------------|-----------------|--------------|
| 218323_at   | ras homolog gene family, member T1                                     | <i>RHOT1</i>    | 55288        |
| 221789_x_at | ras homolog gene family, member T2                                     | <i>RHOT2</i>    | 89941        |
| 65770_at    | ras homolog gene family, member T2                                     | <i>RHOT2</i>    | 89941        |
| 223168_at   | ras homolog gene family, member U                                      | <i>RHOU</i>     | 58480        |
| 215232_at   | Rho-type GTPase-activating protein RICH2                               | <i>RICH2</i>    | 9912         |
| 226312_at   | rapamycin-insensitive companion of mTOR                                | <i>RICTOR</i>   | 253260       |
| 226310_at   | rapamycin-insensitive companion of mTOR                                | <i>RICTOR</i>   | 253260       |
| 233781_s_at | RAP1 interacting factor homolog (yeast)                                | <i>RIF1</i>     | 55183        |
| 233780_at   | RAP1 interacting factor homolog (yeast)                                | <i>RIF1</i>     | 55183        |
| 214700_x_at | RAP1 interacting factor homolog (yeast)                                | <i>RIF1</i>     | 55183        |
| 241820_at   | RAP1 interacting factor homolog (yeast)                                | <i>RIF1</i>     | 55183        |
| 227366_at   | Rab interacting lysosomal protein                                      | <i>RILP</i>     | 83547        |
| 215478_at   | regulating synaptic membrane exocytosis 2                              | <i>RIMS2</i>    | 9699         |
| 218598_at   | RAD50 interactor 1                                                     | <i>RINT1</i>    | 60561        |
| 202130_at   | RIO kinase 3 (yeast)                                                   | <i>RIOK3</i>    | 8780         |
| 202131_s_at | RIO kinase 3 (yeast)                                                   | <i>RIOK3</i>    | 8780         |
| 202129_s_at | RIO kinase 3 (yeast)                                                   | <i>RIOK3</i>    | 8780         |
| 209545_s_at | receptor-interacting serine-threonine kinase 2                         | <i>RIPK2</i>    | 8767         |
| 214663_at   | receptor interacting protein kinase 5                                  | <i>RIPK5</i>    | 25778        |
| 229017_s_at | receptor interacting protein kinase 5                                  | <i>RIPK5</i>    | 25778        |
| 211515_s_at | receptor interacting protein kinase 5                                  | <i>RIPK5</i>    | 25778        |
| 243463_s_at | Ras-like without CAAX 1                                                | <i>RIT1</i>     | 6016         |
| 209882_at   | Ras-like without CAAX 1                                                | <i>RIT1</i>     | 6016         |
| 204243_at   | rearranged L-myc fusion                                                | <i>RLF</i>      | 6018         |
| 211753_s_at | relaxin 1                                                              | <i>RLN1</i>     | 6013         |
| 214519_s_at | relaxin 2                                                              | <i>RLN2</i>     | 6013 /// 601 |
| 218979_at   | RMI1, RecQ mediated genome instability 1, homolog (S. cerevisiae)      | <i>RMI1</i>     | 80010        |
| 212482_at   | required for meiotic nuclear division 5 homolog A (S. cerevisiae)      | <i>RMND5A</i>   | 64795        |
| 212478_at   | required for meiotic nuclear division 5 homolog A (S. cerevisiae)      | <i>RMND5A</i>   | 64795        |
| 212479_s_at | required for meiotic nuclear division 5 homolog A (S. cerevisiae)      | <i>RMND5A</i>   | 64795        |
| 1562633_at  | rhabdomyosarcoma 2 associated transcript (non-coding RNA)              | <i>RMST</i>     | 196475       |
| 206111_at   | ribonuclease, RNase A family, 2 (liver, eosinophil-derived neurotoxin) | <i>RNASE2</i>   | 100133484 ,  |
| 206851_at   | ribonuclease, RNase A family, 3 (eosinophil cationic protein)          | <i>RNASE3</i>   | 6037         |
| 213566_at   | ribonuclease, RNase A family, k6                                       | <i>RNASE6</i>   | 6039         |
| 218496_at   | ribonuclease H1                                                        | <i>RNASEH1</i>  | 246243       |
| 203022_at   | ribonuclease H2, subunit A                                             | <i>RNASEH2A</i> | 10535        |
| 215040_at   | Ribonuclease H2, subunit B                                             | <i>RNASEH2B</i> | 79621        |
| 219056_at   | ribonuclease H2, subunit B                                             | <i>RNASEH2B</i> | 79621        |
| 229285_at   | ribonuclease L (2',5'-oligoadenylate synthetase-dependent)             | <i>RNASEL</i>   | 6041         |
| 218269_at   | ribonuclease III, nuclear                                              | <i>RNASEN</i>   | 29102        |
| 1556201_at  | ribonuclease T2                                                        | <i>RNASET2</i>  | 8635         |
| 207801_s_at | ring finger protein 10                                                 | <i>RNF10</i>    | 9921         |
| 202636_at   | ring finger protein 103                                                | <i>RNF103</i>   | 7844         |
| 208924_at   | ring finger protein 11                                                 | <i>RNF11</i>    | 26994        |
| 218761_at   | ring finger protein 111                                                | <i>RNF111</i>   | 54778        |
| 224186_s_at | ring finger protein 123                                                | <i>RNF123</i>   | 63891        |
| 235199_at   | ring finger protein 125                                                | <i>RNF125</i>   | 54941        |
| 207735_at   | ring finger protein 125                                                | <i>RNF125</i>   | 54941        |
| 201780_s_at | ring finger protein 13                                                 | <i>RNF13</i>    | 11342        |
| 201779_s_at | ring finger protein 13                                                 | <i>RNF13</i>    | 11342        |
| 236292_at   | Ring finger protein 130                                                | <i>RNF130</i>   | 55819        |
| 217865_at   | ring finger protein 130                                                | <i>RNF130</i>   | 55819        |
| 223592_s_at | ring finger protein 135                                                | <i>RNF135</i>   | 84282        |
| 223591_at   | ring finger protein 135                                                | <i>RNF135</i>   | 84282        |
| 209510_at   | ring finger protein 139                                                | <i>RNF139</i>   | 11236        |
| 1565544_at  | ring finger protein 141                                                | <i>RNF141</i>   | 50862        |
| 204040_at   | ring finger protein 144A                                               | <i>RNF144A</i>  | 9781         |
| 235549_at   | ring finger 144B                                                       | <i>RNF144B</i>  | 255488       |
| 239704_at   | ring finger 144B                                                       | <i>RNF144B</i>  | 255488       |
| 226077_at   | ring finger protein 145                                                | <i>RNF145</i>   | 153830       |
| 227726_at   | ring finger protein 166                                                | <i>RNF166</i>   | 115992       |
| 226104_at   | ring finger protein 170                                                | <i>RNF170</i>   | 81790        |
| 242985_x_at | ring finger protein 180                                                | <i>RNF180</i>   | 285671       |

|              |                                                                     |                      |           |
|--------------|---------------------------------------------------------------------|----------------------|-----------|
| 242033_at    | ring finger protein 180                                             | <i>RNF180</i>        | 285671    |
| 223064_at    | ring finger protein 181                                             | <i>RNF181</i>        | 51255     |
| 230720_at    | ring finger protein 182                                             | <i>RNF182</i>        | 221687    |
| 212155_at    | ring finger protein 187                                             | <i>RNF187</i>        | 149603    |
| 223085_at    | ring finger protein 19A                                             | <i>RNF19A</i>        | 25897     |
| 220483_s_at  | ring finger protein 19A                                             | <i>RNF19A</i>        | 25897     |
| 225929_s_at  | ring finger protein 213                                             | <i>RNF213</i>        | 57674     |
| 225931_s_at  | ring finger protein 213                                             | <i>RNF213</i>        | 57674     |
| 230000_at    | ring finger protein 213                                             | <i>RNF213</i>        | 57674     |
| 204669_s_at  | ring finger protein 24                                              | <i>RNF24</i>         | 11237     |
| 206845_s_at  | ring finger protein 40                                              | <i>RNF40</i>         | 9810      |
| 201961_s_at  | ring finger protein 41                                              | <i>RNF41</i>         | 10193     |
| 201962_s_at  | ring finger protein 41                                              | <i>RNF41</i>         | 10193     |
| 203286_at    | ring finger protein 44                                              | <i>RNF44</i>         | 22838     |
| 209111_at    | ring finger protein 5                                               | <i>RNF5</i>          | 6048      |
| 210931_at    | ring finger protein (C3H2C3 type) 6                                 | <i>RNF6</i>          | 6049      |
| 1555529_at   | ribonuclease/angiogenin inhibitor 1                                 | <i>RNH1</i>          | 6050      |
| 202683_s_at  | RNA (guanine-7-) methyltransferase                                  | <i>RNMT</i>          | 8731      |
| 202684_s_at  | RNA (guanine-7-) methyltransferase                                  | <i>RNMT</i>          | 8731      |
| 229903_x_at  | RNA-binding region (RNP1, RRM) containing 3                         | <i>RNPC3</i>         | 55599     |
| 226975_at    | RNA-binding region (RNP1, RRM) containing 3                         | <i>RNPC3</i>         | 55599     |
| 231812_x_at  | RNA U, small nuclear RNA export adaptor (phosphorylation regulated) | <i>RNUXA</i>         | 51808     |
| 234405_s_at  | RNA U, small nuclear RNA export adaptor (phosphorylation regulated) | <i>RNUXA</i>         | 51808     |
| 213194_at    | roundabout, axon guidance receptor, homolog 1 (Drosophila)          | <i>ROBO1</i>         | 6091      |
| 220758_s_at  | roundabout homolog 4, magic roundabout (Drosophila)                 | <i>ROBO4</i>         | 54538     |
| 211504_x_at  | Rho-associated, coiled-coil containing protein kinase 2             | <i>ROCK2</i>         | 9475      |
| 202762_at    | Rho-associated, coiled-coil containing protein kinase 2             | <i>ROCK2</i>         | 9475      |
| 207223_s_at  | ROD1 regulator of differentiation 1 (S. pombe)                      | <i>ROD1</i>          | 9991      |
| 224617_at    | ROD1 regulator of differentiation 1 (S. pombe)                      | <i>ROD1</i>          | 9991      |
| 214697_s_at  | ROD1 regulator of differentiation 1 (S. pombe)                      | <i>ROD1</i>          | 9991      |
| 214698_at    | ROD1 regulator of differentiation 1 (S. pombe)                      | <i>ROD1</i>          | 9991      |
| 212946_at    | KIAA0564 protein                                                    | <i>RP11-125A7.3</i>  | 23078     |
| 214231_s_at  | KIAA0564 protein                                                    | <i>RP11-125A7.3</i>  | 23078     |
| 220436_at    | similar to cell recognition molecule CASPR3                         | <i>RP11-138L21.1</i> | 389722    |
| 1559884_at   | antisense noncoding RNA in the INK4 locus                           | <i>RP11-145E5.4</i>  | 100048912 |
| 1556222_at   | similar to cell division cycle 10                                   | <i>RP11-291L22.2</i> | 285961    |
| 1570250_at   | plasticity related gene 3                                           | <i>RP11-35N6.1</i>   | 54886     |
| 1555554_at   | breast cancer and salivary gland expression gene                    | <i>RP11-49G10.8</i>  | 317716    |
| 227040_at    | similar to RIKEN cDNA 8030451K01                                    | <i>RP11-50D16.3</i>  | 387921    |
| 236953_s_at  | similar to RIKEN cDNA 8030451K01                                    | <i>RP11-50D16.3</i>  | 387921    |
| 1553428_at   | hypothetical protein FLJ33708                                       | <i>RP3-398D13.1</i>  | 285780    |
| 207705_s_at  | KIAA0980 protein                                                    | <i>RP4-691N24.1</i>  | 22981     |
| 230897_at    | hypothetical protein LOC728621                                      | <i>RP4-692D3.1</i>   | 728621    |
| 215861_at    | hypothetical protein FLJ14031                                       | <i>RP4-724E16.2</i>  | 80089     |
| 224826_at    | hypothetical protein KIAA1434                                       | <i>RP5-1022P6.2</i>  | 56261     |
| 230492_s_at  | hypothetical protein KIAA1434                                       | <i>RP5-1022P6.2</i>  | 56261     |
| 48659_at     | invasion inhibitory protein 45                                      | <i>RP5-1077B9.4</i>  | 60672     |
| 224407_s_at  | serine/threonine protein kinase MST4                                | <i>RP6-213H19.1</i>  | 51765     |
| 201528_at    | replication protein A1, 70kDa                                       | <i>RPA1</i>          | 6117      |
| 201529_s_at  | replication protein A1, 70kDa                                       | <i>RPA1</i>          | 6117      |
| 222893_s_at  | RNA polymerase II associated protein 2                              | <i>RPAP2</i>         | 79871     |
| 1557984_s_at | RNA polymerase II associated protein 3                              | <i>RPAP3</i>         | 79657     |
| 218842_at    | RNA polymerase II associated protein 3                              | <i>RPAP3</i>         | 79657     |
| 235209_at    | RPE-spondin                                                         | <i>RPESP</i>         | 157869    |
| 207624_s_at  | retinitis pigmentosa GTPase regulator                               | <i>RPGR</i>          | 6103      |
| 206608_s_at  | retinitis pigmentosa GTPase regulator interacting protein 1         | <i>RPGRIP1</i>       | 57096     |
| 213959_s_at  | RPGRIP1-like                                                        | <i>RPGRIP1L</i>      | 23322     |
| 212973_at    | ribose 5-phosphate isomerase A (ribose 5-phosphate epimerase)       | <i>RPIA</i>          | 22934     |
| 215321_at    | Rap2-binding protein 9                                              | <i>RPIB9</i>         | 154661    |
| 221989_at    | ribosomal protein L10                                               | <i>RPL10</i>         | 6134      |
| 229563_s_at  | ribosomal protein L10a                                              | <i>RPL10A</i>        | 100128936 |
| 200036_s_at  | ribosomal protein L10a                                              | <i>RPL10A</i>        | 4736      |
| 208929_x_at  | ribosomal protein L13                                               | <i>RPL13</i>         | 6137      |

|             |                                                                         |                |              |
|-------------|-------------------------------------------------------------------------|----------------|--------------|
| 212734_x_at | ribosomal protein L13                                                   | <i>RPL13</i>   | 6137         |
| 221476_s_at | ribosomal protein L15                                                   | <i>RPL15</i>   | 6138         |
| 214042_s_at | ribosomal protein L22                                                   | <i>RPL22</i>   | 6146         |
| 221726_at   | ribosomal protein L22                                                   | <i>RPL22</i>   | 6146         |
| 221775_x_at | ribosomal protein L22                                                   | <i>RPL22</i>   | 6146         |
| 220960_x_at | ribosomal protein L22                                                   | <i>RPL22</i>   | 6146         |
| 225541_at   | ribosomal protein L22-like 1                                            | <i>RPL22L1</i> | 200916       |
| 215224_at   | ribosomal protein L23                                                   | <i>RPL23</i>   | 619505 /// 5 |
| 212044_s_at | Ribosomal protein L27a                                                  | <i>RPL27A</i>  | 6157         |
| 200962_at   | ribosomal protein L31                                                   | <i>RPL31</i>   | 6160         |
| 215208_x_at | Ribosomal protein L35a                                                  | <i>RPL35A</i>  | 6165         |
| 207585_s_at | ribosomal protein L36a-like                                             | <i>RPL36AL</i> | 6166         |
| 224763_at   | Ribosomal protein L37                                                   | <i>RPL37</i>   | 6167         |
| 214041_x_at | Ribosomal protein L37a                                                  | <i>RPL37A</i>  | 6168         |
| 221943_x_at | Ribosomal protein L38                                                   | <i>RPL38</i>   | 6169         |
| 200089_s_at | ribosomal protein L4                                                    | <i>RPL4</i>    | 6124         |
| 201154_x_at | ribosomal protein L4                                                    | <i>RPL4</i>    | 6124         |
| 211710_x_at | ribosomal protein L4                                                    | <i>RPL4</i>    | 6124         |
| 200937_s_at | ribosomal protein L5                                                    | <i>RPL5</i>    | 6125         |
| 224738_x_at | ribosomal protein L7-like 1                                             | <i>RPL7L1</i>  | 285855       |
| 213350_at   | Ribosomal protein S11                                                   | <i>RPS11</i>   | 6205         |
| 213377_x_at | ribosomal protein S12                                                   | <i>RPS12</i>   | 6206         |
| 201665_x_at | ribosomal protein S17                                                   | <i>RPS17</i>   | 6218         |
| 212578_x_at | ribosomal protein S17                                                   | <i>RPS17</i>   | 6218         |
| 211487_x_at | ribosomal protein S17                                                   | <i>RPS17</i>   | 6218         |
| 200949_x_at | ribosomal protein S20                                                   | <i>RPS20</i>   | 6224         |
| 200926_at   | ribosomal protein S23                                                   | <i>RPS23</i>   | 6228         |
| 1555878_at  | Ribosomal protein S24                                                   | <i>RPS24</i>   | 6229         |
| 200933_x_at | ribosomal protein S4, X-linked                                          | <i>RPS4X</i>   | 6191         |
| 213347_x_at | ribosomal protein S4, X-linked                                          | <i>RPS4X</i>   | 6191         |
| 203379_at   | ribosomal protein S6 kinase, 90kDa, polypeptide 1                       | <i>RPS6KA1</i> | 6195         |
| 204635_at   | ribosomal protein S6 kinase, 90kDa, polypeptide 5                       | <i>RPS6KA5</i> | 9252         |
| 204633_s_at | ribosomal protein S6 kinase, 90kDa, polypeptide 5                       | <i>RPS6KA5</i> | 9252         |
| 1554319_at  | ribosomal protein S6 kinase, 90kDa, polypeptide 5                       | <i>RPS6KA5</i> | 9252         |
| 1553454_at  | repetin                                                                 | <i>RPTN</i>    | 126638       |
| 201628_s_at | Ras-related GTP binding A                                               | <i>RRAGA</i>   | 10670        |
| 218088_s_at | Ras-related GTP binding C                                               | <i>RRAGC</i>   | 64121        |
| 222514_at   | Ras-related GTP binding C                                               | <i>RRAGC</i>   | 64121        |
| 221523_s_at | Ras-related GTP binding D                                               | <i>RRAGD</i>   | 58528        |
| 221524_s_at | Ras-related GTP binding D                                               | <i>RRAGD</i>   | 58528        |
| 212590_at   | related RAS viral (r-ras) oncogene homolog 2                            | <i>RRAS2</i>   | 22800        |
| 212589_at   | related RAS viral (r-ras) oncogene homolog 2                            | <i>RRAS2</i>   | 22800        |
| 228487_s_at | Ras responsive element binding protein 1                                | <i>RREB1</i>   | 6239         |
| 242297_at   | ras responsive element binding protein 1                                | <i>RREB1</i>   | 6239         |
| 201476_s_at | ribonucleotide reductase M1 polypeptide                                 | <i>RRM1</i>    | 6240         |
| 201477_s_at | ribonucleotide reductase M1 polypeptide                                 | <i>RRM1</i>    | 6240         |
| 201890_at   | ribonucleotide reductase M2 polypeptide                                 | <i>RRM2</i>    | 6241         |
| 209773_s_at | ribonucleotide reductase M2 polypeptide                                 | <i>RRM2</i>    | 6241         |
| 1559126_at  | ribosomal RNA processing 12 homolog (S. cerevisiae)                     | <i>RRP12</i>   | 23223        |
| 219037_at   | ribosomal RNA processing 15 homolog (S. cerevisiae)                     | <i>RRP15</i>   | 51018        |
| 212846_at   | ribosomal RNA processing 1 homolog B (S. cerevisiae)                    | <i>RRP1B</i>   | 23076        |
| 242625_at   | radical S-adenosyl methionine domain containing 2                       | <i>RSAD2</i>   | 91543        |
| 213797_at   | radical S-adenosyl methionine domain containing 2                       | <i>RSAD2</i>   | 91543        |
| 222791_at   | round spermatid basic protein 1                                         | <i>RSBN1</i>   | 54665        |
| 232221_x_at | round spermatid basic protein 1-like                                    | <i>RSBN1L</i>  | 222194       |
| 226387_at   | round spermatid basic protein 1-like                                    | <i>RSBN1L</i>  | 222194       |
| 218166_s_at | remodeling and spacing factor 1                                         | <i>RSF1</i>    | 51773        |
| 219507_at   | arginine/serine-rich coiled-coil 1                                      | <i>RSRC1</i>   | 51319        |
| 202302_s_at | arginine/serine-rich coiled-coil 2                                      | <i>RSRC2</i>   | 65117        |
| 230490_x_at | Ras suppressor protein 1                                                | <i>RSU1</i>    | 6251         |
| 201980_s_at | Ras suppressor protein 1                                                | <i>RSU1</i>    | 6251         |
| 212301_at   | Rtf1, Paf1/RNA polymerase II complex component, homolog (S. cerevisiae) | <i>RTF1</i>    | 23168        |
| 230832_at   | Rtf1, Paf1/RNA polymerase II complex component, homolog (S. cerevisiae) | <i>RTF1</i>    | 23168        |

|              |                                                                              |                |        |
|--------------|------------------------------------------------------------------------------|----------------|--------|
| 203485_at    | reticulon 1                                                                  | <i>RTN1</i>    | 6252   |
| 224564_s_at  | reticulon 3                                                                  | <i>RTN3</i>    | 10313  |
| 219684_at    | receptor (chemosensory) transporter protein 4                                | <i>RTP4</i>    | 64108  |
| 1553277_at   | rotatin                                                                      | <i>RTTN</i>    | 25914  |
| 1557388_at   | rotatin                                                                      | <i>RTTN</i>    | 25914  |
| 233191_at    | RUN and FYVE domain containing 2                                             | <i>RUFY2</i>   | 55680  |
| 226298_at    | RUN domain containing 1                                                      | <i>RUNDC1</i>  | 146923 |
| 235040_at    | RUN domain containing 1                                                      | <i>RUNDC1</i>  | 146923 |
| 1564642_at   | runt-related transcription factor 1; translocated to, 1 (cyclin D-related)   | <i>RUNX1T1</i> | 862    |
| 232231_at    | runt-related transcription factor 2                                          | <i>RUNX2</i>   | 860    |
| 204198_s_at  | runt-related transcription factor 3                                          | <i>RUNX3</i>   | 864    |
| 205087_at    | RWD domain containing 3                                                      | <i>RWDD3</i>   | 25950  |
| 225574_at    | RWD domain containing 4A                                                     | <i>RWDD4A</i>  | 201965 |
| 202426_s_at  | retinoid X receptor, alpha                                                   | <i>RXRA</i>    | 6256   |
| 201845_s_at  | RING1 and YY1 binding protein                                                | <i>RYBP</i>    | 23429  |
| 201844_s_at  | RING1 and YY1 binding protein                                                | <i>RYBP</i>    | 23429  |
| 201846_s_at  | RING1 and YY1 binding protein                                                | <i>RYBP</i>    | 23429  |
| 206306_at    | ryanodine receptor 3                                                         | <i>RYR3</i>    | 6263   |
| 200660_at    | S100 calcium binding protein A11                                             | <i>S100A11</i> | 6282   |
| 205863_at    | S100 calcium binding protein A12                                             | <i>S100A12</i> | 6283   |
| 203186_s_at  | S100 calcium binding protein A4                                              | <i>S100A4</i>  | 6275   |
| 217728_at    | S100 calcium binding protein A6                                              | <i>S100A6</i>  | 6277   |
| 232170_at    | S100 calcium binding protein A7A                                             | <i>S100A7A</i> | 338324 |
| 214370_at    | S100 calcium binding protein A8                                              | <i>S100A8</i>  | 6279   |
| 202917_s_at  | S100 calcium binding protein A8                                              | <i>S100A8</i>  | 6279   |
| 203535_at    | S100 calcium binding protein A9                                              | <i>S100A9</i>  | 6280   |
| 218370_s_at  | S100P binding protein                                                        | <i>S100PBP</i> | 64766  |
| 1554876_a_at | S100 calcium binding protein Z                                               | <i>S100Z</i>   | 170591 |
| 207096_at    | serum amyloid A4, constitutive                                               | <i>SAA4</i>    | 6291   |
| 213262_at    | spastic ataxia of Charlevoix-Saguenay (sacsin)                               | <i>SACS</i>    | 26278  |
| 217946_s_at  | SUMO1 activating enzyme subunit 1                                            | <i>SAE1</i>    | 10055  |
| 1555618_s_at | SUMO1 activating enzyme subunit 1                                            | <i>SAE1</i>    | 10055  |
| 201177_s_at  | SUMO1 activating enzyme subunit 2                                            | <i>SAE2</i>    | 10054  |
| 229587_at    | SUMO1 activating enzyme subunit 2                                            | <i>SAE2</i>    | 10054  |
| 201747_s_at  | scaffold attachment factor B                                                 | <i>SAFB</i>    | 6294   |
| 229402_at    | sterile alpha motif domain containing 13                                     | <i>SAMD13</i>  | 148418 |
| 236782_at    | sterile alpha motif domain containing 3                                      | <i>SAMD3</i>   | 154075 |
| 229871_at    | sterile alpha motif domain containing 4B                                     | <i>SAMD4B</i>  | 55095  |
| 226714_at    | sterile alpha motif domain containing 4B                                     | <i>SAMD4B</i>  | 55095  |
| 220457_at    | sterile alpha motif domain containing 4B                                     | <i>SAMD4B</i>  | 55095  |
| 228531_at    | sterile alpha motif domain containing 9                                      | <i>SAMD9</i>   | 54809  |
| 219691_at    | sterile alpha motif domain containing 9                                      | <i>SAMD9</i>   | 54809  |
| 226603_at    | sterile alpha motif domain containing 9-like                                 | <i>SAMD9L</i>  | 219285 |
| 230036_at    | sterile alpha motif domain containing 9-like                                 | <i>SAMD9L</i>  | 219285 |
| 235643_at    | sterile alpha motif domain containing 9-like                                 | <i>SAMD9L</i>  | 219285 |
| 204502_at    | SAM domain and HD domain 1                                                   | <i>SAMHD1</i>  | 25939  |
| 1559883_s_at | SAM domain and HD domain 1                                                   | <i>SAMHD1</i>  | 25939  |
| 201570_at    | sorting and assembly machinery component 50 homolog ( <i>S. cerevisiae</i> ) | <i>SAMM50</i>  | 25813  |
| 220330_s_at  | SAM domain, SH3 domain and nuclear localization signals 1                    | <i>SAMSN1</i>  | 64092  |
| 1555638_a_at | SAM domain, SH3 domain and nuclear localization signals 1                    | <i>SAMSN1</i>  | 64092  |
| 220367_s_at  | Sin3A-associated protein, 130kDa                                             | <i>SAP130</i>  | 79595  |
| 208742_s_at  | Sin3A-associated protein, 18kDa                                              | <i>SAP18</i>   | 10284  |
| 204900_x_at  | Sin3A-associated protein, 30kDa                                              | <i>SAP30</i>   | 8819   |
| 204899_s_at  | Sin3A-associated protein, 30kDa                                              | <i>SAP30</i>   | 8819   |
| 222467_s_at  | SAPS domain family, member 3                                                 | <i>SAPS3</i>   | 55291  |
| 201542_at    | SAR1 gene homolog A ( <i>S. cerevisiae</i> )                                 | <i>SAR1A</i>   | 56681  |
| 201543_s_at  | SAR1 gene homolog A ( <i>S. cerevisiae</i> )                                 | <i>SAR1A</i>   | 56681  |
| 210790_s_at  | SAR1 gene homolog A ( <i>S. cerevisiae</i> )                                 | <i>SAR1A</i>   | 56681  |
| 1554482_a_at | SAR1 gene homolog B ( <i>S. cerevisiae</i> )                                 | <i>SAR1B</i>   | 51128  |
| 218254_s_at  | SAR1 gene homolog B ( <i>S. cerevisiae</i> )                                 | <i>SAR1B</i>   | 51128  |
| 223512_at    | SAR1 gene homolog B ( <i>S. cerevisiae</i> )                                 | <i>SAR1B</i>   | 51128  |
| 200802_at    | seryl-tRNA synthetase                                                        | <i>SARS</i>    | 6301   |
| 209486_at    | disrupter of silencing 10                                                    | <i>SAS10</i>   | 57050  |

|              |                                                                                |          |        |
|--------------|--------------------------------------------------------------------------------|----------|--------|
| 210592_s_at  | spermidine/spermine N1-acetyltransferase 1                                     | SAT1     | 6303   |
| 213988_s_at  | spermidine/spermine N1-acetyltransferase 1                                     | SAT1     | 6303   |
| 225272_at    | spermidine/spermine N1-acetyltransferase 2                                     | SAT2     | 112483 |
| 213435_at    | SATB homeobox 2                                                                | SATB2    | 23314  |
| 234491_s_at  | salvador homolog 1 (Drosophila)                                                | SAV1     | 60485  |
| 222573_s_at  | salvador homolog 1 (Drosophila)                                                | SAV1     | 60485  |
| 233914_s_at  | SET binding factor 2                                                           | SBF2     | 81846  |
| 226169_at    | SET binding factor 2                                                           | SBF2     | 81846  |
| 242935_at    | SET binding factor 2                                                           | SBF2     | 81846  |
| 218737_at    | strawberry notch homolog 1 (Drosophila)                                        | SBNO1    | 55206  |
| 204166_at    | strawberry notch homolog 2 (Drosophila)                                        | SBNO2    | 22904  |
| 206667_s_at  | secretory carrier membrane protein 1                                           | SCAMP1   | 9522   |
| 206668_s_at  | secretory carrier membrane protein 1                                           | SCAMP1   | 9522   |
| 212425_at    | secretory carrier membrane protein 1                                           | SCAMP1   | 9522   |
| 1552978_a_at | secretory carrier membrane protein 1                                           | SCAMP1   | 9522   |
| 213244_at    | secretory carrier membrane protein 4                                           | SCAMP4   | 113178 |
| 231059_x_at  | SCAN domain containing 1                                                       | SCAND1   | 51282  |
| 212329_at    | SREBF chaperone                                                                | SCAP     | 22937  |
| 209741_x_at  | S phase cyclin A-associated protein in the ER                                  | SCAPER   | 49855  |
| 224983_at    | scavenger receptor class B, member 2                                           | SCARB2   | 950    |
| 201647_s_at  | scavenger receptor class B, member 2                                           | SCARB2   | 950    |
| 201646_at    | scavenger receptor class B, member 2                                           | SCARB2   | 950    |
| 206995_x_at  | scavenger receptor class F, member 1                                           | SCARF1   | 8578   |
| 1555021_a_at | scavenger receptor class F, member 1                                           | SCARF1   | 8578   |
| 200832_s_at  | stearoyl-CoA desaturase (delta-9-desaturase)                                   | SCD      | 6319   |
| 220232_at    | stearoyl-CoA desaturase 5                                                      | SCD5     | 79966  |
| 1569495_at   | sodium channel and clathrin linker 1                                           | SCLT1    | 132320 |
| 236487_at    | sodium channel and clathrin linker 1                                           | SCLT1    | 132320 |
| 218793_s_at  | sex comb on midleg-like 1 (Drosophila)                                         | SCML1    | 6322   |
| 229057_at    | sodium channel, voltage-gated, type II, alpha subunit                          | SCN2A    | 6326   |
| 218672_at    | sodium channel modifier 1                                                      | SCNM1    | 79005  |
| 205241_at    | SCO cytochrome oxidase deficient homolog 2 (yeast)                             | SCO2     | 9997   |
| 222986_s_at  | scotin                                                                         | SCOTIN   | 51246  |
| 211733_x_at  | sterol carrier protein 2                                                       | SCP2     | 6342   |
| 201339_s_at  | sterol carrier protein 2                                                       | SCP2     | 6342   |
| 218217_at    | serine carboxypeptidase 1                                                      | SCPEP1   | 59342  |
| 222849_s_at  | secernin 3                                                                     | SCRN3    | 79634  |
| 202541_at    | small inducible cytokine subfamily E, member 1 (endothelial monocyte-activatin | SCYE1    | 9255   |
| 224960_at    | SCY1-like 2 (S. cerevisiae)                                                    | SCYL2    | 55681  |
| 41329_at     | SCY1-like 3 (S. cerevisiae)                                                    | SCYL3    | 57147  |
| 205607_s_at  | SCY1-like 3 (S. cerevisiae)                                                    | SCYL3    | 57147  |
| 218607_s_at  | SDA1 domain containing 1                                                       | SDAD1    | 55153  |
| 212157_at    | syndecan 2                                                                     | SDC2     | 6383   |
| 212154_at    | syndecan 2                                                                     | SDC2     | 6383   |
| 212158_at    | syndecan 2                                                                     | SDC2     | 6383   |
| 200958_s_at  | syndecan binding protein (syntenin)                                            | SDCBP    | 6386   |
| 1569594_a_at | serologically defined colon cancer antigen 1                                   | SDCCAG1  | 9147   |
| 1555495_a_at | serologically defined colon cancer antigen 10                                  | SDCCAG10 | 10283  |
| 243772_at    | serologically defined colon cancer antigen 8                                   | SDCCAG8  | 10806  |
| 218681_s_at  | stromal cell-derived factor 2-like 1                                           | SDF2L1   | 23753  |
| 224472_x_at  | stromal cell derived factor 4                                                  | SDF4     | 51150  |
| 221972_s_at  | stromal cell derived factor 4                                                  | SDF4     | 51150  |
| 232032_x_at  | stromal cell derived factor 4                                                  | SDF4     | 51150  |
| 202675_at    | succinate dehydrogenase complex, subunit B, iron sulfur (lp)                   | SDHB     | 6390   |
| 238056_at    | succinate dehydrogenase complex, subunit C, integral membrane protein, 15kD    | SDHC     | 6391   |
| 202026_at    | succinate dehydrogenase complex, subunit D, integral membrane protein          | SDHD     | 6392   |
| 207707_s_at  | SEC13 homolog (S. cerevisiae)                                                  | SEC13    | 6396   |
| 202084_s_at  | SEC14-like 1 (S. cerevisiae)                                                   | SEC14L1  | 6397   |
| 202082_s_at  | SEC14-like 1 (S. cerevisiae)                                                   | SEC14L1  | 6397   |
| 202083_s_at  | SEC14-like 1 (S. cerevisiae)                                                   | SEC14L1  | 6397   |
| 215696_s_at  | SEC16 homolog A (S. cerevisiae)                                                | SEC16A   | 9919   |
| 1555289_at   | SEC16 homolog B (S. cerevisiae)                                                | SEC16B   | 89866  |
| 218703_at    | SEC22 vesicle trafficking protein homolog A (S. cerevisiae)                    | SEC22A   | 26984  |



|              |                                                                                              |                                 |              |
|--------------|----------------------------------------------------------------------------------------------|---------------------------------|--------------|
| 209206_at    | SEC22 vesicle trafficking protein homolog B ( <i>S. cerevisiae</i> )                         | <i>SEC22B</i>                   | 9554         |
| 210293_s_at  | Sec23 homolog B ( <i>S. cerevisiae</i> )                                                     | <i>SEC23B</i>                   | 10483        |
| 201583_s_at  | Sec23 homolog B ( <i>S. cerevisiae</i> )                                                     | <i>SEC23B</i>                   | 10483        |
| 212900_at    | SEC24 related gene family, member A ( <i>S. cerevisiae</i> )                                 | <i>SEC24A</i>                   | 10802        |
| 212902_at    | SEC24 related gene family, member A ( <i>S. cerevisiae</i> )                                 | <i>SEC24A</i>                   | 10802        |
| 244841_at    | SEC24 related gene family, member A ( <i>S. cerevisiae</i> )                                 | <i>SEC24A</i>                   | 10802        |
| 202798_at    | SEC24 related gene family, member B ( <i>S. cerevisiae</i> )                                 | <i>SEC24B</i>                   | 10427        |
| 202361_at    | SEC24 related gene family, member C ( <i>S. cerevisiae</i> )                                 | <i>SEC24C</i>                   | 9632         |
| 202375_at    | SEC24 related gene family, member D ( <i>S. cerevisiae</i> )                                 | <i>SEC24D</i>                   | 9871         |
| 215009_s_at  | SEC31 homolog A ( <i>S. cerevisiae</i> )                                                     | <i>SEC31A</i>                   | 22872        |
| 222385_x_at  | Sec61 alpha 1 subunit ( <i>S. cerevisiae</i> )                                               | <i>SEC61A1</i>                  | 29927        |
| 217716_s_at  | Sec61 alpha 1 subunit ( <i>S. cerevisiae</i> )                                               | <i>SEC61A1</i>                  | 29927        |
| 219499_at    | Sec61 alpha 2 subunit ( <i>S. cerevisiae</i> )                                               | <i>SEC61A2</i>                  | 55176        |
| 203133_at    | Sec61 beta subunit                                                                           | <i>SEC61B</i>                   | 10952        |
| 203484_at    | Sec61 gamma subunit                                                                          | <i>SEC61G</i>                   | 23480        |
| 224250_s_at  | SECIS binding protein 2                                                                      | <i>SECISBP2</i>                 | 79048        |
| 221931_s_at  | SEH1-like ( <i>S. cerevisiae</i> )                                                           | <i>SEH1L</i>                    | 81929        |
| 202061_s_at  | sel-1 suppressor of lin-12-like ( <i>C. elegans</i> )                                        | <i>SEL1L</i>                    | 6400         |
| 202062_s_at  | sel-1 suppressor of lin-12-like ( <i>C. elegans</i> )                                        | <i>SEL1L</i>                    | 6400         |
| 223070_at    | selenoprotein K                                                                              | <i>SELK</i>                     | 58515        |
| 204563_at    | selectin L (lymphocyte adhesion molecule 1)                                                  | <i>SELL</i>                     | 6402         |
| 226051_at    | selenoprotein M                                                                              | <i>SELM</i>                     | 140606       |
| 209880_s_at  | selectin P ligand                                                                            | <i>SELPLG</i>                   | 6404         |
| 209879_at    | selectin P ligand                                                                            | <i>SELPLG</i>                   | 6404         |
| 217811_at    | selenoprotein T                                                                              | <i>SELT</i>                     | 51714        |
| 203789_s_at  | sema domain, immunoglobulin domain (Ig), short basic domain, secreted, (sem: <i>SEMA3C</i> ) |                                 | 10512        |
| 203788_s_at  | sema domain, immunoglobulin domain (Ig), short basic domain, secreted, (sem: <i>SEMA3C</i> ) |                                 | 10512        |
| 223449_at    | sema domain, transmembrane domain (TM), and cytoplasmic domain, (semaph <i>SEMA6A</i> )      |                                 | 57556        |
| 206442_at    | semenogelin I                                                                                | <i>SEMG1</i>                    | 6406         |
| 218122_s_at  | SUMO1/sentrin/SMT3 specific peptidase 2                                                      | <i>SENP2</i>                    | 59343        |
| 202319_at    | SUMO1/sentrin specific peptidase 6                                                           | <i>SENP6</i>                    | 26054        |
| 202318_s_at  | SUMO1/sentrin specific peptidase 6                                                           | <i>SENP6</i>                    | 26054        |
| 214790_at    | SUMO1/sentrin specific peptidase 6                                                           | <i>SENP6</i>                    | 26054        |
| 208939_at    | selenophosphate synthetase 1                                                                 | <i>SEPHS1</i>                   | 22929        |
| 237475_x_at  | Selenoprotein P, plasma, 1                                                                   | <i>SEPP1</i>                    | 100129792    |
| 235516_at    | Sep (O-phosphoserine) tRNA:Sec (selenocysteine) tRNA synthase                                | <i>SEPSECS</i>                  | 51091        |
| 201194_at    | selenoprotein W, 1                                                                           | <i>SEPW1</i>                    | 6415         |
| 210076_x_at  | SERPINE1 mRNA binding protein 1                                                              | <i>SERBP1</i>                   | 26135        |
| 227369_at    | SERPINE1 mRNA binding protein 1                                                              | <i>SERBP1</i>                   | 26135        |
| 228129_at    | SERPINE1 mRNA binding protein 1                                                              | <i>SERBP1</i>                   | 26135        |
| 223538_at    | small EDRK-rich factor 1A (telomeric) /// small EDRK-rich factor 1B (centromeric             | <i>SERF1A</i> /// <i>SERF1B</i> | 728492 /// 8 |
| 224625_x_at  | small EDRK-rich factor 2                                                                     | <i>SERF2</i>                    | 10169 /// 25 |
| 217756_x_at  | small EDRK-rich factor 2                                                                     | <i>SERF2</i>                    | 10169 /// 25 |
| 239114_at    | Secretion regulating guanine nucleotide exchange factor                                      | <i>SERGEF</i>                   | 26297        |
| 208671_at    | serine incorporator 1                                                                        | <i>SERINC1</i>                  | 57515        |
| 221472_at    | serine incorporator 3                                                                        | <i>SERINC3</i>                  | 10955        |
| 211769_x_at  | serine incorporator 3                                                                        | <i>SERINC3</i>                  | 10955        |
| 221473_x_at  | serine incorporator 3                                                                        | <i>SERINC3</i>                  | 10955        |
| 221471_at    | serine incorporator 3                                                                        | <i>SERINC3</i>                  | 10955        |
| 235475_at    | Stress-associated endoplasmic reticulum protein 1                                            | <i>SERP1</i>                    | 100129720    |
| 200970_s_at  | stress-associated endoplasmic reticulum protein 1                                            | <i>SERP1</i>                    | 27230        |
| 200971_s_at  | stress-associated endoplasmic reticulum protein 1                                            | <i>SERP1</i>                    | 27230        |
| 212268_at    | serpin peptidase inhibitor, clade B (ovalbumin), member 1                                    | <i>SERPINB1</i>                 | 1992         |
| 217272_s_at  | serpin peptidase inhibitor, clade B (ovalbumin), member 13                                   | <i>SERPINB13</i>                | 5275         |
| 1556950_s_at | serpin peptidase inhibitor, clade B (ovalbumin), member 6                                    | <i>SERPINB6</i>                 | 5269         |
| 211474_s_at  | serpin peptidase inhibitor, clade B (ovalbumin), member 6                                    | <i>SERPINB6</i>                 | 5269         |
| 206034_at    | serpin peptidase inhibitor, clade B (ovalbumin), member 8                                    | <i>SERPINB8</i>                 | 5271         |
| 209723_at    | serpin peptidase inhibitor, clade B (ovalbumin), member 9                                    | <i>SERPINB9</i>                 | 5272         |
| 209722_s_at  | serpin peptidase inhibitor, clade B (ovalbumin), member 9                                    | <i>SERPINB9</i>                 | 5272         |
| 242814_at    | serpin peptidase inhibitor, clade B (ovalbumin), member 9                                    | <i>SERPINB9</i>                 | 5272         |
| 202628_s_at  | serpin peptidase inhibitor, clade E (nexin, plasminogen activator inhibitor type 1           | <i>SERPINE1</i>                 | 5054         |
| 202627_s_at  | serpin peptidase inhibitor, clade E (nexin, plasminogen activator inhibitor type 1           | <i>SERPINE1</i>                 | 5054         |
| 212190_at    | serpin peptidase inhibitor, clade E (nexin, plasminogen activator inhibitor type 1           | <i>SERPINE2</i>                 | 5270         |

|              |                                                                                                   |                |        |
|--------------|---------------------------------------------------------------------------------------------------|----------------|--------|
| 200986_at    | serpin peptidase inhibitor, clade G (C1 inhibitor), member 1, (angioedema, here <i>SERPING1</i> ) |                | 710    |
| 223394_at    | SERTA domain containing 1                                                                         | <i>SERTAD1</i> | 29950  |
| 202656_s_at  | SERTA domain containing 2                                                                         | <i>SERTAD2</i> | 9792   |
| 202657_s_at  | SERTA domain containing 2                                                                         | <i>SERTAD2</i> | 9792   |
| 219382_at    | SERTA domain containing 3                                                                         | <i>SERTAD3</i> | 29946  |
| 229674_at    | SERTA domain containing 4                                                                         | <i>SERTAD4</i> | 56256  |
| 235684_s_at  | sestrin 3                                                                                         | <i>SESN3</i>   | 143686 |
| 213047_x_at  | SET translocation (myeloid leukemia-associated)                                                   | <i>SET</i>     | 6418   |
| 200631_s_at  | SET translocation (myeloid leukemia-associated)                                                   | <i>SET</i>     | 6418   |
| 1569106_s_at | SET domain containing 5                                                                           | <i>SETD5</i>   | 55209  |
| 221806_s_at  | SET domain containing 5                                                                           | <i>SETD5</i>   | 55209  |
| 235339_at    | SET domain, bifurcated 2                                                                          | <i>SETDB2</i>  | 83852  |
| 235338_s_at  | SET domain, bifurcated 2                                                                          | <i>SETDB2</i>  | 83852  |
| 238406_x_at  | seizure related 6 homolog (mouse)-like 2                                                          | <i>SEZ6L2</i>  | 26470  |
| 201356_at    | splicing factor 3a, subunit 1, 120kDa                                                             | <i>SF3A1</i>   | 10291  |
| 201357_s_at  | splicing factor 3a, subunit 1, 120kDa                                                             | <i>SF3A1</i>   | 10291  |
| 216457_s_at  | splicing factor 3a, subunit 1, 120kDa                                                             | <i>SF3A1</i>   | 10291  |
| 37462_i_at   | splicing factor 3a, subunit 2, 66kDa                                                              | <i>SF3A2</i>   | 8175   |
| 203818_s_at  | splicing factor 3a, subunit 3, 60kDa                                                              | <i>SF3A3</i>   | 10946  |
| 201071_x_at  | splicing factor 3b, subunit 1, 155kDa                                                             | <i>SF3B1</i>   | 23451  |
| 201070_x_at  | splicing factor 3b, subunit 1, 155kDa                                                             | <i>SF3B1</i>   | 23451  |
| 214305_s_at  | splicing factor 3b, subunit 1, 155kDa                                                             | <i>SF3B1</i>   | 23451  |
| 223416_at    | splicing factor 3B, 14 kDa subunit                                                                | <i>SF3B14</i>  | 51639  |
| 1558230_at   | splicing factor 3b, subunit 2, 145kDa                                                             | <i>SF3B2</i>   | 10992  |
| 200619_at    | splicing factor 3b, subunit 2, 145kDa                                                             | <i>SF3B2</i>   | 10992  |
| 221263_s_at  | splicing factor 3b, subunit 5, 10kDa                                                              | <i>SF3B5</i>   | 83443  |
| 213370_s_at  | Scm-like with four mbt domains 1                                                                  | <i>SFMBT1</i>  | 51460  |
| 33323_r_at   | stratifin                                                                                         | <i>SFN</i>     | 2810   |
| 201585_s_at  | splicing factor proline/glutamine-rich (polypyrimidine tract binding protein asso                 | <i>SFPQ</i>    | 6421   |
| 221768_at    | Splicing factor proline/glutamine-rich (polypyrimidine tract binding protein asso                 | <i>SFPQ</i>    | 6421   |
| 200685_at    | splicing factor, arginine/serine-rich 11                                                          | <i>SFRS11</i>  | 9295   |
| 213742_at    | splicing factor, arginine/serine-rich 11                                                          | <i>SFRS11</i>  | 9295   |
| 1568783_at   | Splicing factor, arginine/serine-rich 12                                                          | <i>SFRS12</i>  | 140890 |
| 212721_at    | splicing factor, arginine/serine-rich 12                                                          | <i>SFRS12</i>  | 140890 |
| 238781_at    | splicing factor, arginine/serine-rich 12                                                          | <i>SFRS12</i>  | ---    |
| 235611_at    | splicing factor, arginine/serine-rich 12                                                          | <i>SFRS12</i>  | ---    |
| 226082_s_at  | splicing factor, arginine/serine-rich 15                                                          | <i>SFRS15</i>  | 57466  |
| 203624_at    | splicing factor, arginine/serine-rich 17A                                                         | <i>SFRS17A</i> | 8227   |
| 230375_at    | splicing factor, arginine/serine-rich 18                                                          | <i>SFRS18</i>  | 25957  |
| 214789_x_at  | splicing factor, arginine/serine-rich 2B                                                          | <i>SFRS2B</i>  | 10929  |
| 228760_at    | splicing factor, arginine/serine-rich 2B                                                          | <i>SFRS2B</i>  | 10929  |
| 206989_s_at  | splicing factor, arginine/serine-rich 2, interacting protein                                      | <i>SFRS2IP</i> | 9169   |
| 232392_at    | Splicing factor, arginine/serine-rich 3                                                           | <i>SFRS3</i>   | 6428   |
| 208672_s_at  | splicing factor, arginine/serine-rich 3                                                           | <i>SFRS3</i>   | 6428   |
| 202899_s_at  | splicing factor, arginine/serine-rich 3                                                           | <i>SFRS3</i>   | 6428   |
| 208673_s_at  | splicing factor, arginine/serine-rich 3                                                           | <i>SFRS3</i>   | 6428   |
| 201696_at    | splicing factor, arginine/serine-rich 4                                                           | <i>SFRS4</i>   | 6429   |
| 210077_s_at  | splicing factor, arginine/serine-rich 5                                                           | <i>SFRS5</i>   | 6430   |
| 201129_at    | splicing factor, arginine/serine-rich 7, 35kDa                                                    | <i>SFRS7</i>   | 6432   |
| 202773_s_at  | splicing factor, arginine/serine-rich 8 (suppressor-of-white-apricot homolog, Drc                 | <i>SFRS8</i>   | 6433   |
| 225850_at    | SFT2 domain containing 1                                                                          | <i>SFT2D1</i>  | 113402 |
| 225849_s_at  | SFT2 domain containing 1                                                                          | <i>SFT2D1</i>  | 113402 |
| 226639_at    | SFT2 domain containing 3                                                                          | <i>SFT2D3</i>  | 84826  |
| 213936_x_at  | surfactant, pulmonary-associated protein B                                                        | <i>SFTPB</i>   | 6439   |
| 218392_x_at  | sideroflexin 1                                                                                    | <i>SFXN1</i>   | 94081  |
| 220974_x_at  | sideroflexin 3                                                                                    | <i>SFXN3</i>   | 81855  |
| 217226_s_at  | sideroflexin 3                                                                                    | <i>SFXN3</i>   | 81855  |
| 228602_at    | sarcoglycan, delta (35kDa dystrophin-associated glycoprotein)                                     | <i>SGCD</i>    | 6444   |
| 204688_at    | sarcoglycan, epsilon                                                                              | <i>SGCE</i>    | 8910   |
| 201739_at    | serum/glucocorticoid regulated kinase                                                             | <i>SGK</i>     | 6446   |
| 225913_at    | NKF3 kinase family member                                                                         | <i>SGK269</i>  | 79834  |
| 243141_at    | sphingomyelin synthase 2                                                                          | <i>SGMS2</i>   | 166929 |
| 235425_at    | shugoshin-like 2 (S. pombe)                                                                       | <i>SGOL2</i>   | 151246 |

|              |                                                                                          |                 |        |
|--------------|------------------------------------------------------------------------------------------|-----------------|--------|
| 230165_at    | shugoshin-like 2 ( <i>S. pombe</i> )                                                     | <i>SGOL2</i>    | 151246 |
| 212321_at    | sphingosine-1-phosphate lyase 1                                                          | <i>SGPL1</i>    | 8879   |
| 223391_at    | sphingosine-1-phosphate phosphatase 1                                                    | <i>SGPP1</i>    | 81537  |
| 221268_s_at  | sphingosine-1-phosphate phosphatase 1                                                    | <i>SGPP1</i>    | 81537  |
| 238567_at    | sphingosine-1-phosphate phosphatase 2                                                    | <i>SGPP2</i>    | 130367 |
| 244780_at    | sphingosine-1-phosphate phosphatase 2                                                    | <i>SGPP2</i>    | 130367 |
| 35626_at     | N-sulfoglucosamine sulfohydrolase (sulfamidase)                                          | <i>SGSH</i>     | 6448   |
| 204293_at    | N-sulfoglucosamine sulfohydrolase (sulfamidase)                                          | <i>SGSH</i>     | 6448   |
| 217538_at    | small G protein signaling modulator 2                                                    | <i>SGSM2</i>    | 9905   |
| 232084_at    | small glutamine-rich tetratricopeptide repeat (TPR)-containing, beta                     | <i>SGTB</i>     | 54557  |
| 228745_at    | small glutamine-rich tetratricopeptide repeat (TPR)-containing, beta                     | <i>SGTB</i>     | 54557  |
| 40149_at     | SH2B adaptor protein 1                                                                   | <i>SH2B1</i>    | 25970  |
| 203320_at    | SH2B adaptor protein 3                                                                   | <i>SH2B3</i>    | 10019  |
| 210116_at    | SH2 domain protein 1A, Duncan's disease (lymphoproliferative syndrome)                   | <i>SH2D1A</i>   | 4068   |
| 1553177_at   | SH2 domain containing 1B                                                                 | <i>SH2D1B</i>   | 117157 |
| 219513_s_at  | SH2 domain containing 3A                                                                 | <i>SH2D3A</i>   | 10045  |
| 222169_x_at  | SH2 domain containing 3A                                                                 | <i>SH2D3A</i>   | 10045  |
| 1563849_at   | SH2 domain containing 4B                                                                 | <i>SH2D4B</i>   | 387694 |
| 242543_at    | SH2 domain containing 6                                                                  | <i>SH2D6</i>    | 284948 |
| 204979_s_at  | SH3 domain binding glutamic acid-rich protein                                            | <i>SH3BGR</i>   | 6450   |
| 201312_s_at  | SH3 domain binding glutamic acid-rich protein like                                       | <i>SH3BGRL</i>  | 6451   |
| 211250_s_at  | SH3-domain binding protein 2                                                             | <i>SH3BP2</i>   | 6452   |
| 209370_s_at  | SH3-domain binding protein 2                                                             | <i>SH3BP2</i>   | 6452   |
| 201810_s_at  | SH3-domain binding protein 5 (BTK-associated)                                            | <i>SH3BP5</i>   | 9467   |
| 201811_x_at  | SH3-domain binding protein 5 (BTK-associated)                                            | <i>SH3BP5</i>   | 9467   |
| 227591_at    | SH3-domain binding protein 5 (BTK-associated)                                            | <i>SH3BP5</i>   | ---    |
| 201851_at    | SH3-domain GRB2-like 1                                                                   | <i>SH3GL1</i>   | 6455   |
| 211565_at    | SH3-domain GRB2-like 3                                                                   | <i>SH3GL3</i>   | 6457   |
| 210101_x_at  | SH3-domain GRB2-like endophilin B1                                                       | <i>SH3GLB1</i>  | 51100  |
| 209091_s_at  | SH3-domain GRB2-like endophilin B1                                                       | <i>SH3GLB1</i>  | 51100  |
| 224907_s_at  | SH3-domain GRB2-like endophilin B2                                                       | <i>SH3GLB2</i>  | 56904  |
| 213307_at    | SH3 and multiple ankyrin repeat domains 2                                                | <i>SHANK2</i>   | 22941  |
| 213308_at    | SH3 and multiple ankyrin repeat domains 2                                                | <i>SHANK2</i>   | 22941  |
| 214853_s_at  | SHC (Src homology 2 domain containing) transforming protein 1                            | <i>SHC1</i>     | 6464   |
| 201469_s_at  | SHC (Src homology 2 domain containing) transforming protein 1                            | <i>SHC1</i>     | 6464   |
| 202777_at    | soc-2 suppressor of clear homolog ( <i>C. elegans</i> )                                  | <i>SHOC2</i>    | 8036   |
| 226366_at    | SNF2 histone linker PHD RING helicase                                                    | <i>SHPRH</i>    | 257218 |
| 206664_at    | sucrase-isomaltase (alpha-glucosidase)                                                   | <i>SI</i>       | 6476   |
| 202981_x_at  | seven in absentia homolog 1 ( <i>Drosophila</i> )                                        | <i>SIAH1</i>    | 6477   |
| 202980_s_at  | seven in absentia homolog 1 ( <i>Drosophila</i> )                                        | <i>SIAH1</i>    | 6477   |
| 209339_at    | seven in absentia homolog 2 ( <i>Drosophila</i> )                                        | <i>SIAH2</i>    | 6478   |
| 219734_at    | SID1 transmembrane family, member 1                                                      | <i>SIDT1</i>    | 54847  |
| 44673_at     | sialic acid binding Ig-like lectin 1, sialoadhesin                                       | <i>SIGLEC1</i>  | 6614   |
| 215856_at    | sialic acid binding Ig-like lectin 15                                                    | <i>SIGLEC15</i> | 284266 |
| 210796_x_at  | sialic acid binding Ig-like lectin 6                                                     | <i>SIGLEC6</i>  | 946    |
| 207224_s_at  | sialic acid binding Ig-like lectin 7                                                     | <i>SIGLEC7</i>  | 27036  |
| 216537_s_at  | sialic acid binding Ig-like lectin 7                                                     | <i>SIGLEC7</i>  | 27036  |
| 232686_at    | sialic acid binding Ig-like lectin, pseudogene 3                                         | <i>SIGLECP3</i> | 284367 |
| 221705_s_at  | suppressor of IKK epsilon                                                                | <i>SIKE</i>     | 80143  |
| 206876_at    | single-minded homolog 1 ( <i>Drosophila</i> )                                            | <i>SIM1</i>     | 6492   |
| 225135_at    | SIN3 homolog A, transcription regulator (yeast)                                          | <i>SIN3A</i>    | 25942  |
| 39705_at     | SIN3 homolog B, transcription regulator (yeast)                                          | <i>SIN3B</i>    | 23309  |
| 211114_x_at  | survival of motor neuron protein interacting protein 1                                   | <i>SIP1</i>     | 8487   |
| 211115_x_at  | survival of motor neuron protein interacting protein 1                                   | <i>SIP1</i>     | 8487   |
| 210779_x_at  | survival of motor neuron protein interacting protein 1                                   | <i>SIP1</i>     | 8487   |
| 202255_s_at  | signal-induced proliferation-associated 1 like 1                                         | <i>SIPA1L1</i>  | 26037  |
| 233587_s_at  | signal-induced proliferation-associated 1 like 2                                         | <i>SIPA1L2</i>  | 57568  |
| 225056_at    | signal-induced proliferation-associated 1 like 2                                         | <i>SIPA1L2</i>  | 57568  |
| 1559469_s_at | signal-induced proliferation-associated 1 like 2                                         | <i>SIPA1L2</i>  | 57568  |
| 206934_at    | signal-regulatory protein beta 1                                                         | <i>SIRPB1</i>   | 10326  |
| 1554624_a_at | signal-regulatory protein beta 1                                                         | <i>SIRPB1</i>   | 10326  |
| 49327_at     | sirtuin (silent mating type information regulation 2 homolog) 3 ( <i>S. cerevisiae</i> ) | <i>SIRT3</i>    | 23410  |
| 233179_x_at  | sirtuin (silent mating type information regulation 2 homolog) 6 ( <i>S. cerevisiae</i> ) | <i>SIRT6</i>    | 51548  |

|              |                                                                                     |                 |             |
|--------------|-------------------------------------------------------------------------------------|-----------------|-------------|
| 203489_at    | SIVA1, apoptosis-inducing factor                                                    | <i>SIVA1</i>    | 10572       |
| 206675_s_at  | SKI-like oncogene                                                                   | <i>SKIL</i>     | 6498        |
| 203727_at    | superkiller viralicidic activity 2-like ( <i>S. cerevisiae</i> )                    | <i>SKIV2L</i>   | 6499        |
| 200718_s_at  | S-phase kinase-associated protein 1A (p19A)                                         | <i>SKP1A</i>    | 6500        |
| 207974_s_at  | S-phase kinase-associated protein 1A (p19A)                                         | <i>SKP1A</i>    | 6500        |
| 203625_x_at  | S-phase kinase-associated protein 2 (p45)                                           | <i>SKP2</i>     | 6502        |
| 203761_at    | Src-like-adaptor                                                                    | <i>SLA</i>      | 6503        |
| 225619_at    | SLAIN motif family, member 1                                                        | <i>SLAIN1</i>   | 122060      |
| 224853_at    | SLAIN motif family, member 2                                                        | <i>SLAIN2</i>   | 57606       |
| 224845_s_at  | SLAIN motif family, member 2                                                        | <i>SLAIN2</i>   | 57606       |
| 206181_at    | signaling lymphocytic activation molecule family member 1                           | <i>SLAMF1</i>   | 6504        |
| 1552497_a_at | SLAM family member 6                                                                | <i>SLAMF6</i>   | 114836      |
| 235143_at    | solute carrier family 10 (sodium/bile acid cotransporter family), member 7          | <i>SLC10A7</i>  | 84068       |
| 210422_x_at  | solute carrier family 11 (proton-coupled divalent metal ion transporters), memb     | <i>SLC11A1</i>  | 6556        |
| 217507_at    | solute carrier family 11 (proton-coupled divalent metal ion transporters), memb     | <i>SLC11A1</i>  | 6556        |
| 210423_s_at  | solute carrier family 11 (proton-coupled divalent metal ion transporters), memb     | <i>SLC11A1</i>  | 6556        |
| 1555116_s_at | solute carrier family 11 (proton-coupled divalent metal ion transporters), memb     | <i>SLC11A1</i>  | 6556        |
| 203123_s_at  | solute carrier family 11 (proton-coupled divalent metal ion transporters), memb     | <i>SLC11A2</i>  | 4891        |
| 203124_s_at  | solute carrier family 11 (proton-coupled divalent metal ion transporters), memb     | <i>SLC11A2</i>  | 4891        |
| 203125_x_at  | solute carrier family 11 (proton-coupled divalent metal ion transporters), memb     | <i>SLC11A2</i>  | 4891        |
| 204404_at    | solute carrier family 12 (sodium/potassium/chloride transporters), member 2         | <i>SLC12A2</i>  | 6558        |
| 225835_at    | solute carrier family 12 (sodium/potassium/chloride transporters), member 2         | <i>SLC12A2</i>  | 6558        |
| 210040_at    | solute carrier family 12, (potassium-chloride transporter) member 5                 | <i>SLC12A5</i>  | 57468       |
| 220740_s_at  | solute carrier family 12 (potassium/chloride transporters), member 6                | <i>SLC12A6</i>  | 9990        |
| 223596_at    | solute carrier family 12 (potassium/chloride transporters), member 6                | <i>SLC12A6</i>  | 9990        |
| 220371_s_at  | solute carrier family 12 (potassium/chloride transporters), member 9                | <i>SLC12A9</i>  | 56996       |
| 220502_s_at  | solute carrier family 13 (sodium/sulfate symporters), member 1                      | <i>SLC13A1</i>  | 6561        |
| 240159_at    | solute carrier family 15 (H+/peptide transporter), member 2                         | <i>SLC15A2</i>  | 6565        |
| 205317_s_at  | solute carrier family 15 (H+/peptide transporter), member 2                         | <i>SLC15A2</i>  | 6565        |
| 219593_at    | solute carrier family 15, member 3                                                  | <i>SLC15A3</i>  | 51296       |
| 225057_at    | solute carrier family 15, member 4                                                  | <i>SLC15A4</i>  | 121260      |
| 225043_at    | solute carrier family 15, member 4                                                  | <i>SLC15A4</i>  | 121260      |
| 238029_s_at  | solute carrier family 16, member 14 (monocarboxylic acid transporter 14)            | <i>SLC16A14</i> | 151473      |
| 202855_s_at  | solute carrier family 16, member 3 (monocarboxylic acid transporter 4)              | <i>SLC16A3</i>  | 9123        |
| 202856_s_at  | solute carrier family 16, member 3 (monocarboxylic acid transporter 4)              | <i>SLC16A3</i>  | 9123        |
| 206600_s_at  | solute carrier family 16, member 5 (monocarboxylic acid transporter 6)              | <i>SLC16A5</i>  | 100133772 , |
| 206599_at    | solute carrier family 16, member 5 (monocarboxylic acid transporter 6)              | <i>SLC16A5</i>  | 100133772 , |
| 207038_at    | solute carrier family 16, member 6 (monocarboxylic acid transporter 7)              | <i>SLC16A6</i>  | 9120        |
| 230748_at    | solute carrier family 16, member 6 (monocarboxylic acid transporter 7)              | <i>SLC16A6</i>  | 9120        |
| 207057_at    | solute carrier family 16, member 7 (monocarboxylic acid transporter 2)              | <i>SLC16A7</i>  | 9194        |
| 241866_at    | solute carrier family 16, member 7 (monocarboxylic acid transporter 2)              | <i>SLC16A7</i>  | 9194        |
| 210807_s_at  | solute carrier family 16, member 7 (monocarboxylic acid transporter 2)              | <i>SLC16A7</i>  | 9194        |
| 207097_s_at  | solute carrier family 17 (sodium phosphate), member 2                               | <i>SLC17A2</i>  | 10246       |
| 223441_at    | solute carrier family 17 (anion/sugar transporter), member 5                        | <i>SLC17A5</i>  | 26503       |
| 220551_at    | solute carrier family 17 (sodium-dependent inorganic phosphate cotransporter)       | <i>SLC17A6</i>  | 57084       |
| 204230_s_at  | solute carrier family 17 (sodium-dependent inorganic phosphate cotransporter)       | <i>SLC17A7</i>  | 57030       |
| 1553415_at   | solute carrier family 17 (sodium-dependent inorganic phosphate cotransporter)       | <i>SLC17A8</i>  | 246213      |
| 209681_at    | solute carrier family 19 (thiamine transporter), member 2                           | <i>SLC19A2</i>  | 10560       |
| 213664_at    | solute carrier family 1 (neuronal/epithelial high affinity glutamate transporter, s | <i>SLC1A1</i>   | 6505        |
| 212811_x_at  | solute carrier family 1 (glutamate/neutral amino acid transporter), member 4        | <i>SLC1A4</i>   | 6509        |
| 209610_s_at  | solute carrier family 1 (glutamate/neutral amino acid transporter), member 4        | <i>SLC1A4</i>   | 6509        |
| 207408_at    | solute carrier family 22 (organic cation transporter), member 14                    | <i>SLC22A14</i> | 9389        |
| 204981_at    | solute carrier family 22 (organic cation transporter), member 18                    | <i>SLC22A18</i> | 5002        |
| 242578_x_at  | Solute carrier family 22 (extraneuronal monoamine transporter), member 3            | <i>SLC22A3</i>  | 6581        |
| 209236_at    | solute carrier family 23 (nucleobase transporters), member 2                        | <i>SLC23A2</i>  | 9962        |
| 211572_s_at  | solute carrier family 23 (nucleobase transporters), member 2                        | <i>SLC23A2</i>  | 9962        |
| 230949_at    | solute carrier family 23 (nucleobase transporters), member 3                        | <i>SLC23A3</i>  | 151295      |
| 219090_at    | solute carrier family 24 (sodium/potassium/calcium exchanger), member 3             | <i>SLC24A3</i>  | 57419       |
| 218749_s_at  | solute carrier family 24 (sodium/potassium/calcium exchanger), member 6             | <i>SLC24A6</i>  | 80024       |
| 210010_s_at  | solute carrier family 25 (mitochondrial carrier; citrate transporter), member 1     | <i>SLC25A1</i>  | 6576        |
| 203775_at    | solute carrier family 25, member 13 (citrin)                                        | <i>SLC25A13</i> | 10165       |
| 229061_s_at  | solute carrier family 25, member 13 (citrin)                                        | <i>SLC25A13</i> | 10165       |
| 204587_at    | solute carrier family 25 (mitochondrial carrier, brain), member 14                  | <i>SLC25A14</i> | 9016        |

|              |                                                                                                     |                 |           |
|--------------|-----------------------------------------------------------------------------------------------------|-----------------|-----------|
| 210686_x_at  | solute carrier family 25 (mitochondrial carrier; Graves disease autoantigen), member 1              | <i>SLC25A16</i> | 8034      |
| 203658_at    | solute carrier family 25 (carnitine/acylcarnitine translocase), member 20                           | <i>SLC25A20</i> | 788       |
| 204342_at    | solute carrier family 25 (mitochondrial carrier; phosphate carrier), member 24                      | <i>SLC25A24</i> | 29957     |
| 223192_at    | solute carrier family 25, member 28                                                                 | <i>SLC25A28</i> | 81894     |
| 225305_at    | solute carrier family 25, member 29                                                                 | <i>SLC25A29</i> | 123096    |
| 225306_s_at  | solute carrier family 25, member 29                                                                 | <i>SLC25A29</i> | 123096    |
| 232280_at    | Solute carrier family 25, member 29                                                                 | <i>SLC25A29</i> | 123096    |
| 223698_at    | solute carrier family 25, member 36                                                                 | <i>SLC25A36</i> | 55186     |
| 222529_at    | solute carrier family 25, member 37                                                                 | <i>SLC25A37</i> | 51312     |
| 222528_s_at  | solute carrier family 25, member 37                                                                 | <i>SLC25A37</i> | 51312     |
| 218978_s_at  | solute carrier family 25, member 37                                                                 | <i>SLC25A37</i> | 51312     |
| 205716_at    | solute carrier family 25, member 40                                                                 | <i>SLC25A40</i> | 55972     |
| 212683_at    | solute carrier family 25, member 44                                                                 | <i>SLC25A44</i> | 9673      |
| 212085_at    | solute carrier family 25 (mitochondrial carrier; adenine nucleotide translocator), member 6         | <i>SLC25A6</i>  | 293       |
| 226679_at    | solute carrier family 26, member 11                                                                 | <i>SLC26A11</i> | 284129    |
| 224959_at    | solute carrier family 26 (sulfate transporter), member 2                                            | <i>SLC26A2</i>  | 1836      |
| 215657_at    | Solute carrier family 26, member 3                                                                  | <i>SLC26A3</i>  | 1811      |
| 239006_at    | solute carrier family 26, member 7                                                                  | <i>SLC26A7</i>  | 115111    |
| 219932_at    | solute carrier family 27 (fatty acid transporter), member 6                                         | <i>SLC27A6</i>  | 28965     |
| 201250_s_at  | solute carrier family 2 (facilitated glucose transporter), member 1                                 | <i>SLC2A1</i>   | 6513      |
| 1552695_a_at | solute carrier family 2 (facilitated glucose transporter), member 13                                | <i>SLC2A13</i>  | 114134    |
| 216236_s_at  | solute carrier family 2 (facilitated glucose transporter), member 3                                 | <i>SLC2A14</i>  | 144195    |
| 222088_s_at  | solute carrier family 2 (facilitated glucose transporter), member 3                                 | <i>SLC2A14</i>  | 144195    |
| 202497_x_at  | solute carrier family 2 (facilitated glucose transporter), member 3                                 | <i>SLC2A3</i>   | 6515      |
| 202499_s_at  | solute carrier family 2 (facilitated glucose transporter), member 3                                 | <i>SLC2A3</i>   | 6515      |
| 202498_s_at  | solute carrier family 2 (facilitated glucose transporter), member 3                                 | <i>SLC2A3</i>   | 6515      |
| 221751_at    | Solute carrier family 2 (facilitated glucose transporter), member 3 pseudogene 1                    | <i>SLC2A3P1</i> | 100128062 |
| 218494_s_at  | SLC2A4 regulator                                                                                    | <i>SLC2A4RG</i> | 56731     |
| 204429_s_at  | solute carrier family 2 (facilitated glucose/fructose transporter), member 5                        | <i>SLC2A5</i>   | 6518      |
| 212907_at    | solute carrier family 30 (zinc transporter), member 1                                               | <i>SLC30A1</i>  | 7779      |
| 228181_at    | solute carrier family 30 (zinc transporter), member 1                                               | <i>SLC30A1</i>  | 7779      |
| 239596_at    | solute carrier family 30 (zinc transporter), member 7                                               | <i>SLC30A7</i>  | 148867    |
| 239983_at    | solute carrier family 30 (zinc transporter), member 8                                               | <i>SLC30A8</i>  | 169026    |
| 235013_at    | solute carrier family 31 (copper transporters), member 1                                            | <i>SLC31A1</i>  | 1317      |
| 203971_at    | solute carrier family 31 (copper transporters), member 1                                            | <i>SLC31A1</i>  | 1317      |
| 204204_at    | solute carrier family 31 (copper transporters), member 2                                            | <i>SLC31A2</i>  | 1318      |
| 209865_at    | solute carrier family 35 (UDP-N-acetylglucosamine (UDP-GlcNAc) transporter), member 3               | <i>SLC35A3</i>  | 23443     |
| 218519_at    | solute carrier family 35, member A5                                                                 | <i>SLC35A5</i>  | 55032     |
| 202433_at    | solute carrier family 35, member B1                                                                 | <i>SLC35B1</i>  | 10237     |
| 224716_at    | solute carrier family 35, member B2                                                                 | <i>SLC35B2</i>  | 347734    |
| 225037_at    | solute carrier family 35, member C2                                                                 | <i>SLC35C2</i>  | 51006     |
| 209711_at    | solute carrier family 35 (UDP-glucuronic acid/UDP-N-acetylgalactosamine dual transporter), member 1 | <i>SLC35D1</i>  | 23169     |
| 209712_at    | solute carrier family 35 (UDP-glucuronic acid/UDP-N-acetylgalactosamine dual transporter), member 2 | <i>SLC35D1</i>  | 23169     |
| 231437_at    | solute carrier family 35, member D2                                                                 | <i>SLC35D2</i>  | 11046     |
| 227518_at    | solute carrier family 35, member E1                                                                 | <i>SLC35E1</i>  | 79939     |
| 235035_at    | solute carrier family 35, member E1                                                                 | <i>SLC35E1</i>  | 79939     |
| 222263_at    | solute carrier family 35, member E1                                                                 | <i>SLC35E1</i>  | 79939     |
| 215169_at    | solute carrier family 35, member E2                                                                 | <i>SLC35E2</i>  | 728661    |
| 218988_at    | solute carrier family 35, member E3                                                                 | <i>SLC35E3</i>  | 55508     |
| 228060_at    | solute carrier family 35, member F1                                                                 | <i>SLC35F1</i>  | 222553    |
| 220123_at    | solute carrier family 35, member F5                                                                 | <i>SLC35F5</i>  | 80255     |
| 234978_at    | solute carrier family 36 (proton/amino acid symporter), member 4                                    | <i>SLC36A4</i>  | 120103    |
| 218928_s_at  | solute carrier family 37 (glycerol-3-phosphate transporter), member 1                               | <i>SLC37A1</i>  | 54020     |
| 223304_at    | solute carrier family 37 (glycerol-3-phosphate transporter), member 3                               | <i>SLC37A3</i>  | 84255     |
| 224579_at    | solute carrier family 38, member 1                                                                  | <i>SLC38A1</i>  | 81539     |
| 218237_s_at  | solute carrier family 38, member 1                                                                  | <i>SLC38A1</i>  | 81539     |
| 220786_s_at  | solute carrier family 38, member 4                                                                  | <i>SLC38A4</i>  | 55089     |
| 214830_at    | solute carrier family 38, member 6                                                                  | <i>SLC38A6</i>  | 145389    |
| 225295_at    | solute carrier family 39 (zinc transporter), member 10                                              | <i>SLC39A10</i> | 57181     |
| 227046_at    | solute carrier family 39 (metal ion transporter), member 11                                         | <i>SLC39A11</i> | 201266    |
| 202088_at    | solute carrier family 39 (zinc transporter), member 6                                               | <i>SLC39A6</i>  | 25800     |
| 1555460_a_at | solute carrier family 39 (zinc transporter), member 6                                               | <i>SLC39A6</i>  | 25800     |
| 202667_s_at  | solute carrier family 39 (zinc transporter), member 7                                               | <i>SLC39A7</i>  | 7922      |

|              |                                                                                     |          |              |
|--------------|-------------------------------------------------------------------------------------|----------|--------------|
| 216504_s_at  | solute carrier family 39 (zinc transporter), member 8                               | SLC39A8  | 64116        |
| 216009_at    | solute carrier family 39 (zinc transporter), member 9                               | SLC39A9  | 55334        |
| 205799_s_at  | solute carrier family 3 (cystine, dibasic and neutral amino acid transporters, acti | SLC3A1   | 6519         |
| 200924_s_at  | solute carrier family 3 (activators of dibasic and neutral amino acid transport), n | SLC3A2   | 442497 /// t |
| 223044_at    | solute carrier family 40 (iron-regulated transporter), member 1                     | SLC40A1  | 30061        |
| 233123_at    | Solute carrier family 40 (iron-regulated transporter), member 1                     | SLC40A1  | 30061        |
| 210692_s_at  | solute carrier family 43, member 3                                                  | SLC43A3  | 29015        |
| 213113_s_at  | solute carrier family 43, member 3                                                  | SLC43A3  | 29015        |
| 224595_at    | solute carrier family 44, member 1                                                  | SLC44A1  | 23446        |
| 224596_at    | solute carrier family 44, member 1                                                  | SLC44A1  | 23446        |
| 228485_s_at  | solute carrier family 44, member 1                                                  | SLC44A1  | 23446        |
| 225175_s_at  | solute carrier family 44, member 2                                                  | SLC44A2  | 57153        |
| 224609_at    | solute carrier family 44, member 2                                                  | SLC44A2  | 57153        |
| 235763_at    | solute carrier family 44, member 5                                                  | SLC44A5  | 204962       |
| 225597_at    | solute carrier family 45, member 4                                                  | SLC45A4  | 57210        |
| 1558201_s_at | solute carrier family 4 (anion exchanger), member 1, adaptor protein                | SLC4A1AP | 22950        |
| 218682_s_at  | solute carrier family 4 (anion exchanger), member 1, adaptor protein                | SLC4A1AP | 22950        |
| 202111_at    | solute carrier family 4, anion exchanger, member 2 (erythrocyte membrane pro        | SLC4A2   | 6522         |
| 210739_x_at  | solute carrier family 4, sodium bicarbonate cotransporter, member 4                 | SLC4A4   | 8671         |
| 1554027_a_at | solute carrier family 4, sodium bicarbonate cotransporter, member 4                 | SLC4A4   | 8671         |
| 211494_s_at  | solute carrier family 4, sodium bicarbonate cotransporter, member 4                 | SLC4A4   | 8671         |
| 203908_at    | solute carrier family 4, sodium bicarbonate cotransporter, member 4                 | SLC4A4   | 8671         |
| 221723_s_at  | solute carrier family 4, sodium bicarbonate cotransporter, member 5                 | SLC4A5   | 57835        |
| 209884_s_at  | solute carrier family 4, sodium bicarbonate cotransporter, member 7                 | SLC4A7   | 9497         |
| 210286_s_at  | solute carrier family 4, sodium bicarbonate cotransporter, member 7                 | SLC4A7   | 9497         |
| 207056_s_at  | solute carrier family 4, sodium bicarbonate cotransporter, member 8                 | SLC4A8   | 9498         |
| 213167_s_at  | solute carrier family 5 (inositol transporters), member 3                           | SLC5A3   | 6526         |
| 212944_at    | solute carrier family 5 (inositol transporters), member 3                           | SLC5A3   | 6526         |
| 232378_at    | solute carrier family 5 (sodium/glucose cotransporter), member 9                    | SLC5A9   | 200010       |
| 239352_at    | solute carrier family 6, member 15                                                  | SLC6A15  | 55117        |
| 1569940_at   | Solute carrier family 6, member 16                                                  | SLC6A16  | 28968        |
| 205921_s_at  | solute carrier family 6 (neurotransmitter transporter, taurine), member 6           | SLC6A6   | 6533         |
| 228754_at    | solute carrier family 6 (neurotransmitter transporter, taurine), member 6           | SLC6A6   | 6533         |
| 205920_at    | solute carrier family 6 (neurotransmitter transporter, taurine), member 6           | SLC6A6   | 6533         |
| 211030_s_at  | solute carrier family 6 (neurotransmitter transporter, taurine), member 6           | SLC6A6   | 6533         |
| 212295_s_at  | solute carrier family 7 (cationic amino acid transporter, y+ system), member 1      | SLC7A1   | 6541         |
| 217678_at    | solute carrier family 7, (cationic amino acid transporter, y+ system) member 11     | SLC7A11  | 23657        |
| 209921_at    | solute carrier family 7, (cationic amino acid transporter, y+ system) member 11     | SLC7A11  | 23657        |
| 207528_s_at  | solute carrier family 7, (cationic amino acid transporter, y+ system) member 11     | SLC7A11  | 23657        |
| 201195_s_at  | solute carrier family 7 (cationic amino acid transporter, y+ system), member 5      | SLC7A5   | 8140         |
| 203579_s_at  | solute carrier family 7 (cationic amino acid transporter, y+ system), member 6      | SLC7A6   | 9057         |
| 203580_s_at  | solute carrier family 7 (cationic amino acid transporter, y+ system), member 6      | SLC7A6   | 9057         |
| 229153_at    | solute carrier family 7, member 6 opposite strand                                   | SLC7A6OS | 84138        |
| 204588_s_at  | solute carrier family 7 (cationic amino acid transporter, y+ system), member 7      | SLC7A7   | 9056         |
| 216092_s_at  | solute carrier family 7 (cationic amino acid transporter, y+ system), member 8      | SLC7A8   | 23428        |
| 1565306_a_at | solute carrier family 8 (sodium/calcium exchanger), member 1                        | SLC8A1   | 6546         |
| 235518_at    | solute carrier family 8 (sodium/calcium exchanger), member 1                        | SLC8A1   | 6546         |
| 207308_at    | solute carrier organic anion transporter family, member 1A2                         | SLCO1A2  | 6579         |
| 210366_at    | solute carrier organic anion transporter family, member 1B1                         | SLCO1B1  | 10599 /// 2f |
| 219911_s_at  | solute carrier organic anion transporter family, member 4A1                         | SLCO4A1  | 100134295 ,  |
| 222071_s_at  | solute carrier organic anion transporter family, member 4C1                         | SLCO4C1  | 353189       |
| 219885_at    | schlafen family member 12                                                           | SLFN12   | 55106        |
| 1558217_at   | schlafen family member 13                                                           | SLFN13   | 146857       |
| 226725_at    | Schlafen family member 5                                                            | SLFN5    | ---          |
| 238430_x_at  | schlafen family member 5                                                            | SLFN5    | 162394       |
| 229045_at    | selectin ligand interactor cytoplasmic-1                                            | SLIC1    | 124460       |
| 1563641_a_at | selectin ligand interactor cytoplasmic-1                                            | SLIC1    | 124460       |
| 235976_at    | SLIT and NTRK-like family, member 6                                                 | SLITRK6  | 84189        |
| 232481_s_at  | SLIT and NTRK-like family, member 6                                                 | SLITRK6  | 84189        |
| 232176_at    | SLIT and NTRK-like family, member 6                                                 | SLITRK6  | 84189        |
| 222924_at    | sarcolemma associated protein                                                       | SLMAP    | 7871         |
| 225243_s_at  | sarcolemma associated protein                                                       | SLMAP    | 7871         |
| 203021_at    | secretory leukocyte peptidase inhibitor                                             | SLPI     | 6590         |

|              |                                                                                |                               |              |
|--------------|--------------------------------------------------------------------------------|-------------------------------|--------------|
| 227990_at    | SLU7 splicing factor homolog ( <i>S. cerevisiae</i> )                          | <i>SLU7</i>                   | 10569        |
| 231718_at    | SLU7 splicing factor homolog ( <i>S. cerevisiae</i> )                          | <i>SLU7</i>                   | 10569        |
| 214850_at    | Glucuronidase, beta pseudogene                                                 | <i>SMA4</i>                   | 11039        |
| 206565_x_at  | glucuronidase, beta pseudogene                                                 | <i>SMA4</i>                   | 11039        |
| 238446_at    | Glucuronidase, beta pseudogene                                                 | <i>SMA4</i>                   | 11039        |
| 215043_s_at  | glucuronidase, beta pseudogene                                                 | <i>SMA4</i> /// <i>SMA5</i>   | 11039 /// 1: |
| 226563_at    | SMAD family member 2                                                           | <i>SMAD2</i>                  | 4087         |
| 203076_s_at  | SMAD family member 2                                                           | <i>SMAD2</i>                  | 4087         |
| 205397_x_at  | SMAD family member 3                                                           | <i>SMAD3</i>                  | 4088         |
| 205398_s_at  | SMAD family member 3                                                           | <i>SMAD3</i>                  | 4088         |
| 205396_at    | SMAD family member 3                                                           | <i>SMAD3</i>                  | 4088         |
| 1565702_at   | SMAD family member 4                                                           | <i>SMAD4</i>                  | 4089         |
| 235451_at    | SMAD family member 5                                                           | <i>SMAD5</i>                  | 4090         |
| 218137_s_at  | stromal membrane-associated protein 1                                          | <i>SMAP1</i>                  | 60682        |
| 225282_at    | stromal membrane-associated protein 1-like                                     | <i>SMAP1L</i>                 | 64744        |
| 212520_s_at  | SWI/SNF related, matrix associated, actin dependent regulator of chromatin, su | <i>SMARCA4</i>                | 6597         |
| 202303_x_at  | SWI/SNF related, matrix associated, actin dependent regulator of chromatin, su | <i>SMARCA5</i>                | 8467         |
| 212167_s_at  | SWI/SNF related, matrix associated, actin dependent regulator of chromatin, su | <i>SMARCB1</i>                | 6598         |
| 201074_at    | SWI/SNF related, matrix associated, actin dependent regulator of chromatin, su | <i>SMARCC1</i>                | 6599         |
| 203183_s_at  | SWI/SNF related, matrix associated, actin dependent regulator of chromatin, su | <i>SMARCD1</i>                | 6602         |
| 211988_at    | SWI/SNF related, matrix associated, actin dependent regulator of chromatin, su | <i>SMARCE1</i>                | 6605         |
| 213253_at    | structural maintenance of chromosomes 2                                        | <i>SMC2</i>                   | 10592        |
| 218781_at    | structural maintenance of chromosomes 6                                        | <i>SMC6</i>                   | 79677        |
| 212577_at    | structural maintenance of chromosomes flexible hinge domain containing 1       | <i>SMCHD1</i>                 | 23347        |
| 241620_at    | structural maintenance of chromosomes flexible hinge domain containing 1       | <i>SMCHD1</i>                 | 23347        |
| 221516_s_at  | Smith-Magenis syndrome chromosome region, candidate 7-like                     | <i>SMCR7L</i>                 | 54471        |
| 204593_s_at  | Smith-Magenis syndrome chromosome region, candidate 7-like                     | <i>SMCR7L</i>                 | 54471        |
| 224319_s_at  | Smith-Magenis syndrome chromosome region, candidate 7-like                     | <i>SMCR7L</i>                 | 54471        |
| 227305_s_at  | Smith-Magenis syndrome chromosome region, candidate 8                          | <i>SMCR8</i>                  | 140775       |
| 227304_at    | Smith-Magenis syndrome chromosome region, candidate 8                          | <i>SMCR8</i>                  | 140775       |
| 222270_at    | SMEK homolog 2, suppressor of mek1 ( <i>Dictyostelium</i> )                    | <i>SMEK2</i>                  | 57223        |
| 233759_s_at  | SMEK homolog 2, suppressor of mek1 ( <i>Dictyostelium</i> )                    | <i>SMEK2</i>                  | 57223        |
| 210057_at    | PI-3-kinase-related kinase SMG-1                                               | <i>SMG1</i>                   | 23049        |
| 224842_at    | PI-3-kinase-related kinase SMG-1                                               | <i>SMG1</i>                   | 23049        |
| 200071_at    | survival motor neuron domain containing 1                                      | <i>SMNDC1</i>                 | 10285        |
| 205622_at    | sphingomyelin phosphodiesterase 2, neutral membrane (neutral sphingomyelin     | <i>SMPD2</i>                  | 6610         |
| 212921_at    | SET and MYND domain containing 2                                               | <i>SMYD2</i>                  | 56950        |
| 213139_at    | snail homolog 2 ( <i>Drosophila</i> )                                          | <i>SNAI2</i>                  | 6591         |
| 214544_s_at  | synaptosomal-associated protein, 23kDa                                         | <i>SNAP23</i>                 | 8773         |
| 218327_s_at  | synaptosomal-associated protein, 29kDa                                         | <i>SNAP29</i>                 | 9342         |
| 222597_at    | synaptosomal-associated protein, 29kDa                                         | <i>SNAP29</i>                 | 9342         |
| 205443_at    | small nuclear RNA activating complex, polypeptide 1, 43kDa                     | <i>SNAPC1</i>                 | 6617         |
| 1554093_a_at | small nuclear RNA activating complex, polypeptide 5, 19kDa                     | <i>SNAPC5</i>                 | 10302        |
| 208078_s_at  | SNF1-like kinase                                                               | <i>SNF1LK</i>                 | 150094       |
| 1564906_at   | small nucleolar RNA host gene (non-protein coding) 4                           | <i>SNHG4</i>                  | 724102       |
| 218033_s_at  | stannin                                                                        | <i>SNN</i>                    | 8303         |
| 218032_at    | stannin                                                                        | <i>SNN</i>                    | 8303         |
| 1566402_at   | small nucleolar RNA, H/ACA box 68                                              | <i>SNORA68</i>                | 26780        |
| 209481_at    | SNF related kinase                                                             | <i>SNRK</i>                   | 54861        |
| 242146_at    | Small nuclear ribonucleoprotein polypeptide A'                                 | <i>SNRPA1</i>                 | 6627         |
| 202691_at    | small nuclear ribonucleoprotein D1 polypeptide 16kDa                           | <i>SNRPD1</i>                 | 6632         |
| 202690_s_at  | small nuclear ribonucleoprotein D1 polypeptide 16kDa                           | <i>SNRPD1</i>                 | 6632         |
| 203316_s_at  | small nuclear ribonucleoprotein polypeptide E                                  | <i>SNRPE</i>                  | 6635         |
| 203832_at    | small nuclear ribonucleoprotein polypeptide F                                  | <i>SNRPF</i>                  | 6636         |
| 1559545_at   | Small nuclear ribonucleoprotein polypeptide N                                  | <i>SNRPN</i>                  | 6638         |
| 228370_at    | Small nuclear ribonucleoprotein polypeptide N                                  | <i>SNRPN</i>                  | 6638         |
| 1559343_at   | Small nuclear ribonucleoprotein polypeptide N                                  | <i>SNRPN</i>                  | 6638         |
| 201522_x_at  | small nuclear ribonucleoprotein polypeptide N /// SNRPN upstream reading frar  | <i>SNRPN</i> /// <i>SNURF</i> | 6638 /// 89: |
| 227312_at    | syntrophin, beta 2 (dystrophin-associated protein A1, 59kDa, basic component   | <i>SNTB2</i>                  | 6645         |
| 205315_s_at  | syntrophin, beta 2 (dystrophin-associated protein A1, 59kDa, basic component   | <i>SNTB2</i>                  | 6645         |
| 226685_at    | syntrophin, beta 2 (dystrophin-associated protein A1, 59kDa, basic component   | <i>SNTB2</i>                  | 6645         |
| 220405_at    | syntrophin, gamma 1                                                            | <i>SNTG1</i>                  | 100127998,   |
| 234919_s_at  | syntrophin, gamma 1                                                            | <i>SNTG1</i>                  | 54212        |

|              |                                                                           |                                 |        |
|--------------|---------------------------------------------------------------------------|---------------------------------|--------|
| 201575_at    | SNW domain containing 1                                                   | SNW1                            | 22938  |
| 215424_s_at  | SNW domain containing 1                                                   | SNW1                            | 22938  |
| 201716_at    | sorting nexin 1                                                           | SNX1                            | 6642   |
| 220140_s_at  | sorting nexin 11                                                          | SNX11                           | 29916  |
| 225101_s_at  | sorting nexin 14                                                          | SNX14                           | 57231  |
| 200991_s_at  | sorting nexin 17                                                          | SNX17                           | 9784   |
| 230509_at    | sorting nexin 22                                                          | SNX22                           | 79856  |
| 221006_s_at  | sorting nexin family member 27                                            | SNX27                           | 81609  |
| 221498_at    | sorting nexin family member 27                                            | SNX27                           | 81609  |
| 213545_x_at  | sorting nexin 3                                                           | SNX3                            | 8724   |
| 200067_x_at  | sorting nexin 3                                                           | SNX3                            | 8724   |
| 208781_x_at  | sorting nexin 3                                                           | SNX3                            | 8724   |
| 210648_x_at  | sorting nexin 3                                                           | SNX3                            | 8724   |
| 212652_s_at  | sorting nexin 4                                                           | SNX4                            | 8723   |
| 205573_s_at  | sorting nexin 7                                                           | SNX7                            | 51375  |
| 223241_at    | sorting nexin 8                                                           | SNX8                            | 29886  |
| 228479_at    | sterol O-acyltransferase (acyl-Coenzyme A: cholesterol acyltransferase) 1 | SOAT1                           | ---    |
| 244661_at    | sterol O-acyltransferase (acyl-Coenzyme A: cholesterol acyltransferase) 1 | SOAT1                           | ---    |
| 221561_at    | sterol O-acyltransferase (acyl-Coenzyme A: cholesterol acyltransferase) 1 | SOAT1                           | 6646   |
| 218974_at    | sine oculis binding protein homolog (Drosophila)                          | SOBP                            | 55084  |
| 203373_at    | suppressor of cytokine signaling 2                                        | SOCS2                           | 8835   |
| 227697_at    | suppressor of cytokine signaling 3                                        | SOCS3                           | 9021   |
| 206359_at    | suppressor of cytokine signaling 3                                        | SOCS3                           | 9021   |
| 206360_s_at  | suppressor of cytokine signaling 3                                        | SOCS3                           | 9021   |
| 1552792_at   | suppressor of cytokine signaling 4                                        | SOCS4                           | 122809 |
| 209647_s_at  | suppressor of cytokine signaling 5                                        | SOCS5                           | 9655   |
| 208127_s_at  | suppressor of cytokine signaling 5                                        | SOCS5                           | 9655   |
| 200642_at    | superoxide dismutase 1, soluble (amyotrophic lateral sclerosis 1 (adult)) | SOD1                            | 6647   |
| 215223_s_at  | superoxide dismutase 2, mitochondrial                                     | SOD2                            | 6648   |
| 216841_s_at  | superoxide dismutase 2, mitochondrial                                     | SOD2                            | 6648   |
| 215078_at    | superoxide dismutase 2, mitochondrial                                     | SOD2                            | 6648   |
| 1570153_at   | spermatogenesis and oogenesis specific basic helix-loop-helix 2           | SOHLH2                          | 54937  |
| 220129_at    | spermatogenesis and oogenesis specific basic helix-loop-helix 2           | SOHLH2                          | 54937  |
| 201085_s_at  | SON DNA binding protein                                                   | SON                             | 6651   |
| 230707_at    | sortilin-related receptor, L(DLR class) A repeats-containing              | SORL1                           | 6653   |
| 212807_s_at  | sortilin 1                                                                | SORT1                           | 6272   |
| 224818_at    | sortilin 1                                                                | SORT1                           | 6272   |
| 1557354_at   | son of sevenless homolog 1 (Drosophila)                                   | SOS1                            | 6654   |
| 230337_at    | son of sevenless homolog 1 (Drosophila)                                   | SOS1                            | 6654   |
| 217576_x_at  | son of sevenless homolog 2 (Drosophila)                                   | SOS2                            | 6655   |
| 204432_at    | SRY (sex determining region Y)-box 12                                     | SOX12                           | 6666   |
| 207678_s_at  | SRY (sex determining region Y)-box 30                                     | SOX30                           | 11063  |
| 201416_at    | SRY (sex determining region Y)-box 4                                      | SOX4                            | 6659   |
| 201417_at    | SRY (sex determining region Y)-box 4                                      | SOX4                            | 6659   |
| 224760_at    | Sp1 transcription factor                                                  | SP1                             | 6667   |
| 1553685_s_at | Sp1 transcription factor                                                  | SP1                             | 6667   |
| 224754_at    | Sp1 transcription factor                                                  | SP1                             | 6667   |
| 210985_s_at  | SP100 nuclear antigen                                                     | SP100                           | 6672   |
| 210218_s_at  | SP100 nuclear antigen                                                     | SP100                           | 6672   |
| 208392_x_at  | SP110 nuclear body protein                                                | SP110                           | 3431   |
| 223980_s_at  | SP110 nuclear body protein                                                | SP110                           | 3431   |
| 208012_x_at  | SP110 nuclear body protein                                                | SP110                           | 3431   |
| 209761_s_at  | SP110 nuclear body protein                                                | SP110                           | 3431   |
| 209762_x_at  | SP110 nuclear body protein                                                | SP110                           | 3431   |
| 204367_at    | Sp2 transcription factor                                                  | SP2                             | 6668   |
| 229217_at    | Sp3 transcription factor                                                  | SP3                             | 6670   |
| 210117_at    | sperm associated antigen 1                                                | SPAG1                           | 6674   |
| 1553582_a_at | sperm associated antigen 11B /// sperm associated antigen 11A             | SPAG11A /// SPAG.10407 /// 6674 |        |
| 219109_at    | sperm associated antigen 16                                               | SPAG16                          | 79582  |
| 219888_at    | sperm associated antigen 4                                                | SPAG4                           | 6676   |
| 225339_at    | sperm associated antigen 9                                                | SPAG9                           | 9043   |
| 212470_at    | sperm associated antigen 9                                                | SPAG9                           | 9043   |
| 206748_s_at  | sperm associated antigen 9                                                | SPAG9                           | 9043   |



|              |                                                                                  |          |              |
|--------------|----------------------------------------------------------------------------------|----------|--------------|
| 216972_at    | sperm adhesion molecule 1 (PH-20 hyaluronidase, zona pellucida binding)          | SPAM1    | 6677         |
| 216989_at    | sperm adhesion molecule 1 (PH-20 hyaluronidase, zona pellucida binding)          | SPAM1    | 6677         |
| 208045_at    | surfactant protein A binding protein                                             | SPAR     | ---          |
| 225564_at    | spermatogenesis associated 13                                                    | SPATA13  | 221178       |
| 214965_at    | spermatogenesis associated 2-like                                                | SPATA2L  | 124044       |
| 222163_s_at  | spermatogenesis associated 5-like 1                                              | SPATA5L1 | 79029        |
| 217927_at    | signal peptidase complex subunit 1 homolog (S. cerevisiae)                       | SPCS1    | 28972        |
| 201240_s_at  | signal peptidase complex subunit 2 homolog (S. cerevisiae)                       | SPCS2    | 653566 /// 5 |
| 222753_s_at  | signal peptidase complex subunit 3 homolog (S. cerevisiae)                       | SPCS3    | 60559        |
| 214403_x_at  | SAM pointed domain containing ets transcription factor                           | SPDEF    | 25803        |
| 244461_at    | sperm antigen with calponin homology and coiled-coil domains 1                   | SPECC1   | 92521        |
| 212480_at    | SPECC1-like                                                                      | SPECC1L  | 23384        |
| 1556058_s_at | spen homolog, transcriptional regulator (Drosophila)                             | SPEN     | 23013        |
| 236600_at    | spastic paraplegia 20 (Troyer syndrome)                                          | SPG20    | 23111        |
| 212526_at    | spastic paraplegia 20 (Troyer syndrome)                                          | SPG20    | 23111        |
| 215383_x_at  | spastic paraplegia 21 (autosomal recessive, Mast syndrome)                       | SPG21    | 51324        |
| 217827_s_at  | spastic paraplegia 21 (autosomal recessive, Mast syndrome)                       | SPG21    | 51324        |
| 230885_at    | spastic paraplegia 7 (pure and complicated autosomal recessive)                  | SPG7     | 6687         |
| 206272_at    | S-phase response (cyclin-related)                                                | SPHAR    | 10638 /// 58 |
| 219257_s_at  | sphingosine kinase 1                                                             | SPHK1    | 8877         |
| 217813_s_at  | spindlin 1                                                                       | SPIN1    | 10927        |
| 222431_at    | spindlin 1                                                                       | SPIN1    | 10927        |
| 1555883_s_at | spindlin family, member 3                                                        | SPIN3    | 169981       |
| 206318_at    | serine peptidase inhibitor-like, with Kunitz and WAP domains 1 (eppin)           | SPINLW1  | 57119        |
| 210715_s_at  | serine peptidase inhibitor, Kunitz type, 2                                       | SPINT2   | 10653        |
| 1568964_x_at | sialophorin (leukosialin, CD43)                                                  | SPN      | 6693         |
| 235900_at    | spinster homolog 3 (Drosophila)                                                  | SPNS3    | 201305       |
| 202524_s_at  | sparc/osteonectin, cwcv and kazal-like domains proteoglycan (testican) 2         | SPOCK2   | 9806         |
| 206433_s_at  | sparc/osteonectin, cwcv and kazal-like domains proteoglycan (testican) 3         | SPOCK3   | 50859        |
| 1554418_s_at | sparc/osteonectin, cwcv and kazal-like domains proteoglycan (testican) 3         | SPOCK3   | 50859        |
| 235342_at    | sparc/osteonectin, cwcv and kazal-like domains proteoglycan (testican) 3         | SPOCK3   | 50859        |
| 206434_at    | sparc/osteonectin, cwcv and kazal-like domains proteoglycan (testican) 3         | SPOCK3   | 50859        |
| 208927_at    | speckle-type POZ protein                                                         | SPOP     | 8405         |
| 209875_s_at  | secreted phosphoprotein 1 (osteopontin, bone sialoprotein I, early T-lymphocyte) | SPP1     | 6696         |
| 226353_at    | signal peptide peptidase-like 2A                                                 | SPPL2A   | 84888        |
| 226837_at    | sprouty-related, EVH1 domain containing 1                                        | SPRED1   | 161742       |
| 235074_at    | Sprouty-related, EVH1 domain containing 1                                        | SPRED1   | 161742       |
| 1552620_at   | small proline-rich protein 4                                                     | SPRR4    | 163778       |
| 204011_at    | sprouty homolog 2 (Drosophila)                                                   | SPRY2    | 10253        |
| 225616_at    | SPRY domain containing 4                                                         | SPRYD4   | 283377       |
| 221769_at    | splA/ryanodine receptor domain and SOCS box containing 3                         | SPSB3    | 90864        |
| 212071_s_at  | spectrin, beta, non-erythrocytic 1                                               | SPTBN1   | 6711         |
| 202277_at    | serine palmitoyltransferase, long chain base subunit 1                           | SPTLC1   | 10558        |
| 202278_s_at  | serine palmitoyltransferase, long chain base subunit 1                           | SPTLC1   | 10558        |
| 1554053_at   | serine palmitoyltransferase, long chain base subunit 1                           | SPTLC1   | 10558        |
| 216202_s_at  | serine palmitoyltransferase, long chain base subunit 2                           | SPTLC2   | 9517         |
| 220456_at    | serine palmitoyltransferase, long chain base subunit 3                           | SPTLC3   | 55304        |
| 235440_at    | SPT2, Suppressor of Ty, domain containing 1 (S. cerevisiae)                      | SPTY2D1  | 144108       |
| 229594_at    | SPT2, Suppressor of Ty, domain containing 1 (S. cerevisiae)                      | SPTY2D1  | 144108       |
| 209218_at    | squalene epoxidase                                                               | SQLE     | 6713         |
| 1557352_at   | Squalene epoxidase                                                               | SQLE     | 6713         |
| 217995_at    | sulfide quinone reductase-like (yeast)                                           | SQRDL    | 58472        |
| 201471_s_at  | sequestosome 1                                                                   | SQSTM1   | 8878         |
| 213112_s_at  | sequestosome 1                                                                   | SQSTM1   | 8878         |
| 212061_at    | U2-associated SR140 protein                                                      | SR140    | 23350        |
| 236431_at    | U2-associated SR140 protein                                                      | SR140    | 23350        |
| 212060_at    | U2-associated SR140 protein                                                      | SR140    | 23350        |
| 224864_at    | steroid receptor RNA activator 1                                                 | SRA1     | 10011        |
| 224130_s_at  | steroid receptor RNA activator 1                                                 | SRA1     | 10011        |
| 219055_at    | S1 RNA binding domain 1                                                          | SRBD1    | 55133        |
| 204675_at    | steroid-5-alpha-reductase, alpha polypeptide 1 (3-oxo-5 alpha-steroid delta 4-d  | SRD5A1   | 6715         |
| 241961_at    | steroid 5 alpha-reductase 2-like 2                                               | SRD5A2L2 | 253017       |
| 202308_at    | sterol regulatory element binding transcription factor 1                         | SREBF1   | 6720         |

|              |                                                                                  |                   |        |
|--------------|----------------------------------------------------------------------------------|-------------------|--------|
| 201247_at    | sterol regulatory element binding transcription factor 2                         | <i>SREBF2</i>     | 6721   |
| 202401_s_at  | serum response factor (c-fos serum response element-binding transcription fact   | <i>SRF</i>        | 6722   |
| 228628_at    | SLIT-ROBO Rho GTPase activating protein 2 pseudogene 1                           | <i>SRGAP2P1</i>   | 653464 |
| 232095_at    | SLIT-ROBO Rho GTPase activating protein 2 pseudogene 1                           | <i>SRGAP2P1</i>   | ---    |
| 229067_at    | SLIT-ROBO Rho GTPase activating protein 2 pseudogene 1                           | <i>SRGAP2P1</i>   | 653464 |
| 1568957_x_at | SLIT-ROBO Rho GTPase activating protein 2 pseudogene 1                           | <i>SRGAP2P1</i>   | 653464 |
| 208920_at    | sorcin                                                                           | <i>SRI</i>        | 6717   |
| 203605_at    | signal recognition particle 54kDa                                                | <i>SRP54</i>      | 6729   |
| 203182_s_at  | SFRS protein kinase 2                                                            | <i>SRPK2</i>      | 6733   |
| 203181_x_at  | SFRS protein kinase 2                                                            | <i>SRPK2</i>      | 6733   |
| 1558254_s_at | SFRS protein kinase 2                                                            | <i>SRPK2</i>      | 6733   |
| 200918_s_at  | signal recognition particle receptor ('docking protein')                         | <i>SRPR</i>       | 6734   |
| 200917_s_at  | signal recognition particle receptor ('docking protein')                         | <i>SRPR</i>       | 6734   |
| 219205_at    | serine racemase                                                                  | <i>SRR</i>        | 63826  |
| 201225_s_at  | serine/arginine repetitive matrix 1                                              | <i>SRRM1</i>      | 10250  |
| 201138_s_at  | Sjogren syndrome antigen B (autoantigen La)                                      | <i>SSB</i>        | 6741   |
| 201894_s_at  | signal sequence receptor, alpha (translocon-associated protein alpha)            | <i>SSR1</i>       | 6745   |
| 200891_s_at  | signal sequence receptor, alpha (translocon-associated protein alpha)            | <i>SSR1</i>       | 6745   |
| 200889_s_at  | signal sequence receptor, alpha (translocon-associated protein alpha)            | <i>SSR1</i>       | 6745   |
| 200652_at    | signal sequence receptor, beta (translocon-associated protein beta)              | <i>SSR2</i>       | 6746   |
| 223052_x_at  | SSU72 RNA polymerase II CTD phosphatase homolog (S. cerevisiae)                  | <i>SSU72</i>      | ---    |
| 203016_s_at  | synovial sarcoma, X breakpoint 2 interacting protein                             | <i>SSX2IP</i>     | 117178 |
| 208667_s_at  | suppression of tumorigenicity 13 (colon carcinoma) (Hsp70 interacting protein)   | <i>ST13</i>       | 6767   |
| 208322_s_at  | ST3 beta-galactoside alpha-2,3-sialyltransferase 1                               | <i>ST3GAL1</i>    | 6482   |
| 203217_s_at  | ST3 beta-galactoside alpha-2,3-sialyltransferase 5                               | <i>ST3GAL5</i>    | 8869   |
| 213355_at    | ST3 beta-galactoside alpha-2,3-sialyltransferase 6                               | <i>ST3GAL6</i>    | 10402  |
| 210942_s_at  | ST3 beta-galactoside alpha-2,3-sialyltransferase 6                               | <i>ST3GAL6</i>    | 10402  |
| 201998_at    | ST6 beta-galactosamide alpha-2,6-sialyltransferase 1                             | <i>ST6GAL1</i>    | 6480   |
| 1555123_at   | ST6 beta-galactosamide alpha-2,6-sialyltransferase 2                             | <i>ST6GAL2</i>    | 84620  |
| 204542_at    | ST6 (alpha-N-acetyl-neuraminyl-2,3-beta-galactosyl-1,3)-N-acetylgalactosaminic   | <i>ST6GALNAC2</i> | 10610  |
| 235334_at    | ST6 (alpha-N-acetyl-neuraminyl-2,3-beta-galactosyl-1,3)-N-acetylgalactosaminic   | <i>ST6GALNAC3</i> | 256435 |
| 242943_at    | ST8 alpha-N-acetyl-neuraminide alpha-2,8-sialyltransferase 4                     | <i>ST8SIA4</i>    | 7903   |
| 230836_at    | ST8 alpha-N-acetyl-neuraminide alpha-2,8-sialyltransferase 4                     | <i>ST8SIA4</i>    | 7903   |
| 230261_at    | ST8 alpha-N-acetyl-neuraminide alpha-2,8-sialyltransferase 4                     | <i>ST8SIA4</i>    | 7903   |
| 206925_at    | ST8 alpha-N-acetyl-neuraminide alpha-2,8-sialyltransferase 4                     | <i>ST8SIA4</i>    | 7903   |
| 209022_at    | stromal antigen 2                                                                | <i>STAG2</i>      | 10735  |
| 207983_s_at  | stromal antigen 2                                                                | <i>STAG2</i>      | 10735  |
| 209023_s_at  | stromal antigen 2                                                                | <i>STAG2</i>      | 10735  |
| 209649_at    | signal transducing adaptor molecule (SH3 domain and ITAM motif) 2                | <i>STAM2</i>      | 10254  |
| 227607_at    | STAM binding protein-like 1                                                      | <i>STAMBPL1</i>   | 57559  |
| 232322_x_at  | StAR-related lipid transfer (START) domain containing 10                         | <i>STARD10</i>    | 10809  |
| 223103_at    | StAR-related lipid transfer (START) domain containing 10                         | <i>STARD10</i>    | 10809  |
| 226390_at    | StAR-related lipid transfer (START) domain containing 4                          | <i>STARD4</i>     | 134429 |
| 200028_s_at  | StAR-related lipid transfer (START) domain containing 7                          | <i>STARD7</i>     | 56910  |
| 225636_at    | signal transducer and activator of transcription 2, 113kDa                       | <i>STAT2</i>      | 6773   |
| 205170_at    | signal transducer and activator of transcription 2, 113kDa                       | <i>STAT2</i>      | 6773   |
| 225289_at    | signal transducer and activator of transcription 3 (acute-phase response factor) | <i>STAT3</i>      | 6774   |
| 208991_at    | signal transducer and activator of transcription 3 (acute-phase response factor) | <i>STAT3</i>      | 6774   |
| 208992_s_at  | signal transducer and activator of transcription 3 (acute-phase response factor) | <i>STAT3</i>      | 6774   |
| 212550_at    | signal transducer and activator of transcription 5B                              | <i>STAT5B</i>     | 6777   |
| 205026_at    | signal transducer and activator of transcription 5B                              | <i>STAT5B</i>     | 6777   |
| 1555088_x_at | signal transducer and activator of transcription 5B                              | <i>STAT5B</i>     | 6777   |
| 201331_s_at  | signal transducer and activator of transcription 6, interleukin-4 induced        | <i>STAT6</i>      | 6778   |
| 206835_at    | statherin                                                                        | <i>STATH</i>      | 6779   |
| 207320_x_at  | staufer, RNA binding protein, homolog 1 (Drosophila)                             | <i>STAU1</i>      | 6780   |
| 213037_x_at  | staufer, RNA binding protein, homolog 1 (Drosophila)                             | <i>STAU1</i>      | 6780   |
| 208948_s_at  | staufer, RNA binding protein, homolog 1 (Drosophila)                             | <i>STAU1</i>      | 6780   |
| 204226_at    | staufer, RNA binding protein, homolog 2 (Drosophila)                             | <i>STAU2</i>      | 27067  |
| 202558_s_at  | stress 70 protein chaperone, microsome-associated, 60kDa                         | <i>STCH</i>       | 6782   |
| 202557_at    | stress 70 protein chaperone, microsome-associated, 60kDa                         | <i>STCH</i>       | 6782   |
| 225987_at    | STEAP family member 4                                                            | <i>STEAP4</i>     | 79689  |
| 205339_at    | SCL/TAL1 interrupting locus                                                      | <i>STIL</i>       | 6491   |
| 202764_at    | stromal interaction molecule 1                                                   | <i>STIM1</i>      | 6786   |

|              |                                                                                   |                                 |              |
|--------------|-----------------------------------------------------------------------------------|---------------------------------|--------------|
| 225246_at    | stromal interaction molecule 2                                                    | <i>STIM2</i>                    | 57620        |
| 234140_s_at  | stromal interaction molecule 2                                                    | <i>STIM2</i>                    | 57620        |
| 225250_at    | stromal interaction molecule 2                                                    | <i>STIM2</i>                    | 57620        |
| 40420_at     | serine/threonine kinase 10                                                        | <i>STK10</i>                    | 6793         |
| 203047_at    | serine/threonine kinase 10                                                        | <i>STK10</i>                    | 6793         |
| 231017_at    | serine/threonine kinase 11                                                        | <i>STK11</i>                    | 6794         |
| 205214_at    | serine/threonine kinase 17b                                                       | <i>STK17B</i>                   | 9262         |
| 204090_at    | serine/threonine kinase 19                                                        | <i>STK19</i>                    | 8859         |
| 228086_at    | serine/threonine kinase 33                                                        | <i>STK33</i>                    | 65975        |
| 202786_at    | serine threonine kinase 39 (STE20/SPS1 homolog, yeast)                            | <i>STK39</i>                    | 27347        |
| 211085_s_at  | serine/threonine kinase 4                                                         | <i>STK4</i>                     | 6789         |
| 223852_s_at  | serine/threonine kinase 40                                                        | <i>STK40</i>                    | 83931        |
| 222557_at    | stathmin-like 3                                                                   | <i>STMN3</i>                    | 50861        |
| 201061_s_at  | stomatin                                                                          | <i>STOM</i>                     | 2040         |
| 201060_x_at  | stomatin                                                                          | <i>STOM</i>                     | 2040         |
| 226822_at    | storkhead box 2                                                                   | <i>STOX2</i>                    | 56977        |
| 229513_at    | Spermatid perinuclear RNA binding protein                                         | <i>STRBP</i>                    | 55342        |
| 205520_at    | striatin, calmodulin binding protein                                              | <i>STRN</i>                     | 6801         |
| 217903_at    | striatin, calmodulin binding protein 4                                            | <i>STRN4</i>                    | 29888        |
| 210190_at    | syntaxin 11                                                                       | <i>STX11</i>                    | 8676         |
| 209238_at    | syntaxin 3                                                                        | <i>STX3</i>                     | 6809         |
| 216985_s_at  | syntaxin 3                                                                        | <i>STX3</i>                     | 6809         |
| 203530_s_at  | syntaxin 4                                                                        | <i>STX4</i>                     | 6810         |
| 229395_at    | syntaxin 4                                                                        | <i>STX4</i>                     | 6810         |
| 203330_s_at  | syntaxin 5                                                                        | <i>STX5</i>                     | 6811         |
| 212800_at    | syntaxin 6                                                                        | <i>STX6</i>                     | 10228        |
| 204690_at    | syntaxin 8                                                                        | <i>STX8</i>                     | 9482         |
| 209367_at    | syntaxin binding protein 2                                                        | <i>STXBP2</i>                   | 6813         |
| 203310_at    | syntaxin binding protein 3                                                        | <i>STXBP3</i>                   | 6814         |
| 226794_at    | syntaxin binding protein 5 (tomosyn)                                              | <i>STXBPS</i>                   | 134957       |
| 1568896_at   | syntaxin binding protein 5-like                                                   | <i>STXBPSL</i>                  | 9515         |
| 215518_at    | syntaxin binding protein 5-like                                                   | <i>STXBPSL</i>                  | 9515         |
| 221696_s_at  | serine/threonine/tyrosine kinase 1                                                | <i>STYK1</i>                    | 55359        |
| 230370_x_at  | serine/threonine/tyrosine interacting-like 1                                      | <i>STYXL1</i>                   | 51657        |
| 221727_at    | SUB1 homolog ( <i>S. cerevisiae</i> )                                             | <i>SUB1</i>                     | 10923        |
| 237784_at    | SUB1 homolog ( <i>S. cerevisiae</i> )                                             | <i>SUB1</i>                     | 10923        |
| 202930_s_at  | succinate-CoA ligase, ADP-forming, beta subunit                                   | <i>SUCLA2</i>                   | 8803         |
| 214835_s_at  | succinate-CoA ligase, GDP-forming, beta subunit                                   | <i>SUCLG2</i>                   | 8801         |
| 215772_x_at  | succinate-CoA ligase, GDP-forming, beta subunit                                   | <i>SUCLG2</i>                   | 8801         |
| 223939_at    | succinate receptor 1                                                              | <i>SUCNR1</i>                   | 56670        |
| 224309_s_at  | SGT1, suppressor of G2 allele of SKP1 ( <i>S. cerevisiae</i> )                    | <i>SUGT1</i>                    | 10910        |
| 223329_x_at  | SGT1, suppressor of G2 allele of SKP1 ( <i>S. cerevisiae</i> )                    | <i>SUGT1</i>                    | 10910        |
| 223330_s_at  | SGT1, suppressor of G2 allele of SKP1 ( <i>S. cerevisiae</i> )                    | <i>SUGT1</i>                    | 10910        |
| 1554143_a_at | SGT1, suppressor of G2 allele of SKP1 like 1 ( <i>S. cerevisiae</i> )             | <i>SUGT1L1</i>                  | 100130423 ,  |
| 1568951_at   | suppressor of hairy wing homolog 4 ( <i>Drosophila</i> )                          | <i>SUHW4</i>                    | 54816        |
| 221213_s_at  | suppressor of hairy wing homolog 4 ( <i>Drosophila</i> )                          | <i>SUHW4</i>                    | 54816        |
| 212353_at    | sulfatase 1                                                                       | <i>SULF1</i>                    | 23213        |
| 233555_s_at  | sulfatase 2                                                                       | <i>SULF2</i>                    | 55959        |
| 224724_at    | sulfatase 2                                                                       | <i>SULF2</i>                    | 55959        |
| 215299_x_at  | sulfotransferase family, cytosolic, 1A, phenol-preferring, member 1               | <i>SULT1A1</i>                  | 6817         |
| 203615_x_at  | sulfotransferase family, cytosolic, 1A, phenol-preferring, member 1               | <i>SULT1A1</i>                  | 6817         |
| 238995_at    | Sulfotransferase family, cytosolic, 1A, phenol-preferring, member 1               | <i>SULT1A1</i>                  | 6817         |
| 211385_x_at  | sulfotransferase family, cytosolic, 1A, phenol-preferring, member 2               | <i>SULT1A2</i>                  | 6799         |
| 210580_x_at  | sulfotransferase family, cytosolic, 1A, phenol-preferring, member 3 /// sulfotran | <i>SULT1A3</i> /// <i>SULT1</i> | 445329 /// t |
| 207601_at    | sulfotransferase family, cytosolic, 1B, member 1                                  | <i>SULT1B1</i>                  | 27284        |
| 222940_at    | sulfotransferase family 1E, estrogen-preferring, member 1                         | <i>SULT1E1</i>                  | 6783         |
| 226850_at    | sulfatase modifying factor 1                                                      | <i>SUMF1</i>                    | 285362       |
| 200740_s_at  | SMT3 suppressor of mif two 3 homolog 3 ( <i>S. cerevisiae</i> )                   | <i>SUMO3</i>                    | 6612         |
| 217815_at    | suppressor of Ty 16 homolog ( <i>S. cerevisiae</i> )                              | <i>SUPT16H</i>                  | 11198        |
| 201483_s_at  | suppressor of Ty 4 homolog 1 ( <i>S. cerevisiae</i> )                             | <i>SUPT4H1</i>                  | 6827         |
| 208420_x_at  | suppressor of Ty 6 homolog ( <i>S. cerevisiae</i> )                               | <i>SUPT6H</i>                   | 6830         |
| 208831_x_at  | suppressor of Ty 6 homolog ( <i>S. cerevisiae</i> )                               | <i>SUPT6H</i>                   | 6830         |
| 201837_s_at  | suppressor of Ty 7 ( <i>S. cerevisiae</i> )-like                                  | <i>SUPT7L</i>                   | 9913         |

|              |                                                                                   |                 |        |
|--------------|-----------------------------------------------------------------------------------|-----------------|--------|
| 217646_at    | surfeit 1                                                                         | <i>SURF1</i>    | 6834   |
| 225038_s_at  | surfeit 6                                                                         | <i>SURF6</i>    | 6838   |
| 226264_at    | sushi domain containing 1                                                         | <i>SUSD1</i>    | 64420  |
| 222566_at    | suppressor of variegation 4-20 homolog 1 (Drosophila)                             | <i>SUV420H1</i> | 51111  |
| 218242_s_at  | suppressor of variegation 4-20 homolog 1 (Drosophila)                             | <i>SUV420H1</i> | 51111  |
| 1566190_at   | Suppressor of zeste 12 homolog (Drosophila)                                       | <i>SUZ12</i>    | 23512  |
| 212287_at    | suppressor of zeste 12 homolog (Drosophila)                                       | <i>SUZ12</i>    | 23512  |
| 216086_at    | synaptic vesicle glycoprotein 2C                                                  | <i>SV2C</i>     | 22987  |
| 236927_at    | sushi, von Willebrand factor type A, EGF and pentraxin domain containing 1        | <i>SVEP1</i>    | 79987  |
| 202565_s_at  | supervillin                                                                       | <i>SVIL</i>     | 6840   |
| 225154_at    | synapse associated protein 1, SAP47 homolog (Drosophila)                          | <i>SYAP1</i>    | 94056  |
| 202829_s_at  | synaptobrevin-like 1                                                              | <i>SYBL1</i>    | 6845   |
| 216917_s_at  | synaptonemal complex protein 1                                                    | <i>SYCP1</i>    | 6847   |
| 206740_x_at  | synaptonemal complex protein 1                                                    | <i>SYCP1</i>    | 6847   |
| 206546_at    | synaptonemal complex protein 2                                                    | <i>SYCP2</i>    | 10388  |
| 202553_s_at  | SYF2 homolog, RNA splicing factor ( <i>S. cerevisiae</i> )                        | <i>SYF2</i>     | 25949  |
| 207540_s_at  | spleen tyrosine kinase                                                            | <i>SYK</i>      | 6850   |
| 226068_at    | spleen tyrosine kinase                                                            | <i>SYK</i>      | 6850   |
| 244023_at    | spleen tyrosine kinase                                                            | <i>SYK</i>      | 6850   |
| 237333_at    | Syncoilin, intermediate filament 1                                                | <i>SYNC1</i>    | 81493  |
| 217833_at    | synaptotagmin binding, cytoplasmic RNA interacting protein                        | <i>SYNCRIP</i>  | 10492  |
| 236146_at    | synaptotagmin binding, cytoplasmic RNA interacting protein                        | <i>SYNCRIP</i>  | 10492  |
| 217834_s_at  | synaptotagmin binding, cytoplasmic RNA interacting protein                        | <i>SYNCRIP</i>  | 10492  |
| 209025_s_at  | synaptotagmin binding, cytoplasmic RNA interacting protein                        | <i>SYNCRIP</i>  | 10492  |
| 209447_at    | spectrin repeat containing, nuclear envelope 1                                    | <i>SYNE1</i>    | 23345  |
| 242774_at    | spectrin repeat containing, nuclear envelope 2                                    | <i>SYNE2</i>    | 23224  |
| 202761_s_at  | spectrin repeat containing, nuclear envelope 2                                    | <i>SYNE2</i>    | 23224  |
| 204287_at    | synaptogyrin 1                                                                    | <i>SYNGR1</i>   | 9145   |
| 201079_at    | synaptogyrin 2                                                                    | <i>SYNGR2</i>   | 9144   |
| 240257_at    | synaptojanin 2                                                                    | <i>SYNJ2</i>    | 8871   |
| 219156_at    | synaptojanin 2 binding protein                                                    | <i>SYNJ2BP</i>  | 55333  |
| 225721_at    | synaptopodin 2                                                                    | <i>SYNPO2</i>   | 171024 |
| 227662_at    | synaptopodin 2                                                                    | <i>SYNPO2</i>   | 171024 |
| 225895_at    | synaptopodin 2                                                                    | <i>SYNPO2</i>   | 171024 |
| 201259_s_at  | synaptophysin-like 1                                                              | <i>SYPL1</i>    | 6856   |
| 224668_at    | SYS1 Golgi-localized integral membrane protein homolog ( <i>S. cerevisiae</i> )   | <i>SYS1</i>     | 90196  |
| 224670_at    | SYS1 Golgi-localized integral membrane protein homolog ( <i>S. cerevisiae</i> )   | <i>SYS1</i>     | 90196  |
| 209197_at    | synaptotagmin XI                                                                  | <i>SYT11</i>    | 23208  |
| 226086_at    | synaptotagmin XIII                                                                | <i>SYT13</i>    | 57586  |
| 1553654_at   | synaptotagmin XIV                                                                 | <i>SYT14</i>    | 255928 |
| 244227_at    | synaptotagmin VI                                                                  | <i>SYT6</i>     | 148281 |
| 227134_at    | synaptotagmin-like 1                                                              | <i>SYTL1</i>    | 84958  |
| 232914_s_at  | synaptotagmin-like 2                                                              | <i>SYTL2</i>    | 54843  |
| 238423_at    | synaptotagmin-like 3                                                              | <i>SYTL3</i>    | 94120  |
| 1553066_at   | trace amine associated receptor 9                                                 | <i>TAAR9</i>    | 134860 |
| 206552_s_at  | tachykinin, precursor 1 (substance K, substance P, neurokinin 1, neurokinin 2, ne | <i>TAC1</i>     | 6863   |
| 218308_at    | transforming, acidic coiled-coil containing protein 3                             | <i>TACC3</i>    | 10460  |
| 225455_at    | transcriptional adaptor 1 (HFI1 homolog, yeast)-like                              | <i>TADA1L</i>   | 117143 |
| 215273_s_at  | transcriptional adaptor 3 (NGG1 homolog, yeast)-like                              | <i>TADA3L</i>   | 10474  |
| 200055_at    | TAF10 RNA polymerase II, TATA box binding protein (TBP)-associated factor, 30k    | <i>TAF10</i>    | 6881   |
| 227891_s_at  | TAF15 RNA polymerase II, TATA box binding protein (TBP)-associated factor, 68k    | <i>TAF15</i>    | 8148   |
| 206613_s_at  | TATA box binding protein (TBP)-associated factor, RNA polymerase I, A, 48kDa      | <i>TAF1A</i>    | 9015   |
| 213090_s_at  | TAF4 RNA polymerase II, TATA box binding protein (TBP)-associated factor, 135k    | <i>TAF4</i>     | 6874   |
| 1553528_a_at | TAF5 RNA polymerase II, TATA box binding protein (TBP)-associated factor, 100k    | <i>TAF5</i>     | 6877   |
| 210053_at    | TAF5 RNA polymerase II, TATA box binding protein (TBP)-associated factor, 100k    | <i>TAF5</i>     | 6877   |
| 1554415_at   | TAF5-like RNA polymerase II, p300/CBP-associated factor (PCAF)-associated fact    | <i>TAF5L</i>    | 27097  |
| 213654_at    | TAF5-like RNA polymerase II, p300/CBP-associated factor (PCAF)-associated fact    | <i>TAF5L</i>    | 27097  |
| 201023_at    | TAF7 RNA polymerase II, TATA box binding protein (TBP)-associated factor, 55k     | <i>TAF7</i>     | 6879   |
| 221616_s_at  | TAF9B RNA polymerase II, TATA box binding protein (TBP)-associated factor, 31k    | <i>TAF9B</i>    | 51616  |
| 221617_at    | TAF9B RNA polymerase II, TATA box binding protein (TBP)-associated factor, 31k    | <i>TAF9B</i>    | 51616  |
| 228483_s_at  | TAF9B RNA polymerase II, TATA box binding protein (TBP)-associated factor, 31k    | <i>TAF9B</i>    | 51616  |
| 242388_x_at  | T-cell activation GTPase activating protein                                       | <i>TAGAP</i>    | ---    |
| 1552541_at   | T-cell activation GTPase activating protein                                       | <i>TAGAP</i>    | 117289 |

|              |                                                                                 |                    |              |
|--------------|---------------------------------------------------------------------------------|--------------------|--------------|
| 234050_at    | T-cell activation GTPase activating protein                                     | TAGAP              | 117289       |
| 229723_at    | T-cell activation GTPase activating protein                                     | TAGAP              | 117289       |
| 1552542_s_at | T-cell activation GTPase activating protein                                     | TAGAP              | 117289       |
| 210978_s_at  | transgelin 2                                                                    | TAGLN2             | 8407         |
| 200916_at    | transgelin 2                                                                    | TAGLN2             | 8407         |
| 1561651_s_at | T-cell acute lymphocytic leukemia 1                                             | TAL1               | 6886         |
| 225308_s_at  | tetratricopeptide repeat, ankyrin repeat and coiled-coil containing 1           | TANC1              | 85461        |
| 234870_at    | tetratricopeptide repeat, ankyrin repeat and coiled-coil containing 1           | TANC1              | 85461        |
| 224952_at    | tetratricopeptide repeat, ankyrin repeat and coiled-coil containing 2           | TANC2              | 26115        |
| 208425_s_at  | tetratricopeptide repeat, ankyrin repeat and coiled-coil containing 2           | TANC2              | 26115        |
| 1553042_a_at | T-cell activation NFKB-like protein                                             | TA-NFKBH           | 84807        |
| 230052_s_at  | T-cell activation NFKB-like protein                                             | TA-NFKBH           | 84807        |
| 241889_at    | T-cell activation NFKB-like protein                                             | TA-NFKBH           | 84807        |
| 243376_at    | TRAF family member-associated NFKB activator                                    | TANK               | 10010        |
| 209451_at    | TRAF family member-associated NFKB activator                                    | TANK               | 10010        |
| 207616_s_at  | TRAF family member-associated NFKB activator                                    | TANK               | 10010        |
| 210458_s_at  | TRAF family member-associated NFKB activator                                    | TANK               | 10010        |
| 227454_at    | TAO kinase 1                                                                    | TAOK1              | 57551        |
| 210294_at    | TAP binding protein (tapasin)                                                   | TAPBP              | 6892         |
| 218747_s_at  | TAP binding protein-like                                                        | TAPBPL             | 55080        |
| 218746_at    | TAP binding protein-like                                                        | TAPBPL             | 55080        |
| 202813_at    | TAR (HIV-1) RNA binding protein 1                                               | TARBP1             | 6894         |
| 215806_x_at  | T cell receptor gamma constant 2 /// T cell receptor gamma variable 9 /// TCR g | TARP /// TRGC2 /// | 6967         |
| 216920_s_at  | T cell receptor gamma constant 2 /// T cell receptor gamma variable 9 /// TCR g | TARP /// TRGC2 /// | 445347 /// t |
| 211144_x_at  | T cell receptor gamma constant 2 /// T cell receptor gamma variable 9 /// TCR g | TARP /// TRGC2 /// | 445347 /// t |
| 209813_x_at  | T cell receptor gamma constant 2 /// T cell receptor gamma variable 9 /// TCR g | TARP /// TRGC2 /// | 445347       |
| 240206_at    | Threonyl-tRNA synthetase                                                        | TARS               | 6897         |
| 221391_at    | taste receptor, type 2, member 14                                               | TAS2R14            | 50840        |
| 1570384_at   | taste receptor, type 2, member 48                                               | TAS2R48            | 259294       |
| 221398_at    | taste receptor, type 2, member 8                                                | TAS2R8             | 50836        |
| 219443_at    | taspace, threonine aspartase, 1                                                 | TASP1              | 55617        |
| 200976_s_at  | Tax1 (human T-cell leukemia virus type I) binding protein 1                     | TAX1BP1            | 8887         |
| 200977_s_at  | Tax1 (human T-cell leukemia virus type I) binding protein 1                     | TAX1BP1            | 8887         |
| 209154_at    | Tax1 (human T-cell leukemia virus type I) binding protein 3                     | TAX1BP3            | 30851        |
| 215464_s_at  | Tax1 (human T-cell leukemia virus type I) binding protein 3                     | TAX1BP3            | 30851        |
| 212350_at    | TBC1 (tre-2/USP6, BUB2, cdc16) domain family, member 1                          | TBC1D1             | 23216        |
| 1569566_at   | TBC1 (tre-2/USP6, BUB2, cdc16) domain family, member 1                          | TBC1D1             | 23216        |
| 228258_at    | TBC1 domain family, member 10C                                                  | TBC1D10C           | 374403       |
| 221858_at    | TBC1 domain family, member 12                                                   | TBC1D12            | 23232        |
| 224622_at    | TBC1 domain family, member 14                                                   | TBC1D14            | 57533        |
| 218268_at    | TBC1 domain family, member 15                                                   | TBC1D15            | 64786        |
| 218466_at    | TBC1 domain family, member 17                                                   | TBC1D17            | 79735        |
| 222173_s_at  | TBC1 domain family, member 2                                                    | TBC1D2             | 55357        |
| 226664_at    | TBC1 domain family, member 20                                                   | TBC1D20            | 128637       |
| 33778_at     | TBC1 domain family, member 22A                                                  | TBC1D22A           | 25771        |
| 210144_at    | TBC1 domain family, member 22A                                                  | TBC1D22A           | 25771        |
| 209650_s_at  | TBC1 domain family, member 22A                                                  | TBC1D22A           | 25771        |
| 225121_at    | TBC1 domain family, member 23                                                   | TBC1D23            | 55773        |
| 201814_at    | TBC1 domain family, member 5                                                    | TBC1D5             | 9779         |
| 201813_s_at  | TBC1 domain family, member 5                                                    | TBC1D5             | 9779         |
| 223461_at    | TBC1 domain family, member 7                                                    | TBC1D7             | 51256        |
| 212052_s_at  | TBC1 domain family, member 9B (with GRAM domain)                                | TBC1D9B            | 23061        |
| 215994_x_at  | TBC1 domain family, member 9B (with GRAM domain)                                | TBC1D9B            | 23061        |
| 212054_x_at  | TBC1 domain family, member 9B (with GRAM domain)                                | TBC1D9B            | 23061        |
| 218520_at    | TANK-binding kinase 1                                                           | TBK1               | 29110        |
| 213401_s_at  | Transducin (beta)-like 1X-linked                                                | TBL1X              | 6907         |
| 213400_s_at  | transducin (beta)-like 1X-linked                                                | TBL1X              | 6907         |
| 201869_s_at  | transducin (beta)-like 1X-linked                                                | TBL1X              | 6907         |
| 201867_s_at  | transducin (beta)-like 1X-linked                                                | TBL1X              | 6907         |
| 201868_s_at  | transducin (beta)-like 1X-linked                                                | TBL1X              | 6907         |
| 233633_at    | Transducin (beta)-like 1X-linked receptor 1                                     | TBL1XR1            | 79718        |
| 222633_at    | transducin (beta)-like 1X-linked receptor 1                                     | TBL1XR1            | 79718        |
| 230320_at    | transforming growth factor beta regulator 1                                     | TBRG1              | 84897        |

|              |                                                                                   |                   |        |
|--------------|-----------------------------------------------------------------------------------|-------------------|--------|
| 220961_s_at  | transforming growth factor beta regulator 4                                       | <i>TBRG4</i>      | 9238   |
| 1559840_s_at | T-box 18                                                                          | <i>TBX18</i>      | 9096   |
| 220684_at    | T-box 21                                                                          | <i>TBX21</i>      | 30009  |
| 208130_s_at  | thromboxane A synthase 1 (platelet, cytochrome P450, family 5, subfamily A)       | <i>TBXAS1</i>     | 6916   |
| 1553132_a_at | tandem C2 domains, nuclear                                                        | <i>TC2N</i>       | 123036 |
| 1561254_at   | hypothetical LOC340340                                                            | <i>tcag7.1188</i> | 340340 |
| 240061_at    | Hypothetical protein LOC54103                                                     | <i>tcag7.1314</i> | 54103  |
| 1562664_at   | hypothetical protein LOC286009                                                    | <i>tcag7.929</i>  | 286009 |
| 227279_at    | transcription elongation factor A (SII)-like 3                                    | <i>TCEAL3</i>     | 85012  |
| 202824_s_at  | transcription elongation factor B (SIII), polypeptide 1 (15kDa, elongin C)        | <i>TCEB1</i>      | 6921   |
| 200085_s_at  | transcription elongation factor B (SIII), polypeptide 2 (18kDa, elongin B)        | <i>TCEB2</i>      | 6923   |
| 202818_s_at  | transcription elongation factor B (SIII), polypeptide 3 (110kDa, elongin A)       | <i>TCEB3</i>      | 6924   |
| 202396_at    | transcription elongation regulator 1                                              | <i>TCERG1</i>     | 10915  |
| 229706_at    | transcription elongation regulator 1                                              | <i>TCERG1</i>     | 10915  |
| 235925_at    | Transcription factor 12 (HTF4, helix-loop-helix transcription factors 4)          | <i>TCF12</i>      | 6938   |
| 208986_at    | transcription factor 12 (HTF4, helix-loop-helix transcription factors 4)          | <i>TCF12</i>      | 6938   |
| 215511_at    | transcription factor 20 (AR1)                                                     | <i>TCF20</i>      | 6942   |
| 215260_s_at  | transcription factor 3 (E2A immunoglobulin enhancer binding factors E12/E47)      | <i>TCF3</i>       | 6929   |
| 212386_at    | transcription factor 4                                                            | <i>TCF4</i>       | 6925   |
| 212382_at    | transcription factor 4                                                            | <i>TCF4</i>       | 6925   |
| 213891_s_at  | transcription factor 4                                                            | <i>TCF4</i>       | 6925   |
| 203753_at    | transcription factor 4                                                            | <i>TCF4</i>       | 6925   |
| 212385_at    | transcription factor 4                                                            | <i>TCF4</i>       | 6925   |
| 212387_at    | transcription factor 4                                                            | <i>TCF4</i>       | 6925   |
| 205255_x_at  | transcription factor 7 (T-cell specific, HMG-box)                                 | <i>TCF7</i>       | 6932   |
| 212759_s_at  | transcription factor 7-like 2 (T-cell specific, HMG-box)                          | <i>TCF7L2</i>     | 6934   |
| 204158_s_at  | T-cell, immune regulator 1, ATPase, H+ transporting, lysosomal V0 subunit A3      | <i>TCIRG1</i>     | 10312  |
| 39318_at     | T-cell leukemia/lymphoma 1A                                                       | <i>TCL1A</i>      | 8115   |
| 205513_at    | transcobalamin I (vitamin B12 binding protein, R binder family)                   | <i>TCN1</i>       | 6947   |
| 202384_s_at  | Treacher Collins-Franceschetti syndrome 1                                         | <i>TCOF1</i>      | 6949   |
| 233472_at    | t-complex 11 (mouse)-like 1                                                       | <i>TCP11L1</i>    | 55346  |
| 1559413_at   | t-complex 11 (mouse)-like 2                                                       | <i>TCP11L2</i>    | 255394 |
| 1553861_at   | t-complex 11 (mouse)-like 2                                                       | <i>TCP11L2</i>    | 255394 |
| 1565525_a_at | t-complex 11 (mouse)-like 2                                                       | <i>TCP11L2</i>    | 255394 |
| 1557945_at   | T-complex-associated-testis-expressed 3                                           | <i>TCTE3</i>      | 6991   |
| 1553635_s_at | Tctex1 domain containing 1                                                        | <i>TCTEX1D1</i>   | 200132 |
| 212123_at    | tectonic family member 3                                                          | <i>TCTN3</i>      | 26123  |
| 208089_s_at  | tudor domain containing 3                                                         | <i>TDRD3</i>      | 81550  |
| 218584_at    | tectonic 1                                                                        | <i>TECT1</i>      | 79600  |
| 200803_s_at  | testis enhanced gene transcript (BAX inhibitor 1)                                 | <i>TEGT</i>       | 7009   |
| 228670_at    | telomerase-associated protein 1                                                   | <i>TEP1</i>       | 7011   |
| 203449_s_at  | telomeric repeat binding factor (NIMA-interacting) 1                              | <i>TERF1</i>      | 7013   |
| 203448_s_at  | telomeric repeat binding factor (NIMA-interacting) 1                              | <i>TERF1</i>      | 7013   |
| 229790_at    | telomeric repeat binding factor 2                                                 | <i>TERF2</i>      | 7014   |
| 201174_s_at  | telomeric repeat binding factor 2, interacting protein                            | <i>TERF2IP</i>    | 54386  |
| 202719_s_at  | testis derived transcript (3 LIM domains)                                         | <i>TES</i>        | 26136  |
| 205486_at    | testis-specific kinase 2                                                          | <i>TESK2</i>      | 10420  |
| 218099_at    | testis expressed 2                                                                | <i>TEX2</i>       | 55852  |
| 1562259_at   | testis expressed 9                                                                | <i>TEX9</i>       | 374618 |
| 243198_at    | testis expressed 9                                                                | <i>TEX9</i>       | 374618 |
| 203177_x_at  | transcription factor A, mitochondrial                                             | <i>TFAM</i>       | 7019   |
| 1555348_at   | transcription factor AP-2 epsilon (activating enhancer binding protein 2 epsilon) | <i>TFAP2E</i>     | 339488 |
| 228075_x_at  | transcription factor B1, mitochondrial                                            | <i>TFB1M</i>      | 51106  |
| 218605_at    | transcription factor B2, mitochondrial                                            | <i>TFB2M</i>      | 64216  |
| 212330_at    | transcription factor Dp-1                                                         | <i>TFDP1</i>      | 7027   |
| 242939_at    | transcription factor Dp-1                                                         | <i>TFDP1</i>      | 7027   |
| 242538_at    | Transcription factor Dp-1                                                         | <i>TFDP1</i>      | 7027   |
| 204147_s_at  | transcription factor Dp-1                                                         | <i>TFDP1</i>      | 7027   |
| 212457_at    | transcription factor binding to IGHM enhancer 3                                   | <i>TFE3</i>       | 7030   |
| 1565347_s_at | transcription factor binding to IGHM enhancer 3                                   | <i>TFE3</i>       | 7030   |
| 217839_at    | TRK-fused gene                                                                    | <i>TFG</i>        | 10342  |
| 210664_s_at  | tissue factor pathway inhibitor (lipoprotein-associated coagulation inhibitor)    | <i>TFPI</i>       | 7035   |
| 209676_at    | tissue factor pathway inhibitor (lipoprotein-associated coagulation inhibitor)    | <i>TFPI</i>       | 7035   |

|              |                                                                                      |                                           |              |
|--------------|--------------------------------------------------------------------------------------|-------------------------------------------|--------------|
| 215447_at    | Tissue factor pathway inhibitor (lipoprotein-associated coagulation inhibitor)       | <i>TFPI</i>                               | 7035         |
| 209277_at    | tissue factor pathway inhibitor 2                                                    | <i>TFPI2</i>                              | 7980         |
| 237215_s_at  | transferrin receptor (p90, CD71)                                                     | <i>TFRC</i>                               | 7037         |
| 207332_s_at  | transferrin receptor (p90, CD71)                                                     | <i>TFRC</i>                               | 7037         |
| 208691_at    | transferrin receptor (p90, CD71)                                                     | <i>TFRC</i>                               | 7037         |
| 237214_at    | transferrin receptor (p90, CD71)                                                     | <i>TFRC</i>                               | 7037         |
| 205016_at    | transforming growth factor, alpha                                                    | <i>TGFA</i>                               | 7039         |
| 203085_s_at  | transforming growth factor, beta 1                                                   | <i>TGFB1</i>                              | 7040         |
| 236561_at    | Transforming growth factor, beta receptor I (activin A receptor type II-like kinase) | <i>TGFBR1</i>                             | 7046         |
| 224793_s_at  | transforming growth factor, beta receptor I (activin A receptor type II-like kinase) | <i>TGFBR1</i>                             | 7046         |
| 206943_at    | transforming growth factor, beta receptor I (activin A receptor type II-like kinase) | <i>TGFBR1</i>                             | 7046         |
| 207334_s_at  | transforming growth factor, beta receptor II (70/80kDa)                              | <i>TGFBR2</i>                             | 7048         |
| 204731_at    | transforming growth factor, beta receptor III                                        | <i>TGFBR3</i>                             | 7049         |
| 203313_s_at  | TGFB-induced factor homeobox 1                                                       | <i>TGIF1</i>                              | 7050         |
| 206004_at    | transglutaminase 3 (E polypeptide, protein-glutamine-gamma-glutamyltransferase)      | <i>TGM3</i>                               | 7053         |
| 217566_s_at  | transglutaminase 4 (prostate)                                                        | <i>TGM4</i>                               | 7047         |
| 1554608_at   | trans-golgi network protein 2                                                        | <i>TGOLN2</i>                             | 10618        |
| 212040_at    | trans-golgi network protein 2                                                        | <i>TGOLN2</i>                             | 10618        |
| 219596_at    | THAP domain containing 10                                                            | <i>THAP10</i>                             | 56906        |
| 227636_at    | THAP domain containing 5                                                             | <i>THAP5</i>                              | 168451       |
| 230169_at    | THAP domain containing 6                                                             | <i>THAP6</i>                              | 152815       |
| 228500_at    | THAP domain containing 8                                                             | <i>THAP8</i>                              | 199745       |
| 203887_s_at  | thrombomodulin                                                                       | <i>THBD</i>                               | 7056         |
| 203888_at    | thrombomodulin                                                                       | <i>THBD</i>                               | 7056         |
| 237252_at    | thrombomodulin                                                                       | <i>THBD</i>                               | 7056         |
| 215775_at    | Thrombospondin 1                                                                     | <i>THBS1</i>                              | 7057         |
| 204776_at    | thrombospondin 4                                                                     | <i>THBS4</i>                              | 7060         |
| 204064_at    | THO complex 1                                                                        | <i>THOC1</i>                              | 9984         |
| 209418_s_at  | THO complex 5                                                                        | <i>THOC5</i>                              | 8563         |
| 35846_at     | thyroid hormone receptor, alpha (erythroblastic leukemia viral (v-erb-a) oncogene)   | <i>THRA</i>                               | 7067         |
| 222835_at    | thrombospondin, type I, domain containing 4                                          | <i>THSD4</i>                              | 79875        |
| 214920_at    | thrombospondin, type I, domain containing 7A                                         | <i>THSD7A</i>                             | 221981       |
| 213894_at    | thrombospondin, type I, domain containing 7A                                         | <i>THSD7A</i>                             | 221981       |
| 213025_at    | THUMP domain containing 1                                                            | <i>THUMPD1</i>                            | 55623        |
| 219248_at    | THUMP domain containing 2                                                            | <i>THUMPD2</i>                            | 80745        |
| 223804_s_at  | THUMP domain containing 3                                                            | <i>THUMPD3</i>                            | 25917        |
| 242377_x_at  | THUMP domain containing 3                                                            | <i>THUMPD3</i>                            | 25917        |
| 225730_s_at  | THUMP domain containing 3                                                            | <i>THUMPD3</i>                            | 25917        |
| 225741_at    | THUMP domain containing 3                                                            | <i>THUMPD3</i>                            | 25917        |
| 223711_s_at  | thymocyte nuclear protein 1                                                          | <i>THYN1</i>                              | 29087        |
| 201448_at    | TIA1 cytotoxic granule-associated RNA binding protein                                | <i>TIA1</i>                               | 7072         |
| 201449_at    | TIA1 cytotoxic granule-associated RNA binding protein                                | <i>TIA1</i>                               | 7072         |
| 213191_at    | toll-like receptor adaptor molecule 1                                                | <i>TICAM1</i>                             | 148022       |
| 239431_at    | toll-like receptor adaptor molecule 2                                                | <i>TICAM2</i>                             | 353376 /// 5 |
| 226117_at    | TRAF-interacting protein with a forkhead-associated domain                           | <i>TIFA</i>                               | 92610        |
| 216459_x_at  | tigger transposable element derived 1-like                                           | <i>TIGD1L</i>                             | 414771       |
| 229983_at    | tigger transposable element derived 2                                                | <i>TIGD2</i>                              | 166815       |
| 229789_at    | tigger transposable element derived 3                                                | <i>TIGD3</i>                              | 220359       |
| 1552522_at   | tigger transposable element derived 4                                                | <i>TIGD4</i>                              | 201798       |
| 1552523_a_at | tigger transposable element derived 4                                                | <i>TIGD4</i>                              | 201798       |
| 224365_s_at  | tigger transposable element derived 7                                                | <i>TIGD7</i>                              | 91151        |
| 203046_s_at  | timeless homolog (Drosophila)                                                        | <i>TIMELESS</i>                           | 8914         |
| 1555764_s_at | translocase of inner mitochondrial membrane 10 homolog (yeast)                       | <i>TIMM10</i>                             | 26519        |
| 203342_at    | translocase of inner mitochondrial membrane 17 homolog B (yeast)                     | <i>TIMM17B</i>                            | 10245        |
| 218119_at    | translocase of inner mitochondrial membrane 23 homolog (yeast) /// translocase       | <i>TIMM23</i> /// <i>TIMM.10431</i> /// 6 |              |
| 210800_at    | translocase of inner mitochondrial membrane 8 homolog A (yeast)                      | <i>TIMM8A</i>                             | 1678         |
| 203167_at    | TIMP metalloproteinase inhibitor 2                                                   | <i>TIMP2</i>                              | 7077         |
| 212665_at    | TCDD-inducible poly(ADP-ribose) polymerase                                           | <i>TIPARP</i>                             | 25976        |
| 228619_x_at  | TIP41, TOR signaling pathway regulator-like (S. cerevisiae)                          | <i>TIPRL</i>                              | 261726       |
| 47608_at     | tight junction associated protein 1 (peripheral)                                     | <i>TJAP1</i>                              | 93643        |
| 202011_at    | tight junction protein 1 (zona occludens 1)                                          | <i>TJP1</i>                               | 7082         |
| 202085_at    | tight junction protein 2 (zona occludens 2)                                          | <i>TJP2</i>                               | 9414         |
| 204276_at    | thymidine kinase 2, mitochondrial                                                    | <i>TK2</i>                                | 7084         |

|              |                                                                        |                 |        |
|--------------|------------------------------------------------------------------------|-----------------|--------|
| 216370_s_at  | transketolase-like 1                                                   | <i>TKTL1</i>    | 8277   |
| 214183_s_at  | transketolase-like 1                                                   | <i>TKTL1</i>    | 8277   |
| 203221_at    | transducin-like enhancer of split 1 (E(sp1) homolog, Drosophila)       | <i>TLE1</i>     | 7088   |
| 228340_at    | transducin-like enhancer of split 3 (E(sp1) homolog, Drosophila)       | <i>TLE3</i>     | 7090   |
| 206472_s_at  | transducin-like enhancer of split 3 (E(sp1) homolog, Drosophila)       | <i>TLE3</i>     | 7090   |
| 212769_at    | transducin-like enhancer of split 3 (E(sp1) homolog, Drosophila)       | <i>TLE3</i>     | 7090   |
| 212770_at    | transducin-like enhancer of split 3 (E(sp1) homolog, Drosophila)       | <i>TLE3</i>     | 7090   |
| 211077_s_at  | tousled-like kinase 1                                                  | <i>TLK1</i>     | 9874   |
| 210379_s_at  | tousled-like kinase 1                                                  | <i>TLK1</i>     | 9874   |
| 203254_s_at  | talin 1                                                                | <i>TLN1</i>     | 7094   |
| 223751_x_at  | toll-like receptor 10                                                  | <i>TLR10</i>    | 81793  |
| 223750_s_at  | toll-like receptor 10                                                  | <i>TLR10</i>    | 81793  |
| 204924_at    | toll-like receptor 2                                                   | <i>TLR2</i>     | 7097   |
| 1552798_a_at | toll-like receptor 4                                                   | <i>TLR4</i>     | 7099   |
| 210166_at    | toll-like receptor 5                                                   | <i>TLR5</i>     | 7100   |
| 207446_at    | toll-like receptor 6                                                   | <i>TLR6</i>     | 10333  |
| 221702_s_at  | TM2 domain containing 3                                                | <i>TM2D3</i>    | 80213  |
| 1552426_a_at | TM2 domain containing 3                                                | <i>TM2D3</i>    | 80213  |
| 215033_at    | transmembrane 4 L six family member 1                                  | <i>TM4SF1</i>   | 4071   |
| 219892_at    | transmembrane 6 superfamily member 1                                   | <i>TM6SF1</i>   | 53346  |
| 222477_s_at  | transmembrane 7 superfamily member 3                                   | <i>TM7SF3</i>   | 51768  |
| 209150_s_at  | transmembrane 9 superfamily member 1                                   | <i>TM9SF1</i>   | 10548  |
| 201078_at    | transmembrane 9 superfamily member 2                                   | <i>TM9SF2</i>   | 9375   |
| 228610_at    | Transmembrane 9 superfamily member 3                                   | <i>TM9SF3</i>   | 56889  |
| 217758_s_at  | transmembrane 9 superfamily member 3                                   | <i>TM9SF3</i>   | 56889  |
| 222399_s_at  | transmembrane 9 superfamily member 3                                   | <i>TM9SF3</i>   | 56889  |
| 217730_at    | transmembrane BAX inhibitor motif containing 1                         | <i>TMBIM1</i>   | 64114  |
| 222845_x_at  | transmembrane BAX inhibitor motif containing 4                         | <i>TMBIM4</i>   | 51643  |
| 223892_s_at  | transmembrane BAX inhibitor motif containing 4                         | <i>TMBIM4</i>   | 51643  |
| 204328_at    | transmembrane channel-like 6                                           | <i>TMC6</i>     | 11322  |
| 220021_at    | transmembrane channel-like 7                                           | <i>TMC7</i>     | 79905  |
| 213351_s_at  | transmembrane and coiled-coil domain family 1                          | <i>TMCC1</i>    | 23023  |
| 213349_at    | transmembrane and coiled-coil domain family 1                          | <i>TMCC1</i>    | 23023  |
| 226489_at    | transmembrane and coiled-coil domain family 3                          | <i>TMCC3</i>    | 57458  |
| 226050_at    | transmembrane and coiled-coil domains 3                                | <i>TMCO3</i>    | 55002  |
| 220240_s_at  | transmembrane and coiled-coil domains 3                                | <i>TMCO3</i>    | 55002  |
| 212352_s_at  | transmembrane emp24-like trafficking protein 10 (yeast)                | <i>TMED10</i>   | 10972  |
| 200929_at    | transmembrane emp24-like trafficking protein 10 (yeast)                | <i>TMED10</i>   | 10972  |
| 200087_s_at  | transmembrane emp24 domain trafficking protein 2                       | <i>TMED2</i>    | 10959  |
| 204426_at    | transmembrane emp24 domain trafficking protein 2                       | <i>TMED2</i>    | 10959  |
| 204427_s_at  | transmembrane emp24 domain trafficking protein 2                       | <i>TMED2</i>    | 10959  |
| 1558487_a_at | transmembrane emp24 protein transport domain containing 4              | <i>TMED4</i>    | 222068 |
| 224680_at    | transmembrane emp24 protein transport domain containing 4              | <i>TMED4</i>    | 222068 |
| 202194_at    | transmembrane emp24 protein transport domain containing 5              | <i>TMED5</i>    | 50999  |
| 202195_s_at  | transmembrane emp24 protein transport domain containing 5              | <i>TMED5</i>    | 50999  |
| 209404_s_at  | transmembrane emp24 protein transport domain containing 7              | <i>TMED7</i>    | 51014  |
| 214658_at    | transmembrane emp24 protein transport domain containing 7              | <i>TMED7</i>    | 51014  |
| 225343_at    | transmembrane emp24 protein transport domain containing 8              | <i>TMED8</i>    | 283578 |
| 208757_at    | transmembrane emp24 protein transport domain containing 9              | <i>TMED9</i>    | 54732  |
| 205122_at    | transmembrane protein with EGF-like and two follistatin-like domains 1 | <i>TMEFF1</i>   | 8577   |
| 233910_at    | transmembrane protein with EGF-like and two follistatin-like domains 2 | <i>TMEFF2</i>   | 23671  |
| 223557_s_at  | transmembrane protein with EGF-like and two follistatin-like domains 2 | <i>TMEFF2</i>   | 23671  |
| 238590_x_at  | transmembrane protein 107                                              | <i>TMEM107</i>  | 84314  |
| 217882_at    | transmembrane protein 111                                              | <i>TMEM111</i>  | 55831  |
| 242533_at    | Transmembrane protein 112                                              | <i>TMEM112</i>  | ---    |
| 223482_at    | transmembrane protein 120A                                             | <i>TMEM120A</i> | 83862  |
| 223334_at    | transmembrane protein 126A                                             | <i>TMEM126A</i> | 84233  |
| 222887_s_at  | transmembrane protein 127                                              | <i>TMEM127</i>  | 55654  |
| 223595_at    | transmembrane protein 133                                              | <i>TMEM133</i>  | 83935  |
| 1554866_at   | transmembrane protein 135                                              | <i>TMEM135</i>  | 65084  |
| 218999_at    | transmembrane protein 140                                              | <i>TMEM140</i>  | 55281  |
| 202475_at    | transmembrane protein 147                                              | <i>TMEM147</i>  | 10430  |
| 223133_at    | transmembrane protein 14B                                              | <i>TMEM14B</i>  | 81853  |



|              |                                                          |                 |              |
|--------------|----------------------------------------------------------|-----------------|--------------|
| 223106_at    | transmembrane protein 14C                                | <i>TMEM14C</i>  | 51522        |
| 220169_at    | transmembrane protein 156                                | <i>TMEM156</i>  | 80008        |
| 241844_x_at  | transmembrane protein 156                                | <i>TMEM156</i>  | 80008        |
| 226752_at    | transmembrane protein 157                                | <i>TMEM157</i>  | 345757       |
| 227861_at    | transmembrane protein 161B                               | <i>TMEM161B</i> | 153396       |
| 236227_at    | transmembrane protein 161B                               | <i>TMEM161B</i> | 153396       |
| 238783_at    | transmembrane protein 161B                               | <i>TMEM161B</i> | 153396       |
| 223201_s_at  | transmembrane protein 164                                | <i>TMEM164</i>  | 100130886 ,  |
| 220486_x_at  | transmembrane protein 164                                | <i>TMEM164</i>  | 100130886 ,  |
| 226276_at    | transmembrane protein 167                                | <i>TMEM167</i>  | 153339       |
| 234726_s_at  | transmembrane protein 168                                | <i>TMEM168</i>  | 64418        |
| 218962_s_at  | transmembrane protein 168                                | <i>TMEM168</i>  | 64418        |
| 225489_at    | transmembrane protein 18                                 | <i>TMEM18</i>   | 129787       |
| 225127_at    | transmembrane protein 181                                | <i>TMEM181</i>  | 57583        |
| 227880_s_at  | transmembrane protein 185A                               | <i>TMEM185A</i> | 100132969 ,  |
| 204676_at    | transmembrane protein 186                                | <i>TMEM186</i>  | 25880        |
| 223186_at    | transmembrane protein 189                                | <i>TMEM189</i>  | 387521 /// ; |
| 231012_at    | transmembrane protein 20                                 | <i>TMEM20</i>   | 159371       |
| 222391_at    | transmembrane protein 30A                                | <i>TMEM30A</i>  | 55754        |
| 213285_at    | transmembrane protein 30B                                | <i>TMEM30B</i>  | 161291       |
| 222735_at    | transmembrane protein 38B                                | <i>TMEM38B</i>  | 55151        |
| 241374_at    | transmembrane protein 39A                                | <i>TMEM39A</i>  | 55254        |
| 202857_at    | transmembrane protein 4                                  | <i>TMEM4</i>    | 10330        |
| 209797_at    | transmembrane protein 4                                  | <i>TMEM4</i>    | 10330        |
| 219503_s_at  | transmembrane protein 40                                 | <i>TMEM40</i>   | 55287        |
| 212622_at    | transmembrane protein 41B                                | <i>TMEM41B</i>  | 440026       |
| 1560275_at   | transmembrane protein 44                                 | <i>TMEM44</i>   | 93109        |
| 209656_s_at  | transmembrane protein 47                                 | <i>TMEM47</i>   | 83604        |
| 218073_s_at  | transmembrane protein 48                                 | <i>TMEM48</i>   | 55706        |
| 231697_s_at  | Transmembrane protein 49                                 | <i>TMEM49</i>   | ---          |
| 204808_s_at  | transmembrane protein 5                                  | <i>TMEM5</i>    | 10329        |
| 222401_s_at  | transmembrane protein 50A                                | <i>TMEM50A</i>  | 23585        |
| 226338_at    | transmembrane protein 55A                                | <i>TMEM55A</i>  | 55529        |
| 218562_s_at  | transmembrane protein 57                                 | <i>TMEM57</i>   | 55219        |
| 200620_at    | transmembrane protein 59                                 | <i>TMEM59</i>   | 9528         |
| 223396_at    | transmembrane protein 60                                 | <i>TMEM60</i>   | 85025        |
| 225974_at    | transmembrane protein 64                                 | <i>TMEM64</i>   | 169200       |
| 242338_at    | transmembrane protein 64                                 | <i>TMEM64</i>   | 169200       |
| 225972_at    | transmembrane protein 64                                 | <i>TMEM64</i>   | 169200       |
| 238045_at    | transmembrane protein 65                                 | <i>TMEM65</i>   | 157378       |
| 200847_s_at  | transmembrane protein 66                                 | <i>TMEM66</i>   | 51669        |
| 1563646_a_at | transmembrane protein 67                                 | <i>TMEM67</i>   | 91147        |
| 223335_at    | transmembrane protein 69                                 | <i>TMEM69</i>   | 51249        |
| 238429_at    | transmembrane protein 71                                 | <i>TMEM71</i>   | 137835       |
| 1555159_at   | Transmembrane protein 74                                 | <i>TMEM74</i>   | 157753       |
| 1552520_at   | transmembrane protein 74                                 | <i>TMEM74</i>   | 157753       |
| 225230_at    | transmembrane protein 77                                 | <i>TMEM77</i>   | 128338       |
| 221882_s_at  | transmembrane protein 8 (five membrane-spanning domains) | <i>TMEM8</i>    | 58986        |
| 229452_at    | transmembrane protein 88                                 | <i>TMEM88</i>   | 92162        |
| 229957_at    | transmembrane protein 91                                 | <i>TMEM91</i>   | 593 /// 6416 |
| 212281_s_at  | transmembrane protein 97                                 | <i>TMEM97</i>   | 27346        |
| 218065_s_at  | TMEM9 domain family, member B                            | <i>TMEM9B</i>   | 56674        |
| 214948_s_at  | TATA element modulatory factor 1                         | <i>TMF1</i>     | 7110         |
| 227685_at    | TATA element modulatory factor 1                         | <i>TMF1</i>     | 7110         |
| 213024_at    | TATA element modulatory factor 1                         | <i>TMF1</i>     | 7110         |
| 235566_at    | TATA element modulatory factor 1                         | <i>TMF1</i>     | 7110         |
| 222744_s_at  | trimethyllysine hydroxylase, epsilon                     | <i>TMLHE</i>    | 55217        |
| 219701_at    | tropomodulin 2 (neuronal)                                | <i>TMOD2</i>    | 29767        |
| 220800_s_at  | tropomodulin 3 (ubiquitous)                              | <i>TMOD3</i>    | 29766        |
| 223077_at    | tropomodulin 3 (ubiquitous)                              | <i>TMOD3</i>    | 29766        |
| 223078_s_at  | tropomodulin 3 (ubiquitous)                              | <i>TMOD3</i>    | 29766        |
| 224944_at    | thymopoietin                                             | <i>TMPO</i>     | 7112         |
| 209754_s_at  | thymopoietin                                             | <i>TMPO</i>     | 7112         |

|              |                                                                                 |                                       |        |
|--------------|---------------------------------------------------------------------------------|---------------------------------------|--------|
| 203432_at    | thymopoietin                                                                    | <i>TMPO</i>                           | 7112   |
| 1560712_at   | transmembrane protease, serine 11B                                              | <i>TMPRSS11B</i>                      | 132724 |
| 214955_at    | transmembrane protease, serine 6                                                | <i>TMPRSS6</i>                        | 164656 |
| 235775_at    | transmembrane and tetratricopeptide repeat containing 2                         | <i>TMTC2</i>                          | 160335 |
| 228574_at    | transmembrane and tetratricopeptide repeat containing 2                         | <i>TMTC2</i>                          | 160335 |
| 226604_at    | transmembrane and tetratricopeptide repeat containing 3                         | <i>TMTC3</i>                          | 160418 |
| 225666_at    | transmembrane and tetratricopeptide repeat containing 4                         | <i>TMTC4</i>                          | 84899  |
| 223153_x_at  | transmembrane and ubiquitin-like domain containing 1                            | <i>TMUB1</i>                          | 83590  |
| 218419_s_at  | transmembrane and ubiquitin-like domain containing 2                            | <i>TMUB2</i>                          | 79089  |
| 216005_at    | Tenascin C (hexabrachion)                                                       | <i>TNC</i>                            | 3371   |
| 224566_at    | trophoblast-derived noncoding RNA                                               | <i>TncRNA</i>                         | 283131 |
| 234989_at    | trophoblast-derived noncoding RNA                                               | <i>TncRNA</i>                         | 283131 |
| 224565_at    | trophoblast-derived noncoding RNA                                               | <i>TncRNA</i>                         | 283131 |
| 238320_at    | trophoblast-derived noncoding RNA                                               | <i>TncRNA</i>                         | 283131 |
| 227062_at    | trophoblast-derived noncoding RNA                                               | <i>TncRNA</i>                         | 283131 |
| 207113_s_at  | tumor necrosis factor (TNF superfamily, member 2)                               | <i>TNF</i>                            | 7124   |
| 202644_s_at  | tumor necrosis factor, alpha-induced protein 3                                  | <i>TNFAIP3</i>                        | 7128   |
| 202643_s_at  | tumor necrosis factor, alpha-induced protein 3                                  | <i>TNFAIP3</i>                        | 7128   |
| 206026_s_at  | tumor necrosis factor, alpha-induced protein 6                                  | <i>TNFAIP6</i>                        | 7130   |
| 206025_s_at  | tumor necrosis factor, alpha-induced protein 6                                  | <i>TNFAIP6</i>                        | 7130   |
| 208296_x_at  | tumor necrosis factor, alpha-induced protein 8                                  | <i>TNFAIP8</i>                        | 25816  |
| 210260_s_at  | tumor necrosis factor, alpha-induced protein 8                                  | <i>TNFAIP8</i>                        | 25816  |
| 227420_at    | tumor necrosis factor, alpha-induced protein 8-like 1                           | <i>TNFAIP8L1</i>                      | 126282 |
| 223583_at    | tumor necrosis factor, alpha-induced protein 8-like 2                           | <i>TNFAIP8L2</i>                      | 79626  |
| 231775_at    | tumor necrosis factor receptor superfamily, member 10a                          | <i>TNFRSF10A</i>                      | 8797   |
| 209295_at    | tumor necrosis factor receptor superfamily, member 10b                          | <i>TNFRSF10B</i>                      | 8795   |
| 209294_x_at  | tumor necrosis factor receptor superfamily, member 10b                          | <i>TNFRSF10B</i>                      | 8795   |
| 210405_x_at  | tumor necrosis factor receptor superfamily, member 10b                          | <i>TNFRSF10B</i>                      | 8795   |
| 211163_s_at  | tumor necrosis factor receptor superfamily, member 10c, decoy without an intr.  | <i>TNFRSF10C</i>                      | 8794   |
| 206222_at    | tumor necrosis factor receptor superfamily, member 10c, decoy without an intr.  | <i>TNFRSF10C</i>                      | 8794   |
| 227345_at    | tumor necrosis factor receptor superfamily, member 10d, decoy with truncated    | <i>TNFRSF10D</i>                      | 8793   |
| 209354_at    | tumor necrosis factor receptor superfamily, member 14 (herpesvirus entry med    | <i>TNFRSF14</i>                       | 8764   |
| 203508_at    | tumor necrosis factor receptor superfamily, member 1B                           | <i>TNFRSF1B</i>                       | 7133   |
| 206729_at    | tumor necrosis factor receptor superfamily, member 8                            | <i>TNFRSF8</i>                        | 943    |
| 207536_s_at  | tumor necrosis factor receptor superfamily, member 9                            | <i>TNFRSF9</i>                        | 3604   |
| 202687_s_at  | tumor necrosis factor (ligand) superfamily, member 10                           | <i>TNFSF10</i>                        | 8743   |
| 202688_at    | tumor necrosis factor (ligand) superfamily, member 10                           | <i>TNFSF10</i>                        | 8743   |
| 214329_x_at  | tumor necrosis factor (ligand) superfamily, member 10                           | <i>TNFSF10</i>                        | 8743   |
| 210643_at    | tumor necrosis factor (ligand) superfamily, member 11                           | <i>TNFSF11</i>                        | 8600   |
| 209500_x_at  | tumor necrosis factor (ligand) superfamily, member 13 /// tumor necrosis factor | <i>TNFSF12-TNFSF13</i> , 407977 /// § |        |
| 223502_s_at  | tumor necrosis factor (ligand) superfamily, member 13b                          | <i>TNFSF13B</i>                       | 10673  |
| 223501_at    | tumor necrosis factor (ligand) superfamily, member 13b                          | <i>TNFSF13B</i>                       | 10673  |
| 207907_at    | tumor necrosis factor (ligand) superfamily, member 14                           | <i>TNFSF14</i>                        | 8740   |
| 221085_at    | tumor necrosis factor (ligand) superfamily, member 15                           | <i>TNFSF15</i>                        | 9966   |
| 241819_at    | Tumor necrosis factor (ligand) superfamily, member 8                            | <i>TNFSF8</i>                         | 944    |
| 207196_s_at  | TNFAIP3 interacting protein 1                                                   | <i>TNIP1</i>                          | 10318  |
| 243423_at    | TNFAIP3 interacting protein 1                                                   | <i>TNIP1</i>                          | 10318  |
| 218335_x_at  | TNFAIP3 interacting protein 2                                                   | <i>TNIP2</i>                          | 79155  |
| 202561_at    | tankyrase, TRF1-interacting ankyrin-related ADP-ribose polymerase               | <i>TNKS</i>                           | 8658   |
| 218228_s_at  | tankyrase, TRF1-interacting ankyrin-related ADP-ribose polymerase 2             | <i>TNKS2</i>                          | 80351  |
| 206393_at    | troponin I type 2 (skeletal, fast)                                              | <i>TNNI2</i>                          | 7136   |
| 225765_at    | transportin 1                                                                   | <i>TNPO1</i>                          | 3842   |
| 225766_s_at  | transportin 1                                                                   | <i>TNPO1</i>                          | 3842   |
| 209225_x_at  | transportin 1                                                                   | <i>TNPO1</i>                          | 3842   |
| 209226_s_at  | transportin 1                                                                   | <i>TNPO1</i>                          | 3842   |
| 1552977_a_at | trinucleotide repeat containing 5                                               | <i>TNRC5</i>                          | 10695  |
| 224704_at    | trinucleotide repeat containing 6A                                              | <i>TNRC6A</i>                         | 27327  |
| 224705_s_at  | trinucleotide repeat containing 6A                                              | <i>TNRC6A</i>                         | 27327  |
| 240044_x_at  | Trinucleotide repeat containing 6B                                              | <i>TNRC6B</i>                         | 23112  |
| 230779_at    | trinucleotide repeat containing 6B                                              | <i>TNRC6B</i>                         | 23112  |
| 221748_s_at  | tensin 1                                                                        | <i>TNS1</i>                           | 7145   |
| 217930_s_at  | toll interacting protein                                                        | <i>TOLLIP</i>                         | 54472  |
| 202807_s_at  | target of myb1 (chicken)                                                        | <i>TOM1</i>                           | 10043  |

|              |                                                                                            |                          |                           |
|--------------|--------------------------------------------------------------------------------------------|--------------------------|---------------------------|
| 204485_s_at  | target of myb1 (chicken)-like 1                                                            | <i>TOM1L1</i>            | 10040                     |
| 212773_s_at  | translocase of outer mitochondrial membrane 20 homolog (yeast)                             | <i>TOMM20</i>            | 9804                      |
| 201519_at    | translocase of outer mitochondrial membrane 70 homolog A (S. cerevisiae)                   | <i>TOMM70A</i>           | 9868                      |
| 214299_at    | topoisomerase (DNA) III alpha                                                              | <i>TOP3A</i>             | 7156                      |
| 204946_s_at  | topoisomerase (DNA) III alpha                                                              | <i>TOP3A</i>             | 7156                      |
| 214300_s_at  | topoisomerase (DNA) III alpha                                                              | <i>TOP3A</i>             | 7156                      |
| 202633_at    | topoisomerase (DNA) II binding protein 1                                                   | <i>TOPBP1</i>            | 11073                     |
| 204071_s_at  | topoisomerase I binding, arginine/serine-rich                                              | <i>TOPORS</i>            | 10210                     |
| 209593_s_at  | torsin family 1, member B (torsin B)                                                       | <i>TOR1B</i>             | 27348                     |
| 204529_s_at  | thymocyte selection-associated high mobility group box                                     | <i>TOX</i>               | 9760                      |
| 204530_s_at  | thymocyte selection-associated high mobility group box                                     | <i>TOX</i>               | 9760                      |
| 228737_at    | TOX high mobility group box family member 2                                                | <i>TOX2</i>              | 84969                     |
| 201683_x_at  | TOX high mobility group box family member 4                                                | <i>TOX4</i>              | 9878                      |
| 232097_at    | TOX high mobility group box family member 4                                                | <i>TOX4</i>              | 9878                      |
| 210886_x_at  | TP53 activated protein 1                                                                   | <i>TP53AP1</i>           | 11257                     |
| 203050_at    | tumor protein p53 binding protein 1                                                        | <i>TP53BP1</i>           | 7158                      |
| 244721_at    | tumor protein p53 inducible nuclear protein 1                                              | <i>TP53INP1</i>          | 94241                     |
| 224836_at    | tumor protein p53 inducible nuclear protein 2                                              | <i>TP53INP2</i>          | 58476                     |
| 209863_s_at  | tumor protein p63                                                                          | <i>TP63</i>              | 8626                      |
| 203476_at    | trophoblast glycoprotein                                                                   | <i>TPBG</i>              | 7162                      |
| 201689_s_at  | tumor protein D52                                                                          | <i>TPD52</i>             | 7163                      |
| 201690_s_at  | tumor protein D52                                                                          | <i>TPD52</i>             | 7163                      |
| 201379_s_at  | tumor protein D52-like 2                                                                   | <i>TPD52L2</i>           | 7165                      |
| 1553859_at   | tryptophan hydroxylase 1 (tryptophan 5-monooxygenase)                                      | <i>TPH1</i>              | 7166                      |
| 200822_x_at  | triosephosphate isomerase 1                                                                | <i>TPI1</i>              | 7167                      |
| 213011_s_at  | triosephosphate isomerase 1                                                                | <i>TPI1</i>              | 7167                      |
| 210050_at    | triosephosphate isomerase 1                                                                | <i>TPI1</i>              | 7167                      |
| 210986_s_at  | tropomyosin 1 (alpha)                                                                      | <i>TPM1</i>              | 7168                      |
| 224164_at    | tropomyosin 3                                                                              | <i>TPM3</i>              | 7170                      |
| 212481_s_at  | tropomyosin 4                                                                              | <i>TPM4</i>              | 7171                      |
| 1567107_s_at | tropomyosin 4                                                                              | <i>TPM4</i>              | 7171                      |
| 200743_s_at  | tripeptidyl peptidase I                                                                    | <i>TPP1</i>              | 1200                      |
| 214196_s_at  | tripeptidyl peptidase I                                                                    | <i>TPP1</i>              | 1200                      |
| 200742_s_at  | tripeptidyl peptidase I                                                                    | <i>TPP1</i>              | 1200                      |
| 214195_at    | tripeptidyl peptidase I                                                                    | <i>TPP1</i>              | 1200                      |
| 203375_s_at  | tripeptidyl peptidase II                                                                   | <i>TPP2</i>              | 7174                      |
| 1557227_s_at | translocated promoter region (to activated MET oncogene)                                   | <i>TPR</i>               | 7175                      |
| 201730_s_at  | translocated promoter region (to activated MET oncogene)                                   | <i>TPR</i>               | 7175                      |
| 204140_at    | tyrosylprotein sulfotransferase 1                                                          | <i>TPST1</i>             | 8460                      |
| 1556876_s_at | TPE pseudogene 1                                                                           | <i>TPTEps1</i>           | 440140                    |
| 211902_x_at  | T cell receptor alpha locus                                                                | <i>TRA@</i>              | 6955                      |
| 216540_at    | T cell receptor alpha locus                                                                | <i>TRA@</i>              | 6955                      |
| 210972_x_at  | T cell receptor alpha locus /// T cell receptor delta variable 2 /// T cell receptor delta | <i>TRA@ /// TRAC ///</i> | 28663 /// 28663 /// 28663 |
| 215524_x_at  | T cell receptor alpha locus /// YME1-like 1 (S. cerevisiae) /// T cell receptor delta      | <i>TRA@ /// TRAC ///</i> | 28663 /// 28663 /// 28663 |
| 217143_s_at  | T cell receptor alpha locus /// T cell receptor delta locus                                | <i>TRA@ /// TRD@</i>     | 6955 /// 6955             |
| 213593_s_at  | transformer-2 alpha                                                                        | <i>TRA2A</i>             | 29896                     |
| 229574_at    | transformer-2 alpha                                                                        | <i>TRA2A</i>             | 29896                     |
| 213575_at    | transformer-2 alpha                                                                        | <i>TRA2A</i>             | 29896                     |
| 209670_at    | T cell receptor alpha constant                                                             | <i>TRAC</i>              | 28755                     |
| 205641_s_at  | TNFRSF1A-associated via death domain                                                       | <i>TRADD</i>             | 8717                      |
| 205599_at    | TNF receptor-associated factor 1                                                           | <i>TRAF1</i>             | 7185                      |
| 235116_at    | TNF receptor-associated factor 1                                                           | <i>TRAF1</i>             | 7185                      |
| 221571_at    | TNF receptor-associated factor 3                                                           | <i>TRAF3</i>             | 7187                      |
| 208315_x_at  | TNF receptor-associated factor 3                                                           | <i>TRAF3</i>             | 7187                      |
| 238494_at    | TNF receptor-associated factor 3 interacting protein 1                                     | <i>TRAF3IP1</i>          | 26146                     |
| 215411_s_at  | TRAF3 interacting protein 2                                                                | <i>TRAF3IP2</i>          | 10758                     |
| 205558_at    | TNF receptor-associated factor 6                                                           | <i>TRAF6</i>             | 7189                      |
| 223029_s_at  | TNF receptor-associated factor 7                                                           | <i>TRAF7</i>             | 84231                     |
| 202080_s_at  | trafficking protein, kinesin binding 1                                                     | <i>TRAK1</i>             | 22906                     |
| 202124_s_at  | trafficking protein, kinesin binding 2                                                     | <i>TRAK2</i>             | 66008                     |
| 201399_s_at  | translocation associated membrane protein 1                                                | <i>TRAM1</i>             | 23471                     |
| 202369_s_at  | translocation associated membrane protein 2                                                | <i>TRAM2</i>             | 9697                      |
| 203511_s_at  | trafficking protein particle complex 3                                                     | <i>TRAPPC3</i>           | 27095                     |

|              |                                                                                       |                                |              |
|--------------|---------------------------------------------------------------------------------------|--------------------------------|--------------|
| 217958_at    | trafficking protein particle complex 4                                                | TRAPPC4                        | 51399        |
| 217147_s_at  | T cell receptor associated transmembrane adaptor 1                                    | TRAT1                          | 50852        |
| 210915_x_at  | T cell receptor beta variable 19 /// T cell receptor beta constant 1                  | TRBC1 /// TRBV19               | 28639        |
| 213193_x_at  | T cell receptor beta variable 19 /// T cell receptor beta constant 1                  | TRBC1 /// TRBV19               | 28639        |
| 211796_s_at  | T cell receptor beta variable 19 /// T cell receptor beta variable 7-2 /// T cell rec | TRBC1 /// TRBV19, 28568 /// 28 |              |
| 1552791_a_at | triadin                                                                               | TRDN                           | 10345        |
| 219434_at    | triggering receptor expressed on myeloid cells 1                                      | TREM1                          | 54210        |
| 1567559_s_at | triggering receptor expressed on myeloid cells-like 4 /// triggering receptor expr    | TREML3 /// TREML               | 285852 /// 3 |
| 238520_at    | transcriptional regulating factor 1                                                   | TRERF1                         | 55809        |
| 229016_s_at  | transcriptional regulating factor 1                                                   | TRERF1                         | 55809        |
| 34689_at     | three prime repair exonuclease 1                                                      | TREX1                          | 11277 /// 84 |
| 218426_s_at  | TRIAD3 protein                                                                        | TRIAD3                         | 54476        |
| 227065_at    | TRIAD3 protein                                                                        | TRIAD3                         | 54476        |
| 218425_at    | TRIAD3 protein                                                                        | TRIAD3                         | 54476        |
| 218403_at    | TP53 regulated inhibitor of apoptosis 1                                               | TRIAP1                         | 51499        |
| 239818_x_at  | tribbles homolog 1 (Drosophila)                                                       | TRIB1                          | 10221        |
| 202241_at    | tribbles homolog 1 (Drosophila)                                                       | TRIB1                          | 10221        |
| 202478_at    | tribbles homolog 2 (Drosophila)                                                       | TRIB2                          | 28951        |
| 226566_at    | tripartite motif-containing 11                                                        | TRIM11                         | 81559        |
| 203148_s_at  | tripartite motif-containing 14                                                        | TRIM14                         | 9830         |
| 203147_s_at  | tripartite motif-containing 14                                                        | TRIM14                         | 9830         |
| 36742_at     | tripartite motif-containing 15                                                        | TRIM15                         | 89870        |
| 1559682_at   | Tripartite motif-containing 16-like                                                   | TRIM16L                        | 147166       |
| 204804_at    | tripartite motif-containing 21                                                        | TRIM21                         | 6737         |
| 213293_s_at  | tripartite motif-containing 22                                                        | TRIM22                         | 10346        |
| 210994_x_at  | tripartite motif-containing 23                                                        | TRIM23                         | 373          |
| 224806_at    | tripartite motif-containing 25                                                        | TRIM25                         | 7706         |
| 242812_at    | Tripartite motif-containing 26                                                        | TRIM26                         | 7726         |
| 212118_at    | tripartite motif-containing 27                                                        | TRIM27                         | 5987         |
| 212116_at    | tripartite motif-containing 27                                                        | TRIM27                         | 5987         |
| 210541_s_at  | tripartite motif-containing 27                                                        | TRIM27                         | 5987         |
| 200990_at    | tripartite motif-containing 28                                                        | TRIM28                         | 10155        |
| 213885_at    | tripartite motif-containing 3                                                         | TRIM3                          | 10612        |
| 212436_at    | tripartite motif-containing 33                                                        | TRIM33                         | 51592        |
| 210266_s_at  | tripartite motif-containing 33                                                        | TRIM33                         | 51592        |
| 214815_at    | Tripartite motif-containing 33                                                        | TRIM33                         | 51592        |
| 219736_at    | tripartite motif-containing 36                                                        | TRIM36                         | 55521        |
| 224159_x_at  | tripartite motif-containing 4                                                         | TRIM4                          | 89122        |
| 217759_at    | tripartite motif-containing 44                                                        | TRIM44                         | 54765        |
| 217760_at    | tripartite motif-containing 44                                                        | TRIM44                         | 54765        |
| 220534_at    | tripartite motif-containing 48                                                        | TRIM48                         | 79097        |
| 210705_s_at  | tripartite motif-containing 5                                                         | TRIM5                          | 85363        |
| 227801_at    | tripartite motif-containing 59                                                        | TRIM59                         | 286827       |
| 223599_at    | tripartite motif-containing 6                                                         | TRIM6                          | 117854       |
| 213748_at    | tripartite motif-containing 66                                                        | TRIM66                         | 9866         |
| 219405_at    | tripartite motif-containing 68                                                        | TRIM68                         | 55128        |
| 1554250_s_at | tripartite motif-containing 73                                                        | TRIM73                         | 375593       |
| 223132_s_at  | tripartite motif-containing 8                                                         | TRIM8                          | 81603        |
| 232464_at    | tripartite motif-containing pseudogene 1                                              | TRIMP1                         | 117852       |
| 243690_at    | TRIO and F-actin binding protein                                                      | TRIOBP                         | 11078        |
| 202734_at    | thyroid hormone receptor interactor 10                                                | TRIP10                         | 9322         |
| 201546_at    | thyroid hormone receptor interactor 12                                                | TRIP12                         | 9320         |
| 218877_s_at  | tRNA methyltransferase 11 homolog (S. cerevisiae)                                     | TRMT11                         | 60487        |
| 210438_x_at  | TROVE domain family, member 2                                                         | TROVE2                         | 6738         |
| 212852_s_at  | TROVE domain family, member 2                                                         | TROVE2                         | 6738         |
| 207520_at    | TROVE domain family, member 2                                                         | TROVE2                         | 6738         |
| 206425_s_at  | transient receptor potential cation channel, subfamily C, member 3                    | TRPC3                          | 7222         |
| 212059_s_at  | transient receptor potential cation channel, subfamily C, member 4 associated p       | TRPC4AP                        | 26133        |
| 217287_s_at  | transient receptor potential cation channel, subfamily C, member 6                    | TRPC6                          | 7225         |
| 240386_at    | Transient receptor potential cation channel, subfamily M, member 1                    | TRPM1                          | 4308         |
| 205708_s_at  | transient receptor potential cation channel, subfamily M, member 2                    | TRPM2                          | 7226         |
| 224412_s_at  | transient receptor potential cation channel, subfamily M, member 6                    | TRPM6                          | 140803       |
| 223324_s_at  | transient receptor potential cation channel, subfamily M, member 7                    | TRPM7                          | 54822        |

|              |                                                                                     |                               |              |
|--------------|-------------------------------------------------------------------------------------|-------------------------------|--------------|
| 218502_s_at  | trichorhinophalangeal syndrome I                                                    | <i>TRPS1</i>                  | 7227         |
| 224218_s_at  | trichorhinophalangeal syndrome I                                                    | <i>TRPS1</i>                  | 7227         |
| 222651_s_at  | trichorhinophalangeal syndrome I                                                    | <i>TRPS1</i>                  | 7227         |
| 223436_s_at  | tRNA phosphotransferase 1                                                           | <i>TRPT1</i>                  | 83707        |
| 1555042_at   | transient receptor potential cation channel, subfamily V, member 5                  | <i>TRPV5</i>                  | 56302        |
| 218977_s_at  | tRNA selenocysteine associated protein 1                                            | <i>TRSPAP1</i>                | 54952        |
| 215735_s_at  | tuberous sclerosis 2                                                                | <i>TSC2</i>                   | 7249         |
| 235315_at    | TSC22 domain family, member 1                                                       | <i>TSC22D1</i>                | 8848         |
| 204094_s_at  | TSC22 domain family, member 2                                                       | <i>TSC22D2</i>                | 9819         |
| 208763_s_at  | TSC22 domain family, member 3                                                       | <i>TSC22D3</i>                | 1831         |
| 207001_x_at  | TSC22 domain family, member 3                                                       | <i>TSC22D3</i>                | 1831         |
| 201758_at    | tumor susceptibility gene 101                                                       | <i>TSG101</i>                 | 7251         |
| 223838_at    | testis specific, 10                                                                 | <i>TSGA10</i>                 | 80705        |
| 214529_at    | thyroid stimulating hormone, beta                                                   | <i>TSHB</i>                   | 7252         |
| 223282_at    | teashirt zinc finger homeobox 1                                                     | <i>TSHZ1</i>                  | 10194        |
| 235815_at    | teashirt zinc finger homeobox 2                                                     | <i>TSHZ2</i>                  | 128553       |
| 201513_at    | translin                                                                            | <i>TSN</i>                    | 7247         |
| 203983_at    | translin-associated factor X                                                        | <i>TSNAX</i>                  | 7257         |
| 221002_s_at  | tetraspanin 14                                                                      | <i>TSPAN14</i>                | 81619        |
| 227236_at    | tetraspanin 2                                                                       | <i>TSPAN2</i>                 | 10100        |
| 214606_at    | tetraspanin 2                                                                       | <i>TSPAN2</i>                 | 10100        |
| 200973_s_at  | tetraspanin 3                                                                       | <i>TSPAN3</i>                 | 10099        |
| 220558_x_at  | tetraspanin 32                                                                      | <i>TSPAN32</i>                | 10077        |
| 233467_s_at  | tetraspanin 32                                                                      | <i>TSPAN32</i>                | 10077        |
| 212928_at    | TSPY-like 4                                                                         | <i>TSPYL4</i>                 | 23270        |
| 209605_at    | thiosulfate sulfurtransferase (rhodanese)                                           | <i>TST</i>                    | 7263         |
| 213922_at    | tau tubulin kinase 2                                                                | <i>TTBK2</i>                  | 146057       |
| 201434_at    | tetratricopeptide repeat domain 1                                                   | <i>TTC1</i>                   | 7265         |
| 219481_at    | tetratricopeptide repeat domain 13                                                  | <i>TTC13</i>                  | 79573        |
| 225178_at    | tetratricopeptide repeat domain 14                                                  | <i>TTC14</i>                  | 151613       |
| 224852_at    | tetratricopeptide repeat domain 17                                                  | <i>TTC17</i>                  | 55761        |
| 232323_s_at  | tetratricopeptide repeat domain 17                                                  | <i>TTC17</i>                  | 55761        |
| 224849_at    | tetratricopeptide repeat domain 17                                                  | <i>TTC17</i>                  | 55761        |
| 240716_at    | tetratricopeptide repeat domain 23                                                  | <i>TTC23</i>                  | 64927        |
| 1554672_at   | tetratricopeptide repeat domain 26                                                  | <i>TTC26</i>                  | 79989        |
| 1554588_a_at | tetratricopeptide repeat domain 30B                                                 | <i>TTC30B</i>                 | 150737       |
| 218838_s_at  | tetratricopeptide repeat domain 31                                                  | <i>TTC31</i>                  | 64427        |
| 203584_at    | tetratricopeptide repeat domain 35                                                  | <i>TTC35</i>                  | 9694         |
| 226152_at    | tetratricopeptide repeat domain 7B                                                  | <i>TTC7B</i>                  | 145567       |
| 226120_at    | tetratricopeptide repeat domain 8                                                   | <i>TTC8</i>                   | 123016       |
| 1569189_at   | tetratricopeptide repeat domain 9C                                                  | <i>TTC9C</i>                  | 283237       |
| 204772_s_at  | transcription termination factor, RNA polymerase I                                  | <i>TTF1</i>                   | 7270         |
| 204407_at    | transcription termination factor, RNA polymerase II                                 | <i>TTF2</i>                   | 8458         |
| 204822_at    | TTK protein kinase                                                                  | <i>TTK</i>                    | 7272         |
| 216251_s_at  | tubulin tyrosine ligase-like family, member 12                                      | <i>TLL12</i>                  | 23170        |
| 210129_s_at  | tubulin tyrosine ligase-like family, member 3                                       | <i>TLL3</i>                   | 26140        |
| 203702_s_at  | tubulin tyrosine ligase-like family, member 4                                       | <i>TLL4</i>                   | 9654         |
| 215898_at    | tubulin tyrosine ligase-like family, member 5                                       | <i>TLL5</i>                   | 23093        |
| 208099_x_at  | tubulin tyrosine ligase-like family, member 5                                       | <i>TLL5</i>                   | 23093        |
| 214672_at    | tubulin tyrosine ligase-like family, member 5                                       | <i>TLL5</i>                   | 23093        |
| 240793_at    | Titin                                                                               | <i>TTN</i>                    | 7273         |
| 210614_at    | tocopherol (alpha) transfer protein                                                 | <i>TTPA</i>                   | 7274         |
| 202266_at    | TRAF and TNF receptor associated protein                                            | <i>TTRAP</i>                  | 51567        |
| 211460_at    | testis-specific transcript, Y-linked 9A /// testis-specific transcript, Y-linked 9B | <i>TTY9A</i> /// <i>TTY9B</i> | 425057 /// { |
| 209118_s_at  | tubulin, alpha 1a                                                                   | <i>TUBA1A</i>                 | 7846         |
| 201090_x_at  | tubulin, alpha 1b                                                                   | <i>TUBA1B</i>                 | 10376        |
| 212639_x_at  | tubulin, alpha 1b                                                                   | <i>TUBA1B</i>                 | 10376        |
| 213646_x_at  | tubulin, alpha 1b                                                                   | <i>TUBA1B</i>                 | 10376        |
| 211072_x_at  | tubulin, alpha 1b                                                                   | <i>TUBA1B</i>                 | 10376        |
| 211750_x_at  | tubulin, alpha 1c                                                                   | <i>TUBA1C</i>                 | 84790        |
| 212242_at    | tubulin, alpha 4a                                                                   | <i>TUBA4A</i>                 | 7277         |
| 221326_s_at  | tubulin, delta 1                                                                    | <i>TUBD1</i>                  | 51174        |
| 230891_at    | Tubulin, epsilon 1                                                                  | <i>TUBE1</i>                  | 51175        |

|              |                                                                               |                                |              |
|--------------|-------------------------------------------------------------------------------|--------------------------------|--------------|
| 203690_at    | tubulin, gamma complex associated protein 3                                   | <i>TUBGCP3</i>                 | 10426        |
| 215739_s_at  | tubulin, gamma complex associated protein 3                                   | <i>TUBGCP3</i>                 | 10426        |
| 1554086_at   | tubulin, gamma complex associated protein 3                                   | <i>TUBGCP3</i>                 | 10426        |
| 225758_s_at  | tubulin, gamma complex associated protein 6                                   | <i>TUBGCP6</i>                 | 85378        |
| 222244_s_at  | taurine upregulated gene 1                                                    | <i>TUG1</i>                    | 55000        |
| 203246_s_at  | tumor suppressor candidate 4                                                  | <i>TUSC4</i>                   | 10641        |
| 214729_at    | TWIST neighbor                                                                | <i>TWISTNB</i>                 | 221830       |
| 225406_at    | twisted gastrulation homolog 1 (Drosophila)                                   | <i>TWSG1</i>                   | 57045        |
| 219201_s_at  | twisted gastrulation homolog 1 (Drosophila)                                   | <i>TWSG1</i>                   | 57045        |
| 206828_at    | TXK tyrosine kinase                                                           | <i>TXK</i>                     | 7294         |
| 208097_s_at  | thioredoxin domain containing 1                                               | <i>TXNDC1</i>                  | 81542        |
| 225302_at    | thioredoxin domain containing 10                                              | <i>TXNDC10</i>                 | 54495        |
| 223325_at    | thioredoxin domain containing 11                                              | <i>TXNDC11</i>                 | 51061        |
| 223017_at    | thioredoxin domain containing 12 (endoplasmic reticulum)                      | <i>TXNDC12</i>                 | 51060        |
| 201581_at    | thioredoxin domain containing 13                                              | <i>TXNDC13</i>                 | 56255        |
| 201580_s_at  | thioredoxin domain containing 13                                              | <i>TXNDC13</i>                 | 56255        |
| 227873_at    | thioredoxin domain containing 15                                              | <i>TXNDC15</i>                 | 79770        |
| 208959_s_at  | thioredoxin domain containing 4 (endoplasmic reticulum)                       | <i>TXNDC4</i>                  | 23071        |
| 221253_s_at  | thioredoxin domain containing 5                                               | <i>TXNDC5</i>                  | 63915 /// 8: |
| 1564386_at   | thioredoxin domain containing 8 (spermatozoa)                                 | <i>TXNDC8</i>                  | 255220       |
| 201008_s_at  | thioredoxin interacting protein                                               | <i>TXNIP</i>                   | 10628        |
| 201009_s_at  | thioredoxin interacting protein                                               | <i>TXNIP</i>                   | 10628        |
| 201588_at    | thioredoxin-like 1                                                            | <i>TXNL1</i>                   | 9352         |
| 1554696_s_at | thymidylate synthetase                                                        | <i>TYMS</i>                    | 7298         |
| 202589_at    | thymidylate synthetase                                                        | <i>TYMS</i>                    | 7298         |
| 205694_at    | tyrosinase-related protein 1                                                  | <i>TYRP1</i>                   | 7306         |
| 231904_at    | U2 small nuclear RNA auxiliary factor 1                                       | <i>U2AF1</i>                   | 7307         |
| 232141_at    | U2 small nuclear RNA auxiliary factor 1                                       | <i>U2AF1</i>                   | 7307         |
| 218381_s_at  | U2 small nuclear RNA auxiliary factor 2                                       | <i>U2AF2</i>                   | 11338        |
| 1558356_at   | uveal autoantigen with coiled-coil domains and ankyrin repeats                | <i>UACA</i>                    | 55075        |
| 236715_x_at  | uveal autoantigen with coiled-coil domains and ankyrin repeats                | <i>UACA</i>                    | 55075        |
| 209340_at    | UDP-N-acetylglucosamine pyrophosphorylase 1                                   | <i>UAP1</i>                    | 6675         |
| 221700_s_at  | ubiquitin A-52 residue ribosomal protein fusion product 1                     | <i>UBA52</i>                   | 7311         |
| 202151_s_at  | UBA domain containing 1                                                       | <i>UBAC1</i>                   | 10422        |
| 224298_s_at  | UBA domain containing 2                                                       | <i>UBAC2</i>                   | 337867       |
| 46270_at     | ubiquitin associated protein 1                                                | <i>UBAP1</i>                   | 51271        |
| 221490_at    | ubiquitin associated protein 1                                                | <i>UBAP1</i>                   | 51271        |
| 221839_s_at  | ubiquitin associated protein 2                                                | <i>UBAP2</i>                   | 55833        |
| 219192_at    | ubiquitin associated protein 2                                                | <i>UBAP2</i>                   | 55833        |
| 201378_s_at  | ubiquitin associated protein 2-like                                           | <i>UBAP2L</i>                  | 9898         |
| 201377_at    | ubiquitin associated protein 2-like                                           | <i>UBAP2L</i>                  | 9898         |
| 208980_s_at  | ubiquitin C                                                                   | <i>UBC</i>                     | 6233 /// 73: |
| 200964_at    | ubiquitin-activating enzyme E1                                                | <i>UBE1</i>                    | 7317         |
| 1294_at      | ubiquitin-activating enzyme E1-like                                           | <i>UBE1L</i>                   | 7318         |
| 203281_s_at  | ubiquitin-activating enzyme E1-like                                           | <i>UBE1L</i>                   | 7318         |
| 220869_at    | ubiquitin-activating enzyme E1-like 2                                         | <i>UBE1L2</i>                  | 55236        |
| 201898_s_at  | ubiquitin-conjugating enzyme E2A (RAD6 homolog)                               | <i>UBE2A</i>                   | 7319         |
| 211763_s_at  | ubiquitin-conjugating enzyme E2B (RAD6 homolog)                               | <i>UBE2B</i>                   | 7320         |
| 202334_s_at  | ubiquitin-conjugating enzyme E2B (RAD6 homolog)                               | <i>UBE2B</i>                   | 7320         |
| 239163_at    | ubiquitin-conjugating enzyme E2B (RAD6 homolog)                               | <i>UBE2B</i>                   | 7320         |
| 202333_s_at  | ubiquitin-conjugating enzyme E2B (RAD6 homolog)                               | <i>UBE2B</i>                   | 7320         |
| 214590_s_at  | ubiquitin-conjugating enzyme E2D 1 (UBC4/5 homolog, yeast)                    | <i>UBE2D1</i>                  | 7321         |
| 201345_s_at  | ubiquitin-conjugating enzyme E2D 2 (UBC4/5 homolog, yeast)                    | <i>UBE2D2</i>                  | 7322         |
| 200667_at    | ubiquitin-conjugating enzyme E2D 2 (UBC4/5 homolog, yeast) /// ubiquitin-conj | <i>UBE2D2</i> /// <i>UBE2D</i> | 7323         |
| 200668_s_at  | ubiquitin-conjugating enzyme E2D 2 (UBC4/5 homolog, yeast) /// ubiquitin-conj | <i>UBE2D2</i> /// <i>UBE2D</i> | 7323         |
| 200669_s_at  | ubiquitin-conjugating enzyme E2D 2 (UBC4/5 homolog, yeast) /// ubiquitin-conj | <i>UBE2D2</i> /// <i>UBE2D</i> | 7323         |
| 240383_at    | ubiquitin-conjugating enzyme E2D 3 (UBC4/5 homolog, yeast)                    | <i>UBE2D3</i>                  | 7323         |
| 65521_at     | ubiquitin-conjugating enzyme E2D 4 (putative)                                 | <i>UBE2D4</i>                  | 51619        |
| 212519_at    | ubiquitin-conjugating enzyme E2E 1 (UBC4/5 homolog, yeast)                    | <i>UBE2E1</i>                  | 7324         |
| 210024_s_at  | ubiquitin-conjugating enzyme E2E 3 (UBC4/5 homolog, yeast)                    | <i>UBE2E3</i>                  | 10477        |
| 231948_s_at  | ubiquitin-conjugating enzyme E2F (putative)                                   | <i>UBE2F</i>                   | 140739       |
| 225783_at    | ubiquitin-conjugating enzyme E2F (putative)                                   | <i>UBE2F</i>                   | 140739       |
| 225787_at    | ubiquitin-conjugating enzyme E2F (putative)                                   | <i>UBE2F</i>                   | 140739       |

|             |                                                                                |                |              |
|-------------|--------------------------------------------------------------------------------|----------------|--------------|
| 225791_at   | ubiquitin-conjugating enzyme E2F (putative)                                    | <i>UBE2F</i>   | 140739       |
| 209142_s_at | ubiquitin-conjugating enzyme E2G 1 (UBC7 homolog, yeast)                       | <i>UBE2G1</i>  | 7326         |
| 209042_s_at | ubiquitin-conjugating enzyme E2G 2 (UBC7 homolog, yeast)                       | <i>UBE2G2</i>  | 7327         |
| 221962_s_at | ubiquitin-conjugating enzyme E2H (UBC8 homolog, yeast)                         | <i>UBE2H</i>   | 7328         |
| 222420_s_at | ubiquitin-conjugating enzyme E2H (UBC8 homolog, yeast)                         | <i>UBE2H</i>   | 7328         |
| 222421_at   | ubiquitin-conjugating enzyme E2H (UBC8 homolog, yeast)                         | <i>UBE2H</i>   | 7328         |
| 217799_x_at | ubiquitin-conjugating enzyme E2H (UBC8 homolog, yeast)                         | <i>UBE2H</i>   | 7328         |
| 213535_s_at | ubiquitin-conjugating enzyme E2I (UBC9 homolog, yeast)                         | <i>UBE2I</i>   | 7329         |
| 208760_at   | Ubiquitin-conjugating enzyme E2I (UBC9 homolog, yeast)                         | <i>UBE2I</i>   | 7329         |
| 217826_s_at | ubiquitin-conjugating enzyme E2, J1 (UBC6 homolog, yeast)                      | <i>UBE2J1</i>  | 51465        |
| 217823_s_at | ubiquitin-conjugating enzyme E2, J1 (UBC6 homolog, yeast)                      | <i>UBE2J1</i>  | 51465        |
| 222435_s_at | ubiquitin-conjugating enzyme E2, J1 (UBC6 homolog, yeast)                      | <i>UBE2J1</i>  | 51465        |
| 201649_at   | ubiquitin-conjugating enzyme E2L 6                                             | <i>UBE2L6</i>  | 9246         |
| 203109_at   | ubiquitin-conjugating enzyme E2M (UBC12 homolog, yeast)                        | <i>UBE2M</i>   | 9040         |
| 201523_x_at | ubiquitin-conjugating enzyme E2N (UBC13 homolog, yeast)                        | <i>UBE2N</i>   | 7334         |
| 217978_s_at | ubiquitin-conjugating enzyme E2Q (putative) 1                                  | <i>UBE2Q1</i>  | 55585        |
| 224747_at   | ubiquitin-conjugating enzyme E2Q (putative) 2                                  | <i>UBE2Q2</i>  | 92912        |
| 226954_at   | ubiquitin-conjugating enzyme E2R 2                                             | <i>UBE2R2</i>  | 54926        |
| 223014_at   | ubiquitin-conjugating enzyme E2R 2                                             | <i>UBE2R2</i>  | 54926        |
| 209096_at   | ubiquitin-conjugating enzyme E2 variant 2                                      | <i>UBE2V2</i>  | 7336         |
| 222657_s_at | ubiquitin-conjugating enzyme E2W (putative)                                    | <i>UBE2W</i>   | 55284        |
| 236107_at   | ubiquitin-conjugating enzyme E2Z                                               | <i>UBE2Z</i>   | 65264        |
| 211575_s_at | ubiquitin protein ligase E3A (human papilloma virus E6-associated protein, Ang | <i>UBE3A</i>   | 7337         |
| 213128_s_at | ubiquitin protein ligase E3A (human papilloma virus E6-associated protein, Ang | <i>UBE3A</i>   | 7337         |
| 213822_s_at | ubiquitin protein ligase E3B                                                   | <i>UBE3B</i>   | 89910        |
| 202038_at   | ubiquitination factor E4A (UFD2 homolog, yeast)                                | <i>UBE4A</i>   | 9354         |
| 202317_s_at | ubiquitination factor E4B (UFD2 homolog, yeast)                                | <i>UBE4B</i>   | 10277        |
| 202316_x_at | ubiquitination factor E4B (UFD2 homolog, yeast)                                | <i>UBE4B</i>   | 10277        |
| 224878_at   | ubiquitin family domain containing 1                                           | <i>UBFD1</i>   | 56061        |
| 201534_s_at | ubiquitin-like 3                                                               | <i>UBL3</i>    | 5412         |
| 218011_at   | ubiquitin-like 5                                                               | <i>UBL5</i>    | 59286        |
| 225063_at   | ubiquitin-like 7 (bone marrow stromal cell-derived)                            | <i>UBL7</i>    | 84993        |
| 243916_x_at | ubiquitin-like domain containing CTD phosphatase 1                             | <i>UBLCP1</i>  | 134510       |
| 227413_at   | ubiquitin-like domain containing CTD phosphatase 1                             | <i>UBLCP1</i>  | 134510       |
| 207253_s_at | ubinnuclein 1                                                                  | <i>UBN1</i>    | 29855        |
| 209088_s_at | ubinnuclein 1                                                                  | <i>UBN1</i>    | 29855        |
| 218082_s_at | upstream binding protein 1 (LBP-1a)                                            | <i>UBP1</i>    | 7342         |
| 222990_at   | ubiquilin 1                                                                    | <i>UBQLN1</i>  | 29979        |
| 222991_s_at | ubiquilin 1                                                                    | <i>UBQLN1</i>  | 29979        |
| 222989_s_at | ubiquilin 1                                                                    | <i>UBQLN1</i>  | 29979        |
| 222252_x_at | ubiquilin 4                                                                    | <i>UBQLN4</i>  | 56893        |
| 212760_at   | ubiquitin protein ligase E3 component n-recogin 2                              | <i>UBR2</i>    | 23304        |
| 211950_at   | ubiquitin protein ligase E3 component n-recogin 4                              | <i>UBR4</i>    | 23352        |
| 1555888_at  | Ubiquitin protein ligase E3 component n-recogin 5                              | <i>UBR5</i>    | 51366        |
| 225982_at   | upstream binding transcription factor, RNA polymerase I                        | <i>UBTF</i>    | 7343         |
| 223012_at   | UBX domain containing 1                                                        | <i>UBXD1</i>   | 80700        |
| 212006_at   | UBX domain containing 2                                                        | <i>UBXD2</i>   | 23190        |
| 212007_at   | UBX domain containing 2                                                        | <i>UBXD2</i>   | 23190        |
| 212008_at   | UBX domain containing 2                                                        | <i>UBXD2</i>   | 23190        |
| 212108_at   | UBX domain containing 8                                                        | <i>UBXD8</i>   | 23197        |
| 213334_x_at | UCHL5 interacting protein                                                      | <i>UCHL5IP</i> | 11219 /// 5' |
| 208998_at   | uncoupling protein 2 (mitochondrial, proton carrier)                           | <i>UCP2</i>    | 7351         |
| 209103_s_at | ubiquitin fusion degradation 1 like (yeast)                                    | <i>UFD1L</i>   | 7353         |
| 232180_at   | UDP-glucose pyrophosphorylase 2                                                | <i>UGP2</i>    | 7360         |
| 205480_s_at | UDP-glucose pyrophosphorylase 2                                                | <i>UGP2</i>    | 7360         |
| 204532_x_at | UDP glucuronosyltransferase 1 family, polypeptide A4                           | <i>UGT1A4</i>  | 54575 /// 5' |
| 207126_x_at | UDP glucuronosyltransferase 1 family, polypeptide A4                           | <i>UGT1A4</i>  | 54575 /// 5' |
| 228956_at   | UDP glycosyltransferase 8 (UDP-galactose ceramide galactosyltransferase)       | <i>UGT8</i>    | 7368         |
| 220746_s_at | ubiquitin interaction motif containing 1                                       | <i>UIMC1</i>   | 51720        |
| 209333_at   | unc-51-like kinase 1 (C. elegans)                                              | <i>ULK1</i>    | 8408         |
| 231149_s_at | unc-51-like kinase 4 (C. elegans)                                              | <i>ULK4</i>    | 54986        |
| 202706_s_at | uridine monophosphate synthetase (orotate phosphoribosyl transferase and or    | <i>UMPS</i>    | 7372         |
| 203271_s_at | unc-119 homolog (C. elegans)                                                   | <i>UNC119</i>  | 9094         |

|              |                                                                        |                |             |
|--------------|------------------------------------------------------------------------|----------------|-------------|
| 202365_at    | unc-119 homolog B (C. elegans)                                         | <i>UNC119B</i> | 84747       |
| 41856_at     | unc-5 homolog B (C. elegans)                                           | <i>UNC5B</i>   | ---         |
| 240958_at    | Unc-5 homolog C (C. elegans)                                           | <i>UNC5C</i>   | 8633        |
| 231008_at    | Unc-5 homolog C (C. elegans)-like                                      | <i>UNC5CL</i>  | 222643      |
| 212074_at    | unc-84 homolog A (C. elegans)                                          | <i>UNC84A</i>  | 23353       |
| 1562434_at   | unkempt homolog (Drosophila)                                           | <i>UNK</i>     | 85451       |
| 1566896_at   | Signal peptide peptidase 3                                             | <i>UNQ1887</i> | ---         |
| 220507_s_at  | ureidopropionase, beta                                                 | <i>UPB1</i>    | 51733       |
| 228219_s_at  | ureidopropionase, beta                                                 | <i>UPB1</i>    | 51733       |
| 214323_s_at  | UPF3 regulator of nonsense transcripts homolog A (yeast)               | <i>UPF3A</i>   | 65110       |
| 206959_s_at  | UPF3 regulator of nonsense transcripts homolog A (yeast)               | <i>UPF3A</i>   | 65110       |
| 218757_s_at  | UPF3 regulator of nonsense transcripts homolog B (yeast)               | <i>UPF3B</i>   | 65109       |
| 203234_at    | uridine phosphorylase 1                                                | <i>UPP1</i>    | 7378        |
| 226199_at    | uracil phosphoribosyltransferase (FUR1) homolog (S. cerevisiae)        | <i>UPRT</i>    | 139596      |
| 209065_at    | ubiquinol-cytochrome c reductase binding protein                       | <i>UQCRB</i>   | 7381        |
| 241755_at    | ubiquinol-cytochrome c reductase core protein II                       | <i>UQCRC2</i>  | 7385        |
| 212600_s_at  | ubiquinol-cytochrome c reductase core protein II                       | <i>UQCRC2</i>  | 7385        |
| 200883_at    | ubiquinol-cytochrome c reductase core protein II                       | <i>UQCRC2</i>  | 7385        |
| 223303_at    | UNC-112 related protein 2                                              | <i>URP2</i>    | 83706       |
| 209136_s_at  | ubiquitin specific peptidase 10                                        | <i>USP10</i>   | 9100        |
| 209137_s_at  | ubiquitin specific peptidase 10                                        | <i>USP10</i>   | 9100        |
| 213327_s_at  | ubiquitin specific peptidase 12                                        | <i>USP12</i>   | 219333      |
| 226567_at    | ubiquitin specific peptidase 14 (tRNA-guanine transglycosylase)        | <i>USP14</i>   | 9097        |
| 231990_at    | ubiquitin specific peptidase 15                                        | <i>USP15</i>   | 9958        |
| 228822_s_at  | ubiquitin specific peptidase 16                                        | <i>USP16</i>   | 10600       |
| 212388_at    | ubiquitin specific peptidase 24                                        | <i>USP24</i>   | 23358       |
| 212381_at    | ubiquitin specific peptidase 24                                        | <i>USP24</i>   | 23358       |
| 1563497_at   | ubiquitin specific peptidase 25                                        | <i>USP25</i>   | 29761       |
| 231837_at    | ubiquitin specific peptidase 28                                        | <i>USP28</i>   | 57646       |
| 1552678_a_at | ubiquitin specific peptidase 28                                        | <i>USP28</i>   | 57646       |
| 221654_s_at  | ubiquitin specific peptidase 3                                         | <i>USP3</i>    | 9960        |
| 244871_s_at  | ubiquitin specific peptidase 32                                        | <i>USP32</i>   | 84669       |
| 211702_s_at  | ubiquitin specific peptidase 32                                        | <i>USP32</i>   | 84669       |
| 212513_s_at  | ubiquitin specific peptidase 33                                        | <i>USP33</i>   | 23032       |
| 212980_at    | ubiquitin specific peptidase 34                                        | <i>USP34</i>   | 9736        |
| 224978_s_at  | ubiquitin specific peptidase 36                                        | <i>USP36</i>   | 57602       |
| 227093_at    | Ubiquitin specific peptidase 36                                        | <i>USP36</i>   | 57602       |
| 226729_at    | ubiquitin specific peptidase 37                                        | <i>USP37</i>   | 57695       |
| 232033_at    | ubiquitin specific peptidase 37                                        | <i>USP37</i>   | 57695       |
| 226730_s_at  | ubiquitin specific peptidase 37                                        | <i>USP37</i>   | 57695       |
| 211800_s_at  | ubiquitin specific peptidase 4 (proto-oncogene)                        | <i>USP4</i>    | 7375        |
| 202682_s_at  | ubiquitin specific peptidase 4 (proto-oncogene)                        | <i>USP4</i>    | 7375        |
| 225089_at    | ubiquitin specific peptidase 40                                        | <i>USP40</i>   | 55230       |
| 224048_at    | ubiquitin specific peptidase 44                                        | <i>USP44</i>   | 84101       |
| 223701_s_at  | ubiquitin specific peptidase 47                                        | <i>USP47</i>   | 55031       |
| 223117_s_at  | ubiquitin specific peptidase 47                                        | <i>USP47</i>   | 55031       |
| 220078_at    | ubiquitin specific peptidase 48                                        | <i>USP48</i>   | 84196       |
| 220079_s_at  | ubiquitin specific peptidase 48                                        | <i>USP48</i>   | 84196       |
| 231817_at    | ubiquitin specific peptidase 53                                        | <i>USP53</i>   | 54532       |
| 1555063_at   | ubiquitin specific peptidase 6 (Tre-2 oncogene)                        | <i>USP6</i>    | 9098        |
| 1555065_x_at | ubiquitin specific peptidase 6 (Tre-2 oncogene)                        | <i>USP6</i>    | 9098        |
| 201100_s_at  | ubiquitin specific peptidase 9, X-linked                               | <i>USP9X</i>   | 8239        |
| 228492_at    | ubiquitin specific peptidase 9, Y-linked (fat facets-like, Drosophila) | <i>USP9Y</i>   | 100130216 , |
| 205139_s_at  | uronyl-2-sulfotransferase                                              | <i>UST</i>     | 10090       |
| 203614_at    | UTP14, U3 small nucleolar ribonucleoprotein, homolog C (yeast)         | <i>UTP14C</i>  | 9724        |
| 218715_at    | UTP6, small subunit (SSU) processome component, homolog (yeast)        | <i>UTP6</i>    | 55813       |
| 225093_at    | utrophin                                                               | <i>UTRN</i>    | 7402        |
| 213022_s_at  | utrophin                                                               | <i>UTRN</i>    | 7402        |
| 213023_at    | utrophin                                                               | <i>UTRN</i>    | 7402        |
| 203991_s_at  | ubiquitously transcribed tetratricopeptide repeat, X chromosome        | <i>UTX</i>     | 7403        |
| 238220_at    | ubiquitously transcribed tetratricopeptide repeat, X chromosome        | <i>UTX</i>     | 7403        |
| 219675_s_at  | UDP-glucuronate decarboxylase 1                                        | <i>UXS1</i>    | 80146       |
| 218495_at    | ubiquitously-expressed transcript                                      | <i>UXT</i>     | 8409        |



|              |                                                                        |        |            |
|--------------|------------------------------------------------------------------------|--------|------------|
| 214792_x_at  | vesicle-associated membrane protein 2 (synaptobrevin 2)                | VAMP2  | 6844       |
| 201556_s_at  | vesicle-associated membrane protein 2 (synaptobrevin 2)                | VAMP2  | 6844       |
| 201337_s_at  | vesicle-associated membrane protein 3 (cellubrevin)                    | VAMP3  | 9341       |
| 211749_s_at  | vesicle-associated membrane protein 3 (cellubrevin)                    | VAMP3  | 9341       |
| 202546_at    | vesicle-associated membrane protein 8 (endobrevin)                     | VAMP8  | 8673       |
| 208780_x_at  | VAMP (vesicle-associated membrane protein)-associated protein A, 33kDa | VAPA   | 9218       |
| 219740_at    | vasohibin 2                                                            | VASH2  | 79805      |
| 218807_at    | vav 3 guanine nucleotide exchange factor                               | VAV3   | 10451      |
| 224221_s_at  | vav 3 guanine nucleotide exchange factor                               | VAV3   | 10451      |
| 200931_s_at  | vinculin                                                               | VCL    | 7414       |
| 219810_at    | valosin containing protein (p97)/p47 complex interacting protein 1     | VCPIP1 | 80124      |
| 1556227_at   | Valosin containing protein (p97)/p47 complex interacting protein 1     | VCPIP1 | 80124      |
| 217140_s_at  | voltage-dependent anion channel 1                                      | VDAC1  | 100133724, |
| 212038_s_at  | voltage-dependent anion channel 1                                      | VDAC1  | 7416       |
| 211662_s_at  | voltage-dependent anion channel 2                                      | VDAC2  | 7417       |
| 208846_s_at  | voltage-dependent anion channel 3                                      | VDAC3  | 7419       |
| 201831_s_at  | vesicle docking protein p115                                           | VDP    | 8615       |
| 204255_s_at  | vitamin D (1,25- dihydroxyvitamin D3) receptor                         | VDR    | 7421       |
| 204254_s_at  | vitamin D (1,25- dihydroxyvitamin D3) receptor                         | VDR    | 7421       |
| 204253_s_at  | vitamin D (1,25- dihydroxyvitamin D3) receptor                         | VDR    | 7421       |
| 211527_x_at  | vascular endothelial growth factor A                                   | VEGFA  | 7422       |
| 212171_x_at  | vascular endothelial growth factor A                                   | VEGFA  | 7422       |
| 210513_s_at  | vascular endothelial growth factor A                                   | VEGFA  | 7422       |
| 210512_s_at  | vascular endothelial growth factor A                                   | VEGFA  | 7422       |
| 203683_s_at  | vascular endothelial growth factor B                                   | VEGFB  | 7423       |
| 207263_x_at  | vezatin, adherens junctions transmembrane protein                      | VEZT   | 55591      |
| 227399_at    | vestigial like 3 (Drosophila)                                          | VGLL3  | 389136     |
| 214004_s_at  | vestigial like 4 (Drosophila)                                          | VGLL4  | 9686       |
| 212399_s_at  | vestigial like 4 (Drosophila)                                          | VGLL4  | 9686       |
| 1554943_at   | villin 1                                                               | VIL1   | 7429       |
| 208623_s_at  | villin 2 (ezrin)                                                       | VIL2   | 7430       |
| 208622_s_at  | villin 2 (ezrin)                                                       | VIL2   | 7430       |
| 209950_s_at  | villin-like                                                            | VILL   | 50853      |
| 1555938_x_at | vimentin                                                               | VIM    | 7431       |
| 201426_s_at  | vimentin                                                               | VIM    | 7431       |
| 206577_at    | vasoactive intestinal peptide                                          | VIP    | 7432       |
| 226495_at    | Virus-induced signaling adapter                                        | VISA   | 57506      |
| 217949_s_at  | vitamin K epoxide reductase complex, subunit 1                         | VKORC1 | 79001      |
| 209822_s_at  | very low density lipoprotein receptor                                  | VLDLR  | 7436       |
| 1558549_s_at | vanin 1                                                                | VNN1   | 8876       |
| 205922_at    | vanin 2                                                                | VNN2   | 8875       |
| 1553514_a_at | vanin 3                                                                | VNN3   | 55350      |
| 220528_at    | vanin 3                                                                | VNN3   | 55350      |
| 1553513_at   | vanin 3                                                                | VNN3   | 55350      |
| 213243_at    | vacuolar protein sorting 13 homolog B (yeast)                          | VPS13B | 157680     |
| 236254_at    | vacuolar protein sorting 13 homolog B (yeast)                          | VPS13B | 157680     |
| 218396_at    | vacuolar protein sorting 13 homolog C (S. cerevisiae)                  | VPS13C | 54832      |
| 232386_at    | vacuolar protein sorting 13 homolog C (S. cerevisiae)                  | VPS13C | 54832      |
| 220221_at    | vacuolar protein sorting 13 homolog D (S. cerevisiae)                  | VPS13D | 55187      |
| 223346_at    | vacuolar protein sorting 18 homolog (S. cerevisiae)                    | VPS18  | 57617      |
| 1552276_a_at | vacuolar protein sorting 18 homolog (S. cerevisiae)                    | VPS18  | 57617      |
| 217837_s_at  | vacuolar protein sorting 24 homolog (S. cerevisiae)                    | VPS24  | 51652      |
| 222437_s_at  | vacuolar protein sorting 24 homolog (S. cerevisiae)                    | VPS24  | 51652      |
| 222436_s_at  | vacuolar protein sorting 24 homolog (S. cerevisiae)                    | VPS24  | 51652      |
| 201807_at    | vacuolar protein sorting 26 homolog A (S. pombe)                       | VPS26A | 9559       |
| 225483_at    | vacuolar protein sorting 26 homolog B (S. pombe)                       | VPS26B | 112936     |
| 230306_at    | vacuolar protein sorting 26 homolog B (S. pombe)                       | VPS26B | 112936     |
| 222478_at    | vacuolar protein sorting 36 homolog (S. cerevisiae)                    | VPS36  | 51028      |
| 225378_at    | vacuolar protein sorting 37 homolog A (S. cerevisiae)                  | VPS37A | 137492     |
| 1560060_s_at | vacuolar protein sorting 37 homolog C (S. cerevisiae)                  | VPS37C | 55048      |
| 219053_s_at  | vacuolar protein sorting 37 homolog C (S. cerevisiae)                  | VPS37C | 55048      |
| 235625_at    | vacuolar protein sorting 41 homolog (S. cerevisiae)                    | VPS41  | 27072      |
| 214585_s_at  | vacuolar protein sorting 52 homolog (S. cerevisiae)                    | VPS52  | 6293       |

|             |                                                     |                |           |
|-------------|-----------------------------------------------------|----------------|-----------|
| 222627_at   | vacuolar protein sorting 54 homolog (S. cerevisiae) | <i>VPS54</i>   | 51542     |
| 218423_x_at | vacuolar protein sorting 54 homolog (S. cerevisiae) | <i>VPS54</i>   | 51542     |
| 233656_s_at | vacuolar protein sorting 54 homolog (S. cerevisiae) | <i>VPS54</i>   | 51542     |
| 239917_at   | Vacuolar protein sorting 8 homolog (S. cerevisiae)  | <i>VPS8</i>    | 23355     |
| 209553_at   | vacuolar protein sorting 8 homolog (S. cerevisiae)  | <i>VPS8</i>    | 23355     |
| 236937_at   | Vacuolar protein sorting 8 homolog (S. cerevisiae)  | <i>VPS8</i>    | 23355     |
| 203856_at   | vaccinia related kinase 1                           | <i>VRK1</i>    | 7443      |
| 221999_at   | vaccinia related kinase 3                           | <i>VRK3</i>    | 51231     |
| 235818_at   | V-set and transmembrane domain containing 1         | <i>VSTM1</i>   | 284415    |
| 240070_at   | V-set and transmembrane domain containing 3         | <i>VSTM3</i>   | 201633    |
| 223022_s_at | Vps20-associated 1 homolog (S. cerevisiae)          | <i>VTA1</i>    | 51534     |
| 1561200_at  | von Willebrand factor A domain containing 3B        | <i>VWA3B</i>   | 200403    |
| 217742_s_at | WW domain containing adaptor with coiled-coil       | <i>WAC</i>     | 51322     |
| 222389_s_at | WW domain containing adaptor with coiled-coil       | <i>WAC</i>     | 51322     |
| 219679_s_at | WW domain containing adaptor with coiled-coil       | <i>WAC</i>     | 51322     |
| 224563_at   | WAS protein family, member 2                        | <i>WASF2</i>   | 10163     |
| 221725_at   | WAS protein family, member 2                        | <i>WASF2</i>   | ---       |
| 217821_s_at | WW domain binding protein 11                        | <i>WBP11</i>   | 51729     |
| 209117_at   | WW domain binding protein 2                         | <i>WBP2</i>    | 23558     |
| 232964_at   | Williams Beuren syndrome chromosome region 19       | <i>WBSCR19</i> | 285955    |
| 233559_s_at | WD repeat and FYVE domain containing 1              | <i>WDFY1</i>   | 57590     |
| 224800_at   | WD repeat and FYVE domain containing 1              | <i>WDFY1</i>   | 57590     |
| 212606_at   | WD repeat and FYVE domain containing 3              | <i>WDFY3</i>   | 23001     |
| 212602_at   | WD repeat and FYVE domain containing 3              | <i>WDFY3</i>   | 23001     |
| 212598_at   | WD repeat and FYVE domain containing 3              | <i>WDFY3</i>   | 23001     |
| 229597_s_at | WDFY family member 4                                | <i>WDFY4</i>   | 57705     |
| 218512_at   | WD repeat domain 12                                 | <i>WDR12</i>   | 55759     |
| 239916_at   | WD repeat domain 16                                 | <i>WDR16</i>   | 146845    |
| 1554558_at  | WD repeat domain 22                                 | <i>WDR22</i>   | 8816      |
| 224897_at   | WD repeat domain 26                                 | <i>WDR26</i>   | 80232     |
| 224905_at   | WD repeat domain 26                                 | <i>WDR26</i>   | 80232     |
| 218107_at   | WD repeat domain 26                                 | <i>WDR26</i>   | 80232     |
| 235298_at   | WD repeat domain 27                                 | <i>WDR27</i>   | 253769    |
| 218882_s_at | WD repeat domain 3                                  | <i>WDR3</i>    | 10885     |
| 223146_at   | WD repeat domain 33                                 | <i>WDR33</i>   | 55339     |
| 237287_at   | WD repeat domain 34                                 | <i>WDR34</i>   | 89891     |
| 226180_at   | WD repeat domain 36                                 | <i>WDR36</i>   | 134430    |
| 242255_at   | WD repeat domain 37                                 | <i>WDR37</i>   | 100130837 |
| 202249_s_at | WD repeat domain 42A                                | <i>WDR42A</i>  | 50717     |
| 209216_at   | WD repeat domain 45                                 | <i>WDR45</i>   | 11152     |
| 209076_s_at | WDR45-like                                          | <i>WDR45L</i>  | 56270     |
| 226283_at   | WD repeat domain 51B                                | <i>WDR51B</i>  | 282809    |
| 225898_at   | WD repeat domain 54                                 | <i>WDR54</i>   | 84058     |
| 228295_at   | WD repeat domain 59                                 | <i>WDR59</i>   | 79726     |
| 235850_at   | WD repeat domain 5B                                 | <i>WDR5B</i>   | 54554     |
| 219251_s_at | WD repeat domain 60                                 | <i>WDR60</i>   | 55112     |
| 1553373_at  | WD repeat domain 64                                 | <i>WDR64</i>   | 128025    |
| 221745_at   | WD repeat domain 68                                 | <i>WDR68</i>   | 10238     |
| 221744_at   | WD repeat domain 68                                 | <i>WDR68</i>   | 10238     |
| 224730_at   | WD repeat domain 68                                 | <i>WDR68</i>   | 10238     |
| 236134_at   | WD repeat domain 68                                 | <i>WDR68</i>   | 10238     |
| 224748_at   | WD repeat domain 68                                 | <i>WDR68</i>   | 10238     |
| 209592_s_at | WD repeat domain 68                                 | <i>WDR68</i>   | 10238     |
| 212880_at   | WD repeat domain 7                                  | <i>WDR7</i>    | 23335     |
| 227174_at   | WD repeat domain 72                                 | <i>WDR72</i>   | 256764    |
| 219322_s_at | WD repeat domain 8                                  | <i>WDR8</i>    | 49856     |
| 236381_s_at | WD repeat domain 8                                  | <i>WDR8</i>    | 49856     |
| 226738_at   | WD repeat domain 81                                 | <i>WDR81</i>   | 124997    |
| 230888_at   | WD repeat domain 91                                 | <i>WDR91</i>   | 29062     |
| 218971_s_at | WD repeat domain 91                                 | <i>WDR91</i>   | 29062     |
| 222799_at   | WD repeat domain 91                                 | <i>WDR91</i>   | 29062     |
| 231784_s_at | WD repeats and SOF1 domain containing               | <i>WDSOF1</i>  | 25879     |
| 225676_s_at | WD repeats and SOF1 domain containing               | <i>WDSOF1</i>  | 25879     |

|              |                                                                        |                |              |
|--------------|------------------------------------------------------------------------|----------------|--------------|
| 215276_at    | WAP four-disulfide core domain 8                                       | <i>WFDC8</i>   | 90199        |
| 228953_at    | WAS protein homology region 2 domain containing 1                      | <i>WHDC1</i>   | 123720       |
| 213908_at    | WAS protein homology region 2 domain containing 1-like 1               | <i>WHDC1L1</i> | 339005 /// € |
| 209054_s_at  | Wolf-Hirschhorn syndrome candidate 1                                   | <i>WHSC1</i>   | 7468         |
| 221248_s_at  | Wolf-Hirschhorn syndrome candidate 1-like 1                            | <i>WHSC1L1</i> | 54904        |
| 242304_at    | within bgcn homolog (Drosophila)                                       | <i>WIBG</i>    | 84305        |
| 204712_at    | WNT inhibitory factor 1                                                | <i>WIF1</i>    | 11197        |
| 202663_at    | WAS/WASL interacting protein family, member 1                          | <i>WIPF1</i>   | 7456         |
| 202665_s_at  | WAS/WASL interacting protein family, member 1                          | <i>WIPF1</i>   | 7456         |
| 231182_at    | WAS/WASL interacting protein family, member 1                          | <i>WIPF1</i>   | 7456         |
| 212049_at    | WAS/WASL interacting protein family, member 2                          | <i>WIPF2</i>   | 147179       |
| 212051_at    | WAS/WASL interacting protein family, member 2                          | <i>WIPF2</i>   | 147179       |
| 212050_at    | WAS/WASL interacting protein family, member 2                          | <i>WIPF2</i>   | 147179       |
| 39313_at     | WNK lysine deficient protein kinase 1                                  | <i>WNK1</i>    | 65125        |
| 223709_s_at  | wingless-type MMTV integration site family, member 10A                 | <i>WNT10A</i>  | 80326        |
| 205990_s_at  | wingless-type MMTV integration site family, member 5A                  | <i>WNT5A</i>   | 7474         |
| 213425_at    | wingless-type MMTV integration site family, member 5A                  | <i>WNT5A</i>   | 7474         |
| 202749_at    | tryptophan rich basic protein                                          | <i>WRB</i>     | 7485         |
| 205667_at    | Werner syndrome                                                        | <i>WRN</i>     | 7486         |
| 201294_s_at  | WD repeat and SOCS box-containing 1                                    | <i>WSB1</i>    | 26118        |
| 210561_s_at  | WD repeat and SOCS box-containing 1                                    | <i>WSB1</i>    | 26118        |
| 201296_s_at  | WD repeat and SOCS box-containing 1                                    | <i>WSB1</i>    | 26118        |
| 213406_at    | WD repeat and SOCS box-containing 1                                    | <i>WSB1</i>    | 26118        |
| 1560274_at   | Wilms tumor 1 associated protein                                       | <i>WTAP</i>    | 100132279 ,  |
| 203137_at    | Wilms tumor 1 associated protein                                       | <i>WTAP</i>    | 9589         |
| 210285_x_at  | Wilms tumor 1 associated protein                                       | <i>WTAP</i>    | 9589         |
| 229630_s_at  | Wilms tumor 1 associated protein                                       | <i>WTAP</i>    | 9589         |
| 227621_at    | Wilms tumor 1 associated protein                                       | <i>WTAP</i>    | 9589         |
| 237656_at    | WW and C2 domain containing 2                                          | <i>WWC2</i>    | 80014        |
| 1552737_s_at | WW domain containing E3 ubiquitin protein ligase 2                     | <i>WWP2</i>    | 11060        |
| 210200_at    | WW domain containing E3 ubiquitin protein ligase 2                     | <i>WWP2</i>    | 11060        |
| 228617_at    | XIAP associated factor-1                                               | <i>XAF1</i>    | 54739        |
| 206133_at    | XIAP associated factor-1                                               | <i>XAF1</i>    | 54739        |
| 242234_at    | XIAP associated factor-1                                               | <i>XAF1</i>    | 54739        |
| 200670_at    | X-box binding protein 1                                                | <i>XBP1</i>    | 7494         |
| 206698_at    | X-linked Kx blood group (McLeod syndrome)                              | <i>XK</i>      | 7504         |
| 237802_at    | XK, Kell blood group complex subunit-related family, member 4          | <i>XKR4</i>    | 114786       |
| 209375_at    | xeroderma pigmentosum, complementation group C                         | <i>XPC</i>     | 7508         |
| 209045_at    | X-prolyl aminopeptidase (aminopeptidase P) 1, soluble                  | <i>XPNPEP1</i> | 7511         |
| 208453_s_at  | X-prolyl aminopeptidase (aminopeptidase P) 1, soluble                  | <i>XPNPEP1</i> | 7511         |
| 237750_at    | X-prolyl aminopeptidase (aminopeptidase P) 3, putative                 | <i>XPNPEP3</i> | 63929        |
| 226501_at    | X-prolyl aminopeptidase (aminopeptidase P) 3, putative                 | <i>XPNPEP3</i> | 63929        |
| 240168_at    | exportin 7                                                             | <i>XPO7</i>    | 23039        |
| 222581_at    | xenotropic and polytropic retrovirus receptor                          | <i>XPR1</i>    | 9213         |
| 207598_x_at  | X-ray repair complementing defective repair in Chinese hamster cells 2 | <i>XRCC2</i>   | 7516         |
| 205071_x_at  | X-ray repair complementing defective repair in Chinese hamster cells 4 | <i>XRCC4</i>   | 7518         |
| 1555785_a_at | 5'-3' exoribonuclease 1                                                | <i>XRN1</i>    | 54464        |
| 223002_s_at  | 5'-3' exoribonuclease 2                                                | <i>XRN2</i>    | 22803        |
| 233878_s_at  | 5'-3' exoribonuclease 2                                                | <i>XRN2</i>    | 22803        |
| 230557_at    | X-ray radiation resistance associated 1                                | <i>XRRA1</i>   | 143570       |
| 1569683_at   | xylokinase homolog (H. influenzae)                                     | <i>XYLB</i>    | 9942         |
| 213725_x_at  | xylosyltransferase I                                                   | <i>XYLT1</i>   | 64131        |
| 224894_at    | Yes-associated protein 1, 65kDa                                        | <i>YAP1</i>    | 10413        |
| 224895_at    | Yes-associated protein 1, 65kDa                                        | <i>YAP1</i>    | 10413        |
| 1557047_at   | YEATS domain containing 2                                              | <i>YEATS2</i>  | 55689        |
| 221203_s_at  | YEATS domain containing 2                                              | <i>YEATS2</i>  | 55689        |
| 202933_s_at  | v-yes-1 Yamaguchi sarcoma viral oncogene homolog 1                     | <i>YES1</i>    | 7525         |
| 1554553_s_at | Yip1 interacting factor homolog B (S. cerevisiae)                      | <i>YIF1B</i>   | 90522        |
| 216338_s_at  | Yip1 domain family, member 3                                           | <i>YIPF3</i>   | 25844        |
| 209551_at    | Yip1 domain family, member 4                                           | <i>YIPF4</i>   | 84272        |
| 212341_at    | Yip1 domain family, member 6                                           | <i>YIPF6</i>   | 286451       |
| 212343_at    | Yip1 domain family, member 6                                           | <i>YIPF6</i>   | 286451       |
| 217785_s_at  | YKT6 v-SNARE homolog (S. cerevisiae)                                   | <i>YKT6</i>    | 10652        |

|              |                                                                            |         |           |
|--------------|----------------------------------------------------------------------------|---------|-----------|
| 1557065_at   | YLP motif containing 1                                                     | YLPM1   | 56252     |
| 214659_x_at  | YLP motif containing 1                                                     | YLPM1   | 56252     |
| 201351_s_at  | YME1-like 1 ( <i>S. cerevisiae</i> )                                       | YME1L1  | 10730     |
| 216304_x_at  | YME1-like 1 ( <i>S. cerevisiae</i> )                                       | YME1L1  | 10730     |
| 215150_at    | YOD1 OTU deubiquinating enzyme 1 homolog ( <i>S. cerevisiae</i> )          | YOD1    | 55432     |
| 228788_at    | yippee-like 1 ( <i>Drosophila</i> )                                        | YPEL1   | 29799     |
| 227020_at    | yippee-like 2 ( <i>Drosophila</i> )                                        | YPEL2   | 388403    |
| 223179_at    | yippee-like 3 ( <i>Drosophila</i> )                                        | YPEL3   | 83719     |
| 232077_s_at  | yippee-like 3 ( <i>Drosophila</i> )                                        | YPEL3   | 83719     |
| 217783_s_at  | yippee-like 5 ( <i>Drosophila</i> )                                        | YPEL5   | 51646     |
| 222408_s_at  | yippee-like 5 ( <i>Drosophila</i> )                                        | YPEL5   | 51646     |
| 214814_at    | YTH domain containing 1                                                    | YTHDC1  | 91746     |
| 212455_at    | YTH domain containing 1                                                    | YTHDC1  | 91746     |
| 205836_s_at  | YTH domain containing 2                                                    | YTHDC2  | 64848     |
| 213077_at    | YTH domain containing 2                                                    | YTHDC2  | 64848     |
| 221749_at    | YTH domain family, member 3                                                | YTHDF3  | 253943    |
| 1564053_a_at | YTH domain family, member 3                                                | YTHDF3  | 253943    |
| 217718_s_at  | tyrosine 3-monooxygenase/tryptophan 5-monooxygenase activation protein, bε | YWHAH   | 7529      |
| 222985_at    | tyrosine 3-monooxygenase/tryptophan 5-monooxygenase activation protein, gε | YWHAH   | 7532      |
| 212426_s_at  | tyrosine 3-monooxygenase/tryptophan 5-monooxygenase activation protein, th | YWHAQ   | 10971     |
| 213699_s_at  | tyrosine 3-monooxygenase/tryptophan 5-monooxygenase activation protein, th | YWHAQ   | 10971     |
| 200693_at    | tyrosine 3-monooxygenase/tryptophan 5-monooxygenase activation protein, th | YWHAQ   | 10971     |
| 200047_s_at  | YY1 transcription factor                                                   | YY1     | 7528      |
| 201901_s_at  | YY1 transcription factor                                                   | YY1     | 7528      |
| 224711_at    | YY1 transcription factor                                                   | YY1     | 7528      |
| 224718_at    | YY1 transcription factor                                                   | YY1     | 7528      |
| 217836_s_at  | YY1 associated protein 1                                                   | YY1AP1  | 55249     |
| 227977_at    | zinc binding alcohol dehydrogenase, domain containing 2                    | ZADH2   | 284273    |
| 1554239_s_at | zinc binding alcohol dehydrogenase, domain containing 2                    | ZADH2   | 284273    |
| 227978_s_at  | zinc binding alcohol dehydrogenase, domain containing 2                    | ZADH2   | 284273    |
| 214032_at    | zeta-chain (TCR) associated protein kinase 70kDa                           | ZAP70   | 7535      |
| 1555613_a_at | zeta-chain (TCR) associated protein kinase 70kDa                           | ZAP70   | 7535      |
| 1554821_a_at | zinc finger, BED-type containing 1                                         | ZBED1   | 9189      |
| 208087_s_at  | Z-DNA binding protein 1                                                    | ZBP1    | 81030     |
| 242020_s_at  | Z-DNA binding protein 1                                                    | ZBP1    | 81030     |
| 213376_at    | zinc finger and BTB domain containing 1                                    | ZBTB1   | 22890     |
| 233899_x_at  | Zinc finger and BTB domain containing 10                                   | ZBTB10  | 65986     |
| 219312_s_at  | zinc finger and BTB domain containing 10                                   | ZBTB10  | 65986     |
| 214482_at    | zinc finger and BTB domain containing 25                                   | ZBTB25  | 7597      |
| 227162_at    | zinc finger and BTB domain containing 26                                   | ZBTB26  | 57684     |
| 236557_at    | zinc finger and BTB domain containing 38                                   | ZBTB38  | 253461    |
| 225512_at    | zinc finger and BTB domain containing 38                                   | ZBTB38  | 253461    |
| 219221_at    | zinc finger and BTB domain containing 38                                   | ZBTB38  | 253461    |
| 226962_at    | zinc finger and BTB domain containing 41                                   | ZBTB41  | 360023    |
| 204182_s_at  | zinc finger and BTB domain containing 43                                   | ZBTB43  | 23099     |
| 225845_at    | zinc finger and BTB domain containing 44                                   | ZBTB44  | 29068     |
| 226148_at    | zinc finger and BTB domain containing 44                                   | ZBTB44  | 29068     |
| 1554470_s_at | zinc finger and BTB domain containing 44                                   | ZBTB44  | 29068     |
| 1554469_at   | zinc finger and BTB domain containing 44                                   | ZBTB44  | 29068     |
| 205025_at    | zinc finger and BTB domain containing 48                                   | ZBTB48  | 3104      |
| 206098_at    | zinc finger and BTB domain containing 6                                    | ZBTB6   | 10773     |
| 1565867_a_at | zinc finger CCCH-type containing 11A                                       | ZC3H11A | 100131402 |
| 205788_s_at  | zinc finger CCCH-type containing 11A                                       | ZC3H11A | 9877      |
| 218810_at    | zinc finger CCCH-type containing 12A                                       | ZC3H12A | 80149     |
| 227536_at    | zinc finger CCCH-type containing 13                                        | ZC3H13  | 23091     |
| 209851_at    | zinc finger CCCH-type containing 13                                        | ZC3H13  | 23091     |
| 213064_at    | zinc finger CCCH-type containing 14                                        | ZC3H14  | 79882     |
| 201595_s_at  | zinc finger CCCH-type containing 15                                        | ZC3H15  | 55854     |
| 201593_s_at  | zinc finger CCCH-type containing 15                                        | ZC3H15  | 55854     |
| 213445_at    | zinc finger CCCH-type containing 3                                         | ZC3H3   | 23144     |
| 226897_s_at  | zinc finger CCCH-type containing 7A                                        | ZC3H7A  | 29066     |
| 218348_s_at  | zinc finger CCCH-type containing 7A                                        | ZC3H7A  | 29066     |
| 206169_x_at  | zinc finger CCCH-type containing 7B                                        | ZC3H7B  | 23264     |

|              |                                                                 |             |            |
|--------------|-----------------------------------------------------------------|-------------|------------|
| 223506_at    | zinc finger CCCH-type containing 8                              | ZC3H8       | 84524      |
| 213051_at    | zinc finger CCCH-type, antiviral 1                              | ZC3HAV1     | 56829      |
| 225634_at    | zinc finger CCCH-type, antiviral 1                              | ZC3HAV1     | 56829      |
| 223108_s_at  | zinc finger, CCHC domain containing 17                          | ZCCHC17     | 51538      |
| 219062_s_at  | zinc finger, CCHC domain containing 2                           | ZCCHC2      | 54877      |
| 224503_s_at  | zinc finger, CCHC domain containing 2                           | ZCCHC2      | 54877      |
| 244034_at    | zinc finger, CCHC domain containing 2                           | ZCCHC2      | ---        |
| 233425_at    | zinc finger, CCHC domain containing 2                           | ZCCHC2      | ---        |
| 220933_s_at  | zinc finger, CCHC domain containing 6                           | ZCCHC6      | 79670      |
| 236155_at    | Zinc finger, CCHC domain containing 6                           | ZCCHC6      | 79670      |
| 236243_at    | Zinc finger, CCHC domain containing 6                           | ZCCHC6      | 79670      |
| 238800_s_at  | Zinc finger, CCHC domain containing 6                           | ZCCHC6      | 79670      |
| 230332_at    | Zinc finger, CCHC domain containing 7                           | ZCCHC7      | 84186      |
| 1560977_a_at | hypothetical protein ZD77D08                                    | ZD77D08     | 23786      |
| 221646_s_at  | zinc finger, DHHC-type containing 11                            | ZDHHC11     | 79844      |
| 226088_at    | zinc finger, DHHC-type containing 12                            | ZDHHC12     | 84885      |
| 232440_at    | Zinc finger, DHHC-type containing 13                            | ZDHHC13     | 54503      |
| 212860_at    | zinc finger, DHHC-type containing 18                            | ZDHHC18     | 84243      |
| 231908_at    | zinc finger, DHHC-type containing 18                            | ZDHHC18     | 84243      |
| 222731_at    | zinc finger, DHHC-type containing 2                             | ZDHHC2      | 51201      |
| 243835_at    | Zinc finger, DHHC-type containing 21                            | ZDHHC21     | 340481     |
| 229240_at    | Zinc finger, DHHC-type containing 21                            | ZDHHC21     | 340481     |
| 235068_at    | zinc finger, DHHC-type containing 21                            | ZDHHC21     | 340481     |
| 241946_at    | zinc finger, DHHC-type containing 21                            | ZDHHC21     | 340481     |
| 224868_at    | zinc finger, DHHC-type containing 5                             | ZDHHC5      | 25921      |
| 224858_at    | zinc finger, DHHC-type containing 5                             | ZDHHC5      | 25921      |
| 210875_s_at  | zinc finger E-box binding homeobox 1                            | ZEB1        | 6935       |
| 212764_at    | zinc finger E-box binding homeobox 1                            | ZEB1        | 6935       |
| 212758_s_at  | zinc finger E-box binding homeobox 1                            | ZEB1        | 6935       |
| 233031_at    | zinc finger E-box binding homeobox 2                            | ZEB2        | 100128821, |
| 203603_s_at  | zinc finger E-box binding homeobox 2                            | ZEB2        | 9839       |
| 235593_at    | zinc finger E-box binding homeobox 2                            | ZEB2        | 100128821, |
| 202456_s_at  | zer-1 homolog (C. elegans)                                      | ZER1        | 10444      |
| 226650_at    | zinc finger, AN1-type domain 2A                                 | ZFAND2A     | 90637      |
| 226168_at    | zinc finger, AN1-type domain 2B                                 | ZFAND2B     | 130617     |
| 218020_s_at  | zinc finger, AN1-type domain 3                                  | ZFAND3      | 60685      |
| 222493_s_at  | zinc finger, AN1-type domain 3                                  | ZFAND3      | 60685      |
| 210275_s_at  | zinc finger, AN1-type domain 5                                  | ZFAND5      | 7763       |
| 217741_s_at  | zinc finger, AN1-type domain 5                                  | ZFAND5      | 7763       |
| 221613_s_at  | zinc finger, AN1-type domain 6                                  | ZFAND6      | 54469      |
| 226137_at    | zinc finger homeobox 3                                          | ZFHX3       | 463        |
| 241700_at    | zinc finger homeobox 4                                          | ZFHX4       | 79776      |
| 234455_at    | zinc finger protein 1 homolog (mouse)                           | ZFP1        | 162239     |
| 222407_s_at  | zinc finger protein 106 homolog (mouse)                         | ZFP106      | 64397      |
| 232911_at    | zinc finger protein 14 homolog (mouse)                          | ZFP14       | 57677      |
| 209724_s_at  | zinc finger protein 161 homolog (mouse)                         | ZFP161      | 7541       |
| 240565_at    | zinc finger protein 28 homolog (mouse)                          | ZFP28       | 140612     |
| 201531_at    | zinc finger protein 36, C3H type, homolog (mouse)               | ZFP36       | 7538       |
| 211962_s_at  | zinc finger protein 36, C3H type-like 1                         | ZFP36L1     | 677        |
| 211965_at    | zinc finger protein 36, C3H type-like 1                         | ZFP36L1     | 677        |
| 201369_s_at  | zinc finger protein 36, C3H type-like 2                         | ZFP36L2     | 678        |
| 201367_s_at  | zinc finger protein 36, C3H type-like 2                         | ZFP36L2     | 678        |
| 243161_x_at  | zinc finger protein 42 homolog (mouse)                          | ZFP42       | 132625     |
| 235698_at    | zinc finger protein 90 homolog (mouse)                          | ZFP90       | 146198     |
| 209428_s_at  | zinc finger protein-like 1                                      | ZFPL1       | 7542       |
| 214310_s_at  | zinc finger protein-like 1                                      | ZFPL1       | 7542       |
| 207920_x_at  | zinc finger protein, X-linked                                   | ZFX         | 7543       |
| 217176_s_at  | zinc finger protein, X-linked                                   | ZFX         | 7543       |
| 207247_s_at  | zinc finger protein, X-linked /// zinc finger protein, Y-linked | ZFX /// ZFY | 100130829, |
| 223388_s_at  | zinc finger, FYVE domain containing 1                           | ZFYVE1      | 53349      |
| 203651_at    | zinc finger, FYVE domain containing 16                          | ZFYVE16     | 9765       |
| 1554638_at   | zinc finger, FYVE domain containing 16                          | ZFYVE16     | 9765       |
| 224445_s_at  | zinc finger, FYVE domain containing 21                          | ZFYVE21     | 79038      |

|              |                                                               |          |            |
|--------------|---------------------------------------------------------------|----------|------------|
| 37943_at     | zinc finger, FYVE domain containing 26                        | ZFYVE26  | 23503      |
| 221848_at    | zinc finger, CCCH-type with G patch domain                    | ZGPAT    | 84619      |
| 223214_s_at  | zinc fingers and homeoboxes 1                                 | ZHX1     | 11244      |
| 223213_s_at  | zinc fingers and homeoboxes 1                                 | ZHX1     | 11244      |
| 203556_at    | zinc fingers and homeoboxes 2                                 | ZHX2     | 22882      |
| 1557706_at   | zinc fingers and homeoboxes 2                                 | ZHX2     | 22882      |
| 214670_at    | zinc finger with KRAB and SCAN domains 1                      | ZKSCAN1  | 7586       |
| 213625_at    | zinc finger with KRAB and SCAN domains 4                      | ZKSCAN4  | 387032     |
| 226344_at    | zinc finger, matrin type 1                                    | ZMAT1    | 84460      |
| 219628_at    | zinc finger, matrin type 3                                    | ZMAT3    | 64393      |
| 218752_at    | zinc finger, matrin type 5                                    | ZMAT5    | 55954      |
| 212124_at    | zinc finger, MIZ-type containing 1                            | ZMIZ1    | 57178      |
| 54970_at     | zinc finger, MIZ-type containing 2                            | ZMIZ2    | 83637      |
| 202939_at    | zinc metalloproteinase (STE24 homolog, <i>S. cerevisiae</i> ) | ZMPSTE24 | 10269      |
| 210282_at    | zinc finger, MYM-type 2                                       | ZMYM2    | 7750       |
| 210281_s_at  | zinc finger, MYM-type 2                                       | ZMYM2    | 7750       |
| 202778_s_at  | zinc finger, MYM-type 2                                       | ZMYM2    | 7750       |
| 202050_s_at  | zinc finger, MYM-type 4                                       | ZMYM4    | 9202       |
| 202051_s_at  | zinc finger, MYM-type 4                                       | ZMYM4    | 9202       |
| 202049_s_at  | zinc finger, MYM-type 4                                       | ZMYM4    | 9202       |
| 206744_s_at  | zinc finger, MYM-type 5                                       | ZMYM5    | 9205       |
| 215948_x_at  | zinc finger, MYM-type 5                                       | ZMYM5    | 9205       |
| 213698_at    | zinc finger, MYM-type 6                                       | ZMYM6    | 100130633, |
| 227595_at    | zinc finger, MYM-type 6                                       | ZMYM6    | 9204       |
| 1561892_at   | zinc finger, MYM-type 6                                       | ZMYM6    | 9204       |
| 202136_at    | zinc finger, MYND domain containing 11                        | ZMYND11  | 10771      |
| 223683_at    | zinc finger, MYND-type containing 15                          | ZMYND15  | 84225      |
| 230533_at    | zinc finger, MYND-type containing 8                           | ZMYND8   | 23613      |
| 235408_x_at  | zinc finger protein 117                                       | ZNF117   | 51351      |
| 219571_s_at  | zinc finger protein 12                                        | ZNF12    | 7559       |
| 226015_at    | zinc finger protein 12                                        | ZNF12    | 7559       |
| 1559881_s_at | zinc finger protein 12                                        | ZNF12    | 7559       |
| 1554021_a_at | zinc finger protein 12                                        | ZNF12    | 7559       |
| 227729_at    | Zinc finger protein 134                                       | ZNF134   | ---        |
| 207394_at    | zinc finger protein 137                                       | ZNF137   | 7696       |
| 206931_at    | zinc finger protein 141                                       | ZNF141   | 7700       |
| 221873_at    | zinc finger protein 143                                       | ZNF143   | 7702       |
| 230821_at    | zinc finger protein 148                                       | ZNF148   | 7707       |
| 203319_s_at  | zinc finger protein 148                                       | ZNF148   | 7707       |
| 203318_s_at  | zinc finger protein 148                                       | ZNF148   | 7707       |
| 235166_at    | zinc finger protein 148                                       | ZNF148   | 7707       |
| 214715_x_at  | zinc finger protein 160                                       | ZNF160   | 90338      |
| 224014_at    | zinc finger protein 160                                       | ZNF160   | 90338      |
| 1567032_s_at | zinc finger protein 160                                       | ZNF160   | 90338      |
| 239954_at    | zinc finger protein 160                                       | ZNF160   | 90338      |
| 206683_at    | zinc finger protein 165                                       | ZNF165   | 7718       |
| 206314_at    | zinc finger protein 167                                       | ZNF167   | 55888      |
| 1570354_s_at | zinc finger protein 169                                       | ZNF169   | 169841     |
| 205252_at    | zinc finger protein 174                                       | ZNF174   | 7727       |
| 226787_at    | zinc finger protein 18                                        | ZNF18    | 7566       |
| 203585_at    | zinc finger protein 185 (LIM domain)                          | ZNF185   | 7739       |
| 213218_at    | zinc finger protein 187                                       | ZNF187   | 7741       |
| 206579_at    | zinc finger protein 192                                       | ZNF192   | 7745       |
| 204234_s_at  | zinc finger protein 195                                       | ZNF195   | 7748       |
| 223792_at    | zinc finger protein 2                                         | ZNF2     | 7549       |
| 214706_at    | zinc finger protein 200                                       | ZNF200   | 7752       |
| 200829_x_at  | zinc finger protein 207                                       | ZNF207   | 7756       |
| 200828_s_at  | zinc finger protein 207                                       | ZNF207   | 7756       |
| 239937_at    | Zinc finger protein 207                                       | ZNF207   | 7756       |
| 220497_at    | zinc finger protein 214                                       | ZNF214   | 7761       |
| 203739_at    | zinc finger protein 217                                       | ZNF217   | 7764       |
| 218005_at    | zinc finger protein 22 (KOX 15)                               | ZNF22    | 7570       |
| 206175_x_at  | zinc finger protein 222                                       | ZNF222   | 7673       |

|              |                                                     |                   |             |
|--------------|-----------------------------------------------------|-------------------|-------------|
| 207128_s_at  | zinc finger protein 223                             | ZNF223            | 7766        |
| 222947_at    | Zinc finger protein 224                             | ZNF224            | 7767        |
| 235702_at    | Zinc finger protein 225                             | ZNF225            | ---         |
| 224004_at    | zinc finger protein 226                             | ZNF226            | 7769        |
| 233461_x_at  | zinc finger protein 226                             | ZNF226            | 7769        |
| 222237_s_at  | zinc finger protein 228                             | ZNF228            | 7771        |
| 205791_x_at  | zinc finger protein 230                             | ZNF230            | 7773        |
| 219123_at    | zinc finger protein 232                             | ZNF232            | 7775        |
| 219171_s_at  | zinc finger protein 236                             | ZNF236            | 7776        |
| 47571_at     | zinc finger protein 236                             | ZNF236            | 7776        |
| 242210_at    | Zinc finger protein 24                              | ZNF24             | 7572        |
| 203247_s_at  | zinc finger protein 24                              | ZNF24             | 7572        |
| 1554045_at   | zinc finger protein 24                              | ZNF24             | 7572        |
| 1569557_at   | zinc finger protein 248                             | ZNF248            | 57209       |
| 206900_x_at  | zinc finger protein 253                             | ZNF253            | 56242       |
| 236133_x_at  | zinc finger protein 254                             | ZNF254            | 9534        |
| 242602_x_at  | zinc finger protein 254                             | ZNF254            | 9534        |
| 210697_at    | zinc finger protein 257                             | ZNF257            | 113835      |
| 228920_at    | zinc finger protein 260                             | ZNF260            | 339324      |
| 205917_at    | zinc finger protein 264                             | ZNF264            | 9422        |
| 219540_at    | zinc finger protein 267                             | ZNF267            | 10308       |
| 209989_at    | zinc finger protein 268                             | ZNF268            | 10795       |
| 204937_s_at  | zinc finger protein 274                             | ZNF274            | 10782       |
| 225383_at    | zinc finger protein 275                             | ZNF275            | 10838       |
| 218645_at    | zinc finger protein 277 pseudogene                  | ZNF277P           | 11179       |
| 1555193_a_at | zinc finger protein 277 pseudogene                  | ZNF277P           | 11179       |
| 1567853_at   | zinc finger protein 28                              | ZNF28             | 7576        |
| 228785_at    | Zinc finger protein 281                             | ZNF281            | 23528       |
| 222619_at    | zinc finger protein 281                             | ZNF281            | 23528       |
| 236328_at    | zinc finger protein 285A                            | ZNF285A           | 26974       |
| 220055_at    | zinc finger protein 287                             | ZNF287            | 57336       |
| 211975_at    | zinc finger protein 289, ID1 regulated              | ZNF289            | 84364       |
| 212368_at    | zinc finger protein 292                             | ZNF292            | 23036       |
| 212366_at    | zinc finger protein 292                             | ZNF292            | 23036       |
| 215596_s_at  | zinc finger protein 294                             | ZNF294            | 26046       |
| 233952_s_at  | zinc finger protein 295                             | ZNF295            | 49854       |
| 225539_at    | zinc finger protein 295                             | ZNF295            | 49854       |
| 212684_at    | zinc finger protein 3                               | ZNF3              | 7551        |
| 232014_at    | zinc finger protein 30                              | ZNF30             | 90075       |
| 218490_s_at  | zinc finger protein 302                             | ZNF302            | 55900       |
| 228393_s_at  | zinc finger protein 302                             | ZNF302            | 55900       |
| 228392_at    | zinc finger protein 302                             | ZNF302            | 55900       |
| 200868_s_at  | zinc finger protein 313                             | ZNF313            | 55905       |
| 203520_s_at  | zinc finger protein 318                             | ZNF318            | 24149       |
| 228460_at    | zinc finger protein 319                             | ZNF319            | 57567       |
| 229614_at    | zinc finger protein 320                             | ZNF320            | 162967      |
| 241704_x_at  | zinc finger protein 320                             | ZNF320            | 162967      |
| 227980_at    | zinc finger protein 322A                            | ZNF322A           | 79692       |
| 219376_at    | zinc finger protein 322B                            | ZNF322B           | 387328      |
| 227613_at    | zinc finger protein 331                             | ZNF331            | 55422       |
| 219228_at    | zinc finger protein 331                             | ZNF331            | 55422       |
| 1552375_at   | zinc finger protein 333                             | ZNF333            | 84449       |
| 1563783_a_at | zinc finger protein 333                             | ZNF333            | 84449       |
| 1569251_a_at | zinc finger protein 333                             | ZNF333            | 84449       |
| 37860_at     | zinc finger protein 337                             | ZNF337            | 26152       |
| 224276_at    | zinc finger protein 33A                             | ZNF33A            | 7581        |
| 206096_at    | zinc finger protein 35                              | ZNF35             | 7584        |
| 1553612_at   | zinc finger protein 354B                            | ZNF354B           | 117608      |
| 206448_at    | zinc finger protein 365                             | ZNF365            | 22891       |
| 229551_x_at  | zinc finger protein 367                             | ZNF367            | 195828      |
| 228711_at    | zinc finger protein 37A                             | ZNF37A            | 7587        |
| 214878_at    | zinc finger protein 37A /// zinc finger protein 37B | ZNF37A /// ZNF37E | 100129482 , |
| 215358_x_at  | zinc finger protein 37B                             | ZNF37B            | 100129482 , |

|              |                          |         |              |
|--------------|--------------------------|---------|--------------|
| 214714_at    | zinc finger protein 394  | ZNF394  | 84124        |
| 218149_s_at  | zinc finger protein 395  | ZNF395  | 55893        |
| 221123_x_at  | zinc finger protein 395  | ZNF395  | 55893        |
| 232694_at    | zinc finger protein 395  | ZNF395  | 55893        |
| 222536_s_at  | zinc finger protein 395  | ZNF395  | 55893        |
| 1555166_a_at | zinc finger protein 396  | ZNF396  | 252884       |
| 1552825_at   | zinc finger protein 396  | ZNF396  | 252884       |
| 228927_at    | zinc finger protein 397  | ZNF397  | 84307        |
| 235271_s_at  | zinc finger protein 397  | ZNF397  | 100101467    |
| 207699_at    | zinc finger protein 409  | ZNF409  | 22830        |
| 238937_at    | zinc finger protein 420  | ZNF420  | 147923       |
| 244752_at    | zinc finger protein 438  | ZNF438  | 220929       |
| 229743_at    | zinc finger protein 438  | ZNF438  | 220929       |
| 228718_at    | zinc finger protein 44   | ZNF44   | 51710        |
| 222028_at    | zinc finger protein 45   | ZNF45   | 7596         |
| 214746_s_at  | zinc finger protein 467  | ZNF467  | 168544       |
| 214751_at    | zinc finger protein 468  | ZNF468  | 90333        |
| 1555368_x_at | zinc finger protein 479  | ZNF479  | 90827        |
| 1555367_at   | zinc finger protein 479  | ZNF479  | 90827        |
| 1553901_x_at | zinc finger protein 486  | ZNF486  | 90649        |
| 215532_x_at  | zinc finger protein 492  | ZNF492  | 57615        |
| 235604_x_at  | zinc finger protein 493  | ZNF493  | 284443       |
| 206053_at    | zinc finger protein 510  | ZNF510  | 22869        |
| 225050_at    | zinc finger protein 512  | ZNF512  | 84450        |
| 55872_at     | zinc finger protein 512B | ZNF512B | 57473        |
| 235729_at    | zinc finger protein 514  | ZNF514  | 84874        |
| 203604_at    | zinc finger protein 516  | ZNF516  | 9658         |
| 204291_at    | zinc finger protein 518  | ZNF518  | 9849         |
| 244132_x_at  | Zinc finger protein 518  | ZNF518  | 9849         |
| 1568873_at   | zinc finger protein 519  | ZNF519  | 162655       |
| 1557283_a_at | zinc finger protein 519  | ZNF519  | 162655       |
| 215307_at    | Zinc finger protein 529  | ZNF529  | 57711        |
| 225021_at    | zinc finger protein 532  | ZNF532  | 55205        |
| 240191_at    | Zinc finger protein 543  | ZNF543  | 125919       |
| 218735_s_at  | zinc finger protein 544  | ZNF544  | 27300        |
| 1553718_at   | zinc finger protein 548  | ZNF548  | 147694       |
| 228099_at    | zinc finger protein 550  | ZNF550  | 162972       |
| 211721_s_at  | zinc finger protein 551  | ZNF551  | 90233        |
| 219741_x_at  | zinc finger protein 552  | ZNF552  | 79818        |
| 220444_at    | zinc finger protein 557  | ZNF557  | 79230        |
| 227810_at    | zinc finger protein 558  | ZNF558  | 148156       |
| 242429_at    | zinc finger protein 567  | ZNF567  | 163081       |
| 217627_at    | zinc finger protein 573  | ZNF573  | 126231       |
| 218762_at    | zinc finger protein 574  | ZNF574  | 64763        |
| 1563725_at   | zinc finger protein 583  | ZNF583  | 147949       |
| 1553221_at   | zinc finger protein 583  | ZNF583  | 147949       |
| 1554824_at   | zinc finger protein 585A | ZNF585A | 199704       |
| 1554665_at   | Zinc finger protein 587  | ZNF587  | 54807        |
| 1558253_x_at | zinc finger protein 587  | ZNF587  | 84914        |
| 1569108_a_at | zinc finger protein 589  | ZNF589  | 51385        |
| 230542_at    | zinc finger protein 597  | ZNF597  | 146434       |
| 225104_at    | zinc finger protein 598  | ZNF598  | 90850        |
| 1558391_s_at | zinc finger protein 599  | ZNF599  | 148103       |
| 242463_x_at  | zinc finger protein 600  | ZNF600  | 162966       |
| 219635_at    | zinc finger protein 606  | ZNF606  | 80095        |
| 229707_at    | zinc finger protein 606  | ZNF606  | 80095        |
| 235953_at    | zinc finger protein 610  | ZNF610  | 162963       |
| 220721_at    | zinc finger protein 614  | ZNF614  | 80110 /// 96 |
| 1558620_at   | zinc finger protein 621  | ZNF621  | 285268       |
| 1560075_at   | Zinc finger protein 622  | ZNF622  | 90441        |
| 222624_s_at  | zinc finger protein 639  | ZNF639  | 51193        |
| 1553725_s_at | zinc finger protein 644  | ZNF644  | 84146        |
| 1552967_at   | zinc finger protein 645  | ZNF645  | 158506       |



|              |                                                       |                     |              |
|--------------|-------------------------------------------------------|---------------------|--------------|
| 244121_at    | Zinc finger protein 650                               | ZNF650              | 130507       |
| 235577_at    | Zinc finger protein 652                               | ZNF652              | ---          |
| 205594_at    | zinc finger protein 652                               | ZNF652              | 22834        |
| 228864_at    | zinc finger protein 653                               | ZNF653              | 115950       |
| 241348_at    | zinc finger protein 654                               | ZNF654              | 55279        |
| 219239_s_at  | zinc finger protein 654                               | ZNF654              | 55279        |
| 1556744_a_at | zinc finger protein 654                               | ZNF654              | ---          |
| 242017_at    | zinc finger protein 654                               | ZNF654              | ---          |
| 222851_at    | zinc finger protein 654                               | ZNF654              | 55279        |
| 1556743_at   | zinc finger protein 654                               | ZNF654              | ---          |
| 225945_at    | zinc finger protein 655                               | ZNF655              | 79027        |
| 1569935_at   | Zinc finger protein 664                               | ZNF664              | 144348       |
| 220760_x_at  | zinc finger protein 665                               | ZNF665              | 79788        |
| 222509_s_at  | zinc finger protein 672                               | ZNF672              | 79894        |
| 1554465_s_at | zinc finger protein 673 /// zinc finger protein 674   | ZNF673 /// ZNF674   | 55634 /// 64 |
| 1554922_at   | zinc finger protein 678                               | ZNF678              | 339500       |
| 232028_at    | Zinc finger protein 678                               | ZNF678              | 339500       |
| 229533_x_at  | zinc finger protein 680                               | ZNF680              | 340252       |
| 242915_at    | zinc finger protein 682                               | ZNF682              | 91120        |
| 227132_at    | zinc finger protein 706                               | ZNF706              | 51123        |
| 242028_at    | zinc finger protein 709                               | ZNF709              | 163051       |
| 229986_at    | zinc finger protein 717                               | ZNF717              | ---          |
| 227952_at    | Zinc finger protein 718                               | ZNF718              | ---          |
| 228029_at    | zinc finger protein 721                               | ZNF721              | 170960       |
| 225848_at    | zinc finger protein 746                               | ZNF746              | 155061       |
| 213659_at    | zinc finger protein 75 (D8C6)                         | ZNF75               | 7626         |
| 214813_at    | zinc finger protein 75 (D8C6)                         | ZNF75               | 7626         |
| 1553225_s_at | zinc finger protein 75 (D8C6)                         | ZNF75               | 7626         |
| 227670_at    | zinc finger protein 75a                               | ZNF75A              | 7627         |
| 1558943_x_at | zinc finger protein 765                               | ZNF765              | 91661        |
| 1558942_at   | zinc finger protein 765                               | ZNF765              | 91661        |
| 227284_at    | zinc finger protein 766                               | ZNF766              | 90321        |
| 219627_at    | zinc finger family member 767                         | ZNF767              | 79970        |
| 225517_at    | zinc finger protein 770                               | ZNF770              | 54989        |
| 215570_s_at  | zinc finger protein 780B /// zinc finger protein 780A | ZNF780A /// ZNF780B | 163131 /// 1 |
| 1554770_x_at | zinc finger protein 785                               | ZNF785              | 146540       |
| 239083_at    | zinc finger protein 786                               | ZNF786              | 136051       |
| 227101_at    | zinc finger protein 800                               | ZNF800              | 168850       |
| 238148_s_at  | zinc finger protein 818                               | ZNF818              | 390963       |
| 221645_s_at  | zinc finger protein 83                                | ZNF83               | 55769        |
| 204453_at    | zinc finger protein 84                                | ZNF84               | 7637         |
| 206572_x_at  | zinc finger protein 85                                | ZNF85               | 7639         |
| 236128_at    | zinc finger protein 91                                | ZNF91               | 7644         |
| 235170_at    | zinc finger protein 92                                | ZNF92               | 168374       |
| 1569241_a_at | zinc finger protein 93                                | ZNF93               | 81931        |
| 1553885_x_at | zinc finger protein 99                                | ZNF99               | 7652         |
| 201541_s_at  | zinc finger, HIT type 1                               | ZNHIT1              | 10467        |
| 226261_at    | zinc and ring finger 2                                | ZNRF2               | 223082       |
| 226360_at    | zinc and ring finger 3                                | ZNRF3               | 84133        |
| 207021_at    | zona pellucida binding protein                        | ZPBP                | 11055        |
| 1561969_at   | zona pellucida-like domain containing 1               | ZPLD1               | 131368       |
| 213097_s_at  | zuotin related factor 1                               | ZRF1                | 27000        |
| 206507_at    | zinc finger and SCAN domain containing 12             | ZSCAN12             | 9753         |
| 231188_at    | zinc finger and SCAN domain containing 2              | ZSCAN2              | 54993        |
| 226562_at    | zinc finger and SCAN domain containing 29             | ZSCAN29             | 146050       |
| 222606_at    | Zwilch, kinetochore associated, homolog (Drosophila)  | ZWILCH              | 55055        |
| 204026_s_at  | ZW10 interactor                                       | ZWINT               | 11130        |
| 230106_at    | ZXD family zinc finger C                              | ZXDC                | 79364        |
| 227918_s_at  | zyg-11 homolog B (C. elegans)                         | ZYG11B              | 79699        |
| 225338_at    | zyg-11 homolog B (C. elegans)                         | ZYG11B              | 79699        |
| 215706_x_at  | zyxin                                                 | ZYX                 | 7791         |
| 200808_s_at  | zyxin                                                 | ZYX                 | 7791         |
| 207190_at    | zinc finger, ZZ-type with EF-hand domain 1            | ZZEF1               | 23140        |

|              |                                                                                 |       |                  |
|--------------|---------------------------------------------------------------------------------|-------|------------------|
| 212601_at    | zinc finger, ZZ-type with EF-hand domain 1                                      | ZZEF1 | 23140            |
| 212893_at    | zinc finger, ZZ-type containing 3                                               | ZZZ3  | 26009            |
| 213256_at    | membrane-associated ring finger (C3HC4) 3                                       |       | 39144 100133609, |
| 218582_at    | membrane-associated ring finger (C3HC4) 5                                       |       | 39146 54708      |
| 201737_s_at  | membrane-associated ring finger (C3HC4) 6                                       |       | 39147 10299      |
| 215512_at    | membrane-associated ring finger (C3HC4) 6                                       |       | 39147 10299      |
| 201736_s_at  | membrane-associated ring finger (C3HC4) 6                                       |       | 39147 10299      |
| 202653_s_at  | membrane-associated ring finger (C3HC4) 7                                       |       | 39148 64844      |
| 200778_s_at  | septin 2                                                                        |       | 39327 4735       |
| 1554747_a_at | septin 2                                                                        |       | 39327 4735       |
| 1555526_a_at | septin 6                                                                        |       | 39331 23157      |
| 244508_at    | Septin 7                                                                        |       | 39332 989        |
| 208657_s_at  | septin 9                                                                        |       | 39334 10801      |
| 239076_at    | septin 13                                                                       |       | 39338 641977     |
| 200902_at    | 15 kDa selenoprotein                                                            |       | 39340 9403       |
| 235529_x_at  | Full-length cDNA clone CS0DI067YM20 of Placenta Cot 25-normalized of Homo :---  |       | ---              |
| 235964_x_at  | Full-length cDNA clone CS0DI067YM20 of Placenta Cot 25-normalized of Homo :---  |       | ---              |
| 213294_at    | Full-length cDNA clone CS0DK002YF13 of HeLa cells Cot 25-normalized of Homo --- |       | 5610             |
| 244434_at    | ---                                                                             | ---   | ---              |
| 231145_at    | Transcribed locus                                                               | ---   | ---              |
| 242005_at    | Transcribed locus                                                               | ---   | ---              |
| 234987_at    | Full-length cDNA clone CS0DI067YM20 of Placenta Cot 25-normalized of Homo :---  |       | ---              |
| 231688_at    | Transcribed locus                                                               | ---   | 4317             |
| 240655_at    | ---                                                                             | ---   | ---              |
| 243366_s_at  | Transcribed locus                                                               | ---   | ---              |
| 237332_at    | Transcribed locus                                                               | ---   | ---              |
| 1570136_at   | Homo sapiens, clone IMAGE:4179922, mRNA                                         | ---   | ---              |
| 1561713_at   | CDNA clone IMAGE:5269990                                                        | ---   | ---              |
| 242398_x_at  | Transcribed locus                                                               | ---   | ---              |
| 236034_at    | ---                                                                             | ---   | 285              |
| 238744_at    | Transcribed locus                                                               | ---   | ---              |
| 1556936_at   | Homo sapiens, clone IMAGE:5309572, mRNA                                         | ---   | ---              |
| 242881_x_at  | Clone HLS_IMAGE_626842 mRNA sequence                                            | ---   | ---              |
| 1562342_at   | MRNA; cDNA DKFZp667G1416 (from clone DKFZp667G1416)                             | ---   | ---              |
| 233784_at    | CDNA: FLJ22733 fis, clone HSI15907                                              | ---   | ---              |
| 243566_at    | Transcribed locus                                                               | ---   | ---              |
| 1562634_at   | Homo sapiens, clone IMAGE:5169164, mRNA                                         | ---   | ---              |
| 228792_at    | CDNA FLJ11602 fis, clone HEMBA1003908                                           | ---   | ---              |
| 243005_at    | Transcribed locus                                                               | ---   | ---              |
| 237185_at    | Transcribed locus                                                               | ---   | ---              |
| 1561143_at   | Full length insert cDNA clone ZD46F01                                           | ---   | ---              |
| 220729_at    | ---                                                                             | ---   | ---              |
| 227140_at    | CDNA FLJ11041 fis, clone PLACE1004405                                           | ---   | ---              |
| 235831_at    | Transcribed locus                                                               | ---   | ---              |
| 1562918_at   | CDNA clone IMAGE:4523522                                                        | ---   | ---              |
| 240985_at    | Transcribed locus                                                               | ---   | ---              |
| 243332_at    | Transcribed locus                                                               | ---   | ---              |
| 1564567_at   | CDNA: FLJ23224 fis, clone ADSU02206                                             | ---   | ---              |
| 238501_at    | Transcribed locus                                                               | ---   | ---              |
| 242715_at    | Transcribed locus                                                               | ---   | ---              |
| 239709_at    | Transcribed locus                                                               | ---   | ---              |
| 237301_at    | Transcribed locus                                                               | ---   | ---              |
| 1556884_a_at | CDNA clone IMAGE:5271996                                                        | ---   | ---              |
| 1561368_at   | Homo sapiens, clone IMAGE:5194369, mRNA                                         | ---   | ---              |
| 1553575_at   | ---                                                                             | ---   | 4541             |
| 1561692_at   | CDNA clone IMAGE:4828841                                                        | ---   | ---              |
| 241951_at    | Transcribed locus                                                               | ---   | ---              |
| 1566637_at   | MRNA; cDNA DKFZp761H2217 (from clone DKFZp761H2217)                             | ---   | ---              |
| 232538_at    | CDNA: FLJ23573 fis, clone LNG12520                                              | ---   | ---              |
| 243578_at    | Transcribed locus                                                               | ---   | ---              |
| 236164_at    | Transcribed locus                                                               | ---   | ---              |
| 243303_at    | CDNA FLJ40827 fis, clone TRACH2011500                                           | ---   | ---              |
| 239673_at    | Transcribed locus                                                               | ---   | ---              |

|              |                                                                             |     |            |
|--------------|-----------------------------------------------------------------------------|-----|------------|
| 242937_at    | ---                                                                         | --- | 3607       |
| 237548_at    | Transcribed locus                                                           | --- | ---        |
| 241186_at    | Transcribed locus                                                           | --- | ---        |
| 233364_s_at  | CDNA FLJ38472 fis, clone FEBRA2022148                                       | --- | ---        |
| 233788_at    | CDNA FLJ11617 fis, clone HEMBA1004045                                       | --- | ---        |
| 227769_at    | Transcribed locus                                                           | --- | ---        |
| 233757_x_at  | CDNA: FLJ23253 fis, clone COL04706                                          | --- | ---        |
| 1561415_at   | CDNA FLJ35886 fis, clone TESTI2009091                                       | --- | ---        |
| 243462_s_at  | Transcribed locus                                                           | --- | ---        |
| 241808_at    | CDNA FLJ36977 fis, clone BRACE2006344                                       | --- | ---        |
| 236353_at    | CDNA FLJ43467 fis, clone OCBBF2036752                                       | --- | ---        |
| 244503_at    | Transcribed locus                                                           | --- | ---        |
| 1560144_at   | CDNA clone IMAGE:5271374                                                    | --- | ---        |
| 238318_at    | ---                                                                         | --- | ---        |
| 228315_at    | CDNA clone IMAGE:5261213                                                    | --- | ---        |
| 1564841_at   | MRNA; cDNA DKFZp761G0323 (from clone DKFZp761G0323)                         | --- | ---        |
| 228655_at    | Unknown mRNA sequence                                                       | --- | ---        |
| 240433_x_at  | CDNA clone IMAGE:4811412                                                    | --- | ---        |
| 1561639_at   | Full length insert cDNA clone YP51C12                                       | --- | ---        |
| 225611_at    | ---                                                                         | --- | 100128443, |
| 233513_at    | CDNA FLJ12999 fis, clone NT2RP3000324                                       | --- | ---        |
| 1559889_at   | Homo sapiens, clone IMAGE:3932221, mRNA                                     | --- | ---        |
| 240128_at    | Transcribed locus                                                           | --- | ---        |
| 1562933_at   | CDNA clone IMAGE:4794367                                                    | --- | ---        |
| 239025_at    | Clone HLS_IMAGE_1554917 mRNA sequence                                       | --- | ---        |
| 1561229_at   | CDNA clone IMAGE:4824292                                                    | --- | ---        |
| 229951_x_at  | Transcribed locus                                                           | --- | ---        |
| 241834_at    | Full-length cDNA clone CS0DC013YI04 of Neuroblastoma Cot 25-normalized of t | --- | 3653       |
| 1558019_at   | Homo sapiens, clone IMAGE:4732650, mRNA                                     | --- | ---        |
| 238174_at    | Transcribed locus                                                           | --- | ---        |
| 224080_at    | ---                                                                         | --- | ---        |
| 243627_at    | Transcribed locus                                                           | --- | ---        |
| 234137_s_at  | CDNA FLJ11960 fis, clone HEMBB1001008                                       | --- | ---        |
| 1560034_a_at | MRNA; cDNA DKFZp313E1515 (from clone DKFZp313E1515)                         | --- | ---        |
| 230383_x_at  | Transcribed locus                                                           | --- | ---        |
| 236202_at    | Transcribed locus                                                           | --- | ---        |
| 1569609_at   | CDNA clone IMAGE:4422069                                                    | --- | ---        |
| 240188_at    | ---                                                                         | --- | ---        |
| 243504_at    | Transcribed locus                                                           | --- | ---        |
| 1562755_at   | CDNA clone IMAGE:5286775                                                    | --- | ---        |
| 231031_at    | ---                                                                         | --- | 654466     |
| 1561212_at   | CDNA clone IMAGE:4826097                                                    | --- | ---        |
| 230336_at    | Transcribed locus                                                           | --- | ---        |
| 220870_at    | ---                                                                         | --- | ---        |
| 1560391_at   | MRNA; cDNA DKFZp667D1513 (from clone DKFZp667D1513)                         | --- | ---        |
| 1558496_at   | Homo sapiens, clone IMAGE:5167229, mRNA                                     | --- | ---        |
| 1555929_s_at | Transcribed locus                                                           | --- | ---        |
| 242007_at    | Primary neuroblastoma cDNA, clone:Nbla03526, full insert sequence           | --- | ---        |
| 1562656_at   | CDNA clone IMAGE:5248626                                                    | --- | ---        |
| 227499_at    | ---                                                                         | --- | ---        |
| 242310_at    | Transcribed locus                                                           | --- | ---        |
| 216728_at    | MRNA; cDNA DKFZp434D179 (from clone DKFZp434D179)                           | --- | ---        |
| 1570155_at   | Homo sapiens, clone IMAGE:4427279, mRNA                                     | --- | ---        |
| 243983_at    | Transcribed locus                                                           | --- | ---        |
| 243007_at    | CDNA FLJ43181 fis, clone FCBBF3016134                                       | --- | ---        |
| 239664_at    | Transcribed locus                                                           | --- | ---        |
| 244359_s_at  | Clone HLS_IMAGE_1699118 mRNA sequence                                       | --- | ---        |
| 1560924_at   | CDNA FLJ33351 fis, clone BRACE2005063                                       | --- | ---        |
| 228731_at    | CDNA clone IMAGE:5273964                                                    | --- | ---        |
| 215962_at    | EST clone 22453 mariner transposon Hsmar1 sequence                          | --- | ---        |
| 1559835_at   | Homo sapiens, clone IMAGE:5213378, mRNA                                     | --- | ---        |
| 228562_at    | Transcribed locus                                                           | --- | ---        |
| 243780_at    | CDNA FLJ46553 fis, clone THYMU3038879                                       | --- | ---        |

|              |                                                                      |     |           |
|--------------|----------------------------------------------------------------------|-----|-----------|
| 231615_at    | Transcribed locus                                                    | --- | ---       |
| 235123_at    | Transcribed locus                                                    | --- | ---       |
| 237602_at    | Transcribed locus                                                    | --- | ---       |
| 215473_at    | Clone 23758 mRNA sequence                                            | --- | ---       |
| 237771_s_at  | Transcribed locus                                                    | --- | ---       |
| 227126_at    | Transcribed locus                                                    | --- | ---       |
| 238964_at    | Transcribed locus                                                    | --- | 55137     |
| 241653_x_at  | Transcribed locus                                                    | --- | ---       |
| 229131_at    | ---                                                                  | --- | ---       |
| 242532_at    | ---                                                                  | --- | ---       |
| 242488_at    | CDNA FLJ38396 fis, clone FEBRA2007957                                | --- | ---       |
| 240366_at    | Transcribed locus                                                    | --- | 100129562 |
| 1568872_at   | CDNA clone IMAGE:4823221                                             | --- | ---       |
| 242150_at    | Transcribed locus                                                    | --- | ---       |
| 236010_at    | Transcribed locus                                                    | --- | ---       |
| 244867_at    | Transcribed locus                                                    | --- | ---       |
| 241685_x_at  | Transcribed locus                                                    | --- | ---       |
| 228694_at    | Homo sapiens, clone IMAGE:3352913, mRNA                              | --- | ---       |
| 1561778_at   | MRNA upregulated during camptothecin-induced apoptosis of U937 cells | --- | ---       |
| 227462_at    | ---                                                                  | --- | 64167     |
| 244612_at    | ---                                                                  | --- | ---       |
| 1556649_at   | ---                                                                  | --- | ---       |
| 1559697_a_at | Full length insert cDNA clone YW24B11                                | --- | ---       |
| 1561004_at   | Full length insert cDNA clone YY74A01                                | --- | ---       |
| 241898_at    | Transcribed locus                                                    | --- | ---       |
| 244107_at    | ---                                                                  | --- | ---       |
| 1570623_at   | ---                                                                  | --- | ---       |
| 1560760_s_at | Homo sapiens, clone IMAGE:5587935, mRNA                              | --- | ---       |
| 232805_at    | CDNA FLJ11973 fis, clone HEMBB1001221                                | --- | ---       |
| 229629_at    | Transcribed locus                                                    | --- | ---       |
| 1555989_at   | Transcribed locus                                                    | --- | ---       |
| 1562332_at   | CDNA clone IMAGE:5302406                                             | --- | ---       |
| 243271_at    | Transcribed locus                                                    | --- | ---       |
| 1560025_at   | CDNA FLJ37325 fis, clone BRAMY2018295                                | --- | ---       |
| 1561856_at   | CDNA clone IMAGE:4792693                                             | --- | ---       |
| 234277_at    | ---                                                                  | --- | ---       |
| 1563038_at   | Homo sapiens, clone IMAGE:3917623, mRNA                              | --- | ---       |
| 242536_at    | Transcribed locus                                                    | --- | ---       |
| 221144_at    | ---                                                                  | --- | ---       |
| 243232_at    | Transcribed locus                                                    | --- | ---       |
| 233118_at    | CDNA: FLJ21358 fis, clone COL02842                                   | --- | ---       |
| 1569736_at   | CDNA clone IMAGE:5264099                                             | --- | ---       |
| 228273_at    | Transcribed locus                                                    | --- | ---       |
| 240016_at    | Transcribed locus                                                    | --- | ---       |
| 1566166_at   | MRNA; cDNA DKFZp313H2139 (from clone DKFZp313H2139)                  | --- | ---       |
| 1562828_at   | CDNA clone IMAGE:4799094                                             | --- | ---       |
| 1560346_at   | MRNA; cDNA DKFZp564D032 (from clone DKFZp564D032)                    | --- | ---       |
| 230764_at    | CDNA FLJ30669 fis, clone FCBBF1000684                                | --- | ---       |
| 244579_at    | Transcribed locus                                                    | --- | ---       |
| 243646_at    | ---                                                                  | --- | ---       |
| 240217_s_at  | Transcribed locus                                                    | --- | ---       |
| 244097_at    | ---                                                                  | --- | 1380      |
| 1556331_a_at | CDNA clone IMAGE:5259142                                             | --- | ---       |
| 243888_at    | Transcribed locus                                                    | --- | ---       |
| 227646_at    | CDNA FLJ39389 fis, clone PLACE6003621                                | --- | 1879      |
| 1566763_at   | CDNA clone IMAGE:5277680                                             | --- | ---       |
| 239516_at    | Transcribed locus                                                    | --- | ---       |
| 233932_at    | EST from clone 1206988, full insert                                  | --- | ---       |
| 221076_at    | ---                                                                  | --- | ---       |
| 235693_at    | Transcribed locus                                                    | --- | ---       |
| 230300_at    | CDNA FLJ42315 fis, clone TRACH2019661                                | --- | ---       |
| 1559804_at   | CDNA FLJ36051 fis, clone TESTI2018083                                | --- | ---       |
| 1558122_s_at | CDNA FLJ39178 fis, clone OCBBF2004104                                | --- | ---       |

|              |                                                                                |     |        |
|--------------|--------------------------------------------------------------------------------|-----|--------|
| 227458_at    | ---                                                                            | --- | ---    |
| 239333_x_at  | CDNA FLJ30541 fis, clone BRAWH2001355                                          | --- | ---    |
| 231464_at    | Transcribed locus                                                              | --- | ---    |
| 236125_at    | CDNA FLJ31332 fis, clone MAMGL1000096                                          | --- | ---    |
| 1566032_at   | MRNA; cDNA DKFZp686J0929 (from clone DKFZp686J0929)                            | --- | ---    |
| 227934_at    | ---                                                                            | --- | 3841   |
| 1564851_at   | CDNA: FLJ20951 fis, clone ADSE01942                                            | --- | ---    |
| 224081_at    | ---                                                                            | --- | ---    |
| 1570269_at   | Homo sapiens, clone IMAGE:4700331, mRNA                                        | --- | ---    |
| 243278_at    | Transcribed locus                                                              | --- | 93986  |
| 1557029_at   | CDNA clone IMAGE:4822878                                                       | --- | ---    |
| 244094_at    | Transcribed locus                                                              | --- | ---    |
| 1560500_at   | CDNA clone IMAGE:5299346                                                       | --- | ---    |
| 242777_at    | Transcribed locus                                                              | --- | ---    |
| 1561624_at   | CDNA clone IMAGE:5270007                                                       | --- | ---    |
| 1561417_x_at | CDNA FLJ35886 fis, clone TESTI2009091                                          | --- | ---    |
| 1555893_at   | CDNA clone IMAGE:5267578                                                       | --- | ---    |
| 1562111_at   | CDNA clone IMAGE:5303859                                                       | --- | ---    |
| 242579_at    | Transcribed locus                                                              | --- | 658    |
| 233282_at    | CDNA FLJ13333 fis, clone OVARC1001828                                          | --- | ---    |
| 233793_at    | CDNA FLJ11668 fis, clone HEMBA1004705                                          | --- | ---    |
| 233205_at    | Ntera2D1 cell line mRNA containing L1 retroposon, clone P7                     | --- | ---    |
| 241858_at    | CDNA FLJ44346 fis, clone TRACH3005808, highly similar to Homo sapiens p150     | --- | ---    |
| 242468_at    | ---                                                                            | --- | ---    |
| 213803_at    | Transcribed locus                                                              | --- | 3837   |
| 243032_at    | Transcribed locus                                                              | --- | ---    |
| 226223_at    | Transcribed locus                                                              | --- | ---    |
| 232833_at    | Clone 24425 mRNA sequence                                                      | --- | ---    |
| 217132_at    | Clone 24587 mRNA sequence                                                      | --- | ---    |
| 235118_at    | CDNA clone IMAGE:4811412                                                       | --- | ---    |
| 231482_at    | MRNA; cDNA DKFZp781G0123 (from clone DKFZp781G0123)                            | --- | ---    |
| 1563941_at   | ---                                                                            | --- | ---    |
| 233365_at    | CDNA FLJ12285 fis, clone MAMMA1001764                                          | --- | ---    |
| 1567101_at   | Full length insert cDNA clone YB38D04                                          | --- | ---    |
| 241745_at    | Full-length cDNA clone CS0DI029YI16 of Placenta Cot 25-normalized of Homo sa   | --- | ---    |
| 1557772_at   | CDNA clone IMAGE:4826031                                                       | --- | ---    |
| 238530_at    | ---                                                                            | --- | 23530  |
| 242333_at    | Transcribed locus                                                              | --- | ---    |
| 1557645_at   | CDNA clone IMAGE:4826526                                                       | --- | ---    |
| 234753_x_at  | ---                                                                            | --- | ---    |
| 1553498_at   | ---                                                                            | --- | ---    |
| 234331_s_at  | ---                                                                            | --- | 151354 |
| 240649_at    | Transcribed locus                                                              | --- | ---    |
| 230201_at    | Transcribed locus                                                              | --- | ---    |
| 1561705_at   | CDNA clone IMAGE:5272626                                                       | --- | ---    |
| 230003_at    | Transcribed locus                                                              | --- | ---    |
| 1569601_at   | CDNA clone IMAGE:3935451                                                       | --- | ---    |
| 243824_at    | Homo sapiens, clone IMAGE:5213378, mRNA                                        | --- | ---    |
| 235215_at    | Transcribed locus                                                              | --- | 2072   |
| 229757_at    | Transcribed locus                                                              | --- | ---    |
| 227779_at    | Transcribed locus, weakly similar to XP_001070120.1 hypothetical protein [Ratt | --- | 641700 |
| 243907_at    | Transcribed locus                                                              | --- | ---    |
| 227524_at    | ---                                                                            | --- | ---    |
| 239292_at    | Transcribed locus                                                              | --- | ---    |
| 242899_at    | MRNA; cDNA DKFZp313B1017 (from clone DKFZp313B1017)                            | --- | ---    |
| 220874_at    | ---                                                                            | --- | ---    |
| 241240_at    | Transcribed locus                                                              | --- | ---    |
| 1564760_at   | CDNA clone IMAGE:4694535                                                       | --- | ---    |
| 1566862_at   | CDNA clone IMAGE:5310996                                                       | --- | ---    |
| 236409_at    | Transcribed locus                                                              | --- | ---    |
| 235919_at    | Transcribed locus                                                              | --- | ---    |
| 238146_at    | Transcribed locus                                                              | --- | ---    |
| 238632_at    | Full length insert cDNA clone ZD51F08                                          | --- | ---    |

|              |                                                                                |     |           |
|--------------|--------------------------------------------------------------------------------|-----|-----------|
| 232773_at    | CDNA: FLJ21440 fis, clone COL04389                                             | --- | ---       |
| 233401_at    | CDNA FLJ11892 fis, clone HEMBA1007281                                          | --- | ---       |
| 1559514_at   | CDNA FLJ37869 fis, clone BRSSN2017422                                          | --- | 100132077 |
| 232800_at    | PNAS-130                                                                       | --- | ---       |
| 228826_at    | Homo sapiens, clone IMAGE:5215917, mRNA                                        | --- | ---       |
| 228780_at    | MRNA, clone ICRFp507B0451                                                      | --- | ---       |
| 1561938_at   | MRNA; cDNA DKFZp313A1935 (from clone DKFZp313A1935)                            | --- | ---       |
| 1562880_at   | CDNA clone IMAGE:5297280                                                       | --- | ---       |
| 1562476_at   | MRNA; cDNA DKFZp313C2339 (from clone DKFZp313C2339)                            | --- | ---       |
| 229530_at    | CDNA clone IMAGE:5302158                                                       | --- | 2982      |
| 236451_at    | CDNA FLJ14635 fis, clone NT2RP2001196                                          | --- | ---       |
| 234015_at    | CDNA FLJ10239 fis, clone HEMBB1000589                                          | --- | ---       |
| 234104_at    | CDNA FLJ10198 fis, clone HEMBA1004806                                          | --- | ---       |
| 1557433_at   | CDNA FLJ38907 fis, clone NT2NE2005276                                          | --- | ---       |
| 230791_at    | CDNA FLJ12033 fis, clone HEMBB1001899                                          | --- | ---       |
| 241218_at    | Homo sapiens, clone IMAGE:5761701, mRNA                                        | --- | ---       |
| 1559723_s_at | CDNA clone IMAGE:4830182                                                       | --- | ---       |
| 1561242_at   | CDNA clone IMAGE:5275263                                                       | --- | ---       |
| 1561363_a_at | CDNA FLJ36285 fis, clone THYMU2003470                                          | --- | ---       |
| 242605_at    | Transcribed locus                                                              | --- | ---       |
| 242681_at    | Transcribed locus                                                              | --- | ---       |
| 233455_at    | MRNA; cDNA DKFZp564H072 (from clone DKFZp564H072)                              | --- | ---       |
| 240636_at    | Transcribed locus                                                              | --- | ---       |
| 216211_at    | MRNA; cDNA DKFZp564A023 (from clone DKFZp564A023)                              | --- | ---       |
| 227663_at    | CDNA FLJ40901 fis, clone UTERU2003704                                          | --- | ---       |
| 229994_at    | CDNA FLJ39164 fis, clone OCBBF2002656                                          | --- | ---       |
| 216012_at    | Unidentified mRNA, partial sequence                                            | --- | ---       |
| 240204_at    | ---                                                                            | --- | 6638      |
| 239046_at    | Transcribed locus                                                              | --- | ---       |
| 240658_at    | Transcribed locus                                                              | --- | ---       |
| 232174_at    | CDNA: FLJ21635 fis, clone COL08233, highly similar to AF131819 Homo sapiens    | --- | ---       |
| 1562719_at   | CDNA clone IMAGE:5297905                                                       | --- | ---       |
| 244532_x_at  | Clone HLS_IMAGE_1699118 mRNA sequence                                          | --- | ---       |
| 232242_at    | CDNA clone IMAGE:5298411                                                       | --- | ---       |
| 1561905_at   | CDNA clone IMAGE:4820434                                                       | --- | ---       |
| 1570482_at   | Pp14356                                                                        | --- | ---       |
| 1570579_at   | CDNA clone IMAGE:5274593                                                       | --- | ---       |
| 1554220_a_at | Full-length cDNA clone CSODK005YB04 of HeLa cells Cot 25-normalized of Homc    | --- | ---       |
| 229506_at    | CDNA clone IMAGE:5263177                                                       | --- | ---       |
| 225123_at    | MRNA; cDNA DKFZp313B1017 (from clone DKFZp313B1017)                            | --- | ---       |
| 232715_at    | CDNA FLJ11544 fis, clone HEMBA1002826                                          | --- | ---       |
| 231239_at    | Transcribed locus                                                              | --- | ---       |
| 236068_s_at  | Transcribed locus                                                              | --- | ---       |
| 236740_at    | Transcribed locus                                                              | --- | ---       |
| 1561754_at   | Full length insert cDNA clone ZA88B06                                          | --- | ---       |
| 222970_at    | ---                                                                            | --- | ---       |
| 241291_at    | CDNA FLJ36657 fis, clone UTERU2001876                                          | --- | ---       |
| 226365_at    | CDNA FLJ40901 fis, clone UTERU2003704 /// Clone HLS_IMAGE_767345 mRNA          | --- | ---       |
| 1568919_at   | CDNA clone IMAGE:5266449                                                       | --- | ---       |
| 1561731_at   | CDNA clone IMAGE:5268630                                                       | --- | ---       |
| 242755_at    | ---                                                                            | --- | ---       |
| 234034_at    | MRNA; cDNA DKFZp761F052 (from clone DKFZp761F052)                              | --- | ---       |
| 237879_at    | ---                                                                            | --- | ---       |
| 237102_at    | Transcribed locus, strongly similar to XP_001145696.1 hypothetical protein [Pa | --- | ---       |
| 242597_at    | Transcribed locus                                                              | --- | ---       |
| 233548_at    | Clone IMAGE:35115, mRNA sequence                                               | --- | ---       |
| 241566_at    | ---                                                                            | --- | ---       |
| 1561017_at   | Full length insert cDNA clone YW28G08                                          | --- | ---       |
| 244275_at    | Transcribed locus                                                              | --- | ---       |
| 244114_x_at  | Clone HLS_IMAGE_1699118 mRNA sequence                                          | --- | ---       |
| 242766_at    | Homo sapiens, clone IMAGE:4102980, mRNA                                        | --- | ---       |
| 1559067_a_at | Transcribed locus                                                              | --- | ---       |
| 237096_at    | Transcribed locus                                                              | --- | ---       |

|              |                                                                            |     |           |
|--------------|----------------------------------------------------------------------------|-----|-----------|
| 233944_at    | CDNA FLJ12079 fis, clone HEMBB1002458                                      | --- | ---       |
| 1563217_at   | CDNA clone IMAGE:5299732                                                   | --- | ---       |
| 242014_at    | Transcribed locus                                                          | --- | ---       |
| 236733_at    | Transcribed locus                                                          | --- | ---       |
| 1560258_a_at | Homo sapiens, clone IMAGE:5590287, mRNA                                    | --- | ---       |
| 214019_at    | ---                                                                        | --- | ---       |
| 1556834_at   | CDNA clone IMAGE:5296106                                                   | --- | ---       |
| 241222_at    | ---                                                                        | --- | ---       |
| 240131_at    | Transcribed locus                                                          | --- | ---       |
| 217052_x_at  | ---                                                                        | --- | ---       |
| 230376_at    | Transcribed locus                                                          | --- | ---       |
| 220878_at    | ---                                                                        | --- | ---       |
| 1568920_at   | CDNA clone IMAGE:5261128                                                   | --- | ---       |
| 1570181_a_at | Homo sapiens, clone IMAGE:3857181, mRNA                                    | --- | ---       |
| 1560495_at   | CDNA clone IMAGE:5729277                                                   | --- | ---       |
| 232738_at    | ---                                                                        | --- | ---       |
| 213106_at    | ---                                                                        | --- | 10396     |
| 216612_x_at  | ---                                                                        | --- | ---       |
| 1556935_at   | Full length insert cDNA clone YI44E03                                      | --- | ---       |
| 1559722_at   | CDNA clone IMAGE:4830182                                                   | --- | ---       |
| 239849_at    | Transcribed locus                                                          | --- | ---       |
| 242639_at    | Transcribed locus                                                          | --- | 79664     |
| 1569786_at   | CDNA clone IMAGE:4831083                                                   | --- | ---       |
| 1558801_at   | Homo sapiens, clone IMAGE:2900205, mRNA                                    | --- | ---       |
| 227776_at    | Transcribed locus                                                          | --- | 55331     |
| 215854_at    | CDNA FLJ11844 fis, clone HEMBA1006665                                      | --- | ---       |
| 233240_at    | CDNA FLJ10255 fis, clone HEMBB1000852                                      | --- | ---       |
| 1561255_at   | CDNA clone IMAGE:4827712                                                   | --- | ---       |
| 1563482_at   | MRNA; cDNA DKFZp451M0319 (from clone DKFZp451M0319)                        | --- | ---       |
| 234778_at    | CDNA: FLJ21377 fis, clone COL03255                                         | --- | ---       |
| 229167_at    | Full-length cDNA clone CSODF014YA22 of Fetal brain of Homo sapiens (human) | --- | ---       |
| 1562276_at   | CDNA clone IMAGE:4839037                                                   | --- | ---       |
| 1569041_at   | CDNA clone IMAGE:5262215                                                   | --- | ---       |
| 244723_at    | CDNA FLJ34659 fis, clone KIDNE2018863                                      | --- | 100129488 |
| 237171_at    | Transcribed locus                                                          | --- | ---       |
| 226831_at    | ---                                                                        | --- | 91137     |
| 240141_at    | ---                                                                        | --- | ---       |
| 227827_at    | CDNA clone IMAGE:4791597                                                   | --- | ---       |
| 1562861_at   | Homo sapiens, clone IMAGE:5195119, mRNA                                    | --- | ---       |
| 232808_at    | CDNA FLJ12293 fis, clone MAMMA1001815                                      | --- | ---       |
| 215801_at    | MRNA; cDNA DKFZp434G1615 (from clone DKFZp434G1615)                        | --- | ---       |
| 240914_at    | Transcribed locus                                                          | --- | ---       |
| 236005_at    | ---                                                                        | --- | ---       |
| 236989_at    | Transcribed locus                                                          | --- | ---       |
| 242052_at    | CDNA FLJ31445 fis, clone NT2NE2000864                                      | --- | ---       |
| 233246_at    | HSPC090                                                                    | --- | ---       |
| 226478_at    | CDNA FLJ34764 fis, clone NT2NE2002311                                      | --- | ---       |
| 234136_at    | CDNA FLJ13570 fis, clone PLACE1008392                                      | --- | ---       |
| 1569960_at   | CDNA clone MGC:42164 IMAGE:4799757                                         | --- | ---       |
| 239614_x_at  | Transcribed locus                                                          | --- | ---       |
| 1562288_at   | CDNA clone IMAGE:5262193                                                   | --- | ---       |
| 227921_at    | ---                                                                        | --- | ---       |
| 242286_at    | MRNA; cDNA DKFZp686F1745 (from clone DKFZp686F1745)                        | --- | 2903      |
| 230286_at    | Transcribed locus                                                          | --- | ---       |
| 229692_at    | Transcribed locus                                                          | --- | ---       |
| 243008_at    | Transcribed locus                                                          | --- | ---       |
| 241160_at    | Transcribed locus                                                          | --- | ---       |
| 241913_at    | Transcribed locus                                                          | --- | ---       |
| 236122_at    | Transcribed locus                                                          | --- | ---       |
| 240445_at    | Transcribed locus                                                          | --- | ---       |
| 216246_at    | ---                                                                        | --- | ---       |
| 242277_at    | Transcribed locus                                                          | --- | ---       |
| 238137_at    | Transcribed locus                                                          | --- | ---       |

|              |                                                     |     |        |
|--------------|-----------------------------------------------------|-----|--------|
| 234587_at    | ---                                                 | --- | ---    |
| 1558444_at   | CDNA FLJ35140 fis, clone PLACE6009524               | --- | ---    |
| 240831_at    | Transcribed locus                                   | --- | ---    |
| 220851_at    | ---                                                 | --- | ---    |
| 233858_at    | CDNA FLJ10149 fis, clone HEMBA1003380               | --- | ---    |
| 222322_at    | Transcribed locus                                   | --- | ---    |
| 235429_at    | Transcribed locus                                   | --- | ---    |
| 242142_at    | Transcribed locus                                   | --- | ---    |
| 240965_at    | ---                                                 | --- | ---    |
| 234067_at    | CDNA FLJ10214 fis, clone HEMBA1006530               | --- | ---    |
| 244454_at    | Transcribed locus                                   | --- | ---    |
| 225917_at    | CDNA FLJ43113 fis, clone CTONG2028208               | --- | ---    |
| 216121_at    | ---                                                 | --- | ---    |
| 234675_x_at  | CDNA: FLJ23566 fis, clone LNG10880                  | --- | ---    |
| 233005_at    | CDNA FLJ12602 fis, clone NT2RM4001437               | --- | ---    |
| 235613_at    | Transcribed locus                                   | --- | ---    |
| 1562827_at   | Homo sapiens, clone IMAGE:5167652, mRNA             | --- | ---    |
| 237650_at    | ---                                                 | --- | ---    |
| 1567576_at   | Trapped 3' terminal exon, clone C2C4                | --- | ---    |
| 237544_at    | Transcribed locus                                   | --- | ---    |
| 241859_at    | Transcribed locus                                   | --- | 5334   |
| 1557555_at   | CDNA FLJ12016 fis, clone HEMBB1001707               | --- | ---    |
| 230895_at    | ---                                                 | --- | 1404   |
| 1568647_at   | CDNA clone IMAGE:4426835                            | --- | ---    |
| 1569664_at   | Homo sapiens, clone IMAGE:5519764, mRNA             | --- | ---    |
| 244310_at    | Full length insert cDNA clone YU07D01               | --- | ---    |
| 1557875_at   | CDNA clone IMAGE:5267277                            | --- | ---    |
| 1562353_x_at | Homo sapiens, clone IMAGE:5760997, mRNA             | --- | ---    |
| 239200_at    | Transcribed locus                                   | --- | ---    |
| 1563075_s_at | Clone IMAGE:110987 mRNA sequence                    | --- | ---    |
| 1562610_at   | CDNA clone IMAGE:4830466                            | --- | ---    |
| 1570594_at   | CDNA clone IMAGE:4801054                            | --- | ---    |
| 240596_at    | Transcribed locus                                   | --- | ---    |
| 1563611_at   | MRNA; cDNA DKFZp761C037 (from clone DKFZp761C037)   | --- | ---    |
| 1557885_at   | CDNA clone IMAGE:5277293                            | --- | ---    |
| 233115_at    | CDNA FLJ12950 fis, clone NT2RP2005454               | --- | ---    |
| 233713_at    | CDNA FLJ12119 fis, clone MAMMA1000092               | --- | ---    |
| 236161_at    | Transcribed locus                                   | --- | ---    |
| 1561719_at   | CDNA clone IMAGE:5295194                            | --- | ---    |
| 234090_at    | CDNA FLJ14180 fis, clone NT2RP2003799               | --- | ---    |
| 239979_at    | ---                                                 | --- | ---    |
| 239340_at    | Transcribed locus                                   | --- | ---    |
| 237573_at    | Transcribed locus                                   | --- | ---    |
| 242134_at    | Transcribed locus                                   | --- | ---    |
| 1561214_at   | CDNA clone IMAGE:5271518                            | --- | ---    |
| 1562497_at   | CDNA FLJ38224 fis, clone FCBBF2003395               | --- | ---    |
| 239797_at    | Transcribed locus                                   | --- | ---    |
| 1563182_at   | CDNA clone IMAGE:4796641                            | --- | 130399 |
| 238281_at    | Transcribed locus                                   | --- | ---    |
| 1557239_at   | Full length insert cDNA clone YW25E05               | --- | 56987  |
| 232390_at    | MRNA; cDNA DKFZp761I1311 (from clone DKFZp761I1311) | --- | 4685   |
| 1562091_at   | CDNA clone IMAGE:5302310                            | --- | ---    |
| 1569680_at   | CDNA clone IMAGE:4288701                            | --- | ---    |
| 1560986_a_at | Full length insert cDNA clone YW21C01               | --- | ---    |
| 232569_at    | CDNA FLJ14193 fis, clone NT2RP3001115               | --- | ---    |
| 1561703_at   | CDNA clone IMAGE:5269594                            | --- | ---    |
| 234428_at    | MRNA; cDNA DKFZp564I1316 (from clone DKFZp564I1316) | --- | ---    |
| 227395_at    | CDNA FLJ38498 fis, clone FELNG2000241               | --- | ---    |
| 230314_at    | Transcribed locus                                   | --- | ---    |
| 216764_at    | CDNA: FLJ21538 fis, clone COL06151                  | --- | ---    |
| 231227_at    | Transcribed locus                                   | --- | ---    |
| 1567078_x_at | ---                                                 | --- | ---    |
| 1562596_at   | CDNA clone IMAGE:5767930                            | --- | ---    |



|              |                                                       |     |       |
|--------------|-------------------------------------------------------|-----|-------|
| 1560429_at   | Transcribed locus                                     | --- | ---   |
| 233779_x_at  | CDNA FLJ11984 fis, clone HEMBB1001348                 | --- | ---   |
| 1561672_at   | MRNA; cDNA DKFZp666D2410 (from clone DKFZp666D2410)   | --- | ---   |
| 235027_at    | CDNA FLJ41146 fis, clone BRACE2036900                 | --- | ---   |
| 241804_at    | Transcribed locus                                     | --- | ---   |
| 1560048_at   | CDNA FLJ30026 fis, clone 3NB692001123                 | --- | ---   |
| 234182_at    | ---                                                   | --- | ---   |
| 1557813_at   | Full length insert cDNA clone YB34C04                 | --- | ---   |
| 241956_at    | ---                                                   | --- | ---   |
| 1557861_at   | CDNA clone IMAGE:5302109                              | --- | ---   |
| 1568785_a_at | CDNA clone IMAGE:5272174                              | --- | ---   |
| 1566863_at   | CDNA clone IMAGE:5310996                              | --- | ---   |
| 233302_at    | CDNA FLJ10224 fis, clone HEMBB1000025                 | --- | ---   |
| 235018_at    | MRNA; cDNA DKFZp564E143 (from clone DKFZp564E143)     | --- | ---   |
| 235759_at    | Transcribed locus                                     | --- | ---   |
| 238073_at    | ---                                                   | --- | 1996  |
| 229261_at    | Transcribed locus                                     | --- | ---   |
| 240773_at    | Transcribed locus                                     | --- | ---   |
| 227221_at    | CDNA clone IMAGE:5261213                              | --- | ---   |
| 231057_at    | CDNA FLJ11991 fis, clone HEMBB1001424                 | --- | ---   |
| 243149_at    | Transcribed locus                                     | --- | ---   |
| 244779_at    | CDNA FLJ34038 fis, clone FCBBF2005645                 | --- | ---   |
| 215056_at    | Clone 23695 mRNA sequence                             | --- | ---   |
| 244125_at    | Transcribed locus                                     | --- | ---   |
| 1555364_at   | MRNA; cDNA DKFZp564K2216 (from clone DKFZp564K2216)   | --- | ---   |
| 1561690_at   | CDNA clone IMAGE:5303966                              | --- | ---   |
| 238370_x_at  | MRNA; cDNA DKFZp686L18111 (from clone DKFZp686L18111) | --- | 6146  |
| 243177_at    | ---                                                   | --- | ---   |
| 236395_at    | Transcribed locus                                     | --- | ---   |
| 232831_at    | CDNA FLJ11910 fis, clone HEMBB1000113                 | --- | ---   |
| 1564610_at   | CDNA FLJ25858 fis, clone TST09644                     | --- | ---   |
| 241365_at    | CDNA FLJ42259 fis, clone TKIDN2011289                 | --- | ---   |
| 243039_at    | ---                                                   | --- | ---   |
| 220691_at    | Clone HQ0097 PRO0097                                  | --- | ---   |
| 244792_at    | ---                                                   | --- | ---   |
| 241536_at    | Full length insert cDNA YO61A08                       | --- | ---   |
| 241818_at    | Transcribed locus                                     | --- | ---   |
| 242652_at    | Transcribed locus                                     | --- | ---   |
| 1556794_at   | CDNA FLJ33615 fis, clone BRAMY2018396                 | --- | ---   |
| 237667_at    | Transcribed locus                                     | --- | ---   |
| 215385_at    | CDNA FLJ12411 fis, clone MAMMA1002964                 | --- | ---   |
| 232064_at    | CDNA FLJ35001 fis, clone OCBBF2011887                 | --- | ---   |
| 236312_at    | Transcribed locus                                     | --- | ---   |
| 1561989_at   | ---                                                   | --- | ---   |
| 240895_at    | Transcribed locus                                     | --- | ---   |
| 233716_at    | CDNA FLJ12103 fis, clone HEMBB1002692                 | --- | ---   |
| 240324_at    | ---                                                   | --- | ---   |
| 237553_at    | Transcribed locus                                     | --- | ---   |
| 238348_x_at  | Transcribed locus                                     | --- | ---   |
| 234330_at    | CDNA FLJ14081 fis, clone HEMBB1002280                 | --- | ---   |
| 235183_at    | CDNA clone IMAGE:5312689                              | --- | ---   |
| 243635_at    | Transcribed locus                                     | --- | ---   |
| 239611_at    | Transcribed locus                                     | --- | ---   |
| 237537_at    | Transcribed locus                                     | --- | ---   |
| 210703_at    | ---                                                   | --- | ---   |
| 229281_at    | Transcribed locus                                     | --- | 64067 |
| 228732_at    | CDNA clone IMAGE:5273964                              | --- | ---   |
| 241473_at    | Transcribed locus                                     | --- | ---   |
| 236575_at    | CDNA clone IMAGE:4823793                              | --- | ---   |
| 216467_s_at  | CDNA FLJ41826 fis, clone NT2R12025564                 | --- | ---   |
| 242507_at    | CDNA FLJ35645 fis, clone SPLEN2012611                 | --- | ---   |
| 234563_at    | CDNA FLJ20788 fis, clone COL02074                     | --- | ---   |
| 239841_at    | Transcribed locus                                     | --- | ---   |

|              |                                                                                 |     |       |
|--------------|---------------------------------------------------------------------------------|-----|-------|
| 1560728_at   | MRNA; cDNA DKFZp666G069 (from clone DKFZp666G069)                               | --- | ---   |
| 241608_at    | Transcribed locus, weakly similar to XP_001083900.1 similar to zinc finger CCHC | --- | ---   |
| 233692_at    | CDNA: FLJ21275 fis, clone COL01827                                              | --- | ---   |
| 227497_at    | CDNA FLJ11723 fis, clone HEMBA1005314                                           | --- | ---   |
| 243908_at    | ---                                                                             | --- | ---   |
| 242756_at    | ---                                                                             | --- | ---   |
| 1565915_at   | Full length insert cDNA clone YR04D03                                           | --- | ---   |
| 243886_at    | ---                                                                             | --- | ---   |
| 233280_at    | CDNA FLJ13895 fis, clone THYRO1001673                                           | --- | ---   |
| 1562399_at   | CDNA clone IMAGE:5298700                                                        | --- | ---   |
| 1562794_at   | CDNA clone IMAGE:5259051                                                        | --- | ---   |
| 238431_at    | Transcribed locus                                                               | --- | ---   |
| 1568883_at   | Homo sapiens, Similar to KIAA1503 protein, clone IMAGE:5505326, mRNA            | --- | ---   |
| 215768_at    | MRNA; cDNA DKFZp564P016 (from clone DKFZp564P016)                               | --- | ---   |
| 239988_at    | Transcribed locus                                                               | --- | ---   |
| 236103_at    | Transcribed locus                                                               | --- | ---   |
| 242500_at    | Transcribed locus                                                               | --- | ---   |
| 243988_at    | Transcribed locus                                                               | --- | ---   |
| 226666_at    | MRNA; cDNA DKFZp564M243 (from clone DKFZp564M243)                               | --- | 23002 |
| 241770_x_at  | Transcribed locus                                                               | --- | ---   |
| 235363_at    | Transcribed locus                                                               | --- | ---   |
| 233976_at    | Transcribed locus                                                               | --- | ---   |
| 227545_at    | Transcribed locus                                                               | --- | ---   |
| 1569661_at   | CDNA clone IMAGE:5260324                                                        | --- | ---   |
| 1561364_at   | CDNA clone IMAGE:4797817                                                        | --- | ---   |
| 240279_at    | ---                                                                             | --- | ---   |
| 227585_at    | ---                                                                             | --- | ---   |
| 235264_at    | Transcribed locus                                                               | --- | 29915 |
| 1569344_a_at | Homo sapiens, clone IMAGE:4044872, mRNA                                         | --- | ---   |
| 226362_at    | Clone HLS_IMAGE_767345 mRNA sequence                                            | --- | ---   |
| 232978_at    | Clone IMAGE:27725, mRNA sequence                                                | --- | ---   |
| 226773_at    | MRNA (clone ICRFp50711077)                                                      | --- | ---   |
| 234074_at    | CDNA FLJ10946 fis, clone PLACE1000005                                           | --- | ---   |
| 243920_x_at  | MRNA; cDNA DKFZp686I19109 (from clone DKFZp686I19109)                           | --- | ---   |
| 1562850_at   | CDNA clone IMAGE:5742601                                                        | --- | ---   |
| 217363_x_at  | ---                                                                             | --- | ---   |
| 237184_at    | ---                                                                             | --- | ---   |
| 1563316_at   | Homo sapiens, clone IMAGE:5748207, mRNA                                         | --- | ---   |
| 242046_at    | Transcribed locus                                                               | --- | ---   |
| 1557843_at   | CDNA clone IMAGE:5298708                                                        | --- | ---   |
| 238907_at    | Transcribed locus                                                               | --- | ---   |
| 1559336_at   | Homo sapiens, clone IMAGE:4714787                                               | --- | ---   |
| 1557240_a_at | Full length insert cDNA clone YW25E05                                           | --- | ---   |
| 1570176_at   | Homo sapiens, clone IMAGE:4183253, mRNA                                         | --- | ---   |
| 241484_x_at  | ---                                                                             | --- | ---   |
| 244241_x_at  | Transcribed locus                                                               | --- | ---   |
| 216871_at    | ---                                                                             | --- | ---   |
| 240690_at    | ---                                                                             | --- | ---   |
| 230312_at    | Transcribed locus                                                               | --- | ---   |
| 232793_at    | Primary neuroblastoma cDNA, clone:Nbla04171, full insert sequence               | --- | ---   |
| 239718_at    | CDNA FLJ42310 fis, clone TRACH2007733                                           | --- | ---   |
| 241970_at    | Transcribed locus                                                               | --- | ---   |
| 1559806_at   | Homo sapiens, clone IMAGE:5166543, mRNA                                         | --- | ---   |
| 242593_at    | Transcribed locus                                                               | --- | ---   |
| 240450_at    | Transcribed locus                                                               | --- | ---   |
| 242819_at    | ---                                                                             | --- | ---   |
| 237953_at    | ---                                                                             | --- | ---   |
| 244303_at    | Transcribed locus                                                               | --- | ---   |
| 242674_at    | CDNA FLJ34183 fis, clone FCBBF3016987                                           | --- | ---   |
| 242616_at    | Transcribed locus                                                               | --- | ---   |
| 1560776_at   | CDNA FLJ12188 fis, clone MAMMA1000839                                           | --- | ---   |
| 1566284_at   | PA4=candidate oncogene {3' region} [human, HEN-16, HEN-16T transformed en       | --- | ---   |
| 241255_at    | ---                                                                             | --- | ---   |

|              |                                                                          |     |           |
|--------------|--------------------------------------------------------------------------|-----|-----------|
| 238876_at    | CDNA clone IMAGE:6165570                                                 | --- | ---       |
| 1555925_at   | CDNA FLJ30680 fis, clone FCBBF2000123                                    | --- | ---       |
| 1564767_at   | CDNA: FLJ20928 fis, clone ADSE01074                                      | --- | ---       |
| 1560661_x_at | ---                                                                      | --- | ---       |
| 234087_at    | ---                                                                      | --- | ---       |
| 240015_at    | Transcribed locus                                                        | --- | ---       |
| 1566695_at   | CDNA clone IMAGE:5289071                                                 | --- | ---       |
| 240538_at    | Transcribed locus                                                        | --- | ---       |
| 234219_at    | CDNA: FLJ21345 fis, clone COL02694                                       | --- | ---       |
| 216527_at    | CDNA FLJ46556 fis, clone THYMU3039807                                    | --- | ---       |
| 216170_at    | CDNA: FLJ21618 fis, clone COL07487                                       | --- | ---       |
| 234389_x_at  | ---                                                                      | --- | ---       |
| 238967_at    | Transcribed locus                                                        | --- | ---       |
| 242680_at    | Transcribed locus                                                        | --- | ---       |
| 237514_at    | CDNA clone IMAGE:5267328                                                 | --- | ---       |
| 1562474_at   | ---                                                                      | --- | ---       |
| 239649_at    | ---                                                                      | --- | ---       |
| 235764_at    | Transcribed locus                                                        | --- | ---       |
| 216828_at    | ---                                                                      | --- | ---       |
| 1561453_at   | CDNA clone IMAGE:5277839                                                 | --- | ---       |
| 1569539_at   | CDNA clone IMAGE:5285294                                                 | --- | ---       |
| 240341_at    | Transcribed locus                                                        | --- | ---       |
| 242769_at    | Transcribed locus                                                        | --- | ---       |
| 242216_at    | Transcribed locus                                                        | --- | ---       |
| 1562940_at   | CDNA clone IMAGE:5301683                                                 | --- | ---       |
| 242906_at    | MRNA; cDNA DKFZp313B1017 (from clone DKFZp313B1017)                      | --- | ---       |
| 241262_at    | Transcribed locus                                                        | --- | ---       |
| 235274_at    | Transcribed locus                                                        | --- | ---       |
| 242464_at    | Transcribed locus                                                        | --- | ---       |
| 236772_s_at  | Transcribed locus                                                        | --- | ---       |
| 1557584_at   | CDNA clone IMAGE:5262422                                                 | --- | ---       |
| 236251_at    | Transcribed locus                                                        | --- | ---       |
| 215303_at    | Clones 24632 and 24634 mRNA sequence                                     | --- | 9201      |
| 240861_at    | ---                                                                      | --- | ---       |
| 222249_at    | KIAA1651 protein                                                         | --- | ---       |
| 228218_at    | CDNA clone IMAGE:5284125                                                 | --- | ---       |
| 241030_at    | ---                                                                      | --- | ---       |
| 227630_at    | CDNA FLJ34250 fis, clone FCBBF4000529                                    | --- | ---       |
| 229317_at    | ---                                                                      | --- | 3841      |
| 242801_at    | Transcribed locus                                                        | --- | ---       |
| 227533_at    | Transcribed locus                                                        | --- | ---       |
| 242619_x_at  | ---                                                                      | --- | ---       |
| 1560118_at   | CDNA FLJ14172 fis, clone NT2RP2002677                                    | --- | ---       |
| 1564378_a_at | CDNA: FLJ21448 fis, clone COL04473                                       | --- | ---       |
| 212608_s_at  | AF034176 Human mRNA (Tripodis and Ragoussis) Homo sapiens cDNA clone ntc | --- | ---       |
| 1555014_x_at | OK/SW-cl.92                                                              | --- | ---       |
| 227234_at    | CDNA FLJ32177 fis, clone PLACE6001294                                    | --- | 100132815 |
| 233133_at    | Clone 24993 mRNA sequence                                                | --- | ---       |
| 1563032_at   | CDNA clone IMAGE:5311737                                                 | --- | ---       |
| 243673_at    | Transcribed locus                                                        | --- | ---       |
| 1561196_at   | CDNA clone IMAGE:4827713                                                 | --- | ---       |
| 241719_at    | Transcribed locus                                                        | --- | ---       |
| 215545_at    | ---                                                                      | --- | ---       |
| 232541_at    | CDNA FLJ20099 fis, clone COL04544                                        | --- | ---       |
| 227476_at    | ---                                                                      | --- | ---       |
| 244340_x_at  | ---                                                                      | --- | ---       |
| 1562642_at   | CDNA clone IMAGE:5288897                                                 | --- | ---       |
| 232679_at    | CDNA clone IMAGE:5299000                                                 | --- | ---       |
| 240783_at    | Transcribed locus                                                        | --- | ---       |
| 241184_x_at  | Transcribed locus                                                        | --- | ---       |
| 239134_at    | Transcribed locus                                                        | --- | ---       |
| 1560525_at   | Homo sapiens, clone IMAGE:4723630, mRNA                                  | --- | ---       |
| 1563138_at   | ---                                                                      | --- | ---       |

|              |                                                                            |     |           |
|--------------|----------------------------------------------------------------------------|-----|-----------|
| 243343_at    | Transcribed locus                                                          | --- | ---       |
| 1560517_s_at | Homo sapiens, clone IMAGE:5222445, mRNA                                    | --- | ---       |
| 1557025_a_at | CDNA clone IMAGE:4799771                                                   | --- | ---       |
| 238393_at    | Transcribed locus                                                          | --- | ---       |
| 1570622_at   | Clone FLB4630                                                              | --- | ---       |
| 242239_at    | CDNA clone IMAGE:5314281                                                   | --- | ---       |
| 241928_at    | Transcribed locus                                                          | --- | ---       |
| 241226_at    | Transcribed locus                                                          | --- | ---       |
| 237165_at    | ---                                                                        | --- | ---       |
| 1563118_at   | CDNA: FLJ20923 fis, clone ADSE00893                                        | --- | ---       |
| 222302_at    | ---                                                                        | --- | ---       |
| 1570205_at   | CDNA clone IMAGE:4794628                                                   | --- | ---       |
| 231616_at    | Transcribed locus                                                          | --- | ---       |
| 231095_at    | CDNA FLJ42857 fis, clone BRHIP2009340                                      | --- | ---       |
| 233263_at    | CDNA FLJ12236 fis, clone MAMMA1001244                                      | --- | ---       |
| 229823_at    | Transcribed locus                                                          | --- | ---       |
| 234009_at    | CDNA FLJ13777 fis, clone PLACE4000392                                      | --- | ---       |
| 1561525_at   | CDNA clone IMAGE:5258895                                                   | --- | ---       |
| 1561411_at   | Homo sapiens, clone IMAGE:5583320, mRNA                                    | --- | ---       |
| 1554225_a_at | CDNA clone IMAGE:4794631                                                   | --- | ---       |
| 244368_x_at  | MRNA; cDNA DKFZp451K063 (from clone DKFZp451K063)                          | --- | ---       |
| 240105_at    | Transcribed locus                                                          | --- | ---       |
| 235152_at    | Homo sapiens, clone IMAGE:5218412, mRNA                                    | --- | ---       |
| 237083_at    | Transcribed locus                                                          | --- | ---       |
| 238673_at    | Transcribed locus                                                          | --- | 401474    |
| 1562925_at   | CDNA clone IMAGE:3625232                                                   | --- | ---       |
| 234132_at    | CDNA FLJ11769 fis, clone HEMBA1005755                                      | --- | ---       |
| 1560659_at   | ---                                                                        | --- | ---       |
| 1568660_a_at | CDNA clone IMAGE:5272469                                                   | --- | ---       |
| 233853_at    | MRNA; cDNA DKFZp564C0170 (from clone DKFZp564C0170)                        | --- | ---       |
| 242535_at    | Transcribed locus                                                          | --- | ---       |
| 1553979_at   | Homo sapiens, clone IMAGE:3906992, mRNA                                    | --- | ---       |
| 1569311_at   | Homo sapiens, clone IMAGE:5557598, mRNA                                    | --- | ---       |
| 1562420_at   | CDNA clone IMAGE:5276673                                                   | --- | ---       |
| 242343_x_at  | ---                                                                        | --- | ---       |
| 243012_at    | Transcribed locus                                                          | --- | ---       |
| 233194_at    | MRNA; cDNA DKFZp434B1023 (from clone DKFZp434B1023)                        | --- | ---       |
| 231055_at    | Transcribed locus                                                          | --- | ---       |
| 1560888_x_at | Full length insert cDNA clone ZC40A10                                      | --- | ---       |
| 212605_s_at  | AF034176 Human mRNA (Tripodis and Ragoussis) Homo sapiens cDNA clone ntc   | --- | ---       |
| 1563706_at   | MRNA; cDNA DKFZp313B1235 (from clone DKFZp313B1235)                        | --- | ---       |
| 243150_at    | Transcribed locus                                                          | --- | ---       |
| 1562514_at   | CDNA clone IMAGE:5295326                                                   | --- | ---       |
| 1561489_at   | CDNA clone IMAGE:5541269                                                   | --- | ---       |
| 240262_at    | ---                                                                        | --- | ---       |
| 238161_at    | Transcribed locus                                                          | --- | ---       |
| 231513_at    | Transcribed locus                                                          | --- | ---       |
| 1566549_at   | MRNA; cDNA DKFZp564C1382 (from clone DKFZp564C1382)                        | --- | ---       |
| 228390_at    | CDNA clone IMAGE:5259272                                                   | --- | ---       |
| 235017_s_at  | MRNA; cDNA DKFZp564E143 (from clone DKFZp564E143)                          | --- | ---       |
| 234081_at    | CDNA FLJ11986 fis, clone HEMBB1001364                                      | --- | ---       |
| 242380_at    | Transcribed locus                                                          | --- | ---       |
| 1570628_at   | Homo sapiens, clone IMAGE:4401081, mRNA                                    | --- | ---       |
| 241179_at    | Transcribed locus                                                          | --- | ---       |
| 244236_at    | ---                                                                        | --- | ---       |
| 1562086_at   | CDNA clone IMAGE:5263207                                                   | --- | ---       |
| 243071_at    | Transcribed locus                                                          | --- | ---       |
| 225767_at    | ---                                                                        | --- | 284801    |
| 1557161_at   | Homo sapiens, clone IMAGE:5557975, mRNA                                    | --- | 100132735 |
| 241584_at    | Transcribed locus                                                          | --- | ---       |
| 1557149_at   | Full length insert cDNA clone ZB55F04                                      | --- | ---       |
| 242323_at    | Full-length cDNA clone CSODF027YF17 of Fetal brain of Homo sapiens (human) | --- | 81579     |
| 223358_s_at  | CDNA FLJ33024 fis, clone THYMU1000532, moderately similar to HIGH-AFFINITY | --- | ---       |

|              |                                                                                 |     |      |
|--------------|---------------------------------------------------------------------------------|-----|------|
| 235230_at    | CDNA FLJ34317 fis, clone FEBRA2008475                                           | --- | ---  |
| 241863_x_at  | Transcribed locus                                                               | --- | ---  |
| 236766_at    | Transcribed locus                                                               | --- | ---  |
| 240008_at    | Transcribed locus                                                               | --- | ---  |
| 244346_at    | Transcribed locus                                                               | --- | ---  |
| 242718_at    | Transcribed locus                                                               | --- | ---  |
| 244517_x_at  | MRNA; cDNA DKFZp666J249 (from clone DKFZp666J249)                               | --- | ---  |
| 232156_at    | ---                                                                             | --- | ---  |
| 1562275_at   | MRNA; cDNA DKFZp667P1024 (from clone DKFZp667P1024)                             | --- | ---  |
| 242699_at    | Transcribed locus                                                               | --- | ---  |
| 234134_at    | Clone FLB4701                                                                   | --- | ---  |
| 217300_at    | ---                                                                             | --- | ---  |
| 235299_at    | Transcribed locus                                                               | --- | ---  |
| 241094_at    | ---                                                                             | --- | ---  |
| 213832_at    | MRNA; cDNA DKFZp547P042 (from clone DKFZp547P042)                               | --- | 3752 |
| 1561883_at   | Full length insert cDNA YV20A06                                                 | --- | ---  |
| 244003_at    | ---                                                                             | --- | ---  |
| 1563115_at   | Homo sapiens, clone IMAGE:5170855, mRNA                                         | --- | ---  |
| 232935_at    | Primary neuroblastoma cDNA, clone:Nbla03614, full insert sequence               | --- | ---  |
| 201205_at    | ---                                                                             | --- | ---  |
| 243607_at    | Transcribed locus                                                               | --- | ---  |
| 1558401_at   | CDNA FLJ37332 fis, clone BRAMY2019710                                           | --- | ---  |
| 220884_at    | ---                                                                             | --- | ---  |
| 238009_at    | Transcribed locus                                                               | --- | ---  |
| 1566452_at   | ---                                                                             | --- | ---  |
| 236619_at    | Transcribed locus                                                               | --- | ---  |
| 239963_at    | Transcribed locus                                                               | --- | ---  |
| 231136_at    | ---                                                                             | --- | ---  |
| 242932_at    | Transcribed locus                                                               | --- | ---  |
| 240469_at    | Transcribed locus                                                               | --- | ---  |
| 1567219_at   | ---                                                                             | --- | ---  |
| 239884_at    | ---                                                                             | --- | 8618 |
| 215287_at    | ELISC-1                                                                         | --- | ---  |
| 1566504_at   | CDNA clone IMAGE:5265199                                                        | --- | ---  |
| 241407_at    | CDNA FLJ11682 fis, clone HEMBA1004880                                           | --- | ---  |
| 236531_at    | Clone TEC_AC000123.2-001_FWD mRNA sequence                                      | --- | ---  |
| 244258_at    | Transcribed locus                                                               | --- | ---  |
| 237353_at    | Transcribed locus                                                               | --- | ---  |
| 240880_at    | Transcribed locus                                                               | --- | ---  |
| 239347_at    | Transcribed locus                                                               | --- | ---  |
| 1563298_at   | Homo sapiens, clone IMAGE:3934814, mRNA                                         | --- | ---  |
| 242575_at    | ---                                                                             | --- | ---  |
| 1562229_at   | Full length insert cDNA clone YI41B09                                           | --- | ---  |
| 1562957_at   | Homo sapiens, clone IMAGE:3948753, mRNA                                         | --- | ---  |
| 239240_at    | Transcribed locus                                                               | --- | ---  |
| 242805_at    | ---                                                                             | --- | ---  |
| 229885_at    | Transcribed locus                                                               | --- | ---  |
| 234906_at    | Clone 24900 mRNA sequence                                                       | --- | ---  |
| 240246_at    | CDNA FLJ44826 fis, clone BRACE3046762                                           | --- | ---  |
| 233518_at    | CDNA FLJ11493 fis, clone HEMBA1001940                                           | --- | ---  |
| 236105_at    | Transcribed locus                                                               | --- | ---  |
| 236401_at    | Full-length cDNA clone CS0DI016YI23 of Placenta Cot 25-normalized of Homo sa    | --- | ---  |
| 241613_at    | Transcribed locus, weakly similar to XP_001083900.1 similar to zinc finger CCHC | --- | ---  |
| 215164_at    | MRNA; cDNA DKFZp564I083 (from clone DKFZp564I083)                               | --- | ---  |
| 1555519_at   | ---                                                                             | --- | ---  |
| 230537_at    | ---                                                                             | --- | ---  |
| 226883_at    | CDNA clone IMAGE:4793058                                                        | --- | ---  |
| 243993_at    | ---                                                                             | --- | ---  |
| 243322_at    | Transcribed locus                                                               | --- | ---  |
| 242379_at    | Transcribed locus                                                               | --- | ---  |
| 1557699_x_at | Homo sapiens, clone IMAGE:4043992, mRNA                                         | --- | ---  |
| 236752_at    | Transcribed locus                                                               | --- | ---  |
| 1563469_at   | MRNA; cDNA DKFZp313M0417 (from clone DKFZp313M0417)                             | --- | ---  |

|              |                                                                             |     |           |
|--------------|-----------------------------------------------------------------------------|-----|-----------|
| 1558373_s_at | CDNA FLJ34038 fis, clone FCBBF2005645                                       | --- | ---       |
| 242759_at    | Transcribed locus                                                           | --- | ---       |
| 241520_x_at  | Transcribed locus                                                           | --- | ---       |
| 244679_at    | Transcribed locus                                                           | --- | ---       |
| 1559867_at   | CDNA FLJ32420 fis, clone SKMUS2000898                                       | --- | ---       |
| 1556520_at   | CDNA clone IMAGE:5296510                                                    | --- | ---       |
| 1564129_a_at | CDNA FLJ33482 fis, clone BRAMY2002862, weakly similar to NICOTINATE-NUCLI   | --- | ---       |
| 238565_at    | CDNA FLJ40891 fis, clone UTERU2001110                                       | --- | ---       |
| 1562055_at   | CDNA FLJ33443 fis, clone BRALZ1000103                                       | --- | ---       |
| 244511_at    | Transcribed locus                                                           | --- | ---       |
| 1560817_at   | CDNA FLJ20814 fis, clone ADSE01064                                          | --- | ---       |
| 242912_at    | CDNA FLJ43851 fis, clone TESTI4006728                                       | --- | 641455    |
| 1561915_at   | CDNA clone IMAGE:4798161                                                    | --- | ---       |
| 239907_at    | Transcribed locus                                                           | --- | ---       |
| 237860_at    | Full-length cDNA clone CS0DC006YD17 of Neuroblastoma Cot 25-normalized of   | --- | ---       |
| 1569794_at   | CDNA clone IMAGE:4824066                                                    | --- | ---       |
| 234082_at    | CDNA FLJ11831 fis, clone HEMBA1006562                                       | --- | ---       |
| 241948_at    | Transcribed locus                                                           | --- | ---       |
| 240090_at    | Transcribed locus                                                           | --- | ---       |
| 240364_at    | Transcribed locus                                                           | --- | ---       |
| 235601_at    | Transcribed locus                                                           | --- | ---       |
| 1556352_at   | CDNA FLJ30440 fis, clone BRACE2009185                                       | --- | ---       |
| 244636_at    | Transcribed locus                                                           | --- | ---       |
| 242227_at    | Transcribed locus                                                           | --- | ---       |
| 216090_x_at  | ---                                                                         | --- | ---       |
| 237365_at    | CDNA clone IMAGE:5269899                                                    | --- | ---       |
| 235628_x_at  | ---                                                                         | --- | ---       |
| 237494_at    | Transcribed locus                                                           | --- | ---       |
| 242989_at    | Transcribed locus                                                           | --- | ---       |
| 208360_s_at  | ---                                                                         | --- | ---       |
| 243783_at    | CDNA FLJ36183 fis, clone TESTI2026854                                       | --- | ---       |
| 239122_at    | Transcribed locus                                                           | --- | ---       |
| 232331_at    | CDNA: FLJ23454 fis, clone HSI06959                                          | --- | ---       |
| 211600_at    | ---                                                                         | --- | 5800      |
| 1562281_at   | MRNA; cDNA DKFZp313A0310 (from clone DKFZp313A0310)                         | --- | ---       |
| 238735_at    | ---                                                                         | --- | ---       |
| 1557698_at   | Homo sapiens, clone IMAGE:4043992, mRNA                                     | --- | ---       |
| 230350_at    | Transcribed locus                                                           | --- | ---       |
| 220608_s_at  | ---                                                                         | --- | 54989     |
| 234217_at    | CDNA: FLJ21283 fis, clone COL01910                                          | --- | ---       |
| 226964_at    | CDNA clone IMAGE:5272626                                                    | --- | ---       |
| 239140_at    | Transcribed locus                                                           | --- | ---       |
| 235000_at    | CDNA FLJ30652 fis, clone DFNES2000011                                       | --- | ---       |
| 1557219_at   | CDNA clone IMAGE:5296720                                                    | --- | ---       |
| 1563531_at   | CDNA clone IMAGE:5270399                                                    | --- | ---       |
| 242253_at    | CDNA FLJ37185 fis, clone BRALZ2001743, moderately similar to H.sapiens mRNA | --- | ---       |
| 1562310_at   | CDNA clone IMAGE:4838759                                                    | --- | ---       |
| 215128_at    | CDNA FLJ11682 fis, clone HEMBA1004880                                       | --- | ---       |
| 1560826_at   | CDNA clone IMAGE:4151535                                                    | --- | ---       |
| 1570213_at   | CDNA clone IMAGE:4800022                                                    | --- | ---       |
| 236921_at    | Transcribed locus                                                           | --- | ---       |
| 243484_x_at  | Transcribed locus                                                           | --- | ---       |
| 1565913_at   | Full length insert cDNA clone YR04D03                                       | --- | ---       |
| 1559425_at   | MRNA; cDNA DKFZp667O095 (from clone DKFZp667O095)                           | --- | ---       |
| 232439_at    | CDNA FLJ12030 fis, clone HEMBB1001868                                       | --- | ---       |
| 240410_at    | Transcribed locus                                                           | --- | ---       |
| 234255_at    | MRNA; cDNA DKFZp434E0572 (from clone DKFZp434E0572)                         | --- | ---       |
| 1560827_at   | CDNA clone IMAGE:4820845                                                    | --- | ---       |
| 244642_at    | Transcribed locus                                                           | --- | ---       |
| 1563601_at   | MRNA; cDNA DKFZp761H1018 (from clone DKFZp761H1018)                         | --- | ---       |
| 244732_at    | ---                                                                         | --- | ---       |
| 234757_at    | CDNA FLJ38091 fis, clone CTONG2026770                                       | --- | 100129884 |
| 215422_at    | Cri-du-chat region mRNA, clone NIBB11                                       | --- | ---       |

|              |                                                                        |     |      |
|--------------|------------------------------------------------------------------------|-----|------|
| 232556_at    | CDNA FLJ11890 fis, clone HEMBA1007256                                  | --- | ---  |
| 237893_at    | Transcribed locus                                                      | --- | ---  |
| 229380_at    | Transcribed locus                                                      | --- | ---  |
| 243605_at    | Transcribed locus                                                      | --- | ---  |
| 1553538_s_at | ---                                                                    | --- | 4512 |
| 241845_at    | ---                                                                    | --- | ---  |
| 1559814_at   | CDNA clone IMAGE:6050863                                               | --- | ---  |
| 240835_at    | ---                                                                    | --- | ---  |
| 43511_s_at   | MRNA; cDNA DKFZp762M127 (from clone DKFZp762M127)                      | --- | ---  |
| 242862_x_at  | ---                                                                    | --- | ---  |
| 242723_at    | Transcribed locus                                                      | --- | ---  |
| 1562169_at   | MRNA full length insert cDNA clone EUROIMAGE 131775                    | --- | ---  |
| 242143_at    | Transcribed locus                                                      | --- | ---  |
| 1564878_at   | Homo sapiens, clone IMAGE:4072333, mRNA                                | --- | ---  |
| 233546_at    | CDNA FLJ13003 fis, clone NT2RP3000418                                  | --- | ---  |
| 1555977_at   | CDNA FLJ33153 fis, clone UTERU2000332                                  | --- | ---  |
| 236522_at    | Transcribed locus                                                      | --- | ---  |
| 241632_x_at  | Transcribed locus                                                      | --- | ---  |
| 1561061_at   | CDNA clone IMAGE:5297486                                               | --- | ---  |
| 233066_at    | ---                                                                    | --- | ---  |
| 1568742_at   | CDNA clone IMAGE:2984900                                               | --- | ---  |
| 238185_at    | Transcribed locus                                                      | --- | ---  |
| 239735_at    | MRNA (fetal brain cDNA g6_1g)                                          | --- | ---  |
| 220375_s_at  | ---                                                                    | --- | ---  |
| 242893_at    | Transcribed locus                                                      | --- | ---  |
| 242409_at    | Full-length cDNA clone CS0CAP003YO10 of Thymus of Homo sapiens (human) | --- | ---  |
| 235304_at    | Transcribed locus                                                      | --- | ---  |
| 1557617_at   | CDNA clone IMAGE:4797324                                               | --- | ---  |
| 214078_at    | Primary neuroblastoma cDNA, clone:Nbla04246, full insert sequence      | --- | ---  |
| 232047_at    | ---                                                                    | --- | ---  |
| 232459_at    | CDNA FLJ12174 fis, clone MAMMA1000707                                  | --- | ---  |
| 228481_at    | CDNA FLJ13419 fis, clone PLACE1002115                                  | --- | ---  |
| 241769_at    | Transcribed locus                                                      | --- | ---  |
| 214848_at    | Clone 23548 mRNA sequence                                              | --- | ---  |
| 1561135_at   | Full length insert cDNA clone YT88G03                                  | --- | ---  |
| 241253_at    | ---                                                                    | --- | ---  |
| 232344_at    | CDNA FLJ11750 fis, clone HEMBA1005568                                  | --- | ---  |
| 241718_x_at  | Transcribed locus                                                      | --- | ---  |
| 1555205_at   | ---                                                                    | --- | ---  |
| 228070_at    | CDNA FLJ34250 fis, clone FCBBF4000529                                  | --- | ---  |
| 243384_at    | Transcribed locus                                                      | --- | ---  |
| 236354_at    | Transcribed locus                                                      | --- | ---  |
| 240795_at    | CDNA clone IMAGE:5288566                                               | --- | ---  |
| 242249_at    | ---                                                                    | --- | ---  |
| 1559807_at   | CDNA clone IMAGE:4799886                                               | --- | ---  |
| 240904_at    | ---                                                                    | --- | ---  |
| 241557_x_at  | Transcribed locus                                                      | --- | ---  |
| 229376_at    | ---                                                                    | --- | 5629 |
| 1557637_at   | CDNA clone IMAGE:5267718                                               | --- | ---  |
| 226316_at    | CDNA clone IMAGE:5295896                                               | --- | ---  |
| 236856_x_at  | CDNA FLJ34374 fis, clone FEBRA2017502                                  | --- | ---  |
| 239227_at    | ---                                                                    | --- | ---  |
| 235962_at    | Transcribed locus                                                      | --- | ---  |
| 236038_at    | Transcribed locus                                                      | --- | ---  |
| 234723_x_at  | CDNA: FLJ21228 fis, clone COL00739                                     | --- | ---  |
| 225714_s_at  | ---                                                                    | --- | ---  |
| 232957_x_at  | CDNA FLJ13017 fis, clone NT2RP3000628                                  | --- | ---  |
| 239679_at    | ---                                                                    | --- | ---  |
| 1561638_at   | Full length insert cDNA clone YI46C04                                  | --- | ---  |
| 240000_at    | Transcribed locus                                                      | --- | ---  |
| 232877_at    | CDNA FLJ12342 fis, clone MAMMA1002282                                  | --- | ---  |
| 236293_at    | Transcribed locus                                                      | --- | ---  |
| 243300_at    | Transcribed locus                                                      | --- | ---  |

|              |                                                                             |     |           |
|--------------|-----------------------------------------------------------------------------|-----|-----------|
| 235861_at    | ---                                                                         | --- | ---       |
| 236059_at    | CDNA clone IMAGE:4822341                                                    | --- | 100130428 |
| 231598_x_at  | ---                                                                         | --- | ---       |
| 240620_at    | Transcribed locus                                                           | --- | ---       |
| 237347_at    | CDNA FLJ37166 fis, clone BRACE2027408                                       | --- | ---       |
| 232126_at    | CDNA FLJ13014 fis, clone NT2RP3000592                                       | --- | ---       |
| 241790_at    | Transcribed locus                                                           | --- | ---       |
| 209227_at    | ---                                                                         | --- | 7991      |
| 217054_at    | CDNA FLJ39484 fis, clone PROST2014925                                       | --- | ---       |
| 1552829_at   | ---                                                                         | --- | ---       |
| 241635_at    | Transcribed locus                                                           | --- | ---       |
| 1556393_at   | Full length insert cDNA clone YY79F02                                       | --- | ---       |
| 224546_at    | ---                                                                         | --- | ---       |
| 233912_x_at  | CDNA FLJ11463 fis, clone HEMBA1001608                                       | --- | ---       |
| 239888_at    | ---                                                                         | --- | ---       |
| 222370_x_at  | ---                                                                         | --- | ---       |
| 242886_at    | Transcribed locus                                                           | --- | ---       |
| 234176_at    | CDNA: FLJ21224 fis, clone COL00694                                          | --- | ---       |
| 1569753_at   | CDNA clone IMAGE:4828604                                                    | --- | ---       |
| 1561573_at   | Homo sapiens, clone IMAGE:5528716, mRNA                                     | --- | ---       |
| 1560887_a_at | Full length insert cDNA clone ZC40A10                                       | --- | ---       |
| 239032_at    | Transcribed locus                                                           | --- | ---       |
| 222079_at    | ---                                                                         | --- | 2078      |
| 234534_at    | CDNA FLJ20100 fis, clone COL04648                                           | --- | ---       |
| 236285_at    | Transcribed locus                                                           | --- | ---       |
| 1567100_at   | Full length insert cDNA clone YB38D04                                       | --- | ---       |
| 236935_at    | CDNA clone IMAGE:4813920                                                    | --- | ---       |
| 234634_at    | CDNA: FLJ21448 fis, clone COL04473                                          | --- | ---       |
| 244568_at    | Transcribed locus                                                           | --- | ---       |
| 236194_at    | Transcribed locus, moderately similar to NP_001018860.1 protein LOC401398 [ | --- | ---       |
| 236879_at    | Transcribed locus                                                           | --- | ---       |
| 235757_at    | Transcribed locus                                                           | --- | ---       |
| 240186_at    | Transcribed locus                                                           | --- | ---       |
| 236422_at    | Transcribed locus                                                           | --- | ---       |
| 224254_x_at  | ---                                                                         | --- | ---       |
| 1563427_at   | Homo sapiens, clone IMAGE:5538612, mRNA                                     | --- | ---       |
| 233036_at    | CDNA FLJ10237 fis, clone HEMBB1000438                                       | --- | ---       |
| 238512_at    | Transcribed locus                                                           | --- | ---       |
| 242311_x_at  | Transcribed locus                                                           | --- | ---       |
| 242317_at    | Transcribed locus                                                           | --- | 25994     |
| 1554766_s_at | ---                                                                         | --- | ---       |
| 244469_at    | Transcribed locus                                                           | --- | ---       |
| 1570264_at   | Homo sapiens, clone IMAGE:4337699, mRNA                                     | --- | ---       |
| 243489_at    | Transcribed locus                                                           | --- | ---       |
| 239519_at    | Transcribed locus                                                           | --- | ---       |
| 206936_x_at  | ---                                                                         | --- | ---       |
| 243846_x_at  | ---                                                                         | --- | ---       |
| 239082_at    | CDNA clone IMAGE:5311370                                                    | --- | ---       |
| 1560082_at   | MRNA; cDNA DKFZp761L0119 (from clone DKFZp761L0119)                         | --- | ---       |
| 233765_at    | CDNA FLJ13711 fis, clone PLACE2000379                                       | --- | ---       |
| 233224_at    | MRNA; cDNA DKFZp586D0924 (from clone DKFZp586D0924)                         | --- | ---       |
| 234509_at    | MRNA; cDNA DKFZp564B206 (from clone DKFZp564B206)                           | --- | ---       |
| 1569782_at   | CDNA clone IMAGE:5259303                                                    | --- | ---       |
| 242967_at    | ---                                                                         | --- | ---       |
| 49111_at     | MRNA; cDNA DKFZp762M127 (from clone DKFZp762M127)                           | --- | ---       |
| 242496_at    | CDNA FLJ23728 fis, clone HEP14243                                           | --- | ---       |
| 1564369_at   | CDNA: FLJ21734 fis, clone COLF1954                                          | --- | ---       |
| 244298_at    | ---                                                                         | --- | ---       |
| 242399_at    | ---                                                                         | --- | ---       |
| 239701_at    | Transcribed locus                                                           | --- | ---       |
| 240138_at    | Transcribed locus                                                           | --- | ---       |
| 220352_x_at  | ---                                                                         | --- | 645644    |
| 239242_at    | CDNA FLJ34775 fis, clone NT2NE2003315                                       | --- | ---       |



|              |                                                                                |     |       |
|--------------|--------------------------------------------------------------------------------|-----|-------|
| 244668_at    | Transcribed locus, strongly similar to XP_530687.1 hypothetical protein XP_530 | --- | ---   |
| 242708_at    | Transcribed locus                                                              | --- | ---   |
| 240095_at    | Transcribed locus                                                              | --- | ---   |
| 233431_x_at  | Breast cancer estrogen-induced apoptosis 3 mRNA sequence                       | --- | ---   |
| 1557302_at   | CDNA FLJ33255 fis, clone ASTRO2005553                                          | --- | ---   |
| 239170_at    | Transcribed locus                                                              | --- | ---   |
| 233330_s_at  | Unknown mRNA sequence                                                          | --- | ---   |
| 236280_at    | Transcribed locus                                                              | --- | ---   |
| 237566_at    | Transcribed locus                                                              | --- | ---   |
| 1561467_at   | CDNA clone IMAGE:4831108                                                       | --- | ---   |
| 239857_at    | CDNA FLJ37227 fis, clone BRAMY2000277                                          | --- | ---   |
| 1553439_at   | ---                                                                            | --- | ---   |
| 224005_at    | PNAS-130                                                                       | --- | ---   |
| 241542_at    | Transcribed locus                                                              | --- | ---   |
| 236367_at    | ---                                                                            | --- | 9887  |
| 1570087_at   | Homo sapiens, clone IMAGE:4717361, mRNA                                        | --- | ---   |
| 1569961_at   | Homo sapiens, clone IMAGE:2960615, mRNA                                        | --- | ---   |
| 244633_at    | Transcribed locus                                                              | --- | ---   |
| 243356_at    | Transcribed locus                                                              | --- | ---   |
| 240125_at    | Transcribed locus                                                              | --- | ---   |
| 216437_at    | CDNA: FLJ21296 fis, clone COL02029                                             | --- | ---   |
| 239784_at    | Transcribed locus                                                              | --- | ---   |
| 242252_at    | Transcribed locus                                                              | --- | ---   |
| 238371_s_at  | Transcribed locus                                                              | --- | ---   |
| 237825_x_at  | Transcribed locus                                                              | --- | ---   |
| 217490_at    | MRNA; cDNA DKFZp564P073 (from clone DKFZp564P073)                              | --- | ---   |
| 237652_at    | Transcribed locus, strongly similar to XP_529248.1 similar to KIAA0522 protein | --- | ---   |
| 236297_at    | CDNA FLJ45742 fis, clone KIDNE2016327                                          | --- | ---   |
| 241686_x_at  | Transcribed locus                                                              | --- | ---   |
| 241656_at    | Transcribed locus                                                              | --- | ---   |
| 1560745_at   | CDNA clone IMAGE:5299239                                                       | --- | ---   |
| 231484_at    | Transcribed locus                                                              | --- | ---   |
| 213658_at    | MRNA full length insert cDNA clone EUROIMAGE 826033                            | --- | ---   |
| 1564323_at   | CDNA: FLJ21389 fis, clone COL03455                                             | --- | ---   |
| 243515_at    | Homo sapiens, clone IMAGE:3641312, mRNA                                        | --- | ---   |
| 243114_at    | Transcribed locus                                                              | --- | ---   |
| 1566607_at   | MRNA; cDNA DKFZp667O0522 (from clone DKFZp667O0522)                            | --- | ---   |
| 234640_x_at  | CDNA: FLJ22614 fis, clone HSI05089                                             | --- | ---   |
| 230892_at    | Transcribed locus                                                              | --- | ---   |
| 241773_at    | ---                                                                            | --- | ---   |
| 212233_at    | 3'UTR of hypothetical protein (ORF1)                                           | --- | 4131  |
| 232667_at    | CDNA FLJ13690 fis, clone PLACE2000097                                          | --- | ---   |
| 1562849_at   | CDNA FLJ37115 fis, clone BRACE2022158                                          | --- | ---   |
| 237034_at    | Full-length cDNA clone CS0DC025YP03 of Neuroblastoma Cot 25-normalized of      | --- | ---   |
| 1557745_at   | CDNA FLJ25178 fis, clone CBR09176                                              | --- | ---   |
| 239504_at    | ---                                                                            | --- | ---   |
| 1570382_at   | ---                                                                            | --- | ---   |
| 233214_at    | CDNA FLJ11900 fis, clone HEMBA1007341                                          | --- | ---   |
| 244008_at    | ---                                                                            | --- | ---   |
| 242803_at    | Transcribed locus                                                              | --- | ---   |
| 239135_at    | Transcribed locus                                                              | --- | 55313 |
| 243974_at    | CDNA clone IMAGE:4821815                                                       | --- | ---   |
| 222159_at    | CDNA FLJ12996 fis, clone NT2RP3000235                                          | --- | ---   |
| 242476_at    | Transcribed locus                                                              | --- | ---   |
| 215825_at    | Clone 24487 mRNA sequence                                                      | --- | ---   |
| 1558742_at   | Homo sapiens, clone IMAGE:4872114, mRNA                                        | --- | ---   |
| 227227_at    | CDNA FLJ32605 fis, clone STOMA1000175                                          | --- | ---   |
| 239989_at    | Transcribed locus                                                              | --- | 54875 |
| 240765_at    | ---                                                                            | --- | ---   |
| 217665_at    | CDNA FLJ25947 fis, clone JTH14708                                              | --- | ---   |
| 1565535_x_at | ---                                                                            | --- | ---   |
| 230183_at    | ---                                                                            | --- | 2131  |
| 241432_at    | Homo sapiens, clone IMAGE:5166236, mRNA                                        | --- | ---   |

|              |                                                                                   |     |           |
|--------------|-----------------------------------------------------------------------------------|-----|-----------|
| 217177_s_at  | CDNA FLJ13658 fis, clone PLACE1011567                                             | --- | 5787      |
| 237068_at    | Transcribed locus                                                                 | --- | ---       |
| 237485_at    | Transcribed locus                                                                 | --- | 6428      |
| 243074_at    | Transcribed locus                                                                 | --- | ---       |
| 235108_at    | CDNA FLJ41679 fis, clone HCASM2003212                                             | --- | ---       |
| 1562464_at   | CDNA clone IMAGE:4792825                                                          | --- | ---       |
| 243006_at    | CDNA FLJ30333 fis, clone BRACE2007262                                             | --- | ---       |
| 226587_at    | CDNA FLJ33569 fis, clone BRAMY2010317                                             | --- | ---       |
| 1560812_at   | Homo sapiens, clone IMAGE:5170902, mRNA                                           | --- | ---       |
| 216062_at    | Transcribed locus                                                                 | --- | ---       |
| 217703_x_at  | Transcribed locus                                                                 | --- | ---       |
| 242160_at    | Transcribed locus                                                                 | --- | ---       |
| 241016_at    | ---                                                                               | --- | ---       |
| 234194_at    | CDNA: FLJ21944 fis, clone HEP04662                                                | --- | ---       |
| 232858_at    | CDNA FLJ11927 fis, clone HEMBB1000402                                             | --- | ---       |
| 229420_at    | CDNA FLJ37566 fis, clone BRCOC2002085                                             | --- | ---       |
| 214989_x_at  | CDNA FLJ11875 fis, clone HEMBA1007078                                             | --- | ---       |
| 242969_at    | Transcribed locus                                                                 | --- | ---       |
| 232975_at    | Homo sapiens, clone IMAGE:6152133, mRNA                                           | --- | ---       |
| 235617_x_at  | Homo sapiens, clone IMAGE:4293240, mRNA                                           | --- | ---       |
| 234099_at    | CDNA FLJ13494 fis, clone PLACE1004384                                             | --- | ---       |
| 1563320_at   | Full length insert cDNA clone YU69D10                                             | --- | ---       |
| 239237_at    | (clone HGP09/HGP32) T cell receptor gamma-2 chain processed pseudogene m---       | --- | ---       |
| 232096_x_at  | CDNA: FLJ22140 fis, clone HEP20977                                                | --- | ---       |
| 230657_at    | Transcribed locus                                                                 | --- | ---       |
| 233433_at    | CDNA FLJ13810 fis, clone THYRO1000279                                             | --- | ---       |
| 1560533_at   | Homo sapiens, clone IMAGE:5744167, mRNA                                           | --- | ---       |
| 234643_x_at  | CDNA: FLJ21798 fis, clone HEP00573                                                | --- | ---       |
| 217416_x_at  | ---                                                                               | --- | ---       |
| 241803_s_at  | ---                                                                               | --- | 100130623 |
| 244639_at    | Transcribed locus                                                                 | --- | ---       |
| 244354_at    | ELISC-1                                                                           | --- | ---       |
| 238000_at    | Transcribed locus                                                                 | --- | ---       |
| 1560941_a_at | CDNA FLJ32834 fis, clone TESTI2003236                                             | --- | ---       |
| 233405_at    | CDNA FLJ13333 fis, clone OVARC1001828                                             | --- | ---       |
| 234578_at    | MRNA; cDNA DKFZp434E1812 (from clone DKFZp434E1812)                               | --- | ---       |
| 238571_at    | Transcribed locus                                                                 | --- | ---       |
| 234135_x_at  | CDNA FLJ11590 fis, clone HEMBA1003758                                             | --- | ---       |
| 226885_at    | Transcribed locus                                                                 | --- | ---       |
| 242732_at    | Transcribed locus                                                                 | --- | ---       |
| 237982_at    | CDNA clone IMAGE:4827146                                                          | --- | ---       |
| 1567008_at   | Full length insert cDNA clone YU51G05                                             | --- | ---       |
| 240974_at    | Transcribed locus, strongly similar to XP_530947.1 hypothetical protein XP_530--- | --- | ---       |
| 234346_x_at  | CDNA FLJ11369 fis, clone HEMBA1000338                                             | --- | ---       |
| 242863_at    | ---                                                                               | --- | ---       |
| 244726_at    | Transcribed locus                                                                 | --- | ---       |
| 234532_at    | MRNA; cDNA DKFZp586E1423 (from clone DKFZp586E1423)                               | --- | ---       |
| 235361_at    | Transcribed locus                                                                 | --- | ---       |
| 230651_at    | Transcribed locus                                                                 | --- | ---       |
| 239992_at    | Transcribed locus                                                                 | --- | ---       |
| 239752_at    | CDNA FLJ38271 fis, clone FCBBF3002782, moderately similar to Leptin receptor      | --- | ---       |
| 213848_at    | MRNA; cDNA DKFZp586F2224 (from clone DKFZp586F2224)                               | --- | ---       |
| 234667_at    | CDNA: FLJ23208 fis, clone ADSE01253                                               | --- | ---       |
| 244375_at    | Transcribed locus                                                                 | --- | ---       |
| 214985_at    | Clone 24739 mRNA sequence                                                         | --- | 2131      |
| 244291_x_at  | Transcribed locus                                                                 | --- | ---       |
| 216538_at    | MRNA; cDNA DKFZp566C093 (from clone DKFZp566C093)                                 | --- | ---       |
| 215479_at    | CDNA FLJ20780 fis, clone COL04256                                                 | --- | ---       |
| 1567913_at   | Clone SS108 A10F1 hypoxanthine phosphoribosyltransferase (hpert) 1200 kb delt---  | --- | ---       |
| 1570503_at   | Homo sapiens, Similar to likely ortholog of yeast ARV1, clone IMAGE:4576306, r--- | --- | ---       |
| 208185_x_at  | ---                                                                               | --- | ---       |
| 234322_at    | CDNA: FLJ21248 fis, clone COL01235                                                | --- | ---       |
| 1561702_at   | CDNA clone IMAGE:5268043                                                          | --- | ---       |

|              |                                                                                |     |           |
|--------------|--------------------------------------------------------------------------------|-----|-----------|
| 216068_at    | MRNA; cDNA DKFZp434N021 (from clone DKFZp434N021)                              | --- | ---       |
| 238775_at    | Transcribed locus                                                              | --- | ---       |
| 241907_at    | Full length insert cDNA clone YR58A05                                          | --- | ---       |
| 1561877_at   | CDNA clone IMAGE:4825762                                                       | --- | ---       |
| 230099_at    | Transcribed locus                                                              | --- | ---       |
| 235761_at    | CDNA FLJ36553 fis, clone TRACH2008478                                          | --- | ---       |
| 1553275_s_at | ---                                                                            | --- | ---       |
| 231212_x_at  | ---                                                                            | --- | ---       |
| 233412_x_at  | CDNA FLJ11849 fis, clone HEMBA1006709                                          | --- | ---       |
| 225886_at    | Full-length cDNA clone CS0DF030YM05 of Fetal brain of Homo sapiens (human)     | --- | ---       |
| 233406_at    | CDNA FLJ12038 fis, clone HEMBB1001922                                          | --- | ---       |
| 239723_at    | Transcribed locus                                                              | --- | ---       |
| 235696_at    | CDNA clone IMAGE:4837650                                                       | --- | ---       |
| 242391_at    | ---                                                                            | --- | ---       |
| 244605_at    | ---                                                                            | --- | ---       |
| 1570290_at   | CDNA clone IMAGE:5288437                                                       | --- | ---       |
| 1570567_at   | CDNA clone IMAGE:4753178                                                       | --- | ---       |
| 242471_at    | Clone HLS_IMAGE_238756 mRNA sequence                                           | --- | ---       |
| 1561642_at   | Full length insert cDNA clone YN62D03                                          | --- | ---       |
| 1558588_at   | CDNA FLJ10130 fis, clone HEMBA1003035                                          | --- | ---       |
| 243240_at    | Transcribed locus                                                              | --- | ---       |
| 229498_at    | MRNA; cDNA DKFZp779M2422 (from clone DKFZp779M2422)                            | --- | ---       |
| 240813_at    | Transcribed locus                                                              | --- | ---       |
| 242397_at    | ---                                                                            | --- | ---       |
| 239171_at    | ---                                                                            | --- | ---       |
| 238712_at    | Transcribed locus                                                              | --- | ---       |
| 241124_at    | Transcribed locus                                                              | --- | ---       |
| 213960_at    | CDNA FLJ37610 fis, clone BRCOC2011398                                          | --- | 4916      |
| 241466_at    | Transcribed locus                                                              | --- | ---       |
| 1556281_at   | Full length insert cDNA clone YI54A07                                          | --- | ---       |
| 216051_x_at  | CDNA FLJ14139 fis, clone MAMMA1002830                                          | --- | 100169750 |
| 242232_at    | ---                                                                            | --- | ---       |
| 228341_at    | CDNA FLJ34034 fis, clone FCBBF2004671                                          | --- | ---       |
| 230503_at    | Transcribed locus                                                              | --- | ---       |
| 236429_at    | Homo sapiens, clone IMAGE:4423835, mRNA                                        | --- | 55769     |
| 1554007_at   | CDNA clone IMAGE:5303689                                                       | --- | ---       |
| 234282_at    | MRNA; cDNA DKFZp586E1423 (from clone DKFZp586E1423)                            | --- | ---       |
| 1566228_at   | CDNA clone IMAGE:2988896                                                       | --- | ---       |
| 1566954_at   | CDNA: FLJ20891 fis, clone ADKA03345                                            | --- | ---       |
| 1556787_s_at | ---                                                                            | --- | 8654      |
| 241835_at    | CDNA clone IMAGE:4822225                                                       | --- | ---       |
| 240499_at    | Transcribed locus                                                              | --- | ---       |
| 1562456_at   | MRNA; cDNA DKFZp566C0924 (from clone DKFZp566C0924)                            | --- | ---       |
| 234440_at    | KT041 mRNA for T-cell receptor delta-chain V(delta)3-N1-D(delta)1-N2-D(delta); | --- | 6955      |
| 239668_at    | Transcribed locus                                                              | --- | ---       |
| 232369_at    | Clone IMAGE:119716, mRNA sequence                                              | --- | ---       |
| 1557830_at   | CDNA FLJ10112 fis, clone HEMBA1002750                                          | --- | ---       |
| 239514_at    | Transcribed locus                                                              | --- | ---       |
| 1570143_at   | Homo sapiens, clone IMAGE:3932570, mRNA                                        | --- | ---       |
| 215284_at    | Clone 24407 mRNA sequence                                                      | --- | ---       |
| 233017_x_at  | CDNA FLJ12326 fis, clone MAMMA1002132                                          | --- | ---       |
| 244389_at    | Transcribed locus                                                              | --- | ---       |
| 244650_at    | CDNA FLJ43660 fis, clone SYNOV4004823                                          | --- | ---       |
| 235046_at    | Transcribed locus                                                              | --- | ---       |
| 241785_at    | Transcribed locus                                                              | --- | ---       |
| 1557477_at   | CDNA FLJ33037 fis, clone THYMU2000317                                          | --- | ---       |
| 238103_at    | CDNA FLJ37936 fis, clone CTONG2005468                                          | --- | ---       |
| 227426_at    | Transcribed locus                                                              | --- | 6654      |
| 238895_at    | Transcribed locus                                                              | --- | ---       |
| 215864_at    | CDNA: FLJ21424 fis, clone COL04157                                             | --- | ---       |
| 1565599_at   | Clone 23712 mRNA sequence                                                      | --- | ---       |
| 233508_at    | Transcribed locus                                                              | --- | ---       |
| 240290_at    | Transcribed locus                                                              | --- | ---       |

|              |                                                       |     |       |
|--------------|-------------------------------------------------------|-----|-------|
| 240046_at    | ---                                                   | --- | ---   |
| 243480_at    | ---                                                   | --- | ---   |
| 233445_at    | Transcribed locus                                     | --- | ---   |
| 242175_at    | ---                                                   | --- | ---   |
| 216751_at    | CDNA: FLJ21226 fis, clone COL00721                    | --- | ---   |
| 236881_at    | Transcribed locus                                     | --- | ---   |
| 1560433_at   | CDNA FLJ31398 fis, clone NT2NE1000175                 | --- | ---   |
| 216757_at    | CDNA: FLJ21342 fis, clone COL02673                    | --- | ---   |
| 1560798_at   | CDNA FLJ14121 fis, clone MAMMA1002009                 | --- | ---   |
| 244185_at    | Transcribed locus                                     | --- | ---   |
| 220871_at    | ---                                                   | --- | ---   |
| 1569987_at   | Homo sapiens, clone IMAGE:5583231, mRNA               | --- | ---   |
| 216739_at    | CDNA: FLJ20874 fis, clone ADKA02818                   | --- | ---   |
| 239467_at    | Transcribed locus                                     | --- | ---   |
| 239840_at    | CDNA clone IMAGE:4814828                              | --- | ---   |
| 1563715_at   | MRNA; cDNA DKFZp761B0221 (from clone DKFZp761B0221)   | --- | ---   |
| 1556595_at   | CDNA clone IMAGE:4828841                              | --- | ---   |
| 231680_at    | Transcribed locus                                     | --- | ---   |
| 1558739_at   | CDNA FLJ37336 fis, clone BRAMY2020412                 | --- | ---   |
| 240738_at    | Transcribed locus                                     | --- | ---   |
| 1556832_at   | CDNA FLJ34046 fis, clone FCBBF2007610                 | --- | ---   |
| 1559066_at   | Transcribed locus                                     | --- | ---   |
| 233775_x_at  | CDNA FLJ13242 fis, clone OVARC1000578                 | --- | ---   |
| 243584_at    | Transcribed locus                                     | --- | ---   |
| 230416_at    | Transcribed locus                                     | --- | ---   |
| 1562408_at   | CDNA clone IMAGE:5269062                              | --- | ---   |
| 206962_x_at  | ---                                                   | --- | ---   |
| 233736_at    | ---                                                   | --- | 79470 |
| 241303_x_at  | ---                                                   | --- | ---   |
| 243615_at    | Transcribed locus                                     | --- | ---   |
| 237632_at    | ---                                                   | --- | ---   |
| 244530_at    | Transcribed locus                                     | --- | ---   |
| 242110_at    | Transcribed locus                                     | --- | ---   |
| 234101_at    | CDNA FLJ11044 fis, clone PLACE1004451                 | --- | ---   |
| 217449_at    | MRNA; cDNA DKFZp434D1516 (from clone DKFZp434D1516)   | --- | ---   |
| 230688_at    | Clone IMAGE:238558, mRNA sequence                     | --- | ---   |
| 1566709_at   | CDNA: FLJ21287 fis, clone COL01918                    | --- | ---   |
| 1568983_a_at | CDNA clone IMAGE:5261717                              | --- | ---   |
| 231471_at    | Transcribed locus                                     | --- | ---   |
| 1556582_at   | CDNA FLJ25946 fis, clone JTH14258                     | --- | ---   |
| 226625_at    | ---                                                   | --- | 7049  |
| 233579_at    | CDNA: FLJ22749 fis, clone KAIA0458                    | --- | ---   |
| 234020_x_at  | CDNA clone IMAGE:4698949                              | --- | ---   |
| 241922_at    | ---                                                   | --- | ---   |
| 242787_at    | Transcribed locus                                     | --- | ---   |
| 238785_at    | Transcribed locus                                     | --- | ---   |
| 221174_at    | ---                                                   | --- | ---   |
| 240824_at    | Transcribed locus                                     | --- | ---   |
| 1566003_x_at | CDNA FLJ38745 fis, clone KIDNE2012291                 | --- | ---   |
| 1563244_at   | CDNA clone IMAGE:3881027                              | --- | ---   |
| 241852_at    | Transcribed locus                                     | --- | ---   |
| 208263_at    | ---                                                   | --- | 6731  |
| 240800_x_at  | Transcribed locus                                     | --- | ---   |
| 234566_at    | MRNA; cDNA DKFZp761E11121 (from clone DKFZp761E11121) | --- | ---   |
| 242784_at    | Transcribed locus                                     | --- | ---   |
| 1561303_at   | CDNA clone IMAGE:4828317                              | --- | ---   |
| 227665_at    | CDNA clone IMAGE:5500261                              | --- | ---   |
| 242952_at    | ---                                                   | --- | ---   |
| 243768_at    | Transcribed locus                                     | --- | ---   |
| 238620_at    | Transcribed locus                                     | --- | ---   |
| 241375_at    | Transcribed locus                                     | --- | ---   |
| 233834_at    | CDNA: FLJ21392 fis, clone COL03505                    | --- | ---   |
| 237716_at    | ---                                                   | --- | ---   |

|              |                                                                                 |     |              |
|--------------|---------------------------------------------------------------------------------|-----|--------------|
| 237104_at    | Transcribed locus                                                               | --- | ---          |
| 1562069_at   | ---                                                                             | --- | ---          |
| 241491_at    | Transcribed locus                                                               | --- | ---          |
| 1566716_at   | MRNA; cDNA DKFZp566F0224 (from clone DKFZp566F0224)                             | --- | ---          |
| 1561155_at   | Full length insert cDNA clone ZD60E09                                           | --- | ---          |
| 242868_at    | Transcribed locus                                                               | --- | ---          |
| 1560474_at   | Homo sapiens, clone IMAGE:4294221, mRNA                                         | --- | ---          |
| 232789_at    | ---                                                                             | --- | ---          |
| 239734_at    | Transcribed locus                                                               | --- | ---          |
| 1552976_at   | ---                                                                             | --- | ---          |
| 243902_at    | Transcribed locus                                                               | --- | ---          |
| 216858_x_at  | ---                                                                             | --- | ---          |
| 213642_at    | ---                                                                             | --- | ---          |
| 229083_at    | Full-length cDNA clone CS0DC006YB07 of Neuroblastoma Cot 25-normalized of       | --- | 10949        |
| 1561360_at   | CDNA clone IMAGE:5272441                                                        | --- | ---          |
| 217446_x_at  | MRNA; cDNA DKFZp434M054 (from clone DKFZp434M054)                               | --- | ---          |
| 221155_x_at  | PRO1496                                                                         | --- | ---          |
| 236569_at    | Transcribed locus                                                               | --- | ---          |
| 237571_at    | Transcribed locus                                                               | --- | ---          |
| 244028_at    | Transcribed locus                                                               | --- | ---          |
| 1556568_a_at | Clone C4E 5.3 (CAC)n/(GTG)n repeat-containing mRNA                              | --- | ---          |
| 1560995_s_at | Full length insert cDNA clone ZD81E01                                           | --- | ---          |
| 228380_at    | Transcribed locus                                                               | --- | ---          |
| 228088_at    | CDNA FLJ31513 fis, clone NT2RI1000127                                           | --- | 91404        |
| 229781_at    | Full-length cDNA clone CS0DI036YE11 of Placenta Cot 25-normalized of Homo s     | --- | ---          |
| 229920_at    | Transcribed locus                                                               | --- | ---          |
| 234239_at    | CDNA: FLJ21668 fis, clone COL08982                                              | --- | ---          |
| 232511_at    | CDNA FLJ41714 fis, clone HLUNG2012287                                           | --- | ---          |
| 236419_at    | Transcribed locus                                                               | --- | ---          |
| 242978_x_at  | Transcribed locus                                                               | --- | ---          |
| 213543_at    | MRNA from chromosome 5q31-33 region                                             | --- | 6444         |
| 1558504_at   | Full length insert cDNA clone ZE14C04                                           | --- | ---          |
| 235538_at    | CDNA FLJ30718 fis, clone FCBBF2001675                                           | --- | ---          |
| 244145_at    | Transcribed locus                                                               | --- | ---          |
| 1570350_at   | Homo sapiens, Similar to hypothetical protein FLJ20234, clone IMAGE:5210552,    | --- | ---          |
| 233185_at    | CDNA FLJ37783 fis, clone BRHIP2028187                                           | --- | ---          |
| 239017_at    | Transcribed locus, moderately similar to XP_497913.3 similar to alpha 3 type VI | --- | ---          |
| 222368_at    | CDNA FLJ37098 fis, clone BRACE2019004                                           | --- | ---          |
| 242628_at    | Transcribed locus                                                               | --- | ---          |
| 1562974_at   | CDNA clone IMAGE:5302821                                                        | --- | 100133899    |
| 241555_at    | Transcribed locus                                                               | --- | ---          |
| 243078_at    | ---                                                                             | --- | ---          |
| 233702_x_at  | CDNA: FLJ20946 fis, clone ADSE01819                                             | --- | ---          |
| 1564656_at   | ---                                                                             | --- | ---          |
| 1556328_at   | CDNA clone IMAGE:5301690                                                        | --- | ---          |
| 242924_at    | ---                                                                             | --- | ---          |
| 1553588_at   | ---                                                                             | --- | 30011 /// 4! |
| 233690_at    | CDNA: FLJ23090 fis, clone LNG07119                                              | --- | ---          |
| 235860_at    | Transcribed locus                                                               | --- | ---          |
| 216702_x_at  | Unknown protein                                                                 | --- | ---          |
| 220820_at    | ---                                                                             | --- | ---          |
| 240495_at    | CDNA clone IMAGE:5266735                                                        | --- | ---          |
| 1559495_at   | CDNA clone IMAGE:4829327                                                        | --- | ---          |
| 65472_at     | Transcribed locus                                                               | --- | 388969       |
| 1562674_at   | Homo sapiens, clone IMAGE:5165176, mRNA                                         | --- | ---          |
| 1569091_at   | CDNA clone IMAGE:5312161                                                        | --- | ---          |
| 231374_at    | Transcribed locus                                                               | --- | ---          |
| 243801_x_at  | Transcribed locus                                                               | --- | ---          |
| 1560214_at   | ---                                                                             | --- | ---          |
| 1566231_at   | MRNA; cDNA DKFZp667I0318 (from clone DKFZp667I0318)                             | --- | ---          |
| 227087_at    | CDNA FLJ34214 fis, clone FCBBF3021807                                           | --- | ---          |
| 242763_at    | ---                                                                             | --- | ---          |
| 241945_at    | ---                                                                             | --- | ---          |

|              |                                                                                  |     |           |
|--------------|----------------------------------------------------------------------------------|-----|-----------|
| 229803_s_at  | Transcribed locus                                                                | --- | ---       |
| 217322_x_at  | ---                                                                              | --- | ---       |
| 241015_at    | Transcribed locus                                                                | --- | ---       |
| 236577_at    | Transcribed locus                                                                | --- | ---       |
| 216126_at    | ---                                                                              | --- | ---       |
| 240798_at    | ---                                                                              | --- | ---       |
| 236282_at    | CDNA clone IMAGE:4826240                                                         | --- | ---       |
| 241100_at    | Transcribed locus                                                                | --- | ---       |
| 1561560_at   | CDNA clone IMAGE:5288946                                                         | --- | ---       |
| 228930_at    | MRNA full length insert cDNA clone EUROIMAGE 898037                              | --- | ---       |
| 1554948_at   | ---                                                                              | --- | ---       |
| 1569004_at   | Homo sapiens, Similar to neuronal thread protein, clone IMAGE:4106635, mRNA      | --- | ---       |
| 1558977_at   | CDNA FLJ37263 fis, clone BRAMY2011064                                            | --- | ---       |
| 235134_at    | CDNA FLJ30156 fis, clone BRACE2000487                                            | --- | ---       |
| 241129_at    | Transcribed locus                                                                | --- | ---       |
| 239236_at    | Transcribed locus                                                                | --- | ---       |
| 235730_at    | CDNA FLJ34425 fis, clone HHDPC2008297                                            | --- | ---       |
| 1556148_s_at | CDNA clone IMAGE:5274427                                                         | --- | ---       |
| 1570061_at   | CDNA clone IMAGE:4555030                                                         | --- | ---       |
| 233511_at    | CDNA clone IMAGE:5271538                                                         | --- | ---       |
| 232471_at    | CDNA FLJ11954 fis, clone HEMBB1000888                                            | --- | ---       |
| 233726_at    | MRNA; cDNA DKFZp586C1523 (from clone DKFZp586C1523)                              | --- | ---       |
| 230886_at    | Transcribed locus                                                                | --- | ---       |
| 232709_at    | CDNA FLJ13427 fis, clone PLACE1002477                                            | --- | ---       |
| 226865_at    | MRNA; cDNA DKFZp564O0862 (from clone DKFZp564O0862)                              | --- | ---       |
| 242861_at    | ---                                                                              | --- | ---       |
| 239376_at    | CDNA clone IMAGE:4333081                                                         | --- | ---       |
| 237609_at    | Transcribed locus                                                                | --- | ---       |
| 224375_at    | ---                                                                              | --- | ---       |
| 243174_at    | Transcribed locus                                                                | --- | ---       |
| 234150_at    | CDNA FLJ13777 fis, clone PLACE4000392                                            | --- | ---       |
| 1562529_s_at | Homo sapiens, clone IMAGE:5747561, mRNA                                          | --- | ---       |
| 1557353_at   | CDNA FLJ38904 fis, clone NT2NE2001524                                            | --- | ---       |
| 244674_at    | Transcribed locus                                                                | --- | ---       |
| 242188_at    | Transcribed locus                                                                | --- | ---       |
| 241630_at    | ---                                                                              | --- | ---       |
| 1557817_a_at | HSPC103                                                                          | --- | 100131941 |
| 242895_x_at  | Transcribed locus                                                                | --- | ---       |
| 236716_at    | CDNA clone IMAGE:5303125                                                         | --- | ---       |
| 244475_at    | Transcribed locus, strongly similar to XP_001139231.1 hypothetical protein [Pai  | --- | ---       |
| 244618_at    | Transcribed locus                                                                | --- | ---       |
| 237983_at    | ---                                                                              | --- | ---       |
| 235419_at    | Transcribed locus                                                                | --- | ---       |
| 231181_at    | Transcribed locus                                                                | --- | ---       |
| 215604_x_at  | CDNA FLJ13721 fis, clone PLACE2000450                                            | --- | ---       |
| 235456_at    | CDNA clone IMAGE:4819084                                                         | --- | ---       |
| 233995_at    | Clone HQ0663 PRO0663                                                             | --- | ---       |
| 221043_at    | ---                                                                              | --- | ---       |
| 242607_at    | Transcribed locus                                                                | --- | ---       |
| 1559201_a_at | CDNA FLJ33715 fis, clone BRAWH2008577                                            | --- | ---       |
| 1565579_at   | CDNA clone IMAGE:3689276                                                         | --- | ---       |
| 1561112_at   | CDNA clone IMAGE:5299117                                                         | --- | ---       |
| 1559691_at   | CDNA clone IMAGE:3869664                                                         | --- | ---       |
| 239300_at    | CDNA clone IMAGE:4798675                                                         | --- | ---       |
| 226779_at    | CDNA FLJ37302 fis, clone BRAMY2016009                                            | --- | ---       |
| 242407_at    | ---                                                                              | --- | ---       |
| 238674_at    | Transcribed locus                                                                | --- | ---       |
| 234184_at    | CDNA: FLJ21495 fis, clone COL05614                                               | --- | ---       |
| 231695_at    | ---                                                                              | --- | ---       |
| 215221_at    | CDNA: FLJ21411 fis, clone COL03986                                               | --- | ---       |
| 231038_s_at  | Transcribed locus, strongly similar to XP_001101257.1 similar to sterol regulato | --- | ---       |
| 1566809_a_at | CDNA clone IMAGE:5272727                                                         | --- | ---       |
| 1562598_at   | CDNA FLJ37010 fis, clone BRACE2009732                                            | --- | ---       |

|              |                                                      |     |           |
|--------------|------------------------------------------------------|-----|-----------|
| 239946_at    | Transcribed locus                                    | --- | ---       |
| 228032_s_at  | CDNA FLJ36663 fis, clone UTERU2002826                | --- | ---       |
| 1560070_at   | CDNA clone IMAGE:4828738                             | --- | ---       |
| 239231_at    | CDNA FLJ41910 fis, clone PEBLM2007834                | --- | ---       |
| 236659_x_at  | Transcribed locus                                    | --- | ---       |
| 236508_at    | Transcribed locus                                    | --- | ---       |
| 235756_at    | CDNA FLJ26187 fis, clone ADG04782                    | --- | ---       |
| 1563296_at   | Homo sapiens, clone IMAGE:5171352, mRNA              | --- | ---       |
| 1564444_at   | CDNA FLJ40178 fis, clone TESTI2017932                | --- | 100130264 |
| 1569129_s_at | Homo sapiens, clone IMAGE:4695648, mRNA              | --- | 285237    |
| 1570326_at   | CDNA clone IMAGE:4185545                             | --- | ---       |
| 242926_at    | Transcribed locus                                    | --- | ---       |
| 233152_x_at  | MRNA; cDNA DKFZp564C142 (from clone DKFZp564C142)    | --- | ---       |
| 241893_at    | Transcribed locus                                    | --- | ---       |
| 225722_at    | CDNA FLJ31233 fis, clone KIDNE2004579                | --- | ---       |
| 237999_at    | ---                                                  | --- | ---       |
| 242770_at    | CDNA FLJ44826 fis, clone BRACE3046762                | --- | 642236    |
| 1560135_at   | CDNA clone IMAGE:4822830                             | --- | ---       |
| 242878_at    | ---                                                  | --- | ---       |
| 240494_at    | Transcribed locus                                    | --- | ---       |
| 227293_at    | CDNA FLJ34052 fis, clone FCBBF3000175                | --- | ---       |
| 244086_at    | ---                                                  | --- | ---       |
| 216669_at    | ---                                                  | --- | ---       |
| 242025_at    | ---                                                  | --- | ---       |
| 215290_at    | Clone 24571 mRNA sequence                            | --- | ---       |
| 236961_at    | Transcribed locus                                    | --- | ---       |
| 216159_s_at  | CDNA FLJ13695 fis, clone PLACE2000124                | --- | ---       |
| 229934_at    | Mir-223 transcript variant 1 mRNA, complete sequence | --- | ---       |
| 1568656_at   | CDNA clone IMAGE:5265210                             | --- | ---       |
| 1562235_s_at | Transcribed locus                                    | --- | ---       |
| 216582_at    | ---                                                  | --- | 94026     |
| 239407_at    | CDNA clone IMAGE:4837199                             | --- | ---       |
| 243973_at    | Transcribed locus                                    | --- | ---       |
| 1570506_at   | Homo sapiens, clone IMAGE:4093039, mRNA              | --- | ---       |
| 241517_at    | ---                                                  | --- | ---       |
| 1570108_at   | CDNA clone IMAGE:4815481                             | --- | ---       |
| 233786_at    | CDNA FLJ10171 fis, clone HEMBA1003807                | --- | ---       |
| 1566426_at   | MRNA; cDNA DKFZp451O169 (from clone DKFZp451O169)    | --- | ---       |
| 234611_at    | CDNA clone IMAGE:4903661                             | --- | ---       |
| 241724_x_at  | Transcribed locus                                    | --- | ---       |
| 241654_at    | Transcribed locus                                    | --- | ---       |
| 1559735_at   | CDNA FLJ36035 fis, clone TESTI2017113                | --- | ---       |
| 233319_x_at  | CDNA FLJ13845 fis, clone THYRO1000815                | --- | ---       |
| 240869_at    | Full length insert cDNA clone ZE05A03                | --- | ---       |
| 1556835_s_at | CDNA clone IMAGE:5296106                             | --- | ---       |
| 1561199_at   | CDNA clone IMAGE:4831149                             | --- | ---       |
| 240727_s_at  | Transcribed locus                                    | --- | ---       |
| 233696_at    | CDNA: FLJ21357 fis, clone COL02835                   | --- | ---       |
| 244075_at    | Transcribed locus                                    | --- | ---       |
| 238145_at    | Transcribed locus                                    | --- | 84838     |
| 1556543_at   | Full length insert cDNA clone YW18F01                | --- | ---       |
| 242373_at    | Transcribed locus                                    | --- | ---       |
| 1564069_at   | CDNA FLJ36668 fis, clone UTERU2003926                | --- | ---       |
| 241764_at    | ---                                                  | --- | ---       |
| 1556385_at   | CDNA FLJ39926 fis, clone SPLEN2021157                | --- | ---       |
| 222341_x_at  | Transcribed locus                                    | --- | ---       |
| 238700_at    | Transcribed locus                                    | --- | ---       |
| 1555000_at   | OK/SW-CL.36                                          | --- | 100131077 |
| 1562289_at   | MRNA; cDNA DKFZp434N0220 (from clone DKFZp434N0220)  | --- | ---       |
| 214139_at    | ---                                                  | --- | ---       |
| 234425_at    | ---                                                  | --- | ---       |
| 244387_at    | Transcribed locus                                    | --- | ---       |
| 1553551_s_at | ---                                                  | --- | 4536      |

|              |                                                                                |     |           |
|--------------|--------------------------------------------------------------------------------|-----|-----------|
| 242975_s_at  | Transcribed locus                                                              | --- | ---       |
| 235917_at    | Transcribed locus                                                              | --- | ---       |
| 226343_at    | Transcribed locus, weakly similar to NP_689672.2 protein LOC146556 [Homo sa    | --- | ---       |
| 211976_at    | CDNA: FLJ22515 fis, clone HRC12122, highly similar to AF052101 Homo sapiens    | --- | ---       |
| 242461_at    | ---                                                                            | --- | ---       |
| 239775_at    | Transcribed locus                                                              | --- | 100131512 |
| 238191_at    | Transcribed locus                                                              | --- | ---       |
| 1564498_at   | ---                                                                            | --- | ---       |
| 1570631_at   | CDNA clone IMAGE:4826992                                                       | --- | ---       |
| 241435_at    | ---                                                                            | --- | ---       |
| 242526_at    | Transcribed locus                                                              | --- | ---       |
| 216175_at    | CDNA: FLJ21623 fis, clone COL07915                                             | --- | ---       |
| 242810_x_at  | ---                                                                            | --- | ---       |
| 1557410_at   | CDNA FLJ33271 fis, clone ASTRO2007666                                          | --- | ---       |
| 217614_at    | Transcribed locus                                                              | --- | ---       |
| 233218_at    | CDNA FLJ12177 fis, clone MAMMA1000720                                          | --- | ---       |
| 216644_at    | CDNA FLJ20178 fis, clone COL09990                                              | --- | ---       |
| 244520_at    | Transcribed locus                                                              | --- | ---       |
| 241581_at    | Transcribed locus                                                              | --- | ---       |
| 240442_at    | ---                                                                            | --- | ---       |
| 238536_at    | CDNA FLJ13474 fis, clone PLACE1003593                                          | --- | ---       |
| 244831_at    | Transcribed locus                                                              | --- | ---       |
| 224340_at    | ---                                                                            | --- | ---       |
| 241592_at    | Transcribed locus                                                              | --- | ---       |
| 239086_at    | Transcribed locus                                                              | --- | ---       |
| 216643_at    | MRNA, clone:RES4-16                                                            | --- | ---       |
| 1560509_at   | MRNA; cDNA DKFZp547H194 (from clone DKFZp547H194)                              | --- | ---       |
| 1561737_at   | MRNA; cDNA DKFZp667L064 (from clone DKFZp667L064)                              | --- | ---       |
| 1558236_at   | ---                                                                            | --- | ---       |
| 236506_at    | Transcribed locus                                                              | --- | ---       |
| 242059_at    | Transcribed locus                                                              | --- | ---       |
| 241993_x_at  | Transcribed locus                                                              | --- | ---       |
| 216173_at    | CDNA: FLJ21707 fis, clone COL09953                                             | --- | ---       |
| 1557276_at   | CDNA clone IMAGE:4828503                                                       | --- | ---       |
| 232410_at    | MRNA differentially expressed from human RPE cell in differential display expe | --- | ---       |
| 215628_x_at  | MRNA; cDNA DKFZp564M193 (from clone DKFZp564M193)                              | --- | ---       |
| 226457_at    | CDNA FLJ30340 fis, clone BRACE2007411                                          | --- | ---       |
| 230604_at    | Transcribed locus, moderately similar to XP_512041.1 similar to Myosin regulat | --- | ---       |
| 1567575_at   | Trapped 3' terminal exon, clone C2C4                                           | --- | ---       |
| 235808_at    | Transcribed locus                                                              | --- | ---       |
| 240255_at    | CDNA clone IMAGE:3625232                                                       | --- | ---       |
| 217637_at    | Full length insert cDNA clone ZE05A03                                          | --- | ---       |
| 230479_at    | Transcribed locus                                                              | --- | ---       |
| 240847_at    | Transcribed locus                                                              | --- | ---       |
| 228304_at    | Transcribed locus                                                              | --- | ---       |
| 1562432_at   | CDNA clone IMAGE:4794272                                                       | --- | ---       |
| 244335_at    | Transcribed locus                                                              | --- | ---       |
| 242171_at    | ---                                                                            | --- | ---       |
| 237924_at    | Transcribed locus                                                              | --- | ---       |
| 239603_x_at  | ---                                                                            | --- | ---       |
| 242032_at    | Transcribed locus                                                              | --- | 57498     |
| 233111_at    | CDNA FLJ13886 fis, clone THYRO1001559                                          | --- | ---       |
| 232592_at    | CDNA FLJ11982 fis, clone HEMBB1001335                                          | --- | ---       |
| 224549_x_at  | ---                                                                            | --- | ---       |
| 1566146_x_at | CDNA FLJ41018 fis, clone UTERU2018881                                          | --- | ---       |
| 1565823_at   | Transcribed locus                                                              | --- | ---       |
| 239069_s_at  | Transcribed locus, moderately similar to XP_517655.1 similar to KIAA0825 prot  | --- | ---       |
| 242693_at    | Transcribed locus                                                              | --- | ---       |
| 1570246_at   | CDNA clone IMAGE:4778480                                                       | --- | ---       |
| 1559332_at   | Homo sapiens, clone IMAGE:4108653, mRNA                                        | --- | ---       |
| 241096_at    | Transcribed locus                                                              | --- | ---       |
| 243236_at    | Transcribed locus                                                              | --- | ---       |
| 242068_at    | Transcribed locus                                                              | --- | ---       |



|              |                                                                               |     |           |
|--------------|-------------------------------------------------------------------------------|-----|-----------|
| 1566541_at   | MRNA; cDNA DKFZp761D2417 (from clone DKFZp761D2417)                           | --- | ---       |
| 1561558_at   | CDNA clone IMAGE:5561426                                                      | --- | ---       |
| 215553_x_at  | CDNA FLJ14253 fis, clone OVARC1001376                                         | --- | ---       |
| 240964_at    | Transcribed locus                                                             | --- | ---       |
| 238360_s_at  | CDNA clone IMAGE:5259979                                                      | --- | ---       |
| 238420_at    | CDNA clone IMAGE:5263531                                                      | --- | ---       |
| 1567997_x_at | ---                                                                           | --- | ---       |
| 231473_at    | Transcribed locus                                                             | --- | ---       |
| 215204_at    | CDNA FLJ14090 fis, clone MAMMA1000264                                         | --- | ---       |
| 238372_s_at  | Transcribed locus                                                             | --- | ---       |
| 239886_at    | Transcribed locus                                                             | --- | ---       |
| 233248_at    | CDNA FLJ11966 fis, clone HEMBB1001114                                         | --- | ---       |
| 225572_at    | CDNA FLJ34215 fis, clone FCBBF3021985                                         | --- | 1385      |
| 1560706_at   | MRNA; cDNA DKFZp667N1617 (from clone DKFZp667N1617)                           | --- | ---       |
| 228573_at    | Full-length cDNA clone CS0DD001YA12 of Neuroblastoma Cot 50-normalized of     | --- | ---       |
| 1558385_at   | ---                                                                           | --- | ---       |
| 238604_at    | CDNA FLJ25559 fis, clone JTH02834                                             | --- | ---       |
| 234991_at    | Transcribed locus, strongly similar to XP_001111447.1 transforming growth fac | --- | ---       |
| 235483_at    | CDNA FLJ30906 fis, clone FEBRA2006055                                         | --- | ---       |
| 227167_s_at  | Mesenchymal stem cell protein DSC96                                           | --- | ---       |
| 241887_at    | CDNA FLJ41537 fis, clone BRTHA2017985                                         | --- | ---       |
| 235174_s_at  | CDNA clone IMAGE:5286843                                                      | --- | 100128822 |
| 1566959_at   | MRNA; cDNA DKFZp564H023 (from clone DKFZp564H023)                             | --- | ---       |
| 202603_at    | Clone MO-30 mRNA sequence                                                     | --- | ---       |
| 226052_at    | Transcribed locus                                                             | --- | 23476     |
| 225221_at    | CDNA FLJ32068 fis, clone OCBBF1000114                                         | --- | ---       |
| 216006_at    | Clone 24694 mRNA sequence                                                     | --- | ---       |
| 234326_at    | CDNA: FLJ21248 fis, clone COL01235                                            | --- | ---       |
| 242827_x_at  | Transcribed locus                                                             | --- | ---       |
| 241774_at    | Transcribed locus                                                             | --- | ---       |
| 225567_at    | MRNA; cDNA DKFZp762E1314 (from clone DKFZp762E1314)                           | --- | ---       |
| 237289_at    | CDNA FLJ34215 fis, clone FCBBF3021985                                         | --- | 1385      |
| 237626_at    | Transcribed locus                                                             | --- | ---       |
| 222371_at    | MRNA; cDNA DKFZp686B1142 (from clone DKFZp686B1142)                           | --- | ---       |
| 243046_at    | Homo sapiens, clone IMAGE:4295366, mRNA                                       | --- | ---       |
| 227943_at    | ---                                                                           | --- | ---       |
| 239605_x_at  | Transcribed locus                                                             | --- | ---       |
| 241508_at    | ---                                                                           | --- | ---       |
| 240013_at    | Transcribed locus                                                             | --- | ---       |
| 243020_at    | Transcribed locus                                                             | --- | ---       |
| 236685_at    | Transcribed locus                                                             | --- | ---       |
| 241885_at    | Transcribed locus                                                             | --- | ---       |
| 229695_at    | CDNA FLJ39366 fis, clone PEBLM2006283                                         | --- | ---       |
| 238739_at    | ---                                                                           | --- | ---       |
| 229673_at    | Full-length cDNA clone CS0CAP006YP08 of Thymus of Homo sapiens (human)        | --- | ---       |
| 1555303_at   | ---                                                                           | --- | ---       |
| 243931_at    | Transcribed locus                                                             | --- | ---       |
| 235407_at    | Transcribed locus                                                             | --- | ---       |
| 238563_at    | Transcribed locus                                                             | --- | ---       |
| 241438_at    | Transcribed locus                                                             | --- | ---       |
| 234983_at    | Transcribed locus                                                             | --- | ---       |
| 228723_at    | CDNA FLJ30445 fis, clone BRACE2009238                                         | --- | ---       |
| 217521_at    | Transcribed locus                                                             | --- | ---       |
| 240019_at    | ---                                                                           | --- | ---       |
| 229699_at    | CDNA FLJ45384 fis, clone BRHIP3021987                                         | --- | 100129550 |
| 233010_at    | CDNA FLJ14313 fis, clone PLACE3000341                                         | --- | ---       |
| 228869_at    | Transcribed locus                                                             | --- | ---       |
| 239764_at    | MRNA; cDNA DKFZp686D1113 (from clone DKFZp686D1113)                           | --- | ---       |
| 230795_at    | Transcribed locus                                                             | --- | ---       |
| 238469_at    | MRNA full length insert cDNA clone EUROIMAGE 1509279                          | --- | 79627     |
| 1560869_a_at | Full length insert cDNA clone YQ50C11                                         | --- | ---       |
| 242403_at    | Transcribed locus                                                             | --- | ---       |
| 242556_at    | ---                                                                           | --- | ---       |

|              |                                                                             |     |           |
|--------------|-----------------------------------------------------------------------------|-----|-----------|
| 224778_s_at  | CDNA clone IMAGE:5263531                                                    | --- | ---       |
| 227278_at    | ---                                                                         | --- | ---       |
| 229128_s_at  | Transcribed locus                                                           | --- | 81611     |
| 244648_at    | Transcribed locus                                                           | --- | ---       |
| 231552_at    | Transcribed locus                                                           | --- | ---       |
| 235324_at    | Transcribed locus                                                           | --- | 6428      |
| 1556942_at   | MRNA; cDNA DKFZp686E0813 (from clone DKFZp686E0813)                         | --- | ---       |
| 226873_at    | CDNA clone IMAGE:4794011                                                    | --- | ---       |
| 203704_s_at  | ---                                                                         | --- | 6239      |
| 1560622_at   | CDNA FLJ20196 fis, clone COLF0944                                           | --- | ---       |
| 242725_at    | CDNA FLJ42225 fis, clone THYMU2040427                                       | --- | ---       |
| 215191_at    | CDNA FLJ14085 fis, clone HEMBB1002534                                       | --- | ---       |
| 227356_at    | CDNA: FLJ22198 fis, clone HRC01218                                          | --- | ---       |
| 228812_at    | Transcribed locus                                                           | --- | ---       |
| 230304_at    | CDNA clone IMAGE:30332316                                                   | --- | ---       |
| 239646_at    | Transcribed locus                                                           | --- | ---       |
| 232628_at    | CDNA FLJ13464 fis, clone PLACE1003478                                       | --- | ---       |
| 241924_at    | Transcribed locus                                                           | --- | ---       |
| 213532_at    | ---                                                                         | --- | 6868      |
| 240165_at    | Transcribed locus                                                           | --- | ---       |
| 226277_at    | CDNA FLJ43397 fis, clone OCBBF2009788                                       | --- | 10087     |
| 222058_at    | ---                                                                         | --- | ---       |
| 225227_at    | CDNA clone IMAGE:5299642                                                    | --- | ---       |
| 227501_at    | Transcribed locus                                                           | --- | ---       |
| 239798_at    | Transcribed locus                                                           | --- | ---       |
| 1569952_x_at | CDNA clone IMAGE:4814292                                                    | --- | ---       |
| 212952_at    | Transcribed locus                                                           | --- | ---       |
| 241867_at    | Transcribed locus                                                           | --- | ---       |
| 1558448_a_at | CDNA FLJ35687 fis, clone SPLEN2019349                                       | --- | 100128439 |
| 236198_at    | Transcribed locus                                                           | --- | ---       |
| 244087_at    | Transcribed locus                                                           | --- | ---       |
| 225239_at    | CDNA FLJ26120 fis, clone SYN00419                                           | --- | ---       |
| 236322_at    | Transcribed locus                                                           | --- | ---       |
| 224769_at    | CDNA clone IMAGE:5263531                                                    | --- | ---       |
| 229460_at    | CDNA FLJ37917 fis, clone CTONG1000137                                       | --- | ---       |
| 235242_at    | CDNA FLJ41375 fis, clone BRCAN2007700                                       | --- | ---       |
| 235589_s_at  | Transcribed locus                                                           | --- | 4194      |
| 244219_at    | Transcribed locus                                                           | --- | ---       |
| 1566901_at   | MRNA; cDNA DKFZp667F2113 (from clone DKFZp667F2113)                         | --- | 7050      |
| 244598_at    | Full length insert cDNA clone ZD66F04                                       | --- | ---       |
| 234632_x_at  | CDNA: FLJ22614 fis, clone HSI05089                                          | --- | ---       |
| 229455_at    | Full length insert cDNA clone YZ04E02                                       | --- | ---       |
| 240439_at    | ---                                                                         | --- | ---       |
| 226190_at    | Homo sapiens, clone IMAGE:4294444, mRNA                                     | --- | ---       |
| 237768_x_at  | ---                                                                         | --- | ---       |
| 235716_at    | Transcribed locus                                                           | --- | ---       |
| 228582_x_at  | Transcribed locus                                                           | --- | ---       |
| 213817_at    | CDNA FLJ13601 fis, clone PLACE1010069                                       | --- | ---       |
| 226441_at    | CDNA FLJ36574 fis, clone TRACH2012376                                       | --- | ---       |
| 243465_at    | CDNA FLJ32348 fis, clone PROST2007200                                       | --- | ---       |
| 227755_at    | CDNA clone IMAGE:4077090                                                    | --- | ---       |
| 236402_at    | CDNA FLJ42263 fis, clone TKIDN2014570                                       | --- | ---       |
| 228188_at    | ---                                                                         | --- | 2355      |
| 227851_s_at  | Transcribed locus                                                           | --- | ---       |
| 239287_at    | Transcribed locus                                                           | --- | ---       |
| 222111_at    | CDNA clone IMAGE:4794011                                                    | --- | ---       |
| 224603_at    | CDNA clone IMAGE:3831740                                                    | --- | ---       |
| 229410_at    | MRNA; cDNA DKFZp564G0462 (from clone DKFZp564G0462)                         | --- | 79939     |
| 226556_at    | Homo sapiens, clone IMAGE:4294444, mRNA                                     | --- | ---       |
| 228528_at    | CDNA FLJ41270 fis, clone BRAMY2036387                                       | --- | ---       |
| 227044_at    | Full-length cDNA clone CSODI009YA14 of Placenta Cot 25-normalized of Homo s | --- | ---       |
| 232002_at    | MRNA; cDNA DKFZp547I084 (from clone DKFZp547I084)                           | --- | ---       |
| 229814_at    | Transcribed locus                                                           | --- | ---       |

|             |                                                                                   |     |           |
|-------------|-----------------------------------------------------------------------------------|-----|-----------|
| 226397_s_at | Transcribed locus                                                                 | --- | ---       |
| 243675_at   | Transcribed locus                                                                 | --- | ---       |
| 244677_at   | Transcribed locus                                                                 | --- | ---       |
| 241824_at   | Transcribed locus                                                                 | --- | ---       |
| 213700_s_at | Transcribed locus                                                                 | --- | ---       |
| 226146_at   | CDNA clone IMAGE:5294560                                                          | --- | ---       |
| 225950_at   | Transcribed locus                                                                 | --- | ---       |
| 213396_s_at | Full-length cDNA clone CS0DJ012YG05 of T cells (Jurkat cell line) Cot 10-normali; | --- | ---       |
| 226348_at   | ---                                                                               | --- | ---       |
| 1558783_at  | CDNA: FLJ21152 fis, clone CAS09594                                                | --- | ---       |
| 227368_at   | Transcribed locus, moderately similar to XP_001091208.1 hypothetical protein      | --- | ---       |
| 231972_at   | CDNA: FLJ21028 fis, clone CAE07155                                                | --- | ---       |
| 232094_at   | CDNA FLJ11404 fis, clone HEMBA1000749                                             | --- | 79768     |
| 201295_s_at | ---                                                                               | --- | 26118     |
| 225750_at   | CDNA FLJ14162 fis, clone NT2RM4002504                                             | --- | ---       |
| 236495_at   | Transcribed locus                                                                 | --- | ---       |
| 239619_at   | ---                                                                               | --- | ---       |
| 226347_at   | ---                                                                               | --- | ---       |
| 236180_at   | Transcribed locus                                                                 | --- | ---       |
| 237890_at   | Transcribed locus                                                                 | --- | ---       |
| 232072_at   | ---                                                                               | --- | ---       |
| 242375_x_at | ---                                                                               | --- | ---       |
| 1561486_at  | MRNA; cDNA DKFZp666M193 (from clone DKFZp666M193)                                 | --- | ---       |
| 1560156_at  | Homo sapiens, clone IMAGE:5735420, mRNA                                           | --- | ---       |
| 236825_at   | Transcribed locus                                                                 | --- | ---       |
| 1563473_at  | MRNA; cDNA DKFZp761L0320 (from clone DKFZp761L0320)                               | --- | ---       |
| 225274_at   | Transcribed locus                                                                 | --- | 51449     |
| 243626_at   | Transcribed locus, moderately similar to XP_497913.3 similar to alpha 3 type VI   | --- | ---       |
| 241353_s_at | Transcribed locus, strongly similar to XP_531081.2 hypothetical protein [Pan trc  | --- | 100134560 |
| 228107_at   | ---                                                                               | --- | 100127983 |
| 1563841_at  | MRNA; cDNA DKFZp547I2317 (from clone DKFZp547I2317)                               | --- | ---       |
| 232656_at   | CDNA FLJ11692 fis, clone HEMBA1004983                                             | --- | ---       |
| 235530_at   | CDNA FLJ38922 fis, clone NT2NE2011691                                             | --- | ---       |
| 64488_at    | CDNA FLJ38849 fis, clone MESAN2008936                                             | --- | ---       |
| 1560102_at  | Transcribed locus                                                                 | --- | ---       |
| 239124_at   | Transcribed locus                                                                 | --- | ---       |
| 230631_s_at | Full-length cDNA clone CS0DI051YA02 of Placenta Cot 25-normalized of Homo s       | --- | ---       |
| 236132_at   | ---                                                                               | --- | 7094      |
| 216782_at   | CDNA: FLJ23492 fis, clone LNG01731                                                | --- | ---       |
| 244373_at   | Transcribed locus                                                                 | --- | ---       |
| 1558447_at  | CDNA FLJ35687 fis, clone SPLEN2019349                                             | --- | 100128439 |
| 243641_at   | Transcribed locus, moderately similar to XP_517655.1 similar to KIAA0825 prot     | --- | ---       |
| 244600_at   | Transcribed locus, strongly similar to XP_001157267.1 hypothetical protein [Pa    | --- | ---       |
| 237154_at   | Transcribed locus                                                                 | --- | ---       |
| 232472_at   | CDNA FLJ12399 fis, clone MAMMA1002780                                             | --- | ---       |
| 244000_at   | CDNA FLJ14364 fis, clone HEMBA1000918                                             | --- | ---       |
| 244447_at   | Transcribed locus                                                                 | --- | ---       |
| 236480_at   | CDNA FLJ41489 fis, clone BRTHA2004582                                             | --- | ---       |
| 230710_at   | CDNA FLJ41489 fis, clone BRTHA2004582                                             | --- | ---       |
| 236474_at   | Transcribed locus                                                                 | --- | ---       |
| 243355_at   | Transcribed locus, strongly similar to XP_001095858.1 aspartyl-tRNA synthetas     | --- | 100131316 |
| 1570329_at  | Homo sapiens, clone IMAGE:4853422, mRNA                                           | --- | ---       |
| 232286_at   | CDNA FLJ12187 fis, clone MAMMA1000831                                             | --- | ---       |
| 238228_at   | ---                                                                               | --- | ---       |
| 239401_at   | Transcribed locus                                                                 | --- | ---       |
| 232225_at   | CDNA FLJ11764 fis, clone HEMBA1005685                                             | --- | ---       |
| 242758_x_at | Transcribed locus                                                                 | --- | 55818     |
| 231099_at   | MRNA; cDNA DKFZp547C072 (from clone DKFZp547C072)                                 | --- | ---       |
| 231233_at   | ---                                                                               | --- | ---       |
| 238656_at   | Transcribed locus                                                                 | --- | ---       |
| 243246_at   | Transcribed locus                                                                 | --- | ---       |
| 1564227_at  | CDNA: FLJ21299 fis, clone COL02041                                                | --- | ---       |
| 240266_at   | Transcribed locus                                                                 | --- | ---       |

|              |                                                                                |     |        |
|--------------|--------------------------------------------------------------------------------|-----|--------|
| 217606_at    | MRNA; cDNA DKFZp686P24158 (from clone DKFZp686P24158)                          | --- | ---    |
| 236915_at    | ---                                                                            | --- | 441054 |
| 244049_at    | ---                                                                            | --- | ---    |
| 234288_at    | MRNA; cDNA DKFZp434P0626 (from clone DKFZp434P0626)                            | --- | ---    |
| 1556806_at   | Clone TEA5 Cri-du-chat critical region mRNA                                    | --- | ---    |
| 237764_at    | Transcribed locus                                                              | --- | ---    |
| 236423_at    | Transcribed locus                                                              | --- | ---    |
| 240991_at    | Transcribed locus                                                              | --- | ---    |
| 1557852_at   | CDNA FLJ31245 fis, clone KIDNE2005062                                          | --- | ---    |
| 239315_at    | ---                                                                            | --- | 285966 |
| 229242_at    | Transcribed locus                                                              | --- | ---    |
| 233506_at    | Full length insert cDNA clone ZB81B12                                          | --- | ---    |
| 225880_at    | CDNA FLJ11174 fis, clone PLACE1007367                                          | --- | ---    |
| 232835_at    | Transcribed locus                                                              | --- | ---    |
| 37590_g_at   | MRNA full length insert cDNA clone EUROIMAGE 375854 /// MRNA full length ir    | --- | ---    |
| 230856_at    | Transcribed locus                                                              | --- | ---    |
| 227854_at    | Transcribed locus, strongly similar to XP_001115119.1 similar to Fanconi anemi | --- | ---    |
| 244548_at    | Full length insert cDNA clone YP77A07                                          | --- | ---    |
| 239130_at    | ---                                                                            | --- | ---    |
| 216683_at    | MRNA; cDNA DKFZp761P1114 (from clone DKFZp761P1114)                            | --- | ---    |
| 235901_at    | Transcribed locus                                                              | --- | ---    |
| 242281_at    | ---                                                                            | --- | 2752   |
| 237239_at    | Transcribed locus                                                              | --- | ---    |
| 217664_at    | Transcribed locus                                                              | --- | ---    |
| 1569911_at   | Homo sapiens, clone IMAGE:3884408, mRNA                                        | --- | ---    |
| 235523_at    | Transcribed locus                                                              | --- | ---    |
| 1557727_at   | ---                                                                            | --- | 400960 |
| 228828_at    | Homo sapiens, clone IMAGE:5215917, mRNA                                        | --- | ---    |
| 243469_at    | Transcribed locus                                                              | --- | ---    |
| 238042_at    | Transcribed locus                                                              | --- | ---    |
| 230076_at    | ---                                                                            | --- | 83394  |
| 241590_at    | ---                                                                            | --- | ---    |
| 234569_at    | MRNA; cDNA DKFZp434F0472 (from clone DKFZp434F0472)                            | --- | ---    |
| 233705_at    | CDNA: FLJ21454 fis, clone COL04629                                             | --- | ---    |
| 225553_at    | CDNA FLJ12874 fis, clone NT2RP2003769                                          | --- | ---    |
| 1556865_at   | Clone IMAGE:121600 mRNA sequence                                               | --- | ---    |
| 1569681_at   | CDNA clone IMAGE:5209417                                                       | --- | ---    |
| 1568408_x_at | ---                                                                            | --- | ---    |
| 242786_at    | Full-length cDNA clone CS0DK010YC18 of HeLa cells Cot 25-normalized of Homc    | --- | ---    |
| 1557505_a_at | Full length insert cDNA YQ11E04                                                | --- | ---    |
| 243482_at    | Transcribed locus                                                              | --- | ---    |
| 244349_at    | Transcribed locus                                                              | --- | ---    |
| 244781_x_at  | Transcribed locus                                                              | --- | ---    |
| 228105_at    | Transcribed locus                                                              | --- | ---    |
| 228244_at    | CDNA clone IMAGE:5736961                                                       | --- | 388552 |
| 240949_x_at  | Transcribed locus                                                              | --- | ---    |
| 1557117_at   | CDNA clone IMAGE:4812643                                                       | --- | ---    |
| 230683_at    | CDNA: FLJ20892 fis, clone ADKA03430                                            | --- | 140731 |
| 234838_at    | Pregnancy-induced hypertension syndrome-related protein (PIH1)                 | --- | ---    |
| 240621_at    | ---                                                                            | --- | ---    |
| 235448_at    | CDNA FLJ36477 fis, clone THYMU2017158                                          | --- | ---    |
| 239923_at    | Transcribed locus                                                              | --- | ---    |
| 217625_x_at  | Homo sapiens, clone IMAGE:3851018, mRNA                                        | --- | ---    |
| 242137_at    | CDNA FLJ36544 fis, clone TRACH2006378                                          | --- | ---    |
| 235288_at    | Transcribed locus                                                              | --- | ---    |
| 1558695_at   | Full length insert cDNA clone YR58H12                                          | --- | ---    |
| 240608_at    | ---                                                                            | --- | ---    |
| 239276_at    | Transcribed locus                                                              | --- | ---    |
| 223478_at    | ---                                                                            | --- | 26521  |
| 238289_at    | ---                                                                            | --- | ---    |
| 224109_at    | ---                                                                            | --- | ---    |
| 1563386_at   | MRNA full length insert cDNA clone EUROIMAGE 1204612                           | --- | ---    |
| 1566777_at   | CDNA clone IMAGE:5294798                                                       | --- | ---    |

|              |                                                                                 |     |           |
|--------------|---------------------------------------------------------------------------------|-----|-----------|
| 1556105_at   | CDNA FLJ41020 fis, clone UTERU2019163                                           | --- | ---       |
| 237943_at    | ---                                                                             | --- | 100129701 |
| 243729_at    | CDNA FLJ37931 fis, clone CTONG2004397                                           | --- | ---       |
| 1560297_at   | Homo sapiens, clone IMAGE:4043205, mRNA                                         | --- | ---       |
| 233266_at    | CDNA FLJ13844 fis, clone THYRO1000805                                           | --- | ---       |
| 1566762_at   | CDNA clone IMAGE:5277680                                                        | --- | ---       |
| 1565836_at   | CDNA FLJ39181 fis, clone OCBBF2004235                                           | --- | ---       |
| 242638_at    | CDNA FLJ27401 fis, clone WMC03071                                               | --- | ---       |
| 230346_x_at  | Transcribed locus, strongly similar to XP_520119.1 similar to CDC28 protein kin | --- | ---       |
| 1569444_at   | CDNA clone IMAGE:4294904                                                        | --- | ---       |
| 239825_at    | Transcribed locus                                                               | --- | ---       |
| 1565192_at   | CDNA clone IMAGE:3829636                                                        | --- | ---       |
| 233233_at    | Mesenchymal stem cell protein DSC96                                             | --- | ---       |
| 240712_s_at  | Transcribed locus                                                               | --- | ---       |
| 233707_at    | CDNA FLJ14174 fis, clone NT2RP2002843                                           | --- | ---       |
| 236698_at    | Full-length cDNA clone CS0DF025YA01 of Fetal brain of Homo sapiens (human)      | --- | ---       |
| 1562665_at   | CDNA FLJ25595 fis, clone JTH13269                                               | --- | ---       |
| 243041_s_at  | Transcribed locus                                                               | --- | 27303     |
| 243745_at    | Transcribed locus                                                               | --- | ---       |
| 243018_at    | Transcribed locus, moderately similar to XP_945958.1 hypothetical protein XP_   | --- | ---       |
| 241831_at    | Transcribed locus                                                               | --- | ---       |
| 235658_at    | Transcribed locus                                                               | --- | ---       |
| 1566097_at   | MRNA; cDNA DKFZp761K02121 (from clone DKFZp761K02121)                           | --- | ---       |
| 215477_at    | MRNA sequence, IMAGE clone 446411                                               | --- | ---       |
| 1563884_at   | CDNA FLJ23675 fis, clone HEP08462                                               | --- | ---       |
| 1557814_a_at | Full length insert cDNA clone YB34C04                                           | --- | ---       |
| 230209_at    | CDNA FLJ36477 fis, clone THYMU2017158                                           | --- | ---       |
| 235104_at    | ---                                                                             | --- | 64167     |
| 237149_at    | ---                                                                             | --- | ---       |
| 1561432_at   | CDNA clone IMAGE:4830514                                                        | --- | ---       |
| 228081_at    | CDNA FLJ35319 fis, clone PROST2011577                                           | --- | 901       |
| 1569263_at   | Pp10472                                                                         | --- | ---       |
| 221937_at    | CDNA FLJ34482 fis, clone HLUNG2004067                                           | --- | ---       |
| 237886_at    | Transcribed locus                                                               | --- | ---       |
| 235133_at    | Homo sapiens, clone IMAGE:5787583, mRNA                                         | --- | ---       |
| 241048_at    | Transcribed locus                                                               | --- | ---       |
| 231483_at    | Transcribed locus, moderately similar to XP_001149380.1 hypothetical protein    | --- | ---       |
| 1566868_at   | Homo sapiens, clone IMAGE:4158072, mRNA                                         | --- | ---       |
| 233273_at    | CDNA FLJ12010 fis, clone HEMBB1001635                                           | --- | ---       |
| 223848_at    | Clone FLC0664 PRO2866                                                           | --- | 100129198 |
| 237608_at    | CDNA clone IMAGE:4830853                                                        | --- | ---       |
| 227264_at    | CDNA FLJ46539 fis, clone THYMU3037836                                           | --- | ---       |
| 238521_at    | Transcribed locus                                                               | --- | ---       |
| 1561740_at   | MRNA; cDNA DKFZp667A1719 (from clone DKFZp667A1719)                             | --- | ---       |
| 231329_at    | Transcribed locus                                                               | --- | ---       |
| 234670_at    | CDNA: FLJ23600 fis, clone LNG15477                                              | --- | ---       |
| 239721_at    | ---                                                                             | --- | ---       |
| 243395_at    | Transcribed locus                                                               | --- | ---       |
| 237243_at    | Transcribed locus                                                               | --- | ---       |
| 240468_at    | Transcribed locus                                                               | --- | ---       |
| 233778_at    | Uncharacterized gastric protein ZG16P                                           | --- | ---       |
| 229833_at    | CDNA FLJ90099 fis, clone HEMBA1006016                                           | --- | ---       |
| 1568878_at   | Homo sapiens, clone IMAGE:5556045, mRNA                                         | --- | ---       |
| 1556416_s_at | Full length insert cDNA clone ZD37D10                                           | --- | ---       |
| 241873_at    | Homo sapiens, clone IMAGE:5209126, mRNA                                         | --- | ---       |
| 236261_at    | CDNA FLJ41254 fis, clone BRAMY2033594                                           | --- | 114880    |
| 227422_at    | ---                                                                             | --- | ---       |
| 1564479_a_at | CDNA FLJ37609 fis, clone BRCOC2011010                                           | --- | ---       |
| 236300_at    | CDNA FLJ37884 fis, clone BRSTN2012451                                           | --- | ---       |
| 1559452_a_at | MRNA; cDNA DKFZp547L2215 (from clone DKFZp547L2215)                             | --- | ---       |
| 241657_at    | Transcribed locus                                                               | --- | ---       |
| 241278_at    | ---                                                                             | --- | ---       |
| 215811_at    | Clone GLSH-3 similar to gliadin mRNA sequence                                   | --- | ---       |

|              |                                                                               |     |           |
|--------------|-------------------------------------------------------------------------------|-----|-----------|
| 228045_at    | MRNA; cDNA DKFZp451K063 (from clone DKFZp451K063)                             | --- | ---       |
| 1562821_a_at | M41 mRNA, complete sequence; alternatively spliced                            | --- | ---       |
| 243154_at    | Transcribed locus                                                             | --- | ---       |
| 241780_at    | Transcribed locus                                                             | --- | ---       |
| 236843_at    | Transcribed locus                                                             | --- | ---       |
| 1568858_at   | Homo sapiens, clone IMAGE:4157587, mRNA                                       | --- | ---       |
| 1558587_at   | Homo sapiens, clone IMAGE:5728941, mRNA                                       | --- | ---       |
| 1568648_a_at | CDNA clone IMAGE:4426835                                                      | --- | ---       |
| 220701_at    | ---                                                                           | --- | ---       |
| 224103_at    | Clone FLB1825 PRO0419                                                         | --- | 100132661 |
| 236215_at    | ---                                                                           | --- | ---       |
| 1566892_at   | MRNA; cDNA DKFZp667B1113 (from clone DKFZp667B1113)                           | --- | ---       |
| 242193_at    | CDNA clone IMAGE:4797645                                                      | --- | 100130155 |
| 239494_at    | Transcribed locus                                                             | --- | ---       |
| 237479_at    | Transcribed locus                                                             | --- | ---       |
| 1560026_at   | CDNA clone IMAGE:5285703                                                      | --- | ---       |
| 237454_at    | Transcribed locus                                                             | --- | ---       |
| 1555261_at   | MRNA; cDNA DKFZp547A2015 (from clone DKFZp547A2015)                           | --- | ---       |
| 239339_at    | Transcribed locus                                                             | --- | ---       |
| 230744_at    | Transcribed locus                                                             | --- | ---       |
| 1563467_at   | MRNA; cDNA DKFZp451G0810 (from clone DKFZp451G0810)                           | --- | ---       |
| 241588_at    | ---                                                                           | --- | ---       |
| 239868_at    | MRNA; cDNA DKFZp686E08116 (from clone DKFZp686E08116)                         | --- | ---       |
| 235801_at    | ---                                                                           | --- | ---       |
| 1559462_at   | Homo sapiens, clone IMAGE:6155889, mRNA                                       | --- | ---       |
| 217706_at    | Transcribed locus                                                             | --- | ---       |
| 233481_at    | MRNA; cDNA DKFZp566O1624 (from clone DKFZp566O1624)                           | --- | ---       |
| 1562860_at   | Homo sapiens, clone IMAGE:5744121, mRNA                                       | --- | ---       |
| 238552_at    | Transcribed locus, strongly similar to XP_001089287.1 serine/threonine kinase | --- | ---       |
| 241974_at    | Transcribed locus                                                             | --- | ---       |
| 237821_at    | Transcribed locus                                                             | --- | ---       |
| 235938_at    | Transcribed locus                                                             | --- | ---       |
| 1554971_at   | OK/SW-CL.58                                                                   | --- | 100131766 |
| 1562473_at   | CDNA clone IMAGE:5285657                                                      | --- | ---       |
| 235124_at    | CDNA FLJ35228 fis, clone PROST2001283                                         | --- | 645212    |
| 232307_at    | CDNA FLJ11492 fis, clone HEMBA1001939                                         | --- | ---       |
| 1566772_at   | MRNA; cDNA DKFZp547L1918 (from clone DKFZp547L1918)                           | --- | ---       |
| 1555489_at   | ---                                                                           | --- | ---       |
| 239449_at    | Transcribed locus                                                             | --- | ---       |
| 244397_at    | ---                                                                           | --- | ---       |
| 1556956_at   | CDNA FLJ33365 fis, clone BRACE2005460, moderately similar to Xenopus laevis   | --- | 375616    |
| 239033_at    | MRNA; cDNA DKFZp666M079 (from clone DKFZp666M079)                             | --- | ---       |
| 243936_x_at  | ---                                                                           | --- | ---       |
| 244372_at    | Transcribed locus                                                             | --- | ---       |
| 230241_at    | Transcribed locus                                                             | --- | ---       |
| 233413_at    | CDNA FLJ13457 fis, clone PLACE1003343                                         | --- | ---       |
| 232583_at    | CDNA FLJ11435 fis, clone HEMBA1001208                                         | --- | ---       |
| 1561213_at   | CDNA clone IMAGE:5272066                                                      | --- | ---       |
| 234160_at    | CDNA: FLJ21671 fis, clone COL09015                                            | --- | ---       |
| 235609_at    | Transcribed locus                                                             | --- | ---       |
| 216704_at    | MRNA; cDNA DKFZp761P1114 (from clone DKFZp761P1114)                           | --- | ---       |
| 234839_at    | MRNA; cDNA DKFZp564I103 (from clone DKFZp564I103)                             | --- | ---       |
| 236338_at    | ---                                                                           | --- | ---       |
| 210893_at    | PRO1510                                                                       | --- | ---       |
| 239806_at    | Transcribed locus                                                             | --- | ---       |
| 229291_at    | Full length insert cDNA clone ZD86A03                                         | --- | ---       |
| 231440_at    | CDNA clone IMAGE:4824725                                                      | --- | 100131928 |
| 217091_at    | ---                                                                           | --- | ---       |
| 238985_at    | ---                                                                           | --- | ---       |
| 231127_at    | Transcribed locus                                                             | --- | ---       |
| 1562406_at   | CDNA clone IMAGE:5278001                                                      | --- | ---       |
| 1561144_at   | Full length insert cDNA clone ZD43A10                                         | --- | ---       |
| 230768_at    | Transcribed locus                                                             | --- | ---       |

|              |                                                                                   |     |       |
|--------------|-----------------------------------------------------------------------------------|-----|-------|
| 1561654_at   | Full length insert cDNA clone YT87E05                                             | --- | ---   |
| 233659_at    | Clone IMAGE:241742, mRNA sequence                                                 | --- | ---   |
| 229756_at    | Transcribed locus, strongly similar to XP_515285.1 similar to inhibitor of DNA bi | --- | ---   |
| 1561962_at   | CDNA clone IMAGE:4794289                                                          | --- | ---   |
| 1558497_a_at | Homo sapiens, clone IMAGE:5167229, mRNA                                           | --- | ---   |
| 1564763_at   | (clone Z145) retinal mRNA, repeat region                                          | --- | ---   |
| 222315_at    | Transcribed locus                                                                 | --- | ---   |
| 240093_x_at  | Transcribed locus                                                                 | --- | ---   |
| 240415_at    | Transcribed locus                                                                 | --- | ---   |
| 1560926_at   | Full length insert cDNA clone YR43G06                                             | --- | ---   |
| 237420_at    | ---                                                                               | --- | 57489 |
| 240358_at    | Transcribed locus                                                                 | --- | ---   |
| 242485_at    | Transcribed locus                                                                 | --- | ---   |
| 235659_at    | Transcribed locus                                                                 | --- | ---   |
| 1559213_at   | Homo sapiens, clone IMAGE:5394246, mRNA                                           | --- | ---   |
| 1561239_at   | CDNA clone IMAGE:4825737                                                          | --- | ---   |
| 226107_at    | CDNA FLJ13495 fis, clone PLACE1004425 /// Full-length cDNA clone CSODI084Yf       | --- | ---   |
| 214101_s_at  | Transcribed locus                                                                 | --- | ---   |
| 1559992_a_at | Homo sapiens, clone IMAGE:5733926, mRNA                                           | --- | ---   |
| 1561260_at   | CDNA clone IMAGE:5295565                                                          | --- | ---   |
| 236394_at    | ---                                                                               | --- | ---   |
| 244153_at    | ---                                                                               | --- | 7756  |
| 238719_at    | Transcribed locus                                                                 | --- | ---   |
| 236035_at    | Transcribed locus                                                                 | --- | ---   |
| 240178_at    | ---                                                                               | --- | ---   |
| 1559696_at   | Full length insert cDNA clone YW24B11                                             | --- | ---   |
| 233090_at    | CDNA FLJ11419 fis, clone HEMBA1000985                                             | --- | ---   |
| 243694_at    | ---                                                                               | --- | ---   |
| 244306_at    | Transcribed locus                                                                 | --- | ---   |
| 216575_at    | ---                                                                               | --- | ---   |
| 232769_at    | CDNA FLJ10258 fis, clone HEMBB1000908                                             | --- | ---   |
| 1567076_at   | ---                                                                               | --- | ---   |
| 232468_at    | CDNA FLJ13708 fis, clone PLACE2000359                                             | --- | ---   |
| 235570_at    | CDNA FLJ36544 fis, clone TRACH2006378                                             | --- | ---   |
| 1559530_at   | CDNA clone IMAGE:5736961                                                          | --- | ---   |
| 228567_at    | CDNA FLJ38388 fis, clone FEBRA2004485                                             | --- | ---   |
| 239476_at    | CDNA FLJ36491 fis, clone THYMU2018197                                             | --- | ---   |
| 1556486_at   | CDNA clone IMAGE:4825811                                                          | --- | ---   |
| 236384_at    | CDNA FLJ32162 fis, clone PLACE6000325                                             | --- | ---   |
| 1558494_at   | Homo sapiens, clone IMAGE:5171606, mRNA                                           | --- | ---   |
| 220877_at    | ---                                                                               | --- | ---   |
| 244705_at    | CDNA FLJ33356 fis, clone BRACE2005160                                             | --- | ---   |
| 1556392_a_at | CDNA clone IMAGE:5285271                                                          | --- | ---   |
| 237444_at    | Transcribed locus                                                                 | --- | ---   |
| 225923_at    | CDNA FLJ41394 fis, clone BRCAN2026197                                             | --- | ---   |
| 241883_x_at  | ---                                                                               | --- | ---   |
| 239758_at    | ---                                                                               | --- | ---   |
| 233003_at    | CDNA FLJ11942 fis, clone HEMBB1000652                                             | --- | ---   |
| 239606_at    | CDNA FLJ25345 fis, clone TST01118                                                 | --- | ---   |
| 242058_at    | ---                                                                               | --- | ---   |
| 233035_at    | CDNA FLJ12023 fis, clone HEMBB1001785                                             | --- | ---   |
| 241515_at    | ---                                                                               | --- | ---   |
| 1568844_at   | CDNA clone IMAGE:4826156                                                          | --- | ---   |
| 1566805_at   | CDNA: FLJ20879 fis, clone ADKA03124                                               | --- | ---   |
| 1563190_at   | CDNA clone IMAGE:4828264                                                          | --- | ---   |
| 1569944_at   | CDNA clone IMAGE:5311876                                                          | --- | ---   |
| 236861_at    | ---                                                                               | --- | ---   |
| 237122_at    | Transcribed locus                                                                 | --- | ---   |
| 1566342_at   | Transcribed locus                                                                 | --- | ---   |
| 233731_at    | MRNA; cDNA DKFZp564D123 (from clone DKFZp564D123)                                 | --- | ---   |
| 233799_at    | CDNA FLJ11418 fis, clone HEMBA1000972                                             | --- | ---   |
| 1561418_at   | Homo sapiens, clone IMAGE:5403381, mRNA                                           | --- | ---   |
| 1562949_at   | CDNA clone IMAGE:5273211                                                          | --- | ---   |

|              |                                                                             |     |           |
|--------------|-----------------------------------------------------------------------------|-----|-----------|
| 238999_at    | Transcribed locus                                                           | --- | ---       |
| 243367_at    | Transcribed locus                                                           | --- | ---       |
| 237904_at    | Transcribed locus                                                           | --- | ---       |
| 235651_at    | ---                                                                         | --- | ---       |
| 226085_at    | CDNA clone IMAGE:4842353                                                    | --- | 23468     |
| 1556306_at   | Chromosome 7 unknown mRNA                                                   | --- | ---       |
| 211973_at    | AF034176 Human mRNA (Tripodis and Ragoussis) Homo sapiens cDNA clone ntc    | --- | ---       |
| 1556321_a_at | MRNA full length insert cDNA clone EUROIMAGE 283668                         | --- | ---       |
| 232797_at    | CDNA FLJ11397 fis, clone HEMBA1000622                                       | --- | ---       |
| 1564965_at   | MRNA; cDNA DKFZp666M1310 (from clone DKFZp666M1310)                         | --- | ---       |
| 235513_at    | Transcribed locus                                                           | --- | ---       |
| 237262_at    | Full length insert cDNA clone ZE05E03                                       | --- | ---       |
| 240845_at    | Transcribed locus                                                           | --- | ---       |
| 230177_at    | Clone HLS_IMAGE_204740 mRNA sequence                                        | --- | ---       |
| 235772_at    | Transcribed locus                                                           | --- | ---       |
| 232555_at    | CDNA FLJ11431 fis, clone HEMBA1001094                                       | --- | ---       |
| 233130_at    | CDNA FLJ12202 fis, clone MAMMA1000908                                       | --- | ---       |
| 1556817_a_at | Full length insert cDNA clone ZB40C06                                       | --- | ---       |
| 239984_at    | ---                                                                         | --- | ---       |
| 240673_at    | Transcribed locus                                                           | --- | ---       |
| 1556332_at   | CDNA FLJ38412 fis, clone FEBRA2009385                                       | --- | ---       |
| 1557222_at   | MRNA; cDNA DKFZp686I23117 (from clone DKFZp686I23117)                       | --- | ---       |
| 244425_at    | ---                                                                         | --- | ---       |
| 236090_at    | Transcribed locus                                                           | --- | ---       |
| 236153_at    | Transcribed locus                                                           | --- | ---       |
| 230444_at    | Transcribed locus                                                           | --- | ---       |
| 239496_at    | Transcribed locus                                                           | --- | ---       |
| 237064_x_at  | Transcribed locus                                                           | --- | ---       |
| 233908_x_at  | CDNA FLJ12050 fis, clone HEMBB1002002                                       | --- | ---       |
| 225716_at    | Full-length cDNA clone CS0DK008YI09 of HeLa cells Cot 25-normalized of Homo | --- | ---       |
| 231627_at    | CDNA FLJ25810 fis, clone TST07303                                           | --- | ---       |
| 1570099_at   | Homo sapiens, clone IMAGE:5202535, mRNA                                     | --- | ---       |
| 233300_at    | CDNA FLJ11548 fis, clone HEMBA1002944                                       | --- | ---       |
| 242898_at    | ---                                                                         | --- | 5610      |
| 237803_x_at  | Transcribed locus                                                           | --- | ---       |
| 212993_at    | MRNA; cDNA DKFZp667B1718 (from clone DKFZp667B1718)                         | --- | 138151    |
| 232834_at    | CDNA FLJ11994 fis, clone HEMBB1001436                                       | --- | ---       |
| 240594_at    | Transcribed locus                                                           | --- | ---       |
| 242610_x_at  | Transcribed locus                                                           | --- | ---       |
| 238075_at    | Transcribed locus                                                           | --- | ---       |
| 215397_x_at  | CDNA FLJ12379 fis, clone MAMMA1002554                                       | --- | ---       |
| 228662_at    | CDNA FLJ37019 fis, clone BRACE2010669                                       | --- | 30837     |
| 215439_x_at  | CDNA FLJ11924 fis, clone HEMBB1000343                                       | --- | ---       |
| 227929_at    | CDNA clone IMAGE:5277945                                                    | --- | ---       |
| 213826_s_at  | ---                                                                         | --- | 100133109 |
| 1564547_x_at | Homo sapiens, clone IMAGE:3138608, mRNA                                     | --- | ---       |
| 239811_at    | ---                                                                         | --- | ---       |
| 235767_x_at  | Full length insert cDNA clone ZD82B02                                       | --- | ---       |
| 232338_at    | CDNA FLJ11553 fis, clone HEMBA1003034                                       | --- | ---       |
| 215450_at    | ---                                                                         | --- | ---       |
| 234827_at    | MRNA; cDNA DKFZp564M0463 (from clone DKFZp564M0463)                         | --- | ---       |
| 231087_at    | Transcribed locus                                                           | --- | ---       |
| 1565811_at   | CDNA clone IMAGE:5278245                                                    | --- | ---       |
| 233393_at    | CDNA FLJ12020 fis, clone HEMBB1001753                                       | --- | ---       |
| 243586_at    | Transcribed locus                                                           | --- | ---       |
| 237438_at    | Transcribed locus                                                           | --- | ---       |
| 1570566_at   | Transcribed locus                                                           | --- | ---       |
| 1561018_at   | Full length insert cDNA clone ZD44H09                                       | --- | ---       |
| 222145_at    | CDNA: FLJ23572 fis, clone LNG12403                                          | --- | ---       |
| 232527_at    | CDNA FLJ13309 fis, clone OVARC1001442                                       | --- | ---       |
| 226183_at    | MRNA; cDNA DKFZp686L15210 (from clone DKFZp686L15210)                       | --- | ---       |
| 233623_at    | Clone FLB3107                                                               | --- | ---       |
| 214807_at    | MRNA; cDNA DKFZp564O0862 (from clone DKFZp564O0862)                         | --- | ---       |



|              |                                                                                   |     |           |
|--------------|-----------------------------------------------------------------------------------|-----|-----------|
| 1558842_at   | ---                                                                               | --- | ---       |
| 226572_at    | CDNA FLJ37019 fis, clone BRACE2010669                                             | --- | 30837     |
| 241595_at    | ---                                                                               | --- | ---       |
| 242462_at    | CDNA clone IMAGE:5301514                                                          | --- | 100131741 |
| 241991_at    | Transcribed locus                                                                 | --- | ---       |
| 227754_at    | CDNA FLJ10417 fis, clone NT2RP1000112                                             | --- | ---       |
| 207596_at    | ---                                                                               | --- | 100130703 |
| 230175_s_at  | ---                                                                               | --- | ---       |
| 238787_at    | CDNA FLJ36663 fis, clone UTERU2002826                                             | --- | ---       |
| 235841_at    | Full-length cDNA clone CS0DM006YA12 of Fetal liver of Homo sapiens (human)        | --- | ---       |
| 242713_at    | Transcribed locus                                                                 | --- | ---       |
| 244061_at    | ---                                                                               | --- | ---       |
| 1570639_at   | Homo sapiens, clone IMAGE:4499612, mRNA                                           | --- | ---       |
| 235890_at    | Transcribed locus                                                                 | --- | ---       |
| 232726_at    | CDNA: FLJ21303 fis, clone COL02107                                                | --- | ---       |
| 241722_x_at  | Transcribed locus                                                                 | --- | ---       |
| 216621_at    | MRNA; cDNA DKFZp566F1224 (from clone DKFZp566F1224)                               | --- | ---       |
| 217536_x_at  | Transcribed locus                                                                 | --- | ---       |
| 1558237_x_at | ---                                                                               | --- | ---       |
| 1561058_at   | CDNA clone IMAGE:5278570                                                          | --- | ---       |
| 243606_at    | Transcribed locus                                                                 | --- | ---       |
| 236196_at    | CDNA FLJ42548 fis, clone BRACE3004996                                             | --- | ---       |
| 232535_at    | MRNA; cDNA DKFZp434L201 (from clone DKFZp434L201)                                 | --- | ---       |
| 215525_at    | ---                                                                               | --- | ---       |
| 214202_at    | MRNA from chromosome 5q21-22, clone:357Ex                                         | --- | ---       |
| 229021_at    | CDNA: FLJ23331 fis, clone HEP12664                                                | --- | ---       |
| 233037_at    | Clone FLB2932 mRNA sequence                                                       | --- | ---       |
| 244728_at    | CDNA clone IMAGE:7501601                                                          | --- | ---       |
| 241846_at    | CDNA FLJ46556 fis, clone THYMU3039807                                             | --- | ---       |
| 227579_at    | ---                                                                               | --- | ---       |
| 227432_s_at  | Transcribed locus, weakly similar to XP_512323.2 insulin receptor, partial [Pan 1 | --- | ---       |
| 243904_at    | CDNA clone IMAGE:5287121                                                          | --- | ---       |
| 241417_at    | Transcribed locus                                                                 | --- | ---       |
| 236980_at    | ELISC-1                                                                           | --- | ---       |
| 222330_at    | Transcribed locus                                                                 | --- | ---       |
| 238050_at    | Transcribed locus                                                                 | --- | ---       |
| 242108_at    | MRNA; cDNA DKFZp686F1782 (from clone DKFZp686F1782)                               | --- | ---       |
| 235848_x_at  | Transcribed locus                                                                 | --- | ---       |
| 230921_s_at  | Transcribed locus                                                                 | --- | ---       |
| 1566825_at   | CDNA FLJ31010 fis, clone HLUNG2000174                                             | --- | ---       |
| 242364_x_at  | CDNA clone IMAGE:5286005                                                          | --- | 100131096 |
| 242057_at    | Transcribed locus                                                                 | --- | ---       |
| 237952_at    | ---                                                                               | --- | ---       |
| 230091_at    | Transcribed locus                                                                 | --- | ---       |
| 1556658_a_at | CDNA FLJ36459 fis, clone THYMU2014762                                             | --- | ---       |
| 227252_at    | Transcribed locus                                                                 | --- | ---       |
| 205955_at    | ---                                                                               | --- | ---       |
| 235227_at    | CDNA clone IMAGE:5287121                                                          | --- | ---       |
| 207731_at    | ---                                                                               | --- | ---       |
| 233519_at    | Clone 23637 mRNA sequence                                                         | --- | ---       |
| 237798_at    | ---                                                                               | --- | ---       |
| 1562935_at   | CDNA clone IMAGE:5285945                                                          | --- | ---       |
| 226795_at    | Transcribed locus                                                                 | --- | ---       |
| 229705_at    | Transcribed locus                                                                 | --- | ---       |
| 240338_at    | Transcribed locus                                                                 | --- | ---       |
| 217643_x_at  | ---                                                                               | --- | ---       |
| 1562727_at   | Homo sapiens, clone IMAGE:4724389                                                 | --- | ---       |
| 213637_at    | Transcribed locus                                                                 | --- | ---       |
| 1560131_at   | CDNA clone IMAGE:5261865                                                          | --- | ---       |
| 242521_at    | Homo sapiens, Similar to neuronal thread protein, clone IMAGE:4106635, mRNA/      | --- | ---       |
| 230805_at    | Transcribed locus, strongly similar to XP_001101257.1 similar to sterol regulato  | --- | ---       |
| 215597_x_at  | CDNA FLJ11353 fis, clone HEMBA1000042                                             | --- | ---       |
| 1569540_at   | ---                                                                               | --- | ---       |

|              |                                                                                  |     |        |
|--------------|----------------------------------------------------------------------------------|-----|--------|
| 1561870_at   | CDNA clone IMAGE:5287035                                                         | --- | ---    |
| 239759_at    | Transcribed locus                                                                | --- | ---    |
| 1562324_a_at | MRNA; cDNA DKFZp313M0331 (from clone DKFZp313M0331)                              | --- | ---    |
| 232297_at    | CDNA FLJ11313 fis, clone PLACE1010106, highly similar to Homo sapiens mRNA,      | --- | ---    |
| 1566144_at   | CDNA FLJ41018 fis, clone UTERU2018881                                            | --- | ---    |
| 233081_at    | CDNA FLJ12305 fis, clone MAMMA1001890                                            | --- | ---    |
| 244242_at    | Transcribed locus                                                                | --- | ---    |
| 1555374_at   | ---                                                                              | --- | ---    |
| 236821_at    | Transcribed locus                                                                | --- | ---    |
| 1554597_at   | MRNA; cDNA DKFZp547K189 (from clone DKFZp547K189)                                | --- | ---    |
| 216756_at    | CDNA: FLJ21342 fis, clone COL02673                                               | --- | ---    |
| 1556818_at   | Full length insert cDNA clone YB35F05                                            | --- | ---    |
| 217586_x_at  | ---                                                                              | --- | ---    |
| 243431_at    | Transcribed locus                                                                | --- | ---    |
| 239571_at    | Transcribed locus                                                                | --- | ---    |
| 236346_at    | Transcribed locus                                                                | --- | ---    |
| 1559410_at   | Transcribed locus                                                                | --- | ---    |
| 1559132_at   | ---                                                                              | --- | 283232 |
| 235423_at    | Transcribed locus, moderately similar to XP_517655.1 similar to KIAA0825 prot    | --- | ---    |
| 1556242_a_at | Full-length cDNA clone CSODI008YN13 of Placenta Cot 25-normalized of Homo s      | --- | ---    |
| 216069_at    | CDNA FLJ31388 fis, clone NT2NE1000023                                            | --- | ---    |
| 243748_at    | ---                                                                              | --- | ---    |
| 1569052_at   | CDNA clone IMAGE:3840062                                                         | --- | ---    |
| 236975_at    | Transcribed locus                                                                | --- | ---    |
| 243388_at    | Transcribed locus, strongly similar to XP_519898.1 similar to DKFZP564O0463 p    | --- | ---    |
| 1557667_at   | CDNA FLJ36588 fis, clone TRACH2013991                                            | --- | ---    |
| 1555904_at   | Homo sapiens, clone IMAGE:4779853, mRNA                                          | --- | ---    |
| 232958_at    | CDNA FLJ13595 fis, clone PLACE1009595                                            | --- | ---    |
| 242818_x_at  | Transcribed locus                                                                | --- | ---    |
| 238666_at    | Transcribed locus                                                                | --- | ---    |
| 240319_at    | Transcribed locus, strongly similar to XP_001105818.1 caspase recruitment don    | --- | ---    |
| 214949_at    | CDNA FLJ31919 fis, clone NT2RP7004964                                            | --- | ---    |
| 237588_at    | ---                                                                              | --- | ---    |
| 243147_x_at  | Transcribed locus                                                                | --- | ---    |
| 229606_at    | Transcribed locus, strongly similar to XP_517366.1 similar to Serine/threonine f | --- | ---    |
| 221963_x_at  | Transcribed locus                                                                | --- | ---    |
| 244663_at    | Transcribed locus                                                                | --- | ---    |
| 239050_s_at  | CDNA FLJ13202 fis, clone NT2RP3004503                                            | --- | ---    |
| 220905_at    | ---                                                                              | --- | ---    |
| 212812_at    | CDNA: FLJ22642 fis, clone HSI06970                                               | --- | ---    |
| 1561909_at   | ---                                                                              | --- | ---    |
| 241688_at    | Transcribed locus                                                                | --- | ---    |
| 217679_x_at  | ---                                                                              | --- | ---    |
| 241093_at    | Transcribed locus                                                                | --- | ---    |
| 236540_at    | Transcribed locus                                                                | --- | ---    |
| 244592_at    | ---                                                                              | --- | ---    |
| 239364_at    | ---                                                                              | --- | ---    |
| 236703_at    | Transcribed locus                                                                | --- | ---    |
| 243186_at    | ---                                                                              | --- | ---    |
| 1569604_at   | Homo sapiens, clone IMAGE:4401848, mRNA                                          | --- | ---    |
| 239179_at    | ---                                                                              | --- | ---    |
| 242113_at    | Transcribed locus                                                                | --- | ---    |
| 233007_at    | CDNA FLJ12100 fis, clone HEMBB1002677                                            | --- | ---    |
| 244259_s_at  | CDNA FLJ11179 fis, clone PLACE1007450                                            | --- | ---    |
| 239085_at    | Transcribed locus                                                                | --- | ---    |
| 229798_s_at  | ---                                                                              | --- | ---    |
| 232876_at    | CDNA: FLJ21881 fis, clone HEP02746                                               | --- | ---    |
| 1568915_at   | CDNA clone IMAGE:4822684                                                         | --- | ---    |
| 234958_at    | Clone HQ0352 PRO0352                                                             | --- | ---    |
| 217540_at    | Transcribed locus                                                                | --- | ---    |
| 226191_at    | MRNA; cDNA DKFZp686L15210 (from clone DKFZp686L15210)                            | --- | ---    |
| 239311_at    | Transcribed locus                                                                | --- | ---    |
| 243030_at    | Transcribed locus                                                                | --- | ---    |

|              |                                                                            |     |           |
|--------------|----------------------------------------------------------------------------|-----|-----------|
| 228861_at    | CDNA FLJ26683 fis, clone MPG05945                                          | --- | ---       |
| 1559522_at   | CDNA FLJ40173 fis, clone TESTI2016922                                      | --- | ---       |
| 229970_at    | ---                                                                        | --- | 84078     |
| 1562836_at   | CDNA FLJ11653 fis, clone HEMBA1004538                                      | --- | ---       |
| 239358_at    | Transcribed locus                                                          | --- | ---       |
| 1558430_at   | CDNA FLJ36648 fis, clone UTERU1000138                                      | --- | ---       |
| 226910_at    | CDNA FLJ30661 fis, clone DFNES2000526                                      | --- | ---       |
| 242117_at    | Transcribed locus                                                          | --- | ---       |
| 1562009_a_at | CDNA FLJ40764 fis, clone TRACH2002954                                      | --- | ---       |
| 235660_at    | MRNA; cDNA DKFZp667E0114 (from clone DKFZp667E0114)                        | --- | ---       |
| 229968_at    | Transcribed locus                                                          | --- | ---       |
| 233068_at    | CDNA FLJ13202 fis, clone NT2RP3004503                                      | --- | ---       |
| 231968_at    | CDNA: FLJ21763 fis, clone COLF6967                                         | --- | ---       |
| 1554599_x_at | MRNA; cDNA DKFZp547K189 (from clone DKFZp547K189)                          | --- | ---       |
| 239049_at    | CDNA FLJ13202 fis, clone NT2RP3004503                                      | --- | ---       |
| 226821_at    | Full-length cDNA clone CS0DF029YD16 of Fetal brain of Homo sapiens (human) | --- | ---       |
| 216499_at    | MRNA; cDNA DKFZp434K0610 (from clone DKFZp434K0610)                        | --- | ---       |
| 240498_at    | ---                                                                        | --- | ---       |
| 1569974_x_at | Homo sapiens, clone IMAGE:4849828, mRNA                                    | --- | 641977    |
| 231259_s_at  | Transcribed locus                                                          | --- | ---       |
| 234032_at    | PRO1550                                                                    | --- | ---       |
| 229987_at    | Transcribed locus                                                          | --- | ---       |
| 236002_at    | CDNA FLJ27180 fis, clone SYN02180                                          | --- | ---       |
| 233105_at    | CDNA: FLJ22627 fis, clone HSI06152                                         | --- | ---       |
| 239284_at    | ---                                                                        | --- | ---       |
| 242167_at    | ---                                                                        | --- | ---       |
| 235846_at    | CDNA FLJ23692 fis, clone HEP10227                                          | --- | ---       |
| 241940_at    | Transcribed locus                                                          | --- | ---       |
| 235415_at    | ---                                                                        | --- | 23248     |
| 1558938_at   | Homo sapiens, clone IMAGE:5222953, mRNA                                    | --- | ---       |
| 241091_at    | Transcribed locus                                                          | --- | ---       |
| 1568748_at   | Homo sapiens, clone IMAGE:5193340, mRNA                                    | --- | ---       |
| 208246_x_at  | CDNA FLJ20006 fis, clone ADKA02694                                         | --- | ---       |
| 228579_at    | CDNA FLJ37386 fis, clone BRAMY2026538                                      | --- | ---       |
| 242144_at    | ---                                                                        | --- | ---       |
| 1569409_x_at | CDNA clone IMAGE:4798202                                                   | --- | ---       |
| 233228_at    | CDNA: FLJ21229 fis, clone COL00740                                         | --- | ---       |
| 228001_at    | CDNA FLJ26146 fis, clone ADG00290                                          | --- | 757       |
| 232781_at    | CDNA: FLJ22769 fis, clone KAIA1316                                         | --- | ---       |
| 227576_at    | CDNA FLJ42015 fis, clone SPLEN2032813                                      | --- | ---       |
| 233824_at    | CDNA: FLJ21428 fis, clone COL04203                                         | --- | ---       |
| 1569181_x_at | Homo sapiens, clone IMAGE:4250282, mRNA                                    | --- | ---       |
| 243663_at    | Transcribed locus                                                          | --- | ---       |
| 238172_at    | Transcribed locus                                                          | --- | ---       |
| 1569180_at   | Homo sapiens, clone IMAGE:4250282, mRNA                                    | --- | ---       |
| 235803_at    | Transcribed locus                                                          | --- | ---       |
| 1562314_at   | MRNA; cDNA DKFZp761C1622 (from clone DKFZp761C1622)                        | --- | ---       |
| 229114_at    | CDNA clone IMAGE:4801326                                                   | --- | 2549      |
| 242885_at    | ---                                                                        | --- | ---       |
| 1565975_at   | CDNA FLJ23646 fis, clone COL03258                                          | --- | ---       |
| 1555311_at   | ---                                                                        | --- | ---       |
| 228944_at    | Transcribed locus                                                          | --- | ---       |
| 235788_at    | Transcribed locus                                                          | --- | ---       |
| 239469_at    | Transcribed locus                                                          | --- | ---       |
| 1555853_at   | ---                                                                        | --- | ---       |
| 229575_at    | Transcribed locus                                                          | --- | ---       |
| 226527_at    | ---                                                                        | --- | 23248     |
| 242449_at    | Transcribed locus                                                          | --- | ---       |
| 236237_at    | Transcribed locus                                                          | --- | ---       |
| 1556043_a_at | CDNA clone IMAGE:5272988                                                   | --- | 100131039 |
| 231272_at    | Transcribed locus                                                          | --- | ---       |
| 238714_at    | Transcribed locus                                                          | --- | ---       |
| 228983_at    | Transcribed locus                                                          | --- | ---       |

|              |                                                                                |     |            |
|--------------|--------------------------------------------------------------------------------|-----|------------|
| 241838_at    | Transcribed locus                                                              | --- | ---        |
| 224148_at    | ---                                                                            | --- | 2533       |
| 1555845_at   | CDNA FLJ39218 fis, clone OCBBF2006660                                          | --- | ---        |
| 228932_at    | Transcribed locus                                                              | --- | ---        |
| 232710_at    | CDNA FLJ11415 fis, clone HEMBA1000942                                          | --- | ---        |
| 1556221_a_at | CDNA FLJ35137 fis, clone PLACE6009419                                          | --- | ---        |
| 210679_x_at  | ---                                                                            | --- | ---        |
| 217579_x_at  | Transcribed locus                                                              | --- | ---        |
| 241268_x_at  | ---                                                                            | --- | ---        |
| 240154_at    | Transcribed locus                                                              | --- | ---        |
| 238261_at    | Transcribed locus                                                              | --- | ---        |
| 228254_at    | Transcribed locus                                                              | --- | 10254      |
| 222294_s_at  | CDNA clone IMAGE:5745639                                                       | --- | ---        |
| 228753_at    | Transcribed locus, moderately similar to XP_001148836.1 hypothetical protein   | --- | 100128737  |
| 230292_at    | CDNA FLJ25310 fis, clone SYN00991                                              | --- | 100131993  |
| 234084_x_at  | CDNA FLJ12075 fis, clone HEMBB1002425                                          | --- | ---        |
| 228974_at    | CDNA FLJ42233 fis, clone THYMU3000420                                          | --- | ---        |
| 235437_at    | Transcribed locus                                                              | --- | ---        |
| 242676_at    | Transcribed locus                                                              | --- | ---        |
| 230632_at    | Full-length cDNA clone CS0DI051YA02 of Placenta Cot 25-normalized of Homo s    | --- | ---        |
| 242073_at    | Transcribed locus                                                              | --- | ---        |
| 237255_at    | ---                                                                            | --- | ---        |
| 210183_x_at  | ---                                                                            | --- | 5411       |
| 1559467_at   | CDNA FLJ36734 fis, clone UTERU2012890                                          | --- | ---        |
| 240481_at    | Transcribed locus                                                              | --- | ---        |
| 217591_at    | Transcribed locus                                                              | --- | ---        |
| 235662_at    | Transcribed locus                                                              | --- | ---        |
| 240574_at    | CDNA clone IMAGE:5262677                                                       | --- | ---        |
| 228910_at    | Transcribed locus                                                              | --- | ---        |
| 238796_at    | Transcribed locus, weakly similar to XP_001098270.1 similar to YTH domain-co   | --- | ---        |
| 224601_at    | CDNA clone IMAGE:3831740                                                       | --- | ---        |
| 1558959_at   | CDNA FLJ37917 fis, clone CTONG1000137                                          | --- | ---        |
| 239486_at    | Transcribed locus                                                              | --- | ---        |
| 243754_at    | Transcribed locus                                                              | --- | ---        |
| 1559391_s_at | Partial mRNA; ID EE2-8E                                                        | --- | ---        |
| 230944_at    | Transcribed locus                                                              | --- | ---        |
| 231078_at    | Transcribed locus, strongly similar to XP_001106001.1 similar to mitochondrial | --- | ---        |
| 236435_at    | ---                                                                            | --- | ---        |
| 239152_at    | Transcribed locus                                                              | --- | ---        |
| 236571_at    | Transcribed locus                                                              | --- | ---        |
| 217209_at    | ---                                                                            | --- | 1084       |
| 1569955_at   | Homo sapiens, clone IMAGE:4097490, mRNA                                        | --- | ---        |
| 240064_at    | Transcribed locus, strongly similar to XP_529518.1 hypothetical protein XP_529 | --- | ---        |
| 226186_at    | CDNA clone IMAGE:5301189                                                       | --- | ---        |
| 229066_at    | Transcribed locus                                                              | --- | ---        |
| 221861_at    | MRNA; cDNA DKFZp762M127 (from clone DKFZp762M127)                              | --- | ---        |
| 240630_at    | Transcribed locus                                                              | --- | ---        |
| 230918_at    | Transcribed locus                                                              | --- | ---        |
| 234047_at    | CDNA FLJ14065 fis, clone HEMBB1000917                                          | --- | ---        |
| 233331_at    | Unknown mRNA sequence                                                          | --- | ---        |
| 1555993_at   | Full length insert cDNA clone YY51E04                                          | --- | 776        |
| 1557521_a_at | CDNA clone IMAGE:5311184                                                       | --- | ---        |
| 1570192_at   | Homo sapiens, clone IMAGE:4480721, mRNA                                        | --- | ---        |
| 1555187_at   | ---                                                                            | --- | ---        |
| 236484_at    | Transcribed locus                                                              | --- | ---        |
| 1562244_at   | MRNA; cDNA DKFZp686H1629 (from clone DKFZp686H1629)                            | --- | 147660     |
| 242959_at    | ---                                                                            | --- | ---        |
| 233059_at    | CDNA: FLJ22731 fis, clone HSI15841                                             | --- | ---        |
| 240496_at    | Transcribed locus                                                              | --- | ---        |
| 222280_at    | Homo sapiens, clone IMAGE:3830652, mRNA                                        | --- | ---        |
| 227277_at    | CDNA FLJ41088 fis, clone ASTRO2002459                                          | --- | ---        |
| 223791_at    | CDNA clone IMAGE:6018774                                                       | --- | 100132948, |
| 228156_at    | Homo sapiens, clone IMAGE:4346533, mRNA                                        | --- | ---        |

|              |                                                                                |     |           |
|--------------|--------------------------------------------------------------------------------|-----|-----------|
| 242275_at    | Transcribed locus                                                              | --- | ---       |
| 233450_at    | CDNA FLJ33986 fis, clone DFNES2005779                                          | --- | ---       |
| 217653_x_at  | ---                                                                            | --- | ---       |
| 229558_at    | Transcribed locus                                                              | --- | ---       |
| 239070_at    | Full-length cDNA clone CS0CAP004YK07 of Thymus of Homo sapiens (human)         | --- | ---       |
| 240253_at    | Transcribed locus                                                              | --- | ---       |
| 1560646_at   | ---                                                                            | --- | 121952    |
| 228175_at    | CDNA FLJ31660 fis, clone NT2RI2004410                                          | --- | ---       |
| 1558819_at   | Homo sapiens, clone IMAGE:5245578, mRNA                                        | --- | 100131819 |
| 232670_at    | CDNA FLJ11735 fis, clone HEMBA1005447                                          | --- | ---       |
| 1560865_a_at | Full length insert cDNA clone YO02C07                                          | --- | ---       |
| 237372_at    | Transcribed locus                                                              | --- | ---       |
| 1557295_a_at | CDNA FLJ25198 fis, clone REC04733                                              | --- | ---       |
| 1566658_at   | CDNA clone IMAGE:4825100                                                       | --- | ---       |
| 244535_at    | Transcribed locus                                                              | --- | ---       |
| 220787_at    | ---                                                                            | --- | ---       |
| 231013_at    | ---                                                                            | --- | ---       |
| 1559515_at   | CDNA FLJ33748 fis, clone BRCAN2000148                                          | --- | ---       |
| 241175_at    | Transcribed locus                                                              | --- | ---       |
| 243399_at    | Transcribed locus, strongly similar to XP_515434.1 hypothetical protein XP_515 | --- | ---       |
| 231098_at    | Transcribed locus                                                              | --- | ---       |
| 1559426_at   | CDNA FLJ39210 fis, clone OCBBF2006154                                          | --- | ---       |
| 241634_at    | Transcribed locus, strongly similar to XP_530590.1 hypothetical protein XP_530 | --- | 100132345 |
| 202969_at    | MRNA; cDNA DKFZp667B0924 (from clone DKFZp667B0924)                            | --- | 8445      |
| 215594_at    | PTR2 mRNA for repetitive sequence                                              | --- | ---       |
| 215456_at    | Clone 24734 mRNA sequence                                                      | --- | ---       |
| 244845_at    | Transcribed locus                                                              | --- | ---       |
| 215571_at    | CDNA FLJ11433 fis, clone HEMBA1001121                                          | --- | ---       |
| 237580_at    | Transcribed locus, weakly similar to NP_997317.1 protein LOC400002 [Homo sa    | --- | ---       |
| 234522_at    | CDNA: FLJ21335 fis, clone COL02546                                             | --- | ---       |
| 1560141_at   | CDNA FLJ25312 fis, clone SYN01070                                              | --- | 100133039 |
| 219731_at    | ---                                                                            | --- | ---       |
| 239063_at    | CDNA FLJ39803 fis, clone SPLEN2007794                                          | --- | ---       |
| 234502_at    | MRNA; cDNA DKFZp564D043 (from clone DKFZp564D043)                              | --- | ---       |
| 1561683_at   | CDNA clone IMAGE:5270641                                                       | --- | ---       |
| 237134_at    | Transcribed locus                                                              | --- | ---       |
| 222072_at    | ---                                                                            | --- | 7511      |
| 233484_at    | Clone 25015 mRNA sequence                                                      | --- | ---       |
| 228679_at    | CDNA FLJ30856 fis, clone FEBRA2003258                                          | --- | ---       |
| 231924_at    | Full-length cDNA clone CS0DE011YB11 of Placenta of Homo sapiens (human)        | --- | ---       |
| 1560257_at   | CDNA clone IMAGE:5298774                                                       | --- | ---       |
| 207478_at    | ---                                                                            | --- | 100128329 |
| 229384_at    | CDNA FLJ42101 fis, clone TESOP2006704                                          | --- | ---       |
| 243470_at    | ---                                                                            | --- | ---       |
| 1561149_at   | Full length insert cDNA clone ZD75C06                                          | --- | ---       |
| 239450_at    | Transcribed locus                                                              | --- | ---       |
| 224270_at    | Ovarian cancer-related protein 1 (OCR1)                                        | --- | 100128298 |
| 206188_at    | ---                                                                            | --- | 9831      |
| 244072_at    | ---                                                                            | --- | ---       |
| 243706_at    | Transcribed locus                                                              | --- | ---       |
| 240685_at    | CDNA clone IMAGE:4829423                                                       | --- | ---       |
| 1564012_at   | CDNA FLJ38229 fis, clone FCBBF2004256                                          | --- | ---       |
| 225725_at    | CDNA clone IMAGE:5261213                                                       | --- | ---       |
| 227995_at    | MRNA; cDNA DKFZp564O0862 (from clone DKFZp564O0862)                            | --- | ---       |
| 229635_at    | CDNA clone IMAGE:4800262                                                       | --- | ---       |
| 240432_x_at  | Transcribed locus                                                              | --- | ---       |
| 241652_x_at  | Transcribed locus                                                              | --- | ---       |
| 242633_x_at  | ---                                                                            | --- | 100128510 |
| 241321_at    | Transcribed locus                                                              | --- | ---       |
| 231406_at    | MRNA; cDNA DKFZp667G1412 (from clone DKFZp667G1412)                            | --- | 80228     |
| 236065_at    | Transcribed locus                                                              | --- | ---       |
| 238455_at    | CDNA FLJ45742 fis, clone KIDNE2016327                                          | --- | ---       |
| 225256_at    | CDNA FLJ41369 fis, clone BRCAN2006117                                          | --- | ---       |

|              |                                                                                 |     |           |
|--------------|---------------------------------------------------------------------------------|-----|-----------|
| 228700_at    | CDNA FLJ11567 fis, clone HEMBA1003276                                           | --- | ---       |
| 229373_at    | Transcribed locus                                                               | --- | ---       |
| 235882_at    | CDNA clone IMAGE:5303499                                                        | --- | 55275     |
| 213573_at    | Full-length cDNA clone CS0DH006YD11 of T cells (Jurkat cell line) of Homo sapie | --- | ---       |
| 229952_at    | Transcribed locus, weakly similar to XP_001114804.1 spectrin, beta, non-erythr  | --- | ---       |
| 226532_at    | Full-length cDNA clone CS0DD009YD14 of Neuroblastoma Cot 50-normalized of       | --- | ---       |
| 229298_at    | ---                                                                             | --- | 84078     |
| 226002_at    | CDNA clone IMAGE:4801326                                                        | --- | 2549      |
| 225356_at    | Transcribed locus                                                               | --- | ---       |
| 242714_at    | ---                                                                             | --- | ---       |
| 222366_at    | Transcribed locus                                                               | --- | ---       |
| 1557810_at   | Clone HEA5 Cri-du-chat critical region mRNA                                     | --- | ---       |
| 230860_at    | Transcribed locus                                                               | --- | 84984     |
| 238170_at    | Transcribed locus                                                               | --- | ---       |
| 229111_at    | Transcribed locus                                                               | --- | ---       |
| 239021_at    | Transcribed locus, moderately similar to XP_530714.1 hypothetical protein XP_   | --- | ---       |
| 228775_at    | ---                                                                             | --- | ---       |
| 235207_at    | Transcribed locus                                                               | --- | ---       |
| 238507_at    | Transcribed locus                                                               | --- | ---       |
| 230411_at    | CDNA FLJ41934 fis, clone PERIC2005111                                           | --- | ---       |
| 233940_at    | CDNA FLJ12739 fis, clone NT2RP2000498                                           | --- | ---       |
| 1557543_at   | MRNA; cDNA DKFZp313P2412 (from clone DKFZp313P2412)                             | --- | ---       |
| 1566964_at   | ---                                                                             | --- | ---       |
| 228415_at    | ---                                                                             | --- | 8905      |
| 240038_at    | Transcribed locus                                                               | --- | ---       |
| 226742_at    | Transcribed locus                                                               | --- | ---       |
| 233935_at    | CDNA: FLJ23051 fis, clone LNG02642                                              | --- | ---       |
| 230585_at    | Transcribed locus                                                               | --- | ---       |
| 239876_at    | Transcribed locus                                                               | --- | ---       |
| 242558_at    | CDNA FLJ45490 fis, clone BRTHA2005831                                           | --- | ---       |
| 239329_at    | Transcribed locus, weakly similar to NP_001080148.1 factor, arginine/serine-ric | --- | ---       |
| 217152_at    | CDNA FLJ14074 fis, clone HEMBB1001869                                           | --- | ---       |
| 238769_at    | Transcribed locus                                                               | --- | ---       |
| 243511_at    | Transcribed locus                                                               | --- | ---       |
| 239129_at    | ---                                                                             | --- | ---       |
| 244550_at    | ---                                                                             | --- | ---       |
| 235592_at    | CDNA FLJ36210 fis, clone THYMU2000155                                           | --- | ---       |
| 231963_at    | Homo sapiens, clone IMAGE:3869276, mRNA                                         | --- | ---       |
| 240238_at    | ---                                                                             | --- | ---       |
| 1564568_at   | MRNA; cDNA DKFZp586D2022 (from clone DKFZp586D2022)                             | --- | 9244      |
| 244022_at    | ---                                                                             | --- | ---       |
| 236462_at    | Transcribed locus                                                               | --- | ---       |
| 230139_at    | CDNA FLJ43345 fis, clone NT2RI3008228                                           | --- | ---       |
| 1566633_at   | CDNA clone IMAGE:3950788                                                        | --- | ---       |
| 239448_at    | Transcribed locus                                                               | --- | ---       |
| 230526_at    | CDNA clone IMAGE:5286005                                                        | --- | 100131096 |
| 229624_at    | Transcribed locus                                                               | --- | 80207     |
| 239464_at    | ---                                                                             | --- | ---       |
| 226498_at    | CDNA FLJ35153 fis, clone PLACE6010765                                           | --- | ---       |
| 238467_at    | CDNA FLJ41419 fis, clone BRHIP2002339                                           | --- | ---       |
| 1563629_a_at | CDNA FLJ34475 fis, clone HLUNG2003716, moderately similar to RETROVIRUS-R       | --- | ---       |
| 1559116_s_at | CDNA clone IMAGE:3958310                                                        | --- | ---       |
| 243537_at    | ---                                                                             | --- | ---       |
| 242155_x_at  | Transcribed locus                                                               | --- | ---       |
| 228471_at    | CDNA FLJ11570 fis, clone HEMBA1003309                                           | --- | ---       |
| 236379_at    | ---                                                                             | --- | ---       |
| 232412_at    | CDNA: FLJ21037 fis, clone CAE10055                                              | --- | ---       |
| 1569551_at   | Homo sapiens, clone IMAGE:4454258, mRNA                                         | --- | ---       |
| 214405_at    | Clone 23705 mRNA sequence                                                       | --- | ---       |
| 226641_at    | CDNA FLJ11570 fis, clone HEMBA1003309                                           | --- | ---       |
| 241860_at    | CDNA FLJ40724 fis, clone THYMU2028724                                           | --- | ---       |
| 235695_at    | CDNA FLJ34214 fis, clone FCBBF3021807                                           | --- | ---       |
| 229213_at    | Transcribed locus                                                               | --- | 84925     |

|             |                                                                            |     |       |
|-------------|----------------------------------------------------------------------------|-----|-------|
| 224989_at   | Full-length cDNA clone CS0DE011YO20 of Placenta of Homo sapiens (human)    | --- | ---   |
| 226797_at   | MRNA; cDNA DKFZp434G0972 (from clone DKFZp434G0972)                        | --- | 54799 |
| 226810_at   | MRNA full length insert cDNA clone EUROIMAGE 1509279                       | --- | 79627 |
| 1563509_at  | MRNA; cDNA DKFZp313O229 (from clone DKFZp313O229)                          | --- | ---   |
| 228963_at   | Transcribed locus, moderately similar to NP_076428.2 protein LOC65996 [Hom | --- | ---   |
| 234644_x_at | CDNA: FLJ22426 fis, clone HRC08780                                         | --- | ---   |
| 237119_at   | Transcribed locus                                                          | --- | ---   |
| 230499_at   | Transcribed locus                                                          | --- | ---   |
| 244202_at   | Transcribed locus                                                          | --- | ---   |
| 240231_at   | Transcribed locus                                                          | --- | ---   |
| 226201_at   | MRNA; cDNA DKFZp586P1823 (from clone DKFZp586P1823)                        | --- | 84444 |
| 220882_at   | ---                                                                        | --- | ---   |
| 233700_at   | CDNA: FLJ21638 fis, clone COL08269                                         | --- | ---   |
| 240547_at   | Transcribed locus                                                          | --- | ---   |
| 238064_at   | Transcribed locus                                                          | --- | ---   |
| 240190_at   | Transcribed locus                                                          | --- | ---   |
| 233127_at   | CDNA FLJ12412 fis, clone MAMMA1003004                                      | --- | ---   |

***tularensis* LVS**

|                     | 3 hr     |         |          | 6 hr               |          |         | 12 hr    |                    |          |         |
|---------------------|----------|---------|----------|--------------------|----------|---------|----------|--------------------|----------|---------|
| ANOVA (0.000229538) | Avg ctrl | Avg LVS | LVS/ctrl | ANOVA (0.00258893) | Avg ctrl | Avg LVS | LVS/ctrl | ANOVA (0.00438409) | Avg ctrl | Avg LVS |
|                     |          |         |          |                    |          |         |          | 6.35822E-07        | 9407.3   | 2886.8  |
|                     |          |         |          |                    |          |         |          | 6.57398E-06        | 4014.45  | 1265.15 |
|                     |          |         |          |                    |          |         |          | 0.000121778        | 1222.4   | 571.7   |
|                     |          |         |          |                    |          |         |          | 2.11712E-07        | 1495.2   | 579.175 |
|                     |          |         |          |                    |          |         |          | 3.15513E-06        | 1050.67  | 247.8   |
|                     |          |         |          | 2.36579E-05        | 3328.03  | 1552.15 | -2.14414 | 1.62228E-07        | 3941.6   | 1359.08 |
|                     |          |         |          | 0.000171899        | 918.8    | 450.425 | -2.03985 | 1.89175E-05        | 1160.08  | 486.3   |
|                     |          |         |          | 4.54833E-08        | 2715.15  | 6363.3  | 2.34363  |                    |          |         |
|                     |          |         |          |                    |          |         |          | 0.000139037        | 2361     | 1131.78 |
|                     |          |         |          | 0.000030666        | 28571.4  | 12509.6 | -2.28395 | 7.97689E-06        | 34119.9  | 14984.8 |
|                     |          |         |          |                    |          |         |          | 2.25975E-06        | 28747.7  | 12606.6 |
|                     |          |         |          | 2.96221E-05        | 13884.1  | 4542.5  | -3.05648 | 4.0264E-06         | 16536.7  | 5679.5  |
|                     |          |         |          | 3.45347E-05        | 11993    | 4086.05 | -2.9351  | 4.44827E-05        | 13923.5  | 5250.33 |
|                     |          |         |          |                    |          |         |          | 4.49039E-08        | 2752.33  | 813.65  |
|                     |          |         |          | 0.00159019         | 2072.2   | 1020.85 | -2.02988 |                    |          |         |
|                     |          |         |          | 2.40717E-06        | 1401.9   | 690.85  | -2.02924 |                    |          |         |
|                     |          |         |          |                    |          |         |          | 6.58928E-05        | 1047.8   | 2510.88 |
|                     |          |         |          |                    |          |         |          | 0.000514963        | 966.25   | 2104.23 |



9.80886E-07 202.167 1812.15 8.96364 1.58472E-06 150.3 871.75

0.000155761 3692.8 1426.55

2.57868E-05 604.025 1718.38

8.33148E-06 2230.75 #DIV/0!

0.000117476 2350.85 1170.6 -2.00824 5.70229E-05 2032.18 896.875

1.60295E-06 697.8 246.875

1.65649E-05 8739.35 3841.45

5.50389E-05 1455.85 613.125 -2.37448

9.78805E-06 2547.98 6843.3

3747

0.000122173 670.525 331.067

2.74876E-05 5296.48 13514.8

6.58526E-07 1083.73 3483.63

4.99792E-05 301.35 777.075

9.17642E-08 1617.38 12257.575 7.57868

6.47543E-12 1215.03 33348.88 27.4471

6.91818E-14 890.3 46813.2

7.04433E-07 3637.35 1693.45 -2.14789

2.14372E-09 6406.05 1743.33

1.89888E-12 6313.98 1695.55

|             |             |         |          |             |             |          |         |
|-------------|-------------|---------|----------|-------------|-------------|----------|---------|
|             |             |         |          | 0.000610453 | 3840.53     | 1714.23  |         |
|             | 0.00161668  | 45458.4 | 95912.58 | 2.1099      | 5.04632E-07 | 20851.2  | 76040.4 |
|             |             |         |          |             | 5.61738E-07 | 2211.25  | 1090.5  |
|             | 2.61526E-08 | 11268.9 | 37312.08 | 3.31107     | 4.40931E-11 | 3850.6   | 21664.3 |
|             |             |         |          |             | 1.77224E-05 | 3228.38  | 1026.43 |
| 3.33446E-10 | 1507.63     | 3372.7  | 2.23709  | 7.12073E-10 | 2015.9      | 4425.575 | 2.19533 |
|             |             |         |          |             | 4.9509E-09  | 2151.38  | 4731.73 |

|  |  |  |  |            |         |         |
|--|--|--|--|------------|---------|---------|
|  |  |  |  | 0.00204183 | 18474.1 | 8019.93 |
|--|--|--|--|------------|---------|---------|

|  |  |  |  |             |         |         |
|--|--|--|--|-------------|---------|---------|
|  |  |  |  | 6.50432E-05 | 2632.95 | 1167.43 |
|  |  |  |  | 7.56701E-06 | 2142.58 | 876.3   |

|  |             |         |          |         |             |         |         |
|--|-------------|---------|----------|---------|-------------|---------|---------|
|  | 5.35694E-11 | 3341.03 | 21455.78 | 6.42191 | 1.12576E-14 | 1182.38 | 17269.3 |
|--|-------------|---------|----------|---------|-------------|---------|---------|

7491

|  |  |  |  |             |         |         |
|--|--|--|--|-------------|---------|---------|
|  |  |  |  | 1.10641E-07 | 4884.58 | 12294.9 |
|  |  |  |  | 1.65947E-08 | 3514.73 | 10720.7 |

519  
519  
519

|  |             |         |          |         |             |         |         |
|--|-------------|---------|----------|---------|-------------|---------|---------|
|  | 6.91821E-06 | #DIV/0! | 2290.975 | #DIV/0! | 0.000213601 | 705.925 | 297.425 |
|  | 1.92335E-05 | 347.8   | 1046.05  | 3.00762 | 2.89307E-07 | #DIV/0! | 3205.93 |
|  | 1.71606E-05 | 300.525 | 1151.725 | 3.83238 | 8.94912E-09 | #DIV/0! | 1445.28 |
|  | 4.38898E-05 | 1436.7  | 2953.925 | 2.05605 | 3.77355E-06 | 1531.73 | 3855.63 |

0.00161997 880.3 #DIV/0! #DIV/0!

0.00189776 2795.2 5644.33  
1.84024E-05 3376.18 1372.18

0.000139975 1663.75 589.35

3.47409E-06 573.375 146.95  
0.000318256 756.067 #DIV/0!

3.89971E-05 4606.98 15936.65 3.45924 9.15027E-05 4777.3 15757.8  
0.000253975 40765.1 88376.08 2.16794 0.000504089 38934.3 79563.3  
0.000605982 39736.3 83032.1 2.08958 0.00114395 37580.5 75489.4  
2.4661E-08 781.733 9447.225 12.085 1.15448E-11 787.9 25192

1.05341E-09 5297.35 11885.18 2.24361  
4.47959E-06 1850.83 4138.7 2.23614

0.000179685 335.325 730.075  
2.13095E-05 595.1 #DIV/0!

23600

1.86699E-05 13019.7 5771.075 -2.25603 8.90088E-07 17194.4 6441.8  
1.42908E-06 15315.9 7024.675 -2.1803 1.72268E-06 20673 9717.58  
0.000321909 703.967 1516.25 2.15387 0.00029403 1338.45 3098.9

0.000363773 558.95 271.9 -2.05572

1.03297E-06 1147.45 4528.78  
7.31276E-08 13768.7 38446.3

/// 278 /// 279 /// 280

29198

9.99826E-09 25862.8 11294.48 -2.28986

0.00106208 2171.33 1069  
0.000144329 795.175 333.625  
2.71931E-06 2493.05 1042.15  
2.71441E-05 897.775 254.9  
2.67846E-05 1112.68 377.35

537

54882 /// 8637

54882 /// 8637

54882 /// 8637

441425 /// 441430 /// 647595 /// 728371 /// 728747 /// 728788 /// 729171 /// 84210

441430 /// 728747 /// 728788 /// 84210

|             |        |         |         |             |         |          |          |             |         |         |  |
|-------------|--------|---------|---------|-------------|---------|----------|----------|-------------|---------|---------|--|
|             |        |         |         | 0.000200816 | 1661.33 | 571.9    | -2.90492 |             |         |         |  |
|             |        |         |         |             |         |          |          | 0.00356452  | #DIV/0! | 698.825 |  |
| 7.21221E-12 | 1011.3 | 10641.2 | 10.5223 | 3.57496E-15 | 672.875 | 19824.03 | 29.4617  | 1.29782E-16 | 605.4   | 28664   |  |
|             |        |         |         |             |         |          |          | 0.000254378 | 1036.6  | 2456.55 |  |
|             |        |         |         | 3.68282E-07 | 2892.8  | 1214.675 | -2.38154 | 0.00106812  | 780.85  | 314.133 |  |
|             |        |         |         |             |         |          |          |             |         |         |  |
|             |        |         |         | 6.82072E-05 | 1450.3  | 5228.025 | 3.60479  | 2.17322E-05 | 2043.13 | 8156.08 |  |
|             |        |         |         |             |         |          |          | 0.00113484  | 5956.75 | 13794.7 |  |
|             |        |         |         |             |         |          |          | 8.49174E-06 | 1834.55 | 6693.78 |  |
|             |        |         |         |             |         |          |          |             |         |         |  |
|             |        |         |         |             |         |          |          | 0.000343601 | 1721.28 | 786.725 |  |
|             |        |         |         |             |         |          |          | 0.000137157 | 1770.33 | 520.325 |  |
|             |        |         |         |             |         |          |          |             |         |         |  |
|             |        |         |         |             |         |          |          | 2.79814E-06 | 1871    | 780.467 |  |
|             |        |         |         |             |         |          |          | 1.07204E-06 | 4964.88 | 2181.7  |  |
|             |        |         |         |             |         |          |          |             |         |         |  |
|             |        |         |         |             |         |          |          | 9.08764E-05 | 139.4   | 1306.05 |  |

1.99373E-06 4370.25 2000.225 -2.18488 0.000010768 4933.78 2462.23

8.74289E-05 1968.13 958.275

4.20069E-06 2126.85 996.55

9.05814E-06 1868.55 776.5

50489  
50489  
50489

0.00180317 2519.3 743

8.09213E-05 1471.8 708.925 -2.0761

0.000262149 9162.85 18689.3

|             |             |           |          |          |             |         |         |
|-------------|-------------|-----------|----------|----------|-------------|---------|---------|
|             |             |           |          |          | 2.90075E-07 | 852.575 | 7684.45 |
|             | 1.33421E-05 | 9696.93   | 4489.9   | -2.15972 | 1.2071E-07  | 10187.8 | 4020.98 |
|             |             |           |          |          | 2.17358E-06 | 19924.3 | 7076.68 |
|             | 9.36259E-06 | 2017.18   | #DIV/0!  | #DIV/0!  |             |         |         |
|             | 6.35372E-08 | 1564      | 637.975  | -2.45151 |             |         |         |
| 7.16376E-05 | 21331.8     | 10075.625 | -2.11717 |          |             |         |         |
| 7.18796E-05 | 24456.4     | 11103.9   | -2.20251 |          |             |         |         |

|            |         |          |         |  |             |         |         |
|------------|---------|----------|---------|--|-------------|---------|---------|
| 0.00231928 | 4471.48 | 2056.325 | -2.1745 |  | 2.43552E-05 | 10253.8 | 5021.93 |
|------------|---------|----------|---------|--|-------------|---------|---------|

|             |         |          |          |  |             |         |         |
|-------------|---------|----------|----------|--|-------------|---------|---------|
| 3.61482E-12 | 3109.58 | 7373.325 | 2.37117  |  | 0.000915775 | 946.7   | 1982.75 |
| 1.23815E-05 | 2451.4  | 6237.85  | 2.54461  |  | 0.00267218  | 860.3   | 1926.25 |
|             |         |          |          |  | 3.75668E-05 | 2754.5  | 6420.5  |
| 4.00096E-08 | 8405.03 | 2862.475 | -2.93628 |  | 0.000976382 | 1119.68 | 2277.8  |
|             |         |          |          |  | 3.89523E-12 | 13188.2 | 2698.98 |

29446

|             |             |          |          |          |             |         |         |
|-------------|-------------|----------|----------|----------|-------------|---------|---------|
|             |             |          |          |          | 2.31553E-08 | 5569.6  | 12102.6 |
|             |             |          |          |          | 1.96823E-09 | 4169.65 | 8340    |
| 3.26038E-05 | 2725.25     | 1336.9   | -2.03848 |          |             |         |         |
|             |             |          |          |          |             |         |         |
|             | 7.20032E-07 | 2148.13  | 663.425  | -3.23793 |             |         |         |
|             | 3.36146E-09 | 4539.98  | 1639.5   | -2.76912 |             |         |         |
| 2.62171E-06 | 2605.13     | 8564.075 | 3.2874   |          | 1.13837E-10 | 936.4   | 5149.03 |
| 2.74019E-05 | 8632.23     | 24770.45 | 2.86953  |          | 4.64374E-09 | 3267    | 15847.4 |
|             |             |          |          |          | 2.63691E-06 | 6478.5  | 3087.3  |
| 2.0646E-06  | 4934.68     | 2404.925 | -2.0519  |          |             |         |         |
| 4.04487E-06 | 4210.75     | 1726.925 | -2.43829 |          | 1.10666E-08 | 5655.15 | 1572.2  |

|  |  |  |  |  |             |         |         |
|--|--|--|--|--|-------------|---------|---------|
|  |  |  |  |  | 8.02708E-09 | 2929.63 | 7129.13 |
|  |  |  |  |  | 0.00105287  | 2444    | 5738.43 |

0.000709712 5842.15 2520.85 -2.31753

0.00334721 638.55 #DIV/0!

1.30669E-09 3163.23 9824.175 3.10575  
1.89898E-06 2148.15 6020.025 2.80242

9.81472E-13 2116.18 9915.48  
6.30246E-08 1443.48 4968.33

1.05467E-08 1327.7 457.35

0.000440721 440.075 926.8

2.05886E-06 2987.53 1430.35

2.71773E-05 257.5 631.025  
9.92732E-06 2508.18 5168.98

0.00106473 1421.58 2980.48

1.16427E-08 794.675 2244.65

5.41515E-06 4221.23 9240.9

1.58749E-07 604.95 1643.15

2.822E-08 749.125 2396.9

1.19247E-05 619.575 2182.53

3.39249E-05 1166.45 551.55

3.81554E-05 9496.63 4634.43

1.36666E-05 20822.5 9828.23

6.25338E-06 11671.8 5578.7

1.7255E-07 1345.37 486.4 -2.76597

2.23677E-06 7833.33 16905.5

1.60522E-06 8096.83 17908.7



|             |         |          |         |             |         |         |
|-------------|---------|----------|---------|-------------|---------|---------|
|             |         |          |         | 0.00433318  | 855.175 | 398.5   |
|             |         |          |         | 0.000838055 | 960.3   | #DIV/0! |
| 2.53224E-07 | 10535.7 | 36576.13 | 3.47164 | 1.14249E-10 | 5919.9  | 36895.1 |
|             |         |          |         | 3.19502E-09 | 6172.3  | 1600.38 |
|             |         |          |         | 1.08034E-06 | 21366.9 | 46815.4 |
|             |         |          |         | 1.77274E-06 | 26127.8 | 54300.2 |
|             |         |          |         | 5.47588E-05 | 1321.1  | 427.6   |
|             |         |          |         | 0.000128294 | 2462.25 | #DIV/0! |
|             |         |          |         | 0.00258624  | 454.775 | 1042    |
|             |         |          |         | 0.000219902 | 712.475 | 1906.35 |
|             |         |          | 2.67567 | 0.000610849 | 479.9   | 1256.05 |
|             |         |          |         | 9.64446E-05 | 5138.43 | 17146.3 |
| 9.23614E-12 | 8988.38 | 29562    | 3.28891 | 2.6882E-13  | 4907.08 | 19303.3 |

0.00292555 3662.53 1800.58

5316 /// 85318 /// 85319  
5319

|             |        |          |          |             |         |         |
|-------------|--------|----------|----------|-------------|---------|---------|
| 6.28829E-05 | 8120.3 | 3723.775 | -2.18066 | 0.000394553 | 15438.1 | 7357.03 |
| 2.41347E-05 | 541.6  | 198.675  | -2.72606 | 5.26286E-05 | 772.375 | 226.55  |
|             |        |          |          | 0.000341091 | 843.85  | 406.15  |

|             |         |           |         |             |         |          |
|-------------|---------|-----------|---------|-------------|---------|----------|
| 0.000685306 | 680.9   | 2231.425  | 3.27717 | 1.28252E-05 | 1022.37 | 4117.3   |
| 3.05211E-10 | 9167.28 | 27446.65  | 2.99398 | 3.36531E-13 | 3941.65 | 16453.6  |
|             |         |           |         | 0.00012719  | 1656.15 | 824.7    |
| 1.32144E-05 | 5746.3  | 15435.525 | 2.68617 | 1.76716E-07 | 4159.2  | 17125.28 |
|             |         |           |         | 3.4472E-06  | 21567.6 | 64555.85 |
|             |         |           |         | 2.30059E-11 | 4501.8  | 33716.4  |
|             |         |           |         | 2.53625E-06 | 21637.1 | 62728.9  |
|             |         |           |         | 0.00205564  | 194.6   | 1133.025 |
|             |         |           |         | 5.82233     |         |          |
|             |         |           |         | 1.40163E-05 | 5798.1  | 2069.775 |
|             |         |           |         | 3.52488E-07 | 6027.1  | 1668.875 |
|             |         |           |         | 4.61298E-06 | 10469   | 3504.775 |
|             |         |           |         | 7.92026E-06 | 6654.03 | 2273.43  |
|             |         |           |         | 1.14406E-07 | 6974.8  | 1800.85  |
|             |         |           |         | 6.05733E-07 | 12122.6 | 3343.65  |
|             |         |           |         | 0.000580945 | 1608.83 | 630.7    |
|             |         |           |         | 1.66369E-06 | 8248.68 | 4119     |
|             |         |           |         | 5.86335E-05 | 3820.35 | 12522.43 |
|             |         |           |         | 3.27782     |         |          |
|             |         |           |         | 1.66284E-05 | 2598.88 | 10472.8  |
|             |         |           |         | 0.000105225 | 5521.03 | 2367.175 |
|             |         |           |         | -2.33233    |         |          |
|             |         |           |         | 0.000252245 | 7833.95 | 3694.33  |
|             |         |           |         | 0.000387999 | 6443.7  | 3045.98  |
|             |         |           |         | 0.000093237 | 2412.8  | 1129.675 |
|             |         |           |         | -2.13584    |         |          |
|             |         |           |         | 0.000168928 | 13025.6 | 6132.05  |
|             |         |           |         | -2.12419    |         |          |
|             |         |           |         | 6.97196E-05 | 13945.9 | 6876.85  |
|             |         |           |         | -2.02795    |         |          |
|             |         |           |         | 1.37045E-06 | 15917.3 | 3941.9   |

|             |         |          |         |             |         |          |         |             |         |         |
|-------------|---------|----------|---------|-------------|---------|----------|---------|-------------|---------|---------|
| 1.47977E-07 | #DIV/0! | 1492.275 | #DIV/0! | 2.45803E-13 | 180.1   | 5440.75  | 30.2096 | 5.59621E-12 | 166.4   | 5983.38 |
| 3.76047E-18 | 269.8   | 3941.15  | 14.6077 | 2.23554E-22 | 295.475 | 11908.58 | 40.3032 | 8.98594E-23 | 319.667 | 13499.9 |
|             |         |          |         | 0.000689756 | 31611.2 | 72753.75 | 2.30152 | 0.00220829  | 38365.5 | 82021.5 |
|             |         |          |         | 2.92268E-05 | 31756   | 79335.18 | 2.49828 | 0.000405571 | 35005.7 | 73512.9 |

7.54159E-07 1268.43 2755.63

1.81591E-05 5872.23 2735.075 -2.14701

5.00087E-09 2160.85 643.75 -3.35666 9.21712E-10 3498.58 938.725

7.02529E-10 2997.68 10119.93 3.37592 1.23734E-05 1994.03 4153.28

6.34992E-06 792.125 310

0.00108891 880.5 2796.375 3.17589

0.000360671 1970.35 970.2

0.00109125 15277.3 7478.33

1118

0.00049821 13247.1 6389.425 -2.07328

4.17167E-05 3944.8 1393.7

0.000610788 1999.9 981.875 -2.03682

2.72302E-05 3563.65 1500.35

0.000326668 2808.78 1383.575 -2.03009

8.32174E-05 3838.08 1773.33

5.66332E-05 2744.15 1220.88

9689

4.32822E-12 15615.9 38657.85 2.47555

9.09913E-10 15343.2 31137.3

1.07419E-08 17183.6 38994.4 2.26929

3.36822E-08 14523.4 31003.9

2.9401E-08 5997.55 13273.2

1.37193E-10 19681.8 46143.4

1.6112E-09 8552.1 21398.5

3.98441E-05 3423.4 1659.58

5.5365E-07 24579.2 11933.9

2.60471E-05 24886.9 11253.1

0.00416196 253.1 778

2.40317E-06 914.275 401.875

2.46615E-05 777.925 1742.55

8.39913E-06 3630.75 1475.15

5.25689E-07 810.9 2234.3 2.75533

1.92961E-09 896.467 3795.48

0.00121098 747.433 #DIV/0! #DIV/0!

30183  
30183

2.10504E-07 741.975 356.5

0.00218584 545.5 #DIV/0! #DIV/0!

2.90253E-06 868.55 261.1 -3.3265

2.04575E-06 2012.08 926.925 -2.1707

/// 64430

1.13421E-07 6534.93 2521.15 -2.59204

2.27926E-09 10310.9 3395

7.4012E-06 2351.7 5261.65

4.73797E-07 12908.2 26204.4

0.00100482 575.775 1483

1.13642E-05 1260.83 428.725 -2.94087

0.00190843 1879.55 938.625 -2.00245

8.32805E-05 625.475 278.7 -2.24426

1.10781E-06 4663.75 1744.675 -2.67313

0.000010619 5013.13 2108.68

8.03365E-05 490.4 1589.53

|             |         |          |         |             |         |         |
|-------------|---------|----------|---------|-------------|---------|---------|
| 3.95963E-07 | 591.175 | 2333.925 | 3.94794 | 8.89154E-09 | 532.05  | 2964.33 |
| 1.41735E-05 | #DIV/0! | 2862.667 | #DIV/0! | 1.7126E-06  | #DIV/0! | 3328.03 |

|             |       |       |
|-------------|-------|-------|
| 0.000861762 | 900.3 | 367.6 |
|-------------|-------|-------|

440400

|             |         |         |         |             |        |        |
|-------------|---------|---------|---------|-------------|--------|--------|
| 0.000119235 | 339.025 | 785.025 | 2.31554 | 1.48887E-05 | 576.55 | 1490.9 |
|-------------|---------|---------|---------|-------------|--------|--------|

|             |       |        |         |
|-------------|-------|--------|---------|
| 7.32563E-05 | 627.7 | 1256.4 | 2.00159 |
|-------------|-------|--------|---------|

|             |         |          |         |             |         |          |         |             |         |         |
|-------------|---------|----------|---------|-------------|---------|----------|---------|-------------|---------|---------|
| 1.2614E-07  | 301.375 | 1531.65  | 5.08221 | 2.98167E-10 | 137.9   | 1240.2   | 8.99347 | 4.79212E-10 | 143.8   | 2108.68 |
| 2.48632E-09 | 332.967 | 2358.625 | 7.08367 | 2.30491E-15 | 251.033 | 4601.35  | 18.3296 | 2.46575E-17 | 291.1   | 8129.3  |
|             |         |          |         | 5.03381E-16 | 224.1   | 7094.975 | 31.6599 | 1.27667E-16 | 248.433 | 11402.4 |

|             |         |        |          |             |         |         |
|-------------|---------|--------|----------|-------------|---------|---------|
| 0.000136699 | 1318.38 | 583.55 | -2.25923 | 3.68611E-05 | #DIV/0! | 2329.08 |
|-------------|---------|--------|----------|-------------|---------|---------|

|             |         |          |          |             |         |         |
|-------------|---------|----------|----------|-------------|---------|---------|
| 1.21669E-07 | 5034.15 | 2476.725 | -2.03258 | 3.02139E-07 | 5031.43 | 2194.95 |
|-------------|---------|----------|----------|-------------|---------|---------|

|             |        |          |        |             |         |         |
|-------------|--------|----------|--------|-------------|---------|---------|
| 6.18046E-05 | 2308.3 | 6962.525 | 3.0163 | 4.44638E-09 | 2437.65 | 15927.1 |
|-------------|--------|----------|--------|-------------|---------|---------|

|             |         |         |
|-------------|---------|---------|
| 2.07706E-05 | 1113.25 | #DIV/0! |
|-------------|---------|---------|

|             |      |         |
|-------------|------|---------|
| 3.39006E-07 | 2429 | 985.825 |
|-------------|------|---------|

0.00016158 4128.08 1786.55

2.23666E-07 1481.35 564.525 -2.62406 9.42768E-08 2377.25 752.375

200095 /// 644364

0.00092153 #DIV/0! 890.8  
0.000687668 756.167 1870.4

4.83859E-06 2469.6 15615.8

1.55653E-06 2681.78 1238.35

4.70208E-06 6502.85 2587.85 -2.51284

1.33188E-05 7335.25 3089.8 -2.37402

4.77369E-06 1975.7 914.95 -2.15935

3.51273E-06 #DIV/0! 1048.48

1.05374E-07 7042.2 2239.05

1.20297E-05 5963.5 2892.15

/// 149934 /// 9611

5.86503E-07 500.15 #DIV/0!

2.09415E-06 763.1 1992.775 2.61142 1.4379E-06 1084.75 2995.03

7.59429E-06 5163.1 2220.05 -2.32567

/// 2483 /// 284802 /// 642236

5.43049E-09 1071.13 403.2

1.22323E-08 1787.25 625.65 -2.85663 1.74521E-05 1140.55 516.475  
2.72223E-09 2939.8 932.6

|             |         |          |         |             |         |          |         |             |         |         |
|-------------|---------|----------|---------|-------------|---------|----------|---------|-------------|---------|---------|
| 7.24459E-08 | 1026.13 | 3231.875 | 3.14959 | 4.75554E-17 | 1274.83 | 19733.2  | 15.4791 | 1.43162E-17 | 1639.35 | 30899.5 |
| 2.55468E-09 | 928.45  | 2995.875 | 3.22675 | 4.91349E-19 | 1087.23 | 18004.03 | 16.5596 | 1.42925E-19 | 1467.9  | 27498.8 |
| 7.69338E-09 | 942.675 | 3271.85  | 3.47081 | 1.23187E-17 | 1159.2  | 17748.03 | 15.3106 | 9.8641E-19  | 1403.23 | 26888.6 |



|             |       |          |         |             |         |          |          |             |         |         |
|-------------|-------|----------|---------|-------------|---------|----------|----------|-------------|---------|---------|
|             |       |          |         | 0.000116887 | 968.2   | 435.325  | -2.22409 | 3.07668E-07 | 1964.33 | 580.6   |
|             |       |          |         | 4.59544E-08 | 1916.78 | 732.125  | -2.6181  | 3.40445E-07 | 2740.23 | 1221.1  |
| 1.61086E-05 | 966.8 | 2190.525 | 2.26575 | 5.75526E-13 | 754.375 | 4750.425 | 6.29717  | 4.34356E-15 | 752.125 | 7039.18 |

3.07364E-06 1641.78 806.525

0.00117923 901.2 389.425

3.63478E-06 2436.95 1056.03

2.26586E-08 3531.8 1494.25 -2.36359

0.000400058 2983.68 1426.1

3729  
285753

/// 29964  
/// 29964

|             |         |          |         |             |             |          |          |
|-------------|---------|----------|---------|-------------|-------------|----------|----------|
|             |         |          |         |             | 0.000126096 | 1065.03  | 371.8    |
|             |         |          |         |             | 1.95422E-06 | 5002.55  | 2455.9   |
|             |         |          |         | 1.34791E-08 | 3212.25     | 1172.5   | -2.73966 |
|             |         |          |         |             | 5.74341E-07 | 3530.53  | 1512.68  |
|             |         |          |         | 0.00163657  | 573.65      | 255.8667 | -2.24199 |
|             |         |          |         |             | 0.000030058 | 679.175  | 246.1    |
|             |         |          |         |             | 0.000199842 | 1396.08  | 605.6    |
|             |         |          |         | 4.26026E-06 | 1215.2      | 388.275  | -3.12974 |
|             |         |          |         | 5.83477E-06 | 1842.5      | 734.55   | -2.50834 |
|             |         |          |         | 0.000103842 | 1639.18     | 549.975  |          |
|             |         |          |         | 2.50727E-07 | 2764.4      | 915.15   |          |
|             |         |          |         | 4.67313E-06 | 2729.73     | 1137.95  |          |
| 1.73036E-14 | 647.275 | 7819.625 | 12.0808 | 7.85711E-19 | 387.3       | 11788.63 | 30.438   |
|             |         |          |         | 6.91132E-06 | 6363.85     | 2388.725 | -2.66412 |
|             |         |          |         | 0.000851972 | 1410.15     | #DIV/0!  | #DIV/0!  |
|             |         |          |         | 2.92345E-19 | 364.675     | 13590.6  |          |
|             |         |          |         | 0.000168512 | 7631.35     | 3456.28  |          |
|             |         |          |         | 7.12324E-09 | 4459.7      | 10588.4  |          |
|             |         |          |         | 0.000407949 | 887         | 1827.375 | 2.06017  |
|             |         |          |         |             | 0.000488962 | 497.3    | 1815.65  |
|             |         |          |         |             | 1.55028E-05 | 982.775  | 1993.23  |
|             |         |          |         |             | 0.00010411  | 888.675  | 334.7    |
|             |         |          |         | 1.06671E-05 | 906         | 355.725  | -2.54691 |
|             |         |          |         |             | 4.54141E-09 | 1214.9   | 338.533  |
|             |         |          |         |             | 0.000175089 | 1269.4   | 541.2    |
|             |         |          |         |             | 0.00237579  | 13456.4  | 29324.4  |
|             |         |          |         |             | 5.67449E-05 | 6182.95  | 12546.6  |
|             |         |          |         | 0.00027854  | 774.575     | 1568.95  | 2.02556  |
|             |         |          |         |             | 5.3031E-08  | 960.1    | 3810.23  |

|             |         |          |          |             |         |         |
|-------------|---------|----------|----------|-------------|---------|---------|
| 0.000621871 | 19707.4 | 7304.5   | -2.69797 | 5.45214E-05 | 13225.5 | 3080.4  |
| 0.000626102 | 11023.6 | 4101.575 | -2.68765 | 0.000071854 | 7121.38 | 1951.48 |
| 1.25541E-06 | 8640.48 | 3356.2   | -2.57448 | 5.40125E-05 | 13359.3 | 6375.53 |

/// 808  
/// 808  
/// 808  
/// 808  
/// 808

|             |         |         |
|-------------|---------|---------|
| 7.09716E-07 | 4236.18 | 1958.73 |
|-------------|---------|---------|

|            |         |         |         |             |        |         |
|------------|---------|---------|---------|-------------|--------|---------|
| 0.00047639 | 1357.23 | #DIV/0! | #DIV/0! | 0.00129123  | 812.5  | 366     |
|            |         |         |         | 0.000031499 | 1905.7 | #DIV/0! |

|             |         |          |         |             |         |         |
|-------------|---------|----------|---------|-------------|---------|---------|
|             |         |          |         | 1.82956E-08 | 3756.33 | 1623.2  |
|             |         |          |         | 0.00101046  | 5119.48 | 2467.75 |
|             |         |          |         | 2.0054E-11  | 5445.93 | 1792    |
| 0.000911318 | 470.6   | 1125.55  | 2.39173 | 0.00333645  | #DIV/0! | 842.7   |
| 3.66703E-05 | #DIV/0! | 1238.675 | #DIV/0! | 6.60882E-06 | #DIV/0! | 946.833 |

|             |        |         |         |             |         |         |
|-------------|--------|---------|---------|-------------|---------|---------|
|             |        |         |         | 0.000138003 | 1805.58 | 4096.7  |
| 1.85043E-05 | 8493.2 | 18847.5 | 2.21913 | 1.57999E-05 | 6732.78 | 14659.9 |

|            |         |        |
|------------|---------|--------|
| 0.00254521 | 679.825 | 295.65 |
|------------|---------|--------|

2.95699E-06 1069.4 411.375

0.000609216 1797.8 605.2 -2.97059

3.87824E-05 2899.58 1183.5

1.14826E-10 3881.38 1443.575 -2.68872

3.78E-10 5511.35 2248.18

9.92504E-06 1499.23 642.675 -2.33279

2.40695E-07 5547.55 12712.3

3.90238E-09 2041.28 8330.23

0.00144684 2003.73 976.325 -2.05231

440278

0.000627524 1016.95 499 -2.03798

0.00020744 1026.98 488.15 -2.10381

7.11885E-06 1212.45 476.6

3.71823E-07 2984.1 967.8 -3.08338

5.34829E-06 5051.28 1965.3

53972

1.00626E-06 1218.3 535.225 -2.27624

0.00130783 593.2 275.475

3.55859E-06 1729.28 786.2

4.09965E-08 777.85 2377.55

2.05969E-05 #DIV/0! 2217.33

3.14075E-06 575.425 2504.15

0.000105165 #DIV/0! 711.033

7.79338E-06 1054.73 501.075

3.90326E-05 1861.78 474.25

0.00118928 704.95 235.75

0.000343291 706.925 307.1333 -2.30169

0.00432132 929.175 457.075

1.08387E-07 8662.58 3761.18

2.54802E-07 8083.15 3721.68

2.38449E-05 1239.58 3184.88

1.30581E-06 #DIV/0! 11577.43 #DIV/0!

5348 /// 6349 /// 728830

0.00143309 15910.2 46602.88 2.92912

0.00089253 6616.05 28841.5

0.00136379 9263.25 30063.4

5.03244E-07 7277.38 3264.95 -2.22894

2.45111E-06 8239.43 4009.8

5.57637E-08 8223.45 3371.9

|             |         |          |          |             |         |         |
|-------------|---------|----------|----------|-------------|---------|---------|
| 9.6255E-08  | 15156.5 | 7125.975 | -2.12694 | 5.08854E-09 | 15488.7 | 6209.9  |
| 0.000577557 | 7128.43 | 2745.4   | -2.5965  | 3.17524E-05 | 8044.7  | 2294.6  |
| 3.41941E-09 | 16973.3 | 7545.025 | -2.2496  | 1.57657E-10 | 18278.2 | 7263.75 |
| 1.65343E-07 | 4038.98 | 1547.625 | -2.60979 | 9.43197E-09 | 5236.8  | 1541.68 |
| 5.81785E-05 | 4066.7  | 2030.35  | -2.00296 | 7.52614E-09 | 6067.3  | 1973.85 |
| 3.61647E-06 | 4209.65 | 1758.1   | -2.39443 | 6.13638E-09 | 7448.9  | 2126.38 |
| 1.5469E-07  | 5729.28 | 2711.2   | -2.11319 | 1.35795E-10 | 9171.98 | 3212.88 |
|             |         |          |          | 2.84873E-07 | 5202.3  | 2172.13 |
|             |         |          |          | 0.000864428 | 14326.4 | 6344.28 |

9230

|             |         |          |         |
|-------------|---------|----------|---------|
| 0.000364505 | 23293.5 | 9088.725 | -2.5629 |
|-------------|---------|----------|---------|

9034

|             |         |          |         |             |         |         |
|-------------|---------|----------|---------|-------------|---------|---------|
| 0.000246779 | 8658.95 | 25847.03 | 2.98501 | 3.17364E-05 | 11423.5 | 38810.5 |
|-------------|---------|----------|---------|-------------|---------|---------|

549553

|             |         |     |
|-------------|---------|-----|
| 8.61439E-08 | 1131.65 | 475 |
|-------------|---------|-----|

|             |         |         |
|-------------|---------|---------|
| 6.39678E-07 | 1427.75 | 535.225 |
|-------------|---------|---------|

|             |         |         |
|-------------|---------|---------|
| 6.85989E-05 | #DIV/0! | 702.533 |
|-------------|---------|---------|

|             |         |          |          |             |         |         |
|-------------|---------|----------|----------|-------------|---------|---------|
| 0.000195909 | 19957.9 | 42768.1  | 2.14292  | 7.19189E-06 | 26100.2 | 73389.1 |
|             |         |          |          | 5.76467E-07 | 8730.55 | 34569.1 |
| 1.09333E-05 | 18687.6 | 8241.975 | -2.26737 |             |         |         |
| 0.000060676 | 22445.1 | 7778.375 | -2.88558 | 2.26032E-08 | 30949.5 | 6726.3  |

|            |        |         |
|------------|--------|---------|
| 0.00410673 | 9050.8 | 18737.8 |
|------------|--------|---------|

0.00275792 10165.9 22908.3

4.51166E-06 19189.1 9504.15

3

0.00112017 2329.93 7234.43

2.04232E-06 5121.05 15773.03 3.08004  
0.00226712 915.35 348 -2.63032

5.79037E-08 4785.55 19418.2

326 /// 927

1.92364E-05 702.275 344.525 -2.03839  
3.5163E-06 7256.93 2765.725 -2.62388

9.67558E-08 8778.08 2821.1

729948 /// 730314

384  
384  
384

1.012E-07 4351.85 2099.75

0.000657049 22317.2 44997.2  
0.000220631 5808.7 15522.3

4.87475E-07 #DIV/0! 1247.6

9.59666E-09 21011 7723.175 -2.72052

3.18315E-07 27358.2 12680.3  
4.54513E-07 1761.4 5150.95  
0.000282546 614.6 2553.28  
5.89033E-07 2862.83 1067.85

0.000546691 976.4 #DIV/0!

0.000401709 7264.9 29978.1

2.88559E-08 3410.8 1169.55 -2.91634  
5.29479E-05 1277.13 503.8 -2.53498  
9.74401E-07 3888.25 1889.425 -2.0579

2.98538E-06 5639.13 2461.83

0.000228864 2368.28 953.325

0.00107592 1059.08 516.133

0.00256767 35811.3 16755.45 -2.13729  
0.00239138 2452.9 949.3 -2.5839

2.89397E-06 32301 8954.18  
3.23886E-05 1711.4 406.2

1.70942E-07 308.75 1079.8 3.49733

1.54264E-10 263.2 1390.63



3.3683E-08 17762.5 6961.175 -2.55165  
3.57304E-06 10024 4615.975 -2.17158

9.64092E-06 823.9 340.4 -2.42039 1.31955E-06 806.25 291.375  
2.11303E-05 512.733 1808.65  
2.05983E-06 920.925 3013 3.27171 3.95554E-08 1758.53 8205.25  
0.00169483 311.075 667.425

6.52958E-06 602.6 289.1 -2.0844

5.59479E-07 10553.9 23711.4

6.45136E-08 10038.1 4652.35 -2.15765 1.04836E-08 12671.6 5140.4

2.50709E-05 952.9 2603.03

4.51668E-06 12722.5 5851.525 -2.17421

0.000160633 819.425 #DIV/0!  
0.00327747 510.233 248.8  
3.1751E-06 2619.25 350.5

4.94265E-05 1649.75 423.0333 -3.89981

0.000823928 958.375 2651.275 2.76643

6.39317E-08 2767.68 1216.63

0.000178857 1639.28 3668.85  
0.000080033 1458.28 3186.83

0.000879323 655.125 306.175 -2.13971

2.46541E-09 28986.6 6542.9

387837

0.00118699 52123.6 21761.2  
0.00281234 45024.5 20194.7  
0.00408807 15651.2 7502.38

0.00251835 7695.38 2227.05 -3.45541

1.31482E-07 1929 16659.9

7.19935E-06 3465.88 6973.2

6.74995E-05 #DIV/0! 517.567  
7.13918E-05 475.433 1436.43  
0.00133176 512.275 1495.53

0.000785811 661.475 273.5

1.01891E-05 2122.1 973.175

2.64944E-06 3797.55 1701.8

543827 /// 653355 /// 728577 /// 79937

4.99607E-05 1655.38 541.175

0.000817015 72 963.7

3.06845E-06 2373.63 993.725 -2.38861

1.05818E-07 #DIV/0! 2174.58

0.000130574 #DIV/0! 531.775

3.90798E-06 1911.75 824.65

4.4562E-06 1157.58 576.6 -2.00759

1.08102E-09 1226.23 474.767

0861

0.000242742 4984.5 1407.15 -3.54227

3.51976E-08 #DIV/0! 2829.98

0.000137739 8062.35 1960.1

2.88746E-05 3010.1 775.15 -3.88325 1.13722E-05 4334.8 938.175

0.000357539 890.825 415.2  
0.000174195 828.567 #DIV/0!

4.01165E-06 4848.6 11337 2.3382 4.11137E-07 4928.25 12784.6

2.50766E-05 558.5 233.525 -2.39161

2.38467E-07 5517.3 2706.68

3106  
496

0.000229457 898.4 #DIV/0!

2.79195E-05 1197.33 2431.825 2.03105

399753 /// 642517 /// 728127 /// 729092  
119385 /// 414189 /// 653268 /// 728404

0.000498357 319.175 1118.875 3.50552

0.000719346 9469.65 4495.75

0.000173472 19415.6 8462.4

6.23949E-06 3434.48 1567.88

4.60815E-06 4054.63 1553.8 -2.60949  
2.95626E-06 6300.3 2557.5 -2.46346  
0.000141412 5498.63 2625.175 -2.09457

0.000124611 18311.8 37820.6 2.06537

0.000458108 2064.7 12680.5

0.000155084 3181.8 1258.225 -2.5288 4.26705E-06 2971.4 909.325

91966  
91966  
/// 286967

|             |         |          |          |             |         |         |
|-------------|---------|----------|----------|-------------|---------|---------|
|             |         |          |          | 0.00118074  | 1249.28 | 583.925 |
|             |         |          |          | 8.04341E-06 | 685.525 | 322.275 |
|             |         |          |          | 2.44687E-05 | 1215.85 | #DIV/0! |
| 0.0022621   | 721.567 | #DIV/0!  | #DIV/0!  | 0.00011103  | 984.875 | #DIV/0! |
| 6.13961E-07 | 4810.4  | 2258.125 | -2.13026 |             |         |         |
|             |         |          |          | 0.000235071 | 1647.18 | 355.3   |
|             |         |          |          | 0.00213627  | 794.867 | #DIV/0! |
| 4.99221E-08 | 1881.8  | 4722.325 | 2.50947  | 1.56564E-05 | 1844.65 | 4266.93 |

0.000010982 5644.1 2262.4

|             |         |         |         |             |         |         |
|-------------|---------|---------|---------|-------------|---------|---------|
|             |         |         |         | 4.94504E-05 | 4821.05 | 2358.48 |
| 1.1181E-13  | 2404.7  | 8490.85 | 3.53094 | 1.27066E-15 | 3075.58 | 13152.4 |
| 3.01092E-10 | 7942.48 | 25390   | 3.19674 | 6.84456E-14 | 9172.75 | 49215.1 |

J054 /// 57055 /// 57135 /// 732447

|             |      |       |        |             |         |       |
|-------------|------|-------|--------|-------------|---------|-------|
| 0.000121571 | 1336 | 615.1 | -2.172 | 1.58543E-05 | 1161.88 | 493.6 |
|             |      |       |        | 9.05735E-05 | 1161.6  | 577.9 |

|             |         |          |         |             |         |         |
|-------------|---------|----------|---------|-------------|---------|---------|
| 0.000339363 | 18716.8 | 98337.33 | 5.25395 | 2.63582E-07 | 10085.9 | 32086.7 |
|             |         |          |         | 4.68316E-06 | 8491.6  | 76839.8 |
|             |         |          |         | 1.39802E-05 | 4403.28 | 1880.58 |
|             |         |          |         | 0.000373078 | 3925.38 | 1785.25 |

J081 /// 642846

|             |         |          |          |             |         |         |
|-------------|---------|----------|----------|-------------|---------|---------|
| 1.29771E-06 | 4428    | 11898.43 | 2.68709  | 1.16446E-05 | 3840.6  | 9771.05 |
| 1.60864E-06 | 3352.58 | 9534.225 | 2.84385  | 0.000717979 | 3519.7  | 7331.28 |
| 5.19419E-08 | 1926.38 | 5814.9   | 3.01857  | 1.89042E-05 | 1850.25 | 4475.18 |
| 1.34502E-06 | 2320.45 | 5880.475 | 2.5342   | 4.16134E-05 | 2337.7  | 5033.75 |
| 1.40126E-07 | 4596.83 | 15021.58 | 3.26782  | 0.000147947 | 4071.58 | 8776.95 |
| 6.74627E-05 | 5597.9  | 12914.15 | 2.30696  |             |         |         |
| 1.16902E-08 | 3048    | 7574.825 | 2.48518  |             |         |         |
| 9.76426E-08 | 1788.6  | 533.9667 | -3.34965 | 6.42913E-07 | 2789.9  | 903.025 |
| 2.17398E-05 | 858.367 | #DIV/0!  | #DIV/0!  | 0.000973093 | 1578.9  | 643.6   |

|             |         |          |         |             |         |       |
|-------------|---------|----------|---------|-------------|---------|-------|
| 1.82971E-11 | 2527.25 | 5961.825 | 2.35902 | 6.22518E-14 | 2625.65 | 7954  |
|             |         |          |         | 0.000116233 | 1406.8  | 683.2 |

|             |         |         |         |  |  |  |
|-------------|---------|---------|---------|--|--|--|
| 0.000134818 | 2983.3  | 6418.7  | 2.15154 |  |  |  |
| 3.75935E-06 | 856.875 | 1861.15 | 2.17202 |  |  |  |

|             |         |          |          |             |        |        |
|-------------|---------|----------|----------|-------------|--------|--------|
| 2.75749E-09 | 7133.55 | 2556.675 | -2.79017 | 2.76744E-08 | 8410.4 | 3511.6 |
| 0.000038958 | 2758.65 | 1217.375 | -2.26606 |             |        |        |



58 /// 728358

7.11299E-06 12092.3 4502.925 -2.68542 3.16525E-08 21662.1 5858.23

503614

5.37311E-06 15665.3 37188.7  
1.36814E-07 1310.18 6899.13  
1.10046E-05 1112.95 4586

359

7.55928E-06 4169.93 1577.5 -2.64338 7.48252E-08 5934.78 1618.3

1.94874E-06 4488.95 2003.73

3.11135E-07 2369.8 584.625 -4.05354 2.44246E-07 2859.08 679.9  
1.09107E-07 1847.35 897.7 -2.05787 5.69577E-07 2308.28 814.3  
2.69548E-08 2064.9 #DIV/0! #DIV/0! 1.48893E-07 2347.73 781.9

2.57464E-09 2798.8 750.925 -3.72714 1.45208E-08 4986.3 1555.35  
4.47368E-09 2653.33 1049.225 -2.52884 1.85488E-08 4314.08 1802.3

0.00004184 13444 6238.95 -2.15485 1.0762E-06 18601 6698.85  
2.73681E-05 10015 4041.925 -2.47777 3.68313E-05 12580.6 5654.95  
0.000501756 24676.2 11509.83 -2.14392 0.000302966 27559 12269

0.000683805 14799.4 6929.8 -2.13562

/// 285023  
140354

1.51908E-11 3205.43 961.333  
4.93223E-07 3989.58 1721.1  
0.00171254 452.1 1051.45

3238 /// 728340 /// 730394

0.000208535 442.525 1104.38  
0.000132901 1638.65 751.05  
4.63906E-06 3238.38 758.45

8.67178E-09 12156.7 30934.5

0.00027207 2099.5 5952.43

3.77422E-07 7002.4 3105.9

0.000978122 724.175 2009.925 2.77547  
6.79023E-05 4848.48 13374.4 2.75848  
3.95464E-07 3422.48 9489.73  
5.52141E-06 1132.25 5018  
1.07588E-06 6454.25 24640.3

0.000583849 5512.48 2676.7 -2.05943

4.56735E-09 14943.9 4536.8 -3.29392

0.00335758 #DIV/0! 1254.8  
2.31826E-11 31834.7 7422.58  
0.00262709 3298.2 1058.43

400206

349152 /// 442523 /// 554236

/// 113878

|             |         |          |          |             |         |          |          |
|-------------|---------|----------|----------|-------------|---------|----------|----------|
|             |         |          |          | 0.00306092  | 720.375 | 347.1    |          |
|             |         |          |          | 9.64696E-05 | 577.5   | 1345.55  |          |
|             |         |          |          | 0.000323819 | 8162.95 | 3657.1   |          |
| 0.000208226 | 1493.88 | 606.15   | -2.46453 |             |         |          |          |
| 0.000325863 | 1722.23 | #DIV/0!  | #DIV/0!  |             |         |          |          |
|             |         |          |          | 0.000557247 | 563.225 | 2194.55  |          |
| 0.000012837 | 813.267 | 2034.55  | 2.5017   |             |         |          |          |
| 2.17601E-06 | 3515.95 | 13309.58 | 3.78548  |             |         |          |          |
| 4.78897E-07 | 1345.45 | 5266.15  | 3.91404  |             |         |          |          |
|             |         |          |          | 2.4831E-07  | 1531.7  | #DIV/0!  |          |
| 3.01967E-08 | 674.933 | 1955.3   | 2.89703  | 1.18394E-07 | 1222.88 | 3131.05  |          |
| 0.000762661 | #DIV/0! | 704.5333 | #DIV/0!  | 9.99256E-05 | 215.05  | 1004.88  |          |
| 9.40858E-06 | #DIV/0! | 1506.325 | #DIV/0!  | 1.20755E-06 | 436.6   | 2057.38  |          |
| 0.00170703  | 935.6   | 2311.275 | 2.47037  |             |         |          |          |
|             |         |          |          | 0.000202064 | 4780.8  | 1935.1   |          |
|             |         |          |          | 7.23977E-06 | 824.45  | 328.6333 | -2.50872 |
|             |         |          |          | 1.77637E-08 | 1579.58 | 421.65   |          |
| 0.00117446  | 705.8   | #DIV/0!  | #DIV/0!  | 3.16878E-06 | 562.2   | 157.6    |          |
| 0.00118454  | 709.067 | #DIV/0!  | #DIV/0!  |             |         |          |          |
|             |         |          |          | 2.40742E-07 | 5452.93 | 15111.88 | 2.77133  |
|             |         |          |          | 1.28227E-08 | 4589.15 | 16163.8  |          |
|             |         |          |          | 0.000134998 | 3098    | 964.675  |          |
|             |         |          |          | 0.000159358 | 2006.9  | 742.525  |          |

1.21058E-05 2360.08 1146.78

0.000205346 3052.55 1208.35 -2.52621 0.000217646 2684.1 1151.575 -2.33081 2.57909E-05 2777.03 815.25

0.000983854 4776.33 2199.4

3.65653E-06 2763.08 1299.725 -2.12589

/// 146779

7.8706E-06 #DIV/0! 804.8 #DIV/0! 1.6654E-07 #DIV/0! 900.65

0.000317279 8784.43 22071.33 2.51255  
5.96615E-06 1913.8 6507.1 3.40009 8.78143E-05 3995.95 10969.5  
3.06721E-06 4363.73 11576.8 2.65296 1.05128E-05 7200.5 18524.8

1.42021E-08 12688.8 36201.08 2.853 2.15829E-05 6005.6 12193  
2.63979E-06 11711.8 29314.33 2.50298 1.48658E-05 4934.9 11627.7  
7.86461E-07 8480.8 27514.95 3.24438 6.50723E-06 3014.38 8952.63  
1.09807E-06 3011.98 10840.83 3.59924 9.28562E-06 1178.2 3596.33  
6.898E-10 7296.3 28652.45 3.92698  
0.00422437 1655.58 4137.8

0.00202173 1486.73 675.1 -2.20223 2.36777E-05 2189.63 612.6  
1.38879E-05 2744.05 1004

0.00121418 1608.68 4534.6 2.81884 2.53147E-05 1305.38 5607.5

0.000632487 666.3 #DIV/0! #DIV/0!

192670  
192670

7.58878E-07 5270.18 2351.725 -2.24098

1.20886E-07 7077.03 2835.05  
0.000291503 4250.35 1889.63  
1.16821E-05 31562.8 14245.9  
  
0.00124115 1121.78 541.375

3663  
3663

4.64824E-09 1247.23 504.85

0.000726197 954.575 373.175  
4.45851E-05 941.925 2291.43  
0.000613415 845.667 #DIV/0!

3637

0.000401178 10144.4 20568.53 2.02757

4.96863E-06 3376.48 7449.7  
2.52914E-05 1772.8 4706.88  
6.97349E-05 1753.38 3759.45  
  
0.000270753 1333.65 3354.48  
  
0.000127765 4491.43 1890.53

|             |         |           |         |             |             |          |
|-------------|---------|-----------|---------|-------------|-------------|----------|
| 0.0016233   | 1186.3  | 2878.025  | 2.42605 | 8.66659E-05 | 875.8       | 2528.73  |
| 2.36519E-05 | 709.575 | 1570.1    | 2.21273 | 4.47697E-05 | 720.533     | 1622.95  |
|             |         |           |         | 3.56244E-06 | 963.325     | 2619.4   |
|             |         |           |         | 4.15855E-06 | 3495.23     | 9994.2   |
|             |         |           |         | 0.000130679 | 1945.6      | 5345.68  |
|             |         |           |         | 4.4884E-06  | 382.433     | 983.425  |
|             |         |           |         | 0.00382219  | 812.275     | 2223.6   |
| 0.00167278  | 340.55  | 772.15    | 2.26736 | 6.11156E-05 | 311.75      | 940.7    |
|             |         |           |         | 5.76427E-06 | 10641.1     | 21639.7  |
| 3.44305E-06 | 10361.1 | 34849.55  | 3.36349 | 2.14679E-09 | 12696.6     | 77559.8  |
| 1.60954E-05 | 7911.88 | 27086.425 | 3.42352 | 6.10872     | 1.8566E-12  | 7151.55  |
|             |         |           |         | 9.2955E-08  | 9618.2      | 53166.35 |
|             |         |           |         | 5.97666E-06 | 206.3       | 1805.025 |
|             |         |           |         | 8.74952     | 1.1765E-07  | 235.2    |
|             |         |           |         | 9.3237E-08  | #DIV/0!     | 1044.025 |
|             |         |           |         | #DIV/0!     | 1.30237E-10 | #DIV/0!  |
|             |         |           |         | 1.30237E-10 | #DIV/0!     | 3820.43  |
|             |         |           |         | 1.15656E-05 | 6993.93     | 3247.25  |
|             |         |           |         | -2.1538     | 4.5965E-06  | 7158.38  |
|             |         |           |         |             | 6.58502E-05 | 3619.05  |
|             |         |           |         |             | 6.15366E-05 | 1366.4   |
|             |         |           |         |             |             | 548.425  |
|             |         |           |         |             | 0.000259198 | 2016.7   |
|             |         |           |         |             | 1.52374E-07 | 23358    |
|             |         |           |         |             |             | 720      |
|             |         |           |         |             |             | 10478    |
|             |         |           |         |             | 0.00315528  | 2807.73  |
|             |         |           |         |             |             | 1084.23  |

0.00238965 915.5 #DIV/0!

0.00101513 1269.88 481.8333 -2.63551 0.00225842 1342.75 544.075  
2.35319E-06 2236.15 14828.13 6.6311 7.21158E-06 4440.63 26935  
4.35398E-11 4714.3 32360.95 6.86442 9.19476E-10 8547.68 46645.7

7.84056E-07 #DIV/0! 2771.03

5.17256E-09 7091.95 14394.4

6.54994E-07 #DIV/0! 1800.325 #DIV/0! 9.52028E-06 #DIV/0! 1599.3  
1.31465E-06 536.033 1491.8 2.78304 1.01302E-08 363.133 1521.03

7.87109E-05 2229.05 1104.53

0.00172771 #DIV/0! 2147.975 #DIV/0! 7.17139E-09 334.833 3561.75  
1.75601E-09 635.333 5489.88  
3.83324E-06 #DIV/0! 1381.07  
0.00107072 #DIV/0! 1001.83

6.48626E-05 787.2 345.8

/// 100133739 /// 28396 /// 3492 /// 3493 /// 3494 /// 3495 /// 3500 /// 3501 /// 3502 /// 3507 /// 3509

2.05107E-09 599.967 2431.55 4.05281 2.75817E-12 #DIV/0! 1821.88  
1.34102E-09 1146.5 4880.35 4.25674 2.7016E-10 #DIV/0! 3359.88  
1.96681E-08 825.5 3683.275 4.46187 5.99167E-12 #DIV/0! 2519.2



|             |         |          |          |             |         |          |          |             |         |         |
|-------------|---------|----------|----------|-------------|---------|----------|----------|-------------|---------|---------|
|             |         |          |          |             |         |          |          | 9.45212E-05 | #DIV/0! | 913.233 |
| 0.000123602 | 4486.68 | 1539.175 | -2.91499 | 7.08613E-08 | 20920.5 | 4921.575 | -4.25078 | 1.15374E-09 | 22995.1 | 3727.3  |
|             |         |          |          | 2.53517E-05 | 5836    | 983.725  | -5.93255 | 4.98913E-05 | 6156.6  | 983.15  |
|             |         |          |          |             |         |          |          | 0.00020679  | 2353.08 | 1171.25 |
|             |         |          |          |             |         |          |          | 0.000149396 | 1177    | #DIV/0! |
|             |         |          |          | 2.7858E-10  | 38813.5 | 13258.38 | -2.92747 | 1.28102E-12 | 46898.1 | 12258.2 |
|             |         |          |          | 2.53926E-09 | 29353.3 | 9634.175 | -3.04679 | 3.76651E-09 | 30740.9 | 10466.3 |

|  |  |  |  |             |         |          |          |             |      |         |
|--|--|--|--|-------------|---------|----------|----------|-------------|------|---------|
|  |  |  |  | 6.54461E-06 | 5269.08 | 2291.1   | -2.2998  | 9.81619E-06 | 6110 | 2636.45 |
|  |  |  |  | 0.000157084 | 12860.8 | 6086.175 | -2.11311 |             |      |         |

55219

|  |  |  |  |  |  |  |  |             |         |         |
|--|--|--|--|--|--|--|--|-------------|---------|---------|
|  |  |  |  |  |  |  |  | 2.39076E-08 | 1533.55 | 610.4   |
|  |  |  |  |  |  |  |  | 7.88719E-09 | 1677    | 496.375 |

|  |  |  |  |           |         |         |          |             |         |         |
|--|--|--|--|-----------|---------|---------|----------|-------------|---------|---------|
|  |  |  |  | 0.0024947 | 1307.35 | 598.925 | -2.18283 | 0.00189523  | 1694.15 | 782.925 |
|  |  |  |  |           |         |         |          | 1.06157E-05 | 1236.58 | 383.525 |

|  |  |  |  |            |        |          |        |  |  |  |
|--|--|--|--|------------|--------|----------|--------|--|--|--|
|  |  |  |  | 0.00133459 | 885.55 | 1973.625 | 2.2287 |  |  |  |
|--|--|--|--|------------|--------|----------|--------|--|--|--|

|  |  |  |  |  |  |  |  |             |         |         |
|--|--|--|--|--|--|--|--|-------------|---------|---------|
|  |  |  |  |  |  |  |  | 1.07045E-06 | 3947.88 | 1859.33 |
|--|--|--|--|--|--|--|--|-------------|---------|---------|

|             |        |         |         |             |        |          |         |             |         |         |
|-------------|--------|---------|---------|-------------|--------|----------|---------|-------------|---------|---------|
| 3.57358E-06 | 338.15 | 836.325 | 2.47324 | 2.59895E-12 | 239.7  | 2038.475 | 8.50428 | 1.45055E-13 | #DIV/0! | 1886.88 |
| 2.03032E-06 | 187.1  | 536.175 | 2.86571 | 1.36285E-07 | 189.25 | 1100.625 | 5.81572 | 8.13108E-09 | #DIV/0! | 1055.35 |

|  |  |  |  |            |       |          |         |             |         |         |
|--|--|--|--|------------|-------|----------|---------|-------------|---------|---------|
|  |  |  |  |            |       |          |         | 7.62113E-08 | 387.95  | 1839.15 |
|  |  |  |  |            |       |          |         | 1.0026E-13  | 436.7   | 4375.2  |
|  |  |  |  | 1.3328E-11 | 295.3 | 1975.875 | 6.69108 | 3.8297E-14  | 625.725 | 6838    |
|  |  |  |  |            |       |          |         | 0.000478019 | 4870.73 | 2321.6  |
|  |  |  |  |            |       |          |         | 0.00113682  | 1231.83 | 392.95  |

55747

387680 /// 55747 /// 653450  
387680 /// 55747 /// 653450  
553450

|            |        |          |         |             |         |         |
|------------|--------|----------|---------|-------------|---------|---------|
| 4.3655E-09 | 405.25 | 1111.825 | 2.74355 | 4.86142E-13 | 533.625 | 2208.58 |
|            |        |          |         | 8.79634E-07 | 1036.15 | 2639.13 |
|            |        |          |         | 2.12173E-05 | 7894.48 | 3751.18 |
|            |        |          |         | 1.08842E-08 | 1337.2  | 461.325 |

55855  
55855  
55855

|             |         |          |          |             |        |         |
|-------------|---------|----------|----------|-------------|--------|---------|
| 9.43618E-07 | 4127.38 | 1811.275 | -2.27871 | 5.37546E-07 | 5861.6 | 2479.93 |
| 4.34494E-06 | 8135.18 | 3741.05  | -2.17457 | 2.37884E-05 | 9169.5 | 4227.78 |

|             |         |         |
|-------------|---------|---------|
| 1.64372E-07 | 2316.28 | 1072.55 |
|-------------|---------|---------|

|           |        |        |         |             |         |         |
|-----------|--------|--------|---------|-------------|---------|---------|
| 0.0014352 | 472.95 | 1006.3 | 2.12771 | 1.94683E-05 | #DIV/0! | 744.225 |
|-----------|--------|--------|---------|-------------|---------|---------|

553820 /// 729533

|             |         |          |          |             |         |         |
|-------------|---------|----------|----------|-------------|---------|---------|
| 8.70186E-08 | 3433.18 | 1160.975 | -2.95715 | 0.0018969   | 4171.05 | 2084.95 |
|             |         |          |          | 1.78412E-07 | 4156.08 | 1553.95 |

|             |         |       |         |             |         |         |
|-------------|---------|-------|---------|-------------|---------|---------|
| 0.000121991 | #DIV/0! | 907.6 | #DIV/0! | 3.31872E-06 | #DIV/0! | 1129.35 |
|-------------|---------|-------|---------|-------------|---------|---------|

|             |         |       |
|-------------|---------|-------|
| 1.80101E-05 | 298.867 | 707.3 |
|-------------|---------|-------|

/// 157693 /// 400728

|             |         |          |          |
|-------------|---------|----------|----------|
| 1.34122E-08 | 8370.95 | 4165.025 | -2.00982 |
|-------------|---------|----------|----------|

7.10663E-05 562.2 1879.28

55893

1.35089E-07 #DIV/0! 1953.525 #DIV/0! 3.41064E-07 515.85 5797.33  
9.29124E-08 #DIV/0! 2695.075 #DIV/0! 1.0342E-08 1018.4 7276.3

7.84128E-05 3588.1 7260.85 2.02359 4.20048E-05 3249 6830.2

7.46328E-06 2015.75 4336.48

1.32448E-07 1341.08 503.25

2.6383E-09 4665.03 1704.95 -2.73617 3.50399E-07 6901.13 3417.93

1.66588E-08 1232.23 380.925 -3.23482

2.64694E-06 1387.45 645.2333 -2.15031 0.00015212 2245.08 1056.08

1.11002E-07 2664.3 1280.55 -2.08059

0.00077517 15261.4 36541.1 2.39436 0.00334654 4148.98 18074.9

0.000112655 11256.4 31806

0.000123063 749.1 2154.55

0.000506051 497.2 1188.45

15

0.00252287 1080.37 #DIV/0! #DIV/0!

3.79064E-07 11713.5 4560.68

56

|             |         |          |          |             |         |         |
|-------------|---------|----------|----------|-------------|---------|---------|
|             |         |          |          | 0.00308908  | 289.9   | 904.575 |
|             |         |          |          | 1.52347E-08 | 1336.05 | 570.775 |
| 9.1654E-09  | 4203.78 | 9748.25  | 2.31893  | 1.44288E-11 | 3619.58 | 11534.6 |
| 0.000411085 | 3742.48 | 1850.775 | -2.02211 | 5.69985E-07 | 4711.28 | 1624.53 |
| 2.49109E-07 | #DIV/0! | 3575.5   | #DIV/0!  | 1.50054E-12 | #DIV/0! | 5382.4  |
|             |         |          |          | 0.00413904  | 2223.68 | 1044.75 |

7628 /// 654466

|             |         |         |          |             |         |         |
|-------------|---------|---------|----------|-------------|---------|---------|
| 2.74807E-06 | 1166.55 | 493.775 | -2.36251 | 0.000135167 | 1684.88 | 832.375 |
| 3.60034E-05 | 1262.03 | 506.1   | -2.49363 | 1.07043E-06 | 1464.93 | #DIV/0! |
| 8.56925E-05 | 1478.95 | 695.425 | -2.12669 | 0.000146872 | 2015.03 | 937.95  |

|             |         |          |          |             |         |         |
|-------------|---------|----------|----------|-------------|---------|---------|
| 4.28731E-05 | 16058.8 | 5387.775 | -2.9806  | 4.63618E-10 | 15355.9 | 2557.3  |
| 0.00106639  | 25345.6 | 8263.35  | -3.06723 | 1.87967E-08 | 27402.4 | 3825.18 |

1.46607E-08 1837.8 714.5 -2.57215

|             |         |          |         |             |         |         |
|-------------|---------|----------|---------|-------------|---------|---------|
| 3.07625E-10 | 2969.15 | 6953.125 | 2.34179 | 2.15353E-14 | 3339.48 | 11642.1 |
|             |         |          |         | 1.22839E-05 | 674.2   | 2616.2  |
| 3.90662E-08 | 3694.23 | 7878.55  | 2.13267 | 2.4564E-08  | 4796.43 | 10629.8 |
|             |         |          |         | 0.00170658  | #DIV/0! | 1701.48 |

2.34031E-05 1294.03 2898.9

0.000974556 10065.2 3867.775 -2.60233 4.20407E-05 11930.5 3806.15

0.00244827 1962.93 4036.6

0.00194471 446.6 991.325 2.21972 0.00173736 381.275 1117.18  
0.000054484 625.5 1436.43

6.76573E-08 13942.4 3021.08

1.37599E-05 1393.85 598.2

2.75717E-08 4264.53 10353.85 2.4279 5.36975E-08 4322.48 10698.7

0.000037899 2740.68 5771.525 2.10588 4.94644E-09 3368.48 10968.9  
3.8726E-08 3463.75 12251.3  
0.000147064 6745.75 13558.33 2.00991 3.14518E-07 8071.8 22068.5  
1.29979E-06 7156.93 14363.9 2.00699 1.47566E-10 7932.75 23691.3

/// 389177

0383 /// 284944

0.000205723 1208.78 413.967

1.03062E-05 3805.38 1662.83

/// 642477

140295 /// 728636

0.000374016 8000.5 3429.85 -2.33261

7.18408E-06 6518.83 2295.55

0.000127489 1095.63 439.5

0.00130782 1128.83 500.3333 -2.25615

0.000250606 6432.65 14056.25 2.18514

7.28797E-13 12593.4 40804.3

7.15829E-09 2172.93 8504.8

8.13572E-05 29618 59541.75 2.01032

8.87712E-11 9805.8 43550.2

2.77584E-06 3895.13 13708.8

0.00116261 1883.55 4445.48

0.000465011 267.825 757.5

0.000178903 #DIV/0! 1875.78

0.000487568 1360.38 3094.73

9.79915E-06 1533.18 3429.05

|             |         |          |         |             |         |         |
|-------------|---------|----------|---------|-------------|---------|---------|
| 9.33574E-06 | 4040.88 | 14889.98 | 3.68484 | 2.6204E-07  | 3046.55 | 15324.8 |
| 5.5674E-07  | 2073.35 | 9897.975 | 4.7739  | 2.71064E-08 | 1505.58 | 10160.1 |
| 1.87125E-05 | 17409.9 | 41285.48 | 2.37138 | 8.10451E-05 | 15689   | 35026.2 |
| 0.000531601 | 6586.35 | 34368.43 | 5.21813 | 0.000108034 | 4335.68 | 29263.9 |

|             |         |           |          |
|-------------|---------|-----------|----------|
| 2.39977E-06 | 8061.63 | 3950.9    | -2.04045 |
| 3.99195E-06 | 25687   | 12381.275 | -2.07466 |

|             |        |         |
|-------------|--------|---------|
| 0.000258714 | 1196.7 | 499.667 |
|-------------|--------|---------|

|             |         |        |          |             |         |         |
|-------------|---------|--------|----------|-------------|---------|---------|
| 0.000174508 | 6277.58 | 735.7  | -8.53279 | 4.40529E-07 | 2303.03 | 867.675 |
| 8.8302E-09  | 2046.23 | 584.95 | -3.49812 |             |         |         |

|             |     |        |
|-------------|-----|--------|
| 0.000365181 | 629 | 2542.4 |
|-------------|-----|--------|

|            |       |         |
|------------|-------|---------|
| 0.00211907 | 575.5 | 2041.23 |
|------------|-------|---------|

|             |         |        |          |             |         |         |
|-------------|---------|--------|----------|-------------|---------|---------|
| 4.14429E-06 | 14944.1 | 6188.7 | -2.41473 | 2.30998E-07 | 20738.8 | 7631.9  |
| 5.19157E-07 | 15124.1 | 4704.6 | -3.21475 | 3.79107E-06 | 19947.4 | 7685.95 |
|             |         |        |          | 3.13393E-08 | 33572   | 15308.3 |

7.35676E-07 31806 15826.08 -2.00972

0.000073053 39048.1 107309.9 2.74815 1.10423E-08 13423.8 82147.6

9.89032E-08 6577.13 2852.325 -2.30588 1.16567E-11 9348.38 2664.88  
4.53547E-06 2655.1 1221.95  
8.40539E-06 3051.98 1165.1 -2.6195

3766

0.000763598 1237.05 #DIV/0! #DIV/0! 0.000106318 974.45 407

6.65674E-06 8932.33 23347.38 2.61381 2.56089E-09 7464.4 33932.1  
3.9973E-07 16762 43021.98 2.56664 7.27653E-10 14225.9 51041.1  
5.53776E-08 6350.63 20609.2 3.24522 1.12257E-11 5516.93 30987.1  
1.23786E-05 1171.58 4710.9

0.000219365 2500.43 5554.6

0.000512601 855.25 #DIV/0!

4.48937E-05 1581.48 712.075  
0.000451252 857.9 382.3

0.00333591 41996.2 90396.4  
0.00398479 41256 91080.9  
0.000419597 35916.2 93055.8



/// 2621

30

5.10544E-11 6911.23 21639.13 3.13101 2.13798E-18 4465.6 36956.4

0.00164863 14589.7 5977.25

3.8843E-07 23626.8 11227.5

3.34058E-05 852 242.95

0.000973708 4487.53 1345.73

1.38229E-06 2061.4 393.475

31488

31488

0107

0.00357211 537.3 1428.93

0.000299653 820.2 1778.05

79 /// 728226 /// 728441 /// 91227

|             |         |          |          |             |         |         |
|-------------|---------|----------|----------|-------------|---------|---------|
| 1.64265E-05 | 1874.45 | 504.375  | -3.71638 | 5.54867E-06 | 2255.93 | 607.725 |
| 0.000132533 | 7115.58 | 2156.625 | -3.2994  | 0.000125088 | 7926.75 | 2332.98 |

|             |         |        |         |             |         |     |
|-------------|---------|--------|---------|-------------|---------|-----|
| 0.000125701 | #DIV/0! | 1125.5 | #DIV/0! | 1.93073E-08 | #DIV/0! | 827 |
|-------------|---------|--------|---------|-------------|---------|-----|

79008  
548593 /// 6818 /// 79008

13

|            |         |         |         |
|------------|---------|---------|---------|
| 0.00177018 | 1514.13 | 747.275 | -2.0262 |
|------------|---------|---------|---------|

|             |         |        |
|-------------|---------|--------|
| 6.28716E-09 | 5013.48 | 2058.2 |
|-------------|---------|--------|

|             |         |         |
|-------------|---------|---------|
| 0.000308905 | 795.567 | #DIV/0! |
|-------------|---------|---------|

|            |         |          |          |
|------------|---------|----------|----------|
| 0.00031331 | 19021.1 | 9464.675 | -2.00969 |
|------------|---------|----------|----------|

|             |         |         |
|-------------|---------|---------|
| 2.47465E-13 | 9629.35 | 2666.35 |
|-------------|---------|---------|

|             |         |        |
|-------------|---------|--------|
| 3.49347E-06 | 24554.2 | 8799.9 |
|-------------|---------|--------|

|             |         |         |
|-------------|---------|---------|
| 2.48113E-08 | 9906.98 | 2829.58 |
|-------------|---------|---------|

|             |         |         |
|-------------|---------|---------|
| 1.55746E-07 | 18453.7 | 6363.15 |
|-------------|---------|---------|

|             |         |        |
|-------------|---------|--------|
| 3.26338E-05 | 15536.7 | 3689.2 |
|-------------|---------|--------|

|             |         |        |         |
|-------------|---------|--------|---------|
| 8.88195E-05 | 2084.75 | 994.35 | -2.0966 |
|-------------|---------|--------|---------|

|             |        |         |
|-------------|--------|---------|
| 8.52744E-05 | 2128.1 | 1037.97 |
|-------------|--------|---------|

|             |        |        |
|-------------|--------|--------|
| 1.63336E-05 | 1502.6 | 572.35 |
|-------------|--------|--------|

|             |         |        |
|-------------|---------|--------|
| 8.57787E-07 | 1171.25 | 539.45 |
|-------------|---------|--------|

0.000728618 1006.25 486.95

36724

1.77259E-08 4582.58 21500.15 4.69172

1.77171E-10 2346.2 17115.2

1.12372E-05 2436.7 875.525  
0.00020721 3559.1 1710.05

0.000138941 10800.3 5024.825 -2.14939

1.34409E-06 13261.9 4813.55

0.00305672 12576.6 28132.8

0.000427394 1666.7 603.133

40270

0.000252605 715.125 271.767

|             |        |         |          |             |        |         |
|-------------|--------|---------|----------|-------------|--------|---------|
| 0.00143487  | 629.25 | 296.175 | -2.12459 | 9.79406E-05 | 968.35 | 359.7   |
| 9.29795E-07 | 1947.2 | 5669    | 2.91136  | 5.74627E-05 | 2430.6 | 5555.35 |

|            |        |        |
|------------|--------|--------|
| 2.4214E-08 | 613.55 | 1564.5 |
|------------|--------|--------|

/// 2821

|             |         |          |         |             |         |         |
|-------------|---------|----------|---------|-------------|---------|---------|
| 2.68695E-11 | 1716.13 | 10582.35 | 6.16642 | 4.18721E-17 | 1590.43 | 28902.5 |
|-------------|---------|----------|---------|-------------|---------|---------|

|            |       |         |
|------------|-------|---------|
| 0.00399459 | 201.4 | 1590.27 |
|------------|-------|---------|

|             |         |          |         |             |         |       |
|-------------|---------|----------|---------|-------------|---------|-------|
| 1.41924E-07 | 25302.3 | 67085.03 | 2.65134 | 3.19379E-07 | 29879.1 | 75408 |
|-------------|---------|----------|---------|-------------|---------|-------|

|             |         |          |          |             |         |         |
|-------------|---------|----------|----------|-------------|---------|---------|
| 1.08822E-05 | #DIV/0! | 734.8    | #DIV/0!  | 8.26026E-07 | 1511.78 | 317.025 |
| 7.37838E-08 | 1297.6  | 258.2667 | -5.02426 | 5.10496E-07 | 1092.1  | 227.5   |
| 2.25648E-06 | 807.775 | 187.5667 | -4.3066  |             |         |         |

|             |         |         |
|-------------|---------|---------|
| 0.000206829 | 991.233 | #DIV/0! |
|-------------|---------|---------|

|             |         |         |         |            |        |         |
|-------------|---------|---------|---------|------------|--------|---------|
| 2.55805E-05 | 4386.55 | 758.6   |         |            |        |         |
| 9.84618E-05 | 4190.63 | 761.125 |         |            |        |         |
| 0.00205341  | 580.375 | 1333.8  | 2.29817 | 0.0017875  | 405.1  | 1079.6  |
|             |         |         |         | 0.00419219 | 627.05 | #DIV/0! |

|            |         |         |          |             |         |        |
|------------|---------|---------|----------|-------------|---------|--------|
| 0.00018244 | 1391    | 275     | -5.05818 | 3.37826E-06 | 1282.63 | 268.35 |
| 0.0015688  | #DIV/0! | 1162.75 | #DIV/0!  |             |         |        |

|             |        |        |          |             |        |        |
|-------------|--------|--------|----------|-------------|--------|--------|
| 6.04715E-06 | 2080.9 | 803.05 | -2.59125 | 5.52246E-06 | 3161.8 | 1407.1 |
|-------------|--------|--------|----------|-------------|--------|--------|

|             |         |          |         |             |         |         |
|-------------|---------|----------|---------|-------------|---------|---------|
| 0.000138457 | 703.175 | #DIV/0!  |         |             |         |         |
| 0.00109435  | 510.375 | #DIV/0!  |         |             |         |         |
| 0.000454993 | 3151.3  | 16683.65 | 5.29421 | 3.60336E-05 | 1058.77 | 6724.15 |

53519 /// 728932  
53519 /// 728932  
53519 /// 728932

374

|             |         |         |         |             |         |         |
|-------------|---------|---------|---------|-------------|---------|---------|
| 5.92801E-07 | 685.525 | #DIV/0! | #DIV/0! | 2.76261E-05 | 1200.85 | #DIV/0! |
|             |         |         |         | 5.67373E-05 | 615.967 | #DIV/0! |

|             |         |          |          |             |         |         |
|-------------|---------|----------|----------|-------------|---------|---------|
| 3.15692E-11 | 4125.55 | 13234.93 | 3.20804  | 4.68059E-10 | 3389.28 | 9489.93 |
| 6.81226E-07 | 2280.18 | 6680.35  | 2.92975  | 0.000891679 | 1707.85 | 3479.9  |
| 8.29643E-07 | 2968.7  | 1201.45  | -2.47093 | 7.98942E-09 | 4061.15 | 1275.9  |

|             |         |       |
|-------------|---------|-------|
| 0.000652512 | #DIV/0! | 880.8 |
|-------------|---------|-------|

|             |         |         |
|-------------|---------|---------|
| 1.32056E-05 | 1953.08 | 13977.9 |
|-------------|---------|---------|

|             |         |         |
|-------------|---------|---------|
| 9.57728E-07 | 1838.58 | 4303.95 |
|-------------|---------|---------|

|            |         |          |         |
|------------|---------|----------|---------|
| 5.4986E-07 | 2956.15 | 6116.175 | 2.06897 |
|------------|---------|----------|---------|

|             |         |        |         |             |       |         |
|-------------|---------|--------|---------|-------------|-------|---------|
| 4.11119E-07 | 954.667 | 2467.1 | 2.58425 | 5.30723E-08 | 968.6 | 2641.18 |
|-------------|---------|--------|---------|-------------|-------|---------|

|             |         |       |
|-------------|---------|-------|
| 3.41482E-08 | 2219.43 | 928.5 |
|-------------|---------|-------|

/// 2969 /// 2970

|             |         |          |          |             |         |         |
|-------------|---------|----------|----------|-------------|---------|---------|
| 7.49723E-06 | 3126.3  | 1382.425 | -2.26146 | 0.000100299 | 34785.6 | 17292.8 |
| 0.00140959  | 2803.38 | 1364.975 | -2.05379 | 4.7452E-06  | 3899.25 | 1903.25 |
|             |         |          |          | 0.000110711 | 3481.25 | 1718.03 |
| 3.17244E-07 | 7978.7  | 18498.73 | 2.31851  | 3.41187E-06 | 5973.6  | 12823.6 |

1.43719E-05 10610 21823.95 2.05692 4.53036E-08 8269.45 23518.7

/// 100134401 /// 653188

1.15112E-10 625.5 2307.35 3.68881 6.15294E-05 #DIV/0! 1534.2  
2.93589E-05 4109.98 10810.78 2.63037 1.83761E-11 653.2 2740.1  
0.000323215 362.775 1077.175 2.96926 7.52357E-08 3135.03 12554.8

2.81109E-10 10106.5 4948.35  
1.87763E-08 3095.28 1457.4

21  
21  
21  
21

8.78724E-07 5908.18 2920.3

7.09744E-15 10828.2 51463.48 4.75274 1.92589E-12 13275.8 47047.8  
/// 144983 /// 3178 /// 391670 /// 402112 /// 440125 /// 642817 /// 643033 /// 644037 /// 645001 /// 664709 /// 664721 /// 728170 /// 728732 /// 728733  
/// 120364 /// 144983 /// 3178 /// 391670 /// 402112 /// 440125 /// 642817 /// 643033 /// 644037 /// 645001 /// 664709 /// 728170 /// 728643 /// 728732

0.000254582 1504.45 3457.975 2.2985  
6.73798E-07 6873.83 2429 -2.8299 1.22196E-05 7395.93 3307.78

0.000321502 910.9 445.7 -2.04375  
0.000174675 1087.73 473.1 -2.29914  
6.57606E-09 9755.48 4658.9  
0.000126335 1448.7 2960.55  
0.00415896 #DIV/0! 1406.6

|             |         |          |          |             |         |          |          |
|-------------|---------|----------|----------|-------------|---------|----------|----------|
| 1.77141E-11 | 3787.95 | 1159.325 | -3.26738 | 8.51627E-09 | 6507.65 | 2731.15  |          |
| 7.03518E-12 | 2189.25 | 604.1    | -3.62399 | 3.73651E-09 | 4903.33 | 1697.83  |          |
|             |         |          |          | 5.16785E-05 | 1629.7  | 729.4    |          |
| 4.15632E-06 | 1470.25 | 726.775  | -2.02298 | 6.58164E-06 | 1001.43 | 486      |          |
|             |         |          |          | 1.32276E-06 | 855.75  | 361.075  |          |
| 4.50906E-05 | 609.175 | 284.05   | -2.1446  |             |         |          |          |
|             |         |          |          | 0.00184359  | 1140.08 | 2318.93  |          |
| 2.3706E-06  | 4182.5  | 1714.3   | -2.43977 | 1.82241E-10 | 9914.55 | 2436.6   | -4.06901 |
| 1.19422E-06 | 6970.25 | 1934.25  | -3.60359 | 2.76739E-08 | 11700.7 | 2634.5   | -4.44133 |
|             |         |          |          | 6.05845E-13 | 8751.03 | 1513.35  |          |
|             |         |          |          | 9.69887E-11 | 11457.8 | 1569.2   |          |
| 6.345E-09   | 797.5   | 25160.8  | 31.5496  | 3.06995E-10 | 621.9   | 46399.65 | 74.6095  |
| 8.78695E-17 | 485.125 | 24859.7  | 51.2439  | 2.20785E-18 | 572.767 | 48841.9  | 85.2736  |
|             |         |          |          | 2.45762E-11 | #DIV/0! | 66156.9  |          |
|             |         |          |          | 3.18059E-19 | 477.467 | 58214.3  |          |
|             |         |          |          | 6.04416E-05 | 16002.9 | 7148.13  |          |
|             |         |          |          | 0.000262791 | 15852.7 | 7812.13  |          |
| 2.32418E-07 | 5185.93 | 2207     | -2.34976 | 5.99775E-06 | 6407    | 2999.98  |          |
| 0.00224511  | 2774.6  | 1274.8   | -2.1765  | 1.80182E-05 | 6030.88 | 1555.95  |          |

43 /// 8344 /// 8346 /// 8347

43 /// 8344 /// 8346 /// 8347

0.0018863 2443.4 1053.6 -2.3191

554313 /// 8294 /// 8359 /// 8360 /// 8361 /// 8362 /// 8363 /// 8364 /// 8365 /// 8366 /// 8367 /// 8368 /// 8370

554313 /// 8294 /// 8359 /// 8360 /// 8361 /// 8362 /// 8363 /// 8364 /// 8365 /// 8366 /// 8367 /// 8368 /// 8370

3337

3337

3.87269E-07 6940.45 19948.475 2.87423 1.29486E-14 4898.9 45342.48 9.25564 3.39493E-14 5105.33 45857.6

/// 100133583 /// 100133661 /// 100133811 /// 3119 /// 3120 /// 3123 /// 3124 /// 3125 /// 3126 /// 3127 /// 388567 /// 6036 /// 730415 /// 731247

2.23741E-06 3196.38 1089.2

0.00248995 4326.83 9948.03

3.26297E-07 2730.85 1062.5

1.8888E-06 980 #DIV/0!



1.72018E-05 1625.63 3475.23  
1.67598E-05 4154.1 2040.48

3204

2.60346E-08 848.025 1703.85

23

50  
50

8.09361E-07 5174.93 28299.3  
1.72615E-06 18820 59810.1  
0.0025039 988.4 139  
0.00222348 1506.05 #DIV/0!  
0.00341244 976.025 163.9  
4.3892E-07 1317.63 3449.2

4.88649E-05 2659.2 6109.925 2.29766 1.05655E-06 2005.08 5656.38

0.000379838 550.4 196.4 -2.80244

9.31711E-10 3087.1 13586.5

36614

0.00146826 4646.33 13894.6

J4  
J4  
J4

5.98675E-05 16606.5 6695.4  
2.69004E-05 6808.53 2080.03

0.000146284 12966.9 26801.3

5.40878E-07 12714.1 5570.35 -2.28246 1.898E-09 9534.55 3210.48  
6.20225E-07 10730.9 4659.4 -2.30306 5.55633E-09 7808.88 2836.03  
8.00745E-07 13365.9 6125.05 -2.18216 1.20405E-08 9793.5 3737.33  
8.39045E-07 9399.65 3909.7 -2.40419 3.95291E-08 7618.05 2720.05  
3.66878E-05 11614.4 4392.525 -2.64412

|             |         |         |          |             |         |         |
|-------------|---------|---------|----------|-------------|---------|---------|
| 3.63351E-06 | 5242.83 | 2301.35 | -2.27815 | 2.70982E-09 | 3046.45 | 1068.83 |
|             |         |         |          | 9.41387E-09 | 7101.93 | 2273.18 |

|            |         |          |          |             |         |         |
|------------|---------|----------|----------|-------------|---------|---------|
| 5.6237E-06 | 16970.2 | 7841.025 | -2.16428 | 4.64362E-08 | 1547.38 | 634.675 |
|            |         |          |          | 1.4582E-07  | 18766.4 | 7393.48 |

|  |  |  |  |             |         |         |
|--|--|--|--|-------------|---------|---------|
|  |  |  |  | 1.37342E-07 | 2834.83 | 1175.53 |
|--|--|--|--|-------------|---------|---------|

|             |         |        |         |             |         |         |
|-------------|---------|--------|---------|-------------|---------|---------|
| 1.19633E-05 | 9121.43 | 4081.9 | -2.2346 | 2.10766E-05 | 11860.8 | 5206.23 |
|-------------|---------|--------|---------|-------------|---------|---------|

|             |         |          |         |            |        |       |
|-------------|---------|----------|---------|------------|--------|-------|
| 2.23427E-07 | 5500.48 | 18780.33 | 3.41431 | 7.4639E-08 | 5154.7 | 18494 |
|-------------|---------|----------|---------|------------|--------|-------|

|             |         |          |         |             |         |         |
|-------------|---------|----------|---------|-------------|---------|---------|
| 1.67405E-08 | 11323.4 | 36905.03 | 3.25918 | 2.05283E-09 | 8835.13 | 33447.6 |
|-------------|---------|----------|---------|-------------|---------|---------|

|             |         |          |         |             |        |        |
|-------------|---------|----------|---------|-------------|--------|--------|
| 1.05912E-06 | 2461.98 | 7519.225 | 3.05414 | 4.42836E-07 | 2085.1 | 6517.4 |
|-------------|---------|----------|---------|-------------|--------|--------|

099

|  |  |  |  |             |       |         |
|--|--|--|--|-------------|-------|---------|
|  |  |  |  | 0.000379438 | 17160 | 6707.45 |
|--|--|--|--|-------------|-------|---------|

|             |         |        |          |  |  |  |
|-------------|---------|--------|----------|--|--|--|
| 2.31783E-06 | 1732.13 | 790.85 | -2.19021 |  |  |  |
|-------------|---------|--------|----------|--|--|--|

5.98838E-05 45378 97407.48 2.14658 3.04093E-05 36374.6 80829.5

2.86676E-05 12837.7 5432.175 -2.36327

302  
302

535 /// 3538

7.89502E-06 1060.88 252.6

1.10392E-06 617.375 225.15 -2.74206  
0.000384914 1126.83 520.7 -2.16406

0.000338855 6873.68 3311.7  
1.65372E-08 1092.28 257.45  
1.88601E-06 1560.3 547.733

1.06258E-05 10646.5 4604.2 -2.31233  
1.44165E-05 14797.2 7203.25 -2.05423  
6.18915E-05 15537.6 7693.7 -2.01952

2.36109E-05 7912.58 2831.88

0.000128614 2905.45 18523.525 6.37544  
0.000123939 40655.7 87341.25 2.14832

0.0012066 3496.55 10198.53 2.91674  
0.00188844 455.475 974.3 2.13909  
1.02917E-09 18875.6 56134.1 2.97389  
3.31498E-09 20504.9 66876.2 3.26147

3.37028E-08 2327.45 19078.5  
8.52441E-05 555.725 1640.73  
9.15534E-08 484.667 4290.15  
2.69262E-07 8655.2 21057.3  
5.35178E-07 9513.6 26266.2

2.9147E-06 9847.85 23646.7 2.4012

5.09585E-05 12056.8 24183.3  
0.000117046 1191.6 2493.23  
0.000406076 612.825 2764.08

0.000116461 15667.1 46772.8

|             |         |          |          |             |         |         |
|-------------|---------|----------|----------|-------------|---------|---------|
| 1.14969E-08 | 6271.08 | 1266.725 | -4.95062 | 1.71894E-11 | 14734.6 | 1921.23 |
|             |         |          |          | 7.05539E-08 | 568.325 | 163.65  |
| 0.000284885 | 365.15  | 802.95   | 2.19896  |             |         |         |

|             |        |        |  |  |  |  |
|-------------|--------|--------|--|--|--|--|
| 1.07408E-07 | 3058.3 | 6750.3 |  |  |  |  |
|-------------|--------|--------|--|--|--|--|

34289

|             |         |         |         |  |  |  |
|-------------|---------|---------|---------|--|--|--|
| 2.82352E-05 | 1051.37 | #DIV/0! | #DIV/0! |  |  |  |
|-------------|---------|---------|---------|--|--|--|

|             |       |          |         |            |         |         |
|-------------|-------|----------|---------|------------|---------|---------|
| 0.000155257 | 12878 | 27628.03 | 2.14537 | 0.00165739 | 1595.48 | 4615.35 |
|-------------|-------|----------|---------|------------|---------|---------|

|            |        |       |  |  |  |  |
|------------|--------|-------|--|--|--|--|
| 0.00315746 | 667.75 | 315.7 |  |  |  |  |
|------------|--------|-------|--|--|--|--|

|             |         |         |  |  |  |  |
|-------------|---------|---------|--|--|--|--|
| 2.43127E-07 | 3334.73 | 1129.65 |  |  |  |  |
|-------------|---------|---------|--|--|--|--|

4538 /// 4670 /// 55827  
4538 /// 55827

|            |         |         |  |  |  |  |
|------------|---------|---------|--|--|--|--|
| 0.00324759 | 8953.53 | 24720.2 |  |  |  |  |
|------------|---------|---------|--|--|--|--|

|             |         |          |         |             |         |         |
|-------------|---------|----------|---------|-------------|---------|---------|
| 3.10425E-06 | 10846.8 | 34195.85 | 3.15262 | 3.12445E-08 | 5119.73 | 23252   |
|             |         |          |         | 0.00161577  | 507.3   | 2108.63 |
|             |         |          |         | 0.000014634 | 2844.05 | 12650.2 |

|             |             |           |          |             |             |          |         |
|-------------|-------------|-----------|----------|-------------|-------------|----------|---------|
|             | 0.000164772 | 1841.53   | 4365.475 | 2.37058     | 1.99294E-07 | 1088.73  | 4168.65 |
|             |             |           |          |             | 0.000212362 | 1229.65  | 482.867 |
|             | 6.62353E-11 | 7208.75   | 20773.2  | 2.88166     | 1.42427E-08 | 8102.83  | 18233.4 |
|             | 3.55577E-08 | 6513.5    | 20515.03 | 3.14962     | 1.05978E-05 | 8880.65  | 22104.2 |
| 6.64201E-08 | 9464.33     | 20010.575 | 2.11432  | 1.62901E-11 | 6277.45     | 17967.08 | 2.86216 |
|             |             |           |          |             | 1.35082E-11 | 5492.73  | 14866   |
|             |             |           |          |             | 5.21722E-07 | 18671.3  | 8586.25 |

5072

0.000197043 3279.28 1617.23

57461

0.0036241 1416.9 577.25

0.000659991 724.7 309.575

0.00210556 265.9 612.65

|             |         |           |         |             |       |          |         |             |         |         |
|-------------|---------|-----------|---------|-------------|-------|----------|---------|-------------|---------|---------|
|             |         |           |         |             |       |          |         | 4.77368E-08 | 3975.55 | 12642.8 |
| 5.80557E-07 | 13294.1 | 31580.825 | 2.37556 | 6.70761E-10 | 17316 | 58651.08 | 3.38711 | 1.95807E-08 | 22347.2 | 62586.9 |

|             |         |         |
|-------------|---------|---------|
| 0.000879674 | 5036.73 | 10975.8 |
| 5.55013E-05 | 14829.8 | 33218.2 |

|             |         |         |         |             |         |         |
|-------------|---------|---------|---------|-------------|---------|---------|
|             |         |         |         | 3.55991E-06 | 781     | 2648.53 |
| 4.22958E-05 | #DIV/0! | 637.625 | #DIV/0! | 0.000350395 | #DIV/0! | 825.775 |
| 0.000248739 | 322.267 | 683.475 | 2.12084 | 4.11441E-06 | 267.167 | 929.225 |
| 5.14892E-07 | #DIV/0! | 821     | #DIV/0! | 0.000253826 | #DIV/0! | 858.025 |

|             |         |         |       |             |         |          |         |             |         |         |
|-------------|---------|---------|-------|-------------|---------|----------|---------|-------------|---------|---------|
| 0.000168192 | 8455.28 | 17037.4 | 2.015 | 1.93333E-06 | 4165.35 | 10654.43 | 2.55787 | 2.1227E-07  | 2934.6  | 9095.23 |
|             |         |         |       | 5.49761E-06 | 13928.4 | 28029.7  | 2.01241 | 1.1453E-07  | 9525.3  | 23480.4 |
|             |         |         |       | 0.00100712  | 1535.33 | 3089.05  | 2.01198 |             |         |         |
|             |         |         |       | 0.00131072  | 607.4   | 1706.075 | 2.80882 | 0.000147114 | 610.775 | 2008.68 |
|             |         |         |       |             |         |          |         | 0.00048127  | 12473.7 | 27355.5 |

|             |        |         |          |
|-------------|--------|---------|----------|
| 9.87214E-05 | 590.95 | 261.925 | -2.25618 |
|-------------|--------|---------|----------|

|            |         |         |
|------------|---------|---------|
| 0.00298726 | 1801.08 | 3961.23 |
|------------|---------|---------|

|             |         |         |          |
|-------------|---------|---------|----------|
| 6.16657E-05 | 5974.63 | 2566.8  | -2.32766 |
| 7.82062E-06 | 4878.53 | 1891.05 | -2.5798  |

/// 3772

|            |         |         |
|------------|---------|---------|
| 0.00001189 | 10521.6 | 25027.7 |
|------------|---------|---------|

1.53624E-05 2047.9 640

0.0011591 #DIV/0! 732.45 #DIV/0!  
4.66137E-05 17990.7 6875.475 -2.61665  
1.77382E-05 10072.8 3711.05 -2.71426

4.64646E-06 20606.6 6998.3  
2.17123E-06 12233 4326.08

3.48815E-07 3224.73 1476.15

0.000477731 784.425 #DIV/0!

0.0018527 2249.13 969.1 -2.32084

4.63011E-05 773.375 218.967  
1.51958E-07 1566.08 334.1

1.51465E-05 971.475 424.6

5.95477E-07 3391.53 1544.3

4.80046E-05 724.233 264 -2.74331

0.00258187 567.4 165.9

47735

0.000147915 2186.03 #DIV/0! #DIV/0!

2.20768E-07 1974.43 830.125

/// 149013 /// 200030 /// 25832 /// 284565 /// 400818 /// 440670 /// 55672 /// 728841 /// 728912 /// 728936 /// 84224  
/// 149013 /// 200030 /// 25832 /// 284565 /// 400818 /// 440670 /// 55672 /// 728841 /// 728912 /// 728936 /// 84224  
/// 149013 /// 200030 /// 25832 /// 284565 /// 400818 /// 440670 /// 55672 /// 728841 /// 728912 /// 728936

9.43318E-05 21209.2 9854.675 -2.15219

7.83572E-06 6577.18 2896.28



|             |       |           |         |             |         |          |          |  |             |         |         |
|-------------|-------|-----------|---------|-------------|---------|----------|----------|--|-------------|---------|---------|
|             |       |           |         | 0.000205115 | 473.575 | 959.15   | 2.02534  |  | 2.88693E-08 | 705.3   | 2163.8  |
|             |       |           |         | 2.59588E-05 | 1042.68 | 486.4    | -2.14366 |  | 6.85174E-06 | 600.825 | 1835.33 |
|             |       |           |         |             |         |          |          |  | 6.63123E-07 | 2906.35 | 1318.45 |
| 0.000036802 | 831.8 | 392.26667 | -2.1205 | 0.00031215  | 1136.38 | 546.975  | -2.07756 |  |             |         |         |
|             |       |           |         |             |         |          |          |  | 1.1248E-06  | 8782.43 | 3623.43 |
|             |       |           |         |             |         |          |          |  | 3.08084E-06 | 4895.23 | 2132.83 |
|             |       |           |         |             |         |          |          |  | 8.05627E-06 | 2920.98 | 1055.33 |
|             |       |           |         |             |         |          |          |  | 0.000267296 | 1109.15 | 2434.4  |
|             |       |           |         |             |         |          |          |  | 1.57938E-10 | 3249.5  | 490.45  |
|             |       |           |         | 1.83911E-11 | 3627.88 | 28978.05 | 7.98761  |  | 2.76507E-14 | 1617.05 | 25282.5 |
|             |       |           |         |             |         |          |          |  | 9.94447E-10 | 14988.5 | 4790.5  |
|             |       |           |         |             |         |          |          |  | 0.00034389  | 1637.48 | 626.667 |

1.06121E-06 1727.93 622.55 -2.77556

0.000467924 790.9 329.425

6.06705E-08 1701.45 748.625 -2.27277

4.73384E-09 2211.48 864.05

22

302

3860

3860

9.7025E-07 4482.65 2018.53

2.47263E-08 17010.6 7904.5

0.000194107 3052.18 1108.7

0.0042622 624.075 #DIV/0!

7335

9.44245E-05 380.3 950.9

0.000283317 6430.55 24385.78 3.79218

3.18687E-07 1022.35 8570.65

|             |         |           |         |             |         |          |          |  |             |         |         |
|-------------|---------|-----------|---------|-------------|---------|----------|----------|--|-------------|---------|---------|
|             |         |           |         |             |         |          |          |  | 0.00196259  | 628.8   | 1385.48 |
|             |         |           |         |             |         |          |          |  | 1.44276E-07 | 14398.8 | 6017.13 |
|             |         |           |         |             |         |          |          |  |             |         |         |
|             |         |           |         |             |         |          |          |  | 1.62539E-06 | 1518.1  | 662.2   |
|             |         |           |         |             |         |          |          |  |             |         |         |
|             |         |           |         | 0.000135056 | 6123.18 | 12885.2  | 2.10433  |  | 0.000105692 | 4730.2  | 10129.6 |
|             |         |           |         |             |         |          |          |  | 1.04807E-05 | 3349.33 | 9732.1  |
|             |         |           |         |             |         |          |          |  | 1.55035E-05 | 33416.2 | 67751.7 |
|             |         |           |         |             |         |          |          |  | 3.49915E-09 | 844.9   | 2595.48 |
| 0.0002036   | 25192.6 | 78741.825 | 3.12559 | 8.21845E-06 | 26729.8 | 113200.2 | 4.23498  |  | 9.12891E-08 | 15063.1 | 96632   |
|             |         |           |         |             |         |          |          |  |             |         |         |
|             |         |           |         |             |         |          |          |  |             |         |         |
|             |         |           |         |             |         |          |          |  | 1.21403E-06 | 226.2   | 4190.73 |
|             |         |           |         |             |         |          |          |  |             |         |         |
|             |         |           |         |             |         |          |          |  |             |         |         |
|             |         |           |         |             |         |          |          |  | 0.00016419  | 24135.9 | 65138.2 |
| 3.86247E-10 | 1150.28 | 3377.925  | 2.93662 | 6.3316E-16  | 1649    | 9775.35  | 5.92805  |  | 4.36784E-15 | 2049.58 | 11499.7 |
| 4.02012E-09 | 1710.98 | 4188.85   | 2.44822 | 1.64728E-15 | 2015.75 | 10381.48 | 5.15018  |  | 2.91485E-18 | 2338.18 | 18371.1 |
| 8.21067E-08 | 840.525 | 2113.4    | 2.51438 | 9.62121E-14 | 1146.08 | 6156.125 | 5.37149  |  | 2.03133E-14 | 1288.28 | 7718.65 |
| 4.31751E-06 | 1843.53 | 4293.45   | 2.32894 | 1.09195E-13 | 1908.95 | 13214.8  | 6.92255  |  | 2.15328E-16 | 2281.33 | 25369.5 |
| 0.000001664 | 1208.43 | 2964.8    | 2.45344 | 4.652E-13   | 1230.33 | 8326.875 | 6.76803  |  | 2.04629E-15 | 1785.55 | 17453.8 |
|             |         |           |         | 5.30705E-10 | 285.825 | 1210.975 | 4.23677  |  | 2.71508E-05 | 442.775 | 973.4   |
|             |         |           |         |             |         |          |          |  |             |         |         |
|             |         |           |         |             |         |          |          |  |             |         |         |
|             |         |           |         | 1.06052E-05 | 740     | 4849.65  | 6.55358  |  | 2.98817E-09 | 442.8   | 5432.15 |
|             |         |           |         |             |         |          |          |  |             |         |         |
|             |         |           |         |             |         |          |          |  |             |         |         |
|             |         |           |         | 8.18466E-06 | 6477.38 | 1843.55  | -3.51353 |  | 1.21068E-07 | 11774.7 | 2580.2  |
|             |         |           |         | 6.45655E-05 | 1362.33 | 496.1333 | -2.74588 |  | 0.000173766 | 2636.43 | 667.775 |

1.78558E-06 5253.4 2465 -2.1312

1.24329E-07 3914.63 1608.425 -2.43383 0.00212098 253.4 532.3  
5.96242E-07 4212.48 1888.5

2.53283E-06 14862 31862.55 2.1439 8.81087E-05 4724.45 10426.1  
0.000185937 26467.7 55640.13 2.10219 2.39198E-09 9368.1 42038.7  
0.000146256 14390.5 30241.1 2.10146 2.16294E-08 6616.3 24811  
1.67289E-05 514.875 1974.925 3.83574 4.50755E-07 206.433 1371.03  
1.11401E-07 402.925 1428.825 3.54613 2.72776E-07 256.4 792.125  
0.000357278 882.875 2175.75 2.46439 2.14276E-06 519.15 2076.95

9.54838E-05 1143.78 416.9 -2.74352  
0.000516043 1653.75 825.025 -2.00448

2.82227E-05 4926.93 1773.7 -2.77777  
3.18196E-05 5425.18 2397.05 -2.26327

/// 9883  
/// 9883

3.05883E-10 2374.93 1081.55

131691 /// 202227 /// 256374 /// 342541 /// 391532 /// 402644 /// 439953 /// 440063 /// 5478 /// 643997 /// 654188

0.000872318 1336.15 649.5 -2.0572

7.37983E-09 3512.73 1398.725 -2.51138 3.60759E-09 4734.85 1694.43

084

5.18646E-05 2977.23 1340.325 -2.22127

0.000227853 464.65 1026.65 2.20951 3.39695E-06 827.675 2363.78

3.42236E-08 466.275 5364.875 11.5058 1.34499E-09 370.675 6030.9

5371

285596 /// 653316

255812 /// 727956

9.64665E-06 2580.33 1268.78

/// 23117 /// 283846 /// 348162 /// 440345 /// 440350 /// 641298 /// 642799 /// 729602 /// 729978 /// 730153

0866

5.76795E-05 256.125 1105.35 4.31567 5.14158E-06 236.1 1194.03

5.54604E-07 1604.95 718.5

0.000354114 619.8 #DIV/0! #DIV/0!

|             |         |          |         |             |         |        |
|-------------|---------|----------|---------|-------------|---------|--------|
| 9.89077E-06 | #DIV/0! | 1137.033 | #DIV/0! | 0.000438636 | 547.8   | 109.7  |
|             |         |          |         | 1.74287E-05 | #DIV/0! | 1766.8 |

285878

|             |         |          |          |
|-------------|---------|----------|----------|
| 6.14043E-05 | 3489.63 | 1541.125 | -2.26434 |
|-------------|---------|----------|----------|

|             |         |         |          |             |         |         |
|-------------|---------|---------|----------|-------------|---------|---------|
| 1.00974E-05 | 1609.58 | 701.15  | -2.29562 | 1.69828E-06 | 1664.35 | 728     |
| 3.68171E-05 | 1541.9  | 720.675 | -2.13952 | 0.000143827 | 2440.75 | 1140.83 |

41315 /// 5042 /// 652607

3921 /// 653162 /// 730029

|             |      |          |         |             |         |         |
|-------------|------|----------|---------|-------------|---------|---------|
|             |      |          |         | 1.57794E-07 | 4602.8  | 1372.15 |
|             |      |          |         | 9.74221E-05 | 2214.43 | 738.7   |
| 3.51316E-06 | 7256 | 3188.325 | -2.2758 | 2.18255E-06 | 10142.6 | 4684.5  |

/// 389831

/// 390183 /// 442162 /// 6191  
5142

402483 /// 55251 /// 642780 /// 643670 /// 728105 /// 728323 4.09542E-05 1634.1 808.95

|             |         |          |         |             |         |         |
|-------------|---------|----------|---------|-------------|---------|---------|
| 8.57989E-10 | 9230.65 | 19685.73 | 2.13265 | 7.69847E-14 | 1668.93 | 6910.05 |
| 1.31887E-06 | 9413.38 | 21094.7  | 2.24093 | 1.36573E-16 | 5366.18 | 21432.4 |
|             |         |          |         | 1.18852E-13 | 5611.75 | 29671.4 |

542361 9.65628E-06 1646.33 817.225  
/// 100133666 /// 440104

40345 /// 440354 /// 595101 /// 641298 /// 728423 /// 729513

4508

0.00222974 151.1 758 5.01655

0.000793724 654.2 1637.9 2.50367

0.000308792 672.65 265.4667 -2.53384 3.87184E-05 1220.03 287.025

1.43921E-06 3126 968.65

/// 100170646 /// 100187701 /// 643955 /// 90827

0.000425115 568.967 242.5

0.000170009 2527.38 1075.8 -2.3493 1.97522E-05 4166.25 1516.5 -2.74728 6.17432E-05 4610.48 1870.05

3287  
553192

0.000126994 781.45 371.725

5175

0.000540151 470.267 1062.23

/// 100142659 /// 441294

1.17106E-05 2659.38 1263.05 -2.10552 3.39592E-08 4966.55 1645.6  
0.00190478 1368.65 596.5 -2.29447 7.71358E-05 2799.08 883.05

/// 100130892 /// 100131085 /// 388401 /// 441896 /// 6129 /// 641900 /// 648000 /// 728380 /// 728843

6.03621E-07 4530.25 1562.88





4.51307E-07 2172.83 6165.18

3.35867E-06 785.7 383.125

/// 149013 /// 200030 /// 25832 /// 284565 /// 400818 /// 440670 /// 55672 /// 728841 /// 728912 /// 728936 /// 84224

06 /// 3135 /// 3136 /// 3137 /// 649853

728116

0432

0432

728

31602

06610

2.46369E-05 1086.65 480.7

7.90803E-05 #DIV/0! 1264.7 #DIV/0! 2.95712E-09 #DIV/0! 2344.325 #DIV/0! 1.55713E-06 644.05 3469.55

9.01868E-08 15174.7 6651.35 -2.28145 1.07217E-09 20350.7 7224.4  
1.77818E-06 7058.48 3316.33

1.14556E-05 19154.2 9246.5 -2.07151

2.08242E-09 7316.4 2041.58

0884

0.00189723 6007.85 2837.125 -2.11758

0.00248754 1131.7 2269.033 2.00498  
0.000228349 1864.9 902.075 -2.06734

0.0001948 #DIV/0! 1263.27

0.0013832 1024.3 427.5  
0.00217533 36871.3 17701.2

0.00246065 989.775 2309.33

0.00058876 #DIV/0! 1434.8 #DIV/0!

0.000387411 3626.68 1449.9 -2.50133

0.00207936 2935.15 1300.1

9.87996E-06 10201.8 2873.43

1.86994E-10 2580.7 843.05

0.000228667 1425.33 659.775 -2.16032

1.57047E-05 1906 815.1

4.98049E-05 #DIV/0! 1072.25

0.000024069 2410.43 1016.15

0.000155652 24462.1 59204.825 2.42027

1.14183E-06 2835.13 8012.65 2.8262  
1.13836E-05 13255.4 38863.73 2.93192

1.59976E-06 3072.38 9988.4  
9.26321E-07 13975.4 50339.5

|             |         |         |
|-------------|---------|---------|
| 3.83021E-07 | 2246.25 | 934.525 |
| 2.76592E-08 | 2924.98 | 1110.5  |
| 7.96799E-07 | 1701.43 | 592.725 |

|             |        |         |
|-------------|--------|---------|
| 6.75442E-08 | 2070.1 | 716.475 |
|-------------|--------|---------|

|             |         |          |        |             |         |       |
|-------------|---------|----------|--------|-------------|---------|-------|
| 1.02918E-07 | 10285.7 | 27408.33 | 2.6647 | 1.25245E-07 | 7230.65 | 19550 |
|-------------|---------|----------|--------|-------------|---------|-------|

|             |        |        |          |
|-------------|--------|--------|----------|
| 8.52239E-06 | 2458.8 | 1211.9 | -2.02888 |
|-------------|--------|--------|----------|

|             |         |          |          |             |         |         |
|-------------|---------|----------|----------|-------------|---------|---------|
| 1.94151E-05 | 3194.48 | 1458.475 | -2.19028 | 7.07467E-05 | 9822.1  | 4495.6  |
| 1.75222E-05 | 7144.1  | 2823.6   | -2.53014 | 1.97622E-09 | 5315.73 | 1900.83 |

|             |         |          |         |             |         |         |
|-------------|---------|----------|---------|-------------|---------|---------|
| 1.54619E-06 | 18323.2 | 49009.88 | 2.67474 | 5.14777E-05 | 12605.5 | 28044.4 |
| 0.000735582 | 2795.63 | 7593.625 | 2.71625 |             |         |         |

|             |         |       |          |             |         |         |
|-------------|---------|-------|----------|-------------|---------|---------|
|             |         |       |          | 3.29551E-05 | 7152.68 | 14550.9 |
|             |         |       |          | 6.00927E-06 | 3323.58 | 7203    |
|             |         |       |          | 1.52607E-07 | 10802.9 | 25131.6 |
| 1.20801E-05 | 1488.63 | 482.8 | -3.08332 | 1.22651E-06 | 1510.75 | #DIV/0! |

|             |         |          |         |             |         |         |
|-------------|---------|----------|---------|-------------|---------|---------|
| 3.71621E-07 | 5082.85 | 17161.65 | 3.37638 | 1.56697E-05 | 1646.38 | 763.833 |
| 9.57567E-07 | 377.95  | 1272.175 | 3.36599 | 5.21908E-10 | 3955.95 | 22740   |
| 0.000150336 | #DIV/0! | 889.9667 | #DIV/0! | 0.000275395 | 547.875 | 1386.18 |

|             |         |         |          |             |         |         |
|-------------|---------|---------|----------|-------------|---------|---------|
| 2.91814E-05 | 6884.18 | 3413.35 | -2.01684 | 2.90628E-07 | 11573.6 | 4874.73 |
|-------------|---------|---------|----------|-------------|---------|---------|

/// 375449

0.000137544 4049.35 1491.8 -2.71441  
0.000554582 27227.8 12975.45 -2.09841

1.46023E-07 2203.68 791.7

0.000492381 6068.18 2970.48

8.1715E-06 329.2 815.075

6.33874E-09 8645.63 2790.6 -3.09812  
5.96987E-10 13115.7 4718.675 -2.77952  
2.289E-07 5713.98 2055.925 -2.77927

/// 4207 /// 729991

|             |         |          |          |             |         |         |
|-------------|---------|----------|----------|-------------|---------|---------|
| 0.00109171  | 18927.9 | 7023.25  | -2.69503 | 3.69464E-05 | 21615.1 | 5449.9  |
| 0.000134177 | 5414.73 | 1895.375 | -2.85681 | 5.39004E-06 | 5798.23 | 1392.4  |
| 0.00214846  | 2392.6  | 1074.8   | -2.22609 | 2.02435E-05 | 3542.53 | 1046.15 |

9.33623E-08 1047.25 #DIV/0!

31602

|             |         |         |          |             |         |        |
|-------------|---------|---------|----------|-------------|---------|--------|
|             |         |         |          | 3.99386E-06 | 1521.53 | 702.2  |
| 0.000171096 | 475.375 | 1117.75 | 2.3513   | 3.12308E-08 | 347.45  | 1515.9 |
| 8.75562E-06 | 1166.7  | 399.25  | -2.92223 | 2.5889E-10  | 2474.73 | 467    |

|             |         |           |         |            |         |          |         |             |         |         |
|-------------|---------|-----------|---------|------------|---------|----------|---------|-------------|---------|---------|
| 1.29337E-12 | 5688.75 | 11970.775 | 2.10429 | 2.9867E-13 | 8203.75 | 17137.88 | 2.08903 | 4.60669E-05 | 2707.28 | 1311.45 |
|             |         |           |         |            |         |          |         | 5.89173E-16 | 5900.4  | 15462   |
|             |         |           |         |            |         |          |         | 0.00163313  | 1034.65 | 440.4   |

33552

|             |         |          |          |             |         |         |
|-------------|---------|----------|----------|-------------|---------|---------|
| 4.48374E-06 | 3536.15 | 1636.675 | -2.16057 |             |         |         |
| 0.000822878 | 808.3   | 1950.65  | 2.41327  | 4.13707E-05 | #DIV/0! | 1399.25 |

3972

|             |         |          |         |             |         |         |
|-------------|---------|----------|---------|-------------|---------|---------|
| 6.10972E-09 | 2744.85 | 8511.075 | 3.10074 | 0.000553745 | 15608.3 | 6399.43 |
|             |         |          |         | 5.31731E-08 | 6147.05 | 17508.3 |

6.6499E-06 2844.78 1249.38

0.000223114 2764.08 1285.75

|             |         |         |          |             |         |        |
|-------------|---------|---------|----------|-------------|---------|--------|
| 0.000161411 | 1195.28 | 369.025 | -3.23901 | 3.78339E-07 | 1696.28 | 318.05 |
|-------------|---------|---------|----------|-------------|---------|--------|

3794  
90585

|             |         |          |          |
|-------------|---------|----------|----------|
| 0.000020319 | 17430.6 | 7581.875 | -2.29898 |
|-------------|---------|----------|----------|

|             |         |          |          |             |         |         |
|-------------|---------|----------|----------|-------------|---------|---------|
| 1.74268E-06 | 853.175 | 274.7667 | -3.10509 | 4.44886E-07 | 1281.78 | 369.35  |
|             |         |          |          | 1.26797E-07 | 653.1   | 278.175 |

|             |         |         |
|-------------|---------|---------|
| 0.000516144 | 8190.28 | 3918.08 |
| 0.00332282  | 594.1   | 1378.1  |

|            |     |         |        |             |        |        |
|------------|-----|---------|--------|-------------|--------|--------|
| 0.00125057 | 838 | 2379.25 | 2.8392 | 3.42779E-06 | 671.95 | 3300.6 |
|------------|-----|---------|--------|-------------|--------|--------|

|             |         |        |          |             |         |         |
|-------------|---------|--------|----------|-------------|---------|---------|
| 1.84769E-05 | 1305.05 | 538.65 | -2.42282 | 1.74302E-05 | 715.225 | 274.725 |
|-------------|---------|--------|----------|-------------|---------|---------|

|             |         |          |          |             |         |         |
|-------------|---------|----------|----------|-------------|---------|---------|
| 9.46314E-05 | 2241.38 | 1117.5   | -2.0057  | 3.54513E-06 | 1913.25 | 709.95  |
| 0.00108697  | 4872.28 | 1999.775 | -2.43641 | 5.7513E-06  | 4270.63 | 1096.43 |

|             |      |         |         |             |         |         |         |             |         |         |
|-------------|------|---------|---------|-------------|---------|---------|---------|-------------|---------|---------|
| 3.03268E-09 | 2185 | 15581.3 | 7.13103 | 1.09873E-14 | 1541.78 | 42954.5 | 27.8604 | 1.85615E-16 | 1332.73 | 63943.1 |
|-------------|------|---------|---------|-------------|---------|---------|---------|-------------|---------|---------|

31671

|             |         |        |          |             |         |         |
|-------------|---------|--------|----------|-------------|---------|---------|
| 5.52689E-10 | 9074.18 | 3344.1 | -2.71349 | 1.37192E-08 | 7165.95 | 2930.18 |
|-------------|---------|--------|----------|-------------|---------|---------|





0.000257794 778.975 335.9

0.00167714 489.775 1465.43

1.92451E-05 415.45 2118.33

3.96986E-07 14563.1 30399.25 2.08742

6.31845E-09 12160.8 30361.8

0.00401378 45212 18745.9

0.00433991 48767.4 20649.7

3.4688E-07 6971.58 2247.85 -3.10144

1.0954E-08 13695.1 3735.1

7.34636E-09 8221.58 2677.1 -3.07108

1.82576E-10 16179.5 4475.53

6.89157E-07 4296.33 #DIV/0! #DIV/0!

2.6859E-08 8201.08 2427.33

0.000011851 1359.88 442.9 -3.07039

0.00039933 1012.78 424.4

2.11984E-05 9386.18 4479.425 -2.0954

0.00183829 1556.6 #DIV/0!

42393

1.41164E-06 4440.18 1840.73

0.00289877 573.3 #DIV/0!

0.00100059 580.375 227.5

54460

0.000411285 1412.4 623.167

3.70644E-06 1275.2 579.4 -2.2009

1.12193E-06 1563.83 631.6

7.8094E-07 6223.85 3000.55 -2.07424

0.000452113 921.7 387.233

485

/// 4515

0.00265503 248.75 594.85

8.56571E-05 856.125 306.375 -2.79437

1.12572E-05 1016.2 300.175

0.000013534 918.125 333.075

3.24946E-07 5868.63 19302

2.77834E-07 1465.53 583.1 -2.51333

2.09512E-06 1996.33 820.25

2.82582E-07 3338.18 1605.8

1.38271E-06 4143.13 1739.38

7.39279E-05 793.575 328.1333 -2.41845

9.48599E-06 1221.45 515.55

5.14246E-07 4085.48 1934.83

1.11659E-07 1907.53 5077.625 2.66189

1.79245E-10 2785.38 10412.5

9.49617E-07 3078.1 8872.75 2.88254

1.14361E-08 5072.48 19750.9

1.64799E-06 #DIV/0! 1140.1 #DIV/0! 8.26832E-06 #DIV/0! 1701.68

0.000563416 #DIV/0! 526.55  
0.000109608 698.95 286.867

7.97657E-05 11038.3 32076.3  
1.1036E-06 960.667 387  
7.51784E-07 1090.35 #DIV/0!  
6.67545E-05 24969.3 55145.1

5.09517E-12 5912.5 2173.3 -2.72052  
7.57741E-09 2526.85 1068.375 -2.36513

2.47082E-06 3890.18 1745.68  
6.55342E-09 6217.53 2653.75  
1.58783E-07 3440.08 1614.9

9220

3.51521E-06 2034 986.375

4.90737E-09 3765.23 641.225

2.39738E-05 3303.6 1553.95

0.00224223 715.5 #DIV/0! #DIV/0!

2755  
2755

0.00353625 1019.13 463.725  
1.42361E-07 1458.03 474.55

1.25186E-06 146.4 513.5

8.39095E-09 7248.23 24550.23 3.38707

2.99593E-09 8729.18 31816.4

9.28887E-06 1081.63 477.725

0.000929135 7256.8 17132.7

/// 200030

/// 149013 /// 200030 /// 25832 /// 284565 /// 400818 /// 440670 /// 55672 /// 728841 /// 728912 /// 728936  
553149

0.000646276 227.033 595.5 2.62296

1.26634E-06 364.05 1686.43

0.000438051 4683.43 2320.15 -2.01859

|             |         |          |          |             |         |         |  |
|-------------|---------|----------|----------|-------------|---------|---------|--|
|             |         |          |          | 7.45865E-07 | 399.925 | 1940.68 |  |
|             |         |          |          | 0.000370713 | 8400.95 | 21477   |  |
|             |         |          |          | 0.000012913 | 2653.55 | 1276.68 |  |
|             |         |          |          | 1.65499E-08 | 3782.28 | 1660.8  |  |
| 0.00014033  | 2246.13 | 912.825  | -2.46063 | 3.14253E-07 | 3929    | 1124.4  |  |
| 6.00151E-07 | 580.7   | 210.8    | -2.75474 | 0.000390856 | 1166.13 | 567.05  |  |
| 3.95537E-10 | 4291.7  | 14433.38 | 3.36309  | 2.35296E-05 | 5551.48 | 11576.6 |  |
|             |         |          |          | 2.72157E-05 | 3709.28 | 1244.35 |  |
|             |         |          |          | 2.43834E-06 | 3245.65 | 1482.98 |  |
|             |         |          |          | 0.000177531 | 5929.5  | 12348.1 |  |
| 4.83634E-06 | 1130.9  | 2431.125 | 2.14973  |             |         |         |  |
| 1.54781E-07 | 973.525 | 2333.425 | 2.39688  |             |         |         |  |
| 1.86945E-10 | 2892.63 | 751.075  | -3.85131 | 1.41193E-06 | 4171.85 | 1644.5  |  |
| 8.01399E-08 | 798.35  | 198.2    | -4.028   |             |         |         |  |
| 3.27383E-05 | 1447.93 | 495.475  | -2.9223  |             |         |         |  |



|             |         |         |
|-------------|---------|---------|
| 0.000502862 | 6876.75 | 3336.13 |
| 0.000417371 | 8024.53 | 3912.3  |
| 3.79139E-07 | 2873.85 | 1125.7  |
| 0.00124776  | 929.3   | #DIV/0! |
| 3.44395E-05 | 740.45  | 340.5   |

1364

|             |         |          |         |             |        |         |
|-------------|---------|----------|---------|-------------|--------|---------|
| 1.73956E-06 | 5951.95 | 29220.25 | 4.90936 | 2.90608E-09 | 2782.1 | 25745.7 |
|-------------|---------|----------|---------|-------------|--------|---------|

|             |         |         |          |             |         |         |
|-------------|---------|---------|----------|-------------|---------|---------|
| 0.000945007 | 7354.88 | 14823.7 |          |             |         |         |
| 0.000338677 | 1384.05 | 615.85  | -2.24738 | 2.55478E-08 | 2185.48 | 454.575 |
|             |         |         |          | 9.57554E-09 | 1289.1  | 346.65  |

1656

|             |         |        |          |             |         |       |
|-------------|---------|--------|----------|-------------|---------|-------|
| 8.63781E-06 | 3590.33 | 1675.7 | -2.14258 | 0.000499562 | 265.867 | 646.7 |
|-------------|---------|--------|----------|-------------|---------|-------|

|             |         |         |
|-------------|---------|---------|
| 0.000454751 | 1299.73 | #DIV/0! |
|-------------|---------|---------|

0.000109615 1488.93 3316.9

|             |         |          |         |             |         |         |
|-------------|---------|----------|---------|-------------|---------|---------|
| 0.00257421  | 625.7   | 1629.925 | 2.60496 | 0.00012965  | #DIV/0! | 1471.73 |
|             |         |          |         | 5.32266E-05 | 742.7   | 6295.03 |
| 0.000027125 | 2605.33 | 10990.58 | 4.2185  | 1.81692E-07 | 1450.35 | 6868.45 |
|             |         |          |         | 6.28657E-05 | 207.775 | 522.3   |

|             |         |          |          |             |       |         |
|-------------|---------|----------|----------|-------------|-------|---------|
| 0.000116144 | 5244.13 | 2171.475 | -2.41501 | 0.000636826 | 760.6 | #DIV/0! |
|-------------|---------|----------|----------|-------------|-------|---------|

5.93557E-08 1999.73 4230.53

7.44564E-06 1747.95 798.95

0.000253342 352.05 831.2

|             |         |          |          |             |         |        |
|-------------|---------|----------|----------|-------------|---------|--------|
| 6.45597E-05 | 2658.23 | 1232.525 | -2.15673 | 1.43122E-05 | 3584.15 | 1650.7 |
|             |         |          |          | 2.89017E-05 | 827.075 | 372.8  |

40672

|  |  |  |  |             |        |         |
|--|--|--|--|-------------|--------|---------|
|  |  |  |  | 5.34714E-10 | 1010   | 319.733 |
|  |  |  |  | 2.53961E-06 | 2955.2 | 1324.5  |

|             |         |         |         |             |         |         |
|-------------|---------|---------|---------|-------------|---------|---------|
| 3.30822E-06 | 486.425 | 3593.05 | 7.38665 | 9.58975E-08 | 576.125 | 7777.18 |
|-------------|---------|---------|---------|-------------|---------|---------|





9.84613E-05 1451.85 6514.98

0.00144878 2313.75 997.475

0.00181864 1472.5 #DIV/0!  
8.70697E-08 #DIV/0! 1022.5

0.00067307 4804.6 25998.2 5.41111 1.47593E-05 2102.4 20450.6  
0.000174353 1801.25 11092.9 6.15845 3.42386E-06 813.2 8816.8

0.00076868 #DIV/0! 1118.733 #DIV/0!  
8.44195E-08 678.467 2225 3.27945 1.91349E-11 492.85 3371 6.83981 2.69986E-13 458.5 4431.23  
2.11431E-08 11925.4 33592.35 2.81687 4.29026E-09 7577.93 24291.5

9.63366E-08 16342.8 6801.55 -2.4028 1.58322E-07 19302.2 8353.28  
4.50661E-05 6503.63 2599.25 -2.50212 1.05055E-05 7909.85 2718.6  
0.000608585 37310.4 15974.6 -2.33561

J5  
J5

|             |         |        |         |             |         |          |         |             |         |         |
|-------------|---------|--------|---------|-------------|---------|----------|---------|-------------|---------|---------|
| 0.000197829 | 2456.15 | 7296.8 | 2.97083 | 6.91284E-10 | 3225.48 | 33689.7  | 10.4449 | 2.6825E-12  | 2393.5  | 46381.8 |
|             |         |        |         |             |         |          |         | 5.64911E-07 | 2403.28 | 9287.18 |
|             |         |        |         | 9.1876E-08  | 5104.2  | 17096.43 | 3.34948 | 4.71013E-08 | 4274.78 | 15607.8 |
|             |         |        |         | 6.72359E-09 | 9525.35 | 34033.98 | 3.57299 | 7.37718E-09 | 9293.93 | 33628.1 |

|             |        |         |
|-------------|--------|---------|
| 7.35938E-05 | 4251.3 | 1823.18 |
|-------------|--------|---------|

|             |         |        |          |
|-------------|---------|--------|----------|
| 0.000026811 | 1215.25 | 502.75 | -2.41721 |
|-------------|---------|--------|----------|

|           |       |        |
|-----------|-------|--------|
| 0.0013635 | 395.5 | 791.75 |
|-----------|-------|--------|

45139 /// 651789

|             |        |         |
|-------------|--------|---------|
| 5.89392E-05 | 1244.4 | 589.625 |
|-------------|--------|---------|

|             |         |         |
|-------------|---------|---------|
| 0.000900571 | 6239.65 | 2177.93 |
| 2.02362E-06 | 1244.58 | 507.575 |

|             |       |         |
|-------------|-------|---------|
| 0.000305348 | 570.8 | #DIV/0! |
|-------------|-------|---------|

|             |         |         |         |             |         |         |
|-------------|---------|---------|---------|-------------|---------|---------|
| 3.39287E-07 | 1123.1  | 2311.45 | 2.0581  | 6.75667E-11 | 1453.3  | 4310.73 |
| 6.30217E-10 | 3077.13 | 6677.4  | 2.17001 | 5.33296E-13 | 3741.68 | 10117.3 |
| 1.13544E-09 | 1586.68 | 3713.75 | 2.34059 | 2.30398E-14 | 2136.25 | 7403.23 |

|             |         |        |          |             |         |         |
|-------------|---------|--------|----------|-------------|---------|---------|
|             |         |        |          | 2.64663E-06 | 874.575 | 380.55  |
|             |         |        |          | 1.77387E-09 | 10743.5 | 4178.48 |
|             |         |        |          | 0.00153055  | 5964.85 | 2386.78 |
| 0.000107625 | 1969.58 | 745.85 | -2.64071 | 0.00385799  | 3004.33 | 1258.78 |

3259

|             |         |          |          |             |         |         |
|-------------|---------|----------|----------|-------------|---------|---------|
|             |         |          |          | 8.88471E-08 | 3684.8  | 1335.18 |
|             |         |          |          |             |         |         |
| 1.39038E-05 | 7038.98 | 2809.925 | -2.50504 | 8.57373E-06 | 9619.53 | 3975.35 |
| 1.314E-07   | 2253.08 | 974.1667 | -2.31282 | 1.52363E-11 | 2359.3  | 589.65  |

|  |  |  |  |             |         |         |
|--|--|--|--|-------------|---------|---------|
|  |  |  |  | 1.21403E-05 | 899.2   | 2105.38 |
|  |  |  |  | 2.6417E-08  | 8447.25 | 3318.95 |

|  |  |  |  |             |         |          |
|--|--|--|--|-------------|---------|----------|
|  |  |  |  | 7.25178E-07 | 3960.45 | 1371.8   |
|  |  |  |  | 8.33255E-09 | 4298.58 | 1129.05  |
|  |  |  |  | 1.49199E-09 | 4399.4  | 1842.5   |
|  |  |  |  | 1.27511E-11 | 5192.23 | 1669.73  |
|  |  |  |  | 3.41471E-12 | 3483.08 | 1389.025 |
|  |  |  |  | 1.12879E-13 | 4583.43 | 1516.5   |

|             |        |          |         |             |         |         |
|-------------|--------|----------|---------|-------------|---------|---------|
|             |        |          |         | 0.00147307  | 566.125 | 1164.2  |
| 0.000212552 | 440.75 | 1122.925 | 2.54776 | 0.000270973 | 516.525 | 1193.98 |

|  |  |  |  |             |         |       |
|--|--|--|--|-------------|---------|-------|
|  |  |  |  | 5.21437E-06 | 1686.85 | 796.5 |
|--|--|--|--|-------------|---------|-------|

|             |        |          |         |             |         |          |          |             |             |         |         |
|-------------|--------|----------|---------|-------------|---------|----------|----------|-------------|-------------|---------|---------|
|             |        |          |         |             |         |          |          |             | 8.03048E-05 | 1045.98 | 2205.15 |
| 5.90315E-07 | 4077.5 | 12656.25 | 3.10392 | 3.76949E-11 | 5147.63 | 32248.33 | 6.2647   | 1.68184E-10 | 5855.43     | 33573.7 |         |
|             |        |          |         | 3.02304E-05 | 1167.37 | 4622.425 | 3.9597   | 1.88955E-07 | 1212.95     | 9494.85 |         |
|             |        |          |         |             |         |          |          |             |             |         |         |
|             |        |          |         |             |         |          |          |             | 8.25959E-07 | 8971    | 3885.03 |
|             |        |          |         |             |         |          |          |             |             |         |         |
|             |        |          |         | 0.000399829 | 4742.98 | 14224.58 | 2.99908  | 1.43378E-05 | 2221.85     | 7974.95 |         |
|             |        |          |         | 2.67182E-05 | 7927.3  | 20266.93 | 2.5566   | 7.04959E-09 | 2955.95     | 13360.2 |         |
|             |        |          |         | 0.000448106 | 1594.9  | 3305.8   | 2.07273  | 0.000207672 | 1012.6      | 2192.03 |         |
|             |        |          |         | 2.00616E-08 | 640.65  | 1970.425 | 3.07567  | 6.58702E-08 | 383.125     | 1148.05 |         |
|             |        |          |         |             |         |          |          |             |             |         |         |
|             |        |          |         | 3.28572E-07 | 11466.1 | 4640.4   | -2.47092 |             |             |         |         |
|             |        |          |         | 5.56116E-09 | 3430.6  | 9271.025 | 2.70245  | 1.71622E-10 | 4277.15     | 13462   |         |
|             |        |          |         | 9.74809E-06 | 3835.98 | 11940.98 | 3.11289  | 2.03427E-06 | 4736.5      | 16924.5 |         |
|             |        |          |         | 0.000287749 | 322.05  | 763.45   | 2.37059  | 0.00100917  | 385.225     | 819.4   |         |
|             |        |          |         |             |         |          |          |             |             |         |         |
|             |        |          |         |             |         |          |          |             | 0.00044575  | 1206.03 | 470.525 |
|             |        |          |         |             |         |          |          |             | 6.39337E-06 | 1159.95 | 433.325 |
|             |        |          |         |             |         |          |          |             |             |         |         |
|             |        |          |         |             |         |          |          |             | 0.000151036 | 1611.03 | 3620.83 |
|             |        |          |         |             |         |          |          |             | 0.000132526 | 1361.68 | 3210.33 |
|             |        |          |         | 3.14314E-07 | 12356   | 32521.08 | 2.63202  | 1.13422E-05 | 5695.13     | 12861.4 |         |
|             |        |          |         | 3.54453E-06 | 1927.33 | 5136.825 | 2.66526  | 0.000483731 | 3262.7      | 6990.05 |         |
|             |        |          |         | 3.11282E-05 | 1506.5  | 3203.2   | 2.12625  | 1.51458E-06 | 1697.28     | 4331.9  |         |
|             |        |          |         |             |         |          |          |             | 9.28495E-07 | 1506.03 | 5191.2  |
|             |        |          |         |             |         |          |          |             |             |         |         |
|             |        |          |         | 0.00145847  | 792     | 2040.4   | 2.57626  | 0.000301492 | 1019.5      | 3609.6  |         |



5.92486E-06 3695.4 9964.65  
4.53516E-09 6322.53 19787

1.93202E-05 1529.33 703.2 -2.17481 2.28154E-05 2559.93 1165.38

90102

9.5021E-07 7337.2 1984.875 -3.69656 0.000180084 5779.68 2064.33  
1.22962E-08 1650.2 697.25 -2.36673 4.63348E-10 3803.65 1352.6

1.36226E-12 3304.55 15550.825 4.70588 9.10124E-18 1534.63 14839.95 9.67008 8.5197E-07 15734.4 7750.35  
0.00147608 2794.78 1214.575 -2.30103 4.8445E-17 1773.1 15715.4  
0.000375535 4707.2 2160.475 -2.17878 0.00226136 2627.3 1244.38

0.0035857 559.825 194.75  
0.000648902 627.125 283.475

0.000880264 658.633 #DIV/0!

7.24414E-09 2622.03 10860.5  
1.02661E-08 11470.1 40906.7

1.07294E-07 1281.13 3538.55 2.76206 3.52039E-07 32146.4 12170.4  
4.54983E-09 1605.03 6154.125 3.83429 1.38986E-10 2012.73 8067.13  
6.01486E-10 2575.15 12049.2

4.82015E-05 12790.9 29596.48 2.31387 2.86898E-05 13572.7 32141.5  
0.000159652 781.9 239.1 -3.27018 0.000963416 1527.48 505.033

1.12837E-09 1911.65 591.075  
9.03367E-06 1470.65 636.35

2.42788E-07 563.45 2730.325 4.84573 4.19438E-06 724.45 2846.55  
0.000202356 2787.03 9247.575 3.31808 1.18898E-09 3264.7 37115.18 11.3686 9.18399E-12 2041.33 41475.6  
8.29455E-08 10560.6 3811.975 -2.77037 5.8539E-06 15540.4 6854.8  
4.36665E-11 9967.2 2953.975 -3.37417 4.57859E-07 13978.3 6908.75

0.000394939 3023.58 1052.78  
6.78819E-05 1884.4 492.725

/// 100137049 /// 8681

7.6984E-06 618.05 1816.13  
0.000110008 1796.6 4970.3  
1.58799E-05 7233.7 40836.8  
0.001214 18551.9 50807.48 2.73867 7.27066E-07 10039.5 51878.4

0.000167802 745.25 279.8

0.000161601 1283.28 #DIV/0! #DIV/0!

/// 100134366 /// 285189 /// 5342 /// 5343

43

1.06139E-05 2502.83 6671.575 2.66562 0.000231654 1517.33 3470.78

5.6196E-07 10953.5 25386.8



3.66087E-06 4038 1506.6

5395

3.53467E-07 #DIV/0! 1133.7 #DIV/0! 5.02484E-07 732.325 1670.05 2.28048  
2.87984E-05 713.8 1900.975 2.66318 1.53498E-05 908.7 3501.65

0.000320318 7003.45 2789.85

0.000747287 262 1193.6

0.000530218 #DIV/0! 919.4 #DIV/0!

/// 5457

|             |         |           |          |  |             |         |          |          |
|-------------|---------|-----------|----------|--|-------------|---------|----------|----------|
|             |         |           |          |  | 0.000106371 | 2260.63 | 10236.9  |          |
|             |         |           |          |  | 0.00356244  | 1112.5  | 5109.43  |          |
|             |         |           |          |  |             |         |          |          |
|             |         |           |          |  | 4.06092E-05 | 1914.78 | 4147.73  |          |
|             |         |           |          |  |             |         |          |          |
|             |         |           |          |  | 0.000112451 | 537.55  | 1329.43  |          |
|             |         |           |          |  |             |         |          |          |
|             |         |           |          |  | 6.99406E-05 | 21884.5 | 9807.28  |          |
|             |         |           |          |  | 0.000092825 | 28359   | 11503.9  |          |
|             |         |           |          |  | 2.35054E-05 | 589.25  | #DIV/0!  |          |
|             |         |           |          |  |             |         |          |          |
|             |         |           |          |  | 0.000113184 | 1025.25 | 499.3    |          |
|             |         |           |          |  | 1.5815E-06  | 2240.95 | 816.925  |          |
|             |         |           |          |  |             |         |          |          |
|             |         |           |          |  | 4.66519E-06 | 12072.2 | 5747.48  |          |
|             |         |           |          |  |             |         |          |          |
|             |         |           |          |  | 1.85953E-07 | 25005.6 | 9712.75  | -2.57451 |
|             |         |           |          |  |             |         |          |          |
|             |         |           |          |  | 0.00148119  | 2957.78 | 1448.525 | -2.04192 |
|             |         |           |          |  | 0.000329279 | 866.75  | 397.25   | -2.18188 |
|             |         |           |          |  | 0.000022689 | 2034.98 | 4802.75  | 2.3601   |
| 9.37435E-05 | 17885   | 40399.15  | 2.25883  |  | 5.07301E-07 | 9077.43 | 24545.98 | 2.70407  |
| 4.59457E-06 | 14174   | 39945.15  | 2.81819  |  | 1.01515E-05 | 7579.28 | 20726.43 | 2.73462  |
|             |         |           |          |  |             |         |          |          |
|             |         |           |          |  | 0.00139899  | 1916.63 | #DIV/0!  | #DIV/0!  |
|             |         |           |          |  |             |         |          |          |
|             |         |           |          |  | 0.00236918  | 2035.53 | 958.25   | -2.12421 |
| 2.12615E-06 | 8215.2  | 3767.875  | -2.18033 |  |             |         |          |          |
| 5.57017E-10 | 737.4   | 2949.15   | 3.99939  |  | 1.3765E-06  | 1570.83 | 3995.8   | 2.54376  |
|             |         |           |          |  | 0.000114983 | 218.6   | 516.6    | 2.36322  |
|             |         |           |          |  | 0.000660764 | 367.7   | 1147.675 | 3.12123  |
| 2.77373E-05 | #DIV/0! | 634.93333 | #DIV/0!  |  |             |         |          |          |
|             |         |           |          |  |             |         |          |          |
|             |         |           |          |  | 0.000323955 | 2545.05 | 989.925  |          |
|             |         |           |          |  | 3.61801E-07 | 9733.18 | 4087.63  |          |
|             |         |           |          |  | 2.53096E-06 | 2944.4  | 7688.4   |          |
|             |         |           |          |  | 0.00161043  | 455     | 1053.25  |          |

0.000832463 681.35 1389.525 2.03937 9.84667E-08 649.5 2240.83

5534

2.58243E-08 19348.1 3475.88

/// 80148

2.63892E-09 1424.58 364.8

5.71525E-10 4332.98 1692.2  
0.000226424 209.15 976.275

0.00131309 #DIV/0! 1163.4 #DIV/0! 0.000893552 #DIV/0! 1236.6

9.58391E-05 1080.68 409.1  
0.00010024 831.15 302.867

3.67933E-06 3834.8 1334  
4.53423E-07 8081.75 2904.15  
8.71466E-05 2010.35 878.45

|             |         |         |
|-------------|---------|---------|
| 0.000123477 | 1140    | 2909.4  |
| 0.000118004 | 8994.65 | 2352.78 |

|             |         |         |
|-------------|---------|---------|
| 0.00030437  | 521.425 | 198.15  |
| 0.000013325 | 727.5   | #DIV/0! |

16

5.10267E-05 571.95 275.975 -2.07247

|             |         |       |
|-------------|---------|-------|
| 0.000021481 | 589.775 | 214.8 |
|-------------|---------|-------|

|             |        |      |
|-------------|--------|------|
| 5.97875E-07 | 4796.8 | 2376 |
|-------------|--------|------|

|             |       |         |
|-------------|-------|---------|
| 1.37583E-05 | 705.3 | 297.525 |
|-------------|-------|---------|

0.000232389 1829.63 4025.375 2.20011

|             |       |      |
|-------------|-------|------|
| 6.84911E-09 | 406.1 | 1858 |
|-------------|-------|------|

|             |         |        |
|-------------|---------|--------|
| 1.28754E-06 | 3734.68 | 957.65 |
|-------------|---------|--------|

|             |         |         |
|-------------|---------|---------|
| 1.27898E-07 | 3586.68 | 1533.63 |
|-------------|---------|---------|

7.91087E-05 4210.85 1971.225 -2.13616  
2.43893E-05 9178.73 4579.075 -2.00449

1.67038E-05 12271.6 6082.875 -2.01739  
2.80561E-08 21314 50246.25 2.35743

4.98601E-09 11509.2 3919.25  
1.36419E-10 11911.7 38999.2

9.54909E-09 4697.7 1907.93

1.02334E-06 3479.65 1682.55

4.21871E-06 3402.38 1650.55

6.3392E-07 14654 30501.48 2.08145

0.00139535 623.2 1302.33  
1.86889E-08 12688.8 30652.6

0.00122969 12134.1 28438.1 2.34365

2.00782E-07 3274.25 16404.2  
3.82849E-06 788.575 3240.63

0.000703171 6289.83 13381.6

4.50782E-05 1433.6 #DIV/0!  
0.00140201 1037.45 #DIV/0!

0.000507686 745.175 #DIV/0!

4.63675E-06 16973.8 39880.93 2.34956

0.00209318 643.833 1370.45

0.000368767 782.075 #DIV/0! #DIV/0!

0.000659407 721.15 #DIV/0!

0.000771752 836.025 320.267

0.000450383 1817.98 852.275

4.42928E-05 372.433 917.925 2.46467

0.0014781 601.025 1211.08

1.43723E-05 14668.2 6708

4.56707E-08 4709.33 2338.75

0.00219592 2888.9 6074.05

6.17358E-06 3904.88 1676.65 -2.32897

4.24492E-05 3883.93 1855.65

0.000106748 3457.68 1701.2

2.01213E-06 3340.5 8983.525 2.68928

2.14323E-08 6004.48 18976.3

1.05664E-09 16879.1 39171.08 2.32069

2.22874E-11 11752.2 32158.2

1.51953E-07 5649.4 13728.35 2.43005

0.000320958 639 266.7

3.53647E-10 2076.88 7200.75 3.46711 2.17146E-11 1664.88 6544.78

3.56925E-06 5720.6 1683.175 -3.3987 1.56798E-07 12423.7 3165.58

5.56559E-06 17316.8 7117.58

0.000256598 1076.73 521.55 -2.06447

9.98797E-08 6995.83 17687.2

0.000289069 887.3 386.9

1.19566E-07 8282.05 3659.225 -2.26333 0.000001679 10738 4963.13

3.27098E-08 6088.03 1615.025 -3.76962

1.26121E-05 3868.6 8501.15

1159

6.02527E-05 826.8 389.15

0.000708311 579.025 287.45 -2.01435

3.40955E-05 798.575 246.4 -3.24097 4.10179E-06 1709.6 440.375

/// 25788

|             |         |          |         |             |         |         |
|-------------|---------|----------|---------|-------------|---------|---------|
| 0.0014389   | 3998.33 | 18706.9  | 4.67868 | 4.74518E-05 | 3121.15 | 23591.2 |
| 0.000008475 | 10508   | 48044.23 | 4.57215 | 2.8977E-07  | 7803.98 | 51641.6 |

|             |         |          |         |             |         |         |
|-------------|---------|----------|---------|-------------|---------|---------|
| 5.25626E-06 | 24960.1 | 58509.88 | 2.34413 | 4.03286E-07 | 16150.1 | 42670.1 |
| 8.51629E-10 | 2715.93 | 9871.825 | 3.63479 | 1.44374E-11 | 1447.88 | 6509.98 |
| 6.65073E-12 | 3751.58 | 12966.78 | 3.45635 | 8.92075E-13 | 2144.6  | 8134.4  |

400966 /// 5903 /// 652919 /// 653489 /// 727851 /// 729540 /// 729857 /// 84220

|             |         |        |
|-------------|---------|--------|
| 1.21769E-05 | 1414.53 | 3765.3 |
|-------------|---------|--------|

|            |         |         |
|------------|---------|---------|
| 2.7868E-06 | 5117.35 | 10795.5 |
|------------|---------|---------|

/// 100133005 /// 100134722 /// 10156 /// 401331

|             |         |         |          |             |         |        |
|-------------|---------|---------|----------|-------------|---------|--------|
| 4.87053E-07 | 1963.93 | 592.075 | -3.31702 | 2.05057E-08 | 2520.03 | 627.45 |
|-------------|---------|---------|----------|-------------|---------|--------|

|             |         |         |
|-------------|---------|---------|
| 4.07887E-07 | 4263.73 | 1953.58 |
| 0.000174573 | #DIV/0! | 883.2   |

|             |         |          |         |             |         |         |
|-------------|---------|----------|---------|-------------|---------|---------|
| 4.78371E-09 | 974.5   | 2603.175 | 2.67129 | 2.42659E-09 | 1484.35 | 3902.83 |
| 1.72936E-06 | #DIV/0! | 1728     | #DIV/0! |             |         |         |

|             |         |         |
|-------------|---------|---------|
| 1.84189E-07 | 3716.13 | 1848.65 |
| 1.66886E-06 | 2659.1  | 5378.23 |



0.000781373 1782.88 3893.53

9.08351E-05 849.075 419

7.80908E-05 3833.38 1775.05 -2.15959 0.00018301 5736.35 2604.23

6.53444E-08 2591.98 834.075 -3.1076 6.33196E-05 4152.5 1966.28

9.36656E-13 3457.28 857.15 -4.03345 2.95332E-09 5209.88 1856.95

4.51248E-11 2220.08 #DIV/0! #DIV/0!

0.00020424 581.1 1456.075 2.50572 2.8287E-06 4102.88 8686.6 2.1172 1.91937E-06 4100.63 9275.4  
0.00101816 694.85 1839.025 2.64665 3.03736E-06 665.675 3120.7

3.95455E-06 24967.6 49995.08 2.0024 1.34752E-06 2490.55 592.725  
3.41813E-08 23285.7 57521

0.00138452 770.733 #DIV/0!

5.62536E-07 1469.88 545.025 -2.69689 5.07411E-07 2348.53 862.15  
8.32313E-09 1513.33 #DIV/0!

6.50441E-07 2016.55 860.625  
0.000394496 1412.45 635.45  
6.10918E-05 1668.18 799.3

0.000127361 753.425 363.4

|             |         |          |          |             |         |         |
|-------------|---------|----------|----------|-------------|---------|---------|
| 0.000175847 | 1082.98 | 462.425  | -2.34195 | 1.48586E-08 | 1389.78 | 310.65  |
| 6.63026E-06 | 2473.78 | 1059.325 | -2.33524 | 4.63167E-10 | 3488.18 | 947.925 |
|             |         |          |          | 2.59565E-06 | 6572.35 | 2503.13 |
| 4.45937E-06 | 11793.9 | 26269.25 | 2.22736  | 4.25008E-07 | 9184.7  | 22661.8 |
|             |         |          |          | 0.000469003 | 314.525 | 707.75  |
| 8.62003E-07 | 3832.55 | 7709.5   | 2.01158  | 8.67836E-08 | 3450.1  | 7368.28 |
| 4.86616E-08 | 12590.2 | 29944.75 | 2.37842  |             |         |         |

|             |         |        |  |  |  |  |
|-------------|---------|--------|--|--|--|--|
| 8.55425E-06 | 1408.55 | 633.05 |  |  |  |  |
|-------------|---------|--------|--|--|--|--|

|             |         |         |          |             |         |        |
|-------------|---------|---------|----------|-------------|---------|--------|
| 2.47019E-05 | 1555.83 | 557     | -2.79322 | 2.01534E-05 | 2508.75 | 766.35 |
| 4.86502E-05 | 8207.88 | 3381.65 | -2.42718 | 4.00311E-06 | 13302.1 | 4287.3 |
| 0.000932305 | 801.15  | 363.95  | -2.20126 |             |         |        |

|            |         |        |  |  |  |  |
|------------|---------|--------|--|--|--|--|
| 0.00278174 | 801.775 | 267.75 |  |  |  |  |
|------------|---------|--------|--|--|--|--|

|             |         |         |          |             |         |         |
|-------------|---------|---------|----------|-------------|---------|---------|
| 3.03959E-06 | 1686.55 | 671.025 | -2.51339 |             |         |         |
| 2.49873E-06 | 2012.13 | 964.8   | -2.08554 |             |         |         |
| 1.64204E-06 | 1376.83 | 517.775 | -2.65912 | 1.32347E-07 | 1336.08 | 425.775 |
| 5.20554E-05 | 682.825 | 295.1   | -2.31388 | 4.29696E-08 | 779     | 206.9   |

|             |         |         |  |  |  |  |
|-------------|---------|---------|--|--|--|--|
| 2.87929E-05 | 2045.43 | 977.967 |  |  |  |  |
|-------------|---------|---------|--|--|--|--|

|             |        |          |         |            |         |         |
|-------------|--------|----------|---------|------------|---------|---------|
| 0.000004273 | 1898.2 | 6753.975 | 3.55809 | 8.1606E-06 | 1442.75 | 4766.63 |
|-------------|--------|----------|---------|------------|---------|---------|

|             |        |        |  |  |  |  |
|-------------|--------|--------|--|--|--|--|
| 0.000605782 | 9857.3 | 4283.5 |  |  |  |  |
|-------------|--------|--------|--|--|--|--|

0.00004976 1094.45 486.175 -2.25114

2.45593E-09 7381.1 15008.3

5.06637E-07 1778.83 762.125 -2.33403

6.23975E-07 1689.8 819.367

2.56326E-06 1549.8 703.2

0.000778921 875.6 #DIV/0! #DIV/0!

5.56632E-11 5164.93 18851.975 3.65

4.16866E-14 4625.8 25469.05 5.50587

1.38525E-13 4947 26187.7

19

0.000223785 2967.8 1269 -2.33869

0.000315249 3036.78 1318.55

/// 100133583 /// 100133661 /// 100133811 /// 3119 /// 3120 /// 3123 /// 3124 /// 3125 /// 3126 /// 3127 /// 388567 /// 6036 /// 730415 /// 731247

0.000835377 29863.5 7582.8

0.000133958 9880.73 4799.78

1.67518E-07 564.775 200.8

2.07169E-07 3280.43 1196.175 -2.74243

1.17103E-05 5005.88 2351.35

5.10655E-08 2211.43 915.925 -2.41442

8.40677E-07 3865.65 1775.43

2.46989E-05 1813.15 813.8 -2.228

6.6117E-06 2657.5 1049.48

0.00115389 536.725 262.65

1.64887E-08 9617.65 19344.8

4.10006E-05 18266.3 8534.325 -2.14033

0.000121163 16336.2 7448.475 -2.19323 3.30309E-05 24162.5 10511.7

7.55907E-11 1437.98 4597.725 3.19736 8.0131E-18 887.45 7114.85 8.01718 9.94141E-17 1523.38 10220.5  
1.11679E-07 598.375 2338.45 3.908 1.36694E-13 394.925 3040.575 7.69912 1.24258E-13 452.15 3658.13

8.44344E-06 1604.75 612.6 -2.61957 8.89157E-06 3598.43 1445.53  
2.14972E-07 1211.1 571.375 -2.11962 6.75324E-09 2243.58 942.175

7.13846E-06 2306 762.025 -3.02615  
3.33815E-05 5676.58 2169.9 -2.61605 0.000259457 9845.3 4487.6

1.30565E-05 2607.9 720.325

0.000170881 2431.5 5414.6 2.22686 4.82778E-05 1539 4111.125 2.6713 2.70225E-06 1675.73 5040.38

/// 4736

3349

3.32011E-05 1355.53 3761.85

2.04629E-06 1501.38 555.55

4.75064E-08 5339.65 1636.975 -3.2619

1.37141E-06 9497.73 3299.33

2.02007E-07 14638.5 3896.55 -3.75679

0.00011386 19109.8 7945.55

7.16859E-10 5020.75 12219.7

1.53355E-08 8717.13 26788.4

3.51163E-06 1537.23 3157.98

0.000287829 8579.28 4270.325 -2.00904

0.00119982 628.567 #DIV/0!

2.64834E-06 18782.7 7025.125 -2.67364  
0.00134188 8192.8 17421.75 2.12647

0.00212549 15032.4 30124

0.00146319 1298.68 648.75 -2.00181

0.000475757 950.175 269.8

2.40763E-06 1442.55 3711.35 2.57277

0.000155291 2543.3 5273.05

2.92629E-05 7229.78 3463.55

0.000137879 4736.1 2013.53  
0.000871268 4573.9 1768.78

4.75513E-06 24517.9 58932.38 2.40364

0.000607639 842.9 1801.05 2.13673

5.36831E-10 629.5 3533.1

3.72572E-07 1540.13 3982.425 2.58578  
4.62941E-06 3006.4 7043.625 2.34288

2.62913E-11 1273.45 5969.85 4.68793  
3.22618E-11 2496.03 11222.98 4.49634  
0.000445116 #DIV/0! 1287.275 #DIV/0!

3.40198E-10 1272.78 5263.55  
1.45696E-08 2704 8442.9  
0.00386794 643.45 1348

0.00215939 6920.98 2573.38

0.000156851 2953.55 7723.8 2.61509

3.88275E-07 3814.08 1619.25 -2.35546

6.84185E-09 8185.58 2980.88

6.50849E-06 1037.83 400.725 -2.58987

8.43093E-08 1952.68 629.275

1.20487E-05 1624.88 669.65

5.62104E-05 1455.2 613.15

5.76704E-09 1335.5 416.233

0.000242089 1527.7 553.325 -2.76095

2.55651E-08 2674.25 369.1

1.84093E-06 6342.75 1039 -6.10467

2.34782E-10 10458.1 622.35

6.48593E-06 9717.03 1548.825 -6.2738

1.62391E-08 16086.6 1027.23

|             |         |           |         |             |         |          |         |             |         |         |
|-------------|---------|-----------|---------|-------------|---------|----------|---------|-------------|---------|---------|
| 4.89093E-07 | 8003.73 | 20123.9   | 2.51432 | 3.04839E-14 | 3333.75 | 20643.93 | 6.1924  | 4.14618E-14 | 2458.18 | 15318.6 |
| 7.29836E-06 | 4875.55 | 18529.525 | 3.8005  | 2.27712E-11 | 1467.25 | 17323.03 | 11.8065 | 3.37205E-12 | 1184.33 | 17963.6 |
| 1.67466E-09 | 420.275 | 1737.425  | 4.13402 | 3.29613E-14 | 236.55  | 2014.675 | 8.51691 | 2.30331E-14 | 317.825 | 3012.85 |

|             |         |          |         |             |         |         |
|-------------|---------|----------|---------|-------------|---------|---------|
| 1.88889E-06 | 6965.63 | 20240.25 | 2.90573 | 2.61062E-06 | 4898.13 | 15078.9 |
|-------------|---------|----------|---------|-------------|---------|---------|

|             |         |          |         |             |         |         |
|-------------|---------|----------|---------|-------------|---------|---------|
| 9.72817E-05 | 1546.03 | 3755.425 | 2.42908 | 1.86797E-06 | 1797.95 | 5167.58 |
|-------------|---------|----------|---------|-------------|---------|---------|

|             |         |         |
|-------------|---------|---------|
| 7.89576E-06 | 42830.1 | 18235.4 |
|-------------|---------|---------|

|             |         |          |         |             |         |         |
|-------------|---------|----------|---------|-------------|---------|---------|
| 5.48615E-06 | 6373.68 | 2318.967 | -2.7485 | 9.79194E-06 | 8844.83 | 2845.35 |
| 5.10937E-06 | 14713.7 | 5648.475 | -2.6049 | 1.20182E-06 | 19607.8 | 6527.55 |

|             |         |       |
|-------------|---------|-------|
| 3.21618E-07 | 819.275 | 253.1 |
|-------------|---------|-------|

|             |         |         |          |             |         |         |
|-------------|---------|---------|----------|-------------|---------|---------|
| 3.55909E-05 | 5985.95 | 2100.25 | -2.85011 | 3.78349E-07 | 1875.38 | 432.45  |
| 0.000603069 | 2426.28 | 873.125 | -2.77884 | 7.10809E-05 | 7954.45 | 3202.08 |

3293  
5764  
5764

|             |         |         |
|-------------|---------|---------|
| 3.60503E-05 | 17223.1 | 37386.2 |
|-------------|---------|---------|

|             |         |          |         |             |         |         |
|-------------|---------|----------|---------|-------------|---------|---------|
| 0.000101837 | 343.6   | 837.8333 | 2.4384  | 0.00063793  | 343.8   | 820.5   |
| 0.000233578 | 2509.05 | 5873.575 | 2.34096 | 9.69877E-07 | 1146.28 | 4198.98 |
| 1.12758E-05 | 2306.65 | 6287.35  | 2.72575 |             |         |         |

|             |         |          |         |             |         |         |
|-------------|---------|----------|---------|-------------|---------|---------|
| 0.000327551 | 16974.8 | 40999.9  | 2.41535 | 5.11017E-05 | 1355.45 | 4189.13 |
| 8.38513E-08 | #DIV/0! | 1199.367 | #DIV/0! | 1.06828E-08 | 3672.4  | 17665.6 |
| 3.36662E-05 | #DIV/0! | 1910.3   | #DIV/0! | 4.38111E-08 | #DIV/0! | 2056.53 |
|             |         |          |         | 1.90079E-07 | #DIV/0! | 4535.93 |



|             |         |          |         |             |         |         |
|-------------|---------|----------|---------|-------------|---------|---------|
| 9.52847E-06 | 2297.98 | 7292.95  | 3.17364 | 0.000535882 | 1818.35 | 4121.15 |
| 1.53808E-06 | 5244.35 | 11730.48 | 2.23678 | 2.10953E-09 | 4401.88 | 13625.5 |
| 6.09135E-11 | 4014.7  | 10057.23 | 2.5051  | 2.49064E-11 | 4370.63 | 11946.5 |
|             |         |          |         | 2.89431E-06 | 2145.25 | 4754.65 |

|             |         |         |          |             |         |         |
|-------------|---------|---------|----------|-------------|---------|---------|
|             |         |         |          | 2.56786E-07 | 13834.4 | 6913.43 |
| 1.18005E-06 | 10082.1 | 4859.15 | -2.07486 |             |         |         |

|  |  |  |  |             |       |         |
|--|--|--|--|-------------|-------|---------|
|  |  |  |  | 2.76354E-06 | 694.1 | 231.833 |
|--|--|--|--|-------------|-------|---------|

|  |  |  |  |             |        |        |
|--|--|--|--|-------------|--------|--------|
|  |  |  |  | 8.29307E-06 | 1177.5 | 501.95 |
|--|--|--|--|-------------|--------|--------|

|  |  |  |  |             |         |         |
|--|--|--|--|-------------|---------|---------|
|  |  |  |  | 5.08591E-10 | 8463.03 | 28695.9 |
|  |  |  |  | 9.03682E-12 | 4962.45 | 20621.5 |
|  |  |  |  | 4.22638E-08 | 2265.58 | 5608.1  |

|             |         |     |          |  |  |  |
|-------------|---------|-----|----------|--|--|--|
| 1.71369E-06 | 1305.88 | 600 | -2.17646 |  |  |  |
|-------------|---------|-----|----------|--|--|--|

|            |       |          |         |  |  |  |
|------------|-------|----------|---------|--|--|--|
| 0.00211195 | 304.2 | 670.2667 | 2.20337 |  |  |  |
|------------|-------|----------|---------|--|--|--|

5.48699E-05 1316.13 371.4 -3.54369  
8.07074E-07 887.25 387.75 -2.2882  
0.00022347 188.7 788.3667 4.17788

3.31596E-05 1656.63 474.05  
1.82274E-06 1040.75 465.45  
0.000714462 #DIV/0! 1139.38

0.000585054 227.65 539.375 2.36932

0.000118941 #DIV/0! 757.525

3.90997E-07 4009.85 17473.9  
4.45794E-06 10606.3 32712.5

0.00116811 7390.5 3496.6

0.000732271 3003.25 6174.63

1.53841E-05 991.775 4651.23  
3.38347E-06 1051.98 7167.15  
0.00157143 #DIV/0! 2363.6

0.00224718 2648.77 1049 -2.52504

///9121  
///9121

5.56187E-06 6194.65 2964.55 -2.08958

0.000264439 1869.18 933.3 -2.00276

1.05235E-05 5593.8 1933.53  
0.00002051 3087.83 1220.38

3.31087E-05 1235.37 #DIV/0!

0.000936952 1519.53 3751.525 2.46888

5.63148E-06 1589.05 5593.08  
0.000057413 1154.3 3206.1

0.00312624 1222.88 2463.1

0.00318972 6681.25 14798.3

6.62636E-05 542.9 1668.53

3.05849E-05 23425.7 80456.5

0.00417278 31199.4 72434.4

0.00188356 20210.5 49036.5

1.86019E-05 1107.7 446.4

0.00275958 #DIV/0! 582.667

1.6523E-09 7234.83 789.05

0.000679931 2467.5 #DIV/0!

1.24834E-06 563.3 3081.38

4.98979E-12 497.8 6057.55

6.97031E-08 349.15 1861.725 5.33216

6.20107E-05 3934.5 8539.175 2.17033 0.000035249 2082.23 4435.55 2.1302

4.69627E-05 2760.93 1146.6

3.07149E-06 1726.93 4508.475 2.6107

2.03557E-05 1352.55 3054.775 2.25853

4.3972E-06 1146.73 2385.125 2.07995

5515  
5515

9906

7.393E-11 2247.03 5929.83

5520

|             |         |          |          |             |         |          |          |             |         |         |
|-------------|---------|----------|----------|-------------|---------|----------|----------|-------------|---------|---------|
| 0.000217827 | 11765.8 | 5810.825 | -2.02481 | 2.65725E-08 | 27080.2 | 8339.875 | -3.24707 | 0.000176449 | 3522.33 | 10014.6 |
|             |         |          |          |             |         |          |          | 1.01038E-08 | 24068.3 | 6567.35 |
|             |         |          |          |             |         |          |          | 0.0012016   | 1193.73 | 595.075 |
|             |         |          |          | 5.4113E-07  | 1442.85 | 8572.4   | 5.9413   | 1.8571E-09  | 783.2   | 8820.28 |
|             |         |          |          | 4.16467E-08 | 2911.25 | 16813.1  | 5.77522  | 1.92154E-10 | 1516    | 15989.7 |
|             |         |          |          |             |         |          |          |             |         |         |
|             |         |          |          | 0.000044262 | 7241.9  | 3164.775 | -2.28828 | 4.29811E-06 | 12535   | 4426.78 |
|             |         |          |          | 2.01802E-06 | 14752.1 | 5686.175 | -2.59438 | 5.36711E-06 | 21409.5 | 8575.43 |

0.000611022 1224.33 582.5

0.00113464 700.267 194.8

5.27749E-06 7397.63 1214.35  
5.21384E-05 5263.25 1106.88  
0.000826052 1209.2 483.2  
1.94219E-08 #DIV/0! 5012.78

1.07825E-07 2699.95 16361.95 6.06009

1.72608E-05 1111.48 545.6 -2.03716

0.000153338 907.275 262.5

3234 /// 338821

/// 28231

0.000103257 1352.15 410.95

0.000243008 1373.4 5725.35  
6.57674E-05 2475 5595.6

2.45354E-09 4338.58 1943.375 -2.2325

0.000131589 7730.08 17038.7

2.15183E-06 727.1 188.767

1042 /// 653188

0.000102032 405.3 1044.83

0.000248131 691.375 287 -2.40897

4.60234E-07 6452.65 13378.3

2.59054E-05 24455.8 11564.78 -2.11468

0.0020483 2765 1321.8

0.00155615 2110 849.425

0.00125894 938.7 448.175 -2.09449

2.15105E-11 2026.43 12158 5.99973

5.97499E-15 1912.78 23827.5

1.72691E-05 2410.53 9282.25 3.85072

2.96192E-06 1592 6415.75

0.000153017 4329.15 9402.13

2.46396E-06 3749.63 1686.53

26

9.40548E-05 854.4 286.05

/// 54212

0.000747283 2794.93 #DIV/0!

0.000203965 769.6 4428.2  
8.89049E-05 697.325 1727.58

0.000871922 1158.35 568.175  
7.99199E-07 2394.1 863.075

0.000460263 4869.28 10671 2.1915 9.8639E-09 3282.7 16165.7

4.83429E-07 1139.58 536.4  
2.24117E-13 3161.1 #DIV/0!

6.17869E-05 3367.78 1658.175 -2.03101

0.00371354 3351.5 1321

3789

367

4.49917E-05 1415.78 6154.6 4.34716

2.92667E-05 599.567 #DIV/0!

6.88134E-07 1898.9 14466.08 7.61813 2.68709E-09 1394.7 23739.5

7.3756E-06 700.825 174.6

0.000287151 1537.25 722 -2.12916

0.00182969 419.475 844.475 2.01317



6.00977E-05 1598.68 4035.05 2.524

0.000021095 11590.6 4504.6 -2.57306

4.42148E-05 22785.3 9375.8

5.3348E-06 14462.6 4727.93

0.000126005 13424.2 5265.43

2.36563E-09 4988.53 1400.95 -3.56082

2.32172E-06 8394.68 3667.15

5.73747E-06 3739.93 1637.65 -2.28371

7.9606E-06 1895.35 880.033

0.000347368 7383.38 3235.7

0.00184302 13028.9 5563.375 -2.34191

0.00184946 14647.4 6266.53

0.00073296 7937.95 2932.95 -2.70647

6.69822E-05 636.7 1896.675 2.97891

1.19833E-07 #DIV/0! 1349.95

0.000136169 4300.9 9254.275 2.15171

4.66944E-07 2655.6 8539.93

0.000226871 5540.68 1510.725 -3.66756

7.55798E-05 9203.93 2536.33

7.37648E-08 802.45 #DIV/0! #DIV/0! 4.88409E-06 937.35 347.3

1.94824E-05 5366.03 11977.1

2.78932E-08 8086.05 19713

3.02949E-06 7329.7 3414.2 -2.14683 4.57912E-07 5651.88 2190.8

0.000603589 2282 919.35 -2.48219

/// 283507

0.00029955 8536.75 28051.6  
0.000201495 24124 56064.7

5818

6.84355E-06 1338.98 547.675

1.37375E-05 3925.43 1947.53

9.21392E-07 1612.15 764.133

0.000124075 646 305.275 -2.11612

4.01651E-06 1046.2 454.7

2.56359E-06 2232.68 885.675

2.52454E-08 4856.78 2175.53

1.69649E-06 5957.6 2469.2 -2.41277

2.51883E-06 9357.23 3791.38

1.36879E-05 1566.45 751.5

1.57492E-05 777.367 1749.3 2.25029

4.1606E-10 622.3 2244 3.60598

9.60682E-12 2040.63 10296.15 5.04559

3.1068E-09 732.55 2517.25 3.43628

2.46193E-12 1932.53 11335.2 5.86549

2.00649E-08 710.85 2734.1

9.76362E-10 720.45 2666.18

1.63197E-13 1276.03 9582.98

0.000411922 3109.1 6264.63

0.000296792 5566.58 11980.1

0.000062995 1940.23 5430.75

2.89473E-05 5469.98 13366.3

0.00126184 2521.35 1253.05 -2.01217

3.59738E-06 2338.8 1105.525 -2.11556

7.04124E-08 3664.15 1080.75

4.75855E-08 3042.65 1138.13

5967

5967

6.17026E-10 10261.9 2925.05 -3.50826

0.000710102 2112.5 717.8 -2.94302

0.00154223 1084 512.475 -2.11523

6.98897E-10 14846.6 4398.1

0.000447565 3003.73 1177.07

7.60796E-05 2725.93 1329.75

6.33402E-07 5562.53 2384.25 -2.33303

5.49174E-07 7702 3215.33

0.000075346 1279.03 5328.93

1.17333E-10 7730.23 20421.1

0.00342186 1508.98 3060.53

0.00127855 2562.68 7980.05

3.14639E-06 1624.95 731.025

0.00002897 1505.33 #DIV/0!

0.00348674 1599.68 3234.3

8.99219E-05 1499.63 3503.83

7.31061E-08 26015 12205

7.53484E-09 7750.53 2472.08

5.04759E-09 12533.6 4314.4

2.1743E-07 6267.15 2482.68

8.88831E-07 10685.2 4792.8 -2.22943

4.60578E-06 15703.8 7622.53

4.43919E-05 426.4 1213.8

0.001139 750.225 #DIV/0!

7.54214E-05 1400.78 4841.33

1.92578E-05 1054.05 424.225

0.000531298 3089.08 6762.65

|             |       |        |         |             |         |          |          |             |         |         |
|-------------|-------|--------|---------|-------------|---------|----------|----------|-------------|---------|---------|
|             |       |        |         | 5.06651E-07 | 3890.1  | 23322.08 | 5.99524  | 3.14996E-08 | 3087.1  | 26134.2 |
|             |       |        |         | 3.80352E-06 | 5190.3  | 25193.3  | 4.85392  | 6.92113E-08 | 3622.18 | 27548.6 |
|             |       |        |         |             |         |          |          | 0.000443066 | 168.45  | 623.3   |
|             |       |        |         |             |         |          |          | 0.000400487 | 1484.4  | 716.7   |
| 2.32233E-07 | 787.6 | 1667.3 | 2.11694 | 6.10284E-08 | 1036.58 | 2902.5   | 2.80009  | 4.58113E-11 | 961.25  | 4079.58 |
|             |       |        |         | 7.46651E-09 | 10154.8 | 21091.3  | 2.07698  | 6.36174E-07 | 1712.68 | 4572.55 |
|             |       |        |         | 3.38975E-06 | 3368.4  | 1483.95  | -2.26989 | 2.44161E-05 | 4227.85 | 1946.83 |

|  |  |  |  |  |  |  |  |            |         |         |
|--|--|--|--|--|--|--|--|------------|---------|---------|
|  |  |  |  |  |  |  |  | 0.00106313 | 3830.65 | 11580.5 |
|--|--|--|--|--|--|--|--|------------|---------|---------|

|  |  |  |  |  |  |  |  |             |         |        |
|--|--|--|--|--|--|--|--|-------------|---------|--------|
|  |  |  |  |  |  |  |  | 1.59374E-06 | 11038.2 | 5361.4 |
|--|--|--|--|--|--|--|--|-------------|---------|--------|

|  |  |  |  |  |  |  |  |             |       |         |
|--|--|--|--|--|--|--|--|-------------|-------|---------|
|  |  |  |  |  |  |  |  | 9.53971E-07 | 709.2 | 3381.05 |
|--|--|--|--|--|--|--|--|-------------|-------|---------|

|  |  |  |  |             |        |        |          |             |         |         |
|--|--|--|--|-------------|--------|--------|----------|-------------|---------|---------|
|  |  |  |  | 1.40176E-06 | 2925.3 | 1069.6 | -2.73495 | 6.94025E-08 | 623.8   | 2281.55 |
|  |  |  |  |             |        |        |          | 8.27786E-06 | 4657.15 | 1952.85 |

|  |  |  |  |             |        |          |          |             |       |         |
|--|--|--|--|-------------|--------|----------|----------|-------------|-------|---------|
|  |  |  |  | 0.00189865  | 545.9  | 1180.375 | 2.16225  | 2.26818E-07 | 519.1 | 1433.03 |
|  |  |  |  | 0.000159863 | 1371.5 | 637.9    | -2.15002 | 2.76433E-05 | 431.1 | 1281.05 |

51014

|  |  |  |  |            |         |        |         |             |         |         |
|--|--|--|--|------------|---------|--------|---------|-------------|---------|---------|
|  |  |  |  | 8.4344E-06 | 1010.48 | 2706.3 | 2.67825 | 6.61026E-05 | 558     | 1371.95 |
|  |  |  |  |            |         |        |         | 3.25178E-05 | 2263.38 | 14251.2 |

|  |  |  |  |             |        |         |          |             |         |        |
|--|--|--|--|-------------|--------|---------|----------|-------------|---------|--------|
|  |  |  |  | 0.000119723 | 3632.6 | 1457.45 | -2.49244 | 2.40763E-06 | 3719.23 | 1114.4 |
|--|--|--|--|-------------|--------|---------|----------|-------------|---------|--------|

53252

|  |  |  |  |             |         |          |         |  |  |  |
|--|--|--|--|-------------|---------|----------|---------|--|--|--|
|  |  |  |  | 3.26512E-07 | 8781.23 | 24052.83 | 2.73912 |  |  |  |
|--|--|--|--|-------------|---------|----------|---------|--|--|--|

|  |  |  |  |  |  |  |  |             |         |       |
|--|--|--|--|--|--|--|--|-------------|---------|-------|
|  |  |  |  |  |  |  |  | 2.57799E-05 | 774.675 | 253.4 |
|--|--|--|--|--|--|--|--|-------------|---------|-------|

0.000248176 6747.88 3154.825 -2.13891

2.68584E-07 37720.5 17660.2

2.47755E-07 1958.3 858.125 -2.28207

|             |         |          |          |             |         |         |
|-------------|---------|----------|----------|-------------|---------|---------|
| 0.000917042 | 911.475 | 433.075  | -2.10466 | 0.000084526 | 1532.53 | 602.65  |
| 0.00170456  | 676.55  | 314.2    | -2.15325 |             |         |         |
| 0.000057782 | 24063.3 | 6370.975 | -3.77702 | 0.000676415 | 27920.6 | 9409.63 |

/// 84187  
/// 84187

|             |         |         |
|-------------|---------|---------|
| 0.00016668  | 10489.9 | 3747.85 |
| 8.06478E-05 | 11242.5 | 4353.58 |

/// 84548

7335

|             |        |          |        |             |         |         |
|-------------|--------|----------|--------|-------------|---------|---------|
| 0.000255943 | 1388.8 | 3601.025 | 2.5929 | 9.55009E-06 | 1266.88 | 4364.43 |
|             |        |          |        | 4.12112E-08 | 6448.85 | 2461.53 |
|             |        |          |        | 0.00208497  | 768.267 | #DIV/0! |

|             |        |        |          |             |         |         |
|-------------|--------|--------|----------|-------------|---------|---------|
| 6.42246E-06 | 4032.8 | 1415.9 | -2.84822 | 2.28502E-05 | 6256.95 | 2379.53 |
|-------------|--------|--------|----------|-------------|---------|---------|

|             |         |         |
|-------------|---------|---------|
| 4.63536E-06 | 2360.33 | 907.575 |
|-------------|---------|---------|

549

|            |       |       |          |
|------------|-------|-------|----------|
| 0.00135926 | 803.7 | 357.7 | -2.24685 |
|------------|-------|-------|----------|

|             |         |        |
|-------------|---------|--------|
| 2.81831E-05 | 2271.85 | 4849.8 |
|-------------|---------|--------|

|             |         |         |
|-------------|---------|---------|
| 7.01091E-08 | 1267.03 | 3452.68 |
|-------------|---------|---------|



|             |         |          |         |             |         |         |
|-------------|---------|----------|---------|-------------|---------|---------|
| 0.000101651 | 1545.73 | 3931.875 | 2.54371 |             |         |         |
| 2.40635E-07 | 30663   | 71395.78 | 2.3284  | 6.90413E-09 | 19126.5 | 55417.8 |
| 4.16976E-08 | 20084.9 | 51947.78 | 2.58641 | 4.58509E-09 | 13113.2 | 38561.7 |

|             |      |          |         |             |         |         |
|-------------|------|----------|---------|-------------|---------|---------|
|             |      |          |         | 3.77408E-09 | 8408.15 | 24437.6 |
| 0.000011178 | 8133 | 18113.95 | 2.22722 | 4.33308E-08 | 9325.73 | 29196.3 |

|             |         |         |          |             |         |         |
|-------------|---------|---------|----------|-------------|---------|---------|
| 0.000117742 | 5773.28 | 2507.55 | -2.30236 | 6.93553E-06 | 5514.63 | 2107.65 |
|-------------|---------|---------|----------|-------------|---------|---------|

|             |         |          |          |             |         |         |
|-------------|---------|----------|----------|-------------|---------|---------|
| 0.000532966 | 28749   | 13566.45 | -2.11912 | 0.000932288 | 24971.3 | 12322.8 |
| 0.0012203   | 478.225 | 1168.55  | 2.44352  | 1.96751E-06 | 283.25  | 838.125 |

|             |         |          |          |             |         |         |
|-------------|---------|----------|----------|-------------|---------|---------|
| 6.44958E-10 | 2676.45 | 6071.975 | 2.26867  | 3.82414E-10 | 2703.98 | 6322.15 |
|             |         |          |          | 3.41116E-06 | 426.025 | 1602.18 |
| 0.000047661 | 12210.9 | 3771.975 | -3.23726 | 0.000171115 | 10693.8 | 3614.43 |
| 2.06087E-05 | 23554.9 | 8028.3   | -2.93398 | 5.86993E-05 | 20097   | 7175.75 |
| 6.18368E-05 | 6935.2  | 1792.225 | -3.8696  | 0.00025108  | 5721.3  | 1717.2  |

3741 /// 8742

|            |         |         |  |  |  |  |
|------------|---------|---------|--|--|--|--|
| 0.00040099 | 58287.5 | 28936.3 |  |  |  |  |
|------------|---------|---------|--|--|--|--|

|            |       |         |         |  |  |  |
|------------|-------|---------|---------|--|--|--|
| 0.00153353 | 132.1 | 519.675 | 3.93395 |  |  |  |
|------------|-------|---------|---------|--|--|--|

|             |         |          |          |  |  |  |
|-------------|---------|----------|----------|--|--|--|
| 3.93753E-07 | 12011.2 | 5523.225 | -2.17467 |  |  |  |
|-------------|---------|----------|----------|--|--|--|

|             |         |          |          |  |  |  |
|-------------|---------|----------|----------|--|--|--|
| 0.000038222 | 3763.5  | 1592.825 | -2.36278 |  |  |  |
| 8.19955E-07 | 3091.13 | 1522.125 | -2.0308  |  |  |  |

|             |         |         |          |            |        |     |
|-------------|---------|---------|----------|------------|--------|-----|
| 0.00250512  | 1230.08 | 584.6   | -2.10413 | 0.00279935 | 841.65 | 302 |
| 8.70969E-06 | 611.05  | #DIV/0! | #DIV/0!  |            |        |     |

|             |         |         |
|-------------|---------|---------|
| 1.13322E-07 | 5470.23 | 2690.98 |
| 0.00168233  | 13303.9 | 6464.43 |

|            |         |         |         |
|------------|---------|---------|---------|
| 0.00117775 | 1353.97 | #DIV/0! | #DIV/0! |
|------------|---------|---------|---------|

|            |         |        |         |
|------------|---------|--------|---------|
| 0.00059031 | 168.575 | 625.95 | 3.71318 |
|------------|---------|--------|---------|

|             |         |           |         |             |         |          |         |             |         |         |
|-------------|---------|-----------|---------|-------------|---------|----------|---------|-------------|---------|---------|
| 9.6398E-07  | 6924.13 | 19933.925 | 2.87891 | 6.66637E-14 | 5645.93 | 53710.85 | 9.51321 | 3.54748E-13 | 7621.95 | 64347   |
| 1.40316E-07 | 7370.55 | 25589.85  | 3.47191 | 8.15422E-14 | 6117.68 | 68341.7  | 11.1712 | 2.68347E-12 | 8285.15 | 68154.5 |
|             |         |           |         | 9.19742E-05 | 192.2   | 717.4    | 3.73257 |             |         |         |

|             |         |          |          |
|-------------|---------|----------|----------|
| 2.13902E-05 | 2405.18 | 1062.925 | -2.26279 |
| 3.90105E-05 | 10913.5 | 5331.55  | -2.04697 |

3738 /// 28755 /// 6955  
3738 /// 28755 /// 6955  
54

|             |        |         |         |             |        |         |
|-------------|--------|---------|---------|-------------|--------|---------|
| 3.83808E-06 | 1109.1 | 4089.3  | 3.68704 | 4.52234E-06 | 715.35 | 1670.53 |
| 0.000117428 | 668.45 | 1719.85 | 2.57289 |             |        |         |

|             |         |        |
|-------------|---------|--------|
| 3.09926E-08 | 1246.78 | 2792.9 |
|-------------|---------|--------|

|             |         |       |          |
|-------------|---------|-------|----------|
| 0.000050868 | 1937.93 | 918.7 | -2.10942 |
|-------------|---------|-------|----------|

3638 /// 28639

340206

2.9956E-07 2007.53 #DIV/0! #DIV/0! 2.52197E-08 3227.98 928.8

4126

3.96069E-07 1676.78 #DIV/0!  
2.41131E-05 2182.05 837.1

7.29148E-05 1331.75 607.13333 -2.1935

0.000231175 396.8 846.9 2.13432  
8.70647E-07 3108.28 1483.625 -2.09505 1.16299E-07 3376.78 1450.05  
7.99081E-10 4061.9 1308.275 -3.10478 2.03642E-08 6333.03 2355.45  
8.67735E-08 2801.1 1013.65 -2.76338 1.33877E-09 5186.58 1409.35

0.000273899 652.7 279.1

0.000669033 556.167 266.6

0.000198299 1092.95 481.3 -2.27083 3.11273E-05 2697.65 1124.58

5.50311E-07 697.725 309.125 -2.2571 2.05342E-07 790.825 339.65

0.000641678 2084.2 586.85 -3.5515 0.00124992 2057.38 794.933

1.78709E-05 1024.95 428.975

33864

9.98875E-05 48092.9 20841.08 -2.3076 1.19501E-06 32780.5 10179.2

2.81087E-05 26918.3 13288

|             |         |          |          |             |        |         |
|-------------|---------|----------|----------|-------------|--------|---------|
| 5.53202E-06 | 2497.8  | 666.3333 | -3.74857 | 4.87399E-07 | 3782   | 1236.95 |
|             |         |          |          | 0.00304525  | 810.7  | 392.25  |
| 3.44675E-07 | 1184.73 | 477.05   | -2.48344 | 4.13563E-08 | 2081.8 | 781.1   |

0.000416162 4013.55 2006.6 -2.00017

0.000247025 #DIV/0! 575.05

0.000912662 1240.77 #DIV/0! #DIV/0!

0.000183578 1341.2 625.25  
6.16864E-06 1000.28 2476.78

4.31021E-07 7524.8 2655.925 -2.83321

1.12953E-10 22536.9 6452.28  
3.16735E-10 7924.03 1825.68  
7.97358E-05 754.875 #DIV/0!

1567

0.00204222 1679.15 759.05 -2.21217

2.35889E-06 3680.5 8765.48

6.36723E-06 611.2 1379.13

11 /// 7314 /// 7316

0.000942564 2297.37 1011

0.000147153 1306.35 3533.15 2.7046  
0.000059885 3361.08 8476.3 2.5219  
6.84137E-05 2353.53 6210.725 2.6389

2.3822E-07 7708.85 3020.3  
1.58203E-07 1158.03 6184.6  
3.0578E-08 2681.25 12239.7  
2.10399E-07 2370.45 10072.7

2.27601E-05 #DIV/0! 1932.88

1.68536E-05 1013.38 465.067

1.02449E-07 4092.65 10007.9 2.44533 1.45247E-06 4542.08 10366.1

0.00224491 1613.23 676.275 -2.38546 1.44048E-05 5103.35 2486.9

0.000154403 12694.1 5779.825 -2.19628 2.39917E-05 12544 5362.7 -2.33912 2.1518E-06 12288.5 5142  
3.57727E-06 3659.85 1743

6.53132E-05 25024.8 11797.98 -2.12111 3.26843E-05 24313.8 10760.4

5559

8.32764E-09 2308.85 860.075

7.94572E-07 763.125 2164.35

1.32654E-06 13456.1 30597.5

4576 /// 54578 /// 54600 /// 54657 /// 54658

4576 /// 54578 /// 54600 /// 54657 /// 54658

1.48611E-07 853.275 3717.1  
0.00378201 467.7 1403.03

0.000377488 1254.3 2610.73  
0.000496374 966.05 3470.7

4.30039E-08 2011.03 812.05 -2.47648 3.93238E-09 2767.1 996.15  
1.05484E-06 2401 881 -2.72531

1.75336E-05 783.775 1917.93

0.00134792 959.85 2910.175 3.03191  
0.000174562 966.725 2491.825 2.57759  
0.000102275 #DIV/0! 894 #DIV/0! 7.66026E-05 #DIV/0! 1323.45  
2.73243E-08 467.675 1680.55 3.59341 6.66616E-10 461.3 2427.28  
1.19173E-10 312.133 1346.825 4.3149 1.16358E-11 365.025 2033.3

0.000706801 1083.85 2429.53

/// 8287

2.38448E-07 5198.95 2039.33  
1.16688E-07 2439.5 1139.88

7.77283E-12 9055.5 3481.55

/// 7416

0.000112137 1629.63 3647.95 2.23852 4.14732E-12 462.45 3395.225 7.34182 5.11122E-12 490.75 3618.78  
8.25198E-12 953.9 7733.775 8.10753 2.47047E-10 1213.35 8101.1

8.40821E-06 4609.35 18349.575 3.98095 0.000202218 1541.7 14906.75 9.66903 0.000184553 2983.63 6862.93  
1.51929E-08 3051.45 21878.23 7.16978 9.10594E-07 762.525 21879.5  
1.31172E-11 2243.48 32288.6  
1.10515E-09 1124 16223.5  
1.12191E-05 7771.4 45840.6 5.89863 1.4678E-08 4267.28 55225.4  
0.000227724 #DIV/0! 1314.8

6.97988E-08 561.967 1452.675 2.58498 1.76898E-10 394.725 3872.925 9.8117 7.41059E-14 358.967 6342.15  
8.42041E-13 532.575 3839.275 7.20889 3.82589E-16 512.4 6177.65

1.07657E-05 #DIV/0! 1850.08

7.36371E-06 15777.6 40727.2

6.96218E-05 1515.33 #DIV/0! #DIV/0!  
2.23405E-05 2342.18 5704.175 2.43542 3.53152E-07 2210.33 7145.1  
0.000349074 561.1 1971.675 3.51395

5.47322E-06 1979.23 870.95

4.38667E-06 3883.75 9772.98  
0.00416904 745.5 1739.18

5.82761E-06 1298.38 404.65 -3.20864 2.45887E-06 2249.05 618.275  
8.89967E-09 1035.7 #DIV/0! #DIV/0!  
2.92225E-05 758.55 378.15 -2.00595 1.50448E-05 912.9 430.9

1.27467E-05 864.7 262.3



2.69511E-06 7110.23 3228.65

1.23746E-07 2928.3 1170.8

0.000266366 356.9 741.675 2.0781 5.60409E-08 329.9 1196.63

0.000189281 #DIV/0! 613.725 #DIV/0!

0.00243814 1708.17 #DIV/0! #DIV/0! 7.66868E-06 4068.93 2020.28  
0.000744314 767.6 326.467

2.6505E-07 1560.35 533.425 -2.92515 1.21448E-06 2663.25 1122.18  
1.93623E-08 2144.85 749.1 -2.86324 1.23392E-06 3672.03 1603.83



|             |         |          |          |             |         |         |
|-------------|---------|----------|----------|-------------|---------|---------|
| 1.38024E-05 | 2827.45 | 1379.7   | -2.04932 | 5.63038E-06 | 5824.35 | 2694.18 |
|             |         |          |          | 2.11401E-07 | 8444.93 | 4136.6  |
|             |         |          |          | 1.31774E-06 | 6097.05 | 2809.4  |
|             |         |          |          | 0.00190512  | 2237.73 | 940.675 |
| 7.40329E-12 | 10691.6 | 27886.65 | 2.60829  | 8.53245E-12 | 11824.6 | 29553.2 |
| 0.00150052  | 538.9   | 1213.225 | 2.2513   | 3.02551E-07 | 498.15  | 2778.8  |
|             |         |          |          | 0.000953045 | 1171.43 | 576.125 |
| 6.73752E-07 | 2570.08 | 938.6    | -2.7382  | 6.09533E-05 | 2773.95 | 1152.08 |
|             |         |          |          | 3.97665E-06 | 2451.18 | 1007.98 |
|             |         |          |          | 1.17656E-08 | 12170.3 | 5321.93 |
|             |         |          |          | 1.43504E-06 | 3365.93 | 1500.65 |
|             |         |          |          | 1.11722E-06 | 1319.65 | 638.2   |
|             |         |          |          | 0.000170701 | 1297.55 | 525.5   |
| 1.01788E-06 | 8962.05 | 33949.53 | 3.78814  | 2.21005E-06 | 4857.65 | 16848   |
| 2.26757E-06 | 4388.43 | 2062.425 | -2.1278  | 8.18017E-09 | 4056.73 | 1521    |
|             |         |          |          | 0.00133537  | 760.7   | 373.9   |

6.84688E-08 1928.4 #DIV/0! #DIV/0!

0.000661037 3590.9 1550.33

0.000400114 1143.68 #DIV/0!

/// 9839

/// 9839

2.49542E-07 18208.9 38735.78 2.1273

0.0017869 7613.08 17563.48 2.30701

0.00032303 7975.48 20531.8

0.000899057 30349.2 15099.3 -2.00998

/// 7543 /// 7544

1.15117E-08 1912.38 780.675

5.76563E-07 1874.6 752.75

1.66711E-05 1548.08 729.05

2.98846E-10 7378.78 2974.5

9.27808E-05 2049.05 4461.7

/// 9204

0.00102961 672.6 331.45

3.30757E-06 6083.1 1250.53

3.97787E-09 3829.03 7778 2.03133

1.3029E-07 4207.6 10719.2

7.78141E-11 4248.08 10464.5

1.29909E-06 2706.55 6503.25

1.64461E-07 3528.23 9314.5

6.75974E-05 320.5 794.975 2.48042

0.000147998 1046.33 422.933

6.54325E-08 307.025 912.075 2.97069  
1.041E-07 343.667 1451.3 4.22299

1.2418E-10 632.45 2757.375 4.35983  
8.32433E-09 491.6 2637.35 5.36483

1.5596E-11 873.675 4379.68  
1.01571E-08 710.9 4118.68

0.000399078 947.25 #DIV/0! #DIV/0!

0.00100987 6018.85 2499.28

|             |         |          |         |             |         |         |
|-------------|---------|----------|---------|-------------|---------|---------|
| 9.53928E-10 | 12105.3 | 48177    | 3.97982 | 7.15379E-06 | 3889.05 | 1788.23 |
| 1.63105E-12 | 4376.98 | 17093.33 | 3.90528 | 1.17889E-08 | 12074.5 | 43627.8 |
|             |         |          |         | 2.68684E-11 | 5180.18 | 17145.1 |
| 4.01886E-06 | 2804.5  | 5789.025 | 2.06419 | 1.05289E-06 | 2244.43 | 5142.7  |
| 9.30998E-10 | 1512.93 | 3275.2   | 2.16481 |             |         |         |

|             |         |          |         |            |       |       |
|-------------|---------|----------|---------|------------|-------|-------|
| 2.85917E-06 | 469.425 | 2276.275 | 4.84907 | 0.00243375 | 280.8 | 620.9 |
| 4.11716E-09 | 884.1   | 7569.85  | 8.56221 |            |       |       |

/// 256112 /// 7587  
/// 256112

0.000436992 959.025 377.6

|             |         |          |         |             |         |         |
|-------------|---------|----------|---------|-------------|---------|---------|
| 9.10826E-11 | 635.875 | 4770.625 | 7.50246 | 1.49731E-11 | 1190.43 | 11253.6 |
| 8.86678E-06 | #DIV/0! | 2373.025 | #DIV/0! | 3.48378E-06 | 712.4   | 6247.85 |
|             |         |          |         | 3.18452E-10 | #DIV/0! | 1072.5  |
|             |         |          |         | 2.91119E-05 | #DIV/0! | 1151.5  |

/// 84307

|            |        |         |          |             |         |         |
|------------|--------|---------|----------|-------------|---------|---------|
| 0.00159018 | 872.55 | 416.125 | -2.09685 | 1.41866E-09 | 7510.88 | 3242.18 |
|------------|--------|---------|----------|-------------|---------|---------|

|           |         |       |          |             |         |         |
|-----------|---------|-------|----------|-------------|---------|---------|
|           |         |       |          | 8.09359E-06 | 5311.1  | 2462.28 |
|           |         |       |          | 6.73852E-05 | 2540.43 | 875.6   |
| 0.0010033 | 1387.25 | 630.8 | -2.19919 | 3.72099E-05 | 1271.48 | 424.75  |

|  |  |  |  |             |        |         |
|--|--|--|--|-------------|--------|---------|
|  |  |  |  | 0.000217366 | 2144.3 | 1052.15 |
|--|--|--|--|-------------|--------|---------|

|  |  |  |  |             |         |         |
|--|--|--|--|-------------|---------|---------|
|  |  |  |  | 6.68039E-05 | 696.375 | #DIV/0! |
|--|--|--|--|-------------|---------|---------|

|             |         |          |         |             |         |          |          |             |         |         |
|-------------|---------|----------|---------|-------------|---------|----------|----------|-------------|---------|---------|
|             |         |          |         | 1.32084E-06 | 5173.88 | 2256.8   | -2.29257 |             |         |         |
|             |         |          |         | 2.82255E-06 | 7329.1  | 3311.9   | -2.21296 |             |         |         |
|             |         |          |         | 0.000905688 | #DIV/0! | 509.9667 | #DIV/0!  |             |         |         |
| 8.61237E-17 | 886.75  | 6862.375 | 7.73879 | 8.4501E-15  | 1934.2  | 10450.25 | 5.40288  | 2.60246E-13 | 2226.9  | 9703.65 |
| 3.61381E-08 | 1810.88 | 6965.3   | 3.84637 | 1.07902E-07 | 2206.78 | 7927.9   | 3.59253  | 6.3125E-09  | 2552.33 | 12342.5 |
| 5.27437E-11 | 1108.65 | 6050.15  | 5.45722 | 6.51341E-09 | 1670.65 | 6530.375 | 3.90888  | 2.25156E-10 | 1486.65 | 8102.93 |
| 6.81218E-06 | 516.567 | 2028.8   | 3.92747 |             |         |          |          | 3.54121E-08 | 587.4   | 3676.8  |
| 1.6294E-12  | 1189.08 | 6141.65  | 5.16507 | 3.93476E-13 | 1842.95 | 9180.075 | 4.98119  | 2.43748E-12 | 1890.98 | 8255.55 |
| 1.8487E-08  | 218.85  | 1453.125 | 6.63982 | 0.00038677  | 429.775 | 1198.7   | 2.78913  | 6.65809E-05 | 520     | 1379.48 |

4.29901E-06 2134.88 5549.33

41339

|  |  |  |  |             |         |        |          |             |         |         |
|--|--|--|--|-------------|---------|--------|----------|-------------|---------|---------|
|  |  |  |  |             |         |        |          | 0.000117334 | 2194.85 | 899.475 |
|  |  |  |  | 0.000313897 | 15080.4 | 7185.4 | -2.09875 | 0.000294529 | 20813.1 | 8809.18 |
|  |  |  |  |             |         |        |          | 3.3723E-06  | 1269.68 | 549.975 |

|  |  |  |  |             |         |       |          |             |         |         |
|--|--|--|--|-------------|---------|-------|----------|-------------|---------|---------|
|  |  |  |  | 0.000125729 | 758.025 | 300.2 | -2.52507 | 0.00408375  | 1061.48 | 482.475 |
|  |  |  |  |             |         |       |          | 7.16964E-06 | 850.325 | 296.125 |
|  |  |  |  |             |         |       |          | 5.20476E-06 | 2069.75 | 983.9   |
|  |  |  |  |             |         |       |          | 0.000170228 | 2409.55 | 1037.38 |

|  |  |  |  |             |         |         |         |             |         |        |
|--|--|--|--|-------------|---------|---------|---------|-------------|---------|--------|
|  |  |  |  | 3.71371E-08 | 1130.05 | 2830.15 | 2.50445 | 3.68969E-06 | 1804.25 | 3691.7 |
|--|--|--|--|-------------|---------|---------|---------|-------------|---------|--------|

284323

2.41342E-05 843.25 418.35

0.000189753 2148.25 884.225

3.78789E-05 595.225 264.767

|  |  |  |  |             |         |          |          |  |  |  |
|--|--|--|--|-------------|---------|----------|----------|--|--|--|
|  |  |  |  | 1.71919E-05 | 816.925 | 300.8    | -2.71584 |  |  |  |
|  |  |  |  | 0.00011255  | 3386.43 | 1672.475 | -2.0248  |  |  |  |



/// 115123

8.51193E-05 2081.68 965.975 -2.155

0.000884975 502.425 #DIV/0! #DIV/0! 7.78935E-06 591.625 #DIV/0!

1.60456E-06 1093.8 452.8

3.13399E-06 5710.2 1615.05 -3.53562 6.20607E-10 10290.2 1650.78

1.68024E-05 2033.2 875.45

/// 375449

2.6539E-06 1312.13 466.95 -2.80999 7.34259E-06 1987.38 759.25 -2.61755 0.000836066 1609.78 758.85

0.000277349 797.625 343.667

0.000459373 548.5 242.8

2.71691E-05 1470.88 642.775 -2.28832

0.00114937 825.325 380.175

4.5763E-06 1369.68 480.975

1.17517E-05 3011.35 1387.6 -2.17019 1.00951E-08 2813.38 910.7

0.00005637 1445.48 601.4

0.00136523 2403.78 994.725 -2.41652

0.00226671 1922.2 812.925

0.00145593 841.375 331.95

0.000658077 579.35 258.55 -2.24077

0.00019893 2005.73 699.025

1.21111E-06 2618.83 1289.25

1.56572E-05 1946.05 836.975 -2.3251 3.99759E-06 1873.8 694.875

1.81212E-05 2536.85 653.175 -3.88387

1.12559E-06 2068.75 362.85





1.13518E-07 11079.1 3584.25 -3.09104

1.57448E-08 10679 3174.45

2.43942E-09 6273.05 2011.03

2.43972E-06 8658.95 3348.8 -2.58569 2.35185E-10 10978.1 2367.8

2.43717E-05 1024.3 487.325

8.72622E-07 1955.25 742.633

0.000679433 1612.1 582.775



3.68956E-05 1789.35 894.475 -2.00045

7.20542E-11 3976.53 1056.55

9.83344E-06 2134.2 836.75

4.11065E-09 2764.1 720.975

1.67117E-08 18561.6 7803.85 -2.37851

2.3201E-09 22902 8889.75

7.69741E-06 1984.25 835.7

0.000194075 4907.93 1949.9 -2.51701

8.55756E-05 5409.33 2065.83

2.69031E-05 14426.4 5318.675 -2.7124

6.57786E-06 16077.7 6085.18





1.59483E-05 898.15 292.1 -3.0748 2.07808E-05 1470.8 522.025 -2.81749 1.39135E-06 1280 380.025

7.81124E-05 364.833 1534.55

0.000999888 1235.88 502.925

3.31264E-08 506.1 166.5

1.52347E-05 557.25 180.5 -3.08726

4.53516E-05 588.8 251.225

2.32212E-08 3934.35 1096.85 -3.58695 1.71143E-05 3247.63 1405.43

6.42005E-08 2307.35 979.2

1.45103E-05 1385.63 514.55 -2.69289 2.56491E-08 1791.65 483.975

|             |        |         |          |             |        |        |
|-------------|--------|---------|----------|-------------|--------|--------|
| 6.55508E-06 | 9178.4 | 3776.15 | -2.43062 | 2.92622E-06 | 9431.2 | 3694.6 |
|-------------|--------|---------|----------|-------------|--------|--------|

|             |         |         |
|-------------|---------|---------|
| 0.000132132 | 3141.43 | 924.825 |
|-------------|---------|---------|

|             |         |         |
|-------------|---------|---------|
| 5.82979E-06 | 4292.28 | 1311.43 |
|-------------|---------|---------|

|             |     |        |
|-------------|-----|--------|
| 5.22341E-07 | 968 | 445.75 |
|-------------|-----|--------|

|             |         |         |
|-------------|---------|---------|
| 0.000011884 | 1246.28 | 528.05  |
| 5.46624E-07 | 1848.95 | 760.1   |
| 0.000124433 | 2343.2  | 1067.28 |



|             |        |         |
|-------------|--------|---------|
| 2.34464E-05 | 3017.9 | 1466.28 |
| 1.4427E-11  | 9865.5 | 3276.85 |

|            |       |       |
|------------|-------|-------|
| 0.00195678 | 283.9 | 650.8 |
|------------|-------|-------|

|             |       |         |
|-------------|-------|---------|
| 7.21177E-08 | 573.4 | 215.967 |
|-------------|-------|---------|

0.000205484 581.825 265.975 -2.18752

2.50948E-05 220.733 642.7

0.00423443 2141.28 995.1

2.98099E-09 466.475 1910.6

0.000127386 2471.8 5602.275 2.26648 5.74985E-07 1466 4941.85

0.000507013 556.55 1194.08

2.45638E-10 389.825 1641.6 4.21112 2.86E-13 282.325 1810.7 6.41353 9.05375E-13 329.975 1939.03

0.000106183 7278.9 2839.025 -2.56387 0.00165485 5779.35 2799.68

8.29152E-09 14072.6 32506.28 2.3099 6.37027E-07 12961.7 26935.5

2.8788E-06 13465.2 5662.875 -2.37781

4.14326E-06 743.225 1877.8 2.52656 1.53475E-09 521.433 2050.68



|             |         |          |         |             |         |          |         |  |             |         |         |
|-------------|---------|----------|---------|-------------|---------|----------|---------|--|-------------|---------|---------|
|             |         |          |         | 0.000169669 | 2577.63 | 5167     | 2.00456 |  | 1.28905E-05 | 1764.93 | 4350.58 |
|             |         |          |         |             |         |          |         |  | 4.63101E-06 | 1431.7  | 3137.9  |
|             |         |          |         | 1.18581E-08 | 12605.7 | 31203.48 | 2.47535 |  | 2.09623E-08 | 8770.48 | 22257.7 |
|             |         |          |         |             |         |          |         |  | 6.61275E-09 | 312.85  | 1319.2  |
|             |         |          |         | 3.91338E-05 | 97.1    | 579.6    | 5.9691  |  | 1.26793E-05 | 286.7   | 1697.05 |
|             |         |          |         |             |         |          |         |  |             |         |         |
| 3.83127E-05 | 1490.4  | 4247.725 | 2.85006 | 0.000225904 | 1483.8  | 3704.25  | 2.49646 |  |             |         |         |
| 5.72311E-06 | 397.033 | 979.325  | 2.46661 | 1.82336E-08 | 479.4   | 1424.2   | 2.9708  |  | 2.31454E-08 | 582.55  | 1899.75 |
|             |         |          |         |             |         |          |         |  |             |         |         |
|             |         |          |         | 7.45552E-14 | 494.725 | 1923.55  | 3.88812 |  | 1.17861E-11 | 654.725 | 2086.83 |
|             |         |          |         |             |         |          |         |  | 0.00197684  | 567.1   | 1939.9  |
|             |         |          |         | 9.31817E-06 | 900.25  | 2908.975 | 3.2313  |  | 8.82761E-06 | 774.633 | 2437.7  |
|             |         |          |         |             |         |          |         |  |             |         |         |
|             |         |          |         | 8.4754E-08  | 20514   | 49665.65 | 2.42106 |  | 4.91672E-08 | 15303.9 | 39089.6 |
|             |         |          |         |             |         |          |         |  |             |         |         |
| 0.000027172 | 217.8   | 670.75   | 3.07966 | 4.54115E-06 | 247.15  | 924.95   | 3.74246 |  | 1.1725E-08  | 274.125 | 1585.1  |
|             |         |          |         |             |         |          |         |  |             |         |         |
|             |         |          |         |             |         |          |         |  | 0.00218473  | 6897.9  | 13962.7 |
|             |         |          |         |             |         |          |         |  |             |         |         |
|             |         |          |         |             |         |          |         |  | 1.19618E-06 | 3519.78 | 8924.48 |
|             |         |          |         |             |         |          |         |  | 0.00102594  | 6410.53 | 14118.7 |
|             |         |          |         |             |         |          |         |  |             |         |         |
|             |         |          |         |             |         |          |         |  | 0.000385584 | 6395.55 | 17032.8 |
|             |         |          |         |             |         |          |         |  |             |         |         |
| 1.57331E-06 | 2477.78 | 8204.175 | 3.31111 | 3.85983E-11 | 1318.45 | 8231.275 | 6.24315 |  | 1.04589E-13 | 894.25  | 9974.43 |
|             |         |          |         | 2.13401E-09 | #DIV/0! | 954.15   | #DIV/0! |  | 3.41049E-12 | #DIV/0! | 1967.2  |
|             |         |          |         |             |         |          |         |  | 0.00137082  | 844.15  | 2272.55 |



|            |         |          |         |             |         |         |
|------------|---------|----------|---------|-------------|---------|---------|
|            |         |          |         | 2.63706E-05 | 2766.58 | 1210.18 |
|            |         |          |         | 0.000660309 | 721     | 1539.45 |
|            |         |          |         | 0.000961622 | 2073.15 | 7220.93 |
|            |         |          |         | 1.26539E-06 | #DIV/0! | 620.467 |
| 0.00238293 | 445.725 | 1113.625 | 2.49846 |             |         |         |
| 0.00141371 | 615.55  | 1796.35  | 2.91828 |             |         |         |







|             |         |         |          |             |         |         |
|-------------|---------|---------|----------|-------------|---------|---------|
|             |         |         |          | 3.62082E-05 | 1529.8  | 449.825 |
|             |         |         |          | 3.61873E-05 | 535.7   | 168.1   |
|             |         |         |          | 0.00402935  | 576.425 | 208.2   |
| 5.33802E-06 | 1652.3  | 405.675 | -4.07296 | 5.31591E-06 | 2023.7  | 511.325 |
| 1.1284E-09  | 2740.83 | 855.9   | -3.20227 | 2.70654E-10 | 2995.58 | 795.55  |
|             |         |         |          | 4.78293E-05 | 779.3   | 269.6   |
| 2.60478E-05 | 3354.08 | 1057.9  | -3.1705  | 4.80739E-06 | 3232.88 | 903.1   |
|             |         |         |          | 7.53366E-06 | 627.025 | 178.125 |
|             |         |         |          | 5.89959E-06 | 9785.78 | 3817.08 |
| 0.000124375 | 1009.75 | 456.7   | -2.21097 | 1.60859E-07 | 1937.15 | 780.875 |
|             |         |         |          | 2.10805E-10 | 2586.55 | 495.025 |
|             |         |         |          | 7.93068E-10 | 3941.75 | 873.725 |
|             |         |         |          | 1.98027E-06 | 3333.95 | 876.25  |
|             |         |         |          | 1.85897E-06 | 3947.2  | 996.075 |
|             |         |         |          | 0.00067447  | 795.05  | 345.5   |
| 0.000003016 | 4839.75 | 1598.9  | -3.02692 | 2.52939E-06 | 6634.88 | 2035.83 |
| 1.94001E-06 | 2586.13 | 969.675 | -2.667   | 5.01956E-06 | 2619.63 | 967.725 |

|             |       |          |         |             |        |         |
|-------------|-------|----------|---------|-------------|--------|---------|
| 5.89901E-05 | 605.4 | 247.2333 | -2.4487 | 1.22549E-05 | 627.95 | #DIV/0! |
|-------------|-------|----------|---------|-------------|--------|---------|

|           |         |         |          |             |         |         |
|-----------|---------|---------|----------|-------------|---------|---------|
| 0.0018698 | 1433.03 | 666.475 | -2.15016 | 8.09625E-06 | 2071.65 | 692.05  |
|           |         |         |          | 0.000716676 | 565.75  | 235.833 |

|  |  |  |  |             |      |         |
|--|--|--|--|-------------|------|---------|
|  |  |  |  | 0.000030129 | 3642 | 1213.53 |
|--|--|--|--|-------------|------|---------|

|             |         |        |          |            |       |         |
|-------------|---------|--------|----------|------------|-------|---------|
| 0.000311946 | 643.625 | 317.65 | -2.02621 | 0.00035427 | 917.6 | 398.225 |
|-------------|---------|--------|----------|------------|-------|---------|

|  |  |  |  |             |         |        |
|--|--|--|--|-------------|---------|--------|
|  |  |  |  | 0.000267425 | 1181.03 | 545.65 |
|--|--|--|--|-------------|---------|--------|

|             |         |        |         |             |         |         |
|-------------|---------|--------|---------|-------------|---------|---------|
| 9.97542E-07 | 5125.38 | 2138.6 | -2.3966 | 9.53074E-08 | 3827.38 | 1342.45 |
|-------------|---------|--------|---------|-------------|---------|---------|

|            |         |       |          |             |         |         |
|------------|---------|-------|----------|-------------|---------|---------|
| 2.6473E-07 | 1067.83 | 297.8 | -3.58571 | 0.000880419 | 952.275 | 240.025 |
|------------|---------|-------|----------|-------------|---------|---------|

|  |  |  |  |             |         |       |
|--|--|--|--|-------------|---------|-------|
|  |  |  |  | 0.000328933 | 819.675 | 408.8 |
|--|--|--|--|-------------|---------|-------|

|  |  |  |  |            |         |       |
|--|--|--|--|------------|---------|-------|
|  |  |  |  | 0.00374558 | 2842.78 | 938.3 |
|--|--|--|--|------------|---------|-------|

|  |  |  |  |             |         |         |
|--|--|--|--|-------------|---------|---------|
|  |  |  |  | 2.85217E-11 | 14032.8 | 5210.88 |
|--|--|--|--|-------------|---------|---------|

|             |         |        |          |             |         |         |
|-------------|---------|--------|----------|-------------|---------|---------|
| 6.11618E-06 | 4168.88 | 1781.9 | -2.33957 | 6.82242E-08 | 3457.03 | 1056.13 |
|-------------|---------|--------|----------|-------------|---------|---------|

|  |  |  |  |             |         |       |
|--|--|--|--|-------------|---------|-------|
|  |  |  |  | 0.000687635 | 877.475 | 415.9 |
|--|--|--|--|-------------|---------|-------|

|  |  |  |  |             |         |         |
|--|--|--|--|-------------|---------|---------|
|  |  |  |  | 1.61897E-07 | 15894.6 | 6430.25 |
|--|--|--|--|-------------|---------|---------|



0.000040985 1194.55 469.3

2.56083E-05 1478.55 664.675 -2.22447 2.06482E-05 1838.38 821.5

7.24518E-05 4245.85 1911.325 -2.22142 5.30488E-05 4706.3 1927.38

0.000443046 656.525 178.7

0.000142844 726.375 268.333

0.000216739 935.425 457.675 -2.04386

3.80164E-05 9447.43 4599.85 -2.05386

5.99051E-05 11264.8 5206

0.000140318 653.25 230.6

1.78735E-05 3022 1242.83

6.12253E-05 3044.93 1070.375 -2.84473

0.00436214 4145.6 1889.4

1.11836E-05 559.125 267.3333 -2.09149

8.95565E-05 799.5 329.7667 -2.42444

|             |         |          |          |             |             |         |         |
|-------------|---------|----------|----------|-------------|-------------|---------|---------|
|             |         |          |          |             | 0.00406468  | 2552.45 | 1240.35 |
| 1.70442E-05 | 1895.63 | 615.475  | -3.07994 | 0.000182147 | 2105.08     | 862.325 |         |
| 0.000367272 | 3645.9  | 1779.15  | -2.04924 |             |             |         |         |
| 0.000106163 | 3323.75 | 1123     | -2.95971 |             |             |         |         |
| 1.34572E-07 | 270     | 713.775  | 2.64361  | 1.03398E-07 | 303.933     | 827.975 |         |
|             |         |          |          | 5.0165E-07  | 559.8       | 1435.6  |         |
|             |         |          |          | 3.64422E-06 | 2571.3      | 6513.83 |         |
|             |         |          |          | 4.36689E-07 | 551.375     | 1563.83 |         |
| 2.06642E-06 | 2105.2  | 6958.425 | 3.30535  | 3.50981E-08 | 954.55      | 4284.65 |         |
|             |         |          |          | 1.00181E-05 | #DIV/0!     | 855.475 |         |
| 4.30158E-05 | 741.9   | 2054.825 | 2.76968  | 7.68202E-07 | 717.425     | 2553.4  |         |
|             |         |          |          | 3.55912     | 5.57309E-08 | 707.825 |         |
| 6.39244E-05 | 3764.05 | 10349.25 | 2.7495   | 0.00114974  | 1050.75     | 2647.38 |         |
|             |         |          |          | 2.46676E-08 | 2274.43     | 13295.5 |         |
|             |         |          |          | 0.000221852 | 3213.5      | 8177.63 |         |
|             |         |          |          | 0.000020309 | 1213.8      | 272.85  |         |
| 5.16489E-05 | 2483.95 | 467.925  | -5.30844 | 5.56084E-07 | 3464.75     | 871.233 |         |
| 4.6439E-06  | 2565.83 | 767.45   | -3.34331 | 0.00275594  | 2141.85     | 866.15  |         |
|             |         |          |          | 0.000220515 | 981.075     | 477.1   |         |
|             |         |          |          | 9.45764E-05 | 3314.43     | #DIV/0! |         |
|             |         |          |          | 0.00309456  | 623.6       | #DIV/0! |         |



|  |  |  |  |             |         |          |          |  |             |         |         |
|--|--|--|--|-------------|---------|----------|----------|--|-------------|---------|---------|
|  |  |  |  |             |         |          |          |  | 3.27979E-07 | 8621.1  | 3594.23 |
|  |  |  |  |             |         |          |          |  | 0.00154052  | 1016.88 | 424     |
|  |  |  |  |             |         |          |          |  | 0.00228836  | 810.975 | 342.075 |
|  |  |  |  |             |         |          |          |  | 1.34332E-08 | 1608.1  | 687.7   |
|  |  |  |  | 4.34325E-07 | 5136.05 | 1623.875 | -3.16284 |  | 2.08592E-05 | 7805.43 | 3348.2  |
|  |  |  |  |             |         |          |          |  | 1.56547E-05 | 950.775 | 439.65  |
|  |  |  |  |             |         |          |          |  | 0.00273816  | 975.825 | 454.1   |
|  |  |  |  | 4.69634E-05 | 3087.48 | 1210.875 | -2.54979 |  | 0.00167063  | 4309.88 | 2009.7  |
|  |  |  |  |             |         |          |          |  | 3.63388E-05 | 3339.23 | 1557.15 |
|  |  |  |  |             |         |          |          |  | 2.53796E-05 | 1427.08 | 669.95  |
|  |  |  |  |             |         |          |          |  | 8.11129E-07 | 1552.15 | 735.325 |
|  |  |  |  |             |         |          |          |  | 0.000538705 | 567.575 | 269.975 |
|  |  |  |  |             |         |          |          |  | 0.00040361  | 5529.25 | 2630.5  |
|  |  |  |  | 1.67273E-05 | 2051.68 | 551.6    | -3.7195  |  | 0.00212073  | 1720.55 | 825.35  |
|  |  |  |  |             |         |          |          |  | 9.85097E-06 | 1415.9  | 685.55  |
|  |  |  |  |             |         |          |          |  | 0.00261991  | 5201.73 | 2519.5  |
|  |  |  |  |             |         |          |          |  | 0.00390312  | 2266.65 | 1107.58 |
|  |  |  |  |             |         |          |          |  | 0.0001594   | 1763.85 | 863.475 |
|  |  |  |  | 7.28646E-05 | 1498.98 | 690.025  | -2.17235 |  | 0.000739159 | 284.875 | 572.625 |
|  |  |  |  |             |         |          |          |  | 0.000705773 | 306.05  | 616.2   |
|  |  |  |  | 0.000359063 | 308.367 | 621.15   | 2.01432  |  | 0.000575078 | 275.425 | 556.45  |
|  |  |  |  |             |         |          |          |  | 0.00291533  | 771.05  | 1565.15 |
|  |  |  |  |             |         |          |          |  | 0.00176046  | 472     | 972.725 |
|  |  |  |  |             |         |          |          |  | 0.000160287 | 1136.38 | 2385    |
|  |  |  |  |             |         |          |          |  | 0.000183767 | 1044.78 | 2216.9  |
|  |  |  |  | 2.72248E-06 | 2058.68 | 5537.75  | 2.68996  |  | 0.000282955 | 1609.6  | 3449.3  |
|  |  |  |  |             |         |          |          |  | 3.20847E-05 | 1762.88 | 3804.6  |
|  |  |  |  |             |         |          |          |  | 6.95219E-06 | 1610.65 | 3496.3  |
|  |  |  |  | 2.12407E-05 | 3963.15 | 7928.05  | 2.00044  |  | 3.24591E-06 | 997.075 | 2169.9  |
|  |  |  |  |             |         |          |          |  | 0.00191823  | 840.975 | 1853.83 |
|  |  |  |  |             |         |          |          |  | 1.59446E-07 | 2792.73 | 6305.85 |
|  |  |  |  |             |         |          |          |  | 2.06609E-05 | 659.6   | 1520.43 |
|  |  |  |  |             |         |          |          |  | 0.000398674 | 573.825 | 1349.53 |
|  |  |  |  |             |         |          |          |  | 4.74509E-05 | 405.3   | 956.8   |
|  |  |  |  |             |         |          |          |  | 0.00166432  | 216.2   | 514.1   |
|  |  |  |  |             |         |          |          |  | 6.36351E-06 | 630.4   | 1511.58 |
|  |  |  |  |             |         |          |          |  | 0.000124329 | 573.025 | 1431.65 |
|  |  |  |  |             |         |          |          |  | 1.04405E-05 | 890.275 | 2355.93 |
|  |  |  |  | 2.61937E-06 | 1354.85 | 3955.625 | 2.9196   |  | 7.02209E-07 | 918.325 | 2464.05 |
|  |  |  |  | 1.26252E-05 | 1147.6  | 2543.05  | 2.21597  |  | 1.89281E-06 | 603.05  | 1675.73 |
|  |  |  |  |             |         |          |          |  | 1.33963E-05 | 582.575 | 1722.55 |
|  |  |  |  | 3.79324E-05 | 986.45  | 2712.825 | 2.75009  |  | 1.19249E-05 | 200.2   | 1231.3  |
|  |  |  |  | 3.97073E-07 | 162.733 | 836.825  | 5.14231  |  | 0.000309093 | #DIV/0! | 2378.03 |
|  |  |  |  | 2.64339E-06 | #DIV/0! | 2821.767 | #DIV/0!  |  | 0.00334319  | #DIV/0! | 568.125 |
|  |  |  |  | 0.000597909 | #DIV/0! | 540.225  | #DIV/0!  |  | 5.55685E-05 | #DIV/0! | 1149.4  |
|  |  |  |  |             |         |          |          |  | 9.29389E-05 | 1002.08 | #DIV/0! |
|  |  |  |  |             |         |          |          |  | 9.48955E-05 | #DIV/0! | 676.667 |
|  |  |  |  |             |         |          |          |  | 0.000118134 | #DIV/0! | 1680.6  |
|  |  |  |  |             |         |          |          |  | 0.000221157 | #DIV/0! | 891.633 |
|  |  |  |  |             |         |          |          |  | 0.000465395 | 517.467 | #DIV/0! |
|  |  |  |  |             |         |          |          |  | 0.000765418 | 768.85  | #DIV/0! |
|  |  |  |  |             |         |          |          |  | 0.00129471  | 598.95  | #DIV/0! |
|  |  |  |  |             |         |          |          |  | 0.00247334  | 611.925 | #DIV/0! |
|  |  |  |  |             |         |          |          |  | 0.00428261  | 1081.37 | #DIV/0! |
|  |  |  |  | 2.37508E-08 | 8064.88 | 2719     | -2.96612 |  |             |         |         |
|  |  |  |  | 5.36936E-06 | 1940.25 | 678.1    | -2.8613  |  |             |         |         |
|  |  |  |  | 5.06125E-05 | 1471.05 | 523.525  | -2.80989 |  |             |         |         |
|  |  |  |  | 0.00144556  | 844.55  | 305.225  | -2.76698 |  |             |         |         |
|  |  |  |  | 0.00105134  | 1803.5  | 695.325  | -2.59375 |  |             |         |         |
|  |  |  |  | 3.16646E-07 | 16797.7 | 6803.325 | -2.46904 |  |             |         |         |
|  |  |  |  | 0.000893209 | 943.25  | 392.45   | -2.40349 |  |             |         |         |
|  |  |  |  | 8.03039E-06 | 2365.68 | 1011.3   | -2.33924 |  |             |         |         |
|  |  |  |  | 0.000105684 | 1367.83 | 623.95   | -2.1922  |  |             |         |         |

|             |         |           |          |             |         |          |          |
|-------------|---------|-----------|----------|-------------|---------|----------|----------|
|             |         |           |          | 0.000107537 | 2734.28 | 1253.55  | -2.18123 |
|             |         |           |          | 3.27317E-05 | 5795.7  | 2685.275 | -2.15833 |
|             |         |           |          | 8.80518E-07 | 34775.9 | 16302.18 | -2.13321 |
|             |         |           |          | 0.000186863 | 3032.38 | 1448.35  | -2.09368 |
|             |         |           |          | 0.0002145   | 6662.83 | 3226.775 | -2.06486 |
|             |         |           |          | 0.00111237  | 16579.1 | 8234.65  | -2.01333 |
|             |         |           |          | 0.000611086 | 433.075 | 881.925  | 2.03643  |
|             |         |           |          | 0.000401365 | 1029.67 | 2191.9   | 2.12875  |
|             |         |           |          | 0.00118789  | 340.975 | 781.575  | 2.29218  |
| 5.10167E-05 | 3645.28 | 10614.025 | 2.91172  | 1.18259E-05 | 2135.05 | 5550.2   | 2.59956  |
|             |         |           |          | 1.63151E-06 | 490.025 | 2073.85  | 4.23213  |
|             |         |           |          | 0.000201759 | #DIV/0! | 1882.067 | #DIV/0!  |
|             |         |           |          | 0.00136214  | 766.775 | #DIV/0!  | #DIV/0!  |
|             |         |           |          | 0.00163166  | 793.433 | #DIV/0!  | #DIV/0!  |
| 1.24039E-06 | 2347.93 | 1112      | -2.11144 |             |         |          |          |
| 0.000147819 | 339.167 | 787.8     | 2.32275  |             |         |          |          |
| 2.23714E-05 | 123.1   | 637.95    | 5.18237  |             |         |          |          |

| LVS/ctrl \ANOVA (0.0160375) | 24 hr       |         |          |                   | 48 hr       |         |          |                   | KEY<br>#DIV/0! = The |
|-----------------------------|-------------|---------|----------|-------------------|-------------|---------|----------|-------------------|----------------------|
|                             | Avg ctrl    | Avg LVS | LVS/ctrl | ANOVA (0.0232922) | Avg ctrl    | Avg LVS | LVS/ctrl | ANOVA (0.0232922) |                      |
|                             | 1.23631E-06 | 1286.93 | 462.675  | -2.78149          | 0.00487976  | 952.35  | #DIV/0!  | #DIV/0!           |                      |
|                             | 1.69008E-06 | 6132.9  | 2644.23  | -2.31936          | 9.11292E-05 | 1914.53 | 865.575  | -2.21185          |                      |
|                             |             |         |          |                   | 2.63232E-11 | 11810.8 | 3088.3   | -3.82436          |                      |
|                             |             |         |          |                   | 9.74554E-09 | 2291.47 | 5639.43  | 2.46105           |                      |
|                             |             |         |          |                   | 0.00258678  | 5386.53 | 2477.3   | -2.17436          |                      |
| -3.2587                     | 6.99012E-07 | 4729.33 | 1287.53  | -3.67319          |             |         |          |                   |                      |
| -3.1731                     | 7.44858E-06 | 2672.25 | 769.2    | -3.47406          |             |         |          |                   |                      |
|                             |             |         |          |                   | 0.000173996 | 6684.48 | 19223.4  | 2.87582           |                      |
|                             |             |         |          |                   | 1.85978E-08 | 5407.08 | 18883.9  | 3.49243           |                      |
|                             |             |         |          |                   | 2.98442E-06 | 1374.45 | 584.4    | -2.3519           |                      |
|                             |             |         |          |                   | 0.020711    | 1549.7  | 573.125  | -2.70395          |                      |
|                             |             |         |          |                   | 0.00691964  | 842.867 | 406.7    | -2.07245          |                      |
| -2.1382                     | 3.53856E-05 | 2213.58 | 912.8    | -2.42504          | 3.44447E-05 | 3014    | 1280.8   | -2.35322          |                      |
|                             |             |         |          |                   | 0.0180352   | 1326.8  | 440.067  | -3.015            |                      |
|                             | 0.004333    | 1064.73 | #DIV/0!  | #DIV/0!           |             |         |          |                   |                      |
|                             |             |         |          |                   | 0.00213823  | 1158.47 | 345.2    | -3.35593          |                      |
|                             |             |         |          |                   | 0.00355717  | 1054.73 | 523.567  | -2.01452          |                      |
|                             | 0.000139618 | 919.667 | 183.7    | -5.00635          |             |         |          |                   |                      |
| -2.5816                     | 7.07502E-10 | 1427.65 | 340.6    | -4.19157          |             |         |          |                   |                      |
| -4.24                       | 0.00546574  | 744.375 | 340.15   | -2.18837          |             |         |          |                   |                      |
| -2.9002                     | 1.95269E-11 | 3440.65 | #DIV/0!  | #DIV/0!           |             |         |          |                   |                      |
|                             | 0.000238847 | 1213.6  | 400.033  | -3.03375          | 3.35534E-05 | 3118.75 | 749.85   | -4.15917          |                      |
|                             | 2.49161E-07 | 1736.03 | 557.05   | -3.11646          | 1.34884E-10 | 4686.83 | 1001.08  | -4.68179          |                      |
| -2.3855                     | 2.2982E-06  | 1547.8  | 569.075  | -2.71985          | 3.20845E-10 | 3143.9  | 737.3    | -4.26407          |                      |
|                             | 0.000026079 | 1654.43 | 668.925  | -2.47326          | 2.84153E-07 | 5366.5  | 1388.55  | -3.86482          |                      |
|                             | 0.000244453 | 575.425 | 183.1    | -3.14268          |             |         |          |                   |                      |
|                             | 3.97464E-10 | 2565.05 | 7348.68  | 2.86492           | 8.64045E-11 | 2427.55 | 7343.38  | 3.02501           |                      |
|                             |             |         |          |                   | 1.77428E-07 | 2453.73 | 10787.3  | 4.39629           |                      |
|                             |             |         |          |                   | 0.000173397 | 1191.03 | #DIV/0!  | #DIV/0!           |                      |
|                             | 2.08831E-06 | 1441.13 | 529.2    | -2.72321          | 3.81383E-07 | 2780.25 | 630.3    | -4.41099          |                      |
|                             | 4.26019E-07 | 2032.2  | 683.1    | -2.97497          | 1.10811E-07 | 3055.43 | 1024.78  | -2.98156          |                      |
|                             |             |         |          |                   | 0.00135648  | 946.175 | 352.5    | -2.68418          |                      |
|                             |             |         |          |                   | 0.00288253  | #DIV/0! | 594.2    | #DIV/0!           |                      |
| -2.0861                     |             |         |          |                   |             |         |          |                   |                      |
| -2.277                      | 8.3009E-06  | 28250.6 | 10123.4  | -2.79063          |             |         |          |                   |                      |
| -2.2804                     | 6.76308E-06 | 16597.8 | 7076.88  | -2.34535          |             |         |          |                   |                      |
| -2.9117                     |             |         |          |                   |             |         |          |                   |                      |
| -2.6519                     |             |         |          |                   |             |         |          |                   |                      |
|                             |             |         |          |                   | 1.47634E-06 | 2841.4  | 8220.8   | 2.89322           |                      |
|                             | 0.000189527 | 14414.7 | 30100.4  | 2.08818           | 3.79449E-13 | 3880.38 | 24163.6  | 6.22712           |                      |
|                             |             |         |          |                   | 6.25536E-05 | 2266.15 | 827.967  | -2.73701          |                      |
|                             | 2.75817E-07 | 1290.55 | 496.925  | -2.59707          | 0.000680705 | #DIV/0! | 946.633  | #DIV/0!           |                      |
|                             | 2.04605E-08 | 978.525 | 279.9    | -3.49598          |             |         |          |                   |                      |
| -3.3827                     | 1.03045E-05 | 1767.55 | 729.375  | -2.42338          | 2.16746E-07 | 2544.5  | 796.825  | -3.1933           |                      |
|                             |             |         |          |                   | 4.98069E-05 | 1634.58 | 324.133  | -5.04291          |                      |
|                             |             |         |          |                   | 1.1238E-07  | #DIV/0! | 3051.63  | #DIV/0!           |                      |
|                             |             |         |          |                   | 1.90466E-07 | 5122.45 | 14199.8  | 2.77208           |                      |
|                             |             |         |          |                   | 1.27572E-06 | 2679.35 | 7659.23  | 2.85861           |                      |
|                             | 4.52329E-07 | 637.8   | #DIV/0!  | #DIV/0!           |             |         |          |                   |                      |
|                             | 0.000100612 | 1301.2  | 405.675  | -3.20749          | 0.000854862 | 1896.38 | 658.35   | -2.8805           |                      |
|                             | 2.05972E-05 | 673.433 | #DIV/0!  | #DIV/0!           |             |         |          |                   |                      |
|                             | 0.000117468 | 1074.78 | 339.767  | -3.16327          |             |         |          |                   |                      |
| 2.39633                     | 9.2973E-10  | 1392.05 | 6238.03  | 4.48118           | 6.11659E-09 | 2213.33 | 8455.5   | 3.82027           |                      |
|                             |             |         |          |                   | 2.7756E-12  | 3252.78 | 7340.05  | 2.25655           |                      |
|                             |             |         |          |                   | 1.75337E-05 | #DIV/0! | 2148.2   | #DIV/0!           |                      |
|                             | 1.69849E-05 | 3778.78 | 7791.75  | 2.06198           | 4.85077E-09 | 2866.53 | 7971.8   | 2.781             |                      |
| 2.17772                     | 1.69234E-05 | 705.367 | 2005.7   | 2.84349           |             |         |          |                   |                      |

|         |             |         |         |          |             |         |         |          |
|---------|-------------|---------|---------|----------|-------------|---------|---------|----------|
|         | 0.000167119 | 760.133 | 193.05  | -3.93749 | 2.87741E-05 | 1621.78 | 483.667 | -3.35308 |
|         |             |         |         |          | 0.0219347   | #DIV/0! | 1151.37 | #DIV/0!  |
|         |             |         |         |          | 0.00205473  | 1298.77 | 520.8   | -2.49379 |
|         | 0.00322927  | 548.125 | 219     | -2.50285 |             |         |         |          |
| 5.80007 |             |         |         |          | 0.000475065 | 1152.77 | 477.6   | -2.41367 |
|         | 1.41045E-05 | 1544.45 | 768.4   | -2.00996 | 1.36655E-07 | 2125.13 | 927.95  | -2.29013 |
| -2.5886 | 0.000744541 | 2447.13 | 1075.15 | -2.27608 |             |         |         |          |
|         | 7.56341E-06 | 1123.7  | 559.2   | -2.00948 |             |         |         |          |
|         | 2.03894E-08 | 5439.93 | 21247.3 | 3.90581  | 2.67725E-11 | 2724.7  | 14987   | 5.50042  |
| 2.84487 | 0.000430155 | 816.9   | 1993.53 | 2.44035  |             |         |         |          |
|         |             |         |         |          | 3.64043E-06 | 1775.7  | 627.6   | -2.82935 |
| #DIV/0! | 3.54401E-08 | 2750.7  | 468.2   | -5.87505 |             |         |         |          |
|         | 0.000182074 | 1486.97 | #DIV/0! | #DIV/0!  | 0.000523602 | 2581.37 | 1058.77 | -2.43809 |
|         | 5.27966E-07 | 984.05  | 411.725 | -2.39007 | 2.94189E-07 | 1594.95 | 527.675 | -3.0226  |
|         | 0.00804148  | 717.133 | 206.4   | -3.47448 |             |         |         |          |
|         | 8.4696E-06  | 20479.6 | 46968.3 | 2.29342  | 4.15306E-08 | 10117.4 | 30574.1 | 3.02193  |
|         | 2.15733E-07 | 13100.2 | 37868.9 | 2.89072  | 4.08253E-09 | 5966.63 | 23498.6 | 3.93834  |
|         | 0.000031259 | 1324.3  | 518.15  | -2.55582 | 9.95365E-06 | 1435.3  | 533.925 | -2.68821 |
| -2.2658 | 8.07819E-06 | 2213.88 | 901.1   | -2.45686 | 1.00802E-05 | 2962.6  | 1249.1  | -2.37179 |
|         |             |         |         |          | 0.000257098 | 1919.05 | 13612   | 7.09311  |
| -2.8265 | 9.91644E-06 | 851.325 | 328.25  | -2.59353 | 3.4114E-06  | 1113.53 | 422.825 | -2.63354 |
|         |             |         |         |          | 2.49256E-07 | 1673.9  | 524.7   | -3.1902  |
| -2.275  |             |         |         |          |             |         |         |          |
|         |             |         |         |          | 9.79449E-09 | 5240.5  | 11699.3 | 2.23248  |
|         |             |         |         |          | 9.74515E-11 | 2858.05 | 6155.93 | 2.15389  |
| 2.68578 | 5.75901E-06 | 3259.93 | 9458.73 | 2.90152  | 9.34265E-09 | 3303.88 | 13915.4 | 4.21184  |
|         |             |         |         |          | 0.00019334  | 2130.9  | 518.2   | -4.11212 |
|         |             |         |         |          | 0.000489608 | 2358.38 | 755.267 | -3.12257 |
|         |             |         |         |          | 0.000895357 | 1075.83 | #DIV/0! | #DIV/0!  |
|         |             |         |         |          | 0.000314909 | 1198.28 | 2441.65 | 2.03764  |
|         | 1.51141E-05 | 1236.1  | 468.567 | -2.63805 | 1.64049E-06 | 2910.33 | 784.3   | -3.71073 |
|         |             |         |         |          | 7.28735E-06 | 1410.93 | 3741.8  | 2.65202  |
|         |             |         |         |          | 0.000589002 | #DIV/0! | 1311.93 | #DIV/0!  |
|         |             |         |         |          | 0.00346726  | 1388.63 | 411.85  | -3.37168 |
|         |             |         |         |          | 0.00180241  | 1111.33 | #DIV/0! | #DIV/0!  |
|         | 1.10375E-07 | 1674.38 | 660.575 | -2.53472 |             |         |         |          |
|         |             |         |         |          | 0.000805003 | 914.867 | 310.9   | -2.94264 |
|         |             |         |         |          | 0.00195466  | 848.925 | 266     | -3.19145 |
| -2.0253 | 9.90652E-06 | 927.925 | 355.967 | -2.60677 | 1.52722E-05 | 1209.55 | 465.5   | -2.59839 |
| 2.55165 | 4.17905E-11 | 2609.98 | 20926.2 | 8.01776  | 4.70729E-13 | 1968    | 19778.3 | 10.0499  |
| 3.21449 | 1.36512E-08 | 952     | 3975.5  | 4.17595  | 1.02153E-05 | #DIV/0! | 3543.33 | #DIV/0!  |
| 2.57865 |             |         |         |          |             |         |         |          |
|         |             |         |         |          | 0.00145245  | 3036.38 | 842.75  | -3.60294 |
|         |             |         |         |          | 0.0108651   | 1311.75 | 601.45  | -2.18098 |
|         | 0.00443118  | 1230.25 | 365.675 | -3.36433 | 0.000483871 | 3968.38 | 982.475 | -4.03916 |
|         |             |         |         |          | 0.0126991   | 1232.8  | 392.55  | -3.14049 |
|         | 0.000105595 | 1043.48 | 272.475 | -3.82962 | 5.03838E-05 | 2435.28 | 626.25  | -3.88866 |
|         | 0.00151161  | 781.4   | #DIV/0! | #DIV/0!  | 0.000423715 | 2406.2  | 822.5   | -2.92547 |
|         |             |         |         |          | 2.86045E-05 | 1102.9  | #DIV/0! | #DIV/0!  |
|         | 0.00105866  | 621.1   | #DIV/0! | #DIV/0!  | 0.00116162  | 1475.63 | 545.25  | -2.70633 |
|         | 7.91437E-06 | 889.725 | 310.033 | -2.86977 | 7.09782E-07 | 1581.25 | 571.167 | -2.76846 |
|         |             |         |         |          | 0.00127653  | 973.233 | #DIV/0! | #DIV/0!  |
|         | 0.0007207   | 524.15  | 98.6    | -5.31592 |             |         |         |          |
|         | 9.42079E-06 | 719.933 | #DIV/0! | #DIV/0!  | 0.000123519 | 1215.9  | 377.8   | -3.21837 |
|         | 0.00132026  | 572.267 | 164.7   | -3.4746  |             |         |         |          |
| 52.5814 | 2.73495E-13 | 1618.85 | 80780.8 | 49.9001  | 2.70832E-11 | 6253.58 | 136427  | 21.8158  |
|         |             |         |         |          | 4.20701E-05 | 5368.83 | 1999.93 | -2.68451 |
|         |             |         |         |          | 4.90657E-05 | 1556.77 | 391.85  | -3.97286 |
|         | 0.0017844   | 2794.65 | 1207.8  | -2.31384 | 0.00231061  | 4001.08 | 1902.75 | -2.10279 |
| -3.6746 | 3.31481E-08 | 6731.15 | 1935.6  | -3.47755 | 0.000027229 | 5510.13 | 2512.63 | -2.19298 |
| -3.7239 | 1.2425E-11  | 5882.13 | 1542.8  | -3.81263 | 6.66347E-07 | 4702.8  | 2174.65 | -2.16255 |



|         |             |         |         |          |             |         |         |          |
|---------|-------------|---------|---------|----------|-------------|---------|---------|----------|
|         | 1.49869E-09 | 18496.3 | 43594.8 | 2.35695  | 1.44489E-20 | 5378.28 | 34856.4 | 6.48096  |
|         | 4.95818E-09 | 7463.43 | 18385.4 | 2.46339  | 7.26985E-14 | 5497.75 | 20454   | 3.72043  |
|         |             |         |         |          | 0.004252    | 744.3   | 279.467 | -2.66329 |
| -2.2404 |             |         |         |          |             |         |         |          |
| 3.64682 | 2.48109E-14 | 5845.43 | 88843.6 | 15.1988  | 5.03957E-17 | 6321.85 | 140828  | 22.2765  |
| -2.0277 | 5.25593E-08 | 1927.55 | 813.55  | -2.36931 | 2.02343E-07 | 1553.88 | 715.825 | -2.17075 |
| 5.62621 | 8.45824E-11 | 3857.75 | 18551.8 | 4.80897  | 1.99178E-12 | 2546.83 | 16008.1 | 6.2855   |
|         |             |         |         |          | 0.0219384   | #DIV/0! | 1928.05 | #DIV/0!  |
| -3.1453 | 4.21157E-09 | 5500.05 | 1035.9  | -5.30944 | 1.85245E-07 | 7645.6  | 1829.3  | -4.17952 |
|         | 7.98947E-07 | 2354.53 | 6692.73 | 2.84249  |             |         |         |          |
| 2.1994  |             |         |         |          | 1.59443E-14 | 2141.28 | 7082.6  | 3.30766  |
|         | 0.000112163 | 1185.18 | 393.45  | -3.01226 | 7.01824E-07 | 2385.2  | 627.55  | -3.80081 |
|         |             |         |         |          | 4.04228E-05 | 1782.85 | 4550    | 2.55209  |
|         |             |         |         |          | 6.55225E-13 | 3011.93 | 6428.13 | 2.13422  |
|         | 1.69064E-06 | 2205.45 | 935.375 | -2.35782 |             |         |         |          |
| -2.3035 | 0.00122538  | 9189.78 | 3903.3  | -2.35436 | 0.000249585 | 2060.95 | 635.133 | -3.24491 |
|         | 0.00824863  | 729.675 | 251.867 | -2.89707 | 1.08156E-08 | 5273.5  | 1685.98 | -3.12786 |
|         |             |         |         |          | 9.95962E-07 | 7765.78 | 18346   | 2.36242  |
|         | 1.4673E-06  | 5810.58 | 12584.2 | 2.16574  | 3.58677E-12 | 2699.98 | 9643.95 | 3.57187  |
|         |             |         |         |          | 3.97094E-07 | #DIV/0! | 1059.2  | #DIV/0!  |
|         |             |         |         |          | 0.00536139  | #DIV/0! | 991.675 | #DIV/0!  |
|         | 0.00335958  | 2635.08 | 1216.98 | -2.16527 |             |         |         |          |
|         |             |         |         |          | 1.3236E-08  | 4042.48 | 9025.73 | 2.23272  |
|         | 0.000089351 | 1102.13 | 464.467 | -2.37288 | 3.50139E-10 | 2279.63 | 724.85  | -3.14496 |
|         |             |         |         |          | 0.000386236 | 762.4   | #DIV/0! | #DIV/0!  |
|         |             |         |         |          | 0.0107567   | 1345.1  | 431.55  | -3.1169  |
| -2.2553 |             |         |         |          |             |         |         |          |
| -2.445  | 8.1539E-09  | 3686.15 | 1235.18 | -2.98431 | 3.71241E-10 | 6357.13 | 1742.05 | -3.64922 |
|         | 0.0017471   | 724.6   | 356.833 | -2.03064 |             |         |         |          |
|         | 0.0116939   | 665.433 | 193.55  | -3.43804 |             |         |         |          |
|         | 0.0137092   | 596.15  | 257.975 | -2.31088 |             |         |         |          |
| 14.6056 | 6.75449E-16 | #DIV/0! | 14559.9 | #DIV/0!  | 1.51193E-13 | 3191.7  | 16659.1 | 5.21949  |
|         | 1.01306E-06 | 1277.93 | 450.45  | -2.837   | 5.77869E-10 | 2211.75 | 512.825 | -4.31287 |
|         |             |         |         |          | 0.000218082 | 1236.03 | #DIV/0! | #DIV/0!  |
|         |             |         |         |          | 3.21603E-07 | 4359.88 | 10556.6 | 2.42131  |
|         | 4.02905E-05 | 571.75  | 261.2   | -2.18894 | 8.43237E-05 | 968.625 | 339.7   | -2.85141 |
|         | 1.43858E-06 | 2826.75 | 8455.3  | 2.99117  | 2.32422E-05 | 2721.85 | 5877.3  | 2.1593   |
|         | 3.82277E-05 | 4227.05 | 10178.2 | 2.40787  | 7.39447E-05 | 3489.85 | 8185.33 | 2.34547  |
|         |             |         |         |          | 0.000141085 | 2658.08 | 1304.25 | -2.03801 |
|         | 0.0091882   | 1419.07 | 684.8   | -2.07224 |             |         |         |          |
|         |             |         |         |          | 0.00127864  | 2888.05 | 7081.65 | 2.45205  |
|         | 0.00021506  | 811.6   | 404.9   | -2.00445 | 0.000236857 | 1522.75 | 624.9   | -2.43679 |
|         |             |         |         |          | 4.65401E-09 | 6212.45 | 12789.1 | 2.05862  |
|         | 0.00674358  | 854.35  | 305.133 | -2.79992 | 0.0010021   | 1978.45 | 342.85  | -5.7706  |
|         | 8.90637E-06 | 1686.93 | 512.4   | -3.2922  | 4.84277E-05 | 1707.33 | #DIV/0! | #DIV/0!  |
|         | 0.00015515  | 2110.15 | 641.2   | -3.29094 | 0.000320009 | 2088.57 | 917.8   | -2.27562 |
|         |             |         |         |          | 0.000245351 | 1329.48 | 473.6   | -2.80717 |
| 2.51708 | 4.49944E-10 | 2937.6  | 9872.8  | 3.36084  | 4.14242E-11 | 2590.73 | 8849.78 | 3.41595  |
| 3.05023 | 1.44232E-10 | 2402.93 | 9574.35 | 3.98446  | 1.59175E-10 | 1990.58 | 7258.85 | 3.64661  |
|         | 2.04284E-07 | 3563.65 | 1436.85 | -2.48018 | 1.9208E-10  | 5981.23 | 1589.68 | -3.76255 |
| -2.3735 | 0.000066669 | 861.05  | 397.925 | -2.16385 | 1.40304E-06 | 1677.7  | 564.25  | -2.97333 |
| #DIV/0! | 0.0010734   | #DIV/0! | 4400.43 | #DIV/0!  | 2.04816E-05 | #DIV/0! | 8766.13 | #DIV/0!  |
| #DIV/0! |             |         |         |          | 0.00060502  | 1704.8  | 3718.1  | 2.18096  |
|         |             |         |         |          | 0.00495677  | 1700.4  | 3724.5  | 2.19037  |
|         | 5.97582E-07 | 1527.8  | 4419.25 | 2.89256  | 2.56859E-07 | 1648.55 | 4361.23 | 2.64549  |
| 2.51718 | 9.95997E-05 | 2670.3  | 5385.63 | 2.01686  | 2.47765E-10 | 2249.08 | 8758.48 | 3.89426  |
|         | 0.000695015 | 1930.88 | 4205.98 | 2.17827  | 7.68327E-12 | 844.5   | 5581.38 | 6.60909  |
|         |             |         |         |          | 3.09316E-06 | 4060    | 1864.05 | -2.17805 |
|         | 0.000898794 | 983.3   | 431.95  | -2.27642 |             |         |         |          |
|         | 6.68535E-05 | 3394.73 | 1653.88 | -2.05259 | 5.87382E-06 | 3746.6  | 1631.5  | -2.29641 |
|         | 0.00152703  | 3787.7  | 1881.43 | -2.01321 |             |         |         |          |
|         |             |         |         |          | 0.00531837  | 1214.38 | 543.85  | -2.23292 |

|         |             |         |         |          |             |         |         |          |  |
|---------|-------------|---------|---------|----------|-------------|---------|---------|----------|--|
|         |             |         |         |          | 2.11201E-05 | 3635.73 | 766.45  | -4.74359 |  |
|         | 0.00138933  | 970.767 | 457.433 | -2.1222  | 0.00019709  | 1614.53 | 673.2   | -2.3983  |  |
|         | 0.00168066  | 1824.58 | 4740.13 | 2.59793  | 0.0013822   | 1983.95 | 4615.58 | 2.32646  |  |
|         | 0.00140171  | 1659.27 | #DIV/0! | #DIV/0!  | 0.00018039  | 3250.3  | 1289.45 | -2.52069 |  |
|         |             |         |         |          | 0.00972068  | 561.233 | #DIV/0! | #DIV/0!  |  |
|         |             |         |         |          | 2.77111E-05 | 1531.53 | 454.533 | -3.36944 |  |
|         |             |         |         |          | 0.00582148  | 1493.7  | 596.8   | -2.50285 |  |
|         |             |         |         |          | 7.28338E-05 | 1195.2  | 575.1   | -2.07825 |  |
| 2.01929 | 9.06531E-06 | 2862.08 | 8806.45 | 3.07695  |             |         |         |          |  |
| -2.4605 | 2.15679E-08 | 3079.23 | 814.625 | -3.77993 | 2.17043E-08 | 3011.18 | 868.95  | -3.4653  |  |
|         | 0.00165356  | 706.925 | #DIV/0! | #DIV/0!  | 0.00124547  | 1621.15 | 716.9   | -2.26133 |  |
| -2.823  | 0.00207702  | 1203.93 | 492.633 | -2.44386 |             |         |         |          |  |
|         |             |         |         |          | 0.00116473  | 5327.68 | 2272.15 | -2.34477 |  |
|         | 0.000543273 | 823.225 | 273.65  | -3.00831 | 2.35495E-06 | 1565.58 | 450.5   | -3.47519 |  |
| -3.9018 | 3.21408E-07 | 1064.63 | 262.6   | -4.05417 |             |         |         |          |  |
| #DIV/0! | 4.12266E-06 | 1712.17 | 516.5   | -3.31494 |             |         |         |          |  |
|         | 0.00254286  | 1267.9  | #DIV/0! | #DIV/0!  |             |         |         |          |  |
| 3.29848 | 1.59988E-08 | 3265.95 | 23608.3 | 7.22862  | 4.73619E-15 | 4066    | 27050.2 | 6.65277  |  |
| 2.04353 | 3.20473E-07 | 31231.7 | 104479  | 3.3453   | 3.8071E-14  | 20479.9 | 151803  | 7.41228  |  |
| 2.00874 | 5.21638E-07 | 30160.2 | 100740  | 3.34016  | 3.0651E-14  | 18869.9 | 147525  | 7.818    |  |
| 31.9736 | 1.48718E-12 | #DIV/0! | 36998.2 | #DIV/0!  | 5.04004E-12 | 6459.1  | 37684   | 5.83425  |  |
|         |             |         |         |          | 0.0022615   | 1050.35 | 251.1   | -4.18299 |  |
|         |             |         |         |          | 0.0033618   | 1641.5  | 609.4   | -2.69363 |  |
|         |             |         |         |          | 0.0117997   | 662.125 | 326.275 | -2.02935 |  |
|         |             |         |         |          | 0.0132201   | #DIV/0! | 996.367 | #DIV/0!  |  |
|         | 7.39139E-11 | 5835.93 | 15097.6 | 2.58701  | 4.13101E-14 | 5311.03 | 16619.4 | 3.12922  |  |
|         |             |         |         |          |             |         |         |          |  |
|         |             |         |         |          | 1.76534E-07 | #DIV/0! | 1539.7  | #DIV/0!  |  |
|         |             |         |         |          | 0.00494892  | #DIV/0! | 959.2   | #DIV/0!  |  |
|         |             |         |         |          | 0.00028203  | 718.1   | 285     | -2.51965 |  |
|         | 1.72217E-05 | 6782.15 | 2878.53 | -2.35612 |             |         |         |          |  |
|         |             |         |         |          | 5.55878E-05 | 3241.48 | 6631.63 | 2.04587  |  |
|         | 2.50899E-05 | 45739   | 102470  | 2.24032  | 1.35736E-09 | 37071.4 | 125362  | 3.38163  |  |
|         | 5.11298E-05 | 821.45  | 336.067 | -2.44431 | 0.000907588 | 1035.13 | 397.5   | -2.60409 |  |
|         |             |         |         |          | 0.00586212  | 735     | 189.5   | -3.87863 |  |
|         | 4.47854E-06 | 1246.25 | 531.75  | -2.34368 |             |         |         |          |  |
| 2.17722 |             |         |         |          | 0.000247772 | 2163    | 1056.93 | -2.0465  |  |
| #DIV/0! | 7.42966E-06 | 1182.57 | #DIV/0! | #DIV/0!  | 0.000146232 | 2338.68 | 948.5   | -2.46566 |  |
|         |             |         |         |          | 0.00146792  | 887.25  | 313.9   | -2.82654 |  |
| -2.6692 | 0.000121792 | 11999.5 | 5647.95 | -2.12458 |             |         |         |          |  |
| -2.1274 | 5.75321E-05 | 15615.5 | 7773.3  | -2.00887 |             |         |         |          |  |
| 2.31529 | 2.46941E-09 | 1579.5  | 5700.18 | 3.60885  | 4.12213E-15 | #DIV/0! | 5237.6  | #DIV/0!  |  |
|         |             |         |         |          | 0.00267395  | 1267.13 | 457.633 | -2.76887 |  |
|         | 8.99105E-05 | 1128.68 | 495.525 | -2.27774 | 7.21061E-06 | 2166.18 | 856.8   | -2.52822 |  |
| 3.94682 | 4.88306E-09 | 738.4   | 4434.35 | 6.00535  | 7.80195E-09 | 1761.2  | 5477.43 | 3.11005  |  |
| 2.7923  | 6.95336E-12 | 9290.85 | 41040.4 | 4.41729  | 2.14125E-15 | 8404.8  | 62157.3 | 7.39545  |  |
|         | 8.84411E-05 | 1750.38 | 649.725 | -2.69402 | 4.00775E-05 | 2183    | 944.3   | -2.31177 |  |
|         | 6.58484E-07 | 6004.73 | 2640.73 | -2.27389 | 1.02168E-06 | 8043.73 | 3846.58 | -2.09114 |  |
|         |             |         |         |          | 0.000001882 | 1026.78 | 270.7   | -3.79304 |  |
|         |             |         |         |          |             |         |         |          |  |
|         | 0.0154828   | 795.45  | 313.3   | -2.53894 |             |         |         |          |  |
| -2.0312 |             |         |         |          |             |         |         |          |  |
| -2.3834 |             |         |         |          |             |         |         |          |  |
| -2.3922 | 5.48727E-07 | 2400.15 | 952.267 | -2.52046 | 1.82789E-05 | 2208.73 | 1003.3  | -2.20146 |  |
| -3.5221 | 1.17157E-08 | 1628.63 | 417.5   | -3.9009  | 3.40861E-09 | 2215.48 | 408.25  | -5.42676 |  |
| -2.9487 | 7.55001E-07 | 1776.98 | 468.4   | -3.79371 | 1.12905E-05 | 2300.25 | 730.533 | -3.14873 |  |
|         | 0.00517678  | 586.9   | 217.8   | -2.69467 | 0.000382012 | 1630.83 | #DIV/0! | #DIV/0!  |  |
|         | 4.93531E-06 | 2288.5  | 855.233 | -2.67588 | 7.97488E-07 | 3961.28 | 1370.23 | -2.89097 |  |
|         | 0.00551061  | 511.425 | 105.75  | -4.83617 | 0.00446797  | 1412.23 | 408.45  | -3.45752 |  |
|         | 0.00120464  | 576.4   | 234.567 | -2.4573  | 2.35136E-06 | 1542.03 | 363.633 | -4.2406  |  |
|         |             |         |         |          | 0.00770056  | 1204.25 | 382.9   | -3.14508 |  |
|         | 0.0099403   | 744.9   | 204.4   | -3.64432 |             |         |         |          |  |



|         |             |         |         |          |             |         |         |          |
|---------|-------------|---------|---------|----------|-------------|---------|---------|----------|
|         | 0.0011792   | #DIV/0! | 824.8   | #DIV/0!  |             |         |         |          |
|         |             |         |         |          | 2.28385E-12 | #DIV/0! | 879.075 | #DIV/0!  |
|         |             |         |         |          | 0.0212181   | #DIV/0! | 2323.9  | #DIV/0!  |
|         |             |         |         |          | 5.72268E-07 | 3619.4  | 1228.08 | -2.94721 |
|         |             |         |         |          | 5.18723E-08 | #DIV/0! | 9813.93 | #DIV/0!  |
|         |             |         |         |          | 0.0010632   | #DIV/0! | 3158.13 | #DIV/0!  |
| -2.0038 |             |         |         |          | 0.00120082  | 1254.1  | 595.4   | -2.10632 |
|         | 3.60785E-13 | 16480   | 34483.9 | 2.09247  | 9.99273E-17 | 13702   | 36302.5 | 2.64944  |
|         |             |         |         |          | 0.000533204 | #DIV/0! | 613.425 | #DIV/0!  |
|         | 5.07964E-08 | 3891.58 | 8770.78 | 2.25379  |             |         |         |          |
|         |             |         |         |          | 2.27911E-07 | 2281.5  | 1041.25 | -2.19112 |
|         |             |         |         |          | 0.0213377   | #DIV/0! | 697.675 | #DIV/0!  |
|         | 6.86616E-05 | 2727.03 | 5598.9  | 2.05312  | 1.98806E-10 | 1909.23 | 7344.1  | 3.84664  |
|         | 1.35481E-05 | 609     | 1735.08 | 2.84906  | 6.41317E-09 | #DIV/0! | 2168    | #DIV/0!  |
|         |             |         |         |          | 0.001141    | #DIV/0! | 2244.23 | #DIV/0!  |
|         | 0.000282971 | 536.05  | 168.45  | -3.18225 | 0.01944     | 896.1   | 410.3   | -2.18401 |
| -2.0538 |             |         |         |          |             |         |         |          |
|         |             |         |         |          | 6.29309E-06 | 1509.25 | 409.7   | -3.68379 |
| -2.1342 | 2.8582E-09  | 2294.45 | 740.575 | -3.0982  | 1.01162E-07 | 2699.38 | 1047.25 | -2.57758 |
|         |             |         |         |          | 6.8701E-08  | 2181.73 | 854.075 | -2.55449 |
|         | 1.56303E-06 | 873.55  | 392.567 | -2.22523 |             |         |         |          |
| -2.4064 | 3.17073E-06 | 2667.23 | 1068.65 | -2.49588 |             |         |         |          |
|         | 5.57919E-08 | 6192.53 | 25693.1 | 4.14905  | 7.89214E-13 | 5488.2  | 24845.3 | 4.52703  |
|         | 1.43109E-05 | 11456   | 31464.5 | 2.74656  | 7.82169E-12 | 5079.25 | 30754.7 | 6.05496  |
|         | 9.02301E-07 | 12019.3 | 33677.3 | 2.80194  | 9.59649E-14 | 4353.25 | 31285.7 | 7.18675  |
|         | 0.00133432  | 4264.73 | 9806.95 | 2.29955  |             |         |         |          |
|         | 0.000113152 | 7229.4  | 17165.1 | 2.37434  |             |         |         |          |
|         | 0.000105117 | 6473.55 | 15487.8 | 2.39247  |             |         |         |          |
|         | 6.35591E-10 | 7764.45 | 26667.1 | 3.43452  | 3.65817E-16 | 3763.58 | 28437.1 | 7.55586  |
|         | 0.00315673  | 954.8   | #DIV/0! | #DIV/0!  |             |         |         |          |
|         | 3.04402E-06 | 1525.5  | 508.125 | -3.00221 | 0.000650641 | 2069.5  | 944.133 | -2.19196 |
|         |             |         |         |          | 1.47441E-05 | 2530.5  | 972.4   | -2.60232 |
|         |             |         |         |          | 0.000288103 | 1851.78 | 783.933 | -2.36216 |
|         | 0.00305287  | 3143.6  | 1329.9  | -2.36379 | 0.000487058 | 4495.83 | 1340    | -3.3551  |
|         | 0.000275398 | 811.075 | 375.967 | -2.15731 | 0.000262725 | 1485.98 | 503.1   | -2.95364 |
|         | 1.65328E-05 | 4097.98 | 1288.8  | -3.17968 | 0.000106281 | 3625.8  | 1226.43 | -2.9564  |
| -3.3907 | 0.00614995  | 1595.9  | 674.675 | -2.36544 | 0.00725564  | 1430    | 537.2   | -2.66195 |
|         | 0.00017223  | 2173.13 | 986.05  | -2.20388 |             |         |         |          |
|         | 8.42216E-05 | 878.125 | 427.5   | -2.05409 |             |         |         |          |
|         |             |         |         |          | 6.42598E-05 | 3566.85 | 1324.78 | -2.69242 |
|         | 1.27267E-07 | 2573.23 | 838.6   | -3.06848 | 0.00001274  | 3485.6  | 1475.45 | -2.3624  |
|         |             |         |         |          | 3.78073E-07 | 1219.58 | 2482.23 | 2.03532  |
|         |             |         |         |          | 1.55597E-08 | 1642.3  | 705.1   | -2.32917 |
|         | 4.43079E-05 | 997.767 | 496.525 | -2.0095  |             |         |         |          |
|         |             |         |         |          | 0.000805321 | 1091.9  | 343.1   | -3.18245 |
|         |             |         |         |          | 2.98875E-11 | 17006.9 | 79174.1 | 4.65543  |
|         | 8.69885E-09 | 5984.95 | 13446.8 | 2.24677  | 7.63697E-16 | 3731.05 | 17143.4 | 4.5948   |
|         | 0.00185968  | 874.35  | #DIV/0! | #DIV/0!  | 0.00278028  | 1702.95 | 608.167 | -2.80014 |
|         |             |         |         |          | 6.86885E-11 | 1477.7  | 4022.05 | 2.72183  |
|         |             |         |         |          | 2.11376E-10 | 1596.73 | 4753.43 | 2.97698  |
|         | 1.03383E-09 | 32087.2 | 70233   | 2.18882  | 2.06658E-19 | 14540.6 | 79198.7 | 5.44675  |
|         | 5.00417E-07 | 15003.5 | 31552.2 | 2.10298  | 2.2039E-16  | 6586.88 | 37812   | 5.74051  |
|         |             |         |         |          | 2.53603E-09 | #DIV/0! | 4050.88 | #DIV/0!  |
|         |             |         |         |          | 0.000101753 | #DIV/0! | 1845.28 | #DIV/0!  |
|         | 6.3978E-09  | 15061.6 | 33415.6 | 2.2186   | 4.21432E-18 | 7596.25 | 42769.5 | 5.63034  |
|         | 1.26089E-09 | 7957.88 | 25834.7 | 3.24643  | 3.2969E-16  | 4377.08 | 33138.9 | 7.57101  |
|         | 0.000742238 | #DIV/0! | 2611.28 | #DIV/0!  |             |         |         |          |
|         |             |         |         |          | 7.38595E-08 | #DIV/0! | 1505.3  | #DIV/0!  |
| 2.03968 | 1.08672E-07 | 7610.28 | 25124.4 | 3.30138  | 5.11668E-14 | 3567.05 | 24685.1 | 6.92031  |
|         |             |         |         |          | 4.09455E-06 | 1959.43 | 5834.75 | 2.97779  |
|         |             |         |         |          | 2.17078E-07 | #DIV/0! | 1057.9  | #DIV/0!  |
|         | 6.48066E-06 | 3873.95 | 8342.8  | 2.15356  | 1.26435E-09 | 2464.18 | 8167.18 | 3.31436  |

|         |             |         |         |          |             |         |         |          |
|---------|-------------|---------|---------|----------|-------------|---------|---------|----------|
|         |             |         |         |          | 4.89346E-18 | 5773.38 | 24330.8 | 4.21432  |
|         | 0.00473147  | #DIV/0! | 2187.17 | #DIV/0!  | 1.04889E-07 | #DIV/0! | 3130.07 | #DIV/0!  |
| 9.01322 | 0.000518845 | 2214.48 | 8704.53 | 3.93074  |             |         |         |          |
|         |             |         |         |          | 1.00872E-05 | #DIV/0! | 1272.07 | #DIV/0!  |
| -2.5337 | 9.72786E-07 | 9281.1  | 3489.33 | -2.65986 |             |         |         |          |
|         | 0.00122821  | 867.167 | 1853    | 2.13684  | 3.47836E-08 | 1038.37 | 3655.4  | 3.52034  |
| -2.8155 | 5.55217E-06 | 26374.6 | 10582.9 | -2.49219 |             |         |         |          |
|         | 0.000416131 | 3373.28 | 8502.1  | 2.52043  | 4.38854E-05 | 2659.58 | 7450.58 | 2.80142  |
|         | 0.000408145 | 2417.18 | 6511.8  | 2.69397  | 1.22279E-07 | 1283.05 | 6330.13 | 4.93365  |
|         |             |         |         |          | 0.000534407 | #DIV/0! | 2275.5  | #DIV/0!  |
|         |             |         |         |          | 9.56256E-08 | 14372.9 | 42091.3 | 2.92853  |
|         |             |         |         |          | 1.2824E-07  | 14377.2 | 43752.9 | 3.04321  |
|         |             |         |         |          | 4.67507E-08 | 1586.68 | 3904.35 | 2.46071  |
|         | 6.81931E-14 | 4838.08 | 18370.6 | 3.79708  | 7.96636E-17 | 2781.13 | 15385.2 | 5.53199  |
|         |             |         |         |          | 2.85043E-06 | #DIV/0! | 3779.07 | #DIV/0!  |
| -2.0418 | 7.98149E-06 | 8729.83 | 3981.9  | -2.19238 |             |         |         |          |
|         | 0.00664305  | 1029.93 | 361.3   | -2.85061 | 0.00319596  | 2001.78 | 540.2   | -3.70562 |
|         | 0.000372449 | 1447.23 | 615.975 | -2.34949 | 6.36469E-08 | 3473.78 | 959.867 | -3.61902 |
|         | 0.000202655 | 1309.15 | 434     | -3.01647 | 1.62364E-06 | 2819.78 | 783.4   | -3.59941 |
| 2.09438 | 0.000140197 | 1159    | 2480.3  | 2.14003  | 6.28749E-06 | 921.5   | 2244.78 | 2.436    |
|         | 1.11841E-10 | 3556.43 | 7845.83 | 2.2061   | 9.71702E-13 | 3338.53 | 8222.03 | 2.46277  |
| 2.23904 | 0.000004987 | 698.4   | 2583.35 | 3.69895  | 1.49525E-08 | #DIV/0! | 2142.75 | #DIV/0!  |
| 2.33091 | 9.92786E-06 | 3122.35 | 7886.38 | 2.52578  | 1.52369E-08 | #DIV/0! | 7418.63 | #DIV/0!  |
|         |             |         |         |          | 2.81184E-05 | 3466.88 | 1700.25 | -2.03904 |
| 2.03434 |             |         |         |          |             |         |         |          |
| -4.8864 | 4.30249E-16 | 15293.9 | 1561.03 | -9.79733 | 6.74803E-16 | 11959   | 1388.7  | -8.61162 |
|         |             |         |         |          | 0.00379347  | 1209    | 590.175 | -2.04854 |
|         |             |         |         |          | 1.34557E-07 | 1806.2  | 649.067 | -2.78276 |
|         |             |         |         |          | 0.0189164   | #DIV/0! | 631.933 | #DIV/0!  |
|         |             |         |         |          | 1.90737E-11 | 2087.8  | 6923.45 | 3.31615  |
|         |             |         |         |          | 4.47645E-05 | #DIV/0! | 3451.38 | #DIV/0!  |
|         | 0.000443086 | 1120.77 | 257.225 | -4.35715 | 3.79116E-06 | 1904.08 | 570.7   | -3.33639 |
|         |             |         |         |          | 5.86278E-15 | 2771.1  | 5616.93 | 2.02697  |
| 2.17297 | 8.0923E-12  | 3949.4  | 11791.9 | 2.98574  | 2.2528E-09  | 3951.23 | 8959.28 | 2.26747  |
|         | 6.46789E-10 | 4753.03 | 11785.9 | 2.47967  | 2.66879E-15 | 2155.15 | 8359.63 | 3.87891  |
| 2.00017 | 1.79843E-12 | 3296.7  | 8398.58 | 2.54757  |             |         |         |          |
|         | 0.00081538  | 1592.13 | 759.15  | -2.09725 |             |         |         |          |
|         | 0.00430009  | 1799.63 | 728.25  | -2.47116 | 0.00713014  | 3948.7  | 1608.9  | -2.45429 |
|         | 0.00203582  | 1197.45 | 497.875 | -2.40512 |             |         |         |          |
|         |             |         |         |          | 2.52641E-06 | 1043.97 | #DIV/0! | #DIV/0!  |
|         |             |         |         |          | 9.43019E-05 | 1856.65 | 879.65  | -2.11067 |
| 5.49875 | 9.41217E-12 | 737.2   | 5311.4  | 7.20483  | 1.92657E-08 | #DIV/0! | 2886.65 | #DIV/0!  |
| 4.85074 | 9.04505E-09 | 3697.7  | 15096.3 | 4.08261  |             |         |         |          |
|         | 1.04361E-05 | 5867.7  | 14489.5 | 2.46937  | 4.53912E-08 | 5351.55 | 17779.6 | 3.32233  |
| -2.0984 |             |         |         |          |             |         |         |          |
|         | 4.22461E-06 | 1064.1  | 385.85  | -2.75781 | 7.47649E-06 | 1750.25 | 506.933 | -3.45262 |
| -3.597  | 1.14017E-08 | 10212.5 | 3124.53 | -3.2685  | 1.38091E-06 | 15029   | 5862.15 | -2.56374 |
|         | 0.000123648 | 2079.75 | 4989.18 | 2.39893  | 2.35854E-08 | 1110.1  | 3666.03 | 3.30243  |
|         |             |         |         |          | 3.16619E-07 | 5933.15 | 17719.7 | 2.98655  |
|         | 2.37215E-06 | 5910.68 | 14411   | 2.43813  | 1.42926E-09 | 3743.75 | 13871   | 3.70511  |
|         | 2.97649E-06 | 1980.8  | 606.85  | -3.26407 | 4.02556E-07 | 3851.6  | 1068.83 | -3.60358 |
|         | 5.3579E-07  | 1537.78 | 535.8   | -2.87005 | 5.76255E-06 | 2210.4  | 804.25  | -2.7484  |
|         |             |         |         |          | 0.0065569   | 1416.97 | 427.6   | -3.31377 |
|         |             |         |         |          | 0.0016667   | 1434.33 | 528.5   | -2.71397 |
|         | 2.74587E-06 | 2718.6  | 1310.93 | -2.0738  |             |         |         |          |
| 2.43346 | 3.44212E-16 | 1967.38 | 10155.1 | 5.16174  | 1.50224E-17 | 1634.68 | 9960.38 | 6.09318  |
| 2.34796 | 2.04983E-06 | 2472.4  | 7638.6  | 3.08955  | 8.90511E-11 | 2577.85 | 16998.2 | 6.59393  |
|         | 0.000340656 | #DIV/0! | 1600.07 | #DIV/0!  |             |         |         |          |
|         | 0.00248511  | #DIV/0! | 890.133 | #DIV/0!  |             |         |         |          |

|         |             |         |         |             |             |         |         |          |
|---------|-------------|---------|---------|-------------|-------------|---------|---------|----------|
|         |             |         |         | 8.2823E-08  | #DIV/0!     | 4721.03 | #DIV/0! |          |
|         |             |         |         | 7.85762E-05 | #DIV/0!     | 1959.93 | #DIV/0! |          |
|         |             |         |         | 1.49461E-07 | 37787.7     | 76333.5 | 2.02006 |          |
|         |             |         |         | 6.81573E-11 | 13123.3     | 33090.8 | 2.52154 |          |
|         |             |         |         | 6.6223E-11  | 3413.4      | 8363.68 | 2.45025 |          |
|         |             |         |         | 0.00339183  | #DIV/0!     | 601.1   | #DIV/0! |          |
|         |             |         |         | 2.62673E-09 | 7632.98     | 22150.9 | 2.902   |          |
|         | 8.13949E-08 | 13838.2 | 48561.7 | 3.50926     | 5.20269E-13 | 6333.98 | 40661.5 | 6.41958  |
|         |             |         |         |             | 2.05657E-12 | 5632.85 | 30600   | 5.43242  |
| #DIV/0! |             |         |         |             | 1.61931E-09 | 940.267 | 2724.8  | 2.8979   |
|         |             |         |         |             | 0.00337083  | 2093.48 | 716.85  | -2.92038 |
|         | 0.000707989 | 733.875 | 356.2   | -2.06029    |             |         |         |          |
|         | 1.00908E-05 | 1463.48 | 449.55  | -3.25542    | 1.7714E-06  | 3104.6  | 812     | -3.8234  |
|         |             |         |         |             | 0.00119527  | 1388.88 | 552.775 | -2.51255 |
|         |             |         |         |             | 1.79378E-11 | 49295.4 | 136010  | 2.75908  |
|         |             |         |         |             | 2.28477E-16 | 17763.5 | 78688.9 | 4.4298   |
|         |             |         |         |             | 3.62585E-15 | 20562.7 | 107467  | 5.22631  |
|         | 8.40552E-11 | 18945.7 | 62471.4 | 3.29739     | 5.0851E-18  | 6578.4  | 50126.1 | 7.6198   |
|         |             |         |         |             | 9.58519E-05 | 3876.45 | 915.4   | -4.23471 |
|         | 7.38345E-05 | 4734.45 | 1079.55 | -4.38558    | 0.000035506 | 2987.88 | 755.55  | -3.95457 |
|         | 0.0018417   | 2149.73 | 933.025 | -2.30404    | 0.000273571 | 3355.25 | 1201.85 | -2.79174 |
|         | 0.0120522   | 3015.43 | 1362.17 | -2.2137     |             |         |         |          |
|         | 0.00101215  | 799.333 | 281.6   | -2.83854    | 9.67866E-06 | 1421.75 | 573.65  | -2.47843 |
| 4.68556 | 2.37925E-14 | 1242.48 | 7546.1  | 6.07344     | 1.72348E-14 | 2461.2  | 7133.93 | 2.89856  |
| 3.44192 | 3.76477E-08 | 1078.3  | 4212.38 | 3.9065      | 5.19717E-10 | 1228    | 4075.33 | 3.31867  |
|         |             |         |         |             | 0.0010036   | #DIV/0! | 936.525 | #DIV/0!  |
| -2.903  | 5.88609E-06 | 1291.68 | 546.2   | -2.36484    |             |         |         |          |
|         | 0.0130985   | 882.133 | 347.167 | -2.54095    | 0.00435145  | 1449.68 | 537.8   | -2.69557 |
|         |             |         |         |             | 0.000147749 | #DIV/0! | 2300.05 | #DIV/0!  |
|         |             |         |         |             | 0.00112167  | 1692.58 | 281.25  | -6.01804 |
|         |             |         |         |             | 0.0216145   | 1094    | #DIV/0! | #DIV/0!  |
|         | 2.73766E-07 | 4388.58 | 1206.97 | -3.63604    | 6.57315E-09 | 6798.3  | 1175.3  | -5.78431 |
|         | 0.00626449  | 1604.4  | 636.4   | -2.52106    | 7.59807E-07 | 2457.25 | #DIV/0! | #DIV/0!  |
|         | 5.00826E-05 | 1228.4  | 364.5   | -3.3701     | 4.80009E-06 | 2953.9  | 721     | -4.09695 |
|         | 0.00149523  | 897     | 432.05  | -2.07615    | 0.000245804 | 1633.07 | 772.25  | -2.11469 |
|         | 0.0140512   | 783.567 | #DIV/0! | #DIV/0!     | 0.00166424  | 1515.03 | 312.5   | -4.84811 |
|         |             |         |         |             | 4.79822E-05 | 3119    | 607.175 | -5.1369  |
|         |             |         |         |             | 7.42958E-11 | 3547.2  | 933.9   | -3.79827 |
| 2.106   |             |         |         |             | 1.15902E-08 | 1168.3  | 2400.43 | 2.05463  |
|         | 6.24089E-09 | 1194.5  | 2874.43 | 2.40638     | 8.41357E-10 | 1918.83 | 6216.95 | 3.23998  |
|         |             |         |         |             | 1.32557E-12 | 15502.6 | 36577.6 | 2.35945  |
|         |             |         |         |             | 0.009113    | 1058.3  | 435.633 | -2.42934 |
| -2.0887 | 8.90221E-08 | 2577.28 | 863.1   | -2.98607    | 6.08784E-07 | 1748.65 | 721.325 | -2.42422 |
|         | 7.83876E-06 | 13147.1 | 5878.68 | -2.2364     | 1.97591E-06 | 23187.2 | 10389   | -2.23189 |
|         |             |         |         |             | 1.17839E-14 | 6182.63 | 19468.3 | 3.14887  |
|         | 6.51556E-09 | 2426.65 | 5625.05 | 2.31803     | 1.45132E-13 | #DIV/0! | 4981.58 | #DIV/0!  |
|         | 0.0110932   | 612.625 | 262.133 | -2.33707    |             |         |         |          |
|         | 5.53626E-08 | 16008.1 | 52185.2 | 3.25992     | 5.43839E-15 | 5204.58 | 40358.6 | 7.75444  |
|         |             |         |         |             | 0.00163413  | 1397.93 | 659.7   | -2.11903 |
|         |             |         |         |             | 3.6812E-13  | 15247.8 | 40339.6 | 2.6456   |
|         |             |         |         |             | 4.06131E-06 | 5916.3  | 1866.13 | -3.17037 |
|         |             |         |         |             | 9.63952E-07 | 2966.6  | 6157.28 | 2.07553  |
|         | 1.02353E-05 | 3085.65 | 6451.65 | 2.09086     | 3.42059E-07 | 2333.9  | 5584.95 | 2.39297  |
|         | 0.000123281 | 3084.28 | 7283.38 | 2.36145     | 7.06462E-08 | #DIV/0! | 5662.55 | #DIV/0!  |
| 2.45058 |             |         |         |             |             |         |         |          |
| 2.06085 | 9.08208E-12 | 1199.35 | 5496.15 | 4.58261     | 1.27636E-09 | 1595.2  | 4382.95 | 2.74759  |
|         | 0.000714756 | 829.625 | 382.7   | -2.16782    | 0.000184081 | 1200    | 482.1   | -2.48911 |
|         | 0.00335403  | 3000.8  | 1440.83 | -2.0827     |             |         |         |          |
|         | 0.000695718 | 2127.68 | 1054.38 | -2.01795    |             |         |         |          |
|         | 0.00870143  | 1605.33 | 744.65  | -2.15582    |             |         |         |          |

|         |             |         |         |          |             |         |         |          |
|---------|-------------|---------|---------|----------|-------------|---------|---------|----------|
|         |             |         |         |          | 0.00441032  | 1999.6  | 974.55  | -2.05182 |
| 2.0966  |             |         |         |          | 1.0046E-08  | #DIV/0! | 837.9   | #DIV/0!  |
|         | 2.06181E-05 | 6520.95 | 2641.73 | -2.46844 |             |         |         |          |
| 2.82461 | 1.02477E-07 | 943.125 | 2581.6  | 2.73728  | 2.7589E-06  | 998.725 | 2079.85 | 2.08251  |
| 2.18915 | 6.54963E-12 | 2367.98 | 11595.1 | 4.89663  | 5.71889E-13 | 2415.83 | 10229.6 | 4.23441  |
| 2.71617 | 0.000169631 | 614     | 1265.3  | 2.06075  |             |         |         |          |
| 3.1996  | 3.05794E-07 | 686.85  | 2018.15 | 2.93827  |             |         |         |          |
| 3.52262 | 1.00747E-05 | #DIV/0! | 1568.53 | #DIV/0!  |             |         |         |          |
|         | 0.00460912  | 1778.1  | 5922.88 | 3.33101  | 0.00256269  | #DIV/0! | 3616.08 | #DIV/0!  |
|         |             |         |         |          | 8.76298E-10 | 197647  | 83263.1 | -2.37376 |
|         |             |         |         |          | 5.13035E-10 | 2637.9  | 7221.83 | 2.73772  |
|         | 0.00267893  | 606.9   | #DIV/0! | #DIV/0!  | 0.000605655 | 823.9   | 336.6   | -2.44771 |
|         |             |         |         |          | 0.00371734  | 3330.05 | 1433.6  | -2.32286 |
| -2.1149 |             |         |         |          | 2.7007E-13  | 1451.3  | 8015.05 | 5.52267  |
| -2.0491 |             |         |         |          | 5.55107E-14 | 3778    | 21458.6 | 5.67988  |
| -2.1186 |             |         |         |          | 6.36395E-15 | 2880.2  | 21480.7 | 7.45804  |
|         | 0.000252112 | 1835.78 | 909.933 | -2.01748 | 1.85514E-06 | 2868    | 1071.23 | -2.67731 |
|         |             |         |         |          | 6.50025E-05 | 2124.6  | 893.225 | -2.37857 |
|         |             |         |         |          | 7.51274E-07 | #DIV/0! | 1500.78 | #DIV/0!  |
|         |             |         |         |          | 0.000623674 | #DIV/0! | 5131.03 | #DIV/0!  |
| -2.0922 | 9.11754E-07 | 11574.3 | 4141.9  | -2.79443 | 8.8058E-08  | 12977.6 | 4493.6  | -2.88802 |
|         |             |         |         |          | 3.30718E-07 | 2799.97 | 1039.13 | -2.69452 |
|         |             |         |         |          | 3.84124E-07 | 6304.78 | 13385.8 | 2.12312  |
|         |             |         |         |          | 0.00460308  | 592.433 | #DIV/0! | #DIV/0!  |
|         | 1.05028E-10 | 8699.78 | 27620.6 | 3.17486  | 3.31131E-12 | 4365.3  | 16030.6 | 3.67228  |
|         | 3.86321E-08 | 27962.2 | 13658.3 | -2.04726 |             |         |         |          |
|         | 0.0115596   | 672.925 | 311.267 | -2.16189 | 0.000485055 | #DIV/0! | 1788.48 | #DIV/0!  |
|         |             |         |         |          | 5.49585E-05 | 1435.15 | #DIV/0! | #DIV/0!  |
|         |             |         |         |          | 2.68527E-18 | 11778.6 | 55560.5 | 4.71707  |
|         | 1.73817E-14 | 17717.5 | 52961.3 | 2.98921  | 5.31693E-21 | 11082.6 | 58448.7 | 5.27393  |
|         |             |         |         |          | 2.21658E-15 | 9456.53 | 32581.6 | 3.44541  |
|         |             |         |         |          | 0.00526792  | 1203.9  | 479.95  | -2.50839 |
|         |             |         |         |          | 0.0187212   | 2155.83 | 940.5   | -2.29221 |
|         |             |         |         |          | 1.80117E-12 | 21893   | 52544.4 | 2.40006  |
|         |             |         |         |          | 1.21346E-16 | 14397.7 | 49487.9 | 3.43721  |
|         |             |         |         |          | 1.13546E-19 | 12846.8 | 49388.1 | 3.84439  |
|         |             |         |         |          | 0.00116101  | 1161.25 | 427.9   | -2.71384 |
|         |             |         |         |          | 1.1119E-06  | 2148.95 | 6201.13 | 2.88565  |
|         |             |         |         |          | 1.76073E-11 | 18182.1 | 48674.8 | 2.67708  |
|         |             |         |         |          | 1.37334E-10 | 1923.1  | 5657.35 | 2.94179  |
|         |             |         |         |          | 9.25779E-05 | 689.4   | 2231.7  | 3.23716  |
| 2.15815 | 7.30812E-09 | 8028.6  | 24169.5 | 3.01043  | 1.79896E-14 | 3457.9  | 19713.6 | 5.70102  |
|         | 2.83099E-11 | 9298.35 | 32900.7 | 3.53834  | 3.83435E-16 | 4548.18 | 28030.9 | 6.16311  |
|         | 7.84297E-16 | 6079.95 | 25137.6 | 4.13451  | 5.34654E-20 | 2592.48 | 16810   | 6.48414  |
| 2.21182 | 7.05944E-13 | 5866.5  | 25307.8 | 4.31394  | 2.94042E-16 | 2701.33 | 17592.6 | 6.51259  |
|         |             |         |         |          | 1.51437E-17 | 6475.13 | 29478.7 | 4.55261  |
|         | 1.13587E-08 | 5379.35 | 20338.5 | 3.78085  | 5.3605E-09  | 6895.9  | 25703.7 | 3.72739  |
|         |             |         |         |          | 1.09253E-13 | 19985.6 | 66587.6 | 3.33178  |
|         |             |         |         |          | 0.00017853  | 1537.33 | 577.525 | -2.66192 |
|         | 1.02284E-05 | 11757.8 | 5083.08 | -2.31313 | 6.24217E-05 | 21730.2 | 9950.45 | -2.18384 |
|         |             |         |         |          | 1.68166E-05 | 1582.08 | 684.525 | -2.3112  |
|         | 8.06372E-07 | 725.85  | 337.3   | -2.15194 | 5.79295E-10 | 2125.9  | 459.867 | -4.62286 |
|         | 2.97184E-08 | 1176.75 | 434.7   | -2.70704 | 7.20926E-07 | 1382.65 | 635.5   | -2.17569 |
|         | 0.000129878 | 1206.2  | #DIV/0! | #DIV/0!  | 5.55106E-07 | 3694.65 | #DIV/0! | #DIV/0!  |
|         |             |         |         |          | 2.64997E-05 | 1854    | 4450.55 | 2.40051  |
|         |             |         |         |          | 8.94127E-06 | 2366.95 | 7386.75 | 3.12079  |
|         | 6.73242E-06 | 2938.4  | 698.95  | -4.20402 | 3.7609E-06  | 4369.95 | 1169.07 | -3.73798 |
|         |             |         |         |          | 3.09734E-05 | 1683.3  | 689.133 | -2.44263 |
|         |             |         |         |          | 1.28988E-07 | #DIV/0! | 2883.6  | #DIV/0!  |
|         |             |         |         |          | 0.0049436   | #DIV/0! | 1264.47 | #DIV/0!  |

|         |             |         |         |          |             |         |         |          |
|---------|-------------|---------|---------|----------|-------------|---------|---------|----------|
|         |             |         |         |          | 0.000975514 | #DIV/0! | 1844.1  | #DIV/0!  |
|         |             |         |         |          | 0.000317374 | 2159.83 | 1065.03 | -2.02796 |
|         |             |         |         |          | 0.00209039  | #DIV/0! | 2911.18 | #DIV/0!  |
|         |             |         |         |          | 3.36849E-12 | 4174.18 | 9275.2  | 2.22204  |
|         |             |         |         |          | 4.97399E-14 | 4804.65 | 11492   | 2.39184  |
|         |             |         |         |          | 0.0021976   | 2873.35 | 626.45  | -4.58672 |
| -2.146  | 4.02415E-05 | 912.55  | 363.05  | -2.51357 |             |         |         |          |
| #DIV/0! | 0.000166708 | 1074.4  | #DIV/0! | #DIV/0!  |             |         |         |          |
| 6.23239 | 1.8457E-13  | 3190.6  | 38475.6 | 12.059   | 2.08209E-13 | 3283.38 | 30818.9 | 9.38636  |
| -3.8568 | 1.04762E-13 | 7962.45 | 1004.33 | -7.92816 | 8.7497E-10  | 7013.65 | 1673.83 | -4.19019 |
|         | 2.17182E-06 | 30000.1 | 79011.5 | 2.6337   | 2.62398E-16 | 9285.13 | 91872.9 | 9.89463  |
| 2.19103 | 1.03359E-10 | 10660.5 | 36490.9 | 3.423    | 9.83486E-11 | 7407.75 | 24039.7 | 3.24521  |
| 2.07825 | 8.67615E-13 | 11372.7 | 54616.3 | 4.80242  | 1.55608E-14 | 7394    | 38238   | 5.17149  |
|         | 1.15622E-05 | 673.025 | #DIV/0! | #DIV/0!  | 4.79213E-05 | 2030.23 | 418.65  | -4.84946 |
| -3.0896 |             |         |         |          |             |         |         |          |
|         |             |         |         |          | 7.75619E-06 | 1363.83 | 486.55  | -2.80307 |
| #DIV/0! |             |         |         |          |             |         |         |          |
|         |             |         |         |          | 3.62193E-09 | 1292.73 | 308.8   | -4.18631 |
|         |             |         |         |          | 8.8518E-06  | 1492.25 | 451.8   | -3.3029  |
|         | 3.25666E-06 | 3550.58 | 12909.5 | 3.63589  | 5.63179E-09 | 2822.8  | 8889.88 | 3.14931  |
|         | 2.73212E-06 | 15741.8 | 42488.6 | 2.69909  | 7.85396E-13 | 4610.2  | 35896.3 | 7.78628  |
| 2.29124 | 0.000033677 | 315.2   | 1066.63 | 3.38396  |             |         |         |          |
|         |             |         |         |          | 7.31187E-12 | #DIV/0! | 970.9   | #DIV/0!  |
|         |             |         |         |          | 6.74507E-05 | #DIV/0! | 940.167 | #DIV/0!  |
|         |             |         |         |          | 0.00420018  | #DIV/0! | 1504.33 | #DIV/0!  |
| 2.61732 |             |         |         |          |             |         |         |          |
| 3.33687 | 0.000134671 | 4334.05 | 12542.1 | 2.89385  |             |         |         |          |
| 3.93376 | 7.80993E-13 | 3793.83 | 15007.6 | 3.9558   |             |         |         |          |
|         | 0.0054524   | 1948.6  | 628.625 | -3.09978 | 0.000770911 | 5638.85 | 1107.65 | -5.09082 |
|         | 0.00134492  | 1225.3  | 327.6   | -3.74023 | 0.000374676 | 3575.7  | 834.3   | -4.28587 |
|         |             |         |         |          | 0.000192105 | #DIV/0! | 1600.7  | #DIV/0!  |
|         | 3.6919E-07  | 919.25  | 336     | -2.73586 |             |         |         |          |
|         | 5.05439E-05 | 950.475 | 312.625 | -3.0403  | 0.000176451 | 1311.53 | 492.5   | -2.66299 |
|         | 7.52206E-05 | 1301.25 | 519.175 | -2.50638 |             |         |         |          |
|         | 0.00327158  | #DIV/0! | 1881    | #DIV/0!  |             |         |         |          |
|         |             |         |         |          | 1.21054E-07 | 1924.4  | 4207.05 | 2.18616  |
|         |             |         |         |          | 2.27531E-05 | 1052.8  | 292.4   | -3.60055 |
| -2.0341 |             |         |         |          |             |         |         |          |
|         | 9.12784E-05 | 1155.53 | 395.25  | -2.92353 | 1.61792E-06 | 3054.58 | 698.425 | -4.37352 |
|         |             |         |         |          | 3.47557E-07 | 3036.98 | 1086.88 | -2.79423 |
|         |             |         |         |          | 2.92713E-06 | 3800.33 | 1504.9  | -2.5253  |
|         |             |         |         |          | 0.000408137 | 2152.88 | 1016    | -2.11897 |
|         |             |         |         |          | 0.00860754  | 987.4   | 461.3   | -2.14047 |
|         |             |         |         |          | 0.000123755 | 1544.33 | 408.5   | -3.78048 |
|         | 0.00565858  | 880.8   | 318.7   | -2.76373 | 0.00147166  | 1460.33 | 511.3   | -2.8561  |
|         |             |         |         |          | 8.04596E-10 | 2648.15 | #DIV/0! | #DIV/0!  |
|         |             |         |         |          | 1.3276E-07  | 5778.63 | 12924.3 | 2.23657  |
|         |             |         |         |          | 3.0653E-07  | 6257.95 | 13233.1 | 2.11461  |
|         |             |         |         |          | 1.42951E-06 | #DIV/0! | 2476.3  | #DIV/0!  |
|         |             |         |         |          | 1.62044E-10 | 46980.3 | 164227  | 3.49567  |
|         |             |         |         |          | 9.3202E-07  | 4994.15 | 11450.4 | 2.29276  |
|         |             |         |         |          | 3.50416E-11 | 10876   | 25147   | 2.31216  |
|         |             |         |         |          | 1.60161E-09 | 5684.38 | 16525.6 | 2.90719  |
|         |             |         |         |          | 3.04685E-11 | #DIV/0! | 2533.95 | #DIV/0!  |
|         |             |         |         |          | 2.2502E-10  | 5133.9  | 13546.2 | 2.63858  |
|         |             |         |         |          | 8.78629E-14 | 5892.6  | 21249.5 | 3.60613  |
|         |             |         |         |          | 9.85081E-14 | 5397.45 | 19778.9 | 3.66449  |
|         |             |         |         |          | 0.00316622  | #DIV/0! | 1444.83 | #DIV/0!  |
|         |             |         |         |          | 2.6375E-08  | 5610.05 | 16001.6 | 2.8523   |
| -2.0984 |             |         |         |          |             |         |         |          |
|         |             |         |         |          | 2.88656E-06 | #DIV/0! | 2090.35 | #DIV/0!  |
| -3.4093 | 3.39419E-06 | 1003.23 | 228.65  | -4.3876  | 4.94917E-06 | 1698.83 | 503.25  | -3.37571 |
| -2.0777 | 7.20205E-06 | 1351.8  | 468.825 | -2.88338 |             |         |         |          |



|         |             |         |         |          |             |         |         |          |
|---------|-------------|---------|---------|----------|-------------|---------|---------|----------|
|         |             |         |         |          | 0.000307163 | #DIV/0! | 1296.75 | #DIV/0!  |
|         | 0.000741404 | 547.65  | 245.067 | -2.2347  | 1.25051E-06 | 1225.08 | 448.8   | -2.72967 |
|         |             |         |         |          | 1.08285E-05 | 2597.58 | 1225.3  | -2.11995 |
|         | 4.70812E-05 | 4606.93 | 9514.2  | 2.0652   | 6.78353E-06 | 3846.5  | 9367.58 | 2.43535  |
|         | 5.66191E-05 | 2043.28 | 983.525 | -2.0775  |             |         |         |          |
|         | 1.27213E-06 | 815.6   | 282.5   | -2.88708 |             |         |         |          |
| 4.02722 | 2.02865E-06 | 1839.7  | 5171.83 | 2.81123  | 3.74738E-12 | #DIV/0! | 7090.93 | #DIV/0!  |
|         |             |         |         |          | 1.51398E-12 | 2060.8  | 4693.1  | 2.27732  |
|         |             |         |         |          | 9.90353E-18 | 4002.38 | 12921.8 | 3.22854  |
|         | 7.60051E-07 | 925.775 | 2423.95 | 2.61829  |             |         |         |          |
|         | 0.00102586  | 1426.15 | 612.733 | -2.32752 | 2.57249E-07 | 3560.5  | 754.475 | -4.71918 |
|         |             |         |         |          | 3.00158E-09 | 3604.73 | 808.033 | -4.46111 |
|         |             |         |         |          | 7.91158E-07 | 4483.58 | 1027.6  | -4.36315 |
|         |             |         |         |          | 2.89671E-07 | 2667.23 | 756.3   | -3.52668 |
|         |             |         |         |          | 5.23592E-05 | 2387.03 | 752.567 | -3.17185 |
|         |             |         |         |          | 4.20277E-05 | 1782.53 | 571.625 | -3.11835 |
|         | 0.000931026 | 866.925 | 395.675 | -2.191   | 0.000322558 | 1376.48 | 571.1   | -2.41022 |
|         | 1.7693E-08  | 27394   | 117369  | 4.28448  | 2.85396E-13 | 20428   | 157014  | 7.68623  |
|         |             |         |         |          | 0.000212285 | #DIV/0! | 1967.7  | #DIV/0!  |
| 4.17429 | 1.04055E-12 | 3690.05 | 15895.6 | 4.3077   | 1.62831E-11 | 3074.75 | 10645.8 | 3.46234  |
|         | 1.24304E-06 | 709.4   | 1976.8  | 2.78658  | 0.000198126 | #DIV/0! | 1321.28 | #DIV/0!  |
|         |             |         |         |          | 6.69892E-07 | 4383.6  | 8902.78 | 2.03093  |
|         |             |         |         |          | 1.44035E-10 | 18001.9 | 42553   | 2.36381  |
|         |             |         |         |          | 0.000610981 | 1018.78 | 2356.98 | 2.31354  |
| -2.0082 | 4.61636E-05 | 971.375 | 366.6   | -2.64969 |             |         |         |          |
|         | 0.0002336   | 678.5   | #DIV/0! | #DIV/0!  | 3.50281E-05 | 1649.93 | #DIV/0! | #DIV/0!  |
|         |             |         |         |          | 5.40285E-06 | 1303.43 | 400.7   | -3.25289 |
|         |             |         |         |          | 0.0096631   | 1551.17 | 575.4   | -2.69581 |
|         |             |         |         |          | 0.00231466  | 1706.85 | 311.233 | -5.48415 |
|         |             |         |         |          | 5.30209E-07 | 1404.68 | 491.425 | -2.85837 |
|         |             |         |         |          | 1.19581E-08 | 1422.27 | 4908.55 | 3.45122  |
|         |             |         |         |          | 1.76864E-08 | #DIV/0! | 2724.88 | #DIV/0!  |
|         |             |         |         |          | 2.67759E-05 | #DIV/0! | 6057.9  | #DIV/0!  |
| 7.48954 | 2.41589E-13 | 3050.68 | 38480   | 12.6136  | 1.44615E-15 | 5703.8  | 35896.8 | 6.29349  |
| 2.89914 | 1.98857E-10 | 14030.2 | 82042.2 | 5.84755  | 5.08545E-13 | 12126.1 | 89346.8 | 7.36812  |
|         |             |         |         |          | 0.0224191   | 1236.9  | 419.6   | -2.94781 |
|         |             |         |         |          | 0.000185355 | 1016.5  | 395.5   | -2.57016 |
| -2.9269 | 0.000629921 | 3836.23 | 1627.35 | -2.35734 |             |         |         |          |
| -3.8731 |             |         |         |          |             |         |         |          |
| -3.6255 |             |         |         |          |             |         |         |          |
| -2.5509 |             |         |         |          |             |         |         |          |
|         |             |         |         |          | 2.14805E-07 | 10050.7 | 20854.4 | 2.07492  |
|         |             |         |         |          | 4.71135E-10 | 5598.3  | 14494.2 | 2.58904  |
|         |             |         |         |          | 4.02115E-08 | 10233.7 | 28015.8 | 2.73762  |
| -2.0026 | 2.04733E-10 | 8637.4  | 2655.78 | -3.25231 | 6.17477E-11 | 5698.7  | 1890.73 | -3.01403 |
| 4.02974 | 1.27035E-06 | 2218.3  | 9806.65 | 4.4208   | 0.000253035 | 3452.93 | 8527.18 | 2.46955  |
|         |             |         |         |          | 3.18662E-07 | 2912.5  | 7115.15 | 2.44297  |
|         |             |         |         |          | 9.88215E-11 | 3975.25 | 10043.7 | 2.52655  |
|         |             |         |         |          | 7.2391E-10  | 3368.45 | 10654.9 | 3.16315  |
|         | 8.9383E-08  | 796.95  | 2168.93 | 2.72153  |             |         |         |          |
|         |             |         |         |          | 0.011081    | 2310.13 | 594.933 | -3.883   |
|         | 0.00153645  | 974.867 | 184.4   | -5.2867  | 0.000810308 | 1820.8  | 883.2   | -2.06159 |
|         | 0.0013534   | 890.85  | 351.333 | -2.53563 | 4.32129E-06 | 3029.4  | 477.533 | -6.34385 |
| -2.1205 | 7.51802E-06 | 6453.65 | 2335.45 | -2.76334 | 0.000603779 | 3759.78 | 1850.43 | -2.03184 |
| -2.1155 | 1.14933E-05 | 5738.3  | 2118.33 | -2.70889 |             |         |         |          |
|         |             |         |         |          | 0.00102125  | #DIV/0! | 1907.25 | #DIV/0!  |
|         |             |         |         |          | 0.00030131  | 1268.3  | #DIV/0! | #DIV/0!  |
|         |             |         |         |          |             |         |         |          |
|         |             |         |         |          | 0.000211597 | 1945.15 | 522.267 | -3.72444 |
| -4.038  |             |         |         |          | 0.00319728  | 1306.7  | 2881.03 | 2.20481  |



|         |             |         |         |          |             |         |         |          |
|---------|-------------|---------|---------|----------|-------------|---------|---------|----------|
|         | 0.00434611  | 3785.75 | 1684.95 | -2.2468  | 0.0021321   | 3503.7  | 1528.15 | -2.29277 |
|         | 0.00291914  | 6279.83 | 2776.6  | -2.2617  |             |         |         |          |
|         | 5.12035E-05 | 13590.5 | 5711.23 | -2.3796  |             |         |         |          |
| -2.8305 | 0.00111114  | 2723.35 | 1118    | -2.43591 | 8.87609E-07 | 2291.48 | 717.8   | -3.19236 |
| -2.3752 |             |         |         |          | 0.000202086 | 1927.7  | 864.225 | -2.23055 |
| -2.1643 | 0.000260797 | 3588.95 | 1615.4  | -2.22171 |             |         |         |          |
| -2.2477 |             |         |         |          |             |         |         |          |
|         |             |         |         |          | 2.09115E-13 | 4540.15 | 13137.7 | 2.89368  |
|         |             |         |         |          | 0.00685874  | 1962.7  | 597.5   | -3.28485 |
|         |             |         |         |          | 7.80198E-06 | 1295.1  | 433.7   | -2.98617 |
| 2.02939 | 2.15375E-15 | 10352.6 | 37192.1 | 3.59254  | 1.52558E-19 | 6920.38 | 35306.7 | 5.10185  |
| 2.13476 | 2.67605E-14 | 8489.8  | 36542.9 | 4.30433  | 4.1506E-18  | 5980.55 | 36025.5 | 6.02377  |
|         |             |         |         |          | 5.1639E-08  | 43502   | 21565.1 | -2.01724 |
| 2.2131  | 1.33968E-10 | 5027.05 | 13331.8 | 2.652    | 6.43249E-14 | 3594.25 | 12766.4 | 3.55188  |
| 2.34447 | 4.6859E-15  | 15438.8 | 57819.8 | 3.7451   | 2.26021E-19 | 9954.73 | 54611   | 5.48594  |
| 2.50213 | 7.49375E-15 | 5439.43 | 23510.5 | 4.32224  | 2.03659E-19 | 3103.58 | 22606.9 | 7.28413  |
|         |             |         |         |          | 0.00235586  | 768.4   | 354.7   | -2.16634 |
|         |             |         |         |          | 0.0148935   | 831.875 | 379.267 | -2.19338 |
|         |             |         |         |          | 0.000111358 | 964.525 | 1958.93 | 2.03097  |
|         |             |         |         |          | 7.79669E-07 | 2154.03 | 4451.33 | 2.06652  |
| -2.0628 | 0.000335785 | 2158.23 | 931.275 | -2.31749 | 2.65129E-06 | 1939.48 | 698.7   | -2.77583 |
|         | 0.000209159 | 3487.13 | 1695.78 | -2.05636 |             |         |         |          |
|         |             |         |         |          | 2.58351E-06 | 1509.95 | 672.25  | -2.24611 |
|         | 0.000140361 | 1012.7  | 488.9   | -2.07138 |             |         |         |          |
|         | 0.000366258 | 1262.05 | 580.1   | -2.17557 | 3.54426E-06 | 2164.63 | 688.233 | -3.14519 |
|         | 1.72799E-06 | 828.025 | 217.5   | -3.80701 |             |         |         |          |
| -2.0596 |             |         |         |          |             |         |         |          |
|         | 0.000141125 | #DIV/0! | 3094.05 | #DIV/0!  | 1.77937E-13 | #DIV/0! | 3281.35 | #DIV/0!  |
|         | 7.6333E-06  | 1061.85 | 2129.63 | 2.00558  |             |         |         |          |
|         | 1.44198E-05 | 1114.08 | 462.133 | -2.41072 | 1.97161E-06 | 2438.38 | 1026.2  | -2.37612 |
|         | 0.0111252   | 1492.05 | 512.9   | -2.90905 |             |         |         |          |
|         |             |         |         |          | 4.48067E-08 | 1903.8  | 506.2   | -3.76096 |
| -2.2116 | 0.000839787 | 9594.65 | 4092.23 | -2.3446  | 1.11976E-06 | 12305.2 | 29460.7 | 2.39417  |
| 3.07388 | 0.00037469  | #DIV/0! | 1050.6  | #DIV/0!  | 3.4014E-06  | #DIV/0! | 647.175 | #DIV/0!  |
|         |             |         |         |          | 0.00134978  | 1255.73 | 606.9   | -2.06908 |
|         |             |         |         |          | 0.000856626 | 1423.53 | 529.175 | -2.69008 |
| -2.275  | 6.97009E-08 | 1375.75 | 589.5   | -2.33376 |             |         |         |          |
|         |             |         |         |          | 2.52208E-05 | 1446.97 | #DIV/0! | #DIV/0!  |
|         | 0.00536932  | 506.333 | 216.6   | -2.33764 |             |         |         |          |
|         | 0.000555176 | 1280.55 | 517.35  | -2.47521 | 1.04991E-05 | 2860.9  | 948.7   | -3.0156  |
|         |             |         |         |          | 0.00667855  | #DIV/0! | 539.6   | #DIV/0!  |
|         | 1.64357E-05 | 1359.85 | 3864.65 | 2.84197  | 8.91282E-05 | 1462.95 | 3627.83 | 2.4798   |
|         | 0.000573268 | 1106.48 | 2322.88 | 2.09935  |             |         |         |          |
| 2.24    |             |         |         |          |             |         |         |          |
|         | 0.00233947  | 882.575 | 436.1   | -2.02379 | 0.0085277   | 1553.37 | 627.2   | -2.47667 |
|         | 1.58996E-08 | 6998.83 | 19004.6 | 2.7154   | 7.16207E-15 | 5650.35 | 38523.7 | 6.81793  |
| -2.4613 | 2.68157E-09 | 5010.7  | 1068.08 | -4.69134 | 6.85014E-10 | 5755.73 | 1338.73 | -4.29941 |
|         |             |         |         |          | 8.75549E-08 | 2916.68 | 954     | -3.05731 |
|         | 0.00183595  | 530.15  | 1098.1  | 2.0713   |             |         |         |          |
|         |             |         |         |          | 0.000710283 | 1199.5  | 558.967 | -2.14592 |
|         |             |         |         |          | 1.24019E-07 | 3080.35 | 6401.53 | 2.07818  |
|         |             |         |         |          | 3.91037E-05 | 3798.05 | 8134.53 | 2.14176  |
|         |             |         |         |          | 3.98262E-17 | 6142.35 | 20246.6 | 3.29623  |
|         | 0.00664314  | 655.225 | 170.3   | -3.84748 | 0.00426218  | 1218.3  | 414.833 | -2.93684 |
|         |             |         |         |          | 0.0117112   | 1045.13 | 320.1   | -3.265   |
|         |             |         |         |          | 0.0146622   | 1115.67 | #DIV/0! | #DIV/0!  |
|         |             |         |         |          | 1.01879E-06 | #DIV/0! | 3661.35 | #DIV/0!  |
|         | 1.21102E-05 | 775.525 | 352.05  | -2.20288 |             |         |         |          |
|         | 0.00353464  | 2832.95 | 7381.05 | 2.60543  | 0.0116524   | 2496.4  | 6093.78 | 2.44103  |
|         |             |         |         |          | 8.94798E-11 | 2053.38 | 4555.43 | 2.21851  |
|         | 8.44219E-05 | 695.475 | 165.567 | -4.20057 | 0.000150969 | 1413.08 | 405     | -3.48907 |
| 4.23382 | 1.40924E-09 | 1380.55 | 5284.73 | 3.82799  | 1.59399E-07 | 2311.58 | 6595.88 | 2.85341  |

|             |             |         |          |             |             |         |          |          |
|-------------|-------------|---------|----------|-------------|-------------|---------|----------|----------|
| 1.81058E-06 | 1189.03     | 525.4   | -2.26309 | 0.00163127  | 2194.85     | 445.85  | -4.92284 |          |
|             |             |         |          | 0.0100532   | 1140        | #DIV/0! | #DIV/0!  |          |
|             |             |         |          | 1.21005E-05 | 1830.03     | 3893.18 | 2.12739  |          |
|             |             |         |          | 5.11245E-10 | 10518.6     | 26320.7 | 2.5023   |          |
|             |             |         |          | 3.57899E-12 | 16644.8     | 43884.9 | 2.63655  |          |
|             |             |         |          | 6.5369E-07  | 1691.85     | 537.525 | -3.14748 |          |
| 3.08526E-06 | 745.75      | 245.025 | -3.04357 | 3.01502E-05 | 1358.28     | 504.933 | -2.69001 |          |
|             |             |         |          | 0.00145113  | 1626.95     | 331.2   | -4.91229 |          |
|             |             |         |          | 0.00253581  | 1085.87     | #DIV/0! | #DIV/0!  |          |
|             |             |         |          | 2.20683E-08 | #DIV/0!     | 2502.13 | #DIV/0!  |          |
| 0.00178968  | 584.875     | 270.35  | -2.1634  | 3.01775E-05 | 3141.9      | 955.6   | -3.28788 |          |
| 0.00280124  | 926.65      | 421.6   | -2.19794 | 0.000943823 | 3229.28     | 638.625 | -5.05661 |          |
|             |             |         |          | 4.35436E-07 | 4032.53     | 13224.1 | 3.27935  |          |
|             |             |         |          | 1.71807E-08 | 2656.88     | 13668.1 | 5.14442  |          |
|             |             |         |          | 0.00202236  | 718.367     | #DIV/0! | #DIV/0!  |          |
| 1.71524E-06 | 944.25      | 311.8   | -3.02838 | 6.40467E-06 | 1040.7      | 357.667 | -2.90969 |          |
| 1.94231E-07 | 1078.2      | 332.6   | -3.24173 |             |             |         |          |          |
|             |             |         |          | 4.46126E-06 | 1551.43     | 458.475 | -3.38388 |          |
|             |             |         |          | 0.000126502 | 1812.85     | 796.233 | -2.27678 |          |
| -2.0813     | 2.24858E-10 | 1008.25 | 369.1    | -2.73164    | 2.21597E-11 | 1574.1  | 549.8    | -2.86304 |
|             |             |         |          |             | 6.00064E-08 | 1539.78 | 498.175  | -3.09083 |
|             |             |         |          | 0.00227861  | 2214.7      | 1085.25 | -2.04073 |          |
|             |             |         |          |             |             |         |          |          |
|             |             |         |          | 2.4525E-07  | 3984.1      | 1856.5  | -2.14603 |          |
|             |             |         |          | 4.88619E-12 | 1817.2      | 10157.5 | 5.58963  |          |
| 3.45898E-05 | 625.4       | #DIV/0! | #DIV/0!  | 0.00171188  | #DIV/0!     | 1489.9  | #DIV/0!  |          |
|             |             |         |          | 7.17179E-05 | 841.075     | 2104.43 | 2.50207  |          |
|             |             |         |          | 0.00016907  | #DIV/0!     | 3746.38 | #DIV/0!  |          |
| 0.000168582 | 817.075     | 380.9   | -2.14512 | 1.08115E-06 | 1458.83     | 528.75  | -2.75901 |          |
| 1.94017E-05 | 7542.25     | 3324.73 | -2.26853 | 4.43241E-06 | 13739.5     | 5482.18 | -2.50621 |          |
|             |             |         |          | 7.01553E-05 | #DIV/0!     | 1918.5  | #DIV/0!  |          |
| -3.0371     | 1.91198E-12 | 8029.18 | 1672.45  | -4.80085    | 2.9264E-07  | 3823.05 | 1533.3   | -2.49335 |
|             | 4.90553E-05 | 996.1   | 381.4    | -2.61169    | 3.43036E-06 | 1535.2  | 615.567  | -2.49396 |
| 2.23738     | 2.85874E-06 | 1704.58 | 3614.15  | 2.12026     | 1.02443E-06 | 1135.67 | 2453.33  | 2.16025  |
|             | 0.000397377 | 1493.33 | 744.825  | -2.00493    |             |         |          |          |
| 2.03006     | 3.44055E-12 | 8216.33 | 23340.3  | 2.84072     | 6.29553E-13 | 5114.28 | 15204.5  | 2.97295  |
| 2.57566     | 5.5163E-07  | #DIV/0! | 1375.57  | #DIV/0!     | 1.87684E-05 | #DIV/0! | 1019.63  | #DIV/0!  |
|             | 5.91251E-08 | 3080.4  | 8092.78  | 2.62718     |             |         |          |          |
|             |             |         |          |             | 0.000151123 | 805.075 | #DIV/0!  | #DIV/0!  |
|             | 1.2825E-06  | 8159    | 3532.5   | -2.3097     |             |         |          |          |
|             |             |         |          |             | 0.0151816   | 1262.87 | 483.067  | -2.61427 |
|             |             |         |          |             | 0.00186067  | 926.2   | 344.767  | -2.68645 |
|             |             |         |          |             |             |         |          |          |
| -2.3774     |             |         |          |             |             |         |          |          |
| 3.24128     | 2.31991E-05 | 322.3   | 1418.98  | 4.40265     |             |         |          |          |
|             |             |         |          |             | 9.50425E-12 | 3218.4  | 8224.63  | 2.5555   |
|             |             |         |          |             | 5.61434E-07 | 1840.5  | 9706.98  | 5.2741   |
|             |             |         |          |             | 6.23879E-12 | 7881.78 | 77876.2  | 9.88054  |
|             |             |         |          |             | 8.93752E-09 | 1510.73 | 4885.68  | 3.23399  |
|             |             |         |          |             | 1.55846E-07 | 5032.78 | 11277.1  | 2.24073  |
| 0.000125023 | 1405.78     | 668.225 | -2.10374 |             |             |         |          |          |
| 0.00383785  | 642.9       | 178.7   | -3.59765 | 0.0161792   | 810.933     | 397.4   | -2.0406  |          |
| 5.76095E-07 | 5959.95     | 108823  | 18.2591  | 7.08734E-08 | 21482.1     | 145201  | 6.75916  |          |
|             |             |         |          | 0.00770887  | 2410.65     | 660.05  | -3.65222 |          |
|             |             |         |          | 0.00532936  | 1564.28     | 715.767 | -2.18545 |          |
|             |             |         |          | 0.000187011 | #DIV/0!     | 1826.2  | #DIV/0!  |          |

|         |             |         |         |          |             |         |         |          |
|---------|-------------|---------|---------|----------|-------------|---------|---------|----------|
| 5.57152 | 5.60938E-08 | 927.625 | 4266.13 | 4.59898  | 9.59263E-06 | 1608.8  | 3658.03 | 2.27376  |
| #DIV/0! | 2.79291E-06 | #DIV/0! | 4633.28 | #DIV/0!  | 3.59657E-06 | #DIV/0! | 3792.78 | #DIV/0!  |
|         |             |         |         |          | 0.000248453 | #DIV/0! | 2373.4  | #DIV/0!  |
|         |             |         |         |          | 2.68486E-06 | 1280.5  | 441.2   | -2.90231 |
|         | 2.98065E-05 | 2193.8  | 6823.45 | 3.11033  |             |         |         |          |
|         |             |         |         |          | 0.000503192 | #DIV/0! | 1533.85 | #DIV/0!  |
|         |             |         |         |          | 2.79288E-05 | 1661.6  | 637.4   | -2.60684 |
| -2.4491 | 0.000680747 | 1278.28 | 636.75  | -2.0075  |             |         |         |          |
|         |             |         |         |          | 0.00534562  | 1174.97 | 499.175 | -2.35382 |
|         |             |         |         |          | 1.05465E-08 | 3388.4  | 7095.93 | 2.09418  |
|         | 0.0119034   | 1295.2  | 610.5   | -2.12154 |             |         |         |          |
|         |             |         |         |          | 1.31592E-09 | 3722.83 | 9708.15 | 2.60774  |
|         |             |         |         |          | 0.000118219 | #DIV/0! | 2150.28 | #DIV/0!  |
| 2.5859  | 2.71232E-10 | 1859.73 | 5741.83 | 3.08746  | 4.24572E-14 | 1056.85 | 5590.03 | 5.28933  |
|         | 0.000146131 | 753.1   | 1926.3  | 2.55783  | 9.44292E-05 | 1016.9  | 2811.75 | 2.76502  |
|         | 6.64022E-06 | 851.3   | 2791.03 | 3.27854  | 4.81412E-10 | #DIV/0! | 2795.68 | #DIV/0!  |
|         |             |         |         |          | 0.0112514   | 1438.8  | 461.8   | -3.11563 |
|         |             |         |         |          | 0.000258025 | 1468    | 3021.25 | 2.05807  |
|         | 1.61965E-05 | 1218.93 | 480.333 | -2.53766 |             |         |         |          |
|         |             |         |         |          | 2.82919E-05 | 1087.8  | #DIV/0! | #DIV/0!  |
|         | 6.8776E-06  | 1578.3  | 3159.15 | 2.00162  | 0.00125235  | #DIV/0! | 1755.25 | #DIV/0!  |
|         |             |         |         |          | 0.000185898 | 1315.03 | 470.7   | -2.79376 |
|         | 0.00164284  | 695.5   | 284.55  | -2.44421 |             |         |         |          |
|         | 0.00350542  | 846.375 | #DIV/0! | #DIV/0!  | 0.00934652  | 2135.4  | 733.675 | -2.91055 |
| 14.6639 | 1.38828E-07 | 491.35  | 2369.55 | 4.82253  | 4.14051E-05 | 749.1   | 2664.83 | 3.55737  |
| 27.9261 | 6.27365E-16 | 484.4   | 9173.75 | 18.9384  | 3.60998E-12 | 1097.6  | 10220.6 | 9.31177  |
| 45.8973 | 3.06658E-17 | 414     | 16680   | 40.2897  | 1.72985E-15 | 1491.15 | 25310.8 | 16.974   |
|         |             |         |         |          | 0.0139268   | 1219.28 | 503.4   | -2.42208 |
|         |             |         |         |          | 1.87182E-11 | 6879.78 | 23775.2 | 3.45581  |
|         |             |         |         |          | 2.33143E-06 | 2986.5  | 1089.37 | -2.7415  |
|         |             |         |         |          | 8.49895E-06 | 10008.4 | 3948.05 | -2.53502 |
|         | 6.32596E-05 | 10158.5 | 4854.88 | -2.09242 | 3.07254E-06 | 17084.1 | 7395.85 | -2.30995 |
|         | 4.19892E-07 | 2589.6  | 966.467 | -2.67945 |             |         |         |          |
|         |             |         |         |          | 0.00132978  | 1273.3  | 220.3   | -5.77985 |
|         |             |         |         |          | 0.000115938 | 1152    | 341.8   | -3.37039 |
|         |             |         |         |          | 6.60257E-05 | 6497    | 1331.25 | -4.88038 |
|         |             |         |         |          | 0.000630374 | 1850.08 | 401.7   | -4.60561 |
|         | 0.000003473 | 1107.75 | 448.6   | -2.46935 |             |         |         |          |
|         | 0.00190538  | 596.833 | #DIV/0! | #DIV/0!  |             |         |         |          |
|         | 1.5886E-06  | 1686    | 455.4   | -3.70224 | 1.0374E-06  | 3254.38 | 915.45  | -3.55495 |
|         | 0.000707779 | 1230.7  | #DIV/0! | #DIV/0!  | 0.000495808 | 1723.17 | 515.1   | -3.34531 |
| #DIV/0! | 0.00380679  | #DIV/0! | 2833.28 | #DIV/0!  |             |         |         |          |
|         | 0.000245896 | 1530.18 | 686.625 | -2.22855 |             |         |         |          |
|         |             |         |         |          | 1.59496E-12 | 3498.83 | 9836.85 | 2.81147  |
|         | 0.00266099  | 1762.1  | 4151.6  | 2.35605  |             |         |         |          |
| -2.2923 | 7.74401E-08 | 4138.6  | 1644.47 | -2.51668 |             |         |         |          |
|         |             |         |         |          | 1.77322E-14 | 2595.58 | 6526.55 | 2.51449  |
|         |             |         |         |          | 1.29326E-07 | 3420.88 | 8219.35 | 2.4027   |
|         | 4.51164E-06 | 5004.35 | 10566.6 | 2.11148  | 1.06245E-08 | 2657.35 | 7016.8  | 2.64053  |
|         |             |         |         |          | 8.03385E-11 | 2982.5  | 7990.98 | 2.67929  |
| 6.5338  | 2.30449E-10 | 3116.43 | 32181.6 | 10.3264  | 2.81775E-11 | 4268.2  | 33284.3 | 7.79819  |
|         |             |         |         |          | 8.28557E-15 | 8446.93 | 29137   | 3.44942  |
|         |             |         |         |          | 0.00614201  | #DIV/0! | 594.425 | #DIV/0!  |
| #DIV/0! |             |         |         |          |             |         |         |          |
|         |             |         |         |          | 1.17452E-08 | #DIV/0! | 3674.23 | #DIV/0!  |
| -2.4639 | 1.10484E-05 | 2264.23 | 934.9   | -2.42189 |             |         |         |          |
|         | 0.00436788  | 1578.88 | 540.775 | -2.91965 | 0.000604979 | 3338.53 | 1027.15 | -3.25028 |
|         |             |         |         |          | 0.00518596  | #DIV/0! | 1446.78 | #DIV/0!  |
|         |             |         |         |          | 1.20443E-08 | #DIV/0! | 2685.7  | #DIV/0!  |
|         | 1.61163E-08 | 2623.65 | 5754.6  | 2.19336  |             |         |         |          |

|                              |             |         |         |          |             |         |         |          |
|------------------------------|-------------|---------|---------|----------|-------------|---------|---------|----------|
|                              |             |         |         |          | 1.43036E-07 | 2936.68 | 1456.58 | -2.01615 |
|                              | 1.86605E-05 | 1499.38 | 565.5   | -2.65141 | 0.00821857  | 1190.13 | #DIV/0! | #DIV/0!  |
|                              |             |         |         |          | 2.53274E-09 | #DIV/0! | 2948.8  | #DIV/0!  |
|                              |             |         |         |          | 5.43175E-06 | 3416.68 | 1400.55 | -2.43952 |
|                              | 2.72891E-05 | 2087.45 | 805.467 | -2.5916  | 6.98591E-06 | 1914.63 | 693.4   | -2.76122 |
|                              |             |         |         |          | 3.2293E-06  | 3074.65 | 6597.05 | 2.14563  |
|                              |             |         |         |          | 0.0213884   | 1218.98 | 550.225 | -2.21541 |
|                              | 0.006136    | 599.95  | #DIV/0! | #DIV/0!  | 0.0051388   | 873.675 | #DIV/0! | #DIV/0!  |
| -2.3106                      | 0.00581255  | 577.4   | 206.4   | -2.79748 |             |         |         |          |
|                              |             |         |         |          | 7.77388E-08 | 7369.88 | 1269.7  | -5.80442 |
|                              | 3.21487E-06 | 2305.95 | 889.225 | -2.59321 | 2.90707E-05 | 2695.4  | 1211.63 | -2.22462 |
|                              |             |         |         |          | 3.56411E-06 | #DIV/0! | 1229.73 | #DIV/0!  |
|                              |             |         |         |          | 1.8108E-07  | 6879.93 | 16356.3 | 2.3774   |
|                              |             |         |         |          | 2.20126E-06 | 8949.85 | 21957.1 | 2.45334  |
|                              |             |         |         |          | 1.77191E-15 | 13006.7 | 54114.1 | 4.16048  |
|                              |             |         |         |          | 2.65103E-16 | 4783.48 | 20504   | 4.28641  |
|                              |             |         |         |          | 2.32274E-07 | #DIV/0! | 950.833 | #DIV/0!  |
|                              |             |         |         |          | 0.00315958  | #DIV/0! | 1025.3  | #DIV/0!  |
|                              |             |         |         |          | 1.29795E-09 | 3272.3  | 9097.8  | 2.78025  |
|                              |             |         |         |          | 0.00747047  | #DIV/0! | 831.467 | #DIV/0!  |
|                              |             |         |         |          | 1.08807E-08 | 1377.5  | 3435.55 | 2.49405  |
|                              |             |         |         |          | 5.57198E-12 | 7741.78 | 19315.1 | 2.49492  |
|                              |             |         |         |          | 0.000300422 | #DIV/0! | 1487.87 | #DIV/0!  |
| -3.1597                      | 7.46595E-12 | 3255.05 | 595.567 | -5.46547 | 5.14581E-09 | 3559.93 | 945.6   | -3.76473 |
|                              |             |         |         |          | 1.34432E-08 | 11374.3 | 24183.5 | 2.12615  |
|                              |             |         |         |          | 4.82387E-08 | 7453.58 | 17436.7 | 2.33937  |
|                              | 7.67132E-05 | 798.75  | 162.6   | -4.91236 | 8.44213E-05 | 1466.8  | 391.225 | -3.74925 |
|                              |             |         |         |          | 2.43329E-05 | #DIV/0! | 1642.3  | #DIV/0!  |
|                              |             |         |         |          | 0.00105575  | #DIV/0! | 1775.73 | #DIV/0!  |
|                              |             |         |         |          | 0.00154715  | #DIV/0! | 2472.7  | #DIV/0!  |
|                              |             |         |         |          | 8.93615E-06 | 1688.48 | 533.2   | -3.16668 |
|                              |             |         |         |          | 1.51435E-07 | #DIV/0! | 6289.25 | #DIV/0!  |
| #DIV/0!<br>2.47353           | 0.0026642   | #DIV/0! | 1386.78 | #DIV/0!  | 0.00118008  | #DIV/0! | 2143.78 | #DIV/0!  |
|                              |             |         |         |          | 1.40301E-08 | 3264.38 | 1351.03 | -2.41622 |
|                              |             |         |         |          | 0.00592548  | #DIV/0! | 1243.25 | #DIV/0!  |
|                              |             |         |         |          | 0.0174716   | #DIV/0! | 1193.98 | #DIV/0!  |
|                              |             |         |         |          | 1.04885E-05 | 3755.95 | 9442.68 | 2.51406  |
| 6.32322                      | 8.21362E-10 | 2321.2  | 40242.2 | 17.3368  | 1.25066E-13 | 2311.4  | 41408.2 | 17.9148  |
|                              | 2.01032E-05 | 338.375 | 1529.43 | 4.51991  | 7.62955E-07 | 387.6   | 898.075 | 2.31701  |
|                              | 1.17104E-10 | 6927.35 | 19878.8 | 2.86961  | 3.56821E-16 | 3274.55 | 15441.9 | 4.71574  |
|                              |             |         |         |          | 0.00335879  | 1511.23 | 582.925 | -2.59249 |
|                              | 0.00284568  | 914.8   | 404.275 | -2.26282 |             |         |         |          |
|                              | 0.000733175 | 2359.6  | 1029.88 | -2.29115 | 1.63461E-08 | 2663.85 | 1071.98 | -2.48499 |
|                              | 1.4349E-07  | 1827.3  | 804.767 | -2.2706  | 8.36007E-10 | 2103.95 | 5889.75 | 2.79938  |
| -2.1656                      |             |         |         |          |             |         |         |          |
|                              | 4.5997E-08  | 12619.7 | 32483   | 2.57399  | 2.53697E-10 | 2808.85 | 6556.35 | 2.33418  |
|                              | 0.0150795   | 1924.3  | 956.775 | -2.01124 | 1.87156E-16 | 4065.73 | 28251.1 | 6.9486   |
|                              | 0.00114771  | 1147    | 3149.68 | 2.74601  | 0.000134567 | #DIV/0! | 1213.85 | #DIV/0!  |
|                              | 0.0103457   | 623.567 | #DIV/0! | #DIV/0!  | 0.0228881   | #DIV/0! | 2147.88 | #DIV/0!  |
|                              |             |         |         |          | 0.00264199  | #DIV/0! | 1657.97 | #DIV/0!  |
|                              |             |         |         |          | 0.00347211  | #DIV/0! | 1095.37 | #DIV/0!  |
| #DIV/0!<br>-3.1452<br>-2.062 | 0.000292471 | 4381.43 | 1973.6  | -2.22002 | 5.11441E-05 | 2056.77 | 721.325 | -2.85137 |
|                              |             |         |         |          | 1.55632E-08 | 2922    | 1346.48 | -2.17011 |
|                              |             |         |         |          | 2.40606E-07 | 1715.93 | 629.1   | -2.7276  |

#DIV/0!

|         |             |         |         |          |             |         |         |          |
|---------|-------------|---------|---------|----------|-------------|---------|---------|----------|
|         | 1.11884E-05 | 34424   | 93769   | 2.72394  | 7.53919E-14 | 14254.4 | 127935  | 8.97508  |
|         | 4.6843E-06  | 30851.7 | 89787.4 | 2.91029  | 1.6896E-14  | 11856.4 | 119576  | 10.0854  |
|         | 5.76117E-06 | 24782.5 | 78054   | 3.14956  | 6.85635E-14 | 9686.1  | 98547.1 | 10.1741  |
| 2.76103 | 1.56922E-08 | 1022.85 | 3601.7  | 3.52124  | 4.85869E-08 | 1153.5  | 3559.45 | 3.08578  |
|         |             |         |         |          | 4.34718E-05 | 2487.9  | 900.1   | -2.76403 |
|         |             |         |         |          | 8.31433E-07 | 2095.38 | 879     | -2.38382 |
|         |             |         |         |          | 0.000919126 | 1287.27 | 468.233 | -2.7492  |
|         |             |         |         |          | 4.61804E-05 | 7742.33 | 3643.13 | -2.12519 |
|         |             |         |         |          | 9.14308E-13 | 5551.05 | 11833.4 | 2.13174  |
|         |             |         |         |          | 1.61244E-11 | 6116.95 | 14750.9 | 2.41147  |
|         | 0.00488113  | #DIV/0! | 680.6   | #DIV/0!  | 2.38693E-05 | #DIV/0! | 572.9   | #DIV/0!  |
|         |             |         |         |          | 0.000690772 | 1365.63 | 641.3   | -2.12948 |
|         |             |         |         |          | 1.36993E-05 | #DIV/0! | 1399.83 | #DIV/0!  |
|         |             |         |         |          | 8.19839E-05 | #DIV/0! | 1553.58 | #DIV/0!  |
|         |             |         |         |          | 0.000602281 | #DIV/0! | 1708.25 | #DIV/0!  |
|         | 8.9104E-09  | 1702.2  | 4047.08 | 2.37756  |             |         |         |          |
|         | 2.97669E-05 | 3066.28 | 953.05  | -3.21733 | 2.89117E-06 | 9634.5  | 2475.13 | -3.89253 |
|         | 0.000020488 | 11976.2 | 3161.75 | -3.78783 | 5.24834E-05 | 19989.1 | 7041.1  | -2.83892 |
|         |             |         |         |          | 0.00161234  | 2051.6  | 832.775 | -2.46357 |
|         |             |         |         |          | 0.00047366  | 4532.73 | 2093.8  | -2.16483 |
|         |             |         |         |          | 0.000160023 | 1693.23 | 778.433 | -2.17518 |
|         | 5.63339E-07 | 1355.73 | 559.725 | -2.42213 | 0.00137723  | 1748.9  | 868.367 | -2.01401 |
|         | 0.00233387  | 1134.35 | 487.15  | -2.32854 | 0.00128342  | 1344.27 | 636.2   | -2.11296 |
|         |             |         |         |          | 0.0128971   | 878     | 292.7   | -2.99966 |
|         | 0.000355525 | 566.7   | 142.6   | -3.97405 | 0.00254458  | 1239.3  | 508.5   | -2.43717 |
|         | 0.000317448 | 543.05  | 143     | -3.79755 | 5.36331E-05 | 953.925 | #DIV/0! | #DIV/0!  |
|         |             |         |         |          | 0.000212272 | 1105.93 | 356.6   | -3.1013  |
|         |             |         |         |          | 0.00832604  | 1095    | 469.1   | -2.33426 |
|         | 0.00161923  | 1398.43 | 424.867 | -3.29144 |             |         |         |          |
|         | 8.46744E-07 | 2045.73 | 624.175 | -3.27749 |             |         |         |          |
|         | 0.000213568 | 1836.45 | 838.433 | -2.19034 |             |         |         |          |
|         |             |         |         |          | 0.00123071  | 1986.53 | 915.05  | -2.17096 |
|         | 0.000513478 | 691.1   | #DIV/0! | #DIV/0!  |             |         |         |          |
|         |             |         |         |          | 0.00951943  | 1350.25 | 509.325 | -2.65106 |
|         |             |         |         |          | 9.07492E-11 | 4042.53 | 10126.8 | 2.50506  |
| -2.6566 | 0.00288384  | 1765.65 | #DIV/0! | #DIV/0!  | 0.000103684 | 2699.55 | #DIV/0! | #DIV/0!  |
|         | 1.18166E-07 | 1343.83 | 534.05  | -2.51631 | 0.000242503 | #DIV/0! | 926.967 | #DIV/0!  |
|         | 9.06746E-08 | 2228.03 | 6202.65 | 2.78392  |             |         |         |          |
| -2.2083 | 2.16052E-07 | 2381.48 | 891.2   | -2.67221 | 1.05727E-06 | 2563.23 | 1026.75 | -2.49645 |
| -3.1523 | 7.11157E-06 | 3488.38 | 1611.33 | -2.16491 | 3.1685E-07  | 3157.25 | 1312.25 | -2.40598 |
|         | 0.00231444  | 624.825 | 242.533 | -2.57624 | 0.0223878   | 1188.17 | 520.167 | -2.2842  |
|         |             |         |         |          | 1.95835E-05 | 2441.68 | 1108.07 | -2.20355 |
|         |             |         |         |          | 0.000504874 | #DIV/0! | 1878.5  | #DIV/0!  |
|         | 2.79892E-10 | 3581.6  | 9860.85 | 2.7532   | 5.51518E-08 | 3581.08 | 7306.38 | 2.04027  |
|         | 1.94625E-09 | #DIV/0! | 3312.98 | #DIV/0!  | 1.56461E-14 | #DIV/0! | 2285.3  | #DIV/0!  |
|         |             |         |         |          | 1.82096E-11 | 3187.43 | 6766.3  | 2.12281  |
|         |             |         |         |          | 0.00295562  | #DIV/0! | 1429.6  | #DIV/0!  |
|         |             |         |         |          | 0.019801    | 864.2   | 297.6   | -2.9039  |
|         |             |         |         |          | 4.66021E-05 | #DIV/0! | 1497.45 | #DIV/0!  |
|         | 0.000799834 | 1468.43 | 343.9   | -4.26994 |             |         |         |          |
|         | 5.23367E-09 | 7222.08 | 16527.8 | 2.28851  | 3.0112E-12  | 4955.18 | 14542.2 | 2.93476  |
|         |             |         |         |          | 0.00557131  | 2095.85 | 497.5   | -4.21276 |
|         |             |         |         |          | 0.00673378  | 2971.67 | 830.25  | -3.57924 |
|         | 9.76245E-08 | 3338    | 8793.75 | 2.63444  |             |         |         |          |
|         |             |         |         |          | 4.11167E-05 | #DIV/0! | 2092.5  | #DIV/0!  |
| 18.8486 | 7.03476E-17 | 2428.5  | 39669   | 16.3348  | 6.81329E-17 | 3990.9  | 52471.4 | 13.1478  |
| 18.7334 | 1.13593E-18 | 2096.73 | 36290.9 | 17.3084  | 8.55473E-19 | 3325.13 | 46860.9 | 14.093   |
| 19.162  | 9.34324E-18 | 2039.58 | 34857.3 | 17.0905  | 2.48361E-18 | 2871.73 | 45575.1 | 15.8703  |
|         |             |         |         |          | 0.00689767  | #DIV/0! | 1322.5  | #DIV/0!  |
|         |             |         |         |          | 0.000897702 | 957.25  | #DIV/0! | #DIV/0!  |

|         |             |         |         |          |             |         |         |          |
|---------|-------------|---------|---------|----------|-------------|---------|---------|----------|
|         | 1.48862E-09 | 3234.95 | 9943.95 | 3.07391  | 2.72189E-10 | 3641.73 | 10367.3 | 2.84682  |
|         | 1.25512E-07 | 2844.13 | 1297.7  | -2.19167 | 2.13238E-07 | 4585.25 | 1372.45 | -3.34092 |
| -3.3833 | 5.17813E-11 | 2638.83 | 441.45  | -5.97763 | 3.28708E-07 | 2415.98 | 735.125 | -3.28648 |
|         |             |         |         |          | 0.00240938  | 538.933 | #DIV/0! | #DIV/0!  |
|         |             |         |         |          | 0.000855452 | 622.733 | #DIV/0! | #DIV/0!  |
|         | 2.71655E-07 | 2361.58 | #DIV/0! | #DIV/0!  |             |         |         |          |
| -2.2441 |             |         |         |          | 0.00636341  | 1342.43 | 299.533 | -4.48172 |
| 9.35905 | 1.07322E-12 | 1222.13 | 8047.7  | 6.58501  | 5.33181E-11 | 1955.6  | 9076.58 | 4.64132  |
|         |             |         |         |          | 4.12965E-05 | 719.05  | #DIV/0! | #DIV/0!  |
|         | 4.72408E-07 | 1092.9  | 291.575 | -3.74826 |             |         |         |          |
|         |             |         |         |          | 0.000482032 | 1339.28 | 663.4   | -2.0188  |
|         |             |         |         |          | 1.743E-07   | 1919.3  | 5883.88 | 3.06564  |
|         | 0.000333586 | 1034.97 | #DIV/0! | #DIV/0!  | 0.000113572 | 2448.13 | 739.25  | -3.31163 |
|         | 0.000841425 | 742.075 | 257.5   | -2.88184 | 0.0141891   | 1450    | 477.867 | -3.03432 |
|         |             |         |         |          | 4.4716E-09  | 2340.47 | 5074.28 | 2.16806  |
|         |             |         |         |          | 9.00616E-09 | 15373.5 | 43286.3 | 2.81564  |
|         |             |         |         |          | 0.00083529  | 1708.2  | 733.025 | -2.33034 |
|         |             |         |         |          | 0.000105616 | 1248.17 | 396.8   | -3.14558 |
|         | 4.09833E-07 | 4499.05 | 10282.7 | 2.28553  | 1.92376E-11 | 3532.08 | 11652.9 | 3.29917  |
|         |             |         |         |          | 1.3043E-07  | 5587.25 | 1629.4  | -3.42902 |
| -2.0356 | 1.91863E-09 | 2215.3  | 811.85  | -2.72871 | 1.25249E-10 | 4250.68 | 1431.35 | -2.9697  |
|         | 5.27639E-07 | 1889.73 | 867.9   | -2.17735 | 4.48433E-08 | 2284.5  | 912.65  | -2.50315 |
|         | 4.65744E-05 | 676.5   | 309.7   | -2.18437 | 9.42425E-06 | 929.35  | 382.9   | -2.42714 |
| -2.3142 |             |         |         |          |             |         |         |          |
|         |             |         |         |          | 3.66969E-09 | 1108.98 | 357.233 | -3.10434 |
|         |             |         |         |          | 0.000293778 | 837.333 | #DIV/0! | #DIV/0!  |
|         | 4.18982E-05 | 26589.1 | 10275.3 | -2.58767 | 1.10012E-08 | 22961.7 | 5085.5  | -4.51514 |
|         |             |         |         |          | 3.68769E-06 | 2977.23 | 1090.98 | -2.72896 |
|         | 3.43287E-05 | 1063.73 | 333.3   | -3.19149 | 1.4097E-07  | 2212.83 | 735.8   | -3.00737 |
|         | 5.07004E-17 | 10151.3 | 53315.4 | 5.2521   | 8.67118E-21 | 5664.05 | 44279.1 | 7.81756  |
|         |             |         |         |          | 9.30225E-05 | 1619.15 | 696.525 | -2.32461 |
|         | 6.50766E-07 | 1744.15 | 831.05  | -2.09873 | 2.26159E-08 | 2373.85 | 988.6   | -2.40122 |
|         | 9.8441E-08  | 2153.25 | 6459.13 | 2.99971  | 3.80772E-10 | #DIV/0! | 4688.9  | #DIV/0!  |
|         |             |         |         |          | 0.018674    | 941.067 | 238     | -3.95406 |
|         |             |         |         |          | 7.89234E-11 | #DIV/0! | 4740    | #DIV/0!  |
|         |             |         |         |          | 8.42047E-10 | #DIV/0! | 4240.55 | #DIV/0!  |
|         |             |         |         |          | 9.93794E-06 | #DIV/0! | 2674.17 | #DIV/0!  |
|         |             |         |         |          | 0.0176691   | 1863.85 | 852.975 | -2.18512 |
|         |             |         |         |          | 3.57736E-05 | 869.933 | #DIV/0! | #DIV/0!  |
|         |             |         |         |          | 0.0199143   | 760.25  | 250.6   | -3.03372 |
|         |             |         |         |          | 0.00228659  | 759.4   | #DIV/0! | #DIV/0!  |
| -2.3077 | 3.62717E-05 | 2319.25 | 952.3   | -2.43542 |             |         |         |          |
|         | 0.000011724 | 1560.55 | 690.4   | -2.26036 |             |         |         |          |
|         | 0.0065566   | 524.6   | 234.433 | -2.23774 |             |         |         |          |
|         |             |         |         |          | 0.00226342  | 9472.13 | 1643.03 | -5.76505 |
|         | 0.000285697 | #DIV/0! | 3643.3  | #DIV/0!  |             |         |         |          |
|         |             |         |         |          | 5.14965E-18 | 2408.03 | 8826.93 | 3.66563  |
|         |             |         |         |          | 9.77866E-21 | 5060.3  | 26914.8 | 5.31882  |
|         |             |         |         |          | 3.26975E-12 | 1166.07 | 7010.08 | 6.01173  |
|         |             |         |         |          | 0.000684958 | 1476.03 | #DIV/0! | #DIV/0!  |
|         | 0.000912239 | 681.4   | 267.933 | -2.54317 | 0.0063201   | 1533.53 | 442.167 | -3.46822 |
|         |             |         |         |          | 0.00439729  | 2415.23 | 561     | -4.30521 |
|         | 0.000113244 | 551.375 | #DIV/0! | #DIV/0!  | 0.00145144  | 1113.18 | 517.5   | -2.15106 |
|         | 0.00266765  | 793.65  | 341     | -2.32742 |             |         |         |          |
| -2.0922 |             |         |         |          | 0.000611901 | 2855.23 | 1425.5  | -2.00296 |
|         |             |         |         |          | 1.83422E-06 | 2251.08 | 4862.93 | 2.16027  |
|         | 5.80118E-06 | 5462.43 | 2201.85 | -2.48083 | 2.84976E-08 | 4873.83 | 1536.23 | -3.1726  |
|         |             |         |         |          | 0.000492066 | 6003.57 | 2797.53 | -2.14603 |
|         | 0.000193125 | 5286.55 | 1949.65 | -2.71154 |             |         |         |          |
|         | 0.0010293   | 2000.88 | 855.15  | -2.33979 |             |         |         |          |
|         |             |         |         |          | 0.000014813 | 820.433 | 297.9   | -2.75406 |



|         |             |         |         |          |             |         |         |          |
|---------|-------------|---------|---------|----------|-------------|---------|---------|----------|
|         | 0.000107362 | 1400.27 | 344.267 | -4.06739 | 0.000198864 | 2348.18 | 1076.55 | -2.1812  |
|         |             |         |         |          | 1.43791E-09 | 21020.7 | 50518.6 | 2.40328  |
|         | 3.05828E-05 | 1205.28 | 2649.13 | 2.19794  | 1.08876E-12 | 595.033 | 2629.4  | 4.41891  |
|         | 4.9005E-08  | 1207.68 | 506.925 | -2.38235 | 4.82182E-08 | 1688.15 | 690.975 | -2.44314 |
|         |             |         |         |          | 0.00907819  | 2087.7  | 908.75  | -2.29733 |
|         | 1.26879E-08 | 5401.5  | 11393.4 | 2.1093   | 2.61187E-15 | 2186.13 | 8515.2  | 3.8951   |
|         | 0.0133036   | 328.5   | 724.7   | 2.20609  |             |         |         |          |
|         |             |         |         |          | 0.00250129  | 950.9   | 305.75  | -3.11006 |
| -2.8645 | 0.000501758 | 1152.3  | 419.1   | -2.74946 |             |         |         |          |
|         |             |         |         |          | 0.0109792   | #DIV/0! | 955.575 | #DIV/0!  |
| -2.037  |             |         |         |          |             |         |         |          |
|         |             |         |         |          | 3.81715E-05 | #DIV/0! | 2131.9  | #DIV/0!  |
| -2.334  | 4.3627E-09  | 3153.9  | 1022.9  | -3.08329 | 9.54476E-09 | 2570.8  | 934.4   | -2.75128 |
|         | 4.69074E-05 | 1217.75 | #DIV/0! | #DIV/0!  | 1.25299E-12 | 2322.28 | #DIV/0! | #DIV/0!  |
| -2.7598 | 3.15114E-05 | 757.95  | 275.1   | -2.75518 |             |         |         |          |
| -2.3053 |             |         |         |          |             |         |         |          |
|         |             |         |         |          | 4.83076E-06 | 1709.3  | 638.125 | -2.67863 |
|         |             |         |         |          | 0.0107915   | 1746.73 | 499     | -3.50047 |
|         |             |         |         |          | 0.00092214  | 1062.93 | 529.125 | -2.00884 |
|         |             |         |         |          | 7.59063E-05 | 1404.43 | 672.8   | -2.08743 |
| -2.9805 |             |         |         |          |             |         |         |          |
| -3.0207 | 3.70461E-06 | 2074.27 | 685.55  | -3.0257  |             |         |         |          |
| -2.3988 | 0.000350854 | 2141    | 943.3   | -2.26969 | 5.76319E-06 | 1858.85 | 746.3   | -2.49075 |
| 37.2678 | 2.39005E-18 | 664.867 | 16850.6 | 25.3443  | 8.99856E-17 | 1224.25 | 17634.7 | 14.4045  |
| -2.208  |             |         |         |          |             |         |         |          |
|         |             |         |         |          | 1.06582E-08 | 2596.7  | 5707.63 | 2.19803  |
|         |             |         |         |          | 3.48591E-06 | 3250.88 | 1170.3  | -2.77781 |
|         |             |         |         |          | 2.82055E-05 | 4269.13 | 1643.33 | -2.59786 |
|         | 9.17694E-06 | 973.325 | 468.767 | -2.07635 | 2.29576E-05 | 1661.43 | 828.267 | -2.00592 |
|         | 1.62073E-05 | 787.15  | 279.8   | -2.81326 | 9.55163E-06 | 1210.58 | 426.2   | -2.84039 |
|         |             |         |         |          | 0.0167799   | #DIV/0! | 1030.08 | #DIV/0!  |
|         |             |         |         |          | 0.000164925 | 2027.43 | 919.95  | -2.20384 |
| 2.37425 | 1.44145E-08 | 3695.48 | 8480.48 | 2.29483  |             |         |         |          |
|         | 0.000142225 | 636.9   | 136.25  | -4.6745  |             |         |         |          |
|         | 0.000137998 | 588.3   | #DIV/0! | #DIV/0!  |             |         |         |          |
|         |             |         |         |          | 0.0152699   | #DIV/0! | 758.325 | #DIV/0!  |
|         | 6.09746E-06 | 1178.83 | 322.9   | -3.65077 | 0.00196634  | 1431.45 | 537.4   | -2.66366 |
|         |             |         |         |          | 6.24301E-06 | 1425    | 400.85  | -3.55495 |
|         |             |         |         |          | 0.000506548 | 1862.35 | 655.6   | -2.84068 |
|         |             |         |         |          | 0.0068231   | 1586.47 | 379.6   | -4.17931 |
|         | 0.00777235  | 824.05  | 378.05  | -2.17974 |             |         |         |          |
| 3.65102 | 0.000443597 | #DIV/0! | 2638.95 | #DIV/0!  |             |         |         |          |
| 2.02816 | 1.24145E-06 | 663.4   | 1519.2  | 2.29002  | 3.14466E-07 | #DIV/0! | 1902.97 | #DIV/0!  |
|         |             |         |         |          | 0.000625886 | #DIV/0! | 1625.9  | #DIV/0!  |
|         |             |         |         |          | 0.000215266 | 1165.05 | 464.8   | -2.50656 |
|         |             |         |         |          | 0.00867538  | 1702.18 | 725.65  | -2.34572 |
|         | 1.78226E-08 | 2149.08 | 563.8   | -3.81177 | 0.000314105 | 2492.35 | 1187.8  | -2.09829 |
|         |             |         |         |          | 0.00324629  | 1237.78 | 595.9   | -2.07715 |
| -2.6551 | 1.98051E-06 | 1760.73 | 614.9   | -2.86345 |             |         |         |          |
|         |             |         |         |          | 0.00390479  | 916.133 | 438.6   | -2.08877 |
|         |             |         |         |          | 9.81972E-05 | 1171.83 | 498     | -2.35308 |
|         |             |         |         |          | 0.00124458  | 1510.38 | 526.3   | -2.8698  |
| -3.5887 | 4.05406E-08 | 966.8   | 264.1   | -3.66073 |             |         |         |          |
| -2.3455 |             |         |         |          |             |         |         |          |
|         |             |         |         |          | 9.509E-12   | 4429.23 | 21988.4 | 4.9644   |
| 2.17922 | 1.35826E-09 | 4844.85 | 29153.8 | 6.01748  | 8.95564E-10 | 2149.5  | 13708.9 | 6.37772  |
|         | 0.00227858  | 1864.78 | 5468.35 | 2.93244  |             |         |         |          |
|         | 0.000421784 | 989.15  | 425.4   | -2.32522 |             |         |         |          |
|         |             |         |         |          | 0.00302253  | 1444.03 | 526.933 | -2.74043 |
| 2.02922 | 1.15692E-06 | 3119.4  | 8628.8  | 2.76617  |             |         |         |          |
| 3.96857 | 6.99542E-08 | 1139.55 | 4118.08 | 3.61377  | 0.00001166  | 1662.68 | 4326.3  | 2.60201  |

|         |             |         |         |          |             |         |         |          |
|---------|-------------|---------|---------|----------|-------------|---------|---------|----------|
|         |             |         |         |          | 0.0139627   | 966.625 | 409     | -2.36339 |
|         |             |         |         |          | 0.0114215   | 1070.7  | 424.125 | -2.52449 |
|         | 2.75905E-05 | 1257.43 | 394.225 | -3.18961 |             |         |         |          |
|         | 0.00955086  | 580.833 | 284.8   | -2.03944 | 0.00256148  | 935.5   | 357.6   | -2.61605 |
|         | 0.0118973   | 1120.9  | 364     | -3.0794  |             |         |         |          |
| -4.2934 | 8.69707E-07 | 3398.15 | 504.3   | -6.73835 |             |         |         |          |
| -3.6492 | 0.000004307 | 1864.95 | 421.1   | -4.42876 |             |         |         |          |
|         |             |         |         |          | 3.54227E-06 | 1727.93 | 3495.58 | 2.02298  |
| -2.0954 |             |         |         |          |             |         |         |          |
|         | 1.08418E-06 | 3020.88 | 907.025 | -3.33053 | 7.17659E-07 | 2444.15 | 999.6   | -2.44513 |
|         | 6.22071E-05 | 3222.93 | 902.175 | -3.57239 |             |         |         |          |
|         | 1.52016E-06 | 1030.05 | 354.9   | -2.90237 |             |         |         |          |
|         |             |         |         |          | 0.000350471 | 4121.75 | 1971.25 | -2.09093 |
|         |             |         |         |          | 0.0010099   | 1065.23 | 402.9   | -2.64389 |
|         | 0.00659343  | 1204.33 | #DIV/0! | #DIV/0!  | 0.003201    | 2870.87 | 1063.8  | -2.69869 |
|         |             |         |         |          | 0.000758774 | 1632.73 | 748.2   | -2.1822  |
|         |             |         |         |          | 0.00571715  | 1847.4  | 466.233 | -3.96239 |
|         | 0.000586807 | 629.725 | 272.725 | -2.30901 | 4.00174E-06 | 1252.13 | 339     | -3.69358 |
|         |             |         |         |          | 0.0162289   | 1025.13 | 390.4   | -2.62583 |
|         |             |         |         |          | 0.00311018  | 980.8   | #DIV/0! | #DIV/0!  |
|         |             |         |         |          | 0.000392618 | #DIV/0! | 5776.93 | #DIV/0!  |
|         |             |         |         |          | 0.00124632  | 1798.2  | 742.475 | -2.4219  |
|         |             |         |         |          | 2.95647E-13 | 3976.73 | 11783.9 | 2.9632   |
|         |             |         |         |          | 0.000150279 | 1545.2  | 271.7   | -5.68715 |
|         | 7.31361E-05 | 3373.58 | 1549.2  | -2.17762 | 1.07712E-06 | 3771.98 | 1423.85 | -2.64914 |
| -2.1627 | 0.000001846 | 2741.93 | 1258.1  | -2.17942 | 3.41857E-07 | 3748.73 | 1570.3  | -2.38727 |
|         | 0.000337684 | 958.233 | 247.333 | -3.87426 |             |         |         |          |
|         | 4.97899E-08 | 4234.4  | 9327.33 | 2.20275  | 4.31796E-11 | 2902.55 | 6826.43 | 2.35187  |
|         |             |         |         |          | 2.38888E-05 | #DIV/0! | 1128.55 | #DIV/0!  |
| -2.2199 |             |         |         |          |             |         |         |          |
| #DIV/0! |             |         |         |          |             |         |         |          |
|         |             |         |         |          | 3.26803E-05 | 2605.23 | 6959.45 | 2.67134  |
|         |             |         |         |          | 6.88766E-05 | #DIV/0! | 6504.55 | #DIV/0!  |
| -2.3141 | 7.6157E-10  | 3790.55 | 1386.53 | -2.73385 | 1.88626E-06 | 3734.95 | 1866.15 | -2.00142 |
| -2.0746 | 0.000236993 | 4376.45 | 1792.63 | -2.44136 |             |         |         |          |
| -3.039  | 7.63043E-12 | 4824.88 | 1446.55 | -3.33544 |             |         |         |          |
| #DIV/0! |             |         |         |          |             |         |         |          |
| #DIV/0! |             |         |         |          |             |         |         |          |
|         |             |         |         |          | 0.000768778 | 930.767 | 253.75  | -3.66805 |
|         |             |         |         |          | 0.000223887 | 1338    | 431.2   | -3.10297 |
|         |             |         |         |          | 0.00280536  | 1067.78 | 479.6   | -2.22639 |
|         |             |         |         |          | 0.000290296 | 1157.77 | 504.2   | -2.29624 |
| 2.26892 | 0.000596432 | 1923.6  | 4597.35 | 2.38997  | 0.000577395 | 1153.9  | 2721.93 | 2.35889  |
| 2.1774  | 5.37678E-10 | 4604.15 | 18054   | 3.92123  | 5.75906E-09 | 3364.9  | 11149   | 3.31332  |
|         | 1.72505E-06 | 9760.58 | 28393.2 | 2.90897  | 1.10041E-06 | 5433.5  | 18229.1 | 3.35494  |
|         |             |         |         |          | 1.74184E-10 | 4258.9  | 9679.33 | 2.27273  |
|         | 1.92143E-06 | 5548.68 | #DIV/0! | #DIV/0!  | 1.9727E-13  | 16284.8 | #DIV/0! | #DIV/0!  |
| -2.2994 |             |         |         |          |             |         |         |          |
|         | 0.000249491 | 1293.85 | 430.2   | -3.00755 | 5.77635E-06 | 3220.2  | 771.575 | -4.17354 |
|         |             |         |         |          | 0.00936395  | 1206.63 | 393.9   | -3.0633  |
|         | 4.06253E-05 | 806.325 | 309.125 | -2.60841 | 3.59922E-08 | 2958.88 | 611.05  | -4.84228 |
|         |             |         |         |          | 6.1153E-06  | 2071.93 | 707.875 | -2.92696 |
|         |             |         |         |          | 0.00166642  | 1182.33 | 574.925 | -2.0565  |
|         |             |         |         |          | 1.28764E-11 | 2880.8  | 6629.93 | 2.30142  |
|         |             |         |         |          | 1.84595E-12 | #DIV/0! | 6240.73 | #DIV/0!  |
|         |             |         |         |          | 2.1257E-06  | #DIV/0! | 2703.78 | #DIV/0!  |
|         | 6.73916E-06 | 12757.1 | 34127.9 | 2.67522  | 5.00189E-11 | 11318.9 | 55946.9 | 4.94277  |
|         | 9.21921E-05 | 4488.3  | 12577.2 | 2.80222  | 2.92484E-10 | 2863.25 | 20903.9 | 7.30074  |
|         | 2.11386E-06 | 5220.63 | 19901.1 | 3.81202  | 1.47924E-12 | 3146.3  | 29391.4 | 9.34157  |
|         | 4.57333E-06 | 4106.65 | 18909.3 | 4.60454  | 1.04626E-10 | 2388.05 | 26556.4 | 11.1205  |
|         |             |         |         |          | 0.00330443  | 1143.43 | 487.65  | -2.34477 |
|         |             |         |         |          | 0.00792505  | 4890.3  | 1054.2  | -4.63887 |
|         |             |         |         |          | 0.0103938   | 5508.75 | 1183.63 | -4.65413 |

|         |             |         |         |          |             |         |         |          |
|---------|-------------|---------|---------|----------|-------------|---------|---------|----------|
|         |             |         |         |          | 0.00110312  | 1397.1  | 600.067 | -2.32824 |
|         | 0.000713568 | 1073.77 | 314.7   | -3.41203 |             |         |         |          |
|         | 6.24956E-09 | 3060.3  | 6683.75 | 2.18402  | 6.83762E-13 | 2051.28 | 5981.7  | 2.91609  |
|         | 6.87728E-09 | 3388.18 | 10534.1 | 3.10908  | 2.94538E-11 | 1991.78 | 7175.48 | 3.60255  |
|         |             |         |         |          | 0.0222871   | 1162.63 | 432.3   | -2.68941 |
|         |             |         |         |          | 9.53382E-08 | 2549.25 | 980.45  | -2.60008 |
|         |             |         |         |          | 0.000259198 | 1176.75 | 457.25  | -2.57354 |
|         |             |         |         |          | 1.64727E-07 | 2883.85 | 6401.03 | 2.21961  |
| -2.5996 | 1.09853E-07 | 1470.6  | 556.95  | -2.64045 | 3.62898E-06 | 2390.83 | 1004    | -2.3813  |
|         |             |         |         |          | 9.06403E-05 | 5556.33 | 974.2   | -5.70347 |
|         |             |         |         |          | 1.14247E-13 | 11884.5 | 34642.8 | 2.91496  |
|         | 0.0002532   | 6013.5  | 2837.18 | -2.11954 |             |         |         |          |
|         |             |         |         |          | 1.25729E-12 | 5304.03 | 11958.3 | 2.25457  |
|         |             |         |         |          | 7.09353E-07 | #DIV/0! | 1277.5  | #DIV/0!  |
| -2.45   | 6.34503E-07 | 3272.25 | 976.8   | -3.34997 | 6.7029E-07  | 3829.48 | 1156.6  | -3.31098 |
|         | 6.69163E-11 | 15417.5 | 37354.2 | 2.42285  | 5.84136E-22 | 4775.55 | 31483.3 | 6.5926   |
|         |             |         |         |          | 0.00275505  | 926.75  | 328.55  | -2.82073 |
|         |             |         |         |          | 7.24979E-07 | 3819.43 | 795.8   | -4.79948 |
|         |             |         |         |          | 0.00602771  | 1193.88 | 568.1   | -2.10152 |
| -2.4515 | 7.10459E-10 | 5040.55 | 1877.53 | -2.68468 |             |         |         |          |
|         |             |         |         |          | 0.00182983  | 1320.75 | 468.7   | -2.8179  |
|         | 0.000263961 | 20013.8 | 9134.9  | -2.19091 |             |         |         |          |
|         |             |         |         |          | 0.00378241  | #DIV/0! | 2727.45 | #DIV/0!  |
| 2.29151 | 8.33091E-16 | 4414.45 | 29852.5 | 6.76245  | 4.78177E-15 | 5087.53 | 27358.9 | 5.37764  |
| 4.08089 | 9.26605E-15 | 2293.1  | 20714.5 | 9.03342  | 1.891E-15   | 2556.2  | 21215.1 | 8.29945  |
|         | 0.00033072  | 2967.95 | 6200.78 | 2.08925  |             |         |         |          |
|         | 1.71143E-06 | 15353.6 | 4882.35 | -3.14472 | 2.29648E-09 | 17299.6 | 3759.13 | -4.60202 |
|         | 1.0223E-06  | 44958.3 | 17103.6 | -2.62859 | 1.10891E-10 | 54210.2 | 12697.6 | -4.26932 |
|         | 6.48216E-05 | 3775.88 | 1302.93 | -2.898   | 0.00119327  | 3916.53 | 1746.55 | -2.24244 |
|         |             |         |         |          | 0.00044441  | 1300.97 | 401.3   | -3.24188 |
|         |             |         |         |          | 0.00873196  | 756.633 | 314.7   | -2.4043  |
|         |             |         |         |          | 0.00502806  | 676.85  | #DIV/0! | #DIV/0!  |
|         | 6.51519E-06 | 2820.08 | 5903.65 | 2.09344  | 1.03967E-08 | 2405.63 | 6197.08 | 2.57608  |
|         |             |         |         |          | 0.00214217  | #DIV/0! | 555.933 | #DIV/0!  |
|         |             |         |         |          | 4.19336E-05 | 6978.95 | 14386.5 | 2.06141  |
|         |             |         |         |          | 0.000324085 | 3169.2  | 7057.43 | 2.22688  |
|         |             |         |         |          | 9.77055E-07 | 964.933 | 2596.93 | 2.6913   |
| -2.544  | 7.23033E-06 | 1247.2  | 464.45  | -2.68533 | 1.09483E-05 | 1654.18 | 632.8   | -2.61406 |
| -2.5702 | 7.82026E-05 | 4745.88 | 1999.55 | -2.37347 |             |         |         |          |
|         |             |         |         |          | 2.28892E-06 | 4051.23 | 8780.55 | 2.16738  |
|         |             |         |         |          | 4.84931E-12 | 10854.2 | 23103.9 | 2.12856  |
|         | 0.000328652 | 1050.5  | 2535.63 | 2.41373  | 1.25504E-05 | #DIV/0! | 1599.33 | #DIV/0!  |
|         | 0.000155045 | 3113.38 | 1459.33 | -2.13343 |             |         |         |          |
| -2.1534 | 0.000105376 | 850.2   | 374.575 | -2.26977 | 9.25342E-05 | 1207.75 | 474.9   | -2.54317 |
| -2.1995 | 0.000016885 | 1951.13 | 942.433 | -2.07031 |             |         |         |          |
| 3.05657 | 5.17277E-09 | 1317.2  | 4466.63 | 3.391    | 3.20468E-07 | 1288.95 | 3581.55 | 2.77866  |
| #DIV/0! | 3.82235E-07 | #DIV/0! | 4296.08 | #DIV/0!  | 3.30876E-08 | #DIV/0! | 3513.8  | #DIV/0!  |
| 4.35183 | 4.73137E-09 | 603.35  | 4072.73 | 6.75019  | 2.9789E-11  | #DIV/0! | 3426.88 | #DIV/0!  |
| #DIV/0! | 4.16534E-05 | #DIV/0! | 1188.6  | #DIV/0!  | 0.0230764   | #DIV/0! | 998.975 | #DIV/0!  |
| -2.1049 | 3.44858E-13 | 1692.18 | 444.85  | -3.80392 | 1.09836E-11 | 2195.58 | 636.475 | -3.44959 |
|         | 3.79334E-06 | 815.825 | 239.75  | -3.40282 | 8.70027E-06 | 1217.33 | 458.9   | -2.6527  |
|         | 5.37433E-06 | 1619.58 | 643.65  | -2.51624 |             |         |         |          |
|         |             |         |         |          | 0.00539178  | 769.675 | 335.35  | -2.29514 |
| -3.9257 |             |         |         |          |             |         |         |          |
|         |             |         |         |          | 8.63862E-09 | 2887.38 | 6048.13 | 2.09468  |
|         | 0.00695387  | 552.65  | #DIV/0! | #DIV/0!  | 0.0103435   | 1267.15 | 466.467 | -2.71649 |
|         |             |         |         |          | 3.83401E-06 | 1465.2  | 434.15  | -3.37487 |
| -2.9902 | 1.27252E-06 | 1134.28 | 300.7   | -3.77212 | 1.28104E-07 | 1885.7  | #DIV/0! | #DIV/0!  |
|         |             |         |         |          | 0.000419203 | 2512.98 | 659.025 | -3.81317 |
|         | 7.37374E-07 | 1208.3  | 333.575 | -3.62227 | 3.43071E-06 | 2542.8  | 779.55  | -3.26188 |



|         |             |         |         |          |             |         |         |          |
|---------|-------------|---------|---------|----------|-------------|---------|---------|----------|
|         |             |         |         |          | 7.83469E-05 | 835.275 | 272.3   | -3.06748 |
|         |             |         |         |          | 0.00110062  | 599.85  | 229.133 | -2.61791 |
|         |             |         |         |          | 3.00883E-13 | 5658.58 | 15372.7 | 2.71671  |
|         |             |         |         |          | 0.000303019 | 2649.98 | 1292.3  | -2.05059 |
|         | 1.17817E-06 | 17402.8 | 37275.7 | 2.14194  | 9.02231E-13 | 10566.5 | 44430.6 | 4.20486  |
|         | 4.80592E-07 | 16047.3 | 37993.3 | 2.36758  | 6.83544E-15 | 7447.9  | 42534.8 | 5.71097  |
|         | 0.00789782  | 764.4   | 317.9   | -2.40453 |             |         |         |          |
|         |             |         |         |          | 2.84739E-07 | #DIV/0! | 4965.73 | #DIV/0!  |
|         |             |         |         |          | 0.022984    | #DIV/0! | 1446.93 | #DIV/0!  |
| -2.4942 |             |         |         |          | 9.06621E-10 | 3126.88 | 8291.6  | 2.65172  |
| -3.5059 |             |         |         |          | 4.70011E-05 | #DIV/0! | 2309.58 | #DIV/0!  |
| -2.5164 | 1.72119E-07 | 13238.9 | 6223.03 | -2.12741 |             |         |         |          |
| -3.3968 |             |         |         |          |             |         |         |          |
|         | 8.8143E-08  | 712.025 | 1876.65 | 2.63565  |             |         |         |          |
| -3.0738 | 2.55146E-10 | 3962.8  | 1011.47 | -3.91788 | 4.37103E-11 | 2732.7  | 711.033 | -3.84328 |
| -3.5031 | 6.00454E-09 | 4405.45 | 1425.5  | -3.09046 | 5.58848E-09 | 2047    | 641.925 | -3.18885 |
| -2.8548 | 3.01517E-12 | 6248.33 | 1853.33 | -3.37141 | 1.64063E-12 | 3365.65 | 1234.43 | -2.72647 |
| -2.395  | 2.68888E-10 | 4582.63 | 1374.13 | -3.33494 |             |         |         |          |
| -2.2582 |             |         |         |          |             |         |         |          |
|         |             |         |         |          | 0.000204375 | 9522.53 | 28533.4 | 2.99641  |
|         |             |         |         |          | 1.54188E-07 | 11128.8 | 45350.2 | 4.07504  |
|         | 0.00853153  | 941.825 | 402.8   | -2.3382  | 1.85106E-05 | 1478.57 | 354.6   | -4.16967 |
|         |             |         |         |          |             |         |         |          |
|         |             |         |         |          | 0.000057723 | 3411.33 | 1175.4  | -2.90227 |
|         | 0.00377591  | 794.7   | 305.65  | -2.60003 | 0.0167463   | 1950.03 | 710.4   | -2.74497 |
| 3.39741 | 6.20669E-07 | 10130.3 | 54545.6 | 5.38438  | 4.4766E-11  | 4945.75 | 60029.4 | 12.1376  |
|         |             |         |         |          | 5.00616E-07 | #DIV/0! | 2314    | #DIV/0!  |
|         | 0.000214319 | 2050.58 | 655.975 | -3.126   |             |         |         |          |
|         | 0.000142814 | 726.933 | 325.7   | -2.23191 |             |         |         |          |
| -2.3824 | 3.64173E-08 | 1450.2  | 569.5   | -2.54644 |             |         |         |          |
|         | 0.000223825 | 2852.68 | 1340.17 | -2.1286  |             |         |         |          |
| -2.6676 | 2.63098E-09 | 2237.95 | 546     | -4.09881 |             |         |         |          |
|         |             |         |         |          |             |         |         |          |
|         |             |         |         |          | 7.60469E-07 | 1907.6  | 5281.58 | 2.7687   |
|         |             |         |         |          | 0.00216436  | 1005.95 | #DIV/0! | #DIV/0!  |
|         |             |         |         |          | 0.00639241  | #DIV/0! | 4279.25 | #DIV/0!  |
|         |             |         |         |          | 6.34266E-10 | 4296.48 | 12419   | 2.89051  |
|         |             |         |         |          | 1.22458E-07 | 3625.45 | 799.1   | -4.53692 |
|         |             |         |         |          | 9.88264E-06 | 2443.5  | 1107.33 | -2.20667 |
| #DIV/0! | 9.47776E-05 | #DIV/0! | 2531.65 | #DIV/0!  | 0.001114    | #DIV/0! | 2770.03 | #DIV/0!  |
|         | 0.00926743  | #DIV/0! | 1922.9  | #DIV/0!  | 0.000312741 | #DIV/0! | 2329.75 | #DIV/0!  |
|         |             |         |         |          | 2.12807E-05 | 8016.75 | 2963.85 | -2.70484 |
|         |             |         |         |          | 1.09987E-05 | 19842.6 | 7443.18 | -2.66588 |
|         |             |         |         |          | 3.20218E-05 | 5699.25 | 2186.25 | -2.60686 |
|         |             |         |         |          | 3.72452E-05 | 22430   | 8722.88 | -2.5714  |
|         |             |         |         |          | 0.000407194 | 3241.5  | 1354.58 | -2.393   |
|         |             |         |         |          | 0.00567703  | 1811.93 | 727.05  | -2.49217 |
|         |             |         |         |          | 2.20666E-05 | 1465.25 | 408.65  | -3.58559 |
|         |             |         |         |          | 0.000553331 | 4783.28 | 1530.3  | -3.12571 |
|         |             |         |         |          | 1.54616E-14 | #DIV/0! | 3241.23 | #DIV/0!  |
| 2.81182 | 1.94707E-06 | 36420.4 | 110950  | 3.04635  | 4.04184E-11 | 24508.1 | 142648  | 5.82045  |
| 3.95955 | 7.62319E-09 | 11265.7 | 57862.2 | 5.13613  | 3.43905E-13 | 6240.58 | 70098.5 | 11.2327  |
|         |             |         |         |          |             |         |         |          |
| -4.6013 | 2.58523E-10 | 27219.3 | 3582.63 | -7.59757 | 7.12758E-10 | 9893.05 | 1567.25 | -6.31236 |
|         | 0.00746834  | 593.2   | #DIV/0! | #DIV/0!  | 0.00627476  | 1251.63 | 444.5   | -2.81582 |
|         | 0.00197648  | 587.025 | #DIV/0! | #DIV/0!  |             |         |         |          |
|         | 0.000598261 | 1330.23 | #DIV/0! | #DIV/0!  | 1.28861E-06 | 3743.78 | 919.1   | -4.07331 |
|         |             |         |         |          | 0.00299501  | 1472.77 | 476.6   | -3.09015 |
|         |             |         |         |          | 0.00127132  | 2559.93 | 1139.3  | -2.24693 |
|         |             |         |         |          | 0.00129704  | 3413.15 | 954.075 | -3.57744 |
|         |             |         |         |          | 0.00341044  | 3380.85 | 1330.43 | -2.54118 |
|         |             |         |         |          | 0.00987901  | 893.75  | 407.4   | -2.19379 |
|         |             |         |         |          |             |         |         |          |
|         | 0.00961837  | 2753.2  | 6203.95 | 2.25336  |             |         |         |          |
| 2.07029 | 0.000804538 | 3532.33 | 8958.63 | 2.53618  |             |         |         |          |

|         |             |         |         |          |             |         |         |          |
|---------|-------------|---------|---------|----------|-------------|---------|---------|----------|
| 2.25344 | 0.000637704 | 3488.25 | 9264.53 | 2.65592  |             |         |         |          |
|         | 0.000745579 | 2921.13 | 7860.68 | 2.69098  |             |         |         |          |
|         | 0.000138948 | 2682.03 | 8197.05 | 3.05629  |             |         |         |          |
| -2.019  |             |         |         |          |             |         |         |          |
|         | 7.50731E-05 | 13312.4 | 39212   | 2.94552  |             |         |         |          |
|         | 0.000273802 | 5408.37 | 1112.6  | -4.86102 |             |         |         |          |
|         |             |         |         |          | 5.74675E-11 | 5679.05 | 1732.08 | -3.27876 |
|         |             |         |         |          | 1.56559E-05 | 11495.3 | 39263.3 | 3.41559  |
|         |             |         |         |          | 2.15015E-05 | 8609.25 | 1651.83 | -5.21196 |
|         |             |         |         |          | 5.03273E-05 | 7594.33 | 2442.4  | -3.10937 |
|         |             |         |         |          | 1.46591E-09 | 2440.95 | 5281.35 | 2.16365  |
|         |             |         |         |          | 7.37903E-09 | 32806.2 | 84504.8 | 2.57588  |
|         |             |         |         |          | 9.45386E-07 | 7434.8  | 30109.7 | 4.04983  |
|         |             |         |         |          | 4.7616E-08  | 6570.38 | 26796   | 4.0783   |
|         |             |         |         |          | 1.49595E-08 | 4891.95 | 24580.1 | 5.02459  |
|         | 4.55381E-10 | 2062.58 | 5646.45 | 2.73757  | 9.50032E-15 | 1485.4  | 4060.85 | 2.73384  |
|         |             |         |         |          | 2.15587E-14 | 10177.7 | 39456.1 | 3.87674  |
|         | 9.0075E-10  | 11821.2 | 29187   | 2.46905  | 6.85778E-15 | 4851.18 | 19126.5 | 3.94264  |
|         | 7.06231E-09 | 14774.4 | 33461.8 | 2.26485  | 3.56259E-15 | 5649.28 | 23026.8 | 4.07607  |
|         | 2.85132E-09 | 32147.2 | 78702.4 | 2.44819  | 1.13094E-14 | 21452.3 | 86442.8 | 4.02954  |
|         | 0.0112323   | #DIV/0! | 1278.47 | #DIV/0!  | 0.00031288  | #DIV/0! | 1507.03 | #DIV/0!  |
| 3.105   | 0.00250103  | 956     | 3736.73 | 3.90871  |             |         |         |          |
|         |             |         |         |          | 8.16878E-07 | 9751.33 | 3162.35 | -3.08357 |
|         |             |         |         |          | 1.90343E-06 | 2148.57 | #DIV/0! | #DIV/0!  |
|         |             |         |         |          | 0.002239    | 1336.07 | 531.2   | -2.51519 |
|         |             |         |         |          | 3.34934E-05 | 1788.63 | #DIV/0! | #DIV/0!  |
|         | 0.000105755 | 4055.28 | 1975.1  | -2.0532  |             |         |         |          |
|         |             |         |         |          | 3.436E-09   | 5506.6  | 14028.2 | 2.54752  |
| 4.05767 | 1.25753E-07 | 7632.05 | 30396.6 | 3.98276  | 2.4415E-09  | 6676.48 | 33236.9 | 4.97821  |
|         |             |         |         |          |             |         |         |          |
|         |             |         |         |          | 8.75347E-09 | 3387.88 | #DIV/0! | #DIV/0!  |
|         |             |         |         |          | 0.0171194   | 1099.33 | 485.267 | -2.26542 |
|         |             |         |         |          | 2.46053E-05 | 7421.08 | 32711.6 | 4.40793  |
|         |             |         |         |          | 0.00398662  | 1020.53 | 448.7   | -2.27442 |
|         |             |         |         |          | 1.31036E-05 | 4494.83 | 1461.23 | -3.07607 |
|         |             |         |         |          | 4.46781E-07 | 4149.8  | 14416.2 | 3.47394  |
|         | 1.5267E-07  | 922.75  | 2177.98 | 2.36031  |             |         |         |          |
|         |             |         |         |          |             |         |         |          |
| -3.1116 | 9.73565E-09 | 6557.9  | 1645.95 | -3.98426 |             |         |         |          |
|         |             |         |         |          | 4.8207E-08  | 1743.28 | 507.9   | -3.43232 |
|         |             |         |         |          | 8.36303E-05 | 1065.75 | 440.9   | -2.41721 |
|         | 0.00434749  | 1447.73 | 588.5   | -2.46003 |             |         |         |          |
|         | 0.0116595   | 599.833 | #DIV/0! | #DIV/0!  | 9.52939E-05 | 2106.93 | 193.5   | -10.8885 |
|         | 0.00022905  | 811.2   | 337.85  | -2.40107 | 0.000110682 | 1246.73 | 477.725 | -2.60971 |
|         | 5.16085E-06 | 1100.93 | 396.2   | -2.77871 | 6.89115E-05 | 1625.5  | 631.025 | -2.57597 |
|         |             |         |         |          | 4.70066E-05 | 1847.7  | #DIV/0! | #DIV/0!  |
|         | 6.42353E-08 | 5344.85 | 12929.9 | 2.41914  | 3.48355E-12 | 3865.3  | 14362.6 | 3.71577  |
|         |             |         |         |          | 3.2547E-10  | 4822    | 1571.63 | -3.06816 |
|         |             |         |         |          | 1.85036E-05 | 8910.68 | 3041.18 | -2.93001 |
|         |             |         |         |          | 1.39696E-12 | 2078.03 | 5263.25 | 2.5328   |
|         |             |         |         |          | 1.18659E-09 | #DIV/0! | 3258.28 | #DIV/0!  |
|         |             |         |         |          | 2.68838E-09 | #DIV/0! | 4644.05 | #DIV/0!  |
|         |             |         |         |          | 1.67751E-10 | 6427.6  | 15344.1 | 2.38722  |
| -2.0726 | 1.98641E-07 | 4044.75 | 1793.38 | -2.25538 |             |         |         |          |
|         | 6.1671E-07  | 1384    | 624.425 | -2.21644 |             |         |         |          |
|         |             |         |         |          | 2.58635E-06 | 2518.93 | 5431.88 | 2.15643  |
|         |             |         |         |          | 4.77488E-07 | #DIV/0! | 3546.3  | #DIV/0!  |
|         |             |         |         |          | 0.0143858   | 848.525 | 289.833 | -2.92763 |
| 2.01625 | 7.04298E-07 | 16600.4 | 48670.6 | 2.9319   |             |         |         |          |
| 2.67225 | 7.84823E-06 | 4074.5  | 13948   | 3.42325  |             |         |         |          |
|         |             |         |         |          | 4.28701E-11 | 1855.4  | 4483.48 | 2.41645  |
|         | 0.00545524  | 960.425 | #DIV/0! | #DIV/0!  | 9.26503E-05 | 2264    | #DIV/0! | #DIV/0!  |
|         | 2.13303E-05 | 606.2   | #DIV/0! | #DIV/0!  |             |         |         |          |
|         | 0.00241011  | 1625.78 | 617.7   | -2.63198 |             |         |         |          |
|         | 0.000592784 | 568.025 | 189.4   | -2.99908 |             |         |         |          |

#DIV/0!

|         |             |         |         |          |             |         |         |          |  |
|---------|-------------|---------|---------|----------|-------------|---------|---------|----------|--|
|         |             |         |         |          | 2.09178E-06 | 1865.6  | 515.3   | -3.62042 |  |
|         |             |         |         |          | 0.010215    | 1812.4  | 554.333 | -3.26951 |  |
|         |             |         |         |          | 0.000261797 | 2816.83 | 1093.88 | -2.5751  |  |
|         |             |         |         |          | 0.00365102  | #DIV/0! | 646.433 | #DIV/0!  |  |
|         | 0.0102467   | 1114.73 | #DIV/0! | #DIV/0!  | 0.0119499   | 2496.07 | #DIV/0! | #DIV/0!  |  |
|         |             |         |         |          | 0.0141992   | 1589.05 | 344     | -4.61933 |  |
|         |             |         |         |          | 0.00546372  | 1306.8  | #DIV/0! | #DIV/0!  |  |
| -2.1575 | 1.98952E-07 | 24371.5 | 9415.6  | -2.58842 |             |         |         |          |  |
| 2.92435 | 6.33005E-09 | 863.275 | 4231.95 | 4.9022   |             |         |         |          |  |
| 4.15437 | 2.43254E-06 | 354.6   | 1854.88 | 5.23089  |             |         |         |          |  |
| -2.6809 | 1.18638E-09 | 3878.8  | 913.375 | -4.24667 | 1.55407E-08 | 3718.13 | 1115.58 | -3.33292 |  |
|         | 0.00464154  | 1825.48 | 685.9   | -2.66143 |             |         |         |          |  |
|         |             |         |         |          | 0.00458061  | 751.933 | 359.9   | -2.08928 |  |
| #DIV/0! |             |         |         |          |             |         |         |          |  |
|         | 3.61725E-05 | 4188.58 | 8561.73 | 2.04407  | 2.3473E-08  | 2242.2  | 6492.18 | 2.89545  |  |
|         |             |         |         |          | 0.0011912   | 869.867 | 297.5   | -2.92392 |  |
|         |             |         |         |          | 0.00211895  | 2480.53 | 452     | -5.48789 |  |
| 4.12642 | 1.93835E-06 | 2588.88 | 32598.8 | 12.5919  | 3.51939E-06 | 2582.97 | 19035.3 | 7.36956  |  |
|         | 0.000157428 | 726.167 | #DIV/0! | #DIV/0!  |             |         |         |          |  |
|         |             |         |         |          | 0.0062461   | 1306.73 | 545.4   | -2.39592 |  |
| -2.2906 |             |         |         |          |             |         |         |          |  |
|         |             |         |         |          | 8.50456E-09 | 2683.5  | 6549.3  | 2.44058  |  |
| -2.4842 |             |         |         |          |             |         |         |          |  |
|         | 0.000146534 | 660.175 | 238.125 | -2.77239 | 0.00231593  | 1059.8  | 416.55  | -2.54423 |  |
| -2.0519 |             |         |         |          | 3.5775E-14  | 6561.33 | 1007.5  | -6.51249 |  |
|         | 8.6289E-06  | 3337.98 | 1277.8  | -2.61228 | 4.23766E-09 | 6904.55 | 1598.35 | -4.3198  |  |
|         | 9.25962E-09 | 6267.48 | 1876.1  | -3.34069 | 8.82951E-15 | 17133.3 | 2087.5  | -8.20756 |  |
|         | 9.11056E-05 | 2182.9  | 499.133 | -4.37338 |             |         |         |          |  |
|         |             |         |         |          | 4.20947E-10 | 38507.5 | 121471  | 3.15447  |  |
| -3.6074 | 0.000192504 | 26627.3 | 10382.9 | -2.56454 |             |         |         |          |  |
| -4.2132 |             |         |         |          |             |         |         |          |  |
|         |             |         |         |          | 1.33101E-06 | 3485.55 | 1340    | -2.60116 |  |
|         |             |         |         |          | 0.00117754  | 1396.88 | 567.65  | -2.4608  |  |
| 5.28353 | 0.000511492 | 799.475 | 1710.68 | 2.13975  | 0.000124674 | 1520.9  | 3726.6  | 2.45026  |  |
|         | 0.00301045  | 1044.2  | 473.3   | -2.20621 | 0.000578083 | 1346.47 | 355.3   | -3.78966 |  |
|         |             |         |         |          | 0.000419375 | 941.033 | #DIV/0! | #DIV/0!  |  |
|         |             |         |         |          | 0.00519626  | 1575.2  | 749.85  | -2.10069 |  |
|         | 7.38999E-06 | 504.35  | #DIV/0! | #DIV/0!  | 9.07705E-06 | 1042.53 | 271.6   | -3.83846 |  |
|         |             |         |         |          | 0.00102292  | 909.125 | 228.6   | -3.97692 |  |
|         | 7.81563E-06 | 595.25  | 294     | -2.02466 |             |         |         |          |  |
|         |             |         |         |          | 5.96209E-07 | 910.15  | #DIV/0! | #DIV/0!  |  |
|         |             |         |         |          | 2.45826E-10 | 5275.33 | 2038.1  | -2.58835 |  |
|         | 2.20231E-05 | 985.475 | 405.567 | -2.42987 | 1.84897E-05 | 1499.53 | 691.7   | -2.16788 |  |
|         |             |         |         |          | 0.00544832  | #DIV/0! | 1951.53 | #DIV/0!  |  |
|         |             |         |         |          | 2.76077E-07 | 7329.18 | 15284.4 | 2.08541  |  |
|         |             |         |         |          | 2.46127E-12 | 3197.33 | 8710.53 | 2.72432  |  |
|         | 5.32256E-07 | 1189.85 | 510.375 | -2.33133 |             |         |         |          |  |
|         |             |         |         |          | 1.9474E-14  | 5603.08 | 15266.9 | 2.72473  |  |
|         |             |         |         |          | 1.52512E-11 | 3202.6  | 10494   | 3.27671  |  |
|         | 0.000114669 | 2044.1  | 10512.7 | 5.14294  | 5.31222E-06 | 3228.5  | 8682.8  | 2.68942  |  |
|         | 0.000282071 | #DIV/0! | 1821.63 | #DIV/0!  |             |         |         |          |  |
|         |             |         |         |          | 3.00129E-06 | 3594.28 | 1084.73 | -3.31354 |  |
|         | 0.00352451  | 1313.97 | 464.9   | -2.82634 |             |         |         |          |  |
|         |             |         |         |          | 3.84893E-05 | 940.375 | 428.95  | -2.19227 |  |
|         |             |         |         |          | 0.00243499  | #DIV/0! | 570.433 | #DIV/0!  |  |
|         | 2.54265E-05 | 1748.68 | 705.5   | -2.47863 |             |         |         |          |  |
|         |             |         |         |          | 0.000111588 | 2216.1  | 4922    | 2.22102  |  |
|         |             |         |         |          | 4.54999E-06 | #DIV/0! | 2459.9  | #DIV/0!  |  |
|         |             |         |         |          | 0.000336787 | 1244.5  | 347.2   | -3.58439 |  |
|         |             |         |         |          | 5.99301E-09 | 3650.13 | 7612.4  | 2.08552  |  |

|  |             |             |         |             |            |             |          |          |         |
|--|-------------|-------------|---------|-------------|------------|-------------|----------|----------|---------|
|  |             |             |         | 0.000001729 | 3573.33    | 8098.38     | 2.26634  |          |         |
|  |             |             |         | 4.77282E-07 | 2567.7     | 6308.65     | 2.45693  |          |         |
|  | 5.94764E-09 | 1772.08     | 569.35  | -3.11245    | 1.2049E-06 | 1988.23     | 774.9    | -2.56578 |         |
|  | 6.80861E-07 | 1024.53     | 396.775 | -2.58213    |            |             |          |          |         |
|  |             |             |         | 0.000250342 | 793.767    | 241.2       | -3.29091 |          |         |
|  |             |             |         | 0.000136843 | 953.275    | 267.233     | -3.5672  |          |         |
|  |             |             |         | 3.86224E-05 | 2001.3     | 555.8       | -3.60076 |          |         |
|  |             |             |         | 0.001222294 | 2001.75    | 752.375     | -2.66057 |          |         |
|  | 0.000117037 | 1112.4      | 2415.15 | 2.17112     |            |             |          |          |         |
|  | 6.46617E-09 | 6425.55     | 23976.2 | 3.73139     |            |             |          |          |         |
|  |             |             |         | 1.35841E-10 | 4718.88    | 21136.7     | 4.47918  |          |         |
|  |             |             |         | 7.32222E-07 | 6496.17    | 3080.8      | -2.1086  |          |         |
|  |             |             |         | 0.00174648  | #DIV/0!    | 2633.83     | #DIV/0!  |          |         |
|  | -2.7671     | 6.64174E-06 | 1174.48 | 478.075     | -2.45668   | 0.000043162 | 1634.8   | 749.6    | -2.1809 |
|  | 3.52747     | 0.000645179 | 1014.4  | 2461.68     | 2.42673    | 9.97954E-05 | 1292.1   | 2886.63  | 2.23406 |
|  | 4.66598     | 1.90896E-11 | 2009.03 | 15760.5     | 7.84483    | 7.35775E-13 | 1904.73  | 12390.7  | 6.50522 |
|  | 2.14554     |             |         |             |            |             |          |          |         |
|  |             |             |         | 3.37681E-06 | 2747.5     | 670         | -4.10075 |          |         |
|  |             |             |         | 0.000163736 | 2136.4     | 393.475     | -5.42957 |          |         |
|  | 0.00822512  | 566.6       | #DIV/0! | #DIV/0!     |            |             |          |          |         |
|  |             |             |         | 4.63499E-05 | 4769.25    | 9734.33     | 2.04106  |          |         |
|  |             |             |         | 1.54782E-06 | 6972.18    | 14260.8     | 2.04539  |          |         |
|  |             |             |         | 3.20066E-05 | 4964.05    | 10870.1     | 2.18977  |          |         |
|  |             |             |         | 7.75512E-07 | #DIV/0!    | 2598.18     | #DIV/0!  |          |         |
|  | 0.00135969  | 468.067     | 1239.1  | 2.64727     |            |             |          |          |         |
|  |             |             |         | 0.0036599   | #DIV/0!    | 742.275     | #DIV/0!  |          |         |
|  |             |             |         | 7.77451E-05 | 2264.93    | 1008.48     | -2.24589 |          |         |
|  |             |             |         | 4.78868E-05 | 1325.15    | 600.175     | -2.20794 |          |         |
|  |             |             |         | 0.000735425 | 780.033    | 384.3       | -2.02975 |          |         |
|  |             |             |         | 1.10537E-05 | 1749.28    | 727.267     | -2.40527 |          |         |
|  |             |             |         | 3.31723E-07 | 9374.83    | 21959.5     | 2.34239  |          |         |
|  |             |             |         | 0.0194405   | #DIV/0!    | 1421.2      | #DIV/0!  |          |         |
|  |             |             |         | 5.11305E-06 | 5684.83    | 11900.7     | 2.09342  |          |         |
|  |             |             |         | 0.000228356 | 3993.18    | 8480.53     | 2.12375  |          |         |
|  |             |             |         | 0.00026169  | 1346.63    | 663         | -2.03112 |          |         |
|  |             |             |         | 0.00570562  | 1168.17    | #DIV/0!     | #DIV/0!  |          |         |
|  |             |             |         | 1.49234E-05 | 1239.48    | 609.1       | -2.03493 |          |         |
|  | 2.24669     | 1.24705E-10 | 5475.55 | 19284.3     | 3.52189    | 7.33234E-06 | 4011.48  | 8162.9   | 2.03489 |
|  |             | 1.32516E-09 | 2012.8  | 5171.78     | 2.56944    | 4.24931E-13 | 1240.85  | 4187.45  | 3.37466 |
|  |             |             |         |             |            | 7.36701E-13 | 4795.23  | 17143.3  | 3.57507 |
|  |             |             |         |             |            | 6.57164E-12 | 18178.4  | 100587   | 5.53335 |
|  |             |             |         |             |            | 1.03862E-10 | #DIV/0!  | 5266.95  | #DIV/0! |
|  |             |             |         |             |            |             |          |          |         |
|  |             |             |         | 0.00111026  | #DIV/0!    | 1303.58     | #DIV/0!  |          |         |
|  |             |             |         | 0.00139345  | 712.233    | #DIV/0!     | #DIV/0!  |          |         |
|  |             |             |         | 2.06584E-07 | 3030.93    | 722.75      | -4.1936  |          |         |
|  |             |             |         | 0.000743693 | 863.833    | 220.3       | -3.92117 |          |         |
|  |             |             |         | 1.4927E-11  | 3238.98    | 10219.6     | 3.15518  |          |         |
|  |             |             |         | 4.94295E-10 | 4655.2     | 10376       | 2.2289   |          |         |
|  |             |             |         | 2.78677E-05 | #DIV/0!    | 3877.9      | #DIV/0!  |          |         |
|  | 0.00585118  | 533         | #DIV/0! | #DIV/0!     |            |             |          |          |         |
|  |             |             |         | 0.00533683  | 1118.73    | #DIV/0!     | #DIV/0!  |          |         |
|  |             |             |         | 7.80229E-05 | 833.975    | #DIV/0!     | #DIV/0!  |          |         |
|  | -2.4651     |             |         |             |            |             |          |          |         |
|  |             |             |         | 3.90637E-18 | 8975.95    | 43523.4     | 4.84889  |          |         |
|  |             |             |         | 7.9848E-20  | 4969.65    | 21433.8     | 4.31293  |          |         |
|  |             |             |         | 4.51783E-14 | 4524.13    | 19597.9     | 4.33186  |          |         |
|  |             |             |         | 3.46459E-20 | 4488.45    | 25980.8     | 5.78836  |          |         |
|  |             |             |         | 1.85209E-10 | 1779.88    | 3674.55     | 2.0645   |          |         |
|  |             |             |         | 5.54487E-07 | 2207.8     | 5158.73     | 2.33659  |          |         |
|  |             |             |         | 3.8601E-16  | 8482.48    | 36618.9     | 4.317    |          |         |
|  | 2.73169     | 2.45831E-11 | 15548.2 | 43154.3     | 2.77551    |             |          |          |         |
|  |             |             |         | 3.27188E-12 | 5991.73    | 16753.2     | 2.79606  |          |         |
|  |             |             |         | 0.010685    | 815.633    | 313         | -2.60586 |          |         |
|  |             |             |         | 2.15443E-07 | 4239.85    | 1485.58     | -2.85401 |          |         |



|         |             |         |         |          |             |         |         |          |
|---------|-------------|---------|---------|----------|-------------|---------|---------|----------|
|         |             |         |         |          | 1.16295E-09 | 5967.15 | 15625.1 | 2.61851  |
|         | 4.84124E-07 | 1723.5  | 4226.18 | 2.45209  |             |         |         |          |
|         | 0.000164244 | 748.525 | 273.5   | -2.73684 |             |         |         |          |
|         |             |         |         |          | 5.33126E-08 | 4445.58 | 12244   | 2.7542   |
|         |             |         |         |          | 1.13653E-13 | 5975.58 | 26323.5 | 4.40517  |
|         | 2.51377E-11 | 9359.33 | 25876.3 | 2.76476  | 4.40319E-19 | 2887.1  | 18275.3 | 6.32998  |
| #DIV/0! | 8.16027E-06 | 1522.85 | #DIV/0! | #DIV/0!  | 7.74624E-07 | 2710.15 | 591.2   | -4.58415 |
| -2.0508 |             |         |         |          |             |         |         |          |
| -7.4729 | 2.1941E-07  | 3502.15 | 424.3   | -8.25395 | 4.96785E-06 | 2475.85 | #DIV/0! | #DIV/0!  |
|         | 0.000529373 | 724.367 | #DIV/0! | #DIV/0!  | 0.00371286  | 1644.4  | 720.3   | -2.28294 |
|         | 0.00124758  | 759.567 | 2608    | 3.43354  |             |         |         |          |
|         |             |         |         |          | 9.94152E-12 | 3137.37 | 21551.4 | 6.86926  |
|         |             |         |         |          | 9.24954E-08 | 6449.9  | 24020.6 | 3.72417  |
|         |             |         |         |          | 7.60519E-05 | 3747.2  | 7945.1  | 2.12028  |
| -2.2749 |             |         |         |          |             |         |         |          |
|         |             |         |         |          | 9.97381E-05 | 5688.13 | 11536.7 | 2.0282   |
|         |             |         |         |          | 8.20869E-08 | 2276.73 | 4699.45 | 2.06413  |
|         |             |         |         |          | 2.03003E-07 | 2600.38 | 7121.38 | 2.7386   |
| 2.23809 | 5.02461E-06 | 1603.5  | 3999.45 | 2.4942   | 4.72275E-07 | 1823.35 | 5371.4  | 2.9459   |
| 2.18534 | 2.74961E-06 | 959.05  | 3444.85 | 3.59194  | 4.15344E-06 | 1079.73 | 3245.4  | 3.00577  |
|         |             |         |         |          | 3.45974E-08 | 2221.5  | 5497.2  | 2.47454  |
|         | 7.12234E-07 | 1843.65 | 3932.53 | 2.13301  |             |         |         |          |
|         |             |         |         |          | 9.94544E-10 | 1577.13 | 447.2   | -3.52667 |
|         | 1.19944E-05 | 3089.8  | 6704.88 | 2.17     |             |         |         |          |
|         | 5.59597E-08 | 4636.48 | 10748.6 | 2.31827  |             |         |         |          |
|         | 0.000497479 | 1550.45 | 4598.25 | 2.96575  | 4.92825E-06 | 1739.43 | 8017.03 | 4.60901  |
|         | 4.82676E-05 | 522.325 | 239.4   | -2.18181 | 5.72654E-08 | 1006.18 | 304.775 | -3.30137 |
|         |             |         |         |          | 1.20352E-07 | 2572.1  | 1169.03 | -2.20021 |
| -4.4302 | 4.79344E-15 | 54320.5 | 4730.43 | -11.4832 | 1.21651E-17 | 90909.3 | 4933.85 | -18.4256 |
|         |             |         |         |          | 0.000300754 | 774.2   | #DIV/0! | #DIV/0!  |
|         | 7.39969E-05 | 1855.88 | 900.35  | -2.06128 | 5.68192E-07 | 2773.4  | 1075.73 | -2.57817 |
|         |             |         |         |          | 5.41239E-05 | 1119    | 402.167 | -2.78243 |
|         | 1.37953E-05 | 4717.83 | 12203   | 2.58658  | 6.93183E-11 | 3322.05 | 15626.5 | 4.70388  |
|         |             |         |         |          | 4.45992E-05 | #DIV/0! | 3921.4  | #DIV/0!  |
|         |             |         |         |          | 0.00345443  | 1599.97 | 738.8   | -2.16563 |
|         |             |         |         |          | 5.81739E-05 | 1332.73 | 462.3   | -2.88283 |
|         |             |         |         |          | 0.000793783 | 1581.18 | 397.375 | -3.97905 |
|         | 0.00978903  | 4595.15 | 1529.55 | -3.00425 |             |         |         |          |
|         |             |         |         |          | 1.23997E-14 | 30705.8 | 147781  | 4.81281  |
|         |             |         |         |          | 2.06591E-06 | 1546.75 | 531.95  | -2.9077  |
|         |             |         |         |          | 2.08006E-05 | 2753.03 | 6610.33 | 2.40111  |
|         |             |         |         |          | 1.79182E-15 | 16000.3 | 117316  | 7.33208  |
| -2.3953 | 9.34775E-10 | 26936.8 | 93009.3 | 3.45288  |             |         |         |          |
| -2.2295 | 0.00372068  | 90637.4 | 35054.3 | -2.58563 |             |         |         |          |
| -2.0862 |             |         |         |          |             |         |         |          |
|         |             |         |         |          | 0.00322124  | 3503.38 | 736.625 | -4.75598 |
|         |             |         |         |          | 2.6327E-11  | 16274.5 | 44705.3 | 2.74696  |
| 8.63653 | 7.54526E-08 | 1286.05 | 12948.1 | 10.0681  | 0.0127278   | 2617.93 | 6150.9  | 2.34953  |
|         | 0.00149802  | #DIV/0! | 2655.35 | #DIV/0!  | 0.0193585   | #DIV/0! | 1444.67 | #DIV/0!  |
|         | 1.69055E-05 | 845.7   | 3998.38 | 4.72789  |             |         |         |          |
|         |             |         |         |          | 1.04655E-08 | 1315.53 | 3994.15 | 3.03616  |
|         |             |         |         |          | 0.00149158  | 1086.98 | 419.75  | -2.58958 |
|         |             |         |         |          | 0.00214688  | 1597.43 | 655.275 | -2.43779 |
|         | 3.18932E-08 | 13380.6 | 32277.8 | 2.41229  | 1.3085E-13  | 7697.65 | 28899.7 | 3.75435  |
|         | 6.86783E-05 | 4435.5  | 9643.65 | 2.1742   | 8.76157E-11 | #DIV/0! | 10382.9 | #DIV/0!  |
|         | 5.47103E-14 | 5053.65 | 14030.2 | 2.77625  | 4.00977E-20 | 2674.98 | 13184.3 | 4.92877  |
|         | 0.000120041 | 681.667 | #DIV/0! | #DIV/0!  | 0.000402743 | 1336.27 | 424.1   | -3.15083 |
| 2.01196 | 4.07909E-13 | 3235.58 | 12460.3 | 3.85104  | 1.42473E-14 | 2842.9  | 11950.1 | 4.20348  |
|         | 4.85466E-10 | 3223.48 | 12220.4 | 3.79107  | 9.14214E-13 | 2809.55 | 14439.8 | 5.13954  |
| #DIV/0! |             |         |         |          |             |         |         |          |
| 3.02131 | 5.20628E-07 | 1030.6  | 2408.18 | 2.33667  | 2.96937E-13 | #DIV/0! | 3789.2  | #DIV/0!  |
| 2.91938 | 7.18364E-05 | #DIV/0! | 2792.35 | #DIV/0!  | 2.61027E-08 | #DIV/0! | 3832.2  | #DIV/0!  |

|         |             |         |         |          |             |         |         |          |
|---------|-------------|---------|---------|----------|-------------|---------|---------|----------|
|         | 0.0021963   | #DIV/0! | 2506.53 | #DIV/0!  | 2.84466E-06 | #DIV/0! | 3322.13 | #DIV/0!  |
|         |             |         |         |          | 0.00205727  | #DIV/0! | 1579.18 | #DIV/0!  |
|         | 0.00197604  | 1308.35 | 556.425 | -2.35135 | 0.00193471  | 2114.78 | 835.95  | -2.52979 |
|         | 4.27093E-07 | 1025.73 | #DIV/0! | #DIV/0!  | 2.97385E-05 | 1933.57 | 897.7   | -2.15391 |
|         |             |         |         |          | 8.98E-13    | 2554.5  | 10282.4 | 4.02522  |
|         |             |         |         |          | 2.7113E-06  | 2481.35 | 5293.75 | 2.13342  |
|         |             |         |         |          | 6.8931E-06  | 3510.03 | 1113.98 | -3.1509  |
|         |             |         |         |          | 6.1686E-07  | 3823.78 | 8834.38 | 2.31038  |
|         |             |         |         |          | 1.12335E-09 | 5327.83 | 14955.2 | 2.807    |
|         | 1.20621E-06 | 5358.85 | 11866.4 | 2.21436  | 4.36769E-09 | 3422.05 | 9724.78 | 2.8418   |
|         |             |         |         |          | 0.000631074 | 1625.53 | 568.05  | -2.86159 |
|         |             |         |         |          | 6.46708E-20 | 10031.1 | 31234.2 | 3.11374  |
| -2.4186 |             |         |         |          |             |         |         |          |
|         | 0.00362872  | 1320.48 | 434.425 | -3.03959 | 0.00299102  | 2193.08 | 785.75  | -2.79106 |
|         | 1.46616E-05 | 33712.4 | 16585.2 | -2.03268 | 3.10617E-05 | 58585.8 | 28795.5 | -2.03455 |
|         | 0.000222504 | 881.35  | 343.8   | -2.56355 |             |         |         |          |
|         |             |         |         |          | 1.39287E-07 | 37158.1 | 79905.5 | 2.15042  |
|         |             |         |         |          | 1.03234E-08 | 23402.2 | 51476.9 | 2.19966  |
|         | 0.00158975  | 583.25  | 285.925 | -2.03987 |             |         |         |          |
|         |             |         |         |          | 4.49782E-14 | 18407.7 | 71642.2 | 3.89197  |
| -2.1806 | 2.10592E-05 | 2542.73 | 1131.68 | -2.24687 |             |         |         |          |
|         |             |         |         |          | 0.00289219  | 1299.8  | 553.333 | -2.34904 |
|         |             |         |         |          | 0.00154854  | 2589.33 | 1179.95 | -2.19444 |
|         | 0.000209565 | 836     | #DIV/0! | #DIV/0!  | 3.81683E-08 | 1394.7  | #DIV/0! | #DIV/0!  |
|         |             |         |         |          | 0.0100285   | 2410.13 | #DIV/0! | #DIV/0!  |
| -2.2315 |             |         |         |          |             |         |         |          |
|         |             |         |         |          | 0.00194535  | #DIV/0! | 776.567 | #DIV/0!  |
|         |             |         |         |          | 1.34988E-06 | #DIV/0! | 2506.43 | #DIV/0!  |
|         | 1.59558E-06 | 5881.08 | 12265.1 | 2.08551  | 2.34164E-07 | 4156.93 | 9145.48 | 2.20006  |
|         |             |         |         |          | 5.50433E-13 | 1148.7  | 3869.43 | 3.36853  |
|         |             |         |         |          | 5.70577E-06 | #DIV/0! | 803.875 | #DIV/0!  |
|         |             |         |         |          | 3.08529E-05 | #DIV/0! | 597.65  | #DIV/0!  |
|         |             |         |         |          | 1.82935E-07 | 1864.03 | #DIV/0! | #DIV/0!  |
|         | 2.77257E-06 | 4200.48 | 1935.93 | -2.16975 | 5.19363E-11 | 7242.6  | 2085.78 | -3.47238 |
|         | 1.323E-10   | 5229.68 | 12251.4 | 2.34266  | 5.73415E-13 | 3419.85 | 10205.1 | 2.98406  |
|         | 3.28093E-10 | 6339.2  | 16242.7 | 2.56226  | 1.33313E-13 | 3601.3  | 12259.1 | 3.40408  |
|         | 4.68614E-07 | 4557.6  | 9946.88 | 2.18248  | 1.27832E-09 | #DIV/0! | 8144.05 | #DIV/0!  |
|         |             |         |         |          | 9.74108E-08 | 2633.25 | 1007.25 | -2.6143  |
|         |             |         |         |          | 0.00171528  | 986.6   | 153.4   | -6.43155 |
|         |             |         |         |          | 0.00837281  | 991.733 | 261.2   | -3.79684 |
|         | 0.0153552   | 844.5   | #DIV/0! | #DIV/0!  |             |         |         |          |
|         | 5.39608E-05 | 996.875 | 332.7   | -2.99632 | 2.01813E-05 | 1695.48 | 615.933 | -2.75269 |
| -3.0589 | 9.81493E-07 | 1596.18 | 402.35  | -3.96713 | 0.000022835 | 2674.83 | 810.85  | -3.29879 |
|         |             |         |         |          | 0.00281759  | #DIV/0! | 2287.2  | #DIV/0!  |
|         | 0.000906696 | 1228.27 | 314.433 | -3.90629 | 5.83313E-06 | 2464.25 | 497.15  | -4.95675 |
|         | 0.00964908  | 600.867 | 289.033 | -2.07888 |             |         |         |          |
|         | 7.22228E-06 | 996.575 | 359.233 | -2.77417 | 1.14226E-07 | 1802.98 | 436.533 | -4.13021 |
|         | 0.000356635 | 1438.63 | 564.8   | -2.54714 | 9.71054E-06 | 2852.15 | 812.175 | -3.51174 |
|         |             |         |         |          | 6.51357E-05 | 2008.2  | 932.3   | -2.15403 |
|         |             |         |         |          | 0.0230454   | 942.033 | 450.567 | -2.09077 |
| 13.3847 |             |         |         |          | 0.00765664  | #DIV/0! | 1138.88 | #DIV/0!  |
|         | 0.000022648 | 1615.5  | 587.55  | -2.74955 |             |         |         |          |
|         | 0.00192785  | 855.167 | #DIV/0! | #DIV/0!  |             |         |         |          |
|         |             |         |         |          | 0.000398659 | 2334.23 | 375.275 | -6.22004 |
|         |             |         |         |          | 0.00177218  | 1063.75 | 292.3   | -3.63924 |
|         |             |         |         |          | 0.0106998   | 1878.03 | #DIV/0! | #DIV/0!  |
|         |             |         |         |          | 1.58928E-10 | 3944.1  | 12844.7 | 3.25668  |
|         |             |         |         |          | 2.08579E-13 | 2914.77 | 14118.8 | 4.8439   |
|         | 3.9013E-10  | 5922.5  | 15968.5 | 2.69624  | 2.60003E-17 | 2352.75 | 13752   | 5.84507  |
|         |             |         |         |          | 0.00292547  | 1340.13 | 286     | -4.68575 |
|         | 2.32466E-05 | 958.85  | 429.133 | -2.23439 |             |         |         |          |
|         | 0.00062938  | 559.2   | 1551.18 | 2.77392  |             |         |         |          |
|         | 0.00113242  | 625.833 | 267.25  | -2.34175 | 0.000813777 | 770.067 | 279     | -2.7601  |

|         |             |         |         |          |             |         |         |          |
|---------|-------------|---------|---------|----------|-------------|---------|---------|----------|
|         | 0.000004106 | 1582    | 588.025 | -2.69036 | 1.87293E-09 | 3431.73 | 803.725 | -4.26978 |
|         | 0.000385263 | #DIV/0! | 2757.17 | #DIV/0!  | 1.04648E-06 | #DIV/0! | 3538.08 | #DIV/0!  |
|         | 2.11905E-06 | 2018.93 | 662.967 | -3.04529 | 0.000510118 | #DIV/0! | 2216.85 | #DIV/0!  |
|         |             |         |         |          | 2.45105E-06 | 2480.87 | 776.25  | -3.19596 |
|         |             |         |         |          | 0.00106384  | 1185.68 | #DIV/0! | #DIV/0!  |
|         |             |         |         |          | 4.96153E-11 | 4481.68 | 10641   | 2.37433  |
|         |             |         |         |          | 7.62002E-10 | 5355.75 | 11533.1 | 2.15341  |
|         |             |         |         |          | 8.81772E-12 | 8953.63 | 20501.9 | 2.28979  |
|         |             |         |         |          | 4.23568E-17 | 3395.23 | 14407.1 | 4.24334  |
|         | 0.00115383  | 3956.35 | 9150.7  | 2.31291  | 6.97588E-12 | #DIV/0! | 12332.4 | #DIV/0!  |
|         |             |         |         |          | 3.13627E-09 | 3275.45 | 7630.93 | 2.32973  |
|         |             |         |         |          | 0.00104741  | 1548.77 | 259     | -5.97979 |
|         |             |         |         |          | 0.0101449   | #DIV/0! | 5216.95 | #DIV/0!  |
|         |             |         |         |          | 1.50616E-16 | 3539.58 | 11817.9 | 3.33878  |
|         |             |         |         |          | 0.000151612 | #DIV/0! | 1246.43 | #DIV/0!  |
| #DIV/0! | 0.00240514  | #DIV/0! | 1744.93 | #DIV/0!  | 0.00165492  | #DIV/0! | 2394.07 | #DIV/0!  |
| #DIV/0! | 1.16961E-05 | #DIV/0! | 1913.45 | #DIV/0!  | 0.0014989   | #DIV/0! | 2503.35 | #DIV/0!  |
|         | 1.97433E-07 | 45995   | 21910.2 | -2.09925 | 1.02885E-09 | 29703.4 | 11904.2 | -2.49521 |
|         | 0.000257746 | 4975.33 | 10409.6 | 2.09225  | 2.29917E-10 | 1686.13 | 7723.93 | 4.58087  |
|         | 1.614E-07   | 10794.4 | 28393.2 | 2.63036  | 1.07148E-14 | 3967.5  | 23288.3 | 5.86977  |
|         | 0.00003615  | 1546.7  | 511.35  | -3.02474 | 8.95012E-07 | 3213.75 | 861.75  | -3.72933 |
|         | 2.81354E-05 | 1194.83 | 542.325 | -2.20315 |             |         |         |          |
|         |             |         |         |          | 9.03325E-11 | 16833.4 | 41811   | 2.48381  |
|         |             |         |         |          | 7.93289E-12 | 10635.8 | 31305.5 | 2.9434   |
|         |             |         |         |          | 4.36217E-07 | #DIV/0! | 1815.17 | #DIV/0!  |
|         |             |         |         |          | 9.19715E-13 | 6336.68 | 19372.6 | 3.05722  |
|         | 0.000296038 | 3014.43 | 1165.2  | -2.58705 | 1.40538E-06 | 5290.2  | 1302.05 | -4.06298 |
|         | 3.65778E-07 | 4653.58 | 10031.2 | 2.1556   | 6.42768E-07 | 5072.25 | 10460.5 | 2.06229  |
|         |             |         |         |          | 7.12171E-11 | 6805.6  | 13629.8 | 2.00273  |
|         |             |         |         |          | 0.00264225  | 1777.48 | 776.825 | -2.28813 |
|         |             |         |         |          | 2.93572E-13 | 5036.9  | 18701.1 | 3.71281  |
|         |             |         |         |          | 4.14184E-11 | 3347.8  | 12699.6 | 3.79341  |
|         | 4.91309E-05 | 8386.83 | 17201.3 | 2.05099  | 7.12356E-14 | 2790.53 | 15100.3 | 5.41127  |
|         | 0.000141273 | 4581.8  | 13376.5 | 2.91949  |             |         |         |          |
|         |             |         |         |          | 2.81851E-06 | 1309.83 | 497     | -2.63546 |
|         |             |         |         |          | 1.97475E-06 | 1430.18 | 424.6   | -3.36829 |
|         |             |         |         |          | 4.80438E-06 | 859.2   | #DIV/0! | #DIV/0!  |
|         |             |         |         |          | 4.98263E-07 | 1751.9  | 5240.73 | 2.99145  |
|         |             |         |         |          | 0.000491933 | 1140.58 | 517.9   | -2.20231 |
|         |             |         |         |          | 1.46453E-08 | 974.825 | 383.6   | -2.54125 |
|         |             |         |         |          | 0.000281982 | 896.7   | #DIV/0! | #DIV/0!  |
|         |             |         |         |          | 0.000897184 | 1514.17 | 386.7   | -3.91561 |
|         | 0.0000263   | 8847.75 | 3130    | -2.82676 | 0.000612947 | 14323.9 | 7157.38 | -2.00127 |
|         | 0.00418934  | 914.833 | #DIV/0! | #DIV/0!  | 8.23797E-07 | 1261.8  | #DIV/0! | #DIV/0!  |
|         |             |         |         |          | 1.00161E-10 | #DIV/0! | 2809.53 | #DIV/0!  |
|         |             |         |         |          | 2.60235E-09 | #DIV/0! | 1890.67 | #DIV/0!  |
|         |             |         |         |          | 0.000218065 | #DIV/0! | 3606.7  | #DIV/0!  |
|         |             |         |         |          | 0.000634037 | #DIV/0! | 3277.2  | #DIV/0!  |
|         |             |         |         |          | 8.90016E-05 | #DIV/0! | 2474.75 | #DIV/0!  |
|         |             |         |         |          |             |         |         |          |
|         |             |         |         |          | 0.000781649 | 1179.87 | 475.1   | -2.48341 |
|         |             |         |         |          | 2.5232E-06  | #DIV/0! | 1739.78 | #DIV/0!  |
|         | 8.14787E-07 | 3038.88 | 1167.03 | -2.60395 |             |         |         |          |
|         |             |         |         |          | 0.00118973  | 696.167 | #DIV/0! | #DIV/0!  |
|         | 3.23137E-05 | 1588.58 | 769.475 | -2.06449 |             |         |         |          |
|         |             |         |         |          | 7.61574E-07 | 2101.13 | 4279.95 | 2.03698  |
|         |             |         |         |          | 2.58564E-07 | 2298.35 | 5464.03 | 2.37737  |
|         |             |         |         |          | 1.50731E-09 | 3363.5  | 9014    | 2.67995  |
|         |             |         |         |          | 2.08703E-11 | 3674.93 | 11498.4 | 3.12887  |
| #DIV/0! | 1.15629E-09 | #DIV/0! | 3465.9  | #DIV/0!  |             |         |         |          |
| -4.1132 | 1.27082E-06 | 9055.5  | 1446.08 | -6.26212 |             |         |         |          |

-4.6205

|         |             |         |         |          |             |         |         |          |
|---------|-------------|---------|---------|----------|-------------|---------|---------|----------|
|         |             |         |         |          | 2.36698E-08 | 7521.33 | 16120.9 | 2.14336  |
|         |             |         |         |          | 0.0136029   | #DIV/0! | 904.867 | #DIV/0!  |
|         | 5.90754E-05 | 2376.3  | 937.95  | -2.5335  | 0.000010799 | 2189.35 | 832.475 | -2.62993 |
|         |             |         |         |          | 0.000559311 | 6989.83 | 1547.6  | -4.51656 |
|         |             |         |         |          | 2.76334E-06 | 2781.25 | 1304.98 | -2.13127 |
|         |             |         |         |          | 2.23659E-11 | 9043.65 | 27312   | 3.02001  |
|         |             |         |         |          | 0.00288145  | 1836.3  | 4255.6  | 2.31749  |
|         |             |         |         |          | 0.00405898  | #DIV/0! | 1147.25 | #DIV/0!  |
|         | 7.84806E-05 | 2411.63 | 10291.7 | 4.26755  |             |         |         |          |
|         |             |         |         |          | 0.000827998 | 1313.38 | 339.975 | -3.86315 |
| -2.1455 | 4.62936E-11 | 1876.08 | 325.6   | -5.7619  | 2.16397E-07 | 1969.53 | 718.2   | -2.74231 |
| #DIV/0! | 5.51503E-05 | 1427.53 | 368.2   | -3.87706 | 0.00124681  | 1809.88 | #DIV/0! | #DIV/0!  |
|         |             |         |         |          | 1.83131E-07 | #DIV/0! | 5189.1  | #DIV/0!  |
|         |             |         |         |          | 0.00924406  | 1190.2  | 379.6   | -3.13541 |
|         | 3.76333E-06 | 3234.3  | #DIV/0! | #DIV/0!  | 8.16005E-09 | 7355.63 | #DIV/0! | #DIV/0!  |
|         |             |         |         |          | 0.00353532  | 3125.8  | 747.7   | -4.18055 |
|         |             |         |         |          | 9.85359E-09 | 2584.43 | 5511.68 | 2.13265  |
|         |             |         |         |          | 1.95733E-11 | 2853.08 | 6982.78 | 2.44746  |
|         |             |         |         |          | 1.44496E-09 | #DIV/0! | 4811.48 | #DIV/0!  |
|         |             |         |         |          | 1.67214E-21 | 3409.23 | 15130.2 | 4.438    |
|         |             |         |         |          | 0.000169719 | #DIV/0! | 2071.05 | #DIV/0!  |
|         | 4.52529E-05 | 2176.08 | 1077.6  | -2.01937 |             |         |         |          |
|         | 0.000831724 | 596.825 | 247.75  | -2.40898 | 1.26937E-05 | 1406.53 | 444.65  | -3.16322 |
|         |             |         |         |          | 0.000892259 | #DIV/0! | 1298.85 | #DIV/0!  |
|         |             |         |         |          | 2.16234E-07 | 3341.9  | 1549.8  | -2.15634 |
|         | 2.95181E-06 | 622.05  | 218.7   | -2.84431 |             |         |         |          |
| 2.59415 | 7.57338E-10 | 2882.23 | 11112.9 | 3.85565  |             |         |         |          |
|         |             |         |         |          | 2.09454E-05 | 3231    | 1463.05 | -2.2084  |
|         | 2.69782E-09 | 4059.85 | 15153.2 | 3.73244  | 6.69659E-12 | 2432.93 | 12645.6 | 5.19769  |
|         | 1.54138E-07 | 1959.93 | 928.075 | -2.11182 |             |         |         |          |
|         |             |         |         |          | 3.90125E-06 | #DIV/0! | 3468.28 | #DIV/0!  |
|         |             |         |         |          | 5.26524E-15 | 7596.95 | 26735.9 | 3.51929  |
|         |             |         |         |          | 2.18861E-16 | 6915.58 | 26969.4 | 3.8998   |
|         | 0.000416986 | 2936.53 | 882.875 | -3.3261  |             |         |         |          |
|         |             |         |         |          | 4.62253E-06 | 25885.8 | 53210.1 | 2.05557  |
|         |             |         |         |          | 1.5476E-07  | 15989.5 | 41470   | 2.59358  |
|         | 1.0223E-06  | 3380.93 | 1600.58 | -2.11232 |             |         |         |          |
| -2.0384 |             |         |         |          | 0.0143569   | 991.133 | #DIV/0! | #DIV/0!  |
|         |             |         |         |          | 3.78796E-05 | 1436.55 | 538.35  | -2.66843 |
|         | 0.00762615  | 849.1   | 308.633 | -2.75116 | 0.00658921  | 1567.53 | 441.75  | -3.54844 |
|         |             |         |         |          | 4.52204E-05 | 1059.53 | 2268.6  | 2.14113  |
|         |             |         |         |          | 1.62347E-11 | 6696.33 | 14488.4 | 2.16364  |
|         | 3.59892E-05 | 1248.73 | 2606.4  | 2.08725  | 1.26727E-06 | 1165.08 | 2685.18 | 2.30472  |
|         |             |         |         |          | 3.73249E-06 | 1733.2  | 4259.38 | 2.45752  |
|         |             |         |         |          | 1.32523E-10 | 1227.5  | 3252.6  | 2.64978  |
|         | 9.44862E-10 | 10519.4 | 22526.8 | 2.14145  | 1.39028E-12 | 8591.3  | 23712.6 | 2.76007  |
|         |             |         |         |          | 1.40496E-16 | 6483.43 | 18925.9 | 2.91912  |
|         |             |         |         |          | 3.88958E-09 | 2297.8  | 6770.65 | 2.94658  |
|         |             |         |         |          | 1.34409E-10 | 3041.73 | 9132.4  | 3.00238  |
|         |             |         |         |          | 4.93833E-10 | 2981.15 | 7668.18 | 2.57222  |
|         | 3.99132E-08 | 1879.35 | 521.875 | -3.60115 | 1.36656E-10 | 4284.55 | 857.45  | -4.99685 |
| #DIV/0! |             |         |         |          |             |         |         |          |
|         |             |         |         |          | 2.22389E-14 | 5746.85 | 17440.6 | 3.03481  |
|         |             |         |         |          | 0.00127819  | 585.6   | 240.9   | -2.43088 |
|         |             |         |         |          | 0.00775596  | 1717.55 | 456.233 | -3.76463 |
|         |             |         |         |          | 0.00458084  | 554.833 | 1479.6  | 2.66675  |
|         |             |         |         |          | 0.0105842   | 4867.25 | 2356.6  | -2.06537 |
|         |             |         |         |          | 2.78265E-09 | 9953.88 | 26610.9 | 2.67342  |
|         | 2.62076E-05 | 14073.6 | 49553.9 | 3.52104  | 9.89073E-08 | 11392.8 | 66969.3 | 5.8782   |
|         |             |         |         |          | 0.000064858 | #DIV/0! | 1238.6  | #DIV/0!  |

|         |             |         |         |            |             |         |          |
|---------|-------------|---------|---------|------------|-------------|---------|----------|
|         |             |         |         | 0.00378302 | 699.15      | 176.15  | -3.96906 |
|         | 0.00429223  | 887.95  | 413.75  | -2.1461    | 0.000969371 | 949     | -2.00719 |
|         |             |         |         |            | 3.33662E-09 | 4362.35 | 859.575  |
|         | 2.8985E-06  | 1503.85 | 566.225 | -2.65592   | 5.09491E-10 | 3555.93 | 801.575  |
|         | 1.90984E-07 | 1497.6  | 633.267 | -2.36488   |             |         |          |
|         |             |         |         |            | 2.86132E-06 | 876.45  | 416.6    |
|         | 0.000479665 | 1373.03 | 586.2   | -2.34225   | 0.000141898 | 1747.98 | 850.2    |
|         |             |         |         |            | 8.87646E-05 | 1558.33 | 429.7    |
|         |             |         |         |            | 3.326E-09   | 5264.73 | 10719.5  |
|         |             |         |         |            | 6.62684E-12 | 8350.78 | 22874.5  |
|         |             |         |         |            | 0.0123955   | 1217.97 | 263.1    |
|         |             |         |         |            | 1.07316E-06 | #DIV/0! | 2791.28  |
|         |             |         |         |            | 2.46186E-05 | #DIV/0! | 3747.43  |
|         | 8.91578E-06 | 2149.95 | 558.425 | -3.85002   |             |         |          |
|         | 1.44164E-07 | 5336.1  | 1154.5  | -4.622     | 0.000462404 | 5474.35 | 2341.55  |
|         | 5.23832E-09 | 6349.25 | 1431.6  | -4.43507   |             |         |          |
|         |             |         |         |            | 0.000176767 | 933.667 | #DIV/0!  |
|         |             |         |         |            | 1.43913E-05 | 1579.3  | 3173.1   |
|         |             |         |         |            | 4.06331E-06 | 2536.9  | 5466.95  |
|         |             |         |         |            | 3.92042E-07 | 1491.6  | 4515.48  |
|         | 0.000317615 | 597.625 | 1454.33 | 2.43351    |             |         |          |
|         |             |         |         |            | 0.00870825  | 1929.88 | 746.65   |
|         |             |         |         |            | 1.44693E-09 | 2376.15 | 6730.83  |
|         |             |         |         |            | 4.92007E-07 | 3770.68 | 7785.75  |
|         |             |         |         |            | 0.000790563 | 1129    | 272.7    |
|         |             |         |         |            | 0.000241335 | 1219.13 | 469.025  |
|         |             |         |         |            | 1.4752E-07  | 3229.07 | 10939.1  |
|         | 0.000293647 | 1509.53 | 623.2   | -2.42222   | 3.23794E-07 | 1410.08 | 354.425  |
|         | 0.000144911 | 10749   | 4125.58 | -2.60545   |             |         |          |
|         | 0.00450232  | 5639.73 | 2754.75 | -2.04727   |             |         |          |
| -2.1064 |             |         |         |            |             |         |          |
|         | 2.90981E-06 | 6940.15 | 20225.2 | 2.91423    | 2.24323E-10 | 4580.15 | 20984.6  |
|         | 0.004071    | 455.5   | 1428.78 | 3.13672    | 3.84901E-08 | #DIV/0! | 997.5    |
|         |             |         |         |            | 0.00468276  | 2449.08 | 968.175  |
|         | 9.35286E-05 | 884.925 | 350.65  | -2.52367   | 0.000840463 | 1393.78 | 554.65   |
|         | 2.40662E-10 | 58111.1 | 13557.7 | -4.2862    |             |         |          |
| -2.2943 | 1.52861E-05 | 22740.3 | 7790.5  | -2.91898   |             |         |          |
|         | 1.04205E-08 | 74831.4 | 27998.8 | -2.67266   |             |         |          |
|         |             |         |         |            | 0.00511199  | 928.433 | 279.6    |
| -2.1905 | 2.36089E-08 | 3874.45 | 1432.88 | -2.70397   | 2.39319E-06 | 4208.6  | 1908.13  |
|         |             |         |         |            |             |         |          |
|         |             |         |         |            | 7.21651E-07 | 3017.03 | 1398.95  |
|         |             |         |         |            | 2.74586E-06 | 930.45  | 2313.7   |
|         |             |         |         |            | 2.39352E-07 | 2128.03 | 4424.55  |
|         |             |         |         |            | 0.000030731 | 2389.53 | 766.125  |
|         | 9.03736E-08 | 2905.28 | 1012.8  | -2.86856   | 2.32637E-07 | 5163    | 1866.08  |
|         | 0.000417368 | 2306.65 | 1069.38 | -2.15701   | 2.22903E-12 | 8238.18 | 1230.33  |
|         |             |         |         |            | 0.0154977   | 1448.93 | 685.2    |
|         | 0.00845168  | 1068.4  | 390.4   | -2.73668   | 0.00304321  | 3143.4  | 952.5    |
|         | 1.62949E-06 | 5810.15 | 16478.4 | 2.83614    | 1.06052E-08 | 2717.05 | 10324.7  |
|         |             |         |         |            | 3.8411E-08  | 3149.88 | 10155.3  |
| 6.14158 | 0.000025842 | 1220.83 | 18086.1 | 14.8146    | 2.81126E-06 | 1465.4  | 25680.6  |
|         | 0.0135123   | #DIV/0! | 575.125 | #DIV/0!    |             |         |          |
| -3.2677 | 9.08361E-05 | 1709.73 | 640.1   | -2.67103   |             |         |          |
|         | 0.000333303 | 650.075 | #DIV/0! | #DIV/0!    | 0.00678341  | 1133.9  | 534      |
|         |             |         |         |            | 1.31416E-06 | 80561.4 | 191909   |
|         |             |         |         |            | 5.10287E-08 | 64055.3 | 187969   |
|         |             |         |         |            | 0.00291079  | 873.1   | 418.875  |
|         |             |         |         |            | 3.67058E-07 | 1659.95 | 491.525  |
|         | 5.75689E-05 | 1041.95 | 502.8   | -2.0723    |             |         |          |
|         | 6.7037E-06  | 623.867 | 251.95  | -2.47615   |             |         |          |

|         |             |         |         |          |             |         |         |          |  |
|---------|-------------|---------|---------|----------|-------------|---------|---------|----------|--|
|         |             |         |         |          | 1.64186E-05 | 1080.07 | 467.025 | -2.31265 |  |
|         | 0.000306873 | 1148.98 | 472.275 | -2.43285 |             |         |         |          |  |
|         |             |         |         |          | 0.00668709  | #DIV/0! | 2652    | #DIV/0!  |  |
|         |             |         |         |          | 2.90497E-09 | 2103.85 | 5207.75 | 2.47534  |  |
|         |             |         |         |          | 5.1386E-10  | 2242.25 | 5246.75 | 2.33995  |  |
|         |             |         |         |          | 4.30973E-13 | 1753.95 | 5535    | 3.15573  |  |
|         | 1.34263E-05 | 884.333 | 355     | -2.49108 |             |         |         |          |  |
|         | 1.21306E-06 | 671.7   | #DIV/0! | #DIV/0!  |             |         |         |          |  |
|         |             |         |         |          | 0.00332336  | 2453.23 | 565.233 | -4.3402  |  |
|         |             |         |         |          | 0.00256871  | 1287.95 | 448.425 | -2.87216 |  |
|         |             |         |         |          | 1.36781E-05 | 2549.8  | 1050.23 | -2.42784 |  |
|         |             |         |         |          | 9.20217E-08 | 1449.85 | 657.9   | -2.20375 |  |
| -2.1394 |             |         |         |          |             |         |         |          |  |
| -2.1271 | 2.42626E-07 | 848.275 | 381     | -2.22644 |             |         |         |          |  |
| #DIV/0! | 8.82409E-06 | 1219.88 | #DIV/0! | #DIV/0!  |             |         |         |          |  |
|         | 0.00172143  | 593.1   | #DIV/0! | #DIV/0!  |             |         |         |          |  |
| #DIV/0! |             |         |         |          |             |         |         |          |  |
|         | 0.000134709 | 782.65  | 343.55  | -2.27813 | 1.3251E-06  | 1149.3  | 334.5   | -3.43587 |  |
|         |             |         |         |          | 0.00206258  | #DIV/0! | 1150.9  | #DIV/0!  |  |
|         |             |         |         |          | 6.7335E-11  | #DIV/0! | 6004.18 | #DIV/0!  |  |
|         |             |         |         |          | 2.20068E-12 | 8897.55 | 19419   | 2.18251  |  |
|         |             |         |         |          |             |         |         |          |  |
| -4.636  | 0.000013744 | 1199.77 | 317.5   | -3.77879 |             |         |         |          |  |
| #DIV/0! |             |         |         |          |             |         |         |          |  |
| 2.31314 | 1.15245E-08 | #DIV/0! | 5436.2  | #DIV/0!  | 7.20659E-11 | #DIV/0! | 7572.73 | #DIV/0!  |  |
|         | 1.89288E-10 | 11875   | 42819.8 | 3.60588  | 2.00015E-06 | 11289   | 24859.5 | 2.20209  |  |
|         |             |         |         |          | 4.68472E-11 | 2535.58 | 1022.1  | -2.48075 |  |
|         |             |         |         |          | 0.0046575   | #DIV/0! | 1431.7  | #DIV/0!  |  |
|         |             |         |         |          | 1.02921E-05 | 3021.53 | 502.433 | -6.01378 |  |
|         |             |         |         |          | 0.000542579 | 768.533 | #DIV/0! | #DIV/0!  |  |
|         |             |         |         |          | 0.000164964 | 1562.38 | 527.9   | -2.9596  |  |
|         |             |         |         |          | 0.00194147  | 948.475 | 425.4   | -2.22961 |  |
|         |             |         |         |          |             |         |         |          |  |
|         | 0.0108209   | 814.4   | 273.075 | -2.98233 | 0.00764164  | 1532.67 | 456.6   | -3.35669 |  |
|         |             |         |         |          | 9.76484E-06 | 5801.88 | 1707.73 | -3.39743 |  |
|         | 0.00016831  | 2958.95 | 1015.3  | -2.91436 | 0.00452599  | 2751.4  | #DIV/0! | #DIV/0!  |  |
|         |             |         |         |          | 4.55183E-05 | #DIV/0! | 3043.73 | #DIV/0!  |  |
|         |             |         |         |          | 0.0149398   | 1432.17 | 526.6   | -2.71965 |  |
|         | 0.00140909  | 788.9   | 365.825 | -2.1565  | 0.000206962 | 1253.83 | 486.725 | -2.57604 |  |
|         |             |         |         |          | 0.00719919  | 1355.33 | #DIV/0! | #DIV/0!  |  |
|         |             |         |         |          |             |         |         |          |  |
|         | 0.00779275  | 1024.2  | 389.133 | -2.632   | 0.00549235  | 3128.15 | 1521.23 | -2.05634 |  |
|         |             |         |         |          | 2.4752E-06  | 1315.33 | 285.7   | -4.6039  |  |
|         |             |         |         |          | 0.00790249  | 638.733 | #DIV/0! | #DIV/0!  |  |
|         |             |         |         |          | 0.00153764  | 1386.27 | #DIV/0! | #DIV/0!  |  |
|         |             |         |         |          | 0.000179528 | 1512.03 | 454.95  | -3.32352 |  |
|         |             |         |         |          | 8.66956E-06 | 2331.18 | 964.75  | -2.41635 |  |
|         |             |         |         |          | 0.000088168 | 5620.33 | 2716.75 | -2.06877 |  |
|         |             |         |         |          |             |         |         |          |  |
|         |             |         |         |          | 0.000401984 | 2150.63 | 761.3   | -2.82495 |  |
|         |             |         |         |          | 0.000164944 | 2283.68 | 562.575 | -4.05933 |  |
|         |             |         |         |          | 7.58305E-06 | 3270.33 | 754.65  | -4.33357 |  |
|         |             |         |         |          | 0.000165801 | 1932.6  | 733.8   | -2.63369 |  |
|         |             |         |         |          | 5.43619E-05 | 1831.05 | 843.95  | -2.16962 |  |
|         |             |         |         |          | 1.66314E-11 | 5004.85 | 23861.2 | 4.76761  |  |
|         |             |         |         |          | 9.91437E-05 | 1405.15 | 545.95  | -2.57377 |  |
|         |             |         |         |          | 3.32681E-15 | 3064.8  | 16259.9 | 5.30538  |  |
|         |             |         |         |          | 2.01988E-07 | 2162.38 | 4337.6  | 2.00594  |  |
|         |             |         |         |          |             |         |         |          |  |
|         | 1.97965E-08 | 2605.9  | 771.1   | -3.37946 |             |         |         |          |  |
| -2.0441 | 2.48974E-05 | 5490.33 | 2380.7  | -2.30618 | 4.62346E-07 | 859     | 1863.1  | 2.16892  |  |
|         |             |         |         |          | 0.0063033   | 2033.3  | #DIV/0! | #DIV/0!  |  |
|         |             |         |         |          | 8.97042E-21 | 2384.83 | 20394.2 | 8.55167  |  |
| 4.2764  | 7.42341E-21 | 2189.05 | 21969.9 | 10.0363  | 1.67081E-19 | 6501.48 | 70632.2 | 10.864   |  |
| 5.36536 | 3.70549E-17 | 8015.4  | 63202.7 | 7.88516  | 0.00031276  | #DIV/0! | 1395.4  | #DIV/0!  |  |
|         |             |         |         |          | 0.0169528   | 7762.5  | 1674.03 | -4.637   |  |



|         |             |         |         |          |             |         |         |          |  |
|---------|-------------|---------|---------|----------|-------------|---------|---------|----------|--|
| -3.6977 | 1.19177E-07 | 18438.4 | 4696    | -3.92641 |             |         |         |          |  |
|         | 0.00143613  | 3813.6  | 1505.35 | -2.53336 | 2.198E-08   | 264643  | 72426.8 | -3.65394 |  |
|         |             |         |         |          | 1.86665E-08 | 12933   | 1884.75 | -6.8619  |  |
|         |             |         |         |          | 0.000236854 | 1315    | 576.9   | -2.27942 |  |
|         |             |         |         |          | 0.0072015   | 1305.7  | 361.5   | -3.61189 |  |
|         |             |         |         |          | 7.68218E-08 | 4488.6  | 9557.05 | 2.12918  |  |
|         |             |         |         |          | 6.75656E-06 | #DIV/0! | 1521.38 | #DIV/0!  |  |
|         |             |         |         |          | 4.31261E-06 | 749.867 | 211.1   | -3.55219 |  |
|         |             |         |         |          | 0.000083312 | 1370.17 | 497.8   | -2.75244 |  |
|         | 2.19264E-10 | 9830    | 33730   | 3.43133  | 5.26201E-11 | 7241.08 | 23756.9 | 3.28085  |  |
| 2.37396 | 6.82649E-11 | 8967.45 | 37657.3 | 4.19933  | 1.26129E-11 | 5873.48 | 23814.8 | 4.05463  |  |
| 5.2658  | 1.46069E-06 | 1771.15 | 6835.63 | 3.85943  |             |         |         |          |  |
| 4.12058 | 7.71284E-06 | 1055.45 | 4600.45 | 4.35876  |             |         |         |          |  |
|         | 2.10313E-10 | 2419.78 | 8699.23 | 3.59506  | 4.05683E-06 | 3129.47 | 6303.3  | 2.01418  |  |
|         |             |         |         |          | 0.00681725  | 1590.18 | 627     | -2.53616 |  |
|         |             |         |         |          | 0.000223807 | #DIV/0! | 1954.48 | #DIV/0!  |  |
|         |             |         |         |          | 0.0148368   | 1718.3  | 341.875 | -5.02611 |  |
|         |             |         |         |          | 0.000487193 | 2331.98 | 607.567 | -3.83822 |  |
|         |             |         |         |          | 0.0173545   | 1639.65 | 496.9   | -3.29976 |  |
|         |             |         |         |          | 0.000131832 | 1431.48 | 378.633 | -3.78064 |  |
|         |             |         |         |          | 2.69556E-09 | 3422.28 | 6939.28 | 2.02768  |  |
|         | 1.70489E-05 | 1774.3  | 3576.75 | 2.01587  | 5.49333E-11 | 1396.95 | 4754.05 | 3.40316  |  |
|         | 7.55653E-11 | 3050.03 | 8088.4  | 2.65191  | 1.32798E-17 | 1874.85 | 10414.2 | 5.5547   |  |
|         | 6.60098E-06 | 4124.38 | 9030.03 | 2.18943  | 6.83823E-15 | 1698.85 | 11518.8 | 6.78034  |  |
|         | 0.0122196   | 639.375 | 229.2   | -2.78959 |             |         |         |          |  |
|         | 0.00887446  | 816.8   | 349.625 | -2.33622 |             |         |         |          |  |
|         | 3.66836E-06 | #DIV/0! | 1181.83 | #DIV/0!  | 8.9371E-09  | #DIV/0! | 2494.45 | #DIV/0!  |  |
|         |             |         |         |          | 0.000265133 | #DIV/0! | 1942.75 | #DIV/0!  |  |
| -3.6673 | 7.79794E-06 | 3893.28 | 1425.7  | -2.73078 |             |         |         |          |  |
|         |             |         |         |          | 0.0136019   | #DIV/0! | 1256.23 | #DIV/0!  |  |
| -2.2403 | 1.92109E-06 | 1281.93 | 2771.75 | 2.16218  |             |         |         |          |  |
|         |             |         |         |          | 0.000471821 | 1138.38 | 325     | -3.50269 |  |
|         |             |         |         |          | 4.64319E-07 | #DIV/0! | 1430.4  | #DIV/0!  |  |
|         | 1.45919E-07 | 1573.93 | 597.75  | -2.63308 | 4.0575E-10  | 3616.68 | 979.625 | -3.6919  |  |
|         | 0.000012627 | 727.467 | 273.4   | -2.66081 | 1.52007E-06 | 1525.83 | 425.3   | -3.58764 |  |
|         | 5.68477E-05 | 910.875 | 427.125 | -2.13257 | 2.98065E-08 | 1863.2  | 624.5   | -2.98351 |  |
|         |             |         |         |          | 6.32101E-07 | #DIV/0! | 1688.98 | #DIV/0!  |  |
|         |             |         |         |          | 2.20499E-06 | #DIV/0! | 2363.28 | #DIV/0!  |  |
|         |             |         |         |          | 6.99069E-08 | 4948.7  | 15179.4 | 3.06735  |  |
| -4.2051 | 1.91575E-08 | 7045.15 | 1295.15 | -5.43964 |             |         |         |          |  |
| -2.8347 | 6.88515E-07 | 4959.03 | 1205.33 | -4.11426 |             |         |         |          |  |
| -3.0026 | 1.41642E-08 | 5219.85 | 1279.2  | -4.08056 |             |         |         |          |  |
|         |             |         |         |          | 0.00184424  | #DIV/0! | 1233.2  | #DIV/0!  |  |
| -3.2059 | 8.27856E-05 | 4376.53 | 1890.6  | -2.31489 |             |         |         |          |  |
| -2.3936 |             |         |         |          | 1.90574E-05 | 2817.93 | 834.3   | -3.37759 |  |
|         |             |         |         |          | 6.18822E-06 | 2270.7  | 922.15  | -2.4624  |  |
|         | 0.00750322  | 692.925 | 322.25  | -2.15027 |             |         |         |          |  |
|         | 1.15606E-10 | 9487.95 | 30944.8 | 3.26148  | 5.31906E-17 | 3595.6  | 22536   | 6.26765  |  |
|         | 3.1861E-09  | 7887.65 | 28402.2 | 3.60084  | 3.63744E-16 | 2960.6  | 25122.1 | 8.48547  |  |
|         | 5.8412E-09  | 3911.33 | 8195.7  | 2.09538  | 3.5904E-13  | 2854.9  | 8235.98 | 2.88486  |  |
|         |             |         |         |          | 3.61987E-10 | 5346.53 | 12866   | 2.40642  |  |
|         |             |         |         |          | 5.03365E-05 | 2138.6  | 723.275 | -2.95683 |  |
| -2.7767 | 3.59083E-09 | 17832   | 4294.98 | -4.15182 | 0.000133978 | 5595.05 | 2630.68 | -2.12685 |  |
| -2.2247 | 2.7474E-06  | 11194.5 | 3583.25 | -3.12411 | 0.000332658 | 5251.13 | 2566.53 | -2.04601 |  |
| -2.2462 | 0.000015434 | 27597.6 | 9078.2  | -3.03998 |             |         |         |          |  |
|         |             |         |         |          | 1.22765E-05 | #DIV/0! | 2807.23 | #DIV/0!  |  |
|         | 2.16024E-05 | 1219.1  | 464.225 | -2.6261  |             |         |         |          |  |
|         | 0.000434513 | 679.6   | 326.75  | -2.07988 | 0.000896789 | 1267.08 | 546.9   | -2.31683 |  |
|         |             |         |         |          | 0.000513458 | 9028.15 | 3693.73 | -2.44419 |  |
|         | 5.29782E-05 | 1096.23 | 460.667 | -2.37967 |             |         |         |          |  |
|         |             |         |         |          | 9.91395E-11 | 1929.1  | 6806.08 | 3.52811  |  |



|         |             |         |         |          |             |         |         |          |
|---------|-------------|---------|---------|----------|-------------|---------|---------|----------|
|         | 1.61407E-09 | 1173.88 | 450.5   | -2.60572 |             |         |         |          |
|         | 1.53622E-08 | 1433.93 | 620.767 | -2.30993 |             |         |         |          |
|         | 0.00084959  | 755.8   | #DIV/0! | #DIV/0!  | 0.000729978 | 1603.13 | #DIV/0! | #DIV/0!  |
|         |             |         |         |          | 0.0159359   | 1334.47 | 654.4   | -2.03922 |
|         |             |         |         |          | 1.59236E-08 | 1425.7  | 264.4   | -5.39221 |
|         |             |         |         |          | 0.00900603  | 1050.57 | 341.3   | -3.07813 |
|         | 0.00699257  | 824.925 | 281.325 | -2.93228 | 0.00112089  | 2091.58 | 616.9   | -3.39046 |
|         | 0.000393013 | 2814.08 | 1242.68 | -2.26453 | 5.22483E-05 | 3701.23 | 1595.95 | -2.31914 |
|         |             |         |         |          | 0.00897317  | 938.967 | #DIV/0! | #DIV/0!  |
|         | 5.51625E-05 | 3213.45 | 1548.78 | -2.07483 |             |         |         |          |
|         | 7.88209E-06 | 1580.35 | 455.867 | -3.46669 | 0.000165895 | 2651.88 | 1000.98 | -2.64929 |
|         | 1.47022E-05 | 765.833 | 251.4   | -3.04627 | 0.00554677  | 1182.97 | 563.9   | -2.09783 |
|         | 0.0030331   | 567.575 | 217.9   | -2.60475 |             |         |         |          |
|         | 0.000149085 | 1864.98 | 418.025 | -4.4614  | 0.000215436 | 3968.15 | 1040.7  | -3.81296 |
|         | 0.000042017 | 908.533 | 275.967 | -3.29219 | 3.27334E-06 | 2421.3  | 496.125 | -4.88042 |
|         |             |         |         |          | 0.00140454  | #DIV/0! | 658.467 | #DIV/0!  |
| -3.3344 | 4.31437E-11 | 3814.63 | 1161.53 | -3.28413 |             |         |         |          |
|         |             |         |         |          | 8.87509E-10 | #DIV/0! | 3063.45 | #DIV/0!  |
| -2.318  | 4.68469E-09 | 4514.6  | 1409.95 | -3.20196 | 1.48638E-05 | 3214.33 | 1599.28 | -2.00986 |
| 2.3257  |             |         |         |          |             |         |         |          |
|         | 3.47866E-06 | 798.15  | 213.567 | -3.73724 | 0.000160474 | 4229.1  | 626.667 | -6.74856 |
| 2.49562 | 0.00044046  | 401.433 | 1186.48 | 2.9556   | 6.85063E-06 | 1398.13 | 513.533 | -2.72256 |
| -2.1818 | 2.84274E-08 | 4098.35 | 1185.28 | -3.45772 |             |         |         |          |
| -4.2697 | 3.42512E-05 | 4512.33 | 1498    | -3.01223 |             |         |         |          |
|         |             |         |         |          | 0.000434645 | 3146.9  | 972.775 | -3.23497 |
|         | 0.00059362  | 826.6   | #DIV/0! | #DIV/0!  |             |         |         |          |
|         |             |         |         |          | 0.0210533   | 726.467 | 266.9   | -2.72187 |
|         |             |         |         |          | 5.24734E-05 | 1514.27 | #DIV/0! | #DIV/0!  |
|         |             |         |         |          | 3.85629E-06 | 1648.83 | 737.725 | -2.23501 |
|         | 0.000678592 | 1096.05 | 521.725 | -2.10082 | 8.64717E-07 | 1560.95 | 518.775 | -3.00892 |
|         | 0.000010831 | 1880.43 | 826.35  | -2.27558 | 4.40597E-07 | 2222.63 | 852.45  | -2.60734 |
|         | 3.09949E-05 | 930.575 | 344.875 | -2.6983  |             |         |         |          |
|         |             |         |         |          | 0.000558967 | 1028.37 | #DIV/0! | #DIV/0!  |
|         |             |         |         |          | 0.00121574  | 807.933 | #DIV/0! | #DIV/0!  |
|         |             |         |         |          | 2.91585E-06 | 22286.5 | 8470.68 | -2.63101 |
|         |             |         |         |          | 0.0198522   | #DIV/0! | 2179    | #DIV/0!  |
|         |             |         |         |          | 2.59091E-05 | 1516.4  | 357     | -4.24762 |
|         |             |         |         |          | 0.002084    | 2395.55 | 575.267 | -4.16424 |
|         |             |         |         |          | 0.00104918  | 2902.5  | 1142.88 | -2.53965 |
| 2.54465 | 5.54661E-14 | 9073.73 | 38987.1 | 4.2967   | 1.06102E-06 | 1145.38 | 3840    | 3.35261  |
|         | 0.0011691   | 798.85  | 386.7   | -2.06581 | 7.2228E-16  | 5776.58 | 32807.6 | 5.67941  |
|         |             |         |         |          | 0.000301133 | 1052.93 | 300.25  | -3.50683 |
|         |             |         |         |          | 0.000872089 | 5118.98 | 2311.63 | -2.21445 |
|         |             |         |         |          | 2.58079E-06 | 5201.98 | 1250.1  | -4.16125 |
|         | 0.000111288 | 5670.25 | 15025.1 | 2.6498   |             |         |         |          |
|         | 5.93361E-06 | 1340.4  | #DIV/0! | #DIV/0!  | 4.58005E-05 | #DIV/0! | 3550.08 | #DIV/0!  |
|         | 1.28895E-05 | 1246.13 | #DIV/0! | #DIV/0!  | 1.98414E-10 | 1568    | 7934.98 | 5.06057  |
| 2.83516 | 1.0739E-07  | 1179.95 | 7709.08 | 6.53339  | 6.35929E-05 | 1597.15 | 661.875 | -2.41307 |
|         | 0.000448122 | 882.375 | 400.825 | -2.2014  | 2.41718E-05 | 3347.18 | 7518.28 | 2.24616  |
| -2.2545 |             |         |         |          |             |         |         |          |
|         | 4.08011E-11 | 2115    | 14176.9 | 6.70301  | 3.43307E-06 | 4396.78 | 10009.7 | 2.27659  |
| 2.77277 | 6.74591E-09 | 933.025 | 8308.98 | 8.90542  | 1.08571E-15 | 1828.78 | 25553.5 | 13.973   |
| 4.43188 | 1.93039E-10 | 4254.95 | 34827.7 | 8.18523  | 1.36593E-12 | 804.8   | 13456.2 | 16.7199  |
| 3.81769 |             |         |         |          | 8.61547E-15 | 3456.95 | 63301.3 | 18.3113  |
|         |             |         |         |          | 5.03297E-06 | 7612.73 | 3109.33 | -2.44835 |
|         |             |         |         |          | 0.000018434 | 2478.3  | 945.85  | -2.62018 |
|         | 4.36839E-05 | 1033.27 | 231     | -4.47302 | 1.17092E-06 | 2011.53 | 463.95  | -4.33565 |
|         |             |         |         |          | 0.0118913   | 1384.57 | 551.8   | -2.50918 |
|         | 0.000165733 | 978.8   | 463.467 | -2.11191 | 6.56084E-05 | 1816.93 | 556.325 | -3.26594 |

|             |             |         |          |             |         |         |          |
|-------------|-------------|---------|----------|-------------|---------|---------|----------|
| 0.000283205 | 1151.6      | #DIV/0! | #DIV/0!  |             |         |         |          |
| 1.66438E-05 | 3053.2      | 6424.48 | 2.10418  | 1.74551E-12 | 2102.15 | 9563.25 | 4.54927  |
|             |             |         |          | 7.63472E-15 | #DIV/0! | 13762.3 | #DIV/0!  |
| 2.70024E-08 | 7289.25     | 17506.7 | 2.40171  | 5.03313E-17 | 4146.25 | 25042.7 | 6.03984  |
| 1.48439E-05 | 5684.48     | 12097.5 | 2.12817  | 4.84135E-15 | 2772.2  | 20798.7 | 7.50258  |
| 3.02628E-05 | 1249.13     | 2815.23 | 2.25374  | 1.30341E-07 | #DIV/0! | 3548.55 | #DIV/0!  |
| 9.9621E-06  | 785.05      | 1655.98 | 2.10939  |             |         |         |          |
|             |             |         |          | 0.000614325 | #DIV/0! | 1284.27 | #DIV/0!  |
|             |             |         |          | 0.000965955 | 1843.78 | 848     | -2.17426 |
|             |             |         |          | 3.27691E-05 | #DIV/0! | 3196.1  | #DIV/0!  |
|             |             |         |          | 6.66669E-07 | 2447.48 | 1176    | -2.08119 |
|             |             |         |          | 0.0135636   | #DIV/0! | 1516.57 | #DIV/0!  |
|             |             |         |          | 2.01723E-05 | 1526.08 | 506.075 | -3.01551 |
|             |             |         |          | 9.08158E-05 | #DIV/0! | 1646.13 | #DIV/0!  |
|             |             |         |          | 0.0015471   | 1527.2  | 578.3   | -2.64084 |
| 8.00999E-10 | 1549.03     | 344.75  | -4.49318 | 3.39204E-10 | 2825.38 | 614.975 | -4.59429 |
| 3.14293E-05 | 520.867     | #DIV/0! | #DIV/0!  |             |         |         |          |
|             |             |         |          | 0.00174925  | 1739.45 | 388.167 | -4.48119 |
| 0.00134026  | 533.825     | 243.9   | -2.1887  | 0.000953008 | 1042.27 | 395.967 | -2.63221 |
|             |             |         |          | 4.93539E-06 | #DIV/0! | 2650.53 | #DIV/0!  |
| 1.55665E-07 | 8194.43     | 21185.4 | 2.58534  | 5.28294E-11 | 3249.7  | 12346   | 3.79911  |
| 4.22354E-07 | 6943.25     | 14985.9 | 2.15834  | 1.10743E-13 | 2867.18 | 12277.4 | 4.28206  |
|             |             |         |          | 4.98728E-16 | 4119.03 | 34294.4 | 8.32586  |
|             |             |         |          | 0.000031014 | #DIV/0! | 1067.48 | #DIV/0!  |
| 7.65893E-06 | 1070.85     | 410.2   | -2.61056 | 2.05342E-10 | 2118.18 | 721     | -2.93783 |
|             |             |         |          | 3.19789E-05 | 4802.2  | 14545.7 | 3.02896  |
|             |             |         |          | 8.03051E-07 | 4705.13 | 17076.3 | 3.6293   |
|             |             |         |          | 0.000426506 | #DIV/0! | 1544.43 | #DIV/0!  |
|             |             |         |          |             |         |         |          |
| 3.40015E-07 | 936.85      | 328.2   | -2.85451 | 0.00978566  | 1033.7  | 357.05  | -2.89511 |
|             |             |         |          | 3.41273E-05 | 3729.35 | 1427.33 | -2.61282 |
| 3.9318E-07  | 2812        | 839.967 | -3.34775 | 0.0105889   | #DIV/0! | 1022.17 | #DIV/0!  |
|             |             |         |          | 0.00125457  | 1744.87 | 507.4   | -3.43884 |
| 0.000676039 | 918.567     | 254.4   | -3.61072 |             |         |         |          |
| 0.0028407   | #DIV/0!     | 795.6   | #DIV/0!  | 0.000326243 | 1062    | 504.075 | -2.10683 |
| #DIV/0!     | 0.00129198  | 640.5   | 1825.4   | 0.00548484  | #DIV/0! | 1721.4  | #DIV/0!  |
| -4.2889     | 2.50022E-07 | 35660.1 | 12690.6  | -2.80997    |         |         |          |
| -3.1161     |             |         |          |             |         |         |          |
|             |             |         |          | 5.94283E-11 | 1824.35 | 5037.58 | 2.7613   |
| 3.98534E-08 | 3371.78     | 7343.38 | 2.1779   | 3.17868E-06 | 3037.15 | 545.55  | -5.56713 |
| 1.05258E-05 | 1394.45     | 346     | -4.0302  | 5.45353E-05 | 4678.93 | 1391.1  | -3.36348 |
|             |             |         |          | 8.81709E-05 | 3579.77 | #DIV/0! | #DIV/0!  |
|             |             |         |          | 9.15738E-12 | 10428.9 | 21828.3 | 2.09306  |
|             |             |         |          | 0.00289343  | 1590.55 | 386.667 | -4.11349 |
|             |             |         |          | 0.00046379  | 1198.7  | 500.4   | -2.39548 |
|             |             |         |          | 0.000767873 | 964.875 | #DIV/0! | #DIV/0!  |
|             |             |         |          | 0.00251204  | 1007.1  | #DIV/0! | #DIV/0!  |
|             |             |         |          |             |         |         |          |
| 0.00152254  | 915.867     | #DIV/0! | #DIV/0!  | 0.000016404 | 4465.55 | 1028.88 | -4.34023 |
| 0.000501064 | 1720.63     | 501.125 | -3.43352 |             |         |         |          |
| 0.000141689 | 2589.25     | 1069    | -2.42212 |             |         |         |          |
|             |             |         |          | 6.17377E-06 | 1432.17 | 404.6   | -3.53971 |
| 0.000276363 | 4026.8      | 1853.4  | -2.17266 |             |         |         |          |
|             |             |         |          | 0.0177376   | 809.6   | 328.7   | -2.46304 |
|             |             |         |          | 1.14249E-05 | 1092.95 | 364.033 | -3.00233 |
|             |             |         |          | 0.00240941  | #DIV/0! | 913.975 | #DIV/0!  |
|             |             |         |          | 0.000488434 | 1654.88 | 784.125 | -2.11047 |
|             |             |         |          | 1.66904E-06 | 2293    | 738.867 | -3.1034  |
|             |             |         |          | 1.27718E-05 | 1146.9  | 484     | -2.36963 |
|             |             |         |          | 3.63929E-10 | 1857.9  | 3966.4  | 2.13488  |
|             |             |         |          | 0.00015288  | #DIV/0! | 2342.03 | #DIV/0!  |
|             |             |         |          | 1.90443E-07 | 3056.58 | 8487.15 | 2.77669  |
|             |             |         |          | 0.000157578 | 2116.1  | 554     | -3.81968 |

|         |             |         |         |          |             |         |         |          |
|---------|-------------|---------|---------|----------|-------------|---------|---------|----------|
| -2.0754 | 7.53192E-06 | 1712.2  | 466.875 | -3.66736 | 0.00011509  | 3378.78 | 1219.35 | -2.77096 |
|         |             |         |         |          | 0.0128943   | 1430.48 | 564.15  | -2.53563 |
|         |             |         |         |          | 0.0129512   | 1476.7  | 286.4   | -5.15608 |
|         |             |         |         |          | 4.10641E-07 | 1788.1  | 529.45  | -3.37728 |
|         | 2.77952E-05 | 2755.05 | 5810.55 | 2.10905  | 9.83027E-07 | 2687.08 | 6703.08 | 2.49456  |
|         | 1.20343E-06 | 1180.23 | 3603.93 | 3.05357  | 2.19096E-07 | #DIV/0! | 4089.48 | #DIV/0!  |
| 2.32996 | 1.40268E-05 | 1814.43 | 435.675 | -4.16463 | 0.000063398 | 3900.58 | 1069.7  | -3.64642 |
|         |             |         |         |          | 9.08363E-12 | #DIV/0! | 1900.45 | #DIV/0!  |
|         | 0.000001079 | 11731.6 | 3929.55 | -2.98549 | 2.63045E-07 | 7175.58 | 2334    | -3.07437 |
| -2.2321 |             |         |         |          | 0.000095707 | 944.033 | #DIV/0! | #DIV/0!  |
|         |             |         |         |          | 0.0080489   | #DIV/0! | 719.367 | #DIV/0!  |
|         |             |         |         |          | 1.97611E-08 | 14667.7 | 36869.7 | 2.51367  |
|         | 1.53687E-06 | 1112.83 | 4493.8  | 4.03816  | 3.39017E-06 | 1767.2  | 7119.9  | 4.02892  |
| 3.8964  | 0.000830458 | 665.4   | 3819.78 | 5.74057  | 1.66658E-05 | 1338.5  | 6905.95 | 5.15947  |
|         |             |         |         |          | 0.0108411   | #DIV/0! | 755.633 | #DIV/0!  |
|         |             |         |         |          | 0.00618416  | 1084.43 | 482.5   | -2.24753 |
|         | 0.000123711 | #DIV/0! | 2679.43 | #DIV/0!  |             |         |         |          |
| #DIV/0! |             |         |         |          |             |         |         |          |
| 2.5604  | 1.19931E-07 | 1731.45 | 4834.68 | 2.79227  | 1.99753E-10 | #DIV/0! | 5961.65 | #DIV/0!  |
| 4.67275 | 2.08503E-06 | #DIV/0! | 1451.48 | #DIV/0!  | 2.87161E-08 | #DIV/0! | 1608.38 | #DIV/0!  |
| 4.71227 | 4.22411E-07 | #DIV/0! | 2666.18 | #DIV/0!  | 4.39236E-10 | #DIV/0! | 2648.5  | #DIV/0!  |
|         |             |         |         |          | 8.69966E-05 | 2649.4  | 6527.13 | 2.46362  |
|         | 0.0035229   | 6720.38 | 2056.15 | -3.26843 | 6.72303E-05 | 11221.3 | 2267.33 | -4.94915 |
|         | 0.00723027  | 2478.95 | 907.425 | -2.73185 | 0.00109042  | 3286.23 | 1088.33 | -3.01953 |
|         |             |         |         |          | 5.84085E-05 | 1102.6  | 443.15  | -2.4881  |
|         |             |         |         |          | 0.000387921 | 910.2   | 422.025 | -2.15674 |
|         | 0.000286652 | 1416.68 | 573     | -2.47238 | 8.96494E-06 | 2862.5  | 837.225 | -3.41903 |
|         |             |         |         |          | 7.32912E-05 | 3959.53 | 8993.43 | 2.27133  |
|         |             |         |         |          | 0.00551334  | 2382.88 | 694.2   | -3.43255 |
| -2.4706 | 1.22079E-06 | 4369.18 | 1371.67 | -3.1853  | 6.06086E-05 | 3728.48 | 8365    | 2.24354  |
|         | 1.51251E-05 | 3847.9  | 9490.35 | 2.46637  | 0.000522885 | 1493.27 | 688.567 | -2.16866 |
|         |             |         |         |          | 8.69036E-15 | 10275.8 | 25409.5 | 2.47275  |
|         | 1.21093E-06 | 1673.53 | 410.925 | -4.07258 | 9.59385E-06 | 2384.45 | 803.567 | -2.96733 |
| -3.7462 | 1.66595E-10 | 4146.2  | 723.067 | -5.73419 | 1.46693E-05 | 4713.53 | 1746.63 | -2.69865 |
|         | 0.00355714  | 1725.73 | 472.433 | -3.65284 |             |         |         |          |
|         | 0.00172324  | 2908.53 | #DIV/0! | #DIV/0!  |             |         |         |          |
| -3.5673 |             |         |         |          |             |         |         |          |
|         |             |         |         |          | 2.36601E-13 | 2724.33 | 8641.85 | 3.17211  |
|         |             |         |         |          | 2.73186E-05 | 2651.05 | 862.95  | -3.07208 |
|         |             |         |         |          | 0.000513551 | 1455.55 | 281.4   | -5.17253 |
| 3.52218 | 2.4907E-13  | 3079    | 21602.9 | 7.01621  | 9.35879E-17 | 1948.9  | 21178.7 | 10.867   |
|         |             |         |         |          | 4.23443E-08 | 2051.85 | 877.175 | -2.33916 |
|         |             |         |         |          | 0.000219977 | 3678.6  | 9120.18 | 2.47925  |
|         |             |         |         |          | 0.0156503   | 4294.78 | 1643.53 | -2.61315 |
|         | 0.000052422 | 1200.3  | #DIV/0! | #DIV/0!  |             |         |         |          |
| -3.2114 | 9.62501E-05 | 2910.45 | 854.175 | -3.40732 | 9.17568E-05 | 2153.43 | 687.75  | -3.13112 |
| -2.7028 | 0.00160717  | 2182.03 | 899.75  | -2.42515 | 6.74389E-05 | 2212.25 | 761.425 | -2.90541 |
|         | 0.00509461  | 1729.1  | 747.025 | -2.31465 | 0.000196503 | 1732.43 | 670.8   | -2.58263 |
|         | 0.00325879  | 2836.2  | 1268.83 | -2.2353  | 0.00184644  | 2406.83 | 1105.55 | -2.17704 |
|         | 0.00456705  | 758.267 | #DIV/0! | #DIV/0!  |             |         |         |          |
|         |             |         |         |          | 1.05202E-08 | 9825.88 | 31033.4 | 3.15834  |
|         |             |         |         |          | 0.00420129  | 822.467 | 135.4   | -6.07435 |

|         |             |         |         |          |             |         |         |          |
|---------|-------------|---------|---------|----------|-------------|---------|---------|----------|
|         | 0.00644719  | 1172.58 | #DIV/0! | #DIV/0!  | 3.18184E-06 | 2550.75 | #DIV/0! | #DIV/0!  |
|         | 2.98304E-15 | 4547.25 | 14824.7 | 3.26014  | 2.01166E-21 | 3198.43 | 21037.8 | 6.57755  |
|         | 0.000203759 | 2372.93 | 4794.55 | 2.02052  |             |         |         |          |
|         | 1.34034E-05 | 3413.63 | 1526.6  | -2.2361  | 1.58317E-05 | 5132.25 | 2442.38 | -2.10134 |
| -2.058  |             |         |         |          |             |         |         |          |
|         |             |         |         |          | 1.25876E-10 | 4891.25 | 11725.8 | 2.3973   |
|         |             |         |         |          | 4.83724E-13 | 2453.25 | 8246.83 | 3.36159  |
| -3.4063 | 2.14751E-08 | 2738.23 | 563.933 | -4.85558 | 6.63103E-10 | 2655.1  | 442.4   | -6.00158 |
|         | 0.000564253 | 794.067 | 211.7   | -3.75091 | 0.000102421 | 1710.97 | 641.7   | -2.6663  |
|         | 3.03076E-08 | 682.025 | #DIV/0! | #DIV/0!  | 8.19631E-06 | 956.025 | #DIV/0! | #DIV/0!  |
| -2.1716 |             |         |         |          |             |         |         |          |
|         |             |         |         |          | 0.00339081  | 1820.23 | 546.667 | -3.32968 |
|         | 7.64128E-06 | 936.767 | #DIV/0! | #DIV/0!  | 0.000495373 | 1745.6  | 552.2   | -3.16117 |
|         | 0.00124413  | 620.65  | 192.133 | -3.23031 | 0.000931113 | 1829.93 | 620.2   | -2.95055 |
|         |             |         |         |          | 0.000444024 | #DIV/0! | 3038.37 | #DIV/0!  |
|         |             |         |         |          | 0.00738065  | 1079.45 | 312.9   | -3.44982 |
|         |             |         |         |          | 0.0112025   | 2061.3  | 743.45  | -2.77261 |
|         | 8.68318E-06 | 1982.65 | 799.3   | -2.48048 | 9.71195E-10 | 5784.05 | 1295.28 | -4.4655  |
|         |             |         |         |          | 0.000104224 | 3743.13 | 1238.97 | -3.02117 |
|         |             |         |         |          | 2.77216E-07 | 2904.73 | 1212.6  | -2.39545 |
|         |             |         |         |          | 2.32603E-12 | 13928.3 | 33696.7 | 2.41931  |
|         |             |         |         |          | 1.38578E-05 | 1957.05 | 696.5   | -2.80983 |
|         | 3.25571E-07 | 978.125 | 367.6   | -2.66084 | 0.000379881 | 1423.68 | 616.6   | -2.30891 |
|         | 4.26175E-05 | 1182.95 | 443.1   | -2.66971 |             |         |         |          |
| #DIV/0! | 0.00677262  | #DIV/0! | 885.775 | #DIV/0!  | 5.16398E-06 | 522.733 | #DIV/0! | #DIV/0!  |
|         |             |         |         |          | 0.0177857   | #DIV/0! | 1063.6  | #DIV/0!  |
|         |             |         |         |          | 8.72375E-06 | 1617.78 | 345.767 | -4.67881 |
|         |             |         |         |          | 2.33542E-08 | #DIV/0! | 2814.5  | #DIV/0!  |
|         |             |         |         |          | 2.4196E-08  | #DIV/0! | 1438.58 | #DIV/0!  |
|         |             |         |         |          | 0.00297294  | #DIV/0! | 2185.9  | #DIV/0!  |
|         | 0.000336347 | 1214.28 | 590.8   | -2.05531 |             |         |         |          |
|         | 3.01915E-06 | 7671.93 | 16431.2 | 2.14173  |             |         |         |          |
|         |             |         |         |          | 4.89696E-05 | 2746.25 | 781.067 | -3.51603 |
|         |             |         |         |          | 0.00918021  | 908.967 | 355.6   | -2.55615 |
|         | 0.00120648  | 16479.1 | 38674.1 | 2.34686  | 2.84409E-08 | 6400.88 | 33396.1 | 5.21742  |
| 2.74515 | 3.88675E-07 | 3464.95 | 14210.4 | 4.10118  | 2.48987E-11 | 2595.45 | 14581.2 | 5.61798  |
| 2.57271 | 2.29561E-08 | 6577.2  | 23387.7 | 3.55588  | 8.02307E-12 | 3918.68 | 23861.1 | 6.08907  |
|         | 1.62885E-05 | #DIV/0! | 819.5   | #DIV/0!  |             |         |         |          |
|         | 8.15419E-05 | 4016.93 | 8102.43 | 2.01707  | 2.82754E-08 | #DIV/0! | 5438.4  | #DIV/0!  |
|         |             |         |         |          | 0.000648502 | 2044    | #DIV/0! | #DIV/0!  |
| 2.03027 |             |         |         |          |             |         |         |          |
| 2.35621 |             |         |         |          |             |         |         |          |
| 2.96998 |             |         |         |          |             |         |         |          |
| 3.05239 |             |         |         |          |             |         |         |          |
| 2.49931 |             |         |         |          |             |         |         |          |
|         |             |         |         |          | 0.00553888  | 1907.98 | 709.1   | -2.6907  |
|         |             |         |         |          | 0.0125583   | 1409.27 | #DIV/0! | #DIV/0!  |
|         | 1.79275E-05 | 1740.65 | 710.875 | -2.4486  | 3.43309E-05 | 2611.75 | 1083.03 | -2.41153 |
| -3.5743 | 1.40901E-06 | 2532.68 | 596.05  | -4.2491  | 5.08536E-06 | 2939.75 | 789     | -3.72592 |
| -2.7331 | 3.89909E-07 | 2555.83 | 879.45  | -2.90616 | 1.47952E-06 | 3249.45 | 1136.33 | -2.85961 |
|         |             |         |         |          | 1.0872E-07  | 94313   | 197734  | 2.09657  |
|         |             |         |         |          | 3.15348E-11 | 17622.9 | 50274.4 | 2.85279  |
|         |             |         |         |          | 2.39251E-12 | 17137   | 52091.2 | 3.03969  |
|         |             |         |         |          | 6.02675E-12 | 17534.8 | 53774.2 | 3.06671  |
|         |             |         |         |          | 7.83247E-07 | #DIV/0! | 710.833 | #DIV/0!  |
|         |             |         |         |          | 1.58224E-14 | 12365.9 | 33809.7 | 2.73412  |
|         | 1.09656E-06 | 4727.5  | 1769.65 | -2.67143 | 1.00943E-12 | 2794.58 | 430.6   | -6.48996 |
| 4.2957  | 1.46708E-05 | 1264.28 | 5813.28 | 4.59811  | 7.87878E-06 | 1797.65 | 8516.75 | 4.73771  |
|         | 0.000513404 | 781.475 | 259.5   | -3.01146 | 0.00131654  | 1421.3  | 396.15  | -3.58778 |
|         | 1.06335E-07 | 2338.38 | 865.175 | -2.70278 | 8.61687E-06 | 3261.38 | 1585.83 | -2.05658 |
|         | 7.28087E-06 | 1367.93 | 515.875 | -2.65166 | 2.97134E-06 | 2062.88 | 732.075 | -2.81785 |

|         |             |         |         |          |             |         |         |          |
|---------|-------------|---------|---------|----------|-------------|---------|---------|----------|
|         | 2.9108E-07  | 1391.2  | 632.1   | -2.20092 |             |         |         |          |
|         | 1.2854E-07  | 4649.35 | 2191.15 | -2.12188 |             |         |         |          |
|         |             |         |         |          | 1.00246E-14 | 2763.55 | 14573.2 | 5.27337  |
| -2.4963 |             |         |         |          |             |         |         |          |
| -2.2493 |             |         |         |          |             |         |         |          |
| -2.2156 |             |         |         |          |             |         |         |          |
|         | 0.000218812 | 1877.58 | 687.275 | -2.73191 |             |         |         |          |
| -2.0721 | 0.000479137 | 1467.9  | 630.825 | -2.32695 |             |         |         |          |
|         |             |         |         |          | 2.05831E-08 | 7075.33 | 14598.6 | 2.06331  |
|         | 6.4706E-06  | 1346.58 | 547.9   | -2.4577  |             |         |         |          |
|         | 9.88044E-06 | 868.225 | 283.45  | -3.06306 |             |         |         |          |
|         | 1.95646E-05 | 2003.95 | 788.2   | -2.54244 |             |         |         |          |
|         | 0.000010535 | 1363.15 | 579.95  | -2.35046 |             |         |         |          |
|         | 0.00255667  | 2394.7  | 941.8   | -2.54268 |             |         |         |          |
|         | 0.000751297 | 3481.73 | 1469.2  | -2.36982 |             |         |         |          |
|         |             |         |         |          | 2.22116E-11 | 7938.85 | 21342.2 | 2.68832  |
|         |             |         |         |          | 0.001444481 | 12397.4 | 4511.13 | -2.74818 |
|         |             |         |         |          | 0.000984277 | 1481.15 | 659.425 | -2.24612 |
|         | 5.81239E-05 | 545.3   | #DIV/0! | #DIV/0!  | 0.000542837 | 1096.43 | 251.7   | -4.35611 |
|         | 0.00811632  | 2930.4  | 1441.23 | -2.03327 |             |         |         |          |
|         | 1.32244E-11 | 6055.25 | 16009.4 | 2.64389  | 4.23681E-18 | 4147.93 | 18974.3 | 4.57441  |
|         |             |         |         |          | 0.0137524   | 2715.75 | 1330.6  | -2.041   |
| -2.4705 | 4.54962E-12 | 1707.4  | 508.633 | -3.35684 | 2.55359E-10 | 1759.7  | 649.5   | -2.70931 |
|         |             |         |         |          | 1.42431E-07 | 2008.68 | 4117.68 | 2.04995  |
|         |             |         |         |          | 1.11298E-08 | 1342.15 | 3004.35 | 2.23846  |
|         |             |         |         |          | 4.56912E-05 | 2135.1  | 982.325 | -2.17352 |
| -2.558  | 0.000722852 | 1034.7  | 415.55  | -2.48995 |             |         |         |          |
| 2.4327  | 6.88408E-09 | 1504.9  | 4635.15 | 3.08004  | 1.17642E-07 | #DIV/0! | 4372.9  | #DIV/0!  |
| #DIV/0! |             |         |         |          |             |         |         |          |
|         |             |         |         |          | 2.35193E-12 | 1710.3  | 6704.35 | 3.91998  |
|         |             |         |         |          | 0.00362156  | #DIV/0! | 2182.38 | #DIV/0!  |
|         | 1.17988E-05 | 773.133 | 1679.78 | 2.17268  | 8.43455E-06 | #DIV/0! | 1302.9  | #DIV/0!  |
|         |             |         |         |          | 4.49929E-11 | 4733.13 | 16156.1 | 3.41341  |
|         |             |         |         |          | 2.77708E-12 | 15706.2 | 36772.1 | 2.34126  |
|         | 4.99406E-09 | 5588.58 | 11622.6 | 2.07971  | 1.33315E-17 | 2848.53 | 11311.9 | 3.97113  |
|         | 5.4469E-10  | 6609.9  | 14328.5 | 2.16773  | 1.07642E-18 | 3298.7  | 14479.3 | 4.38938  |
|         | 0.000102014 | 1209.03 | 503.2   | -2.40269 |             |         |         |          |
|         | 0.000314354 | 950.575 | 261.1   | -3.64065 | 2.1493E-07  | 2536.78 | 533.375 | -4.75608 |
|         |             |         |         |          | 0.00126501  | 1282    | 558.3   | -2.29626 |
|         | 0.00129833  | 2987.5  | 1097.03 | -2.72325 |             |         |         |          |
|         | 3.15468E-06 | 829.65  | 311.55  | -2.66298 |             |         |         |          |
|         | 0.000469084 | 779.2   | 368.333 | -2.11548 |             |         |         |          |
|         |             |         |         |          | 0.000173998 | 4030.2  | 1007.28 | -4.00109 |
|         |             |         |         |          | 6.35231E-09 | 12204.4 | 26441   | 2.16651  |
|         |             |         |         |          | 5.19732E-08 | 8220.18 | 21446.7 | 2.60903  |
|         | 0.000843183 | 619.833 | 242.1   | -2.56024 | 0.00413684  | #DIV/0! | 789.633 | #DIV/0!  |
|         | 1.38331E-05 | 1053.03 | #DIV/0! | #DIV/0!  | 0.000515993 | 1647.55 | 714.8   | -2.30491 |
|         | 6.15878E-07 | 2145.23 | 855.8   | -2.50669 | 1.55113E-05 | 2470.6  | 1163.43 | -2.12356 |
|         | 0.0014354   | 1773.65 | 710.275 | -2.49713 |             |         |         |          |
|         | 0.000565113 | 878.4   | #DIV/0! | #DIV/0!  |             |         |         |          |
| 2.20635 | 6.33956E-09 | 2046.38 | 5850.13 | 2.85877  | 1.73426E-09 | 1259.95 | 3808.85 | 3.02302  |
| 2.65505 | 0.000020262 | 1161.65 | 3352.7  | 2.88615  | 1.04384E-06 | #DIV/0! | 1929.98 | #DIV/0!  |
| 2.14412 | 2.49084E-06 | 1037.38 | 2880.03 | 2.77626  |             |         |         |          |
|         | 1.75459E-05 | 2978.23 | 8540.2  | 2.86755  | 2.44079E-06 | 2464.48 | 7165.1  | 2.90735  |
| 2.51526 | 3.42147E-07 | #DIV/0! | 2381.05 | #DIV/0!  | 7.38855E-12 | #DIV/0! | 2074.88 | #DIV/0!  |
|         | 0.000768901 | 721.175 | 1548.63 | 2.14736  |             |         |         |          |
| -2.3758 |             |         |         |          |             |         |         |          |
|         | 3.38863E-07 | 1690.3  | 663.9   | -2.54602 | 4.79222E-08 | 2143.28 | 852.025 | -2.51551 |
|         |             |         |         |          | 0.000389455 | 1266.1  | 571.4   | -2.21579 |
|         | 0.00118642  | 1443.03 | 694.8   | -2.07689 |             |         |         |          |
|         | 0.00243818  | 684.333 | 173.3   | -3.94884 | 0.000214722 | 1310.98 | 410.367 | -3.19464 |
|         |             |         |         |          | 0.00789004  | 1230.9  | #DIV/0! | #DIV/0!  |

|         |             |         |         |          |             |         |         |          |
|---------|-------------|---------|---------|----------|-------------|---------|---------|----------|
|         |             |         |         |          | 1.96011E-05 | #DIV/0! | 1954.45 | #DIV/0!  |
|         |             |         |         |          | 0.0231167   | #DIV/0! | 564.667 | #DIV/0!  |
|         |             |         |         |          | 0.0191933   | 984.967 | #DIV/0! | #DIV/0!  |
| 2.88733 | 0.00240065  | #DIV/0! | 2209.55 | #DIV/0!  | 0.0166827   | #DIV/0! | 1887.08 | #DIV/0!  |
|         |             |         |         |          | 0.0143418   | 858.2   | 426.1   | -2.01408 |
| 2.25243 |             |         |         |          | 0.00014952  | #DIV/0! | 2459.38 | #DIV/0!  |
| 2.71912 | 0.000021803 | 1009.7  | 2454.2  | 2.43062  |             |         |         |          |
| 2.85939 | 5.97354E-06 | 3409.88 | 9236.58 | 2.70877  |             |         |         |          |
| 2.74757 | 0.000126945 | 1603.95 | 4525.63 | 2.82155  |             |         |         |          |
| 2.57149 |             |         |         |          |             |         |         |          |
| 2.7375  |             |         |         |          |             |         |         |          |
| 3.01748 |             |         |         |          |             |         |         |          |
|         | 0.00481286  | 579.325 | 218.45  | -2.65198 | 7.56605E-05 | 1435.3  | 380     | -3.77711 |
|         |             |         |         |          | 0.00105164  | 996.333 | 310.7   | -3.20674 |
|         | 0.0128335   | 1291.1  | #DIV/0! | #DIV/0!  | 0.00832087  | 1213.97 | #DIV/0! | #DIV/0!  |
| 2.0336  | 2.94131E-10 | 5290.28 | 15689.2 | 2.96566  | 8.09068E-08 | 4836.33 | 11209.2 | 2.31771  |
|         |             |         |         |          | 0.00232915  | 1547.28 | 762.8   | -2.02842 |
|         | 9.77885E-05 | 34349.7 | 13790.9 | -2.49074 |             |         |         |          |
|         |             |         |         |          | 1.11295E-06 | 7548.1  | 16813.5 | 2.22751  |
|         |             |         |         |          | 0.0105225   | 2283.1  | 1024.9  | -2.22763 |
|         |             |         |         |          | 0.000449387 | 945.475 | 334.1   | -2.82992 |
|         |             |         |         |          | 0.000548948 | 1259.07 | 484.775 | -2.59722 |
| 11.4209 | 1.03438E-14 | 5309.65 | 107742  | 20.2917  | 1.04266E-14 | 12693.6 | 153878  | 12.1225  |
| 11.6106 | 2.23864E-14 | 2820.83 | 79801   | 28.2899  | 2.34978E-14 | 7213.7  | 100345  | 13.9104  |
| 12.7267 | 9.68319E-08 | #DIV/0! | 3608.7  | #DIV/0!  | 2.78025E-08 | #DIV/0! | 4066.7  | #DIV/0!  |
| #DIV/0! | 7.38506E-10 | #DIV/0! | 11387.1 | #DIV/0!  | 5.8191E-10  | 1584.3  | 21854.6 | 13.7945  |
|         |             |         |         |          | 0.000910663 | #DIV/0! | 2129.28 | #DIV/0!  |
|         |             |         |         |          | 0.0221376   | #DIV/0! | 2658.27 | #DIV/0!  |
|         | 0.000216452 | 633.675 | 287.867 | -2.20128 | 7.05195E-06 | 999.45  | 378.5   | -2.64055 |
|         |             |         |         |          | 0.000138071 | 2851.85 | 733.7   | -3.88694 |
|         |             |         |         |          | 0.000108031 | 503.3   | #DIV/0! | #DIV/0!  |
|         |             |         |         |          | 8.56672E-10 | 2794.93 | 719.067 | -3.88688 |
|         |             |         |         |          | 0.0161436   | 754.075 | 246.75  | -3.05603 |
|         | 3.75937E-06 | 4341.28 | 1842    | -2.35683 | 1.38303E-10 | 3366.13 | 837.35  | -4.01997 |
| -2.2991 | 2.4435E-07  | 6990.13 | 2442.55 | -2.86181 | 1.88981E-08 | 4629.23 | 1473.98 | -3.14064 |
| -2.2189 | 1.57905E-05 | 3015.1  | 1228.88 | -2.45354 | 1.36521E-06 | 2019.55 | 706.6   | -2.85812 |
| -2.4915 |             |         |         |          |             |         |         |          |
|         | 0.00768254  | 651.175 | #DIV/0! | #DIV/0!  |             |         |         |          |
|         |             |         |         |          | 4.00766E-06 | 882.533 | 196.6   | -4.48898 |
|         |             |         |         |          | 7.46327E-05 | 1500.3  | 631.6   | -2.3754  |
|         |             |         |         |          | 2.62304E-08 | 4474.35 | 10729.9 | 2.39808  |
|         |             |         |         |          | 3.71673E-06 | 3299.05 | 782.375 | -4.21671 |
|         |             |         |         |          | 0.000136747 | 3138.9  | 6326.03 | 2.01536  |
|         |             |         |         |          | 0.00309779  | 2534.8  | 5969.15 | 2.35488  |
| -2.801  |             |         |         |          |             |         |         |          |
| -2.2292 |             |         |         |          |             |         |         |          |
|         |             |         |         |          | 0.00215308  | #DIV/0! | 625.05  | #DIV/0!  |
|         | 7.88351E-07 | 3202    | 1582.55 | -2.02332 |             |         |         |          |
|         | 0.000723096 | 1198.4  | 295.975 | -4.04899 | 0.00373983  | 3114.55 | 1015.55 | -3.06686 |
|         |             |         |         |          | 0.000643481 | 1503.75 | 286.1   | -5.25603 |
| -2.5896 |             |         |         |          |             |         |         |          |
|         | 3.27019E-05 | 511.567 | #DIV/0! | #DIV/0!  | 8.66194E-05 | 1518.43 | #DIV/0! | #DIV/0!  |
|         |             |         |         |          | 5.12585E-05 | 7634    | 3181.65 | -2.39938 |
|         |             |         |         |          | 0.000736943 | #DIV/0! | 944.233 | #DIV/0!  |
|         |             |         |         |          | 0.0107614   | #DIV/0! | 1277.2  | #DIV/0!  |
|         | 2.12229E-08 | 3654.03 | 1714.55 | -2.13119 |             |         |         |          |
|         | 1.05703E-07 | 1573.78 | 3373.65 | 2.14367  | 2.29349E-10 | 1030.43 | 2612.75 | 2.5356   |
|         | 7.61859E-09 | 1821.15 | 4210.93 | 2.31223  | 5.48531E-09 | #DIV/0! | 2842.2  | #DIV/0!  |
|         |             |         |         |          | 3.19099E-07 | #DIV/0! | 2733    | #DIV/0!  |
|         |             |         |         |          | 0.00035089  | 6860.1  | 1003.08 | -6.83907 |
|         | 0.000956797 | 1501.68 | 392.4   | -3.8269  | 0.00046104  | 1661.43 | 316     | -5.25767 |
|         |             |         |         |          | 1.15954E-10 | 16074.9 | 51475.7 | 3.20224  |

|         |             |         |         |          |             |         |         |          |
|---------|-------------|---------|---------|----------|-------------|---------|---------|----------|
|         | 2.43492E-06 | 16932.6 | 34727   | 2.0509   | 2.71615E-13 | 7425.18 | 28664   | 3.86037  |
|         | 0.00114945  | 904.667 | 403.3   | -2.24316 | 0.000403632 | 2012.4  | 373.8   | -5.38363 |
|         |             |         |         |          | 0.0195601   | 1497    | 559.233 | -2.67688 |
|         |             |         |         |          | 0.0012141   | 1135.08 | 511.367 | -2.21969 |
| #DIV/0! | 0.000229094 | 1214.28 | #DIV/0! | #DIV/0!  | 0.000335009 | 2474.48 | 813.133 | -3.04314 |
|         | 2.18049E-05 | 1682.05 | 4422.03 | 2.62895  | 5.25329E-06 | #DIV/0! | 2206.75 | #DIV/0!  |
|         |             |         |         |          | 1.3525E-06  | 2630.35 | 5670.83 | 2.15592  |
|         |             |         |         |          | 1.41201E-07 | 2243.45 | 6355.53 | 2.83292  |
| -2.468  |             |         |         |          |             |         |         |          |
| 6.06558 | 1.94871E-09 | 1873.65 | 34374.6 | 18.3463  | 2.50305E-11 | 4683.1  | 36066.2 | 7.70135  |
| 5.45712 | 2.59779E-14 | 5245.98 | 78846.9 | 15.03    | 2.52897E-17 | 4956.78 | 94585.1 | 19.082   |
|         |             |         |         |          | 8.7347E-06  | #DIV/0! | 3028.13 | #DIV/0!  |
|         | 2.48864E-09 | 1319.48 | 364.8   | -3.61698 | 2.80214E-09 | 1725    | 529.15  | -3.25995 |
| #DIV/0! | 0.00289353  | #DIV/0! | 2591.73 | #DIV/0!  |             |         |         |          |
|         | 0.00162105  | 736     | #DIV/0! | #DIV/0!  |             |         |         |          |
| 2.02968 | 4.89974E-15 | 4767.08 | 15216.7 | 3.19205  | 7.70753E-14 | 4021.28 | 11255.2 | 2.7989   |
|         | 3.64532E-05 | 959.575 | 2166.9  | 2.25819  |             |         |         |          |
|         |             |         |         |          | 0.00713613  | 1117.75 | 467.567 | -2.39057 |
|         |             |         |         |          | 7.68563E-09 | 1876.8  | 599.1   | -3.1327  |
|         |             |         |         |          | 0.00643179  | 954.15  | 402.875 | -2.36835 |
|         | 1.66639E-07 | 1313.7  | 447.1   | -2.93827 | 4.70566E-08 | 2747.07 | 905.4   | -3.03409 |
|         |             |         |         |          | 0.00152595  | 1398.95 | #DIV/0! | #DIV/0!  |
| #DIV/0! | 5.43737E-06 | #DIV/0! | 2216.13 | #DIV/0!  | 4.20105E-06 | #DIV/0! | 3256.6  | #DIV/0!  |
| 4.18861 | 1.95283E-06 | 782.467 | 2072.55 | 2.64874  |             |         |         |          |
|         |             |         |         |          | 1.5255E-08  | 3232.75 | 612.6   | -5.2771  |
|         | 6.87185E-10 | 8266.8  | 19980.6 | 2.41697  | 5.03566E-13 | 4791.93 | 15700.1 | 3.27636  |
|         | 7.52239E-09 | 4894.7  | 12494.9 | 2.55275  | 2.60607E-12 | 3098.7  | 11072.1 | 3.57313  |
| -2.0181 | 1.10649E-05 | 2299.65 | 980.725 | -2.34485 | 2.29641E-06 | 2571.9  | 1045.58 | -2.45979 |
|         |             |         |         |          | 0.0155258   | #DIV/0! | 1281.53 | #DIV/0!  |
|         | 0.000149661 | 911     | 356.733 | -2.55373 | 2.52047E-05 | 1613.3  | 580.5   | -2.77916 |
|         |             |         |         |          | 4.74015E-05 | 8131.08 | 4039.13 | -2.01308 |
|         | 0.000093447 | 2364.93 | 5067.1  | 2.1426   | 7.1663E-08  | 1852.87 | 5689.85 | 3.07084  |
|         |             |         |         |          | 4.21741E-07 | 1068.2  | 3858    | 3.61168  |
|         |             |         |         |          | 0.0129884   | 1145.75 | #DIV/0! | #DIV/0!  |
| 10.6374 | 6.10883E-05 | 569.75  | 1710.55 | 3.00228  | 5.35218E-05 | #DIV/0! | 2112.98 | #DIV/0!  |
| 8.64094 | 6.61377E-08 | #DIV/0! | 2564.63 | #DIV/0!  | 0.000169192 | #DIV/0! | 2583.7  | #DIV/0!  |
| #DIV/0! |             |         |         |          |             |         |         |          |
| #DIV/0! | 3.20036E-05 | 4587.13 | 2203.8  | -2.08146 |             |         |         |          |
|         |             |         |         |          | 0.00237393  | 1582.1  | 495.625 | -3.19213 |
|         |             |         |         |          | 4.5674E-11  | 21851.5 | 110218  | 5.04395  |
|         |             |         |         |          | 2.8861E-08  | 38432.4 | 98455.2 | 2.56178  |
|         | 0.0128696   | 1558.3  | 705.75  | -2.20801 |             |         |         |          |
|         | 7.39761E-07 | 1997.05 | 835.167 | -2.3912  | 4.15697E-09 | 3621.45 | 1102.9  | -3.28357 |
|         |             |         |         |          | 2.42907E-05 | #DIV/0! | 1065.73 | #DIV/0!  |
|         | 2.70278E-05 | 2098.18 | 637.375 | -3.2919  |             |         |         |          |
|         | 0.000420069 | 2735    | 1329.98 | -2.05643 | 4.15584E-05 | 4278.35 | 1876.38 | -2.28011 |
|         |             |         |         |          | 8.23015E-07 | 1800.78 | 630.1   | -2.85792 |
|         | 0.00026777  | 1247.75 | 549     | -2.27277 |             |         |         |          |
|         | 1.39082E-09 | 1243.93 | 449.15  | -2.76951 | 1.67626E-08 | 1535.57 | 671.8   | -2.28575 |
| -2.2765 | 4.79806E-05 | 1045.15 | 351.733 | -2.97143 |             |         |         |          |
|         |             |         |         |          | 3.19818E-08 | 1309.83 | 3048.25 | 2.3272   |
|         |             |         |         |          | 7.28121E-07 | 2291.43 | #DIV/0! | #DIV/0!  |
|         |             |         |         |          | 5.42262E-12 | 3736.68 | 11766.9 | 3.14904  |
|         | 6.72184E-05 | 1002.98 | 376.133 | -2.66654 |             |         |         |          |
| #DIV/0! | 1.29461E-08 | 503.5   | 1965.83 | 3.90432  | 2.96486E-10 | #DIV/0! | 3085.4  | #DIV/0!  |
| #DIV/0! | 3.84926E-09 | #DIV/0! | 3731.48 | #DIV/0!  | 9.54335E-09 | #DIV/0! | 5290.2  | #DIV/0!  |
| #DIV/0! | 6.36869E-13 | #DIV/0! | 2823.13 | #DIV/0!  | 3.96885E-13 | #DIV/0! | 4391    | #DIV/0!  |
|         | 2.68665E-06 | 1686.83 | 381.9   | -4.41693 | 1.93583E-05 | 2594.58 | 542.933 | -4.77881 |
|         |             |         |         |          | 0.0158268   | #DIV/0! | 1136.57 | #DIV/0!  |
|         | 0.0143471   | 812.9   | 210.75  | -3.85718 |             |         |         |          |
|         |             |         |         |          | 3.43816E-05 | 1909.95 | 599.325 | -3.18684 |

|         |             |         |         |          |             |         |         |          |
|---------|-------------|---------|---------|----------|-------------|---------|---------|----------|
|         |             |         |         |          | 0.00139493  | 1049.03 | 360.1   | -2.91317 |
| #DIV/0! |             |         |         |          | 5.75791E-05 | 2165.1  | 268.55  | -8.06219 |
| -6.1694 | 8.53988E-14 | 14664.2 | 849.025 | -17.2718 | 7.37873E-10 | 2839.78 | 404.8   | -7.01525 |
| -6.2621 | 6.05027E-07 | 3297.58 | #DIV/0! | #DIV/0!  | 2.16422E-07 | 2770.87 | #DIV/0! | #DIV/0!  |
| -2.009  | 1.40204E-08 | 2465.08 | 855.6   | -2.88111 | 0.000582844 | 1498.25 | 570.075 | -2.62816 |
|         | 3.52962E-05 | 2339.6  | #DIV/0! | #DIV/0!  | 0.000594665 | 5098.23 | #DIV/0! | #DIV/0!  |
|         | 7.69877E-07 | 5174.48 | 1281.45 | -4.03798 | 9.0863E-08  | 6524.73 | 1682.4  | -3.87822 |
| #DIV/0! | 9.79156E-05 | 2913.5  | #DIV/0! | #DIV/0!  | 7.1567E-08  | 3040.85 | 9504.13 | 3.12548  |
|         |             |         |         |          | 1.80903E-07 | 3583.33 | 11869.9 | 3.31254  |
| -3.8259 | 7.51221E-13 | 69551.8 | 16946.3 | -4.10425 | 2.90969E-10 | 45945.4 | 15945.6 | -2.88139 |
| -2.9371 | 4.14687E-08 | 49936.2 | 16966.7 | -2.94318 |             |         |         |          |
|         | 2.54867E-06 | 2336.38 | 1095.15 | -2.13338 |             |         |         |          |
|         | 4.99874E-06 | 1022.98 | 474.725 | -2.15488 | 8.43344E-12 | 1777.05 | 430.533 | -4.12755 |
|         |             |         |         |          | 5.67545E-05 | 3040.93 | 928.375 | -3.27554 |
|         | 0.000106401 | 2181.3  | 865.4   | -2.52057 |             |         |         |          |
|         | 0.000044105 | 1709.88 | 626.067 | -2.73114 |             |         |         |          |
|         | 0.00582332  | #DIV/0! | 752.15  | #DIV/0!  |             |         |         |          |
|         | 0.000379255 | 12514.9 | 25420.5 | 2.03122  |             |         |         |          |
|         | 8.45665E-06 | 9067.5  | 21906.4 | 2.41593  |             |         |         |          |
|         | 0.00465034  | 2386.9  | 5548.38 | 2.32451  |             |         |         |          |
|         | 4.61131E-08 | 4093.45 | 1275.28 | -3.20986 | 1.43396E-06 | 4679.05 | 1847.88 | -2.53212 |
|         |             |         |         |          | 0.0158733   | 957.9   | 323.5   | -2.96105 |
|         | 0.000417889 | 920.9   | 388.9   | -2.36796 |             |         |         |          |
|         |             |         |         |          | 0.0126961   | 1895.75 | 664.575 | -2.85257 |
| -2.3175 | 1.61817E-07 | 6535.23 | 2128.95 | -3.06969 | 2.02447E-08 | 7377.48 | 2306.65 | -3.19835 |
|         |             |         |         |          | 3.86572E-06 | 2194.93 | 651.267 | -3.37025 |
|         | 0.000666021 | 1769    | 881.933 | -2.00582 |             |         |         |          |
|         |             |         |         |          | 3.60621E-07 | #DIV/0! | 1844.25 | #DIV/0!  |
|         | 1.15209E-06 | 1487.38 | 674.1   | -2.20646 |             |         |         |          |
| -2.5124 | 3.65478E-12 | 1693.38 | 459.5   | -3.68526 |             |         |         |          |
| -3.3785 | 4.02679E-10 | 1714    | 431.5   | -3.97219 | 2.57058E-06 | 1693.75 | 720.7   | -2.35015 |
|         | 0.000052572 | 806.05  | 297.875 | -2.706   | 6.22299E-05 | 910.4   | 398.1   | -2.28686 |
|         |             |         |         |          | 0.0158907   | #DIV/0! | 573.6   | #DIV/0!  |
|         |             |         |         |          | 0.00167286  | 1539.1  | 443.9   | -3.46722 |
| -2.1639 | 2.19213E-06 | 2041.48 | 482.575 | -4.23038 | 2.57676E-07 | 2572.3  | 534.9   | -4.80894 |
| -3.2242 | 6.33922E-09 | 1959.58 | 351.95  | -5.56777 | 2.70237E-09 | 3572.03 | 636.675 | -5.61044 |
|         |             |         |         |          | 3.38523E-10 | 1609.25 | 6545.93 | 4.06769  |
|         |             |         |         |          | 2.34542E-07 | #DIV/0! | 2628.1  | #DIV/0!  |
|         |             |         |         |          | 1.06972E-05 | 2110.3  | 4368.8  | 2.07023  |
|         | 0.000233139 | 3763.78 | 7868.85 | 2.09068  | 2.68256E-06 | 2476.3  | 5163.83 | 2.0853   |
|         |             |         |         |          | 0.00297169  | 2493.18 | 5728.08 | 2.2975   |
|         |             |         |         |          | 1.38301E-11 | 2552.9  | 8874.18 | 3.47612  |
| -2.1233 | 5.67312E-05 | 10304.9 | 21966.4 | 2.13165  | 6.18661E-11 | 4118.23 | 15701   | 3.81256  |
|         | 3.1772E-08  | 3320.53 | 1292.28 | -2.56952 |             |         |         |          |
|         | 0.00261356  | 554.575 | 224.55  | -2.46972 |             |         |         |          |
| #DIV/0! | 1.03749E-07 | 789.9   | 1998.2  | 2.52969  | 4.33344E-07 | #DIV/0! | 3175.68 | #DIV/0!  |
| #DIV/0! | 0.0011004   | 336.05  | 1144.03 | 3.40433  |             |         |         |          |
| 4.74069 | 3.4287E-10  | 1012.3  | 3517.93 | 3.47518  | 1.47767E-12 | 1121.85 | 7986.38 | 7.11893  |
| 10.0188 | 2.70246E-15 | 702.633 | 8675.2  | 12.3467  | 2.43602E-16 | 1126.5  | 16937.3 | 15.0353  |
| 10.9281 | 2.61985E-16 | 887.1   | 13588.8 | 15.3182  | 1.45046E-16 | 1819.25 | 28045   | 15.4157  |
| -2.098  | 1.13318E-06 | 4997.95 | 1866.1  | -2.67829 |             |         |         |          |
| -3.1348 | 7.02178E-05 | 1397.3  | 362.7   | -3.8525  |             |         |         |          |
|         |             |         |         |          | 5.41934E-05 | 1372.57 | 589.267 | -2.32928 |
|         | 2.3456E-08  | 12374.1 | 26253.6 | 2.12167  | 5.47483E-15 | 6625.4  | 23460   | 3.54092  |
|         | 8.38916E-06 | 4900.98 | 10454.9 | 2.13322  | 4.04272E-10 | 2524.5  | 8773.28 | 3.47525  |
|         | 1.51303E-09 | 8859.53 | 22074.4 | 2.4916   | 7.48735E-16 | 4127.23 | 19236.2 | 4.6608   |
|         | 8.71114E-09 | 10870.6 | 23287.3 | 2.14223  | 1.09538E-15 | 5611.5  | 21638.3 | 3.85606  |



|         |             |         |         |          |             |         |         |          |
|---------|-------------|---------|---------|----------|-------------|---------|---------|----------|
|         | 9.61032E-05 | 1141.05 | 390.025 | -2.92558 |             |         |         |          |
|         | 5.24336E-06 | 821.775 | 307.25  | -2.67461 | 1.16332E-07 | 1857.38 | 521.567 | -3.56115 |
|         |             |         |         |          | 1.85539E-05 | 853.675 | #DIV/0! | #DIV/0!  |
|         | 3.3166E-06  | 1914.88 | 727.025 | -2.63385 | 1.84008E-09 | 3992.03 | 886.675 | -4.50224 |
| 4.13881 | 2.42035E-11 | 991.4   | 3886.8  | 3.92052  | 2.16368E-07 | 1768.13 | 4109.6  | 2.32427  |
| 2.54705 | 1.73904E-06 | 1788.98 | 4046.4  | 2.26185  | 5.14448E-09 | 2211.83 | 6995.2  | 3.16264  |
| -2.1045 |             |         |         |          |             |         |         |          |
| -2.8986 | 3.43414E-06 | 1426.08 | 601.467 | -2.371   |             |         |         |          |
|         |             |         |         |          | 0.00247646  | #DIV/0! | 1424.23 | #DIV/0!  |
| -2.3636 | 1.61187E-07 | 5830.4  | 2167.75 | -2.68961 |             |         |         |          |
| -2.1689 | 8.98779E-07 | 11501.7 | 3906.78 | -2.94405 |             |         |         |          |
|         | 0.000121791 | 2701.18 | 1135.33 | -2.37921 |             |         |         |          |
|         |             |         |         |          | 6.24184E-07 | 7694.9  | 16016.3 | 2.08141  |
|         |             |         |         |          | 4.41466E-07 | 1821.43 | 4305.08 | 2.36358  |
|         |             |         |         |          | 0.00695509  | 952     | 317.2   | -3.00126 |
|         | 0.000687962 | 10666   | 22631.9 | 2.12186  | 3.37127E-05 | 3670.13 | 10354.4 | 2.82126  |
|         | 6.03486E-05 | 30358.9 | 66519.5 | 2.19111  | 3.02561E-09 | 17999.2 | 55768.6 | 3.0984   |
|         | 7.40757E-16 | 3177.45 | 13668.6 | 4.30175  | 4.7954E-20  | 1908.08 | 13196   | 6.91584  |
| -2.1596 | 1.99464E-07 | 2153.43 | 1071.93 | -2.00893 | 2.01038E-09 | 2800.03 | 1162.8  | -2.40801 |
|         |             |         |         |          | 1.10008E-10 | 4199.05 | 15283.1 | 3.63966  |
|         |             |         |         |          | 0.000109981 | 1208.2  | 477.475 | -2.53039 |
|         |             |         |         |          | 1.02371E-05 | 1181.23 | 503.85  | -2.3444  |
|         | 7.13932E-09 | 830.175 | 258.4   | -3.21275 |             |         |         |          |
| #DIV/0! | 0.00406322  | #DIV/0! | 694.367 | #DIV/0!  |             |         |         |          |
|         | 1.28587E-08 | 1625.9  | 602.033 | -2.70068 | 1.46388E-06 | 1824.2  | 800     | -2.28025 |
|         | 0.000168653 | 2999.75 | 1362.8  | -2.20117 | 0.000435008 | 3742.55 | 1828.68 | -2.04659 |
|         | 0.00148186  | 745.15  | 1870.7  | 2.5105   | 0.000021232 | 779.5   | 2711.7  | 3.47877  |
|         | 0.00784459  | 806.4   | 3028.15 | 3.75515  | 5.10343E-07 | 860.7   | 4830.35 | 5.61212  |
|         | 0.00227914  | 1710.68 | 4535.3  | 2.65118  | 8.40669E-08 | #DIV/0! | 7218.45 | #DIV/0!  |
|         | 2.6736E-07  | 10235.1 | 3969.08 | -2.57871 |             |         |         |          |
|         | 0.0043986   | 692.733 | 1569.9  | 2.26624  |             |         |         |          |
|         | 8.73017E-06 | 5953.53 | 13585.6 | 2.28194  |             |         |         |          |
|         | 6.55975E-06 | #DIV/0! | 4894.58 | #DIV/0!  |             |         |         |          |
|         | 0.00537163  | 678.975 | 234.033 | -2.90119 | 0.00049582  | 1268.4  | 416.133 | -3.04806 |
|         | 0.000996354 | 612.9   | 156.65  | -3.91254 | 0.0111245   | 1147.88 | 417.3   | -2.75072 |
|         | 0.000129462 | 2245.98 | 650.85  | -3.45083 | 5.14886E-05 | 4889.1  | 1431.78 | -3.41471 |
|         |             |         |         |          | 0.00835475  | 979.667 | 423.725 | -2.31203 |
| -2.0006 |             |         |         |          |             |         |         |          |
| -2.6745 |             |         |         |          | 4.98881E-09 | 3806.93 | 1028.35 | -3.70197 |
|         |             |         |         |          | 2.61998E-14 | 5566.43 | 18692.9 | 3.35815  |
|         | 0.000317282 | 604     | #DIV/0! | #DIV/0!  |             |         |         |          |
| #DIV/0! | 6.25263E-06 | #DIV/0! | 2016.68 | #DIV/0!  | 0.00802774  | #DIV/0! | 2709.55 | #DIV/0!  |
|         |             |         |         |          | 0.000579088 | 2473.6  | 983.25  | -2.51574 |
|         |             |         |         |          | 4.85404E-05 | 2332.28 | 1131.55 | -2.06113 |
|         |             |         |         |          | 1.10959E-05 | 624.233 | 307.133 | -2.03245 |
| 2.36661 | 0.000097229 | 1296.8  | #DIV/0! | #DIV/0!  |             |         |         |          |
|         |             |         |         |          | 0.000203898 | 769.633 | 118.9   | -6.47295 |
|         | 0.000367157 | 1155.23 | 348.725 | -3.31271 | 5.1502E-06  | 3713.68 | 786.725 | -4.72042 |
|         | 0.000106041 | 1053.88 | 388.625 | -2.7118  | 0.000830947 | 1396.58 | 563.925 | -2.47653 |
|         | 6.60511E-05 | 3516    | 1312.6  | -2.67865 | 3.99332E-06 | 7979.03 | 2409.78 | -3.31111 |
|         | 0.000273613 | 625.5   | 235.175 | -2.65972 | 0.000218917 | 1166.53 | 374.4   | -3.11574 |
|         |             |         |         |          | 1.95943E-15 | 4812.88 | 16720.3 | 3.47407  |
|         | 0.000126151 | 1020.4  | 306.8   | -3.32595 | 2.37898E-05 | 2177.98 | 587.225 | -3.70893 |
|         |             |         |         |          | 3.09174E-05 | 1475.78 | 484.35  | -3.04692 |
|         |             |         |         |          | 3.19877E-05 | 1226.85 | 431.625 | -2.8424  |
|         |             |         |         |          | 2.57184E-06 | 1673.3  | 605.85  | -2.7619  |
|         |             |         |         |          | 8.85605E-06 | 1492.83 | 691.35  | -2.15929 |
|         |             |         |         |          | 0.0139308   | 1236.83 | 596.225 | -2.07443 |
|         | 0.000696265 | 874.1   | 327.367 | -2.67009 | 3.53324E-05 | 1410.33 | 656.1   | -2.14956 |
|         |             |         |         |          | 1.0124E-07  | 1215.18 | 578.5   | -2.10056 |
|         |             |         |         |          | 0.0220268   | 1267.73 | 339.025 | -3.73935 |
|         | 3.17913E-05 | 13240.9 | 34822.3 | 2.62992  | 4.15705E-06 | 4501.18 | 14540.4 | 3.23035  |

|         |             |         |         |          |             |         |         |          |  |
|---------|-------------|---------|---------|----------|-------------|---------|---------|----------|--|
|         | 0.000290964 | 17497.1 | 36348.3 | 2.07739  |             |         |         |          |  |
|         |             |         |         |          | 0.000315067 | 1405.93 | 520.2   | -2.70268 |  |
|         |             |         |         |          | 0.00697101  | #DIV/0! | 2843.83 | #DIV/0!  |  |
|         | 6.16996E-06 | 915.95  | 309.1   | -2.96328 | 0.00040457  | 1396.45 | 668.067 | -2.09029 |  |
|         |             |         |         |          | 0.000413287 | #DIV/0! | 1467.48 | #DIV/0!  |  |
|         |             |         |         |          | 7.34823E-06 | 6222.48 | 1303    | -4.7755  |  |
|         |             |         |         |          | 0.000106123 | 1196.58 | 345.2   | -3.46632 |  |
|         |             |         |         |          | 2.71454E-16 | 32976.7 | 108296  | 3.28402  |  |
| 3.34272 |             |         |         |          |             |         |         |          |  |
|         | 0.0153377   | 897.275 | 401.8   | -2.23314 | 2.49835E-05 | 1683.45 | 569.033 | -2.95844 |  |
|         |             |         |         |          | 0.000143597 | 2184.33 | 574.7   | -3.80081 |  |
|         | 0.00349971  | 702.967 | 233.9   | -3.00542 |             |         |         |          |  |
|         | 0.00104462  | 1111.5  | 2362.08 | 2.12512  | 7.45162E-06 | #DIV/0! | 1756.63 | #DIV/0!  |  |
|         |             |         |         |          | 3.51127E-06 | #DIV/0! | 2515.58 | #DIV/0!  |  |
|         |             |         |         |          | 2.65021E-08 | 4661.98 | 11089.4 | 2.37869  |  |
|         | 2.49328E-05 | 1459.28 | 3345.43 | 2.29253  |             |         |         |          |  |
|         |             |         |         |          | 0.00292055  | 1884.47 | 497.6   | -3.78711 |  |
|         | 1.41347E-05 | 3680.23 | 10902.5 | 2.96245  | 7.8726E-15  | 958.2   | 12202.2 | 12.7345  |  |
|         |             |         |         |          | 0.00516055  | 664.733 | 202.4   | -3.28426 |  |
|         | 0.00182013  | 529.9   | 255.55  | -2.07357 | 3.31181E-05 | 1071.88 | 379.267 | -2.82618 |  |
|         | 1.35753E-06 | 1194.83 | 380.6   | -3.13932 |             |         |         |          |  |
|         |             |         |         |          | 3.58726E-05 | 1465.23 | 666.1   | -2.19971 |  |
| 11.2384 | 3.42483E-08 | 851.8   | 12441.9 | 14.6065  | 6.5595E-11  | #DIV/0! | 26476.9 | #DIV/0!  |  |
| 7.14484 | 2.24526E-08 | #DIV/0! | 13459.1 | #DIV/0!  | 6.57367E-15 | #DIV/0! | 28784.9 | #DIV/0!  |  |
|         | 4.28118E-06 | 1198.73 | 555     | -2.15986 |             |         |         |          |  |
|         |             |         |         |          | 2.06024E-06 | 1223.9  | 505.9   | -2.41925 |  |
|         |             |         |         |          | 4.04641E-06 | 2636.73 | 6836.18 | 2.59268  |  |
| 2.10225 | 5.6246E-09  | 2375.7  | 7393.98 | 3.11234  | 2.15831E-10 | #DIV/0! | 7237.73 | #DIV/0!  |  |
|         |             |         |         |          | 8.18738E-05 | #DIV/0! | 2789.35 | #DIV/0!  |  |
| 2.1513  |             |         |         |          |             |         |         |          |  |
|         | 0.0001941   | 1010.3  | 300.733 | -3.35945 | 0.00241889  | 1783.17 | 448.15  | -3.97895 |  |
| -2.6648 | 8.60924E-09 | 1430.65 | 430.775 | -3.32111 | 6.67033E-07 | 1827.8  | 740.425 | -2.46858 |  |
|         |             |         |         |          | 2.76752E-06 | 2376.1  | 577.7   | -4.11303 |  |
|         |             |         |         |          | 2.36538E-05 | 645.9   | 249.1   | -2.59293 |  |
|         |             |         |         |          | 6.34597E-05 | 2078.55 | 787.025 | -2.64102 |  |
|         |             |         |         |          | 7.44092E-05 | 1709.27 | 660.4   | -2.58823 |  |
|         |             |         |         |          | 6.79537E-07 | 5000.35 | 2010.7  | -2.48687 |  |
| -2.0191 | 1.65189E-06 | 7247.6  | 3306.98 | -2.19161 | 1.30712E-06 | 6840.35 | 3289.23 | -2.07962 |  |
|         | 9.94432E-07 | 1109.95 | 434.767 | -2.55298 | 3.34459E-06 | 1749.7  | 855.85  | -2.0444  |  |
|         |             |         |         |          | 0.00136205  | 1055.9  | 526.375 | -2.00598 |  |
|         | 4.28617E-10 | 1021.08 | 313.533 | -3.25667 |             |         |         |          |  |
| -2.1259 |             |         |         |          |             |         |         |          |  |
|         | 9.91579E-06 | 12407.8 | 5923.23 | -2.09478 |             |         |         |          |  |
|         |             |         |         |          | 0.000351336 | 1335.28 | 611.275 | -2.18441 |  |
|         | 4.70754E-08 | 2043.93 | 15777.7 | 7.7193   | 7.76748E-07 | 2829.5  | 6814.03 | 2.40821  |  |
| 4.35648 | 6.06502E-06 | 1225    | 13806.1 | 11.2703  | 7.55332E-08 | 2191.3  | 5982.58 | 2.73015  |  |
| 2.8256  | 1.69079E-08 | 4747.7  | 33107.3 | 6.97333  | 8.86821E-09 | 3703.97 | 16858.8 | 4.55155  |  |
| 2.87618 | 1.27198E-08 | #DIV/0! | 2376.93 | #DIV/0!  | 1.58286E-10 | #DIV/0! | 1677.35 | #DIV/0!  |  |
| 2.39029 |             |         |         |          |             |         |         |          |  |
|         |             |         |         |          | 2.03671E-08 | 3441.15 | 322.967 | -10.6548 |  |
|         | 9.83944E-11 | 20809.8 | 49256.2 | 2.36697  | 1.08989E-15 | 11323.4 | 41741.2 | 3.68628  |  |
|         | 9.11136E-11 | 26791.6 | 64878.1 | 2.42159  | 3.51769E-16 | 15720.9 | 62533.3 | 3.97771  |  |
|         |             |         |         |          | 0.00422373  | 1006.67 | 438.2   | -2.29728 |  |
|         |             |         |         |          | 7.90471E-09 | 21146   | 47974.4 | 2.26873  |  |
|         | 0.00468914  | 2214.85 | 5512.8  | 2.48902  | 6.77528E-08 | 1773.5  | 13575.6 | 7.65468  |  |
|         |             |         |         |          | 7.67142E-09 | 5241.23 | 19567.4 | 3.73335  |  |
|         |             |         |         |          | 3.3248E-13  | 5625.28 | 23980.5 | 4.26298  |  |
|         |             |         |         |          | 4.55411E-08 | 45452.9 | 101545  | 2.23407  |  |
| -2.5684 |             |         |         |          |             |         |         |          |  |
|         |             |         |         |          | 0.000220914 | #DIV/0! | 749.2   | #DIV/0!  |  |
|         | 1.94334E-06 | 8246.2  | 19564   | 2.37248  | 0.000000156 | 3846.38 | 11878.2 | 3.08815  |  |

|         |             |         |         |          |             |         |         |          |
|---------|-------------|---------|---------|----------|-------------|---------|---------|----------|
|         |             |         |         |          | 4.01887E-07 | 5981.9  | 1314.2  | -4.55174 |
|         |             |         |         |          | 0.000234188 | 6370.13 | #DIV/0! | #DIV/0!  |
|         | 0.00594243  | 1092.45 | 362.833 | -3.01089 | 0.0194335   | 2118.25 | 453.4   | -4.67192 |
|         |             |         |         |          | 0.000186917 | 1873.68 | 469.1   | -3.99419 |
|         | 0.00545926  | 923.2   | 317.05  | -2.91184 | 0.00156452  | 2030.83 | 424.45  | -4.78462 |
| 3.1203  | 4.37019E-05 | 494.2   | 1428.85 | 2.89124  | 5.03696E-08 | #DIV/0! | 2439.95 | #DIV/0!  |
|         |             |         |         |          | 2.67492E-08 | 5281.88 | 2629.93 | -2.00837 |
| -2.3408 |             |         |         |          |             |         |         |          |
| 3.18673 | 1.12023E-17 | 1956.08 | 12478.5 | 6.37933  | 1.83271E-17 | 2054.53 | 10592   | 5.1554   |
|         | 0.00647332  | #DIV/0! | 882.6   | #DIV/0!  | 2.49652E-06 | #DIV/0! | 1090.18 | #DIV/0!  |
| -2.9001 | 1.29992E-06 | 2943.58 | 1254.23 | -2.34691 |             |         |         |          |
|         | 0.000117795 | 706.633 | #DIV/0! | #DIV/0!  |             |         |         |          |
| #DIV/0! | 1.24295E-13 | #DIV/0! | 7731.85 | #DIV/0!  | 4.38946E-14 | #DIV/0! | 11554   | #DIV/0!  |
|         |             |         |         |          | 1.19614E-07 | 1909.5  | 4275.48 | 2.23905  |
|         |             |         |         |          | 3.6304E-11  | 10683.5 | 27659.6 | 2.58901  |
| -2.1284 |             |         |         |          |             |         |         |          |
|         |             |         |         |          | 0.00068168  | 1251.7  | 454.1   | -2.75644 |
|         |             |         |         |          | 0.0168132   | 1328.88 | #DIV/0! | #DIV/0!  |
|         |             |         |         |          | 0.00165446  | 1196.87 | #DIV/0! | #DIV/0!  |
|         |             |         |         |          | 0.000252144 | 4108.5  | 1000.13 | -4.10799 |
|         |             |         |         |          | 0.00702155  | 1193.48 | 433.8   | -2.75121 |
|         | 0.00316945  | 1179    | 303.275 | -3.88756 | 0.000567538 | 2769.35 | 582.925 | -4.75078 |
|         |             |         |         |          | 0.000521477 | 4607.63 | 1562.3  | -2.94926 |
| -2.0242 |             |         |         |          | 4.83537E-06 | #DIV/0! | 1545.93 | #DIV/0!  |
| #DIV/0! | 7.95543E-06 | 1595.2  | 790.3   | -2.01847 |             |         |         |          |
| -2.1483 |             |         |         |          |             |         |         |          |
|         | 9.52116E-06 | 1063.65 | 2294.5  | 2.15719  | 1.04113E-08 | 940.667 | 2349.9  | 2.49812  |
|         | 3.32703E-05 | 4982.95 | 11505.9 | 2.30905  | 7.09042E-07 | 3076.7  | 9508.2  | 3.09039  |
|         | 4.20737E-12 | 6032.55 | 16313.8 | 2.7043   | 6.86647E-15 | 3315.53 | 10753.9 | 3.24348  |
|         | 0.000466903 | 533     | 1100.98 | 2.06562  |             |         |         |          |
| -6.0047 | 9.36288E-12 | 17610.9 | 1599.68 | -11.009  | 2.8597E-13  | 12129.6 | 941.925 | -12.8774 |
| -7.1637 | 5.56583E-11 | 34439.4 | 1818.13 | -18.9423 |             |         |         |          |
|         | 7.08243E-07 | 22651.2 | 54195.3 | 2.39261  |             |         |         |          |
|         | 0.0134663   | 504.1   | #DIV/0! | #DIV/0!  | 1.59185E-08 | 1272.27 | #DIV/0! | #DIV/0!  |
|         | 0.0015774   | 744.933 | #DIV/0! | #DIV/0!  |             |         |         |          |
|         |             |         |         |          |             |         |         |          |
|         |             |         |         |          | 1.22972E-05 | 2743.2  | 537.75  | -5.10126 |
|         | 0.00041514  | 1080.03 | #DIV/0! | #DIV/0!  | 0.000611753 | 2435.67 | 532.367 | -4.57517 |
|         |             |         |         |          | 0.00380716  | 1325.1  | #DIV/0! | #DIV/0!  |
|         |             |         |         |          | 8.08202E-07 | 2838.08 | 6037.68 | 2.12738  |
| 3.4862  | 1.27261E-16 | 3175.05 | 13706   | 4.31679  | 5.89964E-15 | 3489.5  | 12146.8 | 3.48096  |
| 3.88045 | 3.70587E-07 | 675.425 | 3604.53 | 5.33668  | 7.01857E-07 | 584.2   | 2478.93 | 4.24328  |
| 2.21618 | 8.24248E-13 | 3739.9  | 13444.5 | 3.59488  | 7.51011E-15 | #DIV/0! | 13539.2 | #DIV/0!  |
|         | 2.78192E-05 | 9331.13 | 4248.05 | -2.19657 | 7.8242E-07  | 6909.1  | 2935    | -2.35404 |
| #DIV/0! | 0.00184043  | #DIV/0! | 1309.43 | #DIV/0!  | 2.03689E-05 | #DIV/0! | 2125.93 | #DIV/0!  |
|         |             |         |         |          | 0.00090501  | 2601.33 | 909.925 | -2.85883 |
|         |             |         |         |          | 0.000339844 | 1887.1  | 796.9   | -2.36805 |
|         |             |         |         |          | 0.00789561  | 1512.95 | 541.5   | -2.794   |
|         |             |         |         |          | 0.000421191 | 1035    | 390.6   | -2.64977 |
|         |             |         |         |          | 5.8371E-08  | #DIV/0! | 2800.55 | #DIV/0!  |
|         | 1.23793E-05 | 19963.1 | 7690.28 | -2.59589 | 1.61064E-09 | 42308   | 11241.7 | -3.76348 |
|         | 0.000834565 | 9298    | 4297.45 | -2.16361 | 3.75393E-07 | 19838.1 | 6998.08 | -2.83479 |
|         | 0.000454626 | 10166.5 | 4406.48 | -2.30717 | 9.79418E-07 | 20905   | 7495.18 | -2.78912 |
|         | 5.01406E-08 | 28069.3 | 8922.7  | -3.14583 | 8.31242E-12 | 51598.1 | 12349   | -4.17831 |
|         | 0.00666103  | 619.75  | 113.6   | -5.45555 |             |         |         |          |
|         |             |         |         |          | 0.000255424 | 1407.95 | 3588.73 | 2.5489   |
| 2.24022 |             |         |         |          |             |         |         |          |
|         |             |         |         |          | 2.83002E-09 | 2167.03 | 4992.18 | 2.30369  |
|         |             |         |         |          | 1.60799E-12 | 2973.63 | 8066.1  | 2.71255  |
|         |             |         |         |          | 5.87576E-05 | #DIV/0! | 6272.48 | #DIV/0!  |
|         | 0.000002573 | 1205.9  | 479.45  | -2.51517 | 2.55594E-07 | 1365.1  | 455.25  | -2.99857 |
|         |             |         |         |          | 2.27078E-10 | 3273.18 | 698.625 | -4.68517 |
|         |             |         |         |          | 1.81598E-13 | 3239.75 | 8834.95 | 2.72705  |

|         |             |         |         |          |             |         |         |          |
|---------|-------------|---------|---------|----------|-------------|---------|---------|----------|
|         |             |         |         |          | 0.000851922 | #DIV/0! | 1417.7  | #DIV/0!  |
| -3.1345 |             |         |         |          |             |         |         |          |
|         | 0.000176921 | 2092.83 | 654.625 | -3.19698 | 1.38256E-05 | 5330.7  | 1092.95 | -4.87735 |
|         | 0.000547557 | 817.05  | 275.875 | -2.96167 | 0.00218074  | 1278.48 | 453.3   | -2.82037 |
|         |             |         |         |          | 0.00256461  | 1756.13 | 742     | -2.36676 |
|         |             |         |         |          | 0.0212958   | 2492.13 | #DIV/0! | #DIV/0!  |
|         |             |         |         |          | 0.000452148 | 1309.63 | 550     | -2.38115 |
| 2.05642 | 3.98412E-05 | 1193.95 | 3620.6  | 3.03246  |             |         |         |          |
|         | 0.00520935  | 886.55  | 342.7   | -2.58696 | 0.00562356  | 1517.4  | 578.75  | -2.62186 |
|         | 0.00193794  | 1356.97 | 530.2   | -2.55935 |             |         |         |          |
|         | 0.00124697  | 1212.3  | 536.9   | -2.25796 |             |         |         |          |
|         |             |         |         |          | 1.29485E-05 | 2390.63 | 892.875 | -2.67745 |
|         |             |         |         |          | 0.000365242 | 1937.48 | 794.1   | -2.43984 |
|         |             |         |         |          | 0.00175599  | 1174.07 | #DIV/0! | #DIV/0!  |
|         |             |         |         |          | 6.57969E-06 | 2411    | 498.225 | -4.83918 |
|         |             |         |         |          | 1.93177E-06 | 1315.08 | 436.275 | -3.01433 |
|         |             |         |         |          | 9.71276E-06 | 2033.57 | 925.9   | -2.19631 |
|         |             |         |         |          | 0.00199639  | 1709.3  | 764.65  | -2.2354  |
|         | 0.000426492 | 6279.95 | 1408.75 | -4.45782 | 2.88313E-07 | 5031.28 | 457.367 | -11.0005 |
|         | 0.00321127  | 555.767 | #DIV/0! | #DIV/0!  | 8.65555E-05 | 1520.9  | 386.85  | -3.9315  |
|         |             |         |         |          | 0.0166995   | #DIV/0! | 759.567 | #DIV/0!  |
|         |             |         |         |          | 1.08247E-07 | #DIV/0! | 7388.2  | #DIV/0!  |
|         |             |         |         |          | 3.41802E-05 | 5782.7  | 11810.7 | 2.04242  |
|         |             |         |         |          | 1.26694E-06 | 3347.83 | 9218.78 | 2.75366  |
|         |             |         |         |          | 0.000451556 | #DIV/0! | 1150.48 | #DIV/0!  |
|         |             |         |         |          | 0.00641956  | 810.95  | 254.15  | -3.19083 |
|         |             |         |         |          | 0.00412026  | 1923.38 | 846.9   | -2.27108 |
|         |             |         |         |          | 7.7095E-07  | 5388    | 2210.75 | -2.43718 |
|         | 0.00158253  | 584.567 | #DIV/0! | #DIV/0!  |             |         |         |          |
|         |             |         |         |          | 0.00181508  | 3516.45 | 977.133 | -3.59874 |
| 2.9301  | 4.1483E-07  | 384.2   | 1658.4  | 4.3165   | 0.000224474 | #DIV/0! | 1295.73 | #DIV/0!  |
| 2.29644 |             |         |         |          | 0.00161506  | #DIV/0! | 1473.6  | #DIV/0!  |
|         |             |         |         |          | 0.00144726  | 1991.3  | 605.733 | -3.28742 |
| -4.615  | 1.43799E-07 | 6982.6  | 1345.05 | -5.19133 | 2.9268E-09  | 5928.18 | 1061.75 | -5.5834  |
|         |             |         |         |          | 0.0093816   | 2263.33 | 614.867 | -3.681   |
|         |             |         |         |          | 1.63705E-06 | 3712.55 | 770.5   | -4.81836 |
|         | 8.51771E-06 | 1886.53 | 684.175 | -2.75737 | 4.91334E-06 | 4229.95 | 1397.68 | -3.02642 |
|         |             |         |         |          | 0.000376343 | 1687.37 | 388.4   | -4.3444  |
| -2.3301 | 2.37408E-06 | 1755.33 | 520.4   | -3.37305 |             |         |         |          |
|         |             |         |         |          | 0.00897924  | 1499.7  | 698.633 | -2.14662 |
|         |             |         |         |          | 5.89601E-05 | 2043.25 | 967.25  | -2.11243 |
|         |             |         |         |          | 0.000203501 | 738.033 | 295.45  | -2.498   |
|         |             |         |         |          | 8.18423E-05 | 3339.05 | 976.475 | -3.41949 |
|         |             |         |         |          | 8.25393E-09 | 2072.53 | 5216.88 | 2.51716  |
| 2.47514 | 1.38519E-08 | 4103.28 | 10209.8 | 2.48821  | 1.67167E-12 | 2261.43 | 8175.1  | 3.61501  |
|         |             |         |         |          | 0.000018662 | 802.267 | 357.2   | -2.24599 |
|         | 0.000513492 | 2435.45 | 4979.38 | 2.04454  |             |         |         |          |
|         |             |         |         |          | 1.18902E-06 | 858.233 | 335.5   | -2.55807 |
|         | 0.000107843 | 811.4   | 119.8   | -6.77295 |             |         |         |          |
|         | 0.000789148 | 6422.88 | 3102.23 | -2.07041 |             |         |         |          |
|         | 0.00274934  | 914.633 | 366.7   | -2.49423 | 5.05913E-05 | 3370.5  | 660.6   | -5.10218 |
|         |             |         |         |          | 0.00644209  | 1460.95 | 453.733 | -3.21984 |
|         | 0.00122347  | 842.6   | #DIV/0! | #DIV/0!  |             |         |         |          |
|         |             |         |         |          | 0.0152309   | 1420.93 | 544.35  | -2.61033 |
|         |             |         |         |          | 1.10215E-06 | 3502.8  | 1295.95 | -2.70288 |
|         | 4.03646E-06 | 2529.55 | 1141.15 | -2.21667 | 3.56841E-10 | 3811.53 | 1101.15 | -3.46141 |
|         | 0.00374027  | 648.4   | 175.1   | -3.70303 | 0.00211693  | 1412.08 | 572.5   | -2.46651 |
| 3.25634 | 3.85831E-14 | 2579.8  | 16835.1 | 6.52573  | 4.21494E-15 | 2005.95 | 10055.1 | 5.01265  |
| 3.53699 | 7.70855E-13 | 2315.4  | 17409   | 7.51878  | 1.75776E-12 | 1756.03 | 9787.13 | 5.57343  |
| 2.73403 | 8.0537E-13  | 5008.75 | 30981.4 | 6.18545  | 7.58415E-16 | 3059.4  | 19322.1 | 6.31565  |
| 2.98652 | 5.91288E-14 | 7044.1  | 30732.8 | 4.36291  | 2.26906E-17 | 3013.1  | 21992   | 7.29878  |
|         |             |         |         |          | 0.0123444   | 3400.4  | 727.45  | -4.67441 |





|         |             |         |         |          |             |         |         |          |
|---------|-------------|---------|---------|----------|-------------|---------|---------|----------|
|         |             |         |         |          | 0.00190251  | 3154.6  | 729.367 | -4.32512 |
|         |             |         |         |          | 0.000532983 | 7683.88 | 1840.53 | -4.17483 |
|         | 7.97822E-05 | 895.325 | 260.3   | -3.43959 | 0.00242237  | 1600.63 | 553.75  | -2.89052 |
|         | 0.000432578 | 1855.93 | 546.65  | -3.39509 | 3.52698E-05 | 4222.55 | 1045.88 | -4.03734 |
|         | 0.00135585  | 971.125 | 2368.15 | 2.43856  | 5.48058E-09 | 909.9   | 2506.08 | 2.75423  |
| 6.11956 |             |         |         |          | 6.13539E-05 | #DIV/0! | 2326.93 | #DIV/0!  |
|         | 1.13267E-12 | 6074.68 | 97764.3 | 16.0937  | 1.10923E-13 | 9784.85 | 137731  | 14.0759  |
|         |             |         |         |          | 0.016314    | 947.475 | 302.333 | -3.13388 |
|         | 0.00342161  | 2976.33 | 1035.1  | -2.8754  | 0.0050534   | 5383.7  | 2342.83 | -2.29795 |
|         |             |         |         |          | 7.6506E-07  | 2044.83 | 894.7   | -2.28549 |
|         |             |         |         |          | 0.00761025  | 1034.58 | 456.75  | -2.26508 |
|         | 8.37206E-12 | 8698.05 | 19806.7 | 2.27714  | 5.6203E-17  | 5192.98 | 16446.4 | 3.16704  |
|         | 1.55608E-07 | 1207.85 | 3522    | 2.91592  | 3.65646E-12 | 988.7   | 3277.43 | 3.31488  |
|         | 1.31273E-10 | 3205.28 | 10553.7 | 3.29261  | 4.79965E-12 | 2579.5  | 9196.23 | 3.56512  |
| -3.508  | 2.74569E-14 | 5886.85 | 1222.63 | -4.81489 | 9.42784E-13 | 2960.8  | 864.5   | -3.42487 |
| -2.1728 |             |         |         |          | 0.000299624 | #DIV/0! | 2155.25 | #DIV/0!  |
|         |             |         |         |          |             |         |         |          |
|         | 0.00116788  | 3476.35 | 1486.93 | -2.33793 | 5.13591E-12 | 36071.3 | 100883  | 2.79676  |
|         |             |         |         |          | 2.8881E-06  | 3200.9  | 8481.08 | 2.64959  |
|         | 0.000956813 | 6192.73 | 15016.7 | 2.42489  | 8.61658E-10 | 2112.6  | 8569.98 | 4.0566   |
|         |             |         |         |          | 6.31877E-10 | 5209.9  | 25122.1 | 4.822    |
|         |             |         |         |          | 6.18181E-18 | 15535.8 | 83662.2 | 5.38512  |
| -2.3942 | 0.0147502   | 684.7   | #DIV/0! | #DIV/0!  | 0.0100185   | 1125    | 276.2   | -4.07314 |
|         |             |         |         |          |             |         |         |          |
|         |             |         |         |          | 0.0033832   | 985.05  | 213     | -4.62465 |
|         |             |         |         |          | 0.000598893 | 1112.73 | 341.6   | -3.25739 |
|         |             |         |         |          | 0.0219875   | 1437.75 | 475.65  | -3.02271 |
|         |             |         |         |          | 0.00445794  | 2640.35 | 573.767 | -4.60178 |
|         |             |         |         |          | 0.000563077 | 5663.68 | 2011    | -2.81635 |
|         |             |         |         |          | 0.00996406  | 511.4   | 209.6   | -2.43989 |
|         | 0.00318142  | 734.833 | 318.7   | -2.30572 |             |         |         |          |
|         |             |         |         |          | 0.000997112 | 10003.1 | 1596.05 | -6.26743 |
|         |             |         |         |          | 0.00170664  | 636.267 | #DIV/0! | #DIV/0!  |
| 4.54585 | 1.13734E-11 | 6684.38 | 44460.2 | 6.65137  | 3.89592E-13 | 5815.8  | 45636.7 | 7.84702  |
| 3.5879  | 5.26893E-12 | 12049.9 | 62525.6 | 5.18891  | 2.79416E-16 | 8142.28 | 73376.6 | 9.01181  |
| 5.61673 | 2.35579E-14 | 4162.73 | 39347.7 | 9.4524   | 1.20071E-14 | 4464.3  | 40377.3 | 9.04449  |
|         | 0.00386904  | #DIV/0! | 556.167 | #DIV/0!  |             |         |         |          |
| 4.021   | 2.96722E-06 | 933.533 | 3992.5  | 4.27676  |             |         |         |          |
|         |             |         |         |          | 0.0026345   | 754.933 | #DIV/0! | #DIV/0!  |
|         |             |         |         |          | 5.70954E-15 | 6984.93 | 15299.6 | 2.19037  |
|         |             |         |         |          | 2.73958E-09 | 5650.03 | 13419.3 | 2.37508  |
|         | 0.000004052 | 2694.5  | 7012.93 | 2.60268  |             |         |         |          |
|         |             |         |         |          | 0.00218383  | 748.2   | 1787.28 | 2.38877  |
|         |             |         |         |          | 0.0222097   | 1107.75 | 460.533 | -2.40536 |
|         | 0.000314573 | 734.033 | #DIV/0! | #DIV/0!  |             |         |         |          |
|         |             |         |         |          | 1.71649E-13 | 15568.4 | 54357.8 | 3.49155  |
| 2.22146 | 2.0921E-06  | 2195.53 | 7204.25 | 3.28133  | 1.21594E-06 | 1748.3  | 5036.15 | 2.8806   |
|         |             |         |         |          | 3.45129E-13 | 6583.68 | 24977.1 | 3.7938   |
|         | 6.45462E-06 | 14660.8 | 36085.4 | 2.46136  | 3.05804E-11 | 7013.15 | 31121.5 | 4.4376   |
| #DIV/0! |             |         |         |          |             |         |         |          |
|         |             |         |         |          | 9.52058E-06 | 1501.73 | 3291.7  | 2.19195  |
|         |             |         |         |          | 0.00369588  | 1333.8  | 440.05  | -3.03102 |
| -2.2209 | 8.06897E-05 | 1585.28 | 740.025 | -2.14219 |             |         |         |          |
| -2.244  | 5.13944E-05 | 1046.6  | 398.567 | -2.62591 | 3.96642E-08 | 1747.63 | 649.55  | -2.69052 |
|         | 0.0040845   | 1051.6  | 373.833 | -2.81302 | 0.00021089  | 2828.28 | 736.275 | -3.84133 |
|         |             |         |         |          | 0.000763385 | 1747    | 743.7   | -2.34907 |
|         | 0.0111718   | 596.375 | 267.1   | -2.23278 | 0.00141344  | 903.775 | #DIV/0! | #DIV/0!  |
|         |             |         |         |          | 0.0215204   | 1603.15 | 514.35  | -3.11685 |
| 2.15249 | 5.52707E-07 | 23804.2 | 123127  | 5.17249  | 3.58656E-08 | 50105.2 | 212438  | 4.23984  |
| 2.2077  | 7.43008E-07 | 22875.1 | 120957  | 5.28771  | 2.18512E-08 | 46116   | 212301  | 4.60362  |
| 2.59092 | 1.96402E-08 | 18475.4 | 131183  | 7.1004   | 3.88082E-09 | 40142.6 | 209539  | 5.21987  |

|         |             |         |         |             |         |         |          |
|---------|-------------|---------|---------|-------------|---------|---------|----------|
|         |             |         |         | 1.70727E-09 | 1535.9  | 4349.98 | 2.8322   |
|         |             |         |         | 8.15827E-12 | 2418.33 | 7655.98 | 3.16582  |
|         |             |         |         | 0.0150475   | 1117.48 | 393.4   | -2.84056 |
|         |             |         |         | 0.00412115  | 1961.05 | 770.025 | -2.54674 |
|         |             |         |         | 0.000735448 | 1507.13 | #DIV/0! | #DIV/0!  |
|         | 0.0020458   | 3820.78 | 7649.2  | 4.58633E-06 | 4306.4  | 9513.43 | 2.20914  |
|         | 1.84913E-05 | 1120.65 | 443.475 | 9.1351E-07  | 1673.2  | 597.425 | -2.80069 |
|         |             |         |         | 0.000386541 | 3271.75 | #DIV/0! | #DIV/0!  |
|         | 0.0135038   | #DIV/0! | 2083.98 | 0.0017584   | #DIV/0! | 1855.25 | #DIV/0!  |
|         |             |         |         | 0.00600031  | #DIV/0! | 2782.18 | #DIV/0!  |
|         | 0.000711758 | 670.45  | 333.733 |             |         |         | -2.00894 |
|         |             |         |         | 2.65452E-05 | 2598.3  | 994.667 | -2.61223 |
|         | 0.000783466 | 800.733 | 198.15  | 0.00115822  | 1672.48 | #DIV/0! | #DIV/0!  |
|         | 5.41341E-07 | 1375.53 | 424.025 | 1.59877E-10 | 4498.3  | 828.325 | -5.4306  |
|         | 6.45679E-05 | 2690.83 | 1246.4  |             |         |         | -2.15888 |
|         | 0.0137264   | 815.6   | 233.2   |             |         |         | -3.49743 |
|         | 0.00051316  | 1621.83 | 325.3   |             |         |         | -4.98565 |
|         | 0.00302385  | 677.667 | 247.5   |             |         |         | -2.73805 |
|         | 0.00581267  | #DIV/0! | 1785.53 |             |         |         | #DIV/0!  |
| 8.27579 | 5.04044E-22 | 4040.05 | 64998.6 | 5.2987E-23  | 5220.53 | 86865.4 | 16.6392  |
|         | 0.00434035  | 28377.8 | 9843.63 | 0.00242328  | 20772.4 | 6045.1  | -3.43623 |
|         | 0.00647761  | 18607.4 | 8097.33 | 0.00149978  | 14934.3 | 4443.08 | -3.36126 |
|         | 0.00482055  | 17847.1 | 6448.35 | 0.0026289   | 12381.9 | 4105.03 | -3.01627 |
|         | 0.000458162 | 1021.23 | 437.15  | 0.00219076  | 1089.48 | 398.075 | -2.73686 |
|         |             |         |         | 0.0078269   | 2670.8  | 1054.57 | -2.5326  |
|         | 4.79784E-05 | 15482.6 | 5786.48 | 0.000107031 | 12872.7 | 4732.03 | -2.72034 |
| -2.4409 | 6.08699E-06 | 13069.1 | 3062.93 |             |         |         | -4.26686 |
| -2.1044 | 2.89714E-07 | 22577.5 | 11171.5 |             |         |         | -2.02099 |
|         |             |         |         | 1.01458E-08 | 2639.73 | 8193.13 | 3.10377  |
|         | 0.000102892 | 631.175 | 190.7   | 1.19409E-05 | 1004.93 | 425.6   | -2.36122 |
|         | 2.11235E-05 | 1158.9  | 3500.83 |             |         |         | 3.02082  |
|         | 0.000552328 | #DIV/0! | 1239.9  | 0.0212614   | #DIV/0! | 1647.67 | #DIV/0!  |
|         |             |         |         | 0.00197934  | 3418.23 | 1469.35 | -2.32635 |
| -3.5069 | 4.24802E-06 | 823.675 | 172.1   | 4.33045E-05 | 979.225 | 265.733 | -3.68499 |
| -3.3347 | 2.47922E-06 | 2845.38 | 418.475 | 0.00286205  | 1659.25 | 584.875 | -2.83693 |
| -5.239  |             |         |         | 0.000378757 | 1158.15 | 514.467 | -2.25117 |
|         | 5.89004E-07 | 933.9   | #DIV/0! |             |         |         | #DIV/0!  |
|         | 0.000288308 | 944.9   | 461.533 | 4.03232E-07 | 1367.6  | 332.15  | -4.11742 |
|         |             |         |         | 1.19494E-07 | 1955.55 | 511.4   | -3.82391 |
|         | 0.000016963 | 1375.2  | 553.425 | 2.81824E-06 | 2360.15 | 839.975 | -2.80979 |
|         |             |         |         | 0.000467133 | 3408.48 | 758.667 | -4.49272 |
|         |             |         |         | 0.00563987  | 1497.03 | 544.233 | -2.75072 |
|         |             |         |         | 2.52088E-07 | 1834.4  | 672.9   | -2.72611 |
|         |             |         |         | 0.000107658 | 1959.6  | 978.7   | -2.00225 |
|         |             |         |         | 0.000210596 | 1661.97 | #DIV/0! | #DIV/0!  |
|         | 1.57277E-11 | 7065.63 | 17265   | 5.11024E-17 | 3550.15 | 13326.5 | 3.75379  |
|         |             |         |         | 3.71313E-07 | 4281.48 | 8792.63 | 2.05364  |
|         | 0.000269695 | 774.3   | 342.8   | 4.01032E-07 | 1407.83 | 342.3   | -4.11284 |
|         | 4.94158E-07 | 895.75  | 271.333 | 6.41867E-08 | 1875.65 | 476.05  | -3.94003 |
|         | 4.88361E-07 | 992.675 | 241.75  | 3.11047E-06 | 1514.65 | 485.85  | -3.11753 |
|         |             |         |         | 1.04303E-06 | 2050.73 | 602.4   | -3.40426 |
|         | 0.000154151 | 748.65  | 314.575 |             |         |         | -2.37988 |
|         | 6.94453E-06 | 1933.1  | 903.65  |             |         |         | -2.13921 |
|         | 4.14835E-07 | 2557.53 | 965.55  | 9.35519E-09 | 4612.3  | 1333.88 | -3.45782 |
|         | 0.00149388  | 1391.93 | 2860.2  | 0.00013358  | 1041.47 | 2249.38 | 2.15981  |
|         | 0.00346244  | #DIV/0! | 3204.33 |             |         |         | #DIV/0!  |
| 2.65945 |             |         |         | 0.0158481   | #DIV/0! | 1332.85 | #DIV/0!  |
| 2.16782 | 0.00726837  | 927.8   | 2041    | 1.99149E-05 | #DIV/0! | 1173.13 | #DIV/0!  |
|         | 0.00818686  | 770.1   | 1696.5  | 0.000273999 | 1375.7  | 666.375 | -2.06445 |
|         |             |         |         | 0.00012586  | #DIV/0! | 2872.83 | #DIV/0!  |
|         |             |         |         | 0.00217589  | #DIV/0! | 2449.43 | #DIV/0!  |
|         |             |         |         | 0.00228946  | #DIV/0! | 1028.2  | #DIV/0!  |



|         |             |         |         |             |             |         |          |
|---------|-------------|---------|---------|-------------|-------------|---------|----------|
|         |             |         |         | 0.0190385   | #DIV/0!     | 1858.08 | #DIV/0!  |
|         | 0.00567714  | 993.267 | 307.2   | -3.23329    |             |         |          |
|         |             |         |         | 6.87154E-12 | 9890.35     | 23018.2 | 2.32733  |
|         |             |         |         | 0.000541378 | 2283.65     | 461.167 | -4.9519  |
|         |             |         |         | 0.0016732   | 2939.6      | 720.5   | -4.07994 |
|         |             |         |         | 0.00203818  | 1361.5      | #DIV/0! | #DIV/0!  |
| -3.7121 | 8.48166E-07 | 2345.03 | 495.8   | -4.72978    | 2.6747E-08  | 4237.1  | 668.775  |
| -3.3977 |             |         |         |             | 3.71098E-06 | 2581.8  | 864.45   |
|         |             |         |         |             | 3.58752E-09 | 3724.15 | 889.4    |
|         |             |         |         |             | 2.16822E-07 | 3270.8  | 387.1    |
|         |             |         |         |             | 8.31647E-06 | 3091.5  | #DIV/0!  |
|         |             |         |         |             | 8.18956E-05 | 4135.48 | 636.15   |
|         |             |         |         |             | 0.000216164 | 1235.33 | #DIV/0!  |
|         |             |         |         |             | 0.00799535  | 1332.73 | 476.15   |
| #DIV/0! |             |         |         |             | 3.97359E-06 | 1740.25 | 622.35   |
|         | 8.2329E-07  | 4772.68 | 1793.85 | -2.66058    |             |         |          |
|         | 0.00035275  | 3217.77 | 1351.8  | -2.38036    |             |         |          |
|         |             |         |         | 0.0115188   | #DIV/0!     | 3471.13 | #DIV/0!  |
|         |             |         |         | 0.00400072  | #DIV/0!     | 1817.7  | #DIV/0!  |
|         |             |         |         | 9.89031E-05 | #DIV/0!     | 1905.7  | #DIV/0!  |
|         |             |         |         | 1.9069E-07  | 6039.13     | 14190   | 2.34968  |
|         |             |         |         | 6.3845E-08  | 2897.1      | 7342.18 | 2.53432  |
|         |             |         |         | 6.64779E-07 | 2024.83     | 9060.73 | 4.4748   |
|         | 0.000033719 | 6717.28 | 15557.8 | 2.31609     | 9.27321E-12 | 1811.1  | 8582.7   |
|         | 7.95528E-05 | 4821.78 | 10395   | 2.15583     | 4.63242E-06 | 2389.13 | 5660.1   |
|         | 0.000172249 | 4302.5  | 9474.33 | 2.20205     | 3.0104E-06  | 2297.73 | 5487.33  |
|         |             |         |         |             | 2.38613E-06 | 909.267 | 206      |
|         |             |         |         |             | 1.69996E-05 | 2688.3  | 6272.9   |
|         | 5.79725E-09 | 2043.15 | 8080.95 | 3.95514     | 2.83962E-05 | 742.8   | 1900.58  |
|         | 0.000614221 | 895.45  | 2122.35 | 2.37015     | 3.70169E-11 | 2324.03 | 718.225  |
|         | 1.15927E-07 | 1407.03 | 645.1   | -2.1811     | 2.92494E-10 | 6271.53 | 2302.85  |
| -2.4359 | 9.09935E-08 | 5732.35 | 2568.13 | -2.23211    |             |         |          |
|         | 1.61277E-10 | 5922.05 | 2194.53 | -2.69856    |             |         |          |
| #DIV/0! | 2.0625E-06  | 1387.4  | #DIV/0! | #DIV/0!     |             |         |          |
|         | 4.18451E-08 | 1483.45 | 3502.58 | 2.3611      | 5.7711E-08  | 1788.53 | 4151.65  |
|         |             |         |         |             | 8.92653E-11 | 4775.98 | 15124.2  |
|         |             |         |         |             | 7.23401E-11 | 2962.05 | 10286    |
|         | 0.00275184  | 543.4   | 269.367 | -2.01732    | 0.0218076   | 1126.8  | 444.7    |
| -3.6114 | 5.31692E-16 | 7294.63 | 1420.03 | -5.13697    | 3.17437E-08 | 2564.7  | 1219.6   |
| -2.7903 | 1.61805E-08 | 24534.8 | 4986.65 | -4.92009    |             |         |          |
| -3.5012 | 4.93332E-09 | 7110.3  | 1779.4  | -3.9959     |             |         |          |
| -2.9001 | 1.17114E-08 | 15111.7 | 3975.05 | -3.80164    |             |         |          |
| -4.2114 |             |         |         |             |             |         |          |
|         |             |         |         |             | 2.74141E-05 | 1620.45 | 550.75   |
|         | 0.00212826  | 729.325 | 350.2   | -2.0826     | 0.000233888 | 1850.48 | 498.7    |
|         | 0.000718626 | 886.6   | 251.633 | -3.52338    | 1.80661E-06 | 1995.83 | 563.15   |
|         |             |         |         |             | 5.43897E-05 | 1621    | 306.3    |
|         |             |         |         |             | 0.0121857   | 1574.13 | 441.2    |
|         |             |         |         |             | 0.00020949  | 1391.87 | 439.2    |
|         |             |         |         |             | 0.00675099  | 1573.17 | #DIV/0!  |
| -2.0503 |             |         |         |             | 0.000773705 | #DIV/0! | 2021.3   |
|         |             |         |         |             | 2.72846E-09 | 5923.8  | 1711.43  |
|         |             |         |         |             | 1.03907E-06 | 3179.53 | 1285.13  |
|         | 2.20385E-08 | 1402.15 | 571.45  | -2.45367    |             |         |          |
|         |             |         |         |             | 1.30214E-07 | 5489.53 | 14407.6  |
|         |             |         |         |             | 7.33984E-10 | 3438.63 | 1381.07  |
|         |             |         |         |             | 0.000348618 | 1776.9  | 662.4    |
|         |             |         |         |             | 6.77728E-10 | 1277.23 | 400.275  |
| -2.6253 | 0.000609831 | 1356.25 | 596.45  | -2.27387    |             |         |          |
|         |             |         |         |             | 1.27847E-08 | 4673    | 13918.4  |
| -2.1712 | 2.93733E-11 | 1145.97 | 387.1   | -2.96039    |             |         |          |

|         |             |         |         |          |             |         |         |          |
|---------|-------------|---------|---------|----------|-------------|---------|---------|----------|
| -2.0664 |             |         |         |          | 1.46205E-06 | 1203.88 | 427.333 | -2.81718 |
|         |             |         |         |          | 6.36225E-09 | 43465.1 | 144594  | 3.32667  |
|         |             |         |         |          | 1.13902E-09 | 23577.9 | 111496  | 4.72884  |
|         |             |         |         |          | 1.31996E-11 | 20865.3 | 169656  | 8.13101  |
|         | 7.28798E-05 | 519.933 | 203.4   | -2.55621 |             |         |         |          |
|         | 0.0014332   | 898.133 | #DIV/0! | #DIV/0!  |             |         |         |          |
|         |             |         |         |          | 2.09916E-12 | 1131.8  | 3073.63 | 2.7157   |
|         |             |         |         |          | 1.73817E-08 | 1232.13 | #DIV/0! | #DIV/0!  |
|         | 0.000328711 | #DIV/0! | 2141.48 | #DIV/0!  | 0.000236248 | #DIV/0! | 4220.05 | #DIV/0!  |
|         |             |         |         |          | 4.76813E-11 | 1714.97 | 4933.1  | 2.8765   |
|         | 6.9152E-06  | 5244.05 | 13655.6 | 2.60401  | 9.18495E-08 | 2418.2  | 6919.58 | 2.86146  |
|         |             |         |         |          | 2.3061E-11  | 21431.1 | 72991.5 | 3.40587  |
| 7.29486 | 8.11601E-11 | 1807.5  | 14016.5 | 7.75462  | 9.28728E-07 | 2019.98 | 7229.18 | 3.57884  |
|         |             |         |         |          | 0.00973451  | 1146.03 | 361.033 | -3.17429 |
|         |             |         |         |          | 0.0053784   | 1207.05 | 396.2   | -3.04657 |
|         |             |         |         |          | 1.15336E-09 | 4305.55 | 11871   | 2.75714  |
|         |             |         |         |          | 0.00034906  | 713.725 | 314.15  | -2.27192 |
|         |             |         |         |          | 3.82653E-07 | 2744.88 | 1131.03 | -2.42689 |
|         |             |         |         |          | 0.00031295  | 1723.25 | 812.075 | -2.12203 |
| -2.7831 |             |         |         |          |             |         |         |          |
| -2.0813 |             |         |         |          |             |         |         |          |
|         |             |         |         |          | 2.07316E-06 | 1293.3  | 588.833 | -2.19638 |
|         |             |         |         |          | 1.78112E-07 | 14981.4 | 33000.6 | 2.20277  |
|         |             |         |         |          | 3.03945E-09 | 31609.3 | 71758.3 | 2.27017  |
|         |             |         |         |          | 1.18271E-09 | 28778.4 | 68111.1 | 2.36674  |
|         |             |         |         |          | 2.15841E-09 | 26602.4 | 63814.3 | 2.39882  |
|         |             |         |         |          | 4.43935E-11 | 23530.8 | 66235.1 | 2.81483  |
|         |             |         |         |          | 9.44153E-10 | 6293.9  | 15045.6 | 2.39051  |
|         |             |         |         |          | 2.43428E-12 | 8274.45 | 24512.2 | 2.9624   |
|         |             |         |         |          | 1.51069E-09 | 4431.35 | 11756.4 | 2.65301  |
| -2.7551 | 4.94524E-09 | 8753.15 | 2061.65 | -4.2457  | 7.83712E-08 | 3322.63 | 1006.45 | -3.30133 |
|         | 7.08251E-05 | 1156.08 | 293     | -3.94565 |             |         |         |          |
| 2.23692 |             |         |         |          |             |         |         |          |
|         |             |         |         |          | 5.36606E-13 | 12101.5 | 48467.4 | 4.00506  |
| -2.7634 | 0.000120492 | 1879.95 | 727.875 | -2.58279 | 0.000247784 | 2550.63 | 980.95  | -2.60016 |
|         |             |         |         |          | 0.0170355   | 1296.1  | 590.367 | -2.19542 |
|         |             |         |         |          | 3.24255E-07 | 8339.83 | 2510.8  | -3.32158 |
|         |             |         |         |          | 8.11322E-05 | 8134.25 | 2645.98 | -3.0742  |
|         | 0.0112129   | 8559.5  | 22455.2 | 2.62342  | 6.77297E-09 | 2299.57 | 27569.9 | 11.9892  |
|         |             |         |         |          | 0.00085149  | 1283.9  | 420.45  | -3.05363 |
|         | 0.0039529   | 632.575 | 149.2   | -4.23978 |             |         |         |          |
|         |             |         |         |          | 1.58951E-07 | 1847.4  | 883.1   | -2.09195 |
|         |             |         |         |          | 4.40394E-12 | 2374.8  | 7356.55 | 3.09776  |
|         |             |         |         |          | 0.00896939  | 1257.23 | 260.5   | -4.8262  |
|         |             |         |         |          | 0.00214658  | 1002.07 | #DIV/0! | #DIV/0!  |
|         |             |         |         |          | 2.03907E-14 | 5811.9  | 24042.8 | 4.13683  |
|         | 1.32585E-05 | 3663.78 | 9441.75 | 2.57706  | 4.48641E-10 | 1636    | 7498.03 | 4.58314  |
|         |             |         |         |          | 2.18733E-18 | 4411.63 | 32013.7 | 7.25667  |
|         |             |         |         |          | 0.000262764 | 1315.47 | #DIV/0! | #DIV/0!  |
|         |             |         |         |          | 1.59109E-10 | 2772.6  | 6682.48 | 2.41018  |
|         |             |         |         |          | 1.92393E-07 | 1304.45 | 3897.65 | 2.98796  |
|         |             |         |         |          | 1.17538E-13 | 2069.38 | 9122.33 | 4.40825  |
|         |             |         |         |          | 1.47102E-08 | #DIV/0! | 3486.8  | #DIV/0!  |
|         |             |         |         |          | 7.62919E-08 | #DIV/0! | 3253.15 | #DIV/0!  |
|         |             |         |         |          | 3.06494E-07 | 2821.6  | 6831.65 | 2.4212   |
|         |             |         |         |          | 8.94861E-08 | 4699.1  | 10068.6 | 2.14267  |
|         | 1.68011E-06 | 8415.7  | 17013.5 | 2.02164  | 1.285E-09   | 5077.15 | 13927.8 | 2.74323  |
|         |             |         |         |          | 1.00479E-10 | 8206.23 | 24207.3 | 2.94986  |
|         |             |         |         |          | 0.000421975 | 3266.43 | 1415.23 | -2.30806 |
|         |             |         |         |          | 5.39858E-14 | 2223.3  | 6426.18 | 2.89038  |
|         | 5.27073E-06 | 1150.9  | 336.625 | -3.41894 | 3.59478E-08 | 1831.85 | 427.7   | -4.28303 |
|         |             |         |         |          | 0.0183328   | 843.225 | 313.7   | -2.688   |
|         | 0.00179441  | 582.025 | #DIV/0! | #DIV/0!  | 0.00178902  | 1326.53 | 467.567 | -2.83708 |
| -2.6314 | 1.29735E-05 | 786.725 | 232.2   | -3.38814 |             |         |         |          |

|         |             |         |         |          |             |         |         |          |
|---------|-------------|---------|---------|----------|-------------|---------|---------|----------|
| -2.6921 | 5.58725E-07 | 1099.28 | 356.533 | -3.08323 |             |         |         |          |
|         | 2.70366E-05 | 951.1   | 354.05  | -2.68634 |             |         |         |          |
| 2.28559 | 1.10159E-06 | 1497.23 | 4439.1  | 2.96487  |             |         |         |          |
|         | 9.44498E-06 | 1557.35 | 5451.75 | 3.50066  | 8.43246E-08 | 2041.4  | 11118.8 | 5.44667  |
|         |             |         |         |          | 2.59184E-09 | 1855.65 | 13029.6 | 7.02157  |
|         |             |         |         |          | 0.000300252 | 1328.43 | 660.133 | -2.01237 |
| 2.54991 |             |         |         |          | 1.32176E-09 | #DIV/0! | 8920.88 | #DIV/0!  |
|         | 0.000299101 | 1274    | 410.35  | -3.10467 | 1.54177E-05 | 4100.7  | 865.25  | -4.73932 |
|         |             |         |         |          | 0.00251312  | 1081.55 | 229.3   | -4.71675 |
|         | 0.00993526  | 952.6   | 292.2   | -3.2601  | 0.000215589 | 2767.58 | 587     | -4.71478 |
|         |             |         |         |          | 0.000269057 | 3373.13 | 797.725 | -4.22843 |
|         | 0.00508614  | 1435.43 | 583.95  | -2.45814 | 1.39223E-18 | 7776.3  | 29406.2 | 3.78152  |
|         |             |         |         |          | 2.11196E-08 | 2911.93 | 5851.28 | 2.00942  |
|         |             |         |         |          | 3.69949E-05 | 1281.6  | 2623.08 | 2.04672  |
|         |             |         |         |          | 2.73697E-10 | 2996.95 | 7295.65 | 2.43436  |
|         |             |         |         |          | 0.00221922  | 1695.9  | #DIV/0! | #DIV/0!  |
|         |             |         |         |          | 0.000351758 | 1027.15 | #DIV/0! | #DIV/0!  |
|         |             |         |         |          | 1.08621E-05 | 1768.75 | 666.8   | -2.65259 |
|         | 1.59372E-05 | 1643.15 | 4860.98 | 2.95833  |             |         |         |          |
| 18.1728 | 1.21751E-16 | 3271.85 | 64281.9 | 19.6469  | 9.61165E-18 | 5642.38 | 109842  | 19.4673  |
|         | 0.00407324  | 2479.25 | 706.55  | -3.50895 | 0.000610246 | 6425.9  | 1274.08 | -5.04358 |
|         | 0.00837605  | 819.375 | 308.45  | -2.65643 | 0.000955592 | 1820.2  | 389.575 | -4.67227 |
| 7.89606 |             |         |         |          |             |         |         |          |
|         | 6.97482E-07 | 7064.45 | 16910.8 | 2.39379  | 5.11058E-12 | 3899.15 | 17368   | 4.45429  |
| 2.52377 |             |         |         |          | 2.31207E-14 | 25882.4 | 159865  | 6.17658  |
|         |             |         |         |          | 2.34283E-07 | 1820.58 | 764.667 | -2.38087 |
|         | 7.15092E-06 | 1528.03 | #DIV/0! | #DIV/0!  | 0.000154882 | 2927.2  | #DIV/0! | #DIV/0!  |
|         |             |         |         |          | 0.00222897  | 1291.43 | 389.133 | -3.31872 |
|         |             |         |         |          | 0.000844438 | 1669.95 | 527.225 | -3.16743 |
|         |             |         |         |          | 0.0149679   | 1519.95 | 500.333 | -3.03787 |
|         |             |         |         |          | 0.00475322  | 1563.43 | 436.8   | -3.57927 |
| -4.7686 | 6.68765E-06 | 1399.57 | 275.775 | -5.07503 |             |         |         |          |
| -4.8004 | 0.00020198  | 864     | 249.067 | -3.46895 |             |         |         |          |
|         | 0.000259561 | 2692.65 | 1012.2  | -2.6602  | 0.000120278 | 4376.28 | 1344.45 | -3.25507 |
| #DIV/0! |             |         |         |          |             |         |         |          |
|         | 0.000326508 | #DIV/0! | 3111.03 | #DIV/0!  | 5.9469E-09  | #DIV/0! | 3635.85 | #DIV/0!  |
| -5.7824 |             |         |         |          |             |         |         |          |
| -5.5058 |             |         |         |          |             |         |         |          |
| 2.66502 |             |         |         |          |             |         |         |          |
| #DIV/0! |             |         |         |          |             |         |         |          |
|         |             |         |         |          | 0.0184976   | 1233.08 | 322.5   | -3.82349 |
| -4.7797 | 1.06091E-06 | 2145.53 | 358.3   | -5.98807 | 3.28598E-05 | 3213.73 | 526.9   | -6.09931 |
|         |             |         |         |          |             |         |         |          |
|         | 0.000292873 | 655.167 | #DIV/0! | #DIV/0!  |             |         |         |          |
| -2.247  | 0.000145071 | 3954.05 | 1970    | -2.00713 |             |         |         |          |
|         |             |         |         |          | 6.08715E-07 | 1953.8  | #DIV/0! | #DIV/0!  |
| #DIV/0! | 0.000446745 | 1219.15 | #DIV/0! | #DIV/0!  | 9.343E-07   | 2142.3  | 351.9   | -6.08781 |
| #DIV/0! | 1.4554E-09  | 1184.55 | #DIV/0! | #DIV/0!  | 9.18165E-06 | 1928.8  | #DIV/0! | #DIV/0!  |
| 6.35093 | 1.08308E-06 | #DIV/0! | 4172.15 | #DIV/0!  | 0.00111456  | #DIV/0! | 5748.2  | #DIV/0!  |
|         |             |         |         |          | 0.000147493 | 1514.55 | 492.8   | -3.07336 |
|         | 3.58077E-06 | 1215.85 | 538.525 | -2.25774 | 8.6347E-09  | 1931.9  | 626.25  | -3.08487 |
|         | 1.58118E-09 | 962.75  | 473.967 | -2.03126 | 7.19758E-11 | 1930.17 | 676.233 | -2.85429 |
|         |             |         |         |          | 1.45197E-05 | 1758.2  | 735.133 | -2.39167 |
|         | 9.94377E-05 | 9852.08 | 22329.7 | 2.2665   | 8.60995E-06 | 3688.95 | 8208.8  | 2.22524  |
|         | 0.00264567  | 11221.3 | 23261.1 | 2.07293  |             |         |         |          |
|         |             |         |         |          | 9.87598E-07 | 2822.43 | 808.95  | -3.489   |
| #DIV/0! |             |         |         |          | 1.70857E-15 | 3039.15 | 10375.1 | 3.4138   |
| #DIV/0! |             |         |         |          |             |         |         |          |
|         |             |         |         |          | 8.91098E-08 | 18065   | 38951.6 | 2.15619  |

|         |             |         |         |          |             |         |         |          |
|---------|-------------|---------|---------|----------|-------------|---------|---------|----------|
|         |             |         |         |          | 5.8851E-07  | 1781.23 | 524.2   | -3.39799 |
|         |             |         |         |          | 1.55292E-10 | 1630.73 | 7600    | 4.66048  |
|         |             |         |         |          | 2.54254E-12 | 1959.33 | 16436.9 | 8.38901  |
|         |             |         |         |          | 7.74711E-07 | 6527.33 | 13726.8 | 2.10297  |
| 2.79999 | 1.20396E-09 | 2627.4  | 7378.98 | 2.80847  |             |         |         |          |
| 2.03759 |             |         |         |          |             |         |         |          |
| -3.183  | 2.19271E-10 | 2785.93 | 689.667 | -4.03952 |             |         |         |          |
| #DIV/0! |             |         |         |          | 6.78803E-05 | 1302.9  | #DIV/0! | #DIV/0!  |
|         |             |         |         |          | 0.000505121 | 1261.85 | 379.367 | -3.3262  |
|         |             |         |         |          | 4.94778E-12 | 8832.73 | 22118.9 | 2.50419  |
|         |             |         |         |          | 3.13974E-09 | 4649.2  | 12909   | 2.77661  |
|         |             |         |         |          | 0.0132258   | 1358.13 | 467.225 | -2.90679 |
|         |             |         |         |          | 0.00981216  | 1468.1  | 437.75  | -3.35374 |
|         |             |         |         |          | 0.0200406   | 1586.83 | 484.4   | -3.27587 |
|         |             |         |         |          | 0.0012338   | 1673.83 | #DIV/0! | #DIV/0!  |
|         | 0.00256599  | 1377.38 | 346.65  | -3.97339 | 4.14146E-05 | 5266.23 | 792.85  | -6.64215 |
| 7.15684 | 1.4068E-09  | #DIV/0! | 19866.3 | #DIV/0!  | 2.09464E-09 | 3130.6  | 16885.8 | 5.39378  |
|         |             |         |         |          | 0.000182783 | 2803.13 | 6611.35 | 2.35856  |
| 2.34092 |             |         |         |          |             |         |         |          |
|         | 0.000493293 | 1109.05 | 473.867 | -2.34043 | 0.000646413 | 1393.95 | 630.6   | -2.21051 |
|         |             |         |         |          | 0.00045172  | 1360.2  | 342.933 | -3.96637 |
|         |             |         |         |          | 0.000766999 | 1116.3  | 494.35  | -2.25812 |
|         | 3.56689E-07 | 9498.53 | 22770   | 2.39721  | 6.75306E-10 | 7875.98 | 24965.6 | 3.16984  |
|         | 2.92965E-07 | 8224.73 | 20833.4 | 2.53302  | 5.27651E-10 | 6910.78 | 23890.4 | 3.45697  |
|         | 4.63098E-09 | 5071.23 | 14509.8 | 2.8612   | 2.42016E-12 | 3893.88 | 15813.3 | 4.06106  |
| 2.7268  |             |         |         |          | 4.5542E-10  | #DIV/0! | 5159.95 | #DIV/0!  |
|         |             |         |         |          | 5.64098E-05 | 1918.97 | 708.225 | -2.70954 |
|         |             |         |         |          | 2.18891E-06 | 1411.65 | 545.533 | -2.58765 |
|         | 0.000288248 | 716.133 | 256.833 | -2.78832 | 5.23153E-05 | 748.5   | 299.833 | -2.49639 |
|         | 0.00029962  | 1272.55 | 609.425 | -2.08812 |             |         |         |          |
|         | 0.00687232  | 611.733 | #DIV/0! | #DIV/0!  |             |         |         |          |
|         | 2.29462E-06 | 858.567 | 161.9   | -5.30307 |             |         |         |          |
|         |             |         |         |          | 7.88568E-05 | 1538.73 | 739.433 | -2.08096 |
|         | 2.70016E-05 | 814.65  | 397.725 | -2.04827 | 7.43713E-07 | 1573.95 | 593.05  | -2.65399 |
|         | 3.53656E-06 | 916.95  | 370.233 | -2.47668 | 6.34194E-07 | 2043.68 | 622.167 | -3.28477 |
|         | 8.59832E-07 | 1302.4  | 318.933 | -4.08361 | 1.6689E-06  | 3373.73 | 895.25  | -3.76847 |
|         | 0.00024298  | 1069.48 | 299.7   | -3.56849 | 0.00031433  | 1868.33 | 807.3   | -2.31429 |
| -2.3903 | 1.64003E-10 | 3029    | 964.967 | -3.13897 | 2.04804E-08 | 2982.45 | 1144.45 | -2.60601 |
|         |             |         |         |          | 0.000125671 | 2447.03 | 799.9   | -3.05917 |
|         | 0.000258483 | 1208.9  | 542.15  | -2.22983 | 1.34138E-05 | 2245.63 | 740.775 | -3.03145 |
|         | 0.000271709 | 2121.98 | 875.7   | -2.42318 | 9.00287E-07 | 3809.83 | 1322.17 | -2.8815  |
|         |             |         |         |          | 0.00126566  | 1476.2  | #DIV/0! | #DIV/0!  |
|         | 2.16572E-07 | 1129.05 | 228.2   | -4.94763 | 4.92702E-06 | 1684.98 | 577.75  | -2.91644 |
|         | 0.000199352 | 5466.3  | 16520.6 | 3.02226  | 0.000071148 | 5907.03 | 18913.1 | 3.2018   |
|         | 0.000372055 | 4810.1  | 13035.4 | 2.71001  | 2.59011E-05 | 4877.25 | 16427.6 | 3.3682   |
|         |             |         |         |          | 0.0039347   | 1656.45 | 609.5   | -2.71772 |
|         | 1.6389E-07  | 10799.8 | 24904   | 2.30597  | 1.126E-16   | 3918.9  | 23644.1 | 6.03334  |
|         | 0.00270371  | 2451.25 | 1138.23 | -2.15357 |             |         |         |          |
|         |             |         |         |          | 8.06828E-10 | 1611.73 | 3461.55 | 2.14773  |
|         | 0.000196997 | 2482.3  | 858.167 | -2.89256 |             |         |         |          |
|         | 0.00123261  | 3611.4  | 1745.7  | -2.06874 | 0.00128894  | 5989.48 | 2552.03 | -2.34695 |
| -2.0116 |             |         |         |          |             |         |         |          |
| -2.0487 |             |         |         |          |             |         |         |          |
| -2.0263 |             |         |         |          |             |         |         |          |
|         | 1.06109E-05 | 1208.9  | 471.775 | -2.56245 | 5.36897E-06 | 2137.53 | 641.533 | -3.3319  |
| 2.14671 | 8.11059E-06 | 4381.05 | 9172.55 | 2.09369  |             |         |         |          |
|         | 5.34736E-07 | #DIV/0! | 1815.6  | #DIV/0!  |             |         |         |          |
|         |             |         |         |          | 0.0101447   | 705.825 | #DIV/0! | #DIV/0!  |
|         |             |         |         |          | 1.62559E-06 | #DIV/0! | 2557.48 | #DIV/0!  |
|         |             |         |         |          | 0.0165819   | 1416.6  | 545.225 | -2.59819 |
|         |             |         |         |          | 0.00164984  | 1297.93 | 580.7   | -2.23512 |

|                                       |             |         |         |          |             |         |         |          |
|---------------------------------------|-------------|---------|---------|----------|-------------|---------|---------|----------|
|                                       |             |         |         |          | 0.00468582  | 1205.73 | 353.367 | -3.41211 |
|                                       | 5.36164E-05 | 3939.38 | 1929.33 | -2.04184 |             |         |         |          |
| 2.84404                               | 9.34234E-13 | 6525.53 | 31538.2 | 4.83306  | 6.59277E-16 | 4690.9  | 31925.6 | 6.80586  |
|                                       |             |         |         |          | 7.96183E-05 | 3886.33 | 577.625 | -6.72811 |
|                                       |             |         |         |          | 6.38201E-07 | 1947.05 | 561.6   | -3.46697 |
|                                       | 0.000561069 | 1148.4  | 269.975 | -4.25373 | 0.000768843 | 1602.78 | 576.8   | -2.77874 |
|                                       |             |         |         |          | 4.06868E-06 | 11044.8 | 3476.55 | -3.17694 |
|                                       | 4.46479E-05 | 1854.48 | #DIV/0! | #DIV/0!  | 2.41329E-05 | 3371.05 | 1151.85 | -2.92664 |
|                                       | 5.77311E-09 | 4303.28 | 1357.93 | -3.16901 | 4.91268E-08 | 5023.4  | 1747.7  | -2.87429 |
|                                       |             |         |         |          | 2.22923E-07 | 4785.05 | 1882.68 | -2.54162 |
|                                       |             |         |         |          | 2.12782E-05 | 6591.9  | 2717.9  | -2.42537 |
|                                       |             |         |         |          | 0.00312546  | 1405.4  | 424.575 | -3.31013 |
| #DIV/0!                               | 4.70619E-05 | #DIV/0! | 2830.6  | #DIV/0!  |             |         |         |          |
| 4.19489                               | 5.79763E-09 | 1053.6  | 3247.18 | 3.08198  | 2.12684E-07 | 1879.97 | 4519.38 | 2.40397  |
| 4.00468                               | 1.24366E-09 | 1539.83 | 8247.73 | 5.35627  | 1.14151E-08 | 1433.43 | 5481.23 | 3.82387  |
|                                       |             |         |         |          |             |         |         |          |
|                                       |             |         |         |          | 2.92338E-06 | 4720.13 | 886.7   | -5.32325 |
|                                       |             |         |         |          | 0.000024512 | 4962.43 | 789.35  | -6.28672 |
|                                       |             |         |         |          | 0.00106277  | 2785.17 | 551.4   | -5.05108 |
|                                       |             |         |         |          | 7.17517E-09 | #DIV/0! | 3092.1  | #DIV/0!  |
| -2.0424                               | 8.10125E-11 | 7912.93 | 3610.9  | -2.1914  | 3.05677E-14 | 1702.6  | 470.733 | -3.61691 |
| -2.1238                               |             |         |         |          |             |         |         |          |
|                                       | 0.000164914 | 1332.08 | 530.6   | -2.51051 | 1.14136E-05 | 1987.03 | 857.9   | -2.31615 |
|                                       | 0.0107139   | 774.067 | #DIV/0! | #DIV/0!  |             |         |         |          |
|                                       |             |         |         |          | 3.6632E-07  | 925.95  | 1900.85 | 2.05286  |
|                                       |             |         |         |          | 1.2774E-06  | 62198.7 | 132043  | 2.12292  |
|                                       |             |         |         |          | 1.2462E-07  | 35091.5 | 78306.3 | 2.23149  |
|                                       |             |         |         |          | 8.21951E-10 | 37124.4 | 103319  | 2.78305  |
| -2.0231                               | 6.3919E-08  | 5033.43 | 2077.83 | -2.42245 |             |         |         |          |
|                                       |             |         |         |          | 0.000944462 | #DIV/0! | 1990.18 | #DIV/0!  |
|                                       | 9.64575E-05 | 1339.87 | 286.65  | -4.67423 | 0.000077944 | 2733.33 | 759.225 | -3.60015 |
|                                       |             |         |         |          | 0.000440416 | 1054.23 | 279.6   | -3.77048 |
|                                       |             |         |         |          | 2.29967E-09 | 3083.53 | 20864.3 | 6.76638  |
|                                       |             |         |         |          | 0.0185617   | #DIV/0! | 1000.8  | #DIV/0!  |
|                                       |             |         |         |          | 1.55543E-13 | 8462.9  | 29965.6 | 3.54081  |
|                                       |             |         |         |          | 0.00665018  | 1280.68 | 340.25  | -3.76392 |
|                                       |             |         |         |          | 6.30642E-05 | 4432.58 | 2128.85 | -2.08215 |
|                                       | 9.71193E-07 | 10344.4 | 23524.6 | 2.27414  | 1.81024E-09 | 7407.25 | 20734.9 | 2.79926  |
|                                       | 1.70085E-06 | 12621.8 | 25308.5 | 2.00514  | 2.59082E-12 | 7540.18 | 24846.5 | 3.29521  |
|                                       |             |         |         |          | 2.1685E-07  | 2615.8  | 872.025 | -2.99968 |
|                                       |             |         |         |          | 7.27618E-05 | 1008.58 | 498.225 | -2.02434 |
|                                       |             |         |         |          | 4.27427E-08 | 705.8   | #DIV/0! | #DIV/0!  |
|                                       |             |         |         |          | 0.000109284 | 2605.4  | 664.733 | -3.91947 |
|                                       |             |         |         |          | 2.23453E-06 | 2292.58 | 359.975 | -6.36871 |
|                                       |             |         |         |          | 0.00275467  | 1021.63 | #DIV/0! | #DIV/0!  |
| 3.54388                               | 1.95737E-14 | 13272.4 | 63838.5 | 4.80988  | 5.62001E-17 | 13431   | 80647.5 | 6.00459  |
| 3366 /// 729423 /// 730246            |             |         |         |          | 1.39606E-06 | 28982.2 | 10641.7 | -2.72347 |
| 3732 /// 729102 /// 729366 /// 730246 |             |         |         |          | 3.12646E-07 | 3050.8  | 1310.3  | -2.32832 |
|                                       |             |         |         |          | 0.000330903 | 1333.73 | 592.65  | -2.25044 |
|                                       |             |         |         |          | 0.000998202 | 990.8   | 245.65  | -4.03338 |
|                                       |             |         |         |          | 1.61468E-10 | 3182.33 | 8617.23 | 2.70784  |
|                                       |             |         |         |          | 0.000449231 | #DIV/0! | 1854.15 | #DIV/0!  |
| -2.2359                               |             |         |         |          |             |         |         |          |
|                                       | 5.28549E-06 | 3390.5  | 1465.93 | -2.31287 | 1.37247E-08 | 7913.73 | 2813.25 | -2.81302 |
|                                       |             |         |         |          | 3.90968E-09 | 27978.3 | 61883.7 | 2.21185  |
|                                       | 2.69532E-07 | 5258.33 | 12307.8 | 2.34062  | 6.67928E-12 | 2454    | 9384    | 3.82396  |
|                                       | 2.17384E-05 | 1999.65 | 808.75  | -2.47252 |             |         |         |          |
| -2.0939                               | 3.12819E-08 | 8108.4  | 3817.23 | -2.12416 |             |         |         |          |
| 2.04359                               | 4.64308E-10 | 1255.6  | 5295.9  | 4.21782  | 1.04231E-10 | 1536.07 | 6119.58 | 3.98393  |
| #DIV/0!                               | 2.15071E-07 | #DIV/0! | 3300.53 | #DIV/0!  | 2.72787E-07 | #DIV/0! | 3557.18 | #DIV/0!  |

|         |             |         |         |          |             |         |         |          |
|---------|-------------|---------|---------|----------|-------------|---------|---------|----------|
|         | 6.03636E-05 | #DIV/0! | 1559.08 | #DIV/0!  | 0.00480082  | #DIV/0! | 2322.88 | #DIV/0!  |
|         |             |         |         |          | 1.01766E-06 | #DIV/0! | 4740.98 | #DIV/0!  |
|         | 0.000304511 | 562.1   | #DIV/0! | #DIV/0!  |             |         |         |          |
|         |             |         |         |          | 0.000800779 | 1278.93 | 384.6   | -3.32536 |
|         |             |         |         |          | 0.000259984 | 1420.13 | 476.367 | -2.98116 |
|         |             |         |         |          | 1.91737E-05 | 1616.58 | 484.067 | -3.33957 |
|         | 0.000891823 | 929.967 | #DIV/0! | #DIV/0!  | 0.00290362  | 2905.35 | 880.2   | -3.30078 |
|         | 0.00648402  | 1232.73 | 474.175 | -2.59973 | 5.73554E-06 | 1181.45 | 391.8   | -3.01544 |
|         |             |         |         |          | 3.24641E-05 | 1368.73 | #DIV/0! | #DIV/0!  |
|         |             |         |         |          | 6.79899E-07 | 1534.18 | 499.3   | -3.07265 |
|         |             |         |         |          | 1.36488E-09 | 2639.47 | 6064.48 | 2.29761  |
|         |             |         |         |          | 7.17811E-10 | 957.5   | 3632.35 | 3.79358  |
|         | 8.46374E-08 | 1301.8  | 565.467 | -2.30217 |             |         |         |          |
| -2.3828 |             |         |         |          | 0.00724435  | 3332.75 | 819.6   | -4.06631 |
|         |             |         |         |          | 0.0156717   | 1542.87 | 750.65  | -2.05537 |
|         |             |         |         |          | 6.52194E-07 | 1655.83 | 772.45  | -2.1436  |
| -2.888  | 3.20285E-08 | 5291.93 | 2243.9  | -2.35836 |             |         |         |          |
|         | 0.000136389 | 2002.78 | 935.075 | -2.14183 |             |         |         |          |
|         |             |         |         |          | 0.0157137   | 678.5   | 329.7   | -2.05793 |
| -2.2343 |             |         |         |          |             |         |         |          |
|         |             |         |         |          | 4.82777E-05 | #DIV/0! | 1385.8  | #DIV/0!  |
|         |             |         |         |          | 0.00114813  | 881.433 | #DIV/0! | #DIV/0!  |
| -2.0605 |             |         |         |          |             |         |         |          |
| -2.37   | 2.22826E-05 | 1022.5  | 489.6   | -2.08844 |             |         |         |          |
|         | 1.94405E-08 | 560.5   | 1517.35 | 2.70714  |             |         |         |          |
|         |             |         |         |          | 0.0100222   | 858.3   | #DIV/0! | #DIV/0!  |
|         | 0.000379115 | 20546.6 | 5195.15 | -3.95495 | 9.26695E-06 | 9878.73 | 1750.33 | -5.64394 |
|         | 1.45146E-06 | 2730.03 | 495.3   | -5.51186 | 8.36442E-10 | 2898.73 | #DIV/0! | #DIV/0!  |
|         |             |         |         |          | 5.11414E-10 | 11968   | 29312.7 | 2.44926  |
| 2.03401 | 0.000209301 | 1509.77 | 3857.68 | 2.55515  | 9.07823E-05 | #DIV/0! | 3636.5  | #DIV/0!  |
|         | 3.5393E-06  | 2927.85 | 9649.33 | 3.2957   |             |         |         |          |
|         | 2.03954E-09 | 15752   | 34751.6 | 2.20617  |             |         |         |          |
|         | 0.00492469  | 1153.05 | 543     | -2.12348 | 5.22091E-17 | 8140.43 | 34676.6 | 4.2598   |
|         |             |         |         |          | 3.52726E-06 | 1031.1  | 242.8   | -4.24671 |
|         |             |         |         |          | 0.00248469  | 1387.7  | 302.75  | -4.58365 |
|         |             |         |         |          | 0.000175602 | 1565.68 | 457.925 | -3.41906 |
|         |             |         |         |          | 0.00305037  | 1204.37 | 350.467 | -3.43647 |
|         |             |         |         |          | 1.00947E-05 | 944.35  | #DIV/0! | #DIV/0!  |
| -5.7826 | 6.86514E-14 | 5548.48 | 703.525 | -7.88668 | 2.96566E-10 | 2850.2  | 7834.43 | 2.74873  |
| -7.3017 | 7.11993E-11 | 6291.48 | 737.175 | -8.53457 | 5.39185E-11 | 2606.7  | 589.575 | -4.42132 |
|         |             |         |         |          | 4.55322E-06 | 2236.13 | 702.2   | -3.18446 |
|         |             |         |         |          | 0.0110825   | 869.725 | 231.6   | -3.75529 |
|         |             |         |         |          | 6.04882E-05 | 2269.28 | 862.575 | -2.63081 |
|         |             |         |         |          | 7.72566E-19 | 5837.73 | 24378.1 | 4.17595  |
|         |             |         |         |          | 1.13216E-11 | 2746.4  | 835.275 | -3.28802 |
|         | 3.5116E-07  | 1130.18 | 338.5   | -3.33877 | 6.42073E-08 | 2460.73 | 676.6   | -3.6369  |
|         |             |         |         |          | 0.000825123 | #DIV/0! | 1492.15 | #DIV/0!  |
| #DIV/0! | 9.0259E-10  | #DIV/0! | 86414.6 | #DIV/0!  | 3.22873E-12 | 13750.4 | 116725  | 8.48882  |
| 121.923 | 7.84424E-17 | 1177.13 | 76153.8 | 64.6947  | 1.24633E-15 | 6726.8  | 96765.8 | 14.3851  |
| -2.2388 |             |         |         |          |             |         |         |          |
| -2.0292 |             |         |         |          |             |         |         |          |
|         |             |         |         |          | 8.72183E-09 | 3900.28 | 11692.7 | 2.99791  |
|         | 8.16946E-12 | 1743.58 | 7308.38 | 4.1916   | 1.75349E-13 | 989.65  | 4860.35 | 4.91118  |
|         |             |         |         |          | 0.000436028 | #DIV/0! | 1795.78 | #DIV/0!  |
|         |             |         |         |          | 0.000277196 | 1795.3  | 4626.2  | 2.57684  |
|         | 1.62736E-08 | 1671.07 | #DIV/0! | #DIV/0!  | 3.77536E-13 | 2827.15 | #DIV/0! | #DIV/0!  |
|         |             |         |         |          | 1.13127E-07 | 2883.25 | 6556.98 | 2.27416  |
| -2.1357 |             |         |         |          |             |         |         |          |
| -3.876  | 1.76992E-06 | 4441.33 | 1315.53 | -3.37609 |             |         |         |          |
|         |             |         |         |          | 0.000175815 | 2724.33 | 5959.35 | 2.18746  |
|         |             |         |         |          | 2.15049E-08 | 10637.6 | 30416   | 2.8593   |

|         |             |         |         |             |             |         |         |
|---------|-------------|---------|---------|-------------|-------------|---------|---------|
|         |             |         |         | 3.65495E-09 | 2760.65     | 9740.45 | 3.52832 |
|         |             |         |         | 9.08143E-12 | 2151.33     | 7236.23 | 3.36361 |
|         |             |         |         | 2.42104E-11 | 1524.9      | 8100.73 | 5.3123  |
|         |             |         |         | 7.43524E-05 | #DIV/0!     | 3701.1  | #DIV/0! |
|         | 2.35259E-05 | 1020.98 | 392.625 | -2.60038    |             |         |         |
|         | 2.23157E-05 | 9066.48 | 4178.78 | -2.16965    |             |         |         |
|         |             |         |         | 7.62875E-06 | #DIV/0!     | 1945.35 | #DIV/0! |
|         |             |         |         | 0.00632451  | 627.333     | #DIV/0! | #DIV/0! |
|         | 5.51493E-05 | 3053.45 | 1358.23 | -2.24812    |             |         |         |
|         |             |         |         | 3.51038E-12 | 5403.13     | 24510.3 | 4.53631 |
|         |             |         |         | 3.75935E-12 | 9827.73     | 45508.1 | 4.63059 |
|         | 1.01183E-06 | 2468.4  | 5563.43 | 2.25386     | 4.06486E-10 | 2087.25 | 6443    |
|         |             |         |         |             | 0.0101002   | 1506.8  | 677.725 |
|         |             |         |         |             | 6.95776E-12 | 1506.25 | 4307.68 |
|         |             |         |         |             | 1.03889E-07 | 2763.23 | 6597.18 |
|         | 1.13103E-08 | 2064.63 | 5276.88 | 2.55585     | 2.05808E-12 | 1306.37 | 4742.93 |
| 8.98231 | 3.07563E-15 | 5932.8  | 67650.3 | 11.4028     | 1.89418E-16 | 7532.65 | 83185.5 |
|         |             |         |         |             | 7.34117E-06 | 37735   | 83337.6 |
|         |             |         |         |             | 0.0166083   | 4520.4  | 918.7   |
|         | 0.00319903  | 763.875 | 301.6   | -2.53274    | 6.97609E-05 | 1432.98 | 415.3   |
|         |             |         |         |             | 0.00596056  | 1065    | 6350.75 |
|         | 0.00077251  | #DIV/0! | 28021.9 | #DIV/0!     | 0.00240066  | #DIV/0! | 26702.2 |
|         | 0.0105051   | #DIV/0! | 18407.1 | #DIV/0!     |             |         |         |
|         |             |         |         |             | 5.30081E-06 | 35795.9 | 80553.8 |
|         | 2.39866E-05 | 5392.23 | 12279.8 | 2.27732     |             |         |         |
|         |             |         |         |             | 3.06175E-07 | 74339.6 | 154029  |
|         |             |         |         |             | 7.99663E-08 | 53383.6 | 133771  |
|         |             |         |         |             | 1.55138E-09 | 23460   | 88623.5 |
|         | 0.000554508 | 701.9   | 269.025 | -2.60905    | 3.08367E-05 | 1598.7  | 438.467 |
| -2.9346 | 2.23275E-05 | 4407.45 | 1339.83 | -3.28957    |             |         |         |
|         |             |         |         |             | 8.16493E-06 | #DIV/0! | 5276.5  |
|         |             |         |         |             | 0.00137238  | #DIV/0! | 1692.73 |
|         | 3.37234E-06 | 2934.35 | 7223.43 | 2.46168     | 8.50571E-08 | 1747.43 | 5230.15 |
|         |             |         |         |             | 0.00442172  | #DIV/0! | 2191.98 |
|         | 2.13289E-06 | 3250.5  | 6594.63 | 2.0288      | 2.85329E-09 | 2513.65 | 6293.8  |
|         |             |         |         |             | 5.21504E-13 | 2551.8  | 8618.6  |
| 2.29915 | 2.74991E-05 | 1516.85 | 7678.53 | 5.06215     | 0.000794255 | #DIV/0! | 4487.55 |
|         |             |         |         |             | 0.000135421 | 2415.7  | 1048.4  |
|         |             |         |         |             | 1.12265E-07 | #DIV/0! | 5609.85 |
|         |             |         |         |             | 0.00877207  | 1128.1  | 398.3   |
|         |             |         |         |             | 0.00394827  | 1086.43 | 412.2   |
|         | 2.35272E-06 | 991.95  | 2136.05 | 2.15338     |             |         |         |
|         | 0.000251479 | 987.25  | 335.6   | -2.94175    | 0.00120645  | 1291.38 | 512.133 |
|         |             |         |         |             | 0.000293688 | 3231.83 | 736.325 |
|         | 2.98677E-07 | 21989.5 | 7355.28 | -2.98962    |             |         |         |
|         | 3.22495E-06 | 2210.65 | 895.3   | -2.46917    | 6.81402E-05 | 1960.3  | 967.625 |
| -2.5702 | 3.37925E-05 | 3221.45 | 1498.78 | -2.14939    | 5.79541E-06 | 2767.35 | 1077.15 |
|         |             |         |         |             | 0.00590603  | 1536.68 | 266.95  |
|         | 0.00155964  | 2801.43 | 1002.9  | -2.79333    | 0.00254847  | 3776.78 | 1046.65 |
|         |             |         |         |             | 5.49199E-07 | 31948.7 | 11416.2 |
|         | 9.65594E-07 | 18500.4 | 37496.1 | 2.02677     | 2.56166E-14 | 8077.98 | 38007.9 |
|         |             |         |         |             | 9.61457E-20 | 8890.6  | 42717.3 |
|         | 8.32858E-08 | 20716.1 | 42962.6 | 2.07387     | 2.29086E-16 | 8394.13 | 42523.3 |
|         | 3.63141E-07 | 17224.5 | 40961.3 | 2.37808     | 5.34135E-15 | 6845.2  | 35228.4 |
|         | 2.9877E-12  | 11515.6 | 23564   | 2.04627     | 2.93431E-18 | 8245.83 | 24589.4 |
|         | 5.40516E-14 | 7375.55 | 17839   | 2.41866     | 2.9174E-19  | 4700.68 | 16540.9 |
|         |             |         |         |             | 1.52915E-08 | 44466.1 | 18044.1 |
|         |             |         |         |             | 1.20209E-05 | 3143.03 | 6823.38 |
|         | 8.08747E-07 | 1110.45 | 473.533 | -2.34503    | 8.98656E-07 | 1658.35 | 487.9   |
|         |             |         |         |             | 3.243E-08   | 6537.5  | 14692   |
|         | 7.36107E-07 | 6657.45 | 13546.6 | 2.03481     | 1.92754E-07 | 5010.83 | 10531.3 |
| #DIV/0! |             |         |         |             |             |         |         |
|         |             |         |         |             | 9.29063E-09 | 3571.5  | 7712.45 |

|         |             |         |         |          |             |         |         |          |
|---------|-------------|---------|---------|----------|-------------|---------|---------|----------|
|         |             |         |         |          | 1.26697E-21 | 7022.25 | 35708.1 | 5.08499  |
|         |             |         |         |          | 7.22575E-08 | 4458.88 | 9433.23 | 2.11561  |
|         |             |         |         |          | 1.26981E-07 | 4760.48 | 11688.8 | 2.45539  |
|         |             |         |         |          | 5.27365E-07 | 4645.83 | 11569.3 | 2.49026  |
|         |             |         |         |          | 2.92816E-11 | 24223.6 | 54473.7 | 2.24879  |
|         |             |         |         |          | 4.02988E-06 | 1549.68 | 420.375 | -3.68641 |
|         |             |         |         |          | 3.15368E-05 | 1677.53 | 715.433 | -2.34478 |
| 2.13778 | 7.597E-08   | 1574.2  | 4329.15 | 2.75006  | 4.43074E-07 | 2133.88 | 5294.3  | 2.48107  |
| -2.0358 |             |         |         |          |             |         |         |          |
|         | 9.08256E-05 | 1602.55 | 545.55  | -2.93749 | 5.30074E-08 | 3785.93 | 899.15  | -4.21056 |
|         | 2.95437E-05 | 663.467 | 2333.48 | 3.51709  | 3.22078E-07 | #DIV/0! | 1885.65 | #DIV/0!  |
|         |             |         |         |          | 0.0010468   | #DIV/0! | 1704.43 | #DIV/0!  |
|         |             |         |         |          | 0.000641157 | 964.6   | 431.8   | -2.2339  |
|         |             |         |         |          | 1.87371E-05 | 3291.88 | 1552.25 | -2.12071 |
|         |             |         |         |          | 0.0218769   | #DIV/0! | 1322.55 | #DIV/0!  |
| 2.0092  |             |         |         |          |             |         |         |          |
|         |             |         |         |          | 0.000205368 | 1515.88 | 535.875 | -2.82878 |
|         |             |         |         |          | 0.00251141  | 1402.28 | 548.767 | -2.55532 |
|         |             |         |         |          | 5.20376E-05 | 1116.77 | #DIV/0! | #DIV/0!  |
|         |             |         |         |          | 0.00118449  | 1568.6  | 543.767 | -2.88469 |
|         |             |         |         |          | 2.53631E-06 | 4492.47 | #DIV/0! | #DIV/0!  |
|         |             |         |         |          | 0.000074161 | 2192.83 | #DIV/0! | #DIV/0!  |
|         |             |         |         |          | 7.79997E-10 | 2636.78 | 799.325 | -3.29875 |
| 5.46853 | 8.80583E-10 | 3665.83 | 41997.2 | 11.4564  | 4.30352E-13 | 3455.83 | 34702.3 | 10.0417  |
| 3.17801 | 1.62476E-12 | 7479.55 | 75322.4 | 10.0704  | 3.52656E-15 | 6823.25 | 87184.7 | 12.7776  |
| -7.1108 | 4.37656E-05 | 2048.4  | 192     | -10.6688 | 9.57777E-06 | 3608.2  | 401.967 | -8.97637 |
| #DIV/0! | 8.28749E-06 | 2740.1  | #DIV/0! | #DIV/0!  | 0.000711689 | 3593.33 | 645.9   | -5.56328 |
| -5.955  |             |         |         |          | 0.000813634 | 2794.65 | 537.55  | -5.19887 |
| 2.61774 | 2.74208E-09 | 1288.03 | 4493.38 | 3.48858  | 0.000020779 | 1801.68 | 3752.53 | 2.0828   |
|         |             |         |         |          | 0.000230179 | #DIV/0! | 4229.08 | #DIV/0!  |
|         |             |         |         |          | 0.0189194   | #DIV/0! | 1674.97 | #DIV/0!  |
|         | 4.24661E-06 | 3666.15 | 7782    | 2.12266  |             |         |         |          |
| 2.82103 | 4.68183E-11 | 1058.65 | 5762.6  | 5.44335  | 8.05122E-08 | 1447.1  | 4457.9  | 3.08057  |
|         | 0.000630716 | 2529.75 | 1025    | -2.46805 |             |         |         |          |
|         | 0.00120132  | 828.05  | 406.95  | -2.03477 | 0.000354798 | 1620.88 | 615.3   | -2.63428 |
|         |             |         |         |          | 3.73716E-05 | 2570.23 | 852.55  | -3.01475 |
|         |             |         |         |          | 2.95253E-05 | 534.9   | 1096.83 | 2.05052  |
|         | 1.27448E-09 | 2033.5  | 836.975 | -2.42958 |             |         |         |          |
|         | 5.94344E-08 | 1547.73 | 247.225 | -6.26039 | 0.000110245 | 1668.85 | 503.9   | -3.31187 |
|         | 0.000207484 | 663.425 | 233.167 | -2.84528 | 0.00043832  | 1173.55 | 462.575 | -2.53699 |
|         |             |         |         |          | 6.40167E-08 | 1964.5  | 4707.25 | 2.39616  |
|         |             |         |         |          | 1.52349E-07 | 720.8   | 1715.93 | 2.38058  |
|         |             |         |         |          | 2.62365E-08 | 1429.83 | 3777.1  | 2.64165  |
|         |             |         |         |          | 1.35194E-06 | 2976.95 | 1216.7  | -2.44674 |
|         | 0.000711507 | 1145.67 | 387.1   | -2.95961 |             |         |         |          |
|         |             |         |         |          | 1.1285E-06  | 13725.9 | 33284.7 | 2.42495  |
| 4.40105 | 8.40833E-12 | 8535.83 | 55602.9 | 6.51406  | 2.18546E-16 | 6184.88 | 90058.3 | 14.5611  |
|         |             |         |         |          | 3.27183E-06 | 2250.65 | 858.675 | -2.62107 |
|         |             |         |         |          | 0.0214524   | 1026.33 | 252.55  | -4.06388 |
| 2.99044 |             |         |         |          | 3.77318E-09 | 4271.05 | 48753   | 11.4148  |
|         | 4.94699E-08 | 1368.73 | 3318.15 | 2.42426  | 3.97115E-09 | 1295.13 | 3229.15 | 2.4933   |
| -2.4803 | 4.10372E-09 | 14894.5 | 2626.33 | -5.67124 | 1.06502E-10 | 11018.7 | 1611.48 | -6.83765 |
| -3.2733 |             |         |         |          | 1.31781E-08 | 4978.4  | 765.125 | -6.50665 |
|         |             |         |         |          | 0.000163183 | 1252    | 454.967 | -2.75185 |
|         |             |         |         |          | 4.95796E-07 | 2294.98 | 5911.05 | 2.57565  |
| 2.0669  | 2.90173E-09 | 10429.9 | 38684.4 | 3.70898  | 3.90865E-15 | 8854.2  | 72916.7 | 8.23527  |
|         |             |         |         |          | 2.59022E-08 | 3896.53 | 15462.3 | 3.96823  |
|         |             |         |         |          | 2.42863E-08 | 6195.68 | 25301.4 | 4.08372  |
| -2.9698 | 4.47512E-11 | 8838.15 | 2340.88 | -3.77558 | 5.77537E-15 | 12021.2 | 1968.1  | -6.108   |
| -2.7535 | 4.73903E-11 | 7005.6  | 1699.63 | -4.12185 | 1.58647E-14 | 9782.98 | 1698.55 | -5.7596  |
| -2.6205 | 5.43761E-10 | 8499.8  | 2566.15 | -3.31228 | 2.3743E-14  | 12416.1 | 2371.3  | -5.236   |
| -2.8007 | 1.93918E-08 | 6493.13 | 2054.08 | -3.16109 | 3.21168E-11 | 8635.68 | 2104.93 | -4.1026  |
|         |             |         |         |          | 3.91386E-06 | 2566.48 | 8591.5  | 3.34759  |



|         |             |         |         |          |             |         |         |          |  |
|---------|-------------|---------|---------|----------|-------------|---------|---------|----------|--|
|         |             |         |         |          | 1.96977E-13 | 8403.3  | 34608   | 4.11839  |  |
| -2.8503 | 6.3604E-10  | 2776.33 | 937.475 | -2.96149 | 8.82788E-09 | 4287.83 | 1640.45 | -2.61381 |  |
| -3.1242 | 1.7994E-08  | 4842.08 | 1467.88 | -3.2987  | 5.52593E-06 | 5512.75 | 2440.4  | -2.25895 |  |
|         | 0.000117976 | 1243.75 | 500.35  | -2.48576 |             |         |         |          |  |
|         |             |         |         |          | 0.00003447  | 1541.73 | 310.867 | -4.95944 |  |
|         |             |         |         |          | 2.13568E-07 | 2840.13 | 5773.55 | 2.03285  |  |
| -2.4381 | 1.54308E-08 | 1565.75 | 601.225 | -2.60427 | 2.33357E-07 | 1603.18 | 717.65  | -2.23392 |  |
| -2.5382 | 1.28046E-07 | 12518.3 | 4520.88 | -2.769   |             |         |         |          |  |
|         | 0.000911759 | 4935.5  | 2128.53 | -2.31874 |             |         |         |          |  |
| -2.4115 | 1.23689E-07 | 2394.68 | 903.75  | -2.64971 |             |         |         |          |  |
|         | 0.000484382 | 672.8   | 267.067 | -2.51922 |             |         |         |          |  |
|         |             |         |         |          | 9.83825E-05 | 1273.8  | 538.2   | -2.36678 |  |
|         |             |         |         |          | 0.000133318 | 1883.68 | 663.875 | -2.83739 |  |
|         |             |         |         |          | 6.00497E-05 | 1705.43 | 3688.78 | 2.16297  |  |
| -2.2782 | 1.64382E-08 | 11351.9 | 3515.98 | -3.22866 | 4.45155E-06 | 6460.48 | 3010.1  | -2.14627 |  |
|         | 0.000717011 | 1600.2  | 3757.03 | 2.34785  | 6.89433E-07 | #DIV/0! | 9421.88 | #DIV/0!  |  |
|         |             |         |         |          | 5.68659E-07 | 1759.78 | 5357.08 | 3.04418  |  |
|         |             |         |         |          | 0.00162647  | 3330.2  | 1561.93 | -2.13211 |  |
|         | 0.00247969  | 728.267 | #DIV/0! | #DIV/0!  |             |         |         |          |  |
|         | 0.00151903  | 604.567 | #DIV/0! | #DIV/0!  |             |         |         |          |  |
| 3.58778 | 9.21907E-10 | 2826.18 | 13624.9 | 4.82095  | 2.86262E-09 | 3491.1  | 8821.43 | 2.52683  |  |
| 3.78575 | 1.96377E-12 | 4597.4  | 26749.7 | 5.81844  | 3.90457E-12 | 4523.33 | 18313.6 | 4.0487   |  |
| 3.1257  | 1.16343E-06 | 1513.13 | 4833.43 | 3.19432  |             |         |         |          |  |
|         | 4.17418E-06 | 60202.5 | 26429   | -2.2779  |             |         |         |          |  |
|         | 1.90181E-06 | 739.825 | 213.25  | -3.46928 |             |         |         |          |  |
|         | 1.82764E-05 | 935.1   | 317.8   | -2.94242 | 6.05223E-08 | 1967.43 | 517.55  | -3.80142 |  |
|         | 0.0140122   | #DIV/0! | 843.4   | #DIV/0!  |             |         |         |          |  |
|         |             |         |         |          | 3.88051E-05 | 2872.65 | 1215.6  | -2.36315 |  |
| -2.5583 | 0.009508    | 56572.3 | 28095.7 | -2.01356 |             |         |         |          |  |
|         |             |         |         |          | 0.0200985   | 909.8   | 202.75  | -4.4873  |  |
|         |             |         |         |          | 0.00129442  | 2034.35 | 525.033 | -3.87471 |  |
|         |             |         |         |          | 0.000126815 | 1317.47 | 551.867 | -2.38729 |  |
|         | 0.000531642 | 751.8   | #DIV/0! | #DIV/0!  |             |         |         |          |  |
|         | 9.60142E-05 | 1108.47 | 320.6   | -3.45748 |             |         |         |          |  |
|         | 5.27223E-05 | 1207.38 | 488.8   | -2.47008 |             |         |         |          |  |
|         | 3.52701E-05 | 842.775 | #DIV/0! | #DIV/0!  |             |         |         |          |  |
|         | 1.91188E-05 | 1909.95 | 880.625 | -2.16886 | 6.00504E-08 | 2709.55 | 1045.78 | -2.59095 |  |
|         | 1.39785E-07 | 3986.48 | 8878.3  | 2.22711  | 3.87825E-11 | 2949.53 | 8910.48 | 3.02099  |  |
|         |             |         |         |          | 8.74719E-05 | 5248.45 | 11253.1 | 2.14407  |  |
|         |             |         |         |          | 3.86836E-07 | 1408.9  | 3430.18 | 2.43465  |  |
|         |             |         |         |          | 6.06868E-16 | 2642.5  | 11542.1 | 4.36786  |  |
|         |             |         |         |          | 1.02111E-15 | 4809    | 22714.3 | 4.72328  |  |
|         |             |         |         |          | 4.03429E-05 | #DIV/0! | 678.2   | #DIV/0!  |  |
|         |             |         |         |          | 0.000369418 | #DIV/0! | 2754.98 | #DIV/0!  |  |
|         |             |         |         |          | 3.44768E-12 | 10220.5 | 66379.9 | 6.49477  |  |
|         | 0.000569141 | 1618.1  | 549.275 | -2.94588 | 0.000247658 | 2996.45 | 884.475 | -3.38783 |  |
|         | 1.89535E-09 | 14556.7 | 51728.9 | 3.55361  | 3.23237E-08 | 12014.2 | 35709.8 | 2.97229  |  |
|         | 0.000141687 | 39768.5 | 98979.9 | 2.4889   | 2.77407E-11 | 16892.5 | 120614  | 7.14011  |  |
|         | 0.000134934 | 2898.08 | 707.933 | -4.09371 | 3.30284E-06 | 2372.03 | 812.3   | -2.92013 |  |
|         | 0.000223405 | 4694.53 | 755.5   | -6.2138  | 5.53387E-07 | 4496.53 | 485.75  | -9.25687 |  |
|         | 0.000014967 | 1618.18 | 246.15  | -6.57394 | 8.24716E-07 | 1822.98 | 413     | -4.41398 |  |
|         |             |         |         |          | 1.01503E-07 | 4096.7  | 545.2   | -7.51412 |  |
|         |             |         |         |          | 8.08676E-09 | 5303.13 | 843.3   | -6.28854 |  |
|         | 0.000194086 | 43845.9 | 7042.75 | -6.22567 | 1.40227E-08 | 16494.2 | 1708.7  | -9.65308 |  |
|         | 3.98602E-11 | 69169.9 | 16955.4 | -4.07953 | 1.45077E-14 | 24545.9 | 4035.58 | -6.08238 |  |
|         | 6.23716E-05 | 21868   | 7072.05 | -3.09217 | 3.95771E-07 | 7986.93 | 1696.43 | -4.70809 |  |
|         | 1.9708E-08  | 92579.2 | 25932.8 | -3.56996 | 4.09453E-13 | 55546.5 | 9016.23 | -6.16073 |  |
|         | 2.23358E-05 | 33042.9 | 10753.7 | -3.0727  | 5.58677E-08 | 18886.2 | 4223.83 | -4.47134 |  |
|         | 0.000185211 | 8570.7  | 2909.75 | -2.94551 | 1.79007E-09 | 6707.15 | 859.85  | -7.80037 |  |
|         | 1.81241E-05 | 5962.83 | 1691.27 | -3.52566 | 4.95405E-08 | 4165    | #DIV/0! | #DIV/0!  |  |
|         |             |         |         |          | 0.000908811 | 2525.03 | 618.8   | -4.08052 |  |
|         | 0.000845357 | 937.725 | 292.6   | -3.2048  | 0.000370076 | 2251.65 | 497.425 | -4.52661 |  |
|         |             |         |         |          | 0.00076841  | 2759.27 | 884.725 | -3.11878 |  |
|         |             |         |         |          | 0.00185515  | 3420.78 | 962.6   | -3.55368 |  |

|         |             |         |         |          |             |         |         |          |
|---------|-------------|---------|---------|----------|-------------|---------|---------|----------|
|         | 0.000435832 | 1576.15 | 427.575 | -3.68625 | 0.00324571  | 2428.28 | 719.125 | -3.37671 |
|         |             |         |         |          | 4.1644E-11  | 1745.98 | 4578.75 | 2.62246  |
|         |             |         |         |          | 0.000206554 | #DIV/0! | 2940.37 | #DIV/0!  |
|         |             |         |         |          | 0.00362344  | 1036.68 | 438.167 | -2.36594 |
|         |             |         |         |          | 1.08613E-11 | 32960.8 | 84617.7 | 2.56722  |
|         |             |         |         |          | 3.61632E-17 | 13436.5 | 55793.7 | 4.15239  |
|         |             |         |         |          | 2.09496E-08 | 1974.6  | 8510.65 | 4.31006  |
| 2.22214 | 3.23659E-11 | 18484.4 | 101028  | 5.46556  | 7.41834E-13 | 15709.6 | 87600.9 | 5.57626  |
|         |             |         |         |          | 1.18127E-11 | 5900.63 | 24435.3 | 4.14113  |
|         |             |         |         |          | 4.36645E-09 | 3943.75 | 16668.9 | 4.22667  |
|         |             |         |         |          | 1.00279E-05 | 2652.9  | 1155.7  | -2.29549 |
|         | 2.27047E-08 | 1041.48 | 363.475 | -2.86533 | 2.29973E-07 | 1812.13 | 642.2   | -2.82175 |
|         |             |         |         |          | 0.00904148  | 1617.43 | #DIV/0! | #DIV/0!  |
|         |             |         |         |          | 3.57846E-05 | 2513.53 | 623.6   | -4.03067 |
|         | 0.00546765  | 850.15  | 336.6   | -2.5257  | 1.62323E-06 | 2381.78 | 575.3   | -4.14006 |
|         | 0.00176299  | 609.525 | 251.8   | -2.42067 | 0.0157123   | 1259.68 | 558.55  | -2.25526 |
|         | 0.00487005  | 755.433 | #DIV/0! | #DIV/0!  |             |         |         |          |
|         |             |         |         |          | 8.7813E-08  | 5904.78 | 18135.4 | 3.07132  |
|         |             |         |         |          | 1.88388E-11 | 7501.6  | 27604   | 3.67974  |
|         |             |         |         |          | 0.00232197  | 1083.23 | #DIV/0! | #DIV/0!  |
|         | 7.91978E-08 | 904.625 | 182.5   | -4.95685 | 9.01476E-09 | 1732.8  | 381.5   | -4.54207 |
|         |             |         |         |          | 0.000162144 | 1522.4  | 696.45  | -2.18594 |
|         | 1.33136E-05 | 2575.2  | 1206.15 | -2.13506 | 1.63006E-08 | 6201.33 | 1921.28 | -3.22771 |
|         |             |         |         |          | 1.97379E-07 | 4056.8  | 1715.05 | -2.36541 |
|         |             |         |         |          | 0.000891085 | 2805.23 | #DIV/0! | #DIV/0!  |
|         |             |         |         |          | 0.00069639  | 8064.03 | 3061.1  | -2.63436 |
|         |             |         |         |          | 0.000500379 | 7368.63 | 3267.4  | -2.2552  |
|         |             |         |         |          | 0.00024224  | 2082.2  | #DIV/0! | #DIV/0!  |
|         |             |         |         |          | 5.8441E-07  | 3083.43 | 957.9   | -3.21895 |
| -4.1998 | 7.77061E-05 | 891.1   | 299.4   | -2.97629 | 1.62604E-05 | 1232.27 | 381.5   | -3.23006 |
|         | 0.00581881  | 1033.9  | #DIV/0! | #DIV/0!  |             |         |         |          |
|         |             |         |         |          | 1.01455E-07 | 7022.15 | 22301.2 | 3.17583  |
|         |             |         |         |          | 0.00205822  | 1246.73 | #DIV/0! | #DIV/0!  |
|         |             |         |         |          | 1.43821E-09 | 1826.28 | 4135.5  | 2.26445  |
|         |             |         |         |          | 1.11245E-08 | 5139.23 | 10485.5 | 2.04028  |
|         | 3.4722E-09  | 1422.78 | 494.15  | -2.87924 | 2.09249E-09 | 1729.13 | 626.85  | -2.75844 |
| -2.0756 |             |         |         |          | 0.000282454 | 2379.95 | 5106.8  | 2.14576  |
| -4.2427 | 1.22267E-07 | 912.475 | 296.175 | -3.08086 |             |         |         |          |
| -2.8486 | 5.00798E-05 | 1835.68 | 637.85  | -2.87791 |             |         |         |          |
|         | 1.20119E-05 | 593.933 | 207.725 | -2.85923 |             |         |         |          |
|         | 0.00527233  | 991.75  | 340.8   | -2.91006 |             |         |         |          |
|         |             |         |         |          | 1.64074E-14 | 4880.13 | 20811.1 | 4.26446  |
| -2.7941 | 3.46896E-08 | 4214.73 | 950.25  | -4.43539 |             |         |         |          |
|         |             |         |         |          | 0.00538792  | 1065.75 | 335.675 | -3.17495 |
|         | 0.0108994   | 2767.78 | 1196.7  | -2.31284 |             |         |         |          |
| 8.19715 | 2.742E-10   | 2217.03 | 38862.2 | 17.529   | 2.75875E-13 | 3241.75 | 41661.8 | 12.8516  |
| 2.9524  |             |         |         |          |             |         |         |          |
| 8.85175 |             |         |         |          |             |         |         |          |
| 2.43291 |             |         |         |          |             |         |         |          |
| 2.76091 |             |         |         |          |             |         |         |          |
|         |             |         |         |          | 7.92783E-11 | 2397.5  | 32711.1 | 13.6438  |
|         | 0.0030717   | 1496.58 | 4293.35 | 2.86878  | 3.84379E-10 | #DIV/0! | 5050.63 | #DIV/0!  |
|         |             |         |         |          | 2.10614E-13 | 3080.93 | 17990.5 | 5.83931  |
|         | 1.02029E-06 | 1675.98 | 14713.4 | 8.77898  | 1.31867E-08 | 1243.2  | 6923.23 | 5.56887  |
| 2.00577 | 9.55255E-12 | 4575.2  | 23378   | 5.10972  | 2.38435E-14 | 3154.43 | 18136.3 | 5.74945  |
| 2.09233 |             |         |         |          |             |         |         |          |
| 4.51038 |             |         |         |          |             |         |         |          |
|         | 0.0129067   | 1368.73 | 3325.53 | 2.42965  |             |         |         |          |
| 2.98542 | 3.5005E-06  | 6487.78 | 25804.3 | 3.97737  |             |         |         |          |
|         |             |         |         |          | 0.00029617  | 2002.23 | #DIV/0! | #DIV/0!  |

|         |             |         |         |          |             |         |         |          |
|---------|-------------|---------|---------|----------|-------------|---------|---------|----------|
|         |             |         |         |          | 7.09616E-08 | 5816.83 | 1148.28 | -5.06571 |
|         | 3.99418E-12 | 17008.8 | 47922.6 | 2.81753  | 2.19977E-18 | 9825.28 | 49668.5 | 5.05517  |
|         |             |         |         |          | 2.31465E-05 | #DIV/0! | 1538.1  | #DIV/0!  |
|         |             |         |         |          | 1.72455E-10 | 10389   | 1234.98 | -8.4123  |
|         | 0.000428894 | 3317.8  | 1200.3  | -2.76414 | 6.25387E-08 | 7842.7  | 1407.2  | -5.57327 |
|         |             |         |         |          | 1.26154E-09 | 43232.2 | 229718  | 5.31359  |
|         | 0.00547591  | 980.867 | 343.75  | -2.85343 |             |         |         |          |
|         | 2.34738E-05 | 1714.4  | 3475.63 | 2.02731  |             |         |         |          |
|         |             |         |         |          | 1.59753E-06 | 2054.7  | 574.9   | -3.57401 |
|         |             |         |         |          | 0.00363894  | 1564.7  | 290.4   | -5.38809 |
| -7.6694 | 5.26401E-11 | 8229.78 | 967.075 | -8.50997 | 3.55089E-10 | 3717.88 | #DIV/0! | #DIV/0!  |
|         | 2.60668E-10 | 1011.68 | 161.6   | -6.26037 | 0.000064815 | 1244.18 | 509.167 | -2.44355 |
| -3.4728 | 4.59907E-07 | 868.125 | 246.933 | -3.51563 |             |         |         |          |
|         | 0.00408375  | #DIV/0! | 653.75  | #DIV/0!  | 3.14347E-05 | #DIV/0! | 1316.53 | #DIV/0!  |
|         |             |         |         |          | 0.00218911  | 3088.4  | #DIV/0! | #DIV/0!  |
|         |             |         |         |          | 0.000174552 | 1150.38 | #DIV/0! | #DIV/0!  |
|         |             |         |         |          | 1.17167E-05 | 1600.75 | 3601.45 | 2.24985  |
|         |             |         |         |          | 8.9671E-08  | 2615.05 | 8544.75 | 3.26753  |
|         |             |         |         |          | 8.40363E-06 | #DIV/0! | 2195.1  | #DIV/0!  |
| 2.20721 | 3.76027E-09 | 2860.58 | 7306.15 | 2.55408  | 1.03239E-14 | 1778.4  | 6997.75 | 3.93486  |
|         |             |         |         |          | 2.69348E-05 | 3389.9  | 7480.55 | 2.20672  |
|         | 5.48327E-08 | 1149.58 | 354.6   | -3.24189 | 3.53774E-05 | 1603.23 | 587.075 | -2.73087 |
|         |             |         |         |          | 7.64239E-07 | 2645.83 | 912.05  | -2.90096 |
|         |             |         |         |          | 0.000808691 | 1088.77 | #DIV/0! | #DIV/0!  |
|         | 1.03007E-06 | 6987.5  | 17611.4 | 2.52042  | 5.58796E-09 | 3707.2  | 11022   | 2.97313  |
|         | 0.000850226 | 1257.23 | 2959.8  | 2.35423  | 2.45066E-05 | #DIV/0! | 1905.13 | #DIV/0!  |
|         | 0.000967609 | 1899.68 | 918.1   | -2.06914 |             |         |         |          |
|         |             |         |         |          | 0.000778441 | 1538.65 | 637.75  | -2.41262 |
|         | 1.86515E-05 | 1883.25 | 6998.13 | 3.71598  | 0.000006395 | 1209.35 | 4969.75 | 4.10944  |
|         | 6.96851E-06 | 9994.63 | 26567.7 | 2.6582   | 4.12675E-10 | 4332.15 | 18481.2 | 4.26606  |
|         | 5.27556E-08 | 3924.35 | 16185   | 4.12424  | 5.27322E-10 | 2703.7  | 12569.7 | 4.64907  |
| 2.89277 |             |         |         |          |             |         |         |          |
|         | 0.000146181 | 857.733 | 380.9   | -2.25186 |             |         |         |          |
|         | 8.92904E-07 | 1618.53 | 634.533 | -2.55073 |             |         |         |          |
|         | 0.000335116 | 2706.48 | 1220.58 | -2.21738 |             |         |         |          |
|         |             |         |         |          | 0.000395358 | 1342.78 | 652.75  | -2.0571  |
|         |             |         |         |          | 0.0229225   | 1228.43 | 405.2   | -3.03165 |
|         |             |         |         |          | 0.000365519 | 1088.03 | #DIV/0! | #DIV/0!  |
|         | 3.51522E-06 | 610.933 | 2291.2  | 3.75033  | 6.97429E-06 | #DIV/0! | 1474.73 | #DIV/0!  |
|         |             |         |         |          | 3.65426E-05 | 396.2   | 1737.3  | 4.38491  |
|         | 0.00298965  | 1706.43 | 6757.85 | 3.96024  | 1.29001E-05 | 1257.35 | 9020.5  | 7.17422  |
|         |             |         |         |          | 8.6115E-07  | 1770.38 | 441.175 | -4.01286 |
|         |             |         |         |          | 4.81976E-06 | 2225.53 | 814.175 | -2.73347 |
|         | 0.000170121 | 756.025 | 349.575 | -2.1627  |             |         |         |          |
|         |             |         |         |          | 1.78467E-08 | 1707.8  | 826.633 | -2.06597 |
|         |             |         |         |          | 4.27504E-07 | 1246.5  | 512.25  | -2.43338 |
|         | 2.33168E-06 | 748.3   | 339.933 | -2.20131 | 4.53861E-06 | 1117.97 | 482.1   | -2.31895 |
|         |             |         |         |          | 0.0118291   | 3582.58 | 679.9   | -5.26927 |
| -2.1151 | 7.64396E-05 | 1185.73 | 365.8   | -3.24148 |             |         |         |          |
|         | 1.14451E-07 | 1558.65 | 399.733 | -3.89922 |             |         |         |          |
|         |             |         |         |          | 2.23839E-06 | 3760.78 | 8929.15 | 2.37428  |
|         |             |         |         |          | 9.43948E-13 | 9845.73 | 25203.1 | 2.5598   |
|         |             |         |         |          | 5.41414E-13 | 6821.5  | 18609.6 | 2.72808  |
| -2.952  | 9.217E-10   | 2348.08 | 583.175 | -4.02636 | 8.38243E-15 | 3281.13 | 495.65  | -6.61986 |
|         |             |         |         |          | 0.000692757 | 4419.98 | 1126.45 | -3.92381 |
|         |             |         |         |          | 2.22809E-09 | 322935  | 144717  | -2.23149 |
|         |             |         |         |          | 1.1469E-09  | 261802  | 125618  | -2.08411 |
| 2.76094 | 4.12402E-05 | 6837.55 | 31280.6 | 4.57483  | 7.19163E-08 | 4538.05 | 32243.2 | 7.10508  |
|         |             |         |         |          | 0.00294937  | #DIV/0! | 2940.3  | #DIV/0!  |
| 4.54165 | 3.31033E-11 | 3221.05 | 30251.8 | 9.3919   | 8.40402E-12 | 3450.5  | 25977.2 | 7.52854  |
| 4.15656 | 1.74784E-06 | #DIV/0! | 2451.15 | #DIV/0!  | 0.00019115  | #DIV/0! | 1989.2  | #DIV/0!  |
| 4.44796 | 2.08599E-08 | #DIV/0! | 15735.1 | #DIV/0!  | 5.29745E-09 | #DIV/0! | 13411.6 | #DIV/0!  |

|         |             |         |         |          |             |         |         |          |
|---------|-------------|---------|---------|----------|-------------|---------|---------|----------|
| 3.82893 | 2.52726E-09 | 803.925 | 4215.98 | 5.24424  |             |         |         |          |
| -2.5466 |             |         |         |          |             |         |         |          |
|         |             |         |         |          | 1.31001E-10 | 5104.48 | 18609   | 3.64563  |
| 2.25025 | 1.70888E-08 | 5978.65 | 14907.4 | 2.49343  | 1.25684E-09 | 5720.73 | 14455.3 | 2.52682  |
|         |             |         |         |          | 1.75098E-10 | 24474.6 | 71457.9 | 2.91968  |
| 2.48903 | 1.71569E-10 | 3957.3  | 17411.1 | 4.39973  | 4.54252E-12 | 4347.9  | 17193.3 | 3.9544   |
| 2.70648 |             |         |         |          |             |         |         |          |
|         |             |         |         |          | 4.47152E-07 | 2601.73 | #DIV/0! | #DIV/0!  |
| -2.1746 |             |         |         |          | 5.18193E-06 | 5627.6  | 11535.7 | 2.04984  |
|         |             |         |         |          | 4.58309E-12 | 9835.1  | 36968.6 | 3.75884  |
|         |             |         |         |          | 0.00096214  | 1036.05 | 500.733 | -2.06907 |
|         |             |         |         |          | 0.000455676 | 14362.6 | 31284   | 2.17816  |
|         | 0.00604396  | 34833.3 | 9132.13 | -3.81437 | 6.45539E-05 | 21596.2 | 2764.4  | -7.81226 |
|         |             |         |         |          | 2.88428E-08 | 8399.58 | 20828.1 | 2.47966  |
|         |             |         |         |          | 6.93343E-10 | 8749.23 | 31211.8 | 3.56738  |
|         |             |         |         |          | 5.68164E-07 | 2449.78 | 5379.83 | 2.19605  |
|         |             |         |         |          | 5.57703E-10 | 1891.7  | 4929.9  | 2.60607  |
| -2.0277 |             |         |         |          |             |         |         |          |
|         |             |         |         |          | 9.73409E-05 | 2561.35 | 871.6   | -2.93868 |
|         | 1.00825E-06 | 2779.03 | 528.85  | -5.25485 | 4.88738E-05 | 1441    | 353.25  | -4.07926 |
|         |             |         |         |          | 8.59664E-06 | #DIV/0! | 2773.7  | #DIV/0!  |
|         |             |         |         |          | 0.000136227 | #DIV/0! | 2122.45 | #DIV/0!  |
| -2.4546 |             |         |         |          |             |         |         |          |
|         | 1.70675E-12 | 4609.15 | 12109.9 | 2.62736  | 4.47734E-15 | 2976.3  | 9612    | 3.22951  |
|         | 2.72563E-10 | 2124.73 | 6645.45 | 3.12768  | 3.32711E-13 | 1372.9  | 4756.85 | 3.46482  |
|         | 1.47827E-11 | 3543    | 11142.3 | 3.14488  | 1.39949E-13 | 2430.93 | 8456.68 | 3.47879  |
|         |             |         |         |          | 7.50155E-06 | 1857.57 | #DIV/0! | #DIV/0!  |
|         |             |         |         |          | 0.000476637 | 1107.33 | 492.625 | -2.24782 |
|         |             |         |         |          | 0.000562327 | #DIV/0! | 1679.73 | #DIV/0!  |
|         | 9.35095E-10 | 5288.43 | 531.55  | -9.94906 | 4.99323E-12 | 7518.2  | 662.7   | -11.3448 |
|         | 1.2975E-06  | 2002.75 | 202.8   | -9.87549 | 2.06285E-09 | 2673.38 | #DIV/0! | #DIV/0!  |
|         | 4.46413E-08 | 2194.45 | 213.05  | -10.3002 |             |         |         |          |
|         | 4.15379E-05 | 821.425 | 266.033 | -3.08768 | 8.27589E-05 | 1395.83 | 494.967 | -2.82004 |
|         |             |         |         |          | 0.000231495 | 827.6   | #DIV/0! | #DIV/0!  |
|         |             |         |         |          | 3.85373E-06 | 4416.03 | 1870.25 | -2.3612  |
|         |             |         |         |          | 1.33884E-06 | 8861.53 | 3920.4  | -2.26036 |
|         |             |         |         |          | 8.88045E-05 | 6056.63 | 2651.65 | -2.2841  |
|         | 0.00155755  | 1184.03 | 545.433 | -2.1708  |             |         |         |          |
| -2.341  | 0.00172466  | 804.225 | 348.525 | -2.30751 |             |         |         |          |
|         |             |         |         |          | 8.68037E-05 | 879.333 | 357.75  | -2.45795 |
| 2.30406 |             |         |         |          |             |         |         |          |
|         |             |         |         |          | 6.28248E-07 | 2595.85 | 807.433 | -3.21494 |
|         |             |         |         |          | 0.0082705   | 998.9   | 285.9   | -3.49388 |
|         |             |         |         |          | 0.000254338 | 807.367 | #DIV/0! | #DIV/0!  |
|         | 8.95685E-05 | 1118.2  | 305.1   | -3.66503 | 1.85376E-05 | 1900.78 | 509.375 | -3.73158 |
|         |             |         |         |          | 0.00126871  | 1868.5  | 547.65  | -3.41185 |
|         | 0.000102752 | 527.633 | #DIV/0! | #DIV/0!  |             |         |         |          |
|         | 0.000414036 | 977.5   | 383.05  | -2.55189 | 7.99425E-07 | 2977.85 | 730.975 | -4.07381 |
|         | 0.00169399  | 1538.63 | 4084.88 | 2.65489  | 1.71713E-09 | 1804.8  | 8785.85 | 4.86805  |
|         |             |         |         |          | 7.00728E-13 | 1407    | 12183.8 | 8.65942  |
|         |             |         |         |          | 1.9373E-10  | 728.3   | 6942.35 | 9.53227  |
|         | 3.34244E-06 | 2637.2  | 941.375 | -2.80143 |             |         |         |          |
|         | 3.48262E-08 | 620.05  | 4315.93 | 6.96061  | 4.40472E-06 | 492.1   | 1463.68 | 2.97434  |
|         | 0.00633832  | 50462.6 | 103048  | 2.04207  | 4.62514E-10 | 20951.9 | 112795  | 5.38353  |
|         | 4.6318E-06  | 20766.5 | 60168.6 | 2.89738  | 8.57252E-14 | 6747.85 | 49118.4 | 7.27912  |
|         | 5.28183E-06 | 23899.5 | 70633.9 | 2.95546  | 2.14587E-14 | 6701.68 | 60306.1 | 8.99866  |
|         |             |         |         |          | 0.000326712 | 2347.85 | 5502.8  | 2.34376  |
|         |             |         |         |          | 1.10303E-05 | 1830.5  | 5413.98 | 2.95765  |
|         |             |         |         |          | 7.22189E-06 | 3445.48 | 7033    | 2.04123  |
|         |             |         |         |          | 1.2452E-10  | 9238    | 23044.8 | 2.49457  |
|         |             |         |         |          | 8.93589E-10 | 17781.3 | 45807.1 | 2.57614  |
|         | 7.95092E-07 | 2352.4  | 1146.3  | -2.05217 | 1.0726E-12  | 4404.05 | 1184    | -3.71964 |
|         |             |         |         |          | 0.0139284   | 1350.7  | 497.8   | -2.71334 |

|         |             |         |         |          |             |         |         |          |
|---------|-------------|---------|---------|----------|-------------|---------|---------|----------|
|         |             |         |         |          | 1.71132E-08 | 4029.2  | 8170.78 | 2.02789  |
|         | 6.34914E-12 | 2693.58 | 7874.68 | 2.9235   | 8.17299E-15 | 1747.97 | 5720.08 | 3.27242  |
|         | 3.16074E-13 | 4240.1  | 10990.9 | 2.59214  | 7.55402E-17 | 2702.5  | 9742.63 | 3.60504  |
|         | 5.80457E-12 | 3568.1  | 10249.8 | 2.87261  | 2.61561E-15 | 2232.05 | 8666.23 | 3.88263  |
|         | 1.93764E-06 | 13023.1 | 28153.3 | 2.1618   | 2.3553E-13  | 5139.75 | 18221.7 | 3.54526  |
|         | 4.30002E-05 | 14221.6 | 28732.6 | 2.02035  | 1.16351E-11 | 5318.08 | 20147.6 | 3.78852  |
|         |             |         |         |          | 1.58313E-06 | 2757.13 | 1263.5  | -2.18213 |
| 3.18013 | 2.84043E-10 | 3256.95 | 15134.6 | 4.64687  | 8.96794E-08 | 2762.45 | 8109.6  | 2.93565  |
|         | 4.22949E-08 | 8268.9  | 25460.4 | 3.07906  | 1.93921E-11 | 3689.58 | 15257.8 | 4.13538  |
| 2.80066 | 1.34389E-13 | 13666.3 | 82183.4 | 6.01358  | 1.00838E-17 | 10027.1 | 90139   | 8.98951  |
|         |             |         |         |          | 9.36139E-11 | 6004.43 | 20471.5 | 3.40941  |
|         |             |         |         |          | 2.27294E-08 | 1112.9  | 4084.78 | 3.67039  |
|         |             |         |         |          | 9.81662E-10 | 4475.1  | 18111.1 | 4.04708  |
|         | 0.000483843 | 1194.5  | 502.075 | -2.37913 |             |         |         |          |
|         |             |         |         |          | 0.000243153 | 1311.4  | 2962.4  | 2.25896  |
|         | 1.32446E-08 | 11239.2 | 31791.7 | 2.82864  | 3.94731E-13 | 7916.3  | 32131.4 | 4.05889  |
| 2.17915 | 5.66042E-07 | 2852.7  | 12699.7 | 4.45182  | 2.14579E-12 | 1644.25 | 10933.3 | 6.6494   |
| 2.23996 | 9.24113E-09 | 12089.2 | 37380.4 | 3.09206  | 4.47698E-16 | 5029.35 | 42601.5 | 8.47057  |
|         | 2.39382E-08 | 1835.33 | 5462    | 2.97603  | 2.89588E-10 | #DIV/0! | 5906.48 | #DIV/0!  |
| 3.3912  | 1.58363E-05 | #DIV/0! | 2989.9  | #DIV/0!  | 2.34195E-05 | #DIV/0! | 3117.45 | #DIV/0!  |
| #DIV/0! |             |         |         |          | 0.00433347  | #DIV/0! | 1040.68 | #DIV/0!  |
|         | 8.74134E-06 | #DIV/0! | 530.6   | #DIV/0!  |             |         |         |          |
| 3.47807 |             |         |         |          |             |         |         |          |
| #DIV/0! |             |         |         |          |             |         |         |          |
|         | 0.00125857  | 2636.58 | 6852.38 | 2.59897  | 8.20385E-08 | 1991.7  | 5077.33 | 2.54924  |
|         |             |         |         |          | 1.40142E-10 | 2928.98 | 9980.23 | 3.40741  |
|         | 2.49201E-07 | 7903.98 | 17386.8 | 2.19975  | 1.62461E-13 | 3814.98 | 14544.7 | 3.81253  |
|         |             |         |         |          | 4.97085E-06 | #DIV/0! | 4441.3  | #DIV/0!  |
| 3.09931 | 4.95194E-09 | 1719.8  | 6288.98 | 3.65681  | 8.27262E-09 | 1697.25 | 4012.33 | 2.36402  |
| 2.46505 | 9.13776E-11 | 5035.93 | 17077   | 3.39103  | 5.59185E-11 | 3450.23 | 11058.9 | 3.20527  |
|         | 0.000454578 | 2114.38 | 4778.78 | 2.26014  | 0.000270602 | 1985.4  | 4479.35 | 2.25614  |
| 3.28873 | 0.000805905 | 772.825 | 2512.8  | 3.25145  |             |         |         |          |
| 2.19306 | 1.0701E-07  | 5905.88 | 25127.9 | 4.25473  | 3.87343E-11 | 6970.5  | 24783.6 | 3.55549  |
|         |             |         |         |          | 2.47293E-10 | 5435.58 | 13796.6 | 2.5382   |
|         | 4.02671E-06 | 10268.6 | 20606.4 | 2.00675  | 6.90148E-11 | 5416.45 | 14820.9 | 2.73627  |
|         |             |         |         |          | 4.18937E-06 | #DIV/0! | 12027.4 | #DIV/0!  |
|         |             |         |         |          | 0.0131177   | #DIV/0! | 2118.08 | #DIV/0!  |
|         | 3.03886E-07 | 6332.38 | 13296.1 | 2.0997   | 8.91851E-10 | 4458.18 | 11800.9 | 2.64701  |
|         | 1.82654E-06 | 17058.7 | 38599.4 | 2.26275  | 1.02145E-11 | 10917.8 | 39910.2 | 3.65553  |
|         | 1.83022E-05 | 950.5   | 2182.38 | 2.29603  | 3.48014E-05 | #DIV/0! | 2290.07 | #DIV/0!  |
|         | 6.93667E-05 | 10777.4 | 4281.2  | -2.51738 |             |         |         |          |
|         |             |         |         |          | 6.76816E-11 | 5242.3  | 10625.8 | 2.02693  |
|         | 8.77756E-09 | 5918.93 | 13215.5 | 2.23276  | 7.16518E-11 | 3944.88 | 10184.7 | 2.58176  |
|         | 2.35808E-06 | 3069.55 | 6714.95 | 2.1876   |             |         |         |          |
|         |             |         |         |          | 0.00067294  | 1270.95 | 604.2   | -2.10353 |
|         |             |         |         |          | 0.00626077  | #DIV/0! | 660.7   | #DIV/0!  |
|         |             |         |         |          | 1.85874E-05 | 853.325 | 218.15  | -3.91164 |
|         | 0.000149315 | 2208.8  | 1091.33 | -2.02396 | 2.83707E-05 | 3281.5  | 1501.88 | -2.18494 |
|         | 0.000508278 | 834.325 | 322.375 | -2.58806 | 4.19658E-05 | 1606.58 | 469.225 | -3.42389 |
|         | 2.3411E-06  | 1267.68 | 600.9   | -2.10963 | 5.11697E-11 | 2555.6  | 780.15  | -3.27578 |
|         |             |         |         |          | 2.13818E-05 | 1365.63 | 560.4   | -2.43689 |
|         |             |         |         |          | 3.3747E-16  | 8374.4  | 30297.4 | 3.61785  |
|         | 5.23238E-08 | 5802.85 | 18782.6 | 3.23679  | 1.62756E-11 | 3952.53 | 17551.6 | 4.4406   |
| 2.19937 | 2.03131E-07 | 1412.9  | 6132.58 | 4.34042  | 4.71744E-13 | #DIV/0! | 6006.65 | #DIV/0!  |
|         |             |         |         |          | 0.000162222 | 785.875 | 257.267 | -3.05471 |
|         |             |         |         |          | 0.00137313  | #DIV/0! | 1905.03 | #DIV/0!  |
|         |             |         |         |          | 1.47386E-05 | 2213.75 | 691.6   | -3.20091 |
|         | 0.000232073 | 1702.95 | 5701.43 | 3.34797  | 0.000624578 | 788.75  | 2217.88 | 2.81189  |
| 2.3787  | 3.4601E-06  | 10084.7 | 25950   | 2.57322  | 6.75426E-10 | 4661.05 | 18144.9 | 3.89288  |
|         |             |         |         |          | 5.67887E-12 | 7393.03 | 34235.6 | 4.6308   |
|         |             |         |         |          | 1.26831E-05 | 6497.03 | 2021.55 | -3.21388 |
|         | 0.0155759   | 849.633 | #DIV/0! | #DIV/0!  |             |         |         |          |

|         |             |         |         |          |             |         |         |          |
|---------|-------------|---------|---------|----------|-------------|---------|---------|----------|
|         |             |         |         |          | 4.44291E-05 | 3594.93 | 750.4   | -4.79068 |
| -3.1998 | 3.05927E-05 | 2066.63 | 671.55  | -3.0774  |             |         |         |          |
|         |             |         |         |          | 0.000755836 | 2649.88 | 691.733 | -3.83078 |
|         | 0.000975777 | 739.4   | 254.25  | -2.90816 | 5.34616E-05 | 2034.75 | 622.533 | -3.2685  |
| -2.9445 | 0.000162138 | 9965.9  | 3774.83 | -2.6401  | 7.93258E-05 | 3765.18 | 1592.8  | -2.36387 |
| -2.8277 | 0.000982502 | 5390.2  | 2380.1  | -2.26469 | 0.000225623 | 2709.4  | 1156.2  | -2.34337 |
|         |             |         |         |          | 0.00193108  | #DIV/0! | 1855.58 | #DIV/0!  |
|         |             |         |         |          | 0.00727054  | 3092.43 | 803.1   | -3.85061 |
| -2.1846 |             |         |         |          |             |         |         |          |
|         | 4.52644E-07 | 15967.4 | 34096.1 | 2.13535  | 2.99124E-13 | 6171.9  | 24316.1 | 3.9398   |
|         | 6.44076E-05 | 9651    | 20996.9 | 2.17562  | 3.63603E-12 | 2944.93 | 13686.2 | 4.64738  |
| #DIV/0! |             |         |         |          |             |         |         |          |
|         |             |         |         |          | 0.0007319   | 3787.23 | 721.1   | -5.25201 |
|         |             |         |         |          | 0.00609703  | 997.8   | 372.7   | -2.67722 |
|         |             |         |         |          | 3.17896E-06 | 2510.88 | 942.075 | -2.66526 |
|         | 0.00497758  | 623.4   | 1284.58 | 2.0606   | 2.68418E-08 | #DIV/0! | 1877.88 | #DIV/0!  |
|         |             |         |         |          | 3.22263E-09 | 2064.23 | 5818.58 | 2.81877  |
|         | 7.67632E-07 | 8092.58 | 19185.3 | 2.37073  | 1.07202E-15 | 4674.85 | 33136.8 | 7.08832  |
|         |             |         |         |          | 1.17424E-07 | #DIV/0! | 1624.5  | #DIV/0!  |
|         | 9.60447E-06 | 2705.9  | 1278.15 | -2.11704 |             |         |         |          |
|         | 7.63837E-05 | 2662.73 | 1099.3  | -2.4222  |             |         |         |          |
|         | 3.19825E-09 | 1235.75 | 332.2   | -3.7199  | 9.94719E-13 | 3644.4  | 599.35  | -6.08059 |
|         |             |         |         |          | 9.36238E-05 | 2763.83 | 1055.2  | -2.61925 |
|         |             |         |         |          | 0.000135496 | 3575.8  | 1737.53 | -2.05798 |
| -3.5319 | 0.000016662 | 718.275 | 295.7   | -2.42907 |             |         |         |          |
| -4.6874 |             |         |         |          |             |         |         |          |
|         |             |         |         |          | 0.00993801  | #DIV/0! | 3950.98 | #DIV/0!  |
|         | 1.57331E-07 | 2138.43 | 858.867 | -2.48983 | 1.42962E-06 | 3612.05 | 1658.83 | -2.17748 |
|         |             |         |         |          | 1.76541E-15 | 7692.67 | 27737.4 | 3.6057   |
|         |             |         |         |          | 0.0110626   | 1660.3  | 509.567 | -3.25826 |
| -2.288  | 3.52991E-06 | 996.4   | 468.8   | -2.12543 |             |         |         |          |
|         |             |         |         |          | 2.93136E-05 | 1597.78 | 3737.08 | 2.33892  |
|         |             |         |         |          | 4.40817E-10 | 4298.33 | 13861.3 | 3.2248   |
|         |             |         |         |          | 2.76766E-08 | 3890.13 | 8245.43 | 2.11958  |
|         | 4.80196E-07 | 1026.95 | 2562.23 | 2.49499  | 6.55236E-08 | #DIV/0! | 1926.38 | #DIV/0!  |
|         |             |         |         |          | 6.65252E-12 | 11045.8 | 35837.4 | 3.24445  |
|         | 0.000105798 | 3307.6  | 1590.05 | -2.08019 |             |         |         |          |
|         |             |         |         |          | 6.77911E-07 | 797.8   | 1790    | 2.24367  |
|         |             |         |         |          | 3.44142E-06 | #DIV/0! | 3223    | #DIV/0!  |
|         | 0.0126561   | 649.425 | 1583.5  | 2.43831  |             |         |         |          |
| -2.1962 |             |         |         |          |             |         |         |          |
|         | 1.71787E-08 | 3889.73 | 8413.75 | 2.16307  | 2.66186E-12 | 2869.9  | 9223.93 | 3.21402  |
|         |             |         |         |          | 5.90757E-09 | 3152.35 | 9131.28 | 2.89666  |
|         |             |         |         |          | 0.000219684 | 2490.75 | 1108.85 | -2.24625 |
|         | 0.000168688 | 855.525 | 298.95  | -2.86177 | 0.00334242  | 1085.27 | 404.2   | -2.68497 |
|         |             |         |         |          | 0.0168144   | 1135.07 | 502.925 | -2.25693 |
|         |             |         |         |          | 0.00753808  | #DIV/0! | 1622.78 | #DIV/0!  |
|         | 0.000105296 | 2596.45 | 1252.68 | -2.07272 | 2.65348E-05 | 5270.03 | 2444.95 | -2.15547 |
|         | 1.13094E-06 | 1596.65 | 3371.23 | 2.11144  | 5.76315E-09 | 1275.2  | 2624.35 | 2.05799  |
|         |             |         |         |          | 5.30162E-11 | 7030.98 | 20791.5 | 2.95713  |
|         | 0.000170163 | 2575.43 | 1080.83 | -2.38284 |             |         |         |          |
|         |             |         |         |          | 7.72505E-05 | 3514.38 | 817.3   | -4.29998 |
|         | 3.92409E-06 | 1327.37 | 501.1   | -2.64891 | 3.68016E-07 | 1833.38 | 532     | -3.44619 |
|         | 1.99052E-07 | 1378.78 | 470.775 | -2.92873 | 2.74709E-07 | 2357.55 | 891.225 | -2.64529 |
|         | 0.00172856  | 1794.03 | 718.033 | -2.49854 |             |         |         |          |
| -3.4201 |             |         |         |          |             |         |         |          |
|         |             |         |         |          | 2.35073E-05 | 1038.5  | #DIV/0! | #DIV/0!  |
|         |             |         |         |          | 1.1214E-10  | #DIV/0! | 4641.28 | #DIV/0!  |
|         |             |         |         |          | 1.1305E-09  | 2503.03 | 6795.38 | 2.71487  |
|         | 0.000164256 | 1343.77 | 3453.28 | 2.56985  | 2.67172E-09 | #DIV/0! | 2082.08 | #DIV/0!  |
|         | 0.011855    | 567.633 | 214.9   | -2.64138 |             |         |         |          |
|         | 0.000169653 | 1268.95 | 456.5   | -2.77974 | 0.000273041 | 1869.73 | 736.075 | -2.54013 |

|         |             |         |         |          |             |         |         |          |
|---------|-------------|---------|---------|----------|-------------|---------|---------|----------|
|         | 2.72343E-06 | 1130.63 | 280.233 | -4.03458 | 0.0133206   | 1401.37 | 620.325 | -2.25908 |
|         |             |         |         |          | 0.00400812  | 1938.43 | 941.6   | -2.05865 |
|         | 2.48517E-06 | 566.95  | #DIV/0! | #DIV/0!  |             |         |         |          |
|         | 0.000170042 | 780.25  | 258.825 | -3.01459 | 0.00122261  | 1105.23 | 453.475 | -2.43723 |
|         |             |         |         |          | 0.00337734  | 5678.33 | 2646    | -2.146   |
|         |             |         |         |          | 0.000158827 | 1940.43 | 704.133 | -2.75576 |
|         |             |         |         |          | 4.28411E-05 | 4456.9  | 2028.83 | -2.19679 |
|         |             |         |         |          | 0.0034959   | 2104.5  | 607.65  | -3.46334 |
|         | 0.00369497  | 666.575 | #DIV/0! | #DIV/0!  |             |         |         |          |
|         | 2.66581E-10 | 6220.75 | 17123   | 2.75255  | 2.32564E-17 | 3371    | 18990.9 | 5.63361  |
| -2.3785 | 4.59382E-05 | 1843.78 | 882.9   | -2.08832 |             |         |         |          |
|         | 0.00922813  | #DIV/0! | 915.133 | #DIV/0!  | 2.72551E-05 | #DIV/0! | 2194.55 | #DIV/0!  |
|         |             |         |         |          | 5.24478E-10 | 2954.23 | 6190.53 | 2.09548  |
|         |             |         |         |          | 4.67544E-09 | 1415.6  | 4029.1  | 2.84621  |
|         | 4.2898E-08  | 4952.95 | 16030.6 | 3.23658  | 3.64224E-14 | 1793.8  | 9739.78 | 5.42969  |
|         | 0.000203271 | #DIV/0! | 859     | #DIV/0!  | 1.27679E-06 | #DIV/0! | 713.467 | #DIV/0!  |
|         |             |         |         |          | 1.18728E-08 | #DIV/0! | 3255.08 | #DIV/0!  |
|         |             |         |         |          | 0.000323811 | 2856.55 | 807.767 | -3.53636 |
|         |             |         |         |          | 2.11471E-07 | 2290.18 | 745.55  | -3.07179 |
|         | 7.84191E-05 | 1537.5  | #DIV/0! | #DIV/0!  |             |         |         |          |
|         |             |         |         |          | 1.81032E-07 | 5686.33 | 12350.1 | 2.17189  |
|         |             |         |         |          | 1.46657E-06 | 7835.63 | 17881.2 | 2.28203  |
|         |             |         |         |          | 1.44665E-07 | 5650.35 | 14619.5 | 2.58737  |
|         |             |         |         |          | 1.08088E-05 | 2418.7  | 463.925 | -5.21356 |
|         | 0.00302426  | 617.75  | 308.375 | -2.00324 | 0.00402719  | 1450.6  | 423.05  | -3.42891 |
|         | 6.52235E-05 | 955.333 | #DIV/0! | #DIV/0!  | 3.41937E-09 | 1771.05 | 639.433 | -2.76972 |
|         |             |         |         |          | 0.000745804 | 1349.73 | 500.05  | -2.69918 |
|         | 5.10228E-06 | 304     | 1567.28 | 5.15551  | 2.06514E-09 | #DIV/0! | 990.05  | #DIV/0!  |
|         |             |         |         |          | 0.000992716 | #DIV/0! | 2249.85 | #DIV/0!  |
|         | 3.17866E-09 | 1245    | 3541.88 | 2.84488  |             |         |         |          |
|         | 1.78619E-09 | 3884.28 | 10468.7 | 2.69514  | 2.49612E-13 | 3039.97 | 11547.2 | 3.79846  |
|         | 9.79078E-07 | 1796.15 | 690.175 | -2.60246 | 6.34243E-06 | 2527.43 | 1045.05 | -2.41847 |
|         |             |         |         |          | 0.00298581  | 8797.3  | 4322.25 | -2.03535 |
|         |             |         |         |          | 0.00608924  | 7508.88 | 3707.45 | -2.02535 |
|         | 4.40121E-05 | 17063.5 | 35093.8 | 2.05666  | 1.35895E-08 | 9248.3  | 34068.8 | 3.68379  |
|         | 1.13065E-06 | 892.725 | 385.933 | -2.31316 | 2.66444E-09 | 1125.3  | #DIV/0! | #DIV/0!  |
|         | 0.00209293  | 830.067 | 181.6   | -4.57085 |             |         |         |          |
|         | 0.0102969   | 1537.3  | 328.5   | -4.67976 |             |         |         |          |
|         | 1.95475E-08 | 1824.7  | 889     | -2.05253 | 6.25866E-13 | 3373.15 | 1134.58 | -2.97305 |
|         |             |         |         |          | 3.10238E-08 | 2476.45 | 999.575 | -2.4775  |
|         |             |         |         |          | 2.66014E-06 | 2044.37 | 1008.1  | -2.02794 |
|         | 0.00005852  | 612.375 | 235.55  | -2.59977 | 3.38382E-05 | 1348.1  | 525.3   | -2.56634 |
|         | 0.00645686  | 701.633 | 232.9   | -3.01259 |             |         |         |          |
|         | 0.00136798  | 1119.23 | 442.25  | -2.53077 | 7.28592E-06 | 3300.38 | #DIV/0! | #DIV/0!  |
|         | 0.00470837  | 3092.35 | 11072.3 | 3.58054  | 0.00142927  | 4901.93 | 19427.6 | 3.96325  |
|         | 0.00128954  | 3719.18 | 14438.5 | 3.88216  | 4.65826E-05 | 4887.03 | 25521.5 | 5.22229  |
|         | 0.000830859 | 3420.7  | 12947.9 | 3.78517  | 1.34078E-05 | 4179.88 | 23354.8 | 5.58743  |
| -2.2709 | 2.79714E-05 | 4134.55 | 1616.3  | -2.55803 |             |         |         |          |
|         | 0.000128117 | 1436.13 | 562.4   | -2.55358 |             |         |         |          |
|         |             |         |         |          | 6.20765E-05 | 7479.03 | 1362.3  | -5.49    |
|         |             |         |         |          | 1.47676E-05 | 2162.68 | 416.25  | -5.19562 |
|         |             |         |         |          | 0.0015924   | 3020.38 | 6810.28 | 2.25478  |
|         |             |         |         |          | 0.0179057   | #DIV/0! | 1181.28 | #DIV/0!  |
|         |             |         |         |          | 0.0128357   | #DIV/0! | 1304.2  | #DIV/0!  |
|         |             |         |         |          | 1.43393E-05 | 1923.33 | 3985.65 | 2.07227  |
|         |             |         |         |          | 1.78652E-05 | 668.7   | 1617.05 | 2.4182   |
|         |             |         |         |          | 6.81786E-07 | #DIV/0! | 2145.3  | #DIV/0!  |
|         |             |         |         |          | 0.00100932  | 818.8   | 231.95  | -3.53007 |
|         |             |         |         |          | 2.55482E-05 | 7119.5  | 2057.73 | -3.45989 |

|         |             |         |         |          |             |         |         |          |
|---------|-------------|---------|---------|----------|-------------|---------|---------|----------|
|         | 4.70576E-07 | 2776.3  | 6317.68 | 2.27557  | 1.64851E-09 | 2297.13 | 6358.25 | 2.76792  |
|         |             |         |         |          | 0.000132827 | 1794.7  | 458.675 | -3.91279 |
|         | 0.0095724   | 1516.2  | 623.95  | -2.43    | 5.31009E-05 | 3758.35 | 1102.35 | -3.4094  |
| 3.06791 | 1.66364E-09 | 1055.2  | 4233.98 | 4.01249  | 8.135E-10   | 1049.83 | 4122.35 | 3.92667  |
|         | 8.70448E-06 | 2199.68 | 954.733 | -2.30397 | 6.42387E-06 | 3593.03 | 1556.38 | -2.30859 |
|         | 0.000147514 | 640.175 | 288.633 | -2.21795 | 5.28793E-07 | 1290.08 | 389.267 | -3.31412 |
|         | 4.46101E-06 | 519.6   | 161.9   | -3.20939 | 9.53291E-06 | 747.325 | 251.667 | -2.9695  |
|         |             |         |         |          | 0.000726068 | 1013.05 | 491     | -2.06324 |
|         |             |         |         |          | 0.000471612 | 1013.03 | #DIV/0! | #DIV/0!  |
| 3.05467 | 8.08355E-08 | 559.225 | 2332.03 | 4.1701   | 9.78047E-05 | 792     | 1880.78 | 2.37472  |
|         | 0.000770458 | 1165.35 | 2332.65 | 2.00167  |             |         |         |          |
| -2.2044 | 5.90898E-09 | 2803.08 | 1028.07 | -2.72655 |             |         |         |          |
|         | 0.00175464  | 2197.18 | 1083.13 | -2.02855 |             |         |         |          |
|         |             |         |         |          | 4.58331E-05 | 886.425 | 1773.78 | 2.00104  |
|         |             |         |         |          | 0.00338754  | 1913.3  | 756.2   | -2.53015 |
|         | 6.05756E-11 | 6855.8  | 19872   | 2.89857  | 7.82319E-13 | 3470.73 | 12683   | 3.65428  |
|         |             |         |         |          | 0.00251255  | 1604.13 | 789.25  | -2.03247 |
|         | 0.000256632 | 692.533 | 229.1   | -3.02284 |             |         |         |          |
|         |             |         |         |          | 0.000802547 | 1168.33 | 487.8   | -2.39509 |
|         |             |         |         |          | 0.0154019   | #DIV/0! | 1348.3  | #DIV/0!  |
|         | 0.0113936   | 618.067 | 173.533 | -3.56166 | 2.05993E-06 | 1138.9  | 332.7   | -3.4232  |
|         | 3.60096E-05 | 653.775 | 253.2   | -2.58205 |             |         |         |          |
|         | 0.00101533  | 847.967 | #DIV/0! | #DIV/0!  |             |         |         |          |
|         |             |         |         |          | 0.000148874 | 3148.3  | 668.85  | -4.70703 |
|         |             |         |         |          | 0.0122717   | 1455.08 | 463.6   | -3.13864 |
|         | 0.00674957  | 655.55  | 240.267 | -2.72843 | 0.000226387 | 1231.85 | 446.1   | -2.76138 |
|         |             |         |         |          | 2.45434E-06 | 12964   | 26038.2 | 2.00849  |
| -2.4238 | 1.22372E-06 | 7189.38 | 3178.65 | -2.26177 |             |         |         |          |
| -2.2952 | 2.18026E-05 | 3555.3  | 1635.73 | -2.17353 |             |         |         |          |
|         |             |         |         |          | 4.57585E-11 | 2210.53 | 6714.1  | 3.03733  |
|         |             |         |         |          | 2.21168E-05 | 1861.05 | 434.8   | -4.28024 |
|         |             |         |         |          | 8.43723E-07 | 1323.15 | 427.6   | -3.09436 |
|         |             |         |         |          | 0.0217535   | 1060.43 | 332     | -3.19405 |
|         |             |         |         |          | 0.00889465  | 1442.68 | 412.7   | -3.4957  |
|         |             |         |         |          | 0.0103728   | 1183.95 | 314.3   | -3.76694 |
|         | 0.000355461 | 965.8   | 213.5   | -4.52365 | 0.000216757 | 1609.03 | 381.075 | -4.22233 |
| -2.7678 |             |         |         |          |             |         |         |          |
|         | 0.000024512 | 771.133 | #DIV/0! | #DIV/0!  |             |         |         |          |
|         | 0.000633622 | 697.9   | 198.7   | -3.51233 | 0.00167479  | 1226    | 594.133 | -2.06351 |
|         | 8.99509E-10 | 1628    | 625.3   | -2.60355 | 1.36263E-11 | 2808.23 | 920.65  | -3.05027 |
|         |             |         |         |          | 4.27601E-10 | 2653.6  | 1098.65 | -2.41533 |
|         |             |         |         |          | 0.000407861 | 1756.7  | 440.25  | -3.99023 |
|         |             |         |         |          | 0.000485726 | 1234.03 | 445.3   | -2.77122 |
|         | 0.00102376  | 1120.18 | 375.85  | -2.98038 | 3.01482E-05 | 2984.38 | 828.125 | -3.60377 |
|         |             |         |         |          | 9.06652E-05 | 721.233 | #DIV/0! | #DIV/0!  |
| 2.19483 |             |         |         |          |             |         |         |          |
|         |             |         |         |          | 1.07051E-09 | 9221.2  | 21942.8 | 2.3796   |
|         |             |         |         |          | 0.0114749   | #DIV/0! | 2043.23 | #DIV/0!  |
|         | 0.0141327   | 560.7   | 257     | -2.18171 | 0.0109011   | 1378.17 | 413.55  | -3.33253 |
|         |             |         |         |          | 0.00130531  | 1755.93 | 665.1   | -2.6401  |
|         | 0.00830293  | 1054.1  | 2305.4  | 2.18708  | 2.47931E-06 | 730.75  | 2589.08 | 3.54304  |
| -6.6255 | 3.26754E-12 | 4734.3  | 567.8   | -8.33797 | 1.29747E-09 | 7481.58 | 1118.35 | -6.68983 |
|         |             |         |         |          | 1.67554E-11 | 1483    | 4175.8  | 2.81578  |
|         | 0.00146181  | 545.925 | 1146.65 | 2.10038  | 1.25248E-09 | #DIV/0! | 1131.05 | #DIV/0!  |
| 15.635  | 4.44822E-15 | 1293.95 | 28362   | 21.9189  | 2.8595E-13  | 2321.7  | 25893.2 | 11.1527  |
| -3.1288 | 5.98674E-11 | 10689.3 | 2667.28 | -4.00756 |             |         |         |          |
| -2.613  | 0.000289679 | 1722.7  | 489.9   | -3.51643 |             |         |         |          |
|         |             |         |         |          | 1.31054E-06 | 2267.98 | 5191.5  | 2.28905  |
|         | 4.87777E-05 | 2569.23 | 5590.98 | 2.17613  | 2.31716E-07 | #DIV/0! | 3583.35 | #DIV/0!  |
|         | 0.000825218 | 546.625 | 1212.43 | 2.21802  |             |         |         |          |
|         |             |         |         |          | 5.99277E-10 | 13274.9 | 33786.4 | 2.54513  |
|         |             |         |         |          | 3.48335E-09 | 3588.08 | 10057.2 | 2.80295  |



|         |             |         |         |          |             |         |         |          |
|---------|-------------|---------|---------|----------|-------------|---------|---------|----------|
|         |             |         |         |          | 3.94079E-09 | 12282.7 | 36206.4 | 2.94776  |
|         |             |         |         |          | 1.11858E-10 | 5625.35 | 17916.3 | 3.18492  |
|         | 0.00367971  | 542.333 | 181.8   | -2.98313 | 0.00172191  | 1259.4  | 265.1   | -4.75066 |
|         | 2.93171E-07 | 927.2   | 414.033 | -2.23943 | 1.19011E-06 | 1747.55 | 663.65  | -2.63324 |
|         | 1.15663E-06 | 809.75  | #DIV/0! | #DIV/0!  | 1.05762E-05 | 1206.45 | 478.6   | -2.52079 |
|         | 0.000085019 | 664.633 | 179.4   | -3.70476 |             |         |         |          |
|         |             |         |         |          | 1.73279E-06 | 2431.5  | 5656.13 | 2.32619  |
|         | 0.0104658   | 668.5   | #DIV/0! | #DIV/0!  | 0.00458275  | 1425.8  | 460.75  | -3.09452 |
|         | 0.0056859   | 1998.18 | #DIV/0! | #DIV/0!  |             |         |         |          |
| -2.4008 | 2.62408E-06 | 985.35  | 310.025 | -3.17829 | 6.26684E-08 | 1576.58 | 388.25  | -4.06072 |
|         |             |         |         |          | 1.67073E-05 | 1996    | 913.2   | -2.18572 |
|         |             |         |         |          | 3.34782E-15 | 3397.45 | 19017   | 5.59744  |
|         | 5.39214E-09 | 6093.95 | 16697.1 | 2.73995  | 3.92255E-14 | 3063.28 | 12774.2 | 4.1701   |
|         |             |         |         |          | 2.53296E-12 | 3143.9  | 13172.9 | 4.18998  |
|         | 4.83884E-10 | 5869.35 | 17209.1 | 2.93202  | 2.13629E-15 | 2837.88 | 13915.6 | 4.90351  |
|         | 0.010129    | 892.9   | 1903.83 | 2.13218  |             |         |         |          |
|         |             |         |         |          | 0.000184713 | 2895.85 | 9368.43 | 3.23512  |
|         |             |         |         |          | 0.00333551  | #DIV/0! | 1160.08 | #DIV/0!  |
|         |             |         |         |          | 0.00362736  | #DIV/0! | 4092.4  | #DIV/0!  |
| -2.5594 | 1.63582E-07 | 2630.1  | 1148.43 | -2.29018 |             |         |         |          |
|         | 2.9009E-07  | 999     | 374.8   | -2.66542 | 1.28314E-05 | 1478.08 | 641.85  | -2.30284 |
|         |             |         |         |          | 1.77828E-07 | 2377.17 | 1104    | -2.15323 |
|         |             |         |         |          | 0.00827383  | 1008.95 | 333.6   | -3.02443 |
|         |             |         |         |          | 0.00819265  | 5461    | 1943.33 | -2.81012 |
|         |             |         |         |          | 3.67177E-05 | 2220.28 | 504.9   | -4.39745 |
|         |             |         |         |          | 0.000621369 | 854.05  | 240.4   | -3.55262 |
|         |             |         |         |          | 0.000529476 | 3680.08 | 835.3   | -4.40569 |
|         |             |         |         |          | 0.00301712  | 5720.88 | 1462.57 | -3.91153 |
|         |             |         |         |          | 3.32423E-05 | 5790.23 | 1813.6  | -3.19267 |
|         | 0.000090636 | 980.967 | #DIV/0! | #DIV/0!  |             |         |         |          |
|         | 7.55396E-08 | 3334.85 | 8075.45 | 2.42153  | 1.65336E-08 | 2786.6  | 5630.1  | 2.02042  |
|         | 3.32056E-08 | 1825.78 | 4645.1  | 2.54418  | 7.2477E-08  | 1176.63 | 2726.45 | 2.31718  |
|         | 1.16664E-10 | 2112.2  | 5854.05 | 2.77154  | 1.42587E-12 | 1176.17 | 3621.25 | 3.07886  |
|         | 1.53418E-05 | 3065.88 | 1440.43 | -2.12845 | 2.47398E-09 | 2936.08 | 938.75  | -3.12764 |
|         |             |         |         |          | 2.32857E-06 | 2450.3  | 1041.53 | -2.35261 |
|         |             |         |         |          | 1.13778E-09 | 5414.58 | 12884.5 | 2.3796   |
|         | 0.000538398 | 2114.25 | 5234.28 | 2.47571  | 2.06258E-08 | #DIV/0! | 3039.43 | #DIV/0!  |
|         | 3.5958E-06  | 1301.58 | 374.1   | -3.47922 | 2.93868E-06 | 3393.6  | 1054.77 | -3.21739 |
| -2.2208 | 7.0686E-10  | 4888.53 | 1429.53 | -3.41968 | 4.81423E-10 | 4938.43 | 1563.65 | -3.15827 |
|         | 6.4753E-07  | 35950.8 | 15190.9 | -2.36661 |             |         |         |          |
| -2.152  | 3.16623E-08 | 12950.3 | 5922.28 | -2.1867  |             |         |         |          |
| -2.7529 |             |         |         |          |             |         |         |          |
|         | 0.00198296  | 538.975 | #DIV/0! | #DIV/0!  |             |         |         |          |
|         | 2.26954E-05 | 2910.75 | 1132.6  | -2.56997 | 3.85045E-09 | 7878.55 | 2046.6  | -3.84958 |
|         | 1.82107E-05 | 1323.18 | 578.425 | -2.28755 | 0.000180825 | 1586.85 | 712.367 | -2.22757 |
|         |             |         |         |          | 0.0115988   | 1493.37 | 612.45  | -2.43835 |
| #DIV/0! |             |         |         |          |             |         |         |          |
|         |             |         |         |          | 0.001135    | 2200.2  | 974.25  | -2.25835 |
|         |             |         |         |          | 6.64939E-07 | 3757.33 | 7993.78 | 2.12752  |
|         |             |         |         |          | 0.000293642 | 1129.03 | 561.775 | -2.00975 |
|         |             |         |         |          | 2.26156E-07 | 3931.4  | 8302.08 | 2.11174  |
|         | 0.00612898  | 880.75  | 409.9   | -2.14869 | 0.00456162  | 1291.77 | 435.3   | -2.96753 |
|         | 0.000124217 | 532.75  | 189.8   | -2.8069  |             |         |         |          |
|         |             |         |         |          | 0.00261828  | 824.167 | 233.4   | -3.53113 |
|         |             |         |         |          | 5.21507E-05 | 3499.95 | 7442.05 | 2.12633  |
| 2.50039 | 0.000267    | 1466.58 | 3001.48 | 2.04659  | 3.00396E-07 | 961.9   | 2465.4  | 2.56305  |
|         | 0.000508315 | #DIV/0! | 1606.33 | #DIV/0!  |             |         |         |          |
|         |             |         |         |          | 2.60068E-06 | 3115.68 | 1372.65 | -2.26982 |
| 8.38328 | 5.92066E-09 | #DIV/0! | 7960.38 | #DIV/0!  | 9.75646E-10 | #DIV/0! | 10538   | #DIV/0!  |
|         |             |         |         |          | 0.000599958 | 836.2   | 272.367 | -3.07013 |
|         |             |         |         |          | 3.75457E-11 | 12083.2 | 27785.1 | 2.29948  |
|         |             |         |         |          | 2.44121E-06 | 2544    | 7026.43 | 2.76196  |



|         |             |         |         |          |             |         |         |          |
|---------|-------------|---------|---------|----------|-------------|---------|---------|----------|
|         |             |         |         |          | 2.44104E-10 | 4748.93 | 13322.1 | 2.80529  |
|         |             |         |         |          | 1.90245E-10 | 2074.35 | 6427.6  | 3.09861  |
|         |             |         |         |          | 1.74871E-10 | 9714.98 | 30954.8 | 3.18629  |
|         |             |         |         |          | 1.89196E-13 | 4490.93 | 14583.5 | 3.24733  |
|         | 0.000167309 | 1008.25 | 264.5   | -3.81191 | 0.00278244  | 1147.35 | 284.9   | -4.0272  |
|         |             |         |         |          | 2.58449E-06 | 4251.35 | 8570.4  | 2.01592  |
|         | 0.00196582  | 676.267 | 294.25  | -2.29827 | 0.000854672 | 1086.73 | 400.067 | -2.71638 |
|         |             |         |         |          | 8.23056E-06 | 1588.98 | #DIV/0! | #DIV/0!  |
|         | 0.000158327 | 764.167 | 3322.15 | 4.34742  | 2.44599E-05 | 1381.3  | 5918.4  | 4.28466  |
| 2.10063 |             |         |         |          |             |         |         |          |
| -2.2306 |             |         |         |          |             |         |         |          |
|         | 4.73142E-09 | 8524.6  | 20851.3 | 2.44602  | 2.89218E-08 | 4447.43 | 9569.25 | 2.15164  |
| 2.20684 | 2.79354E-07 | 2061.3  | 6629.43 | 3.21614  | 1.77227E-09 | 1328.7  | 3699.2  | 2.78407  |
|         |             |         |         |          |             |         |         |          |
| 4.48743 | 9.88781E-10 | 6724.5  | 34019.1 | 5.05898  | 4.47493E-08 | 6546.05 | 23367.9 | 3.56977  |
| 3.74998 | 5.84265E-11 | 4111.9  | 24082.6 | 5.85681  | 1.25822E-10 | 4031.18 | 20274.8 | 5.0295   |
| 6.64149 | 0.0114842   | 546.675 | 1190.05 | 2.17689  |             |         |         |          |
| 3.08941 |             |         |         |          |             |         |         |          |
| 4.00067 | 2.37989E-05 | 592     | 2049.95 | 3.46275  |             |         |         |          |
|         |             |         |         |          | 1.31258E-10 | 1238.43 | 3213.75 | 2.59503  |
|         | 3.81337E-06 | 1389.78 | 586     | -2.37163 |             |         |         |          |
|         |             |         |         |          |             |         |         |          |
|         |             |         |         |          | 1.78083E-05 | 8248.23 | 902.8   | -9.13627 |
|         |             |         |         |          | 9.38477E-07 | 53606   | 126403  | 2.35801  |
|         |             |         |         |          | 5.31223E-08 | 31662.8 | 85737.3 | 2.70782  |
|         |             |         |         |          | 7.05736E-06 | 1607.8  | 3482.3  | 2.16588  |
|         |             |         |         |          | 1.72181E-10 | 10817.3 | 25815.6 | 2.38651  |
|         |             |         |         |          |             |         |         |          |
|         | 0.000999887 | 1002.03 | 362.5   | -2.76423 | 7.27253E-06 | 5912.93 | 13671.1 | 2.31207  |
|         |             |         |         |          | 0.000130396 | 2177.53 | 1011.58 | -2.15261 |
|         |             |         |         |          | 0.00137687  | 754.7   | 313.6   | -2.40657 |
|         |             |         |         |          | 0.0138194   | #DIV/0! | 601.5   | #DIV/0!  |
|         |             |         |         |          |             |         |         |          |
|         | 0.00281069  | 894.033 | 269.9   | -3.31246 |             |         |         |          |
|         | 0.00678077  | 953.55  | 411.567 | -2.31688 |             |         |         |          |
|         | 0.00131981  | 4873.9  | 2337.15 | -2.0854  |             |         |         |          |
|         | 2.18846E-06 | 2902.03 | 6443.45 | 2.22033  | 4.8509E-09  | 2357.08 | 6770.3  | 2.87233  |
|         |             |         |         |          | 3.46098E-13 | 8864.15 | 28388.7 | 3.20264  |
|         | 0.00216342  | #DIV/0! | 2253.17 | #DIV/0!  | 0.0041071   | #DIV/0! | 2639.35 | #DIV/0!  |
| -2.1959 |             |         |         |          |             |         |         |          |
|         |             |         |         |          | 0.00303228  | #DIV/0! | 523.767 | #DIV/0!  |
|         |             |         |         |          | 0.000651873 | #DIV/0! | 751.1   | #DIV/0!  |
|         | 1.10945E-06 | 14305   | 1725.8  | -8.28888 | 3.0981E-09  | 11611.6 | 773.9   | -15.004  |
|         |             |         |         |          | 2.37457E-06 | #DIV/0! | 5928.8  | #DIV/0!  |
|         | 0.01262     | #DIV/0! | 1233.35 | #DIV/0!  |             |         |         |          |
|         |             |         |         |          | 0.0169375   | 1174.88 | 316.7   | -3.70974 |
|         | 0.000134365 | 778.225 | 225.967 | -3.44398 | 2.9231E-06  | 1411.7  | 476.4   | -2.96327 |
|         |             |         |         |          | 0.00641263  | 2260.35 | 500.667 | -4.51468 |
|         | 3.97362E-08 | 5111.43 | 15853.7 | 3.10162  | 4.07086E-09 | 2259    | 6846.05 | 3.03057  |
|         | 0.00587171  | 584.367 | 179.7   | -3.2519  |             |         |         |          |
|         | 0.00013554  | 951.4   | 147.2   | -6.46332 |             |         |         |          |
|         | 0.0112301   | 519.775 | 142.85  | -3.63861 | 0.0112884   | 1065.43 | 383.5   | -2.77818 |
|         |             |         |         |          | 0.000353255 | 3484.2  | 669.9   | -5.20107 |
|         | 0.00469196  | 648.55  | 229.567 | -2.82511 | 0.000899221 | 1847.73 | 531.867 | -3.47404 |
|         |             |         |         |          | 0.0106176   | 2845.08 | #DIV/0! | #DIV/0!  |
|         |             |         |         |          | 0.0204736   | 1400.97 | 460.425 | -3.04277 |
|         |             |         |         |          | 0.000452653 | 910.475 | 317.625 | -2.86651 |
|         |             |         |         |          | 0.00517221  | 1076.38 | 505.425 | -2.12964 |
|         |             |         |         |          | 0.0071605   | #DIV/0! | 785.675 | #DIV/0!  |
|         | 0.000794239 | 780.275 | 379.433 | -2.05642 |             |         |         |          |
|         | 0.000167745 | 2228.15 | 829.125 | -2.68735 |             |         |         |          |

|         |             |         |         |          |             |         |         |          |  |
|---------|-------------|---------|---------|----------|-------------|---------|---------|----------|--|
| -2.7944 | 1.32999E-08 | 4593.15 | 1875.5  | -2.44903 |             |         |         |          |  |
|         | 5.48867E-11 | 4186.43 | 1082.37 | -3.86784 | 2.70482E-09 | 3881.18 | 1292.38 | -3.00313 |  |
|         | 0.000688556 | 1283.13 | #DIV/0! | #DIV/0!  | 0.00293601  | 2827.5  | 670.2   | -4.21889 |  |
|         |             |         |         |          | 0.0044399   | 644.35  | #DIV/0! | #DIV/0!  |  |
|         |             |         |         |          | 3.43458E-12 | 7053.53 | 14416.7 | 2.0439   |  |
|         |             |         |         |          | 4.96332E-11 | 7281.68 | 16123.1 | 2.2142   |  |
|         |             |         |         |          | 0.00530336  | 1645.7  | 418.75  | -3.93003 |  |
|         | 1.71476E-07 | 1839.58 | 783.3   | -2.34849 | 4.63623E-06 | 2109    | 565.575 | -3.72895 |  |
|         | 2.45172E-05 | 1017.23 | 304.85  | -3.3368  | 0.000144881 | 1440.7  | 407.05  | -3.53937 |  |
|         | 4.38811E-05 | 39132.1 | 17068.3 | -2.29267 | 9.01152E-05 | 78795.5 | 34744.9 | -2.26783 |  |
|         | 0.0105272   | 859.067 | 213.7   | -4.01997 | 0.000637575 | 1961.33 | #DIV/0! | #DIV/0!  |  |
|         |             |         |         |          | 2.33301E-08 | 9006.05 | 25058.6 | 2.78242  |  |
|         |             |         |         |          | 9.98121E-13 | 11080.2 | 39691.9 | 3.58223  |  |
|         |             |         |         |          | 8.1255E-12  | 3093.73 | 11644   | 3.76376  |  |
|         |             |         |         |          | 2.50796E-10 | 3878.48 | 14866   | 3.83296  |  |
|         |             |         |         |          | 0.00232498  | 1004.97 | 413.733 | -2.42902 |  |
| 2.85592 |             |         |         |          | 1.43923E-11 | 879.375 | 4812    | 5.47207  |  |
|         | 1.20521E-05 | 1523.1  | 575.333 | -2.64733 | 0.00540204  | 1488.5  | 583.95  | -2.54902 |  |
| 16.27   | 4.18155E-08 | 628.1   | 6017.15 | 9.57992  | 7.49869E-10 | 1316.6  | 11842.1 | 8.99447  |  |
|         | 0.000361677 | 1698.17 | 591.4   | -2.87144 | 1.75257E-17 | 1362.1  | 5923.38 | 4.34871  |  |
|         |             |         |         |          | 0.0198395   | #DIV/0! | 1113.6  | #DIV/0!  |  |
|         |             |         |         |          | 6.5882E-08  | 1417.73 | 253.325 | -5.59647 |  |
|         |             |         |         |          | 0.00021752  | 1295.25 | 645.967 | -2.00513 |  |
|         | 0.000358838 | 900.333 | 282.8   | -3.18364 | 4.33053E-06 | 2016.08 | 683.567 | -2.94935 |  |
|         |             |         |         |          | 2.6209E-08  | 7667.03 | 3501.78 | -2.18947 |  |
|         |             |         |         |          | 5.46814E-05 | 1724.27 | 805.4   | -2.14088 |  |
|         | 4.33974E-07 | 824.7   | 282.5   | -2.91929 | 0.00162615  | 4468.78 | 1720.63 | -2.59718 |  |
|         | 0.000294019 | 733.775 | 319.925 | -2.29358 | 5.02683E-05 | 3323.5  | 1329.33 | -2.50014 |  |
|         | 9.38142E-05 | 2672.48 | 740.525 | -3.60889 | 4.99407E-05 | 4142.75 | 1665.8  | -2.48694 |  |
|         |             |         |         |          | 0.0057522   | 867     | 327.3   | -2.64895 |  |
|         | 1.81452E-05 | 1713.23 | 600.667 | -2.85221 | 0.000144538 | 2403.03 | 843.1   | -2.85023 |  |
|         |             |         |         |          | 0.000530544 | 1724.83 | 849     | -2.0316  |  |
| -2.0337 | 0.000996696 | 944.667 | 371.667 | -2.5417  | 2.57892E-11 | 5919.13 | 1947.78 | -3.03892 |  |
|         |             |         |         |          | 4.31472E-08 | 4826.83 | 1894.25 | -2.54815 |  |
|         |             |         |         |          | 1.12794E-05 | 2629.33 | 1146.5  | -2.29336 |  |
|         |             |         |         |          | 5.69647E-06 | 1346.9  | 672.2   | -2.00372 |  |
|         | 0.000291749 | 1037.93 | 351.875 | -2.9497  | 0.0016799   | 1613.63 | 745.15  | -2.1655  |  |
|         | 0.000016852 | 805.425 | 368.467 | -2.18588 | 3.10077E-08 | 1799.8  | 555.475 | -3.24011 |  |
|         | 4.34627E-06 | 1157.4  | 490.633 | -2.35899 | 7.59912E-08 | 1317.7  | 651.55  | -2.02241 |  |
|         | 2.49176E-09 | 1093.88 | 402.6   | -2.71703 | 1.56362E-05 | 1887    | 608.7   | -3.10005 |  |
|         | 0.000157883 | 1261.93 | #DIV/0! | #DIV/0!  | 0.00377492  | 2105.15 | 865.833 | -2.43136 |  |
| 5.05729 | 0.000781574 | 4540.03 | 1135.3  | -3.99897 | 8.79414E-06 | 13627.7 | 2349.3  | -5.80076 |  |
|         |             |         |         |          | 4.80944E-05 | 1932.8  | 424.6   | -4.55205 |  |
|         |             |         |         |          | 0.000158692 | 1132.23 | 193.8   | -5.84228 |  |
| -2.2338 | 2.24593E-08 | 1536.45 | 573.375 | -2.67966 | 8.15962E-06 | 1526.03 | 3182.4  | 2.08541  |  |
|         | 0.00482177  | 555.767 | #DIV/0! | #DIV/0!  | 0.00312867  | 2520.13 | 665.55  | -3.78653 |  |
|         | 0.000160828 | 810.95  | 229.95  | -3.52664 | 0.000104265 | 1891.23 | 676.3   | -2.79644 |  |
|         | 1.68994E-06 | 984.225 | #DIV/0! | #DIV/0!  | 1.1663E-06  | 4735.75 | 1324.4  | -3.57577 |  |
|         |             |         |         |          | 0.00161701  | 1354.4  | #DIV/0! | #DIV/0!  |  |

|         |             |         |         |          |             |         |         |          |
|---------|-------------|---------|---------|----------|-------------|---------|---------|----------|
|         |             |         |         |          | 3.34464E-05 | 1428.83 | #DIV/0! | #DIV/0!  |
|         |             |         |         |          | 7.48681E-07 | 2055.08 | 725.4   | -2.83302 |
|         |             |         |         |          | 0.000835639 | #DIV/0! | 1185.4  | #DIV/0!  |
|         |             |         |         |          | 1.29874E-06 | 1109.27 | 277.45  | -3.99808 |
| -4.9936 |             |         |         |          |             |         |         |          |
| #DIV/0! | 1.14325E-05 | #DIV/0! | 2809.85 | #DIV/0!  |             |         |         |          |
|         |             |         |         |          | 0.00886696  | 1076.47 | 417.767 | -2.57672 |
|         |             |         |         |          | 0.000751493 | 1087.3  | 421.067 | -2.58225 |
|         | 0.00306643  | 1207.37 | #DIV/0! | #DIV/0!  | 0.0019621   | 2763.15 | 997.45  | -2.77021 |
|         | 0.000852003 | 807.275 | 204.2   | -3.95335 | 0.00659138  | 1128.45 | 322.833 | -3.49546 |
|         | 8.38625E-06 | 2876.7  | 6656.1  | 2.3138   |             |         |         |          |
|         |             |         |         |          | 0.000986398 | #DIV/0! | 535.233 | #DIV/0!  |
|         | 5.80241E-10 | 976.325 | 304.35  | -3.2079  | 1.43935E-07 | 1508.77 | 647.467 | -2.33026 |
|         |             |         |         |          | 3.46709E-05 | 1346.9  | 441.1   | -3.0535  |
|         | 4.34295E-07 | 907.775 | 359.7   | -2.5237  | 8.22834E-08 | 1053.33 | 400.9   | -2.6274  |
|         | 9.78782E-06 | 998.2   | 396.867 | -2.5152  |             |         |         |          |
|         |             |         |         |          | 0.0231843   | 2003.73 | #DIV/0! | #DIV/0!  |
|         |             |         |         |          | 0.00242774  | 2154.18 | 652.4   | -3.30192 |
|         |             |         |         |          | 0.000377865 | 2241.08 | 1080.4  | -2.0743  |
|         | 2.36266E-06 | 958.525 | #DIV/0! | #DIV/0!  |             |         |         |          |
|         |             |         |         |          | 0.000160753 | 3624.15 | 844.8   | -4.28995 |
|         |             |         |         |          | 0.0124571   | 650.6   | 320.2   | -2.03186 |
|         | 1.12359E-05 | 2016.25 | 720.9   | -2.79685 | 8.65368E-07 | 3460.23 | 929.975 | -3.72077 |
|         |             |         |         |          | 7.62871E-06 | 1489.25 | 461.575 | -3.22645 |
|         |             |         |         |          | 0.0162505   | 1869.8  | 631.4   | -2.96136 |
|         |             |         |         |          | 3.82929E-07 | 3102.68 | 1435.28 | -2.16173 |
|         | 0.00482526  | 1930.4  | 4207.98 | 2.17985  | 3.42778E-06 | 1593.45 | 3595.63 | 2.2565   |
|         | 0.000166583 | 3909.4  | 8228.35 | 2.10476  | 1.96581E-09 | 2021.6  | 7978.58 | 3.94666  |
|         | 0.000112764 | 3562.18 | 1577.58 | -2.25801 |             |         |         |          |
|         |             |         |         |          | 5.22154E-05 | 1237.6  | 575.525 | -2.15038 |
|         |             |         |         |          | 0.0205573   | 1507.55 | 705.575 | -2.13663 |
| -2.2862 |             |         |         |          |             |         |         |          |
| -2.1395 |             |         |         |          |             |         |         |          |
|         |             |         |         |          | 3.31204E-05 | #DIV/0! | 4061.53 | #DIV/0!  |
|         | 0.00184942  | 1887.78 | 4194.15 | 2.22174  | 2.39737E-14 | 1377.58 | 5089.73 | 3.6947   |
|         | 2.69938E-07 | 2922.63 | 6030.88 | 2.06351  | 0.000114019 | 2053.35 | 446.3   | -4.60083 |
|         |             |         |         |          | 3.12553E-05 | 2049.13 | 813.325 | -2.51944 |
|         | 8.58229E-05 | 1227.2  | 610.975 | -2.00859 | 0.000121035 | 1578.7  | 597.75  | -2.64107 |
|         | 0.000641904 | 763.55  | 374.65  | -2.03804 | 7.45232E-05 | 3268.45 | 867.95  | -3.76571 |
|         |             |         |         |          | 6.87108E-06 | 3514.88 | 8309.83 | 2.36419  |
|         | 0.000884226 | 927.2   | 415.667 | -2.23063 |             |         |         |          |
|         |             |         |         |          | 0.000914036 | 1102.45 | 352.367 | -3.1287  |
|         |             |         |         |          | 1.79705E-07 | 3894.53 | 8996.48 | 2.31003  |
|         |             |         |         |          | 1.34524E-05 | 1255.75 | 309.367 | -4.0591  |
|         |             |         |         |          | 1.49403E-10 | 18964.1 | 44545.9 | 2.34896  |
|         |             |         |         |          | 0.00351119  | 816.85  | 242.4   | -3.36984 |
|         | 0.00226874  | #DIV/0! | 1442.63 | #DIV/0!  | 1.20527E-11 | #DIV/0! | 2305.77 | #DIV/0!  |
|         |             |         |         |          | 0.00547679  | 2040.33 | 846.25  | -2.41102 |
|         |             |         |         |          | 0.00705588  | 1163.7  | 398.833 | -2.91776 |
|         |             |         |         |          | 6.16093E-05 | 932.033 | #DIV/0! | #DIV/0!  |
|         |             |         |         |          | 1.05776E-06 | 2219.98 | 796.15  | -2.78839 |
|         | 0.000444963 | 2979.77 | 1039.27 | -2.86718 | 1.34515E-05 | 6774.65 | 1617.6  | -4.18809 |
|         |             |         |         |          | 4.04717E-05 | 3317.08 | 1308.8  | -2.53444 |
|         | 4.31602E-05 | 2666.08 | 820.225 | -3.25042 | 0.000184284 | 5806.1  | 1848.58 | -3.14085 |
|         | 0.00105557  | 547.8   | 1443.7  | 2.63545  | 0.00997954  | #DIV/0! | 1135.5  | #DIV/0!  |
|         |             |         |         |          | 2.59486E-05 | 26727.5 | 8008.93 | -3.33721 |
|         |             |         |         |          | 3.6331E-06  | 1838.88 | 600.4   | -3.06275 |
|         |             |         |         |          | 0.00534453  | 730.7   | 88.6    | -8.24718 |
| -3.3544 | 6.69245E-07 | 4503.9  | 1265.83 | -3.55807 | 9.80685E-06 | 3329    | 1283.33 | -2.59404 |
| -2.9977 | 0.000747181 | 2384.95 | #DIV/0! | #DIV/0!  |             |         |         |          |
|         |             |         |         |          | 0.0079843   | #DIV/0! | 2166.97 | #DIV/0!  |
| -2.1651 | 0.000025421 | 11820.9 | 5427.08 | -2.17813 |             |         |         |          |

|         |             |         |         |             |             |         |          |          |
|---------|-------------|---------|---------|-------------|-------------|---------|----------|----------|
|         |             |         |         | 0.000833633 | 4401.13     | 1203.28 | -3.65762 |          |
|         |             |         |         | 0.000218525 | 3190.2      | 1106.1  | -2.88419 |          |
|         | 0.000162123 | 648.6   | 248.8   | -2.60691    | 3.25734E-08 | 1840.93 | 375.4    | -4.90392 |
|         |             |         |         |             | 0.00255826  | 14818.8 | 5822.6   | -2.54505 |
|         |             |         |         |             | 0.0025573   | 44517.2 | 21353.8  | -2.08474 |
|         |             |         |         |             | 0.0198302   | 1892.98 | 899.7    | -2.10401 |
|         | 3.86983E-05 | 2260.23 | 657.975 | -3.43512    | 0.000048411 | 4945.48 | 1691.78  | -2.92325 |
|         |             |         |         |             | 0.00176185  | 1012.47 | #DIV/0!  | #DIV/0!  |
|         |             |         |         |             | 0.000854748 | 35556.2 | 17555.6  | -2.02536 |
|         |             |         |         |             | 0.00113942  | 4155.2  | 1855.78  | -2.23906 |
|         | 0.00134238  | 2026.8  | 946.6   | -2.14114    |             |         |          |          |
|         | 0.000410046 | 1215.18 | 420.8   | -2.88777    |             |         |          |          |
|         | 0.00320379  | 758.433 | 259.1   | -2.92718    |             |         |          |          |
|         | 0.00532985  | 576.833 | #DIV/0! | #DIV/0!     | 0.00170964  | 1488.88 | 316.65   | -4.70196 |
|         | 0.00138224  | 732.733 | 341.9   | -2.14312    |             |         |          |          |
| -2.02   | 4.88454E-06 | 1899.13 | 826.6   | -2.29751    |             |         |          |          |
|         | 4.26095E-05 | 1392.83 | 472.1   | -2.95028    | 0.000491996 | 2351.4  | 954.225  | -2.4642  |
|         | 0.000720761 | 665.075 | 249.3   | -2.66777    |             |         |          |          |
|         |             |         |         |             | 4.14613E-06 | 3367.35 | 1513.3   | -2.22517 |
|         |             |         |         |             | 0.00547606  | #DIV/0! | 986.9    | #DIV/0!  |
|         | 0.000368194 | 1365.67 | 359.8   | -3.79563    | 3.87299E-06 | 2876.23 | 797.033  | -3.60866 |
| 4.14042 | 6.24136E-15 | 1774.3  | 8594.63 | 4.84395     | 2.25278E-18 | 2231.2  | 14626.4  | 6.5554   |
| 3.99399 | 6.89852E-20 | 4639.8  | 27751.5 | 5.98118     | 2.45313E-21 | 5750    | 38613    | 6.7153   |
| 5.28737 | 3.54121E-17 | 4175.4  | 38699.3 | 9.2684      | 2.72086E-18 | 4894.65 | 47431.5  | 9.69047  |
|         |             |         |         |             | 0.0118003   | 1331.63 | 424.433  | -3.13742 |
|         |             |         |         |             | 0.000053214 | 3778.33 | 7740.78  | 2.04873  |
|         |             |         |         |             | 9.99214E-08 | 1822.65 | 5209.18  | 2.85802  |
|         |             |         |         |             | 0.00122457  | #DIV/0! | 2394.13  | #DIV/0!  |
|         | 0.000290774 | 21290   | 10618   | -2.00508    |             |         |          |          |
|         |             |         |         |             | 3.72605E-09 | 4287.85 | 12396.8  | 2.89114  |
|         |             |         |         |             | 0.00021942  | 3920.6  | 1216.48  | -3.22292 |
| -2.0145 |             |         |         |             | 8.65086E-08 | 2418.35 | 1017.73  | -2.37621 |
|         |             |         |         |             | 4.45476E-06 | #DIV/0! | 615.733  | #DIV/0!  |
|         |             |         |         |             | 4.29926E-06 | 2844.5  | 710.225  | -4.00507 |
|         | 3.98049E-05 | 2261.08 | 1011.73 | -2.23487    | 2.89009E-06 | 4355.2  | 1790.93  | -2.43182 |
|         | 0.0149248   | 552.225 | 167.8   | -3.29097    | 0.0111329   | 1829.87 | 636.5    | -2.87489 |
|         |             |         |         |             | 1.80676E-05 | 1946.37 | 715.5    | -2.72029 |
|         |             |         |         |             | 1.74141E-07 | #DIV/0! | 4508.38  | #DIV/0!  |
|         |             |         |         |             | 0.000133875 | 1576.2  | 590      | -2.67153 |
|         |             |         |         |             | 0.0140753   | 1032.47 | #DIV/0!  | #DIV/0!  |
|         | 0.000468133 | 4676.5  | 2027.4  | -2.30665    | 0.000609503 | 4473.3  | 2103.55  | -2.12655 |
|         | 9.85427E-07 | 5181.93 | 1711.5  | -3.02771    |             |         |          |          |
|         | 1.23556E-05 | 2091.2  | #DIV/0! | #DIV/0!     |             |         |          |          |
|         | 0.0004251   | 1307.43 | 326.55  | -4.00375    | 0.000245207 | 1619.8  | 800.4    | -2.02374 |
|         |             |         |         |             | 1.66352E-05 | 3226.75 | 667.675  | -4.83282 |
|         |             |         |         |             | 2.49854E-05 | 4857.7  | 1934.43  | -2.51119 |
|         |             |         |         |             | 6.70071E-06 | 8774.45 | 18405.6  | 2.09764  |
|         | 0.000267947 | 6830.18 | 3029    | -2.25493    |             |         |          |          |
|         | 1.41927E-06 | #DIV/0! | 3756.95 | #DIV/0!     | 0.000772415 | 1220    | #DIV/0!  | #DIV/0!  |
|         | 0.0125339   | 672.2   | #DIV/0! | #DIV/0!     | 0.000846593 | #DIV/0! | 3725.03  | #DIV/0!  |
|         |             |         |         |             | 0.00148488  | 1371.63 | #DIV/0!  | #DIV/0!  |
|         |             |         |         |             | 0.00486554  | 994.133 | #DIV/0!  | #DIV/0!  |
|         | 2.08457E-08 | 2793.48 | 5901.93 | 2.11275     |             |         |          |          |
|         | 0.000163446 | 2283.6  | 1017.5  | -2.24432    | 0.000290637 | 5641.45 | 2309.5   | -2.44271 |
|         | 0.00502614  | 1324.23 | 502.275 | -2.63645    |             |         |          |          |
|         | 0.00014642  | 897.6   | 344.333 | -2.60678    | 1.42067E-06 | 2138.15 | 531.3    | -4.02437 |
|         |             |         |         |             | 0.000560445 | 690.975 | 199.1    | -3.47049 |
| -4.2506 | 2.3482E-06  | 843.425 | 163.875 | -5.14676    |             |         |          |          |
|         |             |         |         |             | 4.51188E-06 | 3399.23 | 7296.93  | 2.14664  |
| -3.2272 | 1.92227E-09 | 2769.8  | 593.15  | -4.66965    | 0.00018163  | 1693.13 | 783.325  | -2.16146 |
|         | 7.95269E-05 | 3399.08 | 1225.38 | -2.77391    | 1.24525E-06 | 7891.25 | 1997.85  | -3.94987 |
|         | 0.00485422  | 612.9   | 182.45  | -3.35928    | 0.000426932 | 1548.88 | 557.8    | -2.77676 |
|         |             |         |         |             | 0.0207465   | 1228.6  | #DIV/0!  | #DIV/0!  |

|         |             |         |         |             |             |         |          |
|---------|-------------|---------|---------|-------------|-------------|---------|----------|
|         |             |         |         | 0.0223276   | 927.667     | #DIV/0! | #DIV/0!  |
|         | 1.43915E-08 | 8802.6  | 3326.13 | -2.6465     |             |         |          |
|         |             |         |         | 0.000109348 | 4422.65     | 2106.13 | -2.0999  |
|         |             |         |         | 0.00189166  | 1363.23     | 539.067 | -2.52886 |
|         | 0.0140372   | 1327.57 | 473.3   | -2.80492    | 0.00119557  | 1762.93 | 539.633  |
|         |             |         |         | 4.08796E-05 | 1004        | 216.525 | -4.63688 |
|         | 6.85951E-05 | 1527.43 | 3151.63 | 2.06336     |             |         |          |
|         | 1.08783E-05 | 2458.65 | 928.15  | -2.64898    | 9.6539E-10  | 4939.38 | 1262.95  |
|         | 0.00158656  | 696.8   | 195.1   | -3.5715     | 0.000801826 | 1422.73 | 529.7    |
| -2.3463 |             |         |         |             |             |         |          |
|         |             |         |         | 0.00323955  | 1801.7      | 639.767 | -2.81618 |
| -2.4654 |             |         |         |             |             |         |          |
|         | 7.14968E-07 | 7656.35 | 28082.4 | 3.66785     | 3.00179E-07 | 9584.7  | 37253.3  |
|         |             |         |         |             | 5.09265E-10 | 23996.9 | 51930.2  |
|         | 2.93826E-07 | 4272.23 | 24834.3 | 5.81296     | 3.05885E-08 | 3691.55 | 23310.7  |
|         |             |         |         |             | 0.00103628  | 1198.63 | 349.8    |
| -2.1022 | 2.28103E-06 | 1332.83 | 464.275 | -2.87077    |             |         |          |
|         |             |         |         | 0.000454881 | 1428.4      | 510.55  | -2.79777 |
|         |             |         |         | 0.00183874  | 33556.2     | 11208.9 | -2.99371 |
|         |             |         |         | 0.00289978  | 30982.8     | 10811.7 | -2.86567 |
|         |             |         |         | 0.00314858  | 29630.3     | 10536.2 | -2.81223 |
|         |             |         |         | 0.00549719  | 21969.2     | 8175.33 | -2.68726 |
|         |             |         |         | 0.0044356   | 11039.1     | 3796.93 | -2.90737 |
|         |             |         |         | 0.000101682 | 1337.23     | 3381.8  | 2.52897  |
| 2.25877 |             |         |         |             |             |         |          |
|         |             |         |         | 2.3115E-06  | 6340        | 2962.77 | -2.13989 |
|         |             |         |         | 0.000797395 | 3001.8      | 6079.18 | 2.02518  |
|         | 0.000159794 | 818.9   | 222.433 | -3.68155    | 7.28591E-05 | 1721.18 | 491.175  |
|         | 5.28763E-06 | 2821.38 | 1202.1  | -2.34704    | 1.23841E-05 | 5351.55 | 2364.78  |
|         | 0.00432613  | 1483.37 | 716.667 | -2.06981    |             |         |          |
|         |             |         |         | 0.00327218  | 1553.7      | 500.7   | -3.10306 |
| -3.0181 | 1.31206E-08 | 3124.3  | 1067.9  | -2.92565    | 5.2648E-06  | 2450.75 | 1087.73  |
| -3.1698 |             |         |         |             |             |         |          |
|         | 3.45092E-05 | 1395.6  | 629.8   | -2.21594    | 8.13156E-07 | 2273.93 | 1008.83  |
|         |             |         |         |             | 0.000842732 | 2195.67 | 638.275  |
|         | 0.00171297  | 528.1   | #DIV/0! | #DIV/0!     |             |         |          |
|         | 7.43831E-07 | 2232.78 | 748.775 | -2.9819     | 8.2142E-09  | 5960.15 | 1520.8   |
|         |             |         |         |             | 0.00195085  | 2155.3  | 574.833  |
|         | 0.000322349 | 2004.78 | 856.625 | -2.34032    | 2.40509E-06 | 5193.13 | 1467.3   |
|         | 0.000209001 | 2609.6  | 1066.58 | -2.44671    |             |         |          |
|         |             |         |         | 0.000395556 | 1008.58     | 323.2   | -3.12059 |
|         |             |         |         | 4.69609E-08 | #DIV/0!     | 3231.48 | #DIV/0!  |
|         | 0.0113071   | 779.9   | #DIV/0! | #DIV/0!     |             |         |          |
|         |             |         |         | 0.00122747  | 992.133     | 415.6   | -2.38723 |
|         | 0.000147891 | 657.233 | #DIV/0! | #DIV/0!     |             |         |          |
|         |             |         |         | 0.00330848  | 507.675     | 182.4   | -2.78331 |
|         |             |         |         | 1.90593E-06 | 13396.1     | 6021.6  | -2.22467 |
|         | 9.40217E-06 | 947.125 | 332.625 | -2.84743    | 1.92786E-07 | 1799.03 | 495.7    |
|         |             |         |         |             | 0.00202756  | 1447.53 | 601      |
|         | 0.0132473   | 2200.68 | 1024.75 | -2.14752    | 0.0019879   | 4672.95 | 2020.98  |
|         |             |         |         |             | 0.000987545 | 2743.93 | 861.9    |
| -2.8987 | 4.47859E-09 | 5834.55 | 1463.2  | -3.98753    | 3.25327E-11 | 8309.08 | 1582.6   |
|         |             |         |         |             | 2.13946E-07 | #DIV/0! | 819.25   |
|         | 6.50667E-06 | 3537.23 | 1484.78 | -2.38233    |             |         |          |
|         | 0.00120533  | 517.05  | 246.525 | -2.09735    | 0.000402815 | 1222.58 | 531.85   |
|         |             |         |         |             | 0.000339957 | 2146.58 | 940.025  |
|         | 3.2555E-08  | 15633.9 | 31828.5 | 2.03586     | 1.10396E-08 | 10932.3 | 22194.2  |
|         |             |         |         |             | 2.89255E-09 | 17898.3 | 38766.7  |
|         |             |         |         |             | 4.37111E-09 | 17573.6 | 42446.1  |
|         | 4.4712E-11  | 22904.1 | 48074.6 | 2.09895     | 5.06173E-15 | 12920.1 | 32698.6  |
|         |             |         |         |             | 0.000403698 | 1227.28 | 441.1    |
|         |             |         |         |             | 0.0136018   | 999.9   | 383.9    |
|         |             |         |         |             | 2.01439E-06 | 2300.05 | 974.6    |

|         |             |         |         |          |             |         |         |          |
|---------|-------------|---------|---------|----------|-------------|---------|---------|----------|
|         |             |         |         |          | 0.00889924  | 7536.03 | 1400.9  | -5.37942 |
|         |             |         |         |          | 0.000462491 | 1500.07 | 611.467 | -2.45323 |
| 3.60872 | 2.68469E-09 | 1332.83 | 6669.13 | 5.00375  | 1.21443E-09 | 1724.1  | 6487.83 | 3.76302  |
|         |             |         |         |          | 3.4561E-07  | #DIV/0! | 3390.23 | #DIV/0!  |
| 2.88838 | 0.000590544 | 750     | 1903.85 | 2.53847  | 0.0213307   | #DIV/0! | 1323.3  | #DIV/0!  |
| 4.10556 | 2.29624E-06 | #DIV/0! | 2220.23 | #DIV/0!  |             |         |         |          |
|         | 0.00124124  | 711.075 | 224.1   | -3.17303 |             |         |         |          |
|         |             |         |         |          | 3.1716E-07  | 2453.43 | 6054.03 | 2.46757  |
|         | 0.00136656  | 2504.8  | 5869.1  | 2.34314  | 0.000610466 | 2753.13 | 6998.13 | 2.54188  |
|         |             |         |         |          | 0.00155966  | 3017.55 | 7485.43 | 2.48063  |
|         | 2.31876E-05 | 5695.75 | 14313.1 | 2.51295  | 5.74474E-07 | 4361.17 | 11607.7 | 2.66159  |
|         | 2.84461E-10 | 6716.2  | 21033.4 | 3.13174  | 5.86602E-16 | 4871.93 | 30487.8 | 6.25785  |
|         |             |         |         |          | 0.000105727 | 5638.48 | 1378.03 | -4.09171 |
|         |             |         |         |          | 0.00280728  | #DIV/0! | 871.85  | #DIV/0!  |
| -3.0087 | 0.00220206  | 617.125 | 256.9   | -2.4022  | 0.00146313  | 1459.9  | 438.533 | -3.32905 |
|         |             |         |         |          |             |         |         |          |
|         |             |         |         |          | 3.17676E-08 | 4914.38 | 11278.6 | 2.29502  |
|         |             |         |         |          | 4.25305E-08 | 2187.63 | 4964.63 | 2.26941  |
|         | 0.000341286 | 529.175 | 105.7   | -5.00639 | 0.00321469  | 1297.03 | 311.133 | -4.16874 |
|         |             |         |         |          | 6.05824E-08 | 6519.73 | 13541.3 | 2.07697  |
|         |             |         |         |          | 5.23201E-06 | 5094.78 | 10265.9 | 2.01498  |
|         |             |         |         |          | 7.07621E-06 | 1774.7  | 3552.78 | 2.0019   |
|         |             |         |         |          | 1.19096E-09 | 6380.33 | 14245   | 2.23265  |
|         |             |         |         |          | 0.00740518  | 1152.9  | #DIV/0! | #DIV/0!  |
|         |             |         |         |          | 0.000405286 | 4284.43 | 843.8   | -5.07754 |
|         | 0.00225566  | 1093.15 | 280.467 | -3.89761 | 0.000538038 | 3111.35 | 463.625 | -6.71092 |
|         |             |         |         |          | 1.02486E-06 | 3021.4  | 1221.75 | -2.47301 |
|         | 0.00428103  | 619.625 | 210.8   | -2.9394  | 0.000905987 | 1231    | 415.433 | -2.96317 |
|         |             |         |         |          | 0.00162465  | 843.1   | 2132.68 | 2.52956  |
|         | 0.00465585  | 801.975 | 397.933 | -2.01535 | 0.00132409  | 1436.2  | 398.275 | -3.60605 |
|         |             |         |         |          | 6.00394E-09 | 2960.95 | 836.5   | -3.53969 |
|         |             |         |         |          | 0.00049492  | 1144.9  | 356.7   | -3.2097  |
|         | 3.33423E-05 | 13981.1 | 3460    | -4.04077 | 5.56833E-11 | 52571   | 4016.5  | -13.0888 |
|         | 1.37655E-06 | 5110.38 | 1141.9  | -4.47533 | 1.79071E-07 | 13696   | 2841.43 | -4.82013 |
|         |             |         |         |          | 1.31777E-06 | 2014.93 | 614.35  | -3.27977 |
|         | 5.05081E-08 | 2024.15 | 544.067 | -3.72041 | 4.04333E-08 | 4697.68 | 1183    | -3.97098 |
|         | 0.00791012  | 685.85  | 317.8   | -2.15812 | 0.000225282 | 1448.85 | 468.4   | -3.09319 |
| -2.1228 |             |         |         |          |             |         |         |          |
|         | 0.00011536  | 4720.3  | 1939.93 | -2.43324 | 1.85256E-05 | 10438.8 | 3812.63 | -2.73795 |
|         |             |         |         |          | 0.000435996 | 1417.53 | #DIV/0! | #DIV/0!  |
|         |             |         |         |          | 0.00006832  | 998.5   | 307.1   | -3.25138 |
|         | 0.00597201  | 893.433 | 234.3   | -3.8132  |             |         |         |          |
|         |             |         |         |          | 0.0152228   | 783.875 | 188.3   | -4.1629  |
|         |             |         |         |          | 0.000246487 | 1310.83 | 500.6   | -2.61852 |
|         | 5.69098E-10 | 3977.08 | 12517.2 | 3.14734  | 5.62215E-13 | 2937.58 | 13723.6 | 4.67173  |
|         | 1.57828E-06 | 1533.93 | 4361.18 | 2.84313  | 1.70129E-11 | #DIV/0! | 4596.73 | #DIV/0!  |
|         | 0.000522017 | 2139.18 | 712.825 | -3.00098 | 7.09618E-05 | 4490.63 | 1439.83 | -3.11887 |
| 2.03488 | 0.000250017 | 642.533 | 1319.5  | 2.05359  |             |         |         |          |
| 2.18987 |             |         |         |          |             |         |         |          |
|         | 0.0157513   | #DIV/0! | 941.333 | #DIV/0!  | 0.0167858   | #DIV/0! | 1481.3  | #DIV/0!  |
|         |             |         |         |          | 1.06947E-08 | 17939.5 | 46258.2 | 2.57856  |
|         | 3.86414E-06 | 21894.7 | 44350.1 | 2.0256   | 4.05488E-08 | 16640.7 | 41117.4 | 2.47089  |
|         |             |         |         |          | 5.29726E-08 | 18384.9 | 46932.6 | 2.55279  |
|         | 0.0040221   | 789.125 | 344.1   | -2.2933  |             |         |         |          |
|         | 0.00415336  | #DIV/0! | 863.6   | #DIV/0!  | 0.00163451  | #DIV/0! | 1228    | #DIV/0!  |
|         |             |         |         |          | 1.50142E-05 | 1369    | 441.567 | -3.10032 |
| -2.9204 | 8.01651E-08 | 10580.6 | 3607.6  | -2.93287 |             |         |         |          |
|         |             |         |         |          | 0.000954262 | 2347.43 | 655.333 | -3.58203 |
|         | 6.41588E-05 | 1176.6  | 517     | -2.27582 | 1.59121E-06 | 2738.95 | 968.633 | -2.82764 |
|         | 3.9094E-07  | 2329.03 | 957.075 | -2.43348 |             |         |         |          |
|         | 4.73583E-06 | 1556.93 | 717.167 | -2.17094 | 4.32733E-07 | 2438.05 | 882.425 | -2.7629  |
|         |             |         |         |          | 3.44498E-10 | 4346.6  | 9077.75 | 2.08847  |
|         | 1.35484E-10 | 2613.6  | 5699.1  | 2.18056  | 2.81295E-14 | #DIV/0! | 5921.63 | #DIV/0!  |



|         |             |         |         |          |             |         |         |          |
|---------|-------------|---------|---------|----------|-------------|---------|---------|----------|
| 2.8374  | 9.12177E-13 | 2845.85 | 18935.5 | 6.65371  | 8.83308E-16 | 2907.08 | 29137.4 | 10.0229  |
|         | 4.92509E-07 | 1914.13 | 662.875 | -2.88761 | 0.000130627 | 2352.43 | 1008.5  | -2.3326  |
|         |             |         |         |          | 0.00383521  | 826.7   | 240.9   | -3.43171 |
|         |             |         |         |          | 5.02403E-05 | 903.525 | 364.5   | -2.47881 |
| -2.0508 | 1.90118E-06 | 1231.95 | 610.467 | -2.01805 | 1.46785E-10 | 2378.05 | 777.3   | -3.05937 |
|         |             |         |         |          | 0.0217216   | 1118.15 | 306.7   | -3.64575 |
|         |             |         |         |          | 0.000445505 | #DIV/0! | 5280.55 | #DIV/0!  |
|         |             |         |         |          | 0.0111482   | #DIV/0! | 2859.95 | #DIV/0!  |
|         |             |         |         |          | 2.34313E-05 | 2087.1  | 857.4   | -2.43422 |
|         |             |         |         |          | 1.71755E-06 | 1356.03 | 505.467 | -2.68272 |
|         | 0.00859142  | 672.9   | 269.8   | -2.49407 |             |         |         |          |
|         | 6.30427E-05 | 1873.63 | 778.725 | -2.40602 | 0.00129601  | 5892.78 | 2332    | -2.52692 |
|         |             |         |         |          | 1.45669E-08 | 27652.1 | 57616.5 | 2.08362  |
|         | 0.00931459  | 548.925 | 193.45  | -2.83755 | 0.000485432 | 1169.9  | 350.3   | -3.33971 |
|         |             |         |         |          | 3.40809E-05 | 1722    | 676.775 | -2.54442 |
|         | 0.000947436 | 2682.05 | 886.775 | -3.0245  | 0.000192753 | 6256.13 | 2325.9  | -2.68977 |
|         | 0.0024077   | 1238.85 | 362.633 | -3.41626 | 0.00962211  | 2094.35 | 930.65  | -2.25042 |
|         |             |         |         |          | 1.58646E-15 | 4248.78 | 12307.3 | 2.89668  |
|         | 0.000229481 | 35061.2 | 71091.4 | 2.02764  | 2.28754E-10 | 15446.6 | 64613.1 | 4.18299  |
|         | 0.00852252  | 1798.68 | #DIV/0! | #DIV/0!  | 0.00314772  | 3005.1  | 1013.95 | -2.96376 |
|         | 0.00187842  | 512.075 | #DIV/0! | #DIV/0!  |             |         |         |          |
|         |             |         |         |          | 4.10094E-08 | 18173.4 | 8699.28 | -2.08906 |
|         | 0.0139138   | 643.975 | #DIV/0! | #DIV/0!  |             |         |         |          |
|         | 1.49016E-07 | 2173.5  | #DIV/0! | #DIV/0!  | 9.24003E-08 | 3472.05 | 1453.13 | -2.38937 |
|         | 0.00045244  | 7306.98 | 2807.35 | -2.6028  | 0.000568304 | 14667.7 | 6794.35 | -2.1588  |
|         |             |         |         |          | 2.68586E-08 | 4024.33 | 8998.85 | 2.23611  |
|         | 1.13168E-07 | 1044.9  | 486     | -2.15    | 3.47689E-05 | 1849.5  | 874.95  | -2.11384 |
|         | 0.00797729  | 2493.78 | 1089.03 | -2.28992 | 0.00309206  | 2652.3  | 1104.7  | -2.40092 |
| -2.2606 | 5.80246E-06 | 1220.53 | 389.4   | -3.13439 |             |         |         |          |
|         |             |         |         |          | 0.000316152 | 2057.73 | 730.725 | -2.816   |
|         |             |         |         |          | 0.00526591  | 2429.53 | 1015.88 | -2.39156 |
|         |             |         |         |          | 1.10844E-05 | 2671.4  | 695.525 | -3.84084 |
| 5.38708 | 5.66138E-07 | 1415.7  | 5996.6  | 4.23578  | 4.58104E-09 | #DIV/0! | 10666.5 | #DIV/0!  |
|         | 4.77048E-09 | 2418    | 1067.77 | -2.26454 |             |         |         |          |
|         |             |         |         |          | 4.00602E-07 | 3360.53 | 9720.18 | 2.89246  |
|         |             |         |         |          | 0.00285355  | 1665.95 | 324.9   | -5.12758 |
| -2.8169 | 1.14919E-10 | 17044.5 | 5375.3  | -3.1709  | 6.15169E-12 | 8824.85 | 2528.18 | -3.4906  |
| -2.1284 |             |         |         |          |             |         |         |          |
|         | 0.000706189 | 896.333 | #DIV/0! | #DIV/0!  |             |         |         |          |
|         | 0.00538095  | 2060.93 | 957.7   | -2.15195 |             |         |         |          |
|         |             |         |         |          | 0.000234002 | 4886    | 10185.7 | 2.08468  |
|         |             |         |         |          |             |         |         |          |
|         |             |         |         |          | 0.000923368 | #DIV/0! | 1089.03 | #DIV/0!  |
|         |             |         |         |          | 0.000178896 | 2469.03 | 659.35  | -3.74463 |
|         |             |         |         |          | 0.000283755 | 4287.1  | 1656.08 | -2.58871 |
|         | 5.15776E-05 | 684.375 | 221.25  | -3.09322 | 4.38012E-07 | 1373    | 323.4   | -4.24552 |
|         |             |         |         |          | 0.000179722 | 1470.93 | #DIV/0! | #DIV/0!  |
|         | 0.0144176   | 505.7   | #DIV/0! | #DIV/0!  |             |         |         |          |
| -3.5837 |             |         |         |          | 0.00343391  | 1105.4  | #DIV/0! | #DIV/0!  |
|         | 9.78608E-05 | #DIV/0! | 2132.33 | #DIV/0!  | 7.49522E-07 | #DIV/0! | 1812.93 | #DIV/0!  |
|         |             |         |         |          | 0.0115755   | 1617.5  | 529.567 | -3.05438 |
|         |             |         |         |          | 1.48849E-06 | 4062.6  | 11768.3 | 2.89675  |
|         |             |         |         |          | 0.000336428 | 2502.45 | 919.45  | -2.72168 |
|         |             |         |         |          | 0.00244091  | 1240.9  | 563.5   | -2.20213 |
|         | 0.00221067  | 559.025 | 226.8   | -2.46484 |             |         |         |          |
|         | 6.06003E-05 | 2180.9  | #DIV/0! | #DIV/0!  | 0.000298739 | 2415.65 | 735.65  | -3.28369 |
|         | 0.00110256  | 1132.78 | 460.167 | -2.46166 |             |         |         |          |
|         | 0.00765057  | 881.675 | 392.65  | -2.24545 |             |         |         |          |
|         |             |         |         |          | 0.000156896 | 2412.93 | 557.367 | -4.32915 |
|         | 0.000520535 | 529.85  | #DIV/0! | #DIV/0!  |             |         |         |          |

|         |             |         |         |          |             |         |         |          |
|---------|-------------|---------|---------|----------|-------------|---------|---------|----------|
|         | 0.00172721  | 552.8   | 151.2   | -3.65608 |             |         |         |          |
|         | 4.81849E-06 | 1274.65 | 440.5   | -2.89364 | 0.000314797 | 1809.33 | 843.4   | -2.14528 |
|         | 0.000426925 | 1070.5  | 2571.03 | 2.4017   | 0.000143232 | #DIV/0! | 1923    | #DIV/0!  |
|         |             |         |         |          | 0.00327752  | 2665.5  | 613.3   | -4.34616 |
|         |             |         |         |          | 0.0179791   | 2017.5  | 539.325 | -3.74079 |
| #DIV/0! |             |         |         |          |             |         |         |          |
|         |             |         |         |          | 0.00514271  | 1030.05 | 479.8   | -2.14683 |
|         |             |         |         |          | 0.00475461  | 953.425 | 374.9   | -2.54314 |
|         |             |         |         |          | 0.000787228 | 1797.05 | 290.5   | -6.18606 |
|         |             |         |         |          | 4.45556E-06 | 2896.15 | 584.425 | -4.95555 |
|         |             |         |         |          | 4.08816E-05 | 2716.95 | 897.1   | -3.02859 |
|         |             |         |         |          | 6.81094E-06 | 2049.7  | 721.233 | -2.84194 |
|         | 0.0136836   | 1756.08 | #DIV/0! | #DIV/0!  | 1.16759E-05 | 1979.43 | #DIV/0! | #DIV/0!  |
|         |             |         |         |          | 1.54234E-05 | 1345.4  | 3326.78 | 2.4727   |
|         | 2.98903E-06 | 1049.78 | 2224.08 | 2.11862  |             |         |         |          |
| -2.396  |             |         |         |          |             |         |         |          |
| -2.083  | 0.000753096 | 29195.8 | 11905.1 | -2.45237 | 2.96828E-05 | 2818.1  | 772.05  | -3.65015 |
|         |             |         |         |          | 0.00103987  | 1753.37 | 818.375 | -2.1425  |
|         | 8.24716E-07 | 1202.9  | 422.733 | -2.84553 |             |         |         |          |
| 2.33318 | 0.000104049 | 901.967 | 2727.18 | 3.02359  | 8.01154E-06 | #DIV/0! | 2059.23 | #DIV/0!  |
|         | 3.2242E-10  | 2045.73 | 4608.43 | 2.25271  |             |         |         |          |
|         | 2.00003E-05 | 8994.15 | 18162.7 | 2.01939  | 4.22829E-07 | 5577.45 | 12500.1 | 2.24118  |
|         |             |         |         |          | 0.00079825  | #DIV/0! | 1235    | #DIV/0!  |
|         |             |         |         |          | 0.000173614 | 1561.13 | 512.15  | -3.04818 |
|         | 2.13567E-06 | 17937.5 | 40286   | 2.24592  | 8.94684E-11 | 8825.05 | 29639.3 | 3.35854  |
|         | 4.70466E-06 | 1266.08 | 434.95  | -2.91085 | 0.00594001  | #DIV/0! | 1041.3  | #DIV/0!  |
|         |             |         |         |          | 3.41049E-05 | #DIV/0! | 2312.85 | #DIV/0!  |
| -2.2576 | 1.02949E-05 | 2350.63 | 573     | -4.10231 | 5.83977E-05 | 1822.28 | 705.2   | -2.58405 |
|         | 0.00964424  | 1337.63 | 457.8   | -2.92187 |             |         |         |          |
| -3.5504 | 0.000461526 | 9907.4  | 3584.83 | -2.76371 |             |         |         |          |
|         |             |         |         |          | 4.61297E-11 | 4508.08 | 16645.2 | 3.69231  |
|         |             |         |         |          | 4.43377E-07 | 3345.05 | 1492.88 | -2.24068 |
|         |             |         |         |          | 6.82089E-08 | 1512.83 | 647     | -2.33821 |
|         |             |         |         |          | 1.14014E-10 | 19526.6 | 56412.1 | 2.88899  |
|         |             |         |         |          | 1.69096E-10 | 23582.1 | 69636.2 | 2.95292  |
|         |             |         |         |          | 4.17941E-10 | 17969.1 | 55008.6 | 3.0613   |
| -2.3384 | 0.00131352  | 2127.18 | 1048.55 | -2.02868 |             |         |         |          |
|         | 0.000102222 | 649.05  | 297.25  | -2.18352 |             |         |         |          |
|         |             |         |         |          | 1.55418E-12 | 4392.28 | 13896.8 | 3.16391  |
|         |             |         |         |          | 7.99539E-05 | 133805  | 25857.7 | -5.17467 |
|         |             |         |         |          | 9.87512E-09 | 1448.28 | 4427.55 | 3.05712  |
|         |             |         |         |          | 3.50697E-05 | 1248.25 | 530.25  | -2.35408 |
| #DIV/0! | 0.00059649  | #DIV/0! | 1757.93 | #DIV/0!  |             |         |         |          |
|         |             |         |         |          | 3.62026E-07 | 5607.4  | 13613.6 | 2.42779  |
|         |             |         |         |          | 6.18155E-06 | 2353.63 | 8516.6  | 3.6185   |
| -2.3721 |             |         |         |          |             |         |         |          |
|         | 7.48042E-05 | 1247.33 | 362.2   | -3.44377 | 5.04922E-05 | 4089.88 | 935.95  | -4.36976 |
|         | 0.000196614 | 553.9   | 235.1   | -2.35602 | 2.18425E-08 | 1201.73 | 283.65  | -4.23665 |
|         | 0.000271526 | 2259.3  | 882.775 | -2.55932 | 0.000573427 | 2310.38 | 1028.3  | -2.24679 |
|         |             |         |         |          | 0.000214231 | 2065    | 599.5   | -3.44454 |
|         |             |         |         |          | 8.7829E-13  | 2009.65 | 5614.03 | 2.79353  |
| 3.25104 | 1.25785E-09 | 3404.98 | 21113.6 | 6.2008   | 9.99322E-12 | 3532.2  | 20694.6 | 5.85885  |
| 3.602   | 1.5529E-07  | 19424.5 | 84219.7 | 4.33574  | 8.71124E-15 | 6385.48 | 103243  | 16.1684  |
|         |             |         |         |          | 9.5679E-09  | 3075.08 | 8573.85 | 2.78818  |
|         |             |         |         |          | 0.00533183  | 1033.4  | 496.975 | -2.07938 |
|         |             |         |         |          | 0.00370169  | 1711.15 | 421.633 | -4.05838 |
|         | 0.000439935 | 712.575 | 235.75  | -3.02259 | 0.00042135  | 1926.83 | 466.25  | -4.1326  |
|         |             |         |         |          | 0.000639251 | #DIV/0! | 2614.15 | #DIV/0!  |
|         |             |         |         |          | 1.76503E-07 | 80850.6 | 174123  | 2.15364  |

|         |             |         |         |          |             |         |         |          |
|---------|-------------|---------|---------|----------|-------------|---------|---------|----------|
|         |             |         |         |          | 7.54871E-09 | 42220.3 | 114536  | 2.71281  |
|         |             |         |         |          | 0.00282394  | 14910.6 | 43224.2 | 2.89889  |
|         |             |         |         |          | 1.81327E-06 | 10235   | 32877.5 | 3.21228  |
|         |             |         |         |          | 1.00914E-09 | 6098.28 | 27022.2 | 4.43112  |
|         | 8.4097E-07  | 1310.05 | 3663.08 | 2.79613  | 2.05822E-10 | 1259.7  | 3729.78 | 2.96084  |
|         | 4.11802E-05 | 1521.25 | 3136.65 | 2.06189  |             |         |         |          |
|         |             |         |         |          | 0.00128704  | 1849.35 | 448.325 | -4.12502 |
|         |             |         |         |          | 1.26661E-12 | 4874.88 | 12681.5 | 2.60139  |
|         | 2.35436E-10 | 3515.45 | 887.875 | -3.9594  |             |         |         |          |
|         | 4.77634E-09 | 2701.33 | 851.525 | -3.17234 | 3.04777E-10 | 4203.48 | 1173.65 | -3.58154 |
|         |             |         |         |          | 0.00001182  | 3414.3  | 1351.2  | -2.52687 |
|         |             |         |         |          | 0.00147495  | 1888.23 | 875.7   | -2.15626 |
|         |             |         |         |          | 0.000086465 | 976.175 | 474.725 | -2.0563  |
| -2.4036 | 7.83575E-07 | 3329.1  | 1171.9  | -2.84077 |             |         |         |          |
| -2.6339 | 1.39581E-06 | 2952.83 | 1195.88 | -2.46918 |             |         |         |          |
| -2.8705 | 0.000692751 | 1959.98 | 973.5   | -2.01333 |             |         |         |          |
|         |             |         |         |          | 7.18684E-07 | 2557.53 | 7983.13 | 3.12143  |
|         | 2.30645E-05 | 18499.5 | 47114.7 | 2.54681  | 1.72974E-10 | 6341.23 | 27871.6 | 4.39529  |
| -2.8893 | 3.4676E-07  | 2601.9  | 851.2   | -3.05674 | 7.421E-07   | 2496.55 | 1051.53 | -2.3742  |
|         | 4.87496E-06 | 1051.45 | 330.525 | -3.18115 | 1.38773E-08 | 3036.28 | 686.95  | -4.41994 |
|         | 3.13293E-05 | 6221.23 | 2600.88 | -2.39197 |             |         |         |          |
|         |             |         |         |          | 0.00594454  | 1271.67 | #DIV/0! | #DIV/0!  |
|         | 2.033E-08   | 26221.5 | 56322.4 | 2.14795  | 7.34991E-18 | 11721   | 59358.3 | 5.06426  |
|         | 1.78701E-10 | 20741.2 | 52898.9 | 2.55042  | 4.18584E-19 | 8918.23 | 50457.5 | 5.6578   |
|         |             |         |         |          | 0.000377643 | #DIV/0! | 1726.28 | #DIV/0!  |
|         |             |         |         |          | 0.0147018   | 938.7   | 306.2   | -3.06564 |
| 2.70377 | 3.56782E-12 | 3403.2  | 17435.2 | 5.12317  | 2.08664E-15 | 2411.88 | 16017.9 | 6.64126  |
|         |             |         |         |          | 4.12357E-13 | 8371.05 | 23144.4 | 2.76481  |
|         | 1.98056E-07 | 4511.48 | 10673.7 | 2.3659   | 6.74911E-08 | 2825.18 | 6796.5  | 2.40569  |
|         | 3.84378E-05 | 4663.8  | 9390.73 | 2.01354  | 5.17563E-09 | 2202.05 | 4914.4  | 2.23174  |
|         |             |         |         |          | 6.58131E-08 | 2453.37 | 6693.65 | 2.72835  |
|         |             |         |         |          |             |         |         |          |
|         | 0.00123791  | 1148.87 | 512.75  | -2.2406  |             |         |         |          |
|         |             |         |         |          | 3.04642E-10 | 1066.75 | 3859.88 | 3.61835  |
|         |             |         |         |          | 1.55252E-13 | 2216    | 12282   | 5.54241  |
|         |             |         |         |          | 4.62931E-15 | 9098.18 | 62181.4 | 6.83449  |
|         |             |         |         |          | 1.96093E-16 | 3245.7  | 22670.7 | 6.98483  |
|         | 0.000209104 | 5045.33 | 2397.1  | -2.10476 |             |         |         |          |
| -2.1848 |             |         |         |          |             |         |         |          |
| -2.7965 | 1.24557E-07 | 5342.8  | 2191.35 | -2.43813 |             |         |         |          |
|         |             |         |         |          | 1.78616E-10 | 5909.93 | 12878.3 | 2.17909  |
|         |             |         |         |          | 2.81876E-18 | 3550.6  | 18780.6 | 5.28942  |
| 2.22477 | 1.37955E-07 | 8498.98 | 28381.6 | 3.33942  | 8.71571E-11 | 3273.43 | 17989.4 | 5.49557  |
|         | 0.00339008  | 2222.63 | 4467.2  | 2.00987  | 4.18281E-07 | #DIV/0! | 4268.83 | #DIV/0!  |
|         |             |         |         |          | 3.42861E-06 | 1758.6  | 644.067 | -2.73046 |
|         |             |         |         |          | 2.46397E-05 | 1962.55 | #DIV/0! | #DIV/0!  |
|         | 6.05403E-09 | 2536.45 | 10585.7 | 4.17344  | 2.08378E-14 | 1240.25 | 8397.35 | 6.77069  |
| 2.03433 | 1.00667E-11 | 3631.65 | 17233   | 4.74523  | 7.83009E-16 | 2273.7  | 17272.2 | 7.59653  |
| 2.16724 | 7.06441E-11 | 2695.7  | 11428.5 | 4.23953  | 1.32149E-16 | 1033.5  | 9841.38 | 9.52238  |
| 2.32639 | 5.08839E-12 | 9403.75 | 34700.8 | 3.6901   | 7.73181E-20 | 3069.85 | 33174.4 | 10.8065  |
| #DIV/0! | 1.02804E-06 | 1025.03 | #DIV/0! | #DIV/0!  |             |         |         |          |
|         | 2.8934E-07  | 9616.7  | 20731.8 | 2.15581  | 2.40667E-09 | 4726.28 | 11987.3 | 2.53631  |
| -2.1554 |             |         |         |          | 0.000711668 | #DIV/0! | 2053.75 | #DIV/0!  |
| 5.74829 | 5.42094E-11 | 4410.2  | 29822.3 | 6.76212  | 5.20632E-10 | 5706    | 31131   | 5.45583  |
| 2.53009 | 0.000184493 | 860.6   | 1834.18 | 2.13127  | 6.3763E-06  | #DIV/0! | 1783.65 | #DIV/0!  |
|         |             |         |         |          |             |         |         |          |
|         | 2.22195E-06 | 2038.68 | 850.2   | -2.39788 |             |         |         |          |
| -2.3742 | 0.000139843 | 10274.7 | 4865.35 | -2.11182 |             |         |         |          |
|         |             |         |         |          | 0.000786149 | 2904.45 | 1377.2  | -2.10895 |
|         |             |         |         |          | 1.05309E-06 | 7803.65 | 18580.9 | 2.38106  |
|         | 0.00540317  | 5464.38 | 12136.1 | 2.22094  | 0.000427708 | 2617.1  | 7595.65 | 2.90232  |
|         |             |         |         |          | 3.59802E-10 | 12133.8 | 37842.8 | 3.11878  |



|         |             |         |         |          |             |         |         |          |
|---------|-------------|---------|---------|----------|-------------|---------|---------|----------|
|         |             |         |         |          | 2.17245E-07 | 4893.75 | 10321.7 | 2.10916  |
|         | 2.45648E-05 | 5170.28 | 10381.6 | 2.00793  | 1.00862E-08 | 2909.7  | 8499.35 | 2.92104  |
|         | 6.03103E-05 | 1803.8  | 3747.25 | 2.07742  |             |         |         |          |
|         | 3.52497E-05 | 1308    | 2871.25 | 2.19515  |             |         |         |          |
|         | 0.000728748 | 724.033 | 307.35  | -2.35573 | 0.000240425 | 946.267 | 367.95  | -2.57173 |
|         |             |         |         |          | 4.99499E-06 | #DIV/0! | 2326.7  | #DIV/0!  |
|         |             |         |         |          | 0.00395202  | #DIV/0! | 1258.5  | #DIV/0!  |
|         |             |         |         |          | 0.00633958  | #DIV/0! | 767.3   | #DIV/0!  |
|         |             |         |         |          | 1.26845E-09 | #DIV/0! | 3622.95 | #DIV/0!  |
| -3.9661 | 3.67029E-05 | 15184.8 | 3449.28 | -4.4023  |             |         |         |          |
| -4.1642 | 3.84113E-07 | 3607.7  | 860.55  | -4.19232 |             |         |         |          |
| -3.3862 |             |         |         |          | 1.44757E-08 | #DIV/0! | 2139.7  | #DIV/0!  |
|         |             |         |         |          | 0.00570431  | #DIV/0! | 2567.63 | #DIV/0!  |
|         | 0.0022506   | 829.525 | 1701.13 | 2.05072  |             |         |         |          |
|         |             |         |         |          | 0.00945581  | 1209.9  | 258.2   | -4.6859  |
|         |             |         |         |          | 0.00221959  | 1670.75 | 544.633 | -3.06766 |
|         |             |         |         |          | 0.0111628   | 1681.83 | 523.533 | -3.21245 |
| #DIV/0! | 5.72023E-08 | 1418.88 | #DIV/0! | #DIV/0!  |             |         |         |          |
|         | 4.21263E-07 | 1086.45 | 345.7   | -3.14275 | 1.36206E-05 | 2216.1  | 762     | -2.90827 |
|         |             |         |         |          | 0.000662968 | 1375.38 | 650.45  | -2.1145  |
|         | 0.000089825 | 750.4   | 363.967 | -2.06173 | 3.68008E-05 | 1396.75 | 615.733 | -2.26843 |
|         |             |         |         |          | 0.000143565 | 1702.08 | 637.35  | -2.67055 |
|         |             |         |         |          | 0.000388721 | 2781    | 1106.2  | -2.51401 |
|         | 0.00819576  | 827.7   | 232.7   | -3.55694 |             |         |         |          |
|         | 1.4889E-07  | 1862.78 | 840.5   | -2.21627 | 0.00411186  | 1618.7  | 531.6   | -3.04496 |
|         |             |         |         |          | 2.87279E-06 | 2040.83 | 902.925 | -2.26024 |
|         | 6.51916E-07 | 1309.73 | 525.5   | -2.49234 |             |         |         |          |
|         | 0.000120923 | 567.967 | 267.35  | -2.12443 | 0.00689409  | 2730.03 | 674.5   | -4.04749 |
|         |             |         |         |          | 0.000596992 | 3331.83 | 538.25  | -6.19011 |
|         |             |         |         |          | 0.00620323  | 2579.3  | 489.275 | -5.27168 |
|         |             |         |         |          | 0.00285416  | 1450.13 | 464.733 | -3.12036 |
|         | 0.000648027 | 2620.58 | 987.45  | -2.65388 |             |         |         |          |
| -2.1668 | 4.0283E-07  | 1531.95 | 580.925 | -2.63709 |             |         |         |          |
|         | 0.00642543  | 523.225 | 261.167 | -2.00341 | 1.2546E-07  | 709.5   | 2152.35 | 3.03362  |
| 4.36293 | 1.86982E-07 | 647.367 | 2097.2  | 3.23959  | 4.17448E-08 | 6048.73 | 1320.28 | -4.58141 |
| -5.2992 | 3.32885E-10 | 5077.5  | 787.567 | -6.44707 |             |         |         |          |
|         | 9.94801E-06 | 973.275 | 202.2   | -4.81343 | 0.000133138 | 1414.7  | 543.167 | -2.60454 |
|         | 8.70241E-05 | 717.075 | 290.833 | -2.46559 | 6.47312E-10 | 5230.08 | 18444   | 3.52653  |
|         |             |         |         |          | 1.04214E-07 | #DIV/0! | 2358.73 | #DIV/0!  |
| -2.0643 |             |         |         |          |             |         |         |          |
| 2.6205  | 1.67142E-21 | 4135.38 | 17078.4 | 4.12982  | 2.98203E-20 | 3825.4  | 13676.6 | 3.57521  |
| -2.3493 | 0.00683267  | 784.333 | #DIV/0! | #DIV/0!  |             |         |         |          |
|         |             |         |         |          | 4.58753E-08 | 1510.43 | 518.6   | -2.9125  |
|         | 3.07019E-05 | 1631.43 | 3365.5  | 2.06292  |             |         |         |          |
| #DIV/0! | 1.94899E-11 | #DIV/0! | 2944.75 | #DIV/0!  | 1.26529E-07 | #DIV/0! | 1486.93 | #DIV/0!  |
|         | 7.29041E-07 | 1539.9  | 648.175 | -2.37575 |             |         |         |          |
|         |             |         |         |          | 0.00749283  | #DIV/0! | 1660.35 | #DIV/0!  |
| -2.439  |             |         |         |          |             |         |         |          |
| 2.84824 | 2.24525E-12 | 5980.6  | 30717.8 | 5.13623  | 2.02526E-19 | 3014.43 | 40990.6 | 13.5981  |
|         |             |         |         |          | 1.05528E-06 | 12923.8 | 4176.25 | -3.0946  |
|         |             |         |         |          | 0.0200604   | #DIV/0! | 1102.65 | #DIV/0!  |
|         | 6.76714E-08 | 4953.5  | 15665.3 | 3.16246  | 3.47605E-08 | 4522.68 | 15053.7 | 3.3285   |
| -2.277  | 6.32781E-05 | 2679.2  | 1235.93 | -2.16777 |             |         |         |          |
|         | 2.33552E-06 | 4961.33 | 12820.1 | 2.58401  | 5.89778E-16 | 1267.1  | 19943.7 | 15.7396  |
| -2.1498 |             |         |         |          |             |         |         |          |
|         | 6.23689E-05 | 1085.73 | 393.833 | -2.75681 | 0.000554124 | 1706.1  | 734.425 | -2.32304 |
|         |             |         |         |          | 0.00120842  | 1224.4  | 466.933 | -2.62222 |
|         | 0.005675    | 763.3   | 164.7   | -4.63449 | 0.00497951  | 1898.43 | 790.75  | -2.4008  |
|         |             |         |         |          | 2.21992E-06 | 1668.15 | 433.45  | -3.84854 |

|         |             |         |         |          |             |         |         |          |
|---------|-------------|---------|---------|----------|-------------|---------|---------|----------|
|         |             |         |         |          | 0.00486263  | 1058.65 | 417.967 | -2.53286 |
| -5.3334 | 0.000257835 | 1400.65 | 391.175 | -3.58062 | 0.000165419 | 1311.2  | 593     | -2.21113 |
|         |             |         |         |          | 0.000412566 | 1052.58 | 332.85  | -3.16231 |
|         |             |         |         |          | 2.96198E-05 | 1543.57 | #DIV/0! | #DIV/0!  |
|         |             |         |         |          | 2.33843E-07 | 1482.78 | 423.7   | -3.49959 |
|         | 8.99114E-05 | 1031.88 | 260.667 | -3.9586  | 6.94222E-06 | 2623.63 | 616.925 | -4.25275 |
|         |             |         |         |          | 0.0114955   | 2254.68 | 652.575 | -3.45504 |
|         | 2.92987E-05 | 2059.58 | 6311.5  | 3.06447  | 1.15362E-07 | 2973.1  | 6985.43 | 2.34954  |
|         | 8.3712E-07  | 2486.1  | 5231.43 | 2.10427  | 1.16903E-11 | 1623.6  | 6307.8  | 3.88507  |
|         |             |         |         |          |             |         |         |          |
|         | 3.45776E-05 | 1760.1  | 4328.25 | 2.45909  | 3.59051E-09 | 1641.9  | 4043.7  | 2.46282  |
|         | 2.43696E-08 | 1671.85 | 603.7   | -2.76934 |             |         |         |          |
| -3.4704 | 3.6383E-06  | 1563.65 | 507.9   | -3.07866 |             |         |         |          |
| -2.3478 | 6.70245E-10 | 978.45  | 337.833 | -2.89625 |             |         |         |          |
|         |             |         |         |          | 0.00525491  | 1634.9  | 700.125 | -2.33515 |
| -2.0904 |             |         |         |          |             |         |         |          |
| 2.31964 | 2.45724E-05 | #DIV/0! | 1482.47 | #DIV/0!  | 5.12237E-13 | #DIV/0! | 1298.27 | #DIV/0!  |
|         |             |         |         |          | 0.000114825 | 1560.23 | #DIV/0! | #DIV/0!  |
|         |             |         |         |          | 2.08897E-07 | 3014.45 | 1252.4  | -2.40694 |
|         |             |         |         |          | 0.00328681  | 1029.68 | #DIV/0! | #DIV/0!  |
|         |             |         |         |          | 0.00160058  | 964.2   | 308.133 | -3.12916 |
|         |             |         |         |          |             |         |         |          |
|         | 2.51347E-05 | 1878    | 915.825 | -2.05061 |             |         |         |          |
|         | 0.0120469   | #DIV/0! | 2082.28 | #DIV/0!  |             |         |         |          |
|         |             |         |         |          |             |         |         |          |
|         |             |         |         |          | 7.58026E-05 | 2666.4  | 6907.03 | 2.59039  |
|         |             |         |         |          | 3.70419E-07 | 11540.9 | 37850.8 | 3.27972  |
|         |             |         |         |          | 3.26119E-11 | 11277.7 | 43377.6 | 3.84632  |
|         |             |         |         |          | 2.64641E-07 | 4570.83 | 1518.9  | -3.0093  |
|         |             |         |         |          | 6.78964E-16 | 35082.3 | 100532  | 2.8656   |
|         |             |         |         |          | 0.006023    | 1108.63 | 535     | -2.07221 |
|         |             |         |         |          | 1.49835E-10 | 6661.98 | 14508.6 | 2.17782  |
|         |             |         |         |          | 2.84169E-09 | 4936.03 | 13683.6 | 2.7722   |
|         | 1.87988E-07 | 9364.5  | 23792.1 | 2.54067  | 4.10634E-15 | 3665.55 | 18449.1 | 5.0331   |
| 4.91197 | 1.43545E-05 | 1248.6  | 5672.78 | 4.54331  | 4.39765E-05 | 1806.17 | 7134.25 | 3.94994  |
|         |             |         |         |          | 0.000646651 | #DIV/0! | 6108.53 | #DIV/0!  |
|         |             |         |         |          | 0.000260549 | 1340.33 | 251.2   | -5.33569 |
|         |             |         |         |          | 0.000379607 | 2861.9  | 577.4   | -4.95653 |
|         | 0.00157666  | 1168.15 | 376.967 | -3.09882 | 5.84092E-06 | 2779.65 | 637.333 | -4.36138 |
|         |             |         |         |          | 0.0050872   | #DIV/0! | 3206.23 | #DIV/0!  |
|         |             |         |         |          | 1.48206E-06 | 1404.87 | #DIV/0! | #DIV/0!  |
|         | 6.6229E-08  | 987.3   | 301.567 | -3.2739  | 1.43877E-08 | 1290.8  | 422.1   | -3.05804 |
|         | 3.99805E-07 | 1709.75 | 742.85  | -2.30161 | 4.05372E-09 | 3357.3  | 1163.23 | -2.88618 |
|         | 0.000439776 | 809.6   | 350.767 | -2.30809 | 0.000137371 | 1167.9  | 441.3   | -2.6465  |
|         |             |         |         |          | 0.00104243  | 973.167 | 316.8   | -3.07186 |
| -2.6034 | 4.47978E-06 | 1111.53 | 430.6   | -2.58134 |             |         |         |          |
|         |             |         |         |          |             |         |         |          |
|         |             |         |         |          | 3.07663E-06 | #DIV/0! | 1565.4  | #DIV/0!  |
|         | 0.000359707 | #DIV/0! | 617.9   | #DIV/0!  |             |         |         |          |
| -2.6949 | 1.40115E-06 | 1434.35 | 567.3   | -2.52838 | 2.62298E-07 | 1352.98 | 462.375 | -2.92614 |
| -3.895  | 1.02425E-07 | 3843.15 | 623.7   | -6.16186 |             |         |         |          |
|         | 3.73329E-08 | 1770.83 | 637.333 | -2.77849 |             |         |         |          |
|         |             |         |         |          | 0.000138698 | 2152.7  | 5137.93 | 2.38674  |
| 47.9792 | 8.54138E-17 | 1616.35 | 99471.3 | 61.5407  | 8.32304E-16 | 5612.58 | 133590  | 23.8019  |
|         |             |         |         |          | 0.000844748 | 1711.25 | 453.5   | -3.77343 |
|         | 0.015833    | 778.6   | 330.6   | -2.35511 | 0.00275623  | 2065.58 | 590.975 | -3.4952  |
|         |             |         |         |          | 3.24901E-06 | 1289.65 | 408.2   | -3.15936 |
|         |             |         |         |          | 0.000276232 | 4034.5  | 556.5   | -7.24978 |
|         |             |         |         |          | 0.0126956   | 3363.93 | 937.633 | -3.58768 |
| -2.4456 | 1.70006E-12 | 5328.68 | 1443.38 | -3.69182 |             |         |         |          |
|         | 2.21005E-08 | 70608.5 | 28532.8 | -2.47464 |             |         |         |          |
|         |             |         |         |          | 8.69821E-08 | 3908.78 | 9543.15 | 2.44147  |
|         | 0.000583931 | 1242.8  | 212.8   | -5.84023 | 0.00037965  | 1941.43 | 477.65  | -4.06453 |
|         | 2.73123E-05 | 1278.37 | #DIV/0! | #DIV/0!  |             |         |         |          |
|         | 0.00337788  | 1210.3  | 586.375 | -2.06404 |             |         |         |          |

|             |             |         |          |          |             |         |         |          |
|-------------|-------------|---------|----------|----------|-------------|---------|---------|----------|
|             |             |         |          |          | 0.000796362 | 1019.07 | #DIV/0! | #DIV/0!  |
|             |             |         |          |          | 0.000493672 | 4806.5  | 11476.4 | 2.38768  |
|             |             |         |          |          | 1.94584E-05 | 1975.73 | 5012.23 | 2.5369   |
|             |             |         |          |          | 2.63487E-05 | 5414.58 | 12015   | 2.21902  |
|             |             |         |          |          | 3.23211E-11 | 27182.3 | 88204   | 3.2449   |
|             |             |         |          |          | 1.12569E-07 | 2694.18 | 5859.2  | 2.17477  |
|             |             |         |          |          | 0.0018913   | #DIV/0! | 2194.73 | #DIV/0!  |
|             |             |         |          |          | 5.28689E-06 | 1344.1  | 505.05  | -2.66132 |
|             |             |         |          |          | 0.00286996  | 2053.65 | 421.533 | -4.87186 |
|             |             |         |          |          | 0.0191628   | 1139.8  | #DIV/0! | #DIV/0!  |
| 1.01118E-05 | 1321.58     | 386.275 | -3.42133 |          | 6.53211E-06 | 2198.73 | 662.733 | -3.31766 |
|             |             |         |          |          | 4.10431E-06 | 660.35  | 239.55  | -2.75663 |
| 0.000185161 | 1036.1      | #DIV/0! | #DIV/0!  |          |             |         |         |          |
|             |             |         |          |          | 3.02288E-11 | 4928.35 | 12631.4 | 2.56301  |
|             |             |         |          |          | 0.015161    | 1481.6  | #DIV/0! | #DIV/0!  |
| 1.45363E-07 | 8251.75     | 2505.88 | -3.29296 |          |             |         |         |          |
| 0.00343592  | 668.8       | #DIV/0! | #DIV/0!  |          | 5.42286E-05 | 1541.83 | 511.2   | -3.01609 |
| 8.34512E-05 | 1155.1      | 400.575 | -2.8836  |          | 0.00281287  | 1661.95 | 773.625 | -2.14826 |
| 0.00478959  | 1230.58     | 508.267 | -2.42112 |          |             |         |         |          |
| 0.00138743  | 1101.7      | 500.9   | -2.19944 |          |             |         |         |          |
|             |             |         |          |          | 3.50378E-08 | 4215.35 | 10100.7 | 2.39617  |
|             |             |         |          |          | 1.52625E-07 | 3495.93 | 8472.05 | 2.42341  |
|             |             |         |          |          | 1.04316E-11 | 4937.83 | 12740.1 | 2.5801   |
| 3.81707E-09 | 8755.98     | 20293.1 | 2.31762  |          | 2.90316E-13 | 5105.53 | 15415.2 | 3.01931  |
| 2.69293E-08 | 13418.7     | 32333.6 | 2.40959  |          | 3.02937E-16 | 4689.85 | 26663.1 | 5.68527  |
| 5.95806E-08 | 12909.2     | 34014.1 | 2.63487  |          | 8.43211E-15 | 4372.3  | 25915.9 | 5.92729  |
|             |             |         |          |          | 0.0173275   | #DIV/0! | 1002.67 | #DIV/0!  |
|             |             |         |          |          | 0.00326828  | 2420.1  | 766.1   | -3.15899 |
|             |             |         |          |          | 0.00321611  | 1494.1  | 557.967 | -2.67776 |
|             |             |         |          |          | 0.000740724 | #DIV/0! | 2267.9  | #DIV/0!  |
| -2.0372     | 1.56941E-08 | 1339.03 | 342.05   | -3.91471 | 1.90228E-08 | 1989.63 | 337.95  | -5.88734 |
| -3.243      | 4.9242E-08  | 3205.43 | 1005.9   | -3.18662 | 1.50851E-08 | 3531.1  | 1018.2  | -3.46798 |
| -4.2924     | 6.38479E-09 | 4418.9  | 952.425  | -4.63963 | 2.9812E-06  | 2923.63 | 1036    | -2.82203 |
| -3.6975     | 2.41529E-11 | 14632.4 | 4509.28  | -3.24495 |             |         |         |          |
| -4.9226     | 2.83591E-06 | 4512    | 1596.08  | -2.82693 |             |         |         |          |
|             |             |         |          |          | 7.97594E-13 | 3834.1  | 10148.8 | 2.64698  |
|             |             |         |          |          | 1.23976E-12 | 4888.9  | 14908.2 | 3.0494   |
|             |             |         |          |          | 1.45949E-12 | 2925.3  | 10034.7 | 3.4303   |
|             |             |         |          |          | 7.21573E-05 | #DIV/0! | 1543.75 | #DIV/0!  |
| -4.3544     | 3.27322E-12 | 1680.7  | 408.9    | -4.1103  | 3.00171E-07 | 1623.43 | 681.2   | -2.38318 |
| -4.4013     | 9.08875E-09 | 2064.23 | 629.2    | -3.28071 |             |         |         |          |
|             | 6.70076E-05 | 1286.33 | 397.1    | -3.2393  | 0.000449548 | 2225.4  | 794.875 | -2.79969 |
| -2.8249     | 0.000186398 | 12032.7 | 5578.38  | -2.15702 | 7.95933E-06 | 1728.5  | 4805.25 | 2.78001  |
| -2.9435     | 0.000938686 | 13042.6 | 4071.13  | -3.20367 |             |         |         |          |
|             |             |         |          |          | 2.45424E-05 | 3017.43 | 1122.55 | -2.68802 |
|             |             |         |          |          | 0.000015317 | 1249.7  | 346.5   | -3.60664 |
| -3.3376     | 6.14154E-10 | 19724   | 4941.35  | -3.99163 | 1.92928E-05 | 14563.9 | 6379.6  | -2.28288 |
|             |             |         |          |          | 0.0084006   | 1457.23 | #DIV/0! | #DIV/0!  |
|             | 4.42959E-07 | 1413.93 | #DIV/0!  | #DIV/0!  | 5.27809E-14 | 4121.63 | #DIV/0! | #DIV/0!  |
| 2.2955      | 1.37109E-07 | 4800.65 | 16188.9  | 3.37223  |             |         |         |          |
|             |             |         |          |          | 0.00480538  | 862.667 | 350.067 | -2.46429 |
|             |             |         |          |          | 0.000737618 | 1153.75 | 347.725 | -3.318   |
|             |             |         |          |          | 3.2933E-08  | 2451.2  | 6620.95 | 2.70111  |
| -2.3165     |             |         |          |          |             |         |         |          |
|             |             |         |          |          | 3.7422E-13  | 2664.65 | 7211.93 | 2.70652  |
|             |             |         |          |          | 3.58846E-18 | 7552.3  | 23180.1 | 3.06927  |
|             | 0.00949064  | 2758.98 | 6157.58  | 2.23183  | 2.32308E-05 | 1926.7  | 4775.8  | 2.47875  |
|             |             |         |          |          | 2.40358E-15 | 14106.4 | 65287.6 | 4.62823  |
|             |             |         |          |          | 0.00110808  | 2246.53 | 865.425 | -2.59587 |
|             |             |         |          |          | 1.77195E-05 | 1859.73 | 886.9   | -2.09689 |
|             |             |         |          |          | 5.04827E-14 | 6522.15 | 17073.6 | 2.61779  |
|             |             |         |          |          | 1.24452E-12 | 3927.38 | 8961.95 | 2.28192  |
|             |             |         |          |          | 0.0112164   | 1272.48 | 584.9   | -2.17554 |

|         |             |         |         |          |             |             |         |          |        |
|---------|-------------|---------|---------|----------|-------------|-------------|---------|----------|--------|
| -2.3191 |             |         |         |          |             | 3.75795E-09 | 4649.63 | 13182.6  | 2.8352 |
| 2.99204 | 9.63809E-06 | 417     | 2223.83 | 5.33291  | 0.000245672 | 756.4       | 2432.78 | 3.21625  |        |
| 5.09887 | 8.78419E-07 | 580.6   | 2589.9  | 4.46073  | 3.97071E-05 | 724.3       | 3045.7  | 4.20503  |        |
| 2.49669 | 9.11823E-16 | 7196.88 | 43164.3 | 5.99764  | 5.50655E-18 | 6522.95     | 48718.1 | 7.46872  |        |
|         | 7.30652E-07 | 2077.6  | 7596.53 | 3.65639  | 2.55598E-09 | 1357.48     | 7000.5  | 5.157    |        |
|         | 1.12189E-05 | 1417.48 | 3724.65 | 2.62767  |             |             |         |          |        |
| -2.4118 | 0.000883557 | 45145.3 | 11335.8 | -3.98253 |             |             |         |          |        |
| -2.3617 | 0.00151711  | 48962.9 | 13616.7 | -3.59581 |             |             |         |          |        |
|         | 4.56971E-07 | #DIV/0! | 906.967 | #DIV/0!  | 8.61832E-05 | 3744.48     | 1050.23 | -3.56537 |        |
|         |             |         |         |          | 1.73127E-09 | #DIV/0!     | 1519.73 | #DIV/0!  |        |
|         |             |         |         |          | 1.23297E-09 | 5681.6      | 12256.7 | 2.15727  |        |
|         |             |         |         |          | 7.3846E-07  | 1437.48     | 670.433 | -2.1441  |        |
| -3.6666 | 2.78757E-09 | 17360   | 3798.35 | -4.5704  |             |             |         |          |        |
| -3.6151 | 4.82502E-11 | 20048.5 | 4577.18 | -4.3801  |             |             |         |          |        |
| -3.3786 | 1.91827E-07 | 8569.45 | 2530.75 | -3.38613 |             |             |         |          |        |
|         | 0.00380907  | 836.967 | 390     | -2.14607 |             |             |         |          |        |
|         |             |         |         |          | 1.06731E-06 | 9728.35     | 3771.93 | -2.57914 |        |
| -2.3864 | 0.000211698 | 1089.88 | 417.15  | -2.61267 |             |             |         |          |        |
|         |             |         |         |          | 0.000166034 | 1307.85     | 521.3   | -2.50882 |        |
|         |             |         |         |          | 0.000208839 | 1791.87     | 757.425 | -2.36573 |        |
|         | 0.000514462 | #DIV/0! | 855.667 | #DIV/0!  |             |             |         |          |        |
|         | 0.00160627  | 518.9   | #DIV/0! | #DIV/0!  |             |             |         |          |        |
|         |             |         |         |          | 4.02455E-05 | 802.633     | #DIV/0! | #DIV/0!  |        |
|         |             |         |         |          | 5.97105E-10 | 22280.4     | 49374.8 | 2.21607  |        |
|         |             |         |         |          | 0.00242141  | 1123.87     | #DIV/0! | #DIV/0!  |        |
| #DIV/0! | 4.20109E-06 | 2300.1  | #DIV/0! | #DIV/0!  | 5.06207E-10 | 2980.9      | 874.4   | -3.40908 |        |
|         | 3.2559E-06  | 1771.38 | #DIV/0! | #DIV/0!  |             |             |         |          |        |
|         | 0.000143089 | 3129.83 | 1441.85 | -2.1707  |             |             |         |          |        |
|         |             |         |         |          | 5.7418E-07  | 2754.2      | 855.05  | -3.2211  |        |
| -2.4122 | 9.31349E-07 | 3627.5  | 1301.1  | -2.78803 |             |             |         |          |        |
|         |             |         |         |          | 4.55539E-06 | 1572.83     | 737.567 | -2.13245 |        |
|         | 4.91139E-07 | 2751    | 896.875 | -3.06732 |             |             |         |          |        |
|         | 0.00373846  | 818.05  | 347.067 | -2.35704 | 0.000270489 | 1555.63     | 541.433 | -2.87316 |        |
|         |             |         |         |          | 0.000109419 | 1341.4      | 480.5   | -2.79168 |        |
|         |             |         |         |          | 5.59367E-05 | 1593.3      | 708.6   | -2.24852 |        |
| #DIV/0! |             |         |         |          |             |             |         |          |        |
|         |             |         |         |          | 0.00601275  | 1609.3      | 582     | -2.76512 |        |
|         |             |         |         |          | 1.25223E-06 | 4094.48     | 1071.55 | -3.82108 |        |
|         |             |         |         |          | 0.000369098 | 1574.93     | 579.167 | -2.71929 |        |
|         |             |         |         |          | 2.11005E-05 | #DIV/0!     | 3170.25 | #DIV/0!  |        |
|         | 0.000603408 | 725.567 | #DIV/0! | #DIV/0!  | 4.91241E-06 | 1875.17     | #DIV/0! | #DIV/0!  |        |
|         | 0.00205451  | 1519.43 | 720.733 | -2.10817 |             |             |         |          |        |
|         |             |         |         |          | 0.000860711 | #DIV/0!     | 1311.8  | #DIV/0!  |        |
| -2.5511 |             |         |         |          |             |             |         |          |        |
|         | 0.000530623 | 685.025 | 189.2   | -3.62064 | 0.0218089   | #DIV/0!     | 572.6   | #DIV/0!  |        |
| -2.2665 | 0.000895289 | 1767.38 | 735.533 | -2.40285 |             |             |         |          |        |
|         | 0.0106801   | 776.267 | 310.2   | -2.50247 |             |             |         |          |        |
|         |             |         |         |          | 0.000362155 | 1355.6      | 592.5   | -2.28793 |        |
|         | 5.80855E-06 | 717.15  | 220     | -3.25977 | 4.2541E-07  | 1664.48     | 378.533 | -4.39717 |        |
|         | 6.04034E-05 | 1626    | #DIV/0! | #DIV/0!  |             |             |         |          |        |
|         |             |         |         |          | 0.000220608 | 1418.8      | 599.425 | -2.36693 |        |
|         |             |         |         |          | 0.0201774   | 751.95      | 305.775 | -2.45916 |        |
|         | 0.00238761  | 690.167 | 299.5   | -2.3044  |             |             |         |          |        |
|         |             |         |         |          | 0.000860717 | 8001.25     | 1681.33 | -4.7589  |        |
|         |             |         |         |          | 0.00124392  | 3924.53     | 906.7   | -4.32836 |        |
|         |             |         |         |          | 0.016233    | 1128.68     | 396.5   | -2.8466  |        |
|         |             |         |         |          | 1.52471E-10 | 9743.08     | 2129.23 | -4.57588 |        |
|         | 1.30811E-07 | 1798.43 | 669.975 | -2.68432 | 3.51979E-11 | 3906.78     | 956.8   | -4.08317 |        |
| -2.476  |             |         |         |          |             |             |         |          |        |
|         | 3.00599E-06 | 3027    | 1284.48 | -2.3566  |             |             |         |          |        |



|         |             |         |         |          |             |         |         |          |
|---------|-------------|---------|---------|----------|-------------|---------|---------|----------|
|         |             |         |         |          | 3.36739E-07 | 14005.9 | 30165.9 | 2.1538   |
|         | 4.99191E-07 | 14630   | 32547.4 | 2.22471  | 2.55132E-12 | 5361.8  | 19331.3 | 3.60537  |
|         | 0.000185456 | 789.033 | 275.6   | -2.86297 |             |         |         |          |
|         | 1.07998E-07 | 3741.8  | 1588.63 | -2.35537 |             |         |         |          |
|         |             |         |         |          | 0.000910068 | 1615.18 | 415.55  | -3.88684 |
|         | 0.0155708   | 576.633 | 213.1   | -2.70593 |             |         |         |          |
|         |             |         |         |          | 0.000172566 | 1740.38 | 807.1   | -2.15633 |
|         |             |         |         |          | 3.96567E-06 | 1947.6  | 779.725 | -2.4978  |
|         | 0.00117077  | 2432.18 | 705.35  | -3.44818 | 0.00005561  | 2547.63 | 1057.47 | -2.40918 |
| -2.3802 | 7.87375E-07 | 1238.73 | 344.9   | -3.59155 | 2.83206E-11 | 1606.27 | #DIV/0! | #DIV/0!  |
|         |             |         |         |          | 0.0013821   | 1831.4  | 539.775 | -3.3929  |
|         | 0.00216972  | 1150.83 | 406.4   | -2.83175 | 9.40904E-07 | 1636.9  | 365.3   | -4.48097 |
|         |             |         |         |          | 0.00072851  | 2303.15 | 724.85  | -3.17742 |
|         |             |         |         |          | 0.00358946  | #DIV/0! | 1482    | #DIV/0!  |
|         |             |         |         |          | 0.0197684   | 797.2   | #DIV/0! | #DIV/0!  |
|         |             |         |         |          | 0.00661383  | 1452.13 | 587.45  | -2.47191 |
|         |             |         |         |          | 0.015158    | 1427.7  | 401.367 | -3.5571  |
|         | 4.09914E-06 | 1736.65 | 4389.13 | 2.52735  | 0.000020637 | 2001.9  | 4309.3  | 2.15261  |
|         | 5.73682E-05 | 1383.93 | 637.725 | -2.1701  |             |         |         |          |
|         | 3.89594E-05 | 2488.33 | 1169.2  | -2.12823 |             |         |         |          |
| 2.39136 |             |         |         |          |             |         |         |          |
|         |             |         |         |          | 6.05097E-06 | 1878.43 | 755.525 | -2.48625 |
| -3.3854 | 4.87565E-06 | 1071.25 | 285.85  | -3.74759 | 1.27772E-05 | 894.025 | 338.8   | -2.6388  |
| -2.7565 | 0.000314017 | 872.95  | 380.225 | -2.29588 | 0.00419112  | 1126.17 | 548.167 | -2.05442 |
|         | 7.89826E-07 | 1830.78 | 812.15  | -2.25423 | 1.43442E-13 | 3826.68 | 1014.35 | -3.77254 |
|         |             |         |         |          | 1.44524E-10 | 4259.78 | 1412.6  | -3.01556 |
|         |             |         |         |          | 2.85788E-06 | 2048.9  | 692.975 | -2.95667 |
|         | 3.68827E-05 | 3686.7  | 1768.88 | -2.08421 | 2.09843E-08 | 3335.28 | 1252.75 | -2.66236 |
|         |             |         |         |          | 3.01559E-05 | 1352.48 | 653.725 | -2.06887 |
|         |             |         |         |          | 2.38208E-07 | 3337.2  | 790.05  | -4.22404 |
|         |             |         |         |          | 0.000329425 | 1924.88 | 719.4   | -2.67567 |
|         |             |         |         |          | 0.00639145  | 742.967 | 281.2   | -2.64213 |
|         |             |         |         |          | 0.00179235  | 1025.5  | 487.4   | -2.10402 |
|         | 0.00180798  | 1125.23 | 548.467 | -2.05158 |             |         |         |          |
| 3.28902 | 2.47159E-10 | 3747.33 | 22688.9 | 6.05469  | 2.7576E-10  | 3413.7  | 18030.2 | 5.28172  |
|         |             |         |         |          | 5.53124E-05 | 1253.03 | 559.575 | -2.23926 |
|         | 0.000346116 | 1546.45 | 702.275 | -2.20206 |             |         |         |          |
|         | 0.00394345  | 1107.88 | 457.1   | -2.4237  |             |         |         |          |
| -2.4338 |             |         |         |          |             |         |         |          |
| -2.0788 | 1.1132E-08  | 4614.88 | 1745.33 | -2.64414 | 4.31265E-07 | 4696.55 | 2201.45 | -2.13339 |
| -2.382  | 7.23165E-07 | 4614.83 | 1773.7  | -2.60181 | 2.70064E-05 | 4601.08 | 2240.03 | -2.05403 |
| -2.3692 |             |         |         |          |             |         |         |          |
|         |             |         |         |          | 4.52678E-09 | 3453.25 | 10778   | 3.12113  |
| -2.1115 | 6.05947E-07 | 2785.35 | 1286.8  | -2.16456 |             |         |         |          |
|         | 0.00109021  | 835.825 | 414.6   | -2.01598 |             |         |         |          |
|         |             |         |         |          | 5.88945E-06 | 3857.45 | 8204.23 | 2.12685  |
|         |             |         |         |          | 0.0025395   | #DIV/0! | 1885.95 | #DIV/0!  |
|         | 0.000563993 | 723.667 | 149.2   | -4.85031 |             |         |         |          |
|         | 0.000670057 | 1412.53 | #DIV/0! | #DIV/0!  |             |         |         |          |
|         |             |         |         |          | 0.000336663 | 1307.3  | 592.7   | -2.20567 |
|         |             |         |         |          | 3.43845E-09 | 1466.6  | 3219.85 | 2.19545  |
|         |             |         |         |          | 1.02763E-11 | 5614.73 | 13474.6 | 2.39986  |
|         |             |         |         |          | 2.42845E-14 | #DIV/0! | 2745.07 | #DIV/0!  |
| 3.73828 | 5.11252E-15 | 2566.8  | 18274.2 | 7.11944  | 2.37557E-15 | 3199.43 | 21434.7 | 6.69955  |
| 3.89373 | 1.44343E-13 | 4072    | 34098.4 | 8.37386  | 8.6396E-15  | 3780.98 | 35568.4 | 9.4072   |
|         |             |         |         |          | 7.69529E-12 | 3834.18 | 12465.7 | 3.25121  |
|         |             |         |         |          | 0.019401    | 1112.07 | 486     | -2.2882  |
|         | 2.80661E-05 | 1303.23 | 307.5   | -4.23816 | 0.0120014   | 1995.9  | 753.6   | -2.64849 |
|         | 2.74989E-07 | 3209.98 | 1353.3  | -2.37196 | 1.97262E-06 | 3928.78 | 1883.9  | -2.08545 |
|         | 0.000150702 | 1432.73 | 608.85  | -2.35317 |             |         |         |          |
|         | 0.00174073  | 1029.85 | 343.95  | -2.99419 | 2.96368E-05 | 1547.2  | 589.6   | -2.62415 |
|         | 2.35609E-06 | 1072.6  | 358.575 | -2.99128 | 3.79028E-05 | 1481.43 | 613.933 | -2.41301 |
|         | 1.92268E-08 | 956.925 | 380.15  | -2.51723 |             |         |         |          |

|         |             |         |         |          |             |         |         |          |
|---------|-------------|---------|---------|----------|-------------|---------|---------|----------|
| #DIV/0! | 1.7258E-07  | #DIV/0! | 3349.93 | #DIV/0!  | 0.00839263  | #DIV/0! | 4384.78 | #DIV/0!  |
|         |             |         |         |          | 0.0110972   | #DIV/0! | 1772.95 | #DIV/0!  |
|         |             |         |         |          | 6.95273E-05 | 1910.45 | 498.7   | -3.83086 |
|         |             |         |         |          | 0.00106112  | 1155.23 | 457.25  | -2.52646 |
|         |             |         |         |          | 5.06041E-05 | 1847    | 643.65  | -2.86957 |
|         | 0.000843902 | 731.425 | 308.15  | -2.3736  |             |         |         |          |
|         | 7.77402E-05 | 1396.3  | 673.85  | -2.07212 |             |         |         |          |
| #DIV/0! |             |         |         |          |             |         |         |          |
| -2.4365 | 1.36746E-07 | 1002.85 | 372.5   | -2.69221 |             |         |         |          |
|         | 0.000213201 | 22799.4 | 6235.55 | -3.65636 | 1.03527E-10 | 13637.4 | 1008.1  | -13.5278 |
|         | 5.81878E-08 | 18309.7 | 7011.1  | -2.61153 | 8.79778E-08 | 11016.2 | 4438.78 | -2.48181 |
|         |             |         |         |          | 1.2408E-08  | 24301.6 | 72141.3 | 2.96859  |
|         |             |         |         |          | 7.81938E-09 | 21675.3 | 69576.9 | 3.20996  |
| 2.90591 | 4.04632E-08 | 4947.53 | 28409.4 | 5.74213  |             |         |         |          |
| -2.4823 | 0.000104991 | 1274.23 | #DIV/0! | #DIV/0!  |             |         |         |          |
| #DIV/0! |             |         |         |          |             |         |         |          |
| 2.20851 | 8.62454E-08 | 24144.8 | 81666.6 | 3.38237  | 5.63112E-17 | 8405.03 | 101717  | 12.102   |
|         |             |         |         |          | 6.5912E-06  | 2600.4  | 6226.75 | 2.39454  |
|         | 0.00034427  | 17832.3 | 36027.5 | 2.02036  | 1.34883E-10 | 10703.3 | 46303.8 | 4.32611  |
|         | 0.000888765 | 2542.73 | 887.633 | -2.86461 | 0.00062487  | 3082.33 | 1005.45 | -3.06562 |
|         |             |         |         |          | 0.0139934   | 1893.58 | 429     | -4.41393 |
|         | 0.000017795 | 1728.08 | 817.533 | -2.11377 |             |         |         |          |
|         |             |         |         |          |             |         |         |          |
| -2.2285 | 7.77291E-09 | 6730.83 | 2020.47 | -3.33132 |             |         |         |          |
| -2.3429 | 2.81045E-10 | 7939.85 | 2649.3  | -2.99696 |             |         |         |          |
| -2.1302 | 1.1153E-08  | 4613.28 | 1877.13 | -2.45763 |             |         |         |          |
|         |             |         |         |          | 0.00155642  | 1029.97 | 301.4   | -3.41727 |
|         |             |         |         |          | 0.000050007 | 3317.6  | 695.675 | -4.76889 |
|         | 0.0156442   | 1544.5  | 526.525 | -2.93338 | 0.000287145 | 3678.25 | 1005.05 | -3.65977 |
|         | 5.57341E-06 | 2219.5  | 1076.23 | -2.0623  | 5.93277E-08 | 2858.08 | 1112.18 | -2.56981 |
|         |             |         |         |          | 6.25538E-09 | 5705.08 | 15825.4 | 2.77392  |
|         |             |         |         |          | 3.44846E-11 | 8576.88 | 30490.9 | 3.55502  |
|         |             |         |         |          | 3.94237E-10 | 5160.38 | 19100.8 | 3.70143  |
|         |             |         |         |          | 6.81946E-11 | 4233.88 | 18138.7 | 4.28418  |
|         | 4.85595E-11 | 3911.6  | 7842.55 | 2.00495  |             |         |         |          |
|         | 2.00162E-11 | 2192.33 | 4408.3  | 2.01079  |             |         |         |          |
|         | 3.84531E-05 | 1705.4  | 684.167 | -2.49267 | 4.00221E-06 | 2278.53 | 1083.1  | -2.10371 |
| -2.0621 | 1.85037E-06 | 1290.1  | 616.9   | -2.09126 | 3.82204E-09 | 1817.98 | 833.5   | -2.18113 |
|         |             |         |         |          | 0.0223281   | 918.475 | 146     | -6.29092 |
|         |             |         |         |          | 0.000650898 | 4827.83 | 1420.38 | -3.39898 |
| -5.8719 |             |         |         |          | 2.44093E-06 | 2124.65 | 596.775 | -3.56022 |
|         |             |         |         |          | 0.00703078  | 822.925 | 237.05  | -3.47152 |
| -2.1259 | 2.11542E-09 | 2672.5  | 867.05  | -3.08229 | 9.07961E-06 | 1851.13 | 872.875 | -2.12072 |
|         | 0.0155093   | 701.8   | 279.675 | -2.50934 | 0.000155551 | 1492.68 | 482.425 | -3.09411 |
|         |             |         |         |          | 0.00467863  | 1217.58 | 472.6   | -2.57633 |
|         | 7.08652E-06 | 12265.7 | 26276.2 | 2.14226  | 4.01702E-11 | 5230.63 | 18632.6 | 3.56222  |
|         | 0.000118512 | 2968.88 | 6694.78 | 2.25499  |             |         |         |          |
|         |             |         |         |          | 1.50585E-07 | 1689.03 | 658.133 | -2.56639 |
|         |             |         |         |          | 0.000333477 | 1147    | 148     | -7.75    |
|         |             |         |         |          | 7.95868E-06 | 2213.25 | 4807.4  | 2.1721   |
|         |             |         |         |          |             |         |         |          |
|         |             |         |         |          | 1.09238E-05 | 1238.25 | 3927.08 | 3.17147  |
|         | 3.75008E-07 | 29934.8 | 70133.9 | 2.34289  | 1.50174E-15 | 8891.73 | 55612.7 | 6.25444  |
|         | 9.6606E-09  | 11119.9 | 33436.1 | 3.00689  | 2.67591E-15 | 3057.03 | 22421   | 7.33425  |
|         |             |         |         |          | 0.0184662   | 522.6   | 143.9   | -3.63169 |
|         | 0.0006117   | 918.5   | #DIV/0! | #DIV/0!  |             |         |         |          |
|         |             |         |         |          | 1.0927E-10  | 2648.53 | 6557.63 | 2.47595  |
|         | 0.0001875   | 1747.45 | 4250.15 | 2.4322   |             |         |         |          |
|         |             |         |         |          | 7.15676E-12 | 36245.7 | 80062.3 | 2.20888  |
|         |             |         |         |          | 1.27848E-12 | 34496.5 | 80709.7 | 2.33965  |
|         |             |         |         |          | 0.000403143 | #DIV/0! | 1655.25 | #DIV/0!  |
|         |             |         |         |          | 0.000147182 | 4774.05 | 10185.3 | 2.13346  |

|         |             |         |         |          |             |         |         |          |
|---------|-------------|---------|---------|----------|-------------|---------|---------|----------|
|         |             |         |         |          | 2.3063E-11  | 39963.3 | 95701.9 | 2.39475  |
|         |             |         |         |          | 1.9594E-09  | 6727.15 | 19275.2 | 2.86528  |
|         |             |         |         |          | 1.13313E-07 | 2784.45 | 8577.1  | 3.08036  |
|         | 1.50861E-05 | 1049.8  | 505     | -2.07881 |             |         |         |          |
|         |             |         |         |          | 1.04625E-13 | 10188.7 | 37362.8 | 3.66708  |
|         | 0.00114456  | 985.667 | 491.5   | -2.00543 |             |         |         |          |
| -2.1977 | 1.11725E-05 | 1960.6  | 747.45  | -2.62305 | 0.000412035 | 2519.73 | 1106.65 | -2.27689 |
| -3.0724 |             |         |         |          |             |         |         |          |
|         |             |         |         |          | 0.00823089  | 1782.7  | #DIV/0! | #DIV/0!  |
|         |             |         |         |          | 0.00299763  | 1383.17 | 555.033 | -2.49204 |
|         |             |         |         |          | 1.89746E-05 | 5940.2  | 15444.2 | 2.59995  |
|         | 2.23673E-05 | 11796.2 | 28426.3 | 2.40979  | 2.14366E-09 | 13618.9 | 51140.6 | 3.75513  |
|         | 2.88224E-05 | 10047.7 | 24768.2 | 2.46506  | 7.03698E-09 | 12474.7 | 47100.4 | 3.77567  |
|         | 3.08421E-06 | 9601.3  | 28566.4 | 2.97526  | 4.30952E-09 | 11922.8 | 50636.5 | 4.24702  |
|         | 0.000566064 | #DIV/0! | 653.833 | #DIV/0!  |             |         |         |          |
| 3.50751 |             |         |         |          |             |         |         |          |
|         |             |         |         |          | 5.13438E-07 | 5848.35 | 15094.7 | 2.58101  |
|         | 3.58323E-05 | 5210.95 | 11672.5 | 2.23999  | 1.66879E-07 | 3281.03 | 8485.48 | 2.58622  |
|         |             |         |         |          | 0.00341967  | 1072.8  | 352.667 | -3.04197 |
| 3.64484 | 2.78852E-11 | 7848.03 | 39277.1 | 5.00471  | 2.78524E-13 | 6363.53 | 33352.2 | 5.24114  |
|         | 3.09705E-05 | 1105.35 | 402.233 | -2.74803 | 0.000128943 | 1952.45 | 724.15  | -2.6962  |
|         |             |         |         |          | 5.3093E-06  | 816.6   | #DIV/0! | #DIV/0!  |
|         | 0.000258265 | 961.425 | 399.6   | -2.40597 | 6.04429E-05 | 1652    | 547.775 | -3.01584 |
|         |             |         |         |          | 0.000151288 | 1148.55 | 463.2   | -2.4796  |
|         |             |         |         |          | 7.26987E-05 | 1267.83 | 555.275 | -2.28324 |
|         |             |         |         |          | 5.09056E-08 | 5011.48 | 16290.6 | 3.25066  |
|         |             |         |         |          | 0.000112675 | 1320.7  | 604.9   | -2.18334 |
|         |             |         |         |          | 3.25839E-06 | 1367.5  | 423     | -3.23286 |
|         |             |         |         |          | 0.000166432 | 2068.73 | 670.7   | -3.08444 |
|         |             |         |         |          | 2.18662E-06 | 1427.73 | 507.6   | -2.8127  |
|         |             |         |         |          | 0.013018    | 1232.53 | 503.633 | -2.44727 |
|         |             |         |         |          | 1.41964E-09 | 2151.05 | 5369.43 | 2.49619  |
|         |             |         |         |          | 9.86683E-10 | 5012.35 | 14134.7 | 2.81998  |
| -2.2641 | 1.98122E-08 | 1705.85 | 471.733 | -3.61613 | 4.76078E-05 | 1996.85 | 903.975 | -2.20897 |
|         |             |         |         |          | 0.0134394   | 794.2   | 243.25  | -3.26495 |
|         | 0.000149043 | 1197.3  | 358.05  | -3.34395 | 8.96644E-05 | 2222.2  | 788.45  | -2.81844 |
|         |             |         |         |          | 7.50089E-05 | 1149.67 | 387.8   | -2.96459 |
|         |             |         |         |          | 0.011107    | 929.7   | 402.433 | -2.3102  |
|         | 4.56023E-06 | 7455.18 | 24428.4 | 3.2767   | 0.000534019 | 7839.2  | 18559.6 | 2.36754  |
| 2.36091 | 1.76041E-07 | 4672.05 | 18277.9 | 3.91217  | 0.000102693 | 5005.05 | 12755.3 | 2.54848  |
|         | 2.57742E-06 | 13148.7 | 39479.5 | 3.00255  | 3.26607E-06 | 10383.8 | 31429.6 | 3.02678  |
|         | 3.33971E-06 | 9218.2  | 22641.4 | 2.45617  |             |         |         |          |
|         | 0.00875401  | 1022.6  | 480.125 | -2.12986 | 0.00266814  | 2125.03 | 868.725 | -2.44614 |
|         | 2.16732E-07 | 17231.8 | 41505.6 | 2.40866  | 9.78959E-10 | 11574.7 | 36364.7 | 3.14176  |
|         |             |         |         |          | 5.44494E-06 | 1291.85 | 294.9   | -4.38064 |
|         |             |         |         |          | 0.00105581  | 976.6   | #DIV/0! | #DIV/0!  |
|         |             |         |         |          | 0.00211831  | 1428.4  | 232.2   | -6.15159 |
|         |             |         |         |          | 0.00131688  | 3589.3  | 693.633 | -5.17464 |
|         |             |         |         |          | 0.00215175  | 1045.55 | 294.2   | -3.55387 |
|         | 6.26999E-06 | 1498.58 | 638.075 | -2.34859 |             |         |         |          |
|         |             |         |         |          | 1.56187E-10 | 46071.1 | 142140  | 3.08522  |
|         | 4.28932E-06 | 18958.1 | 9199.98 | -2.06067 |             |         |         |          |
|         | 0.00114195  | 860.475 | 387.375 | -2.2213  | 8.77543E-06 | 2077.98 | 678.425 | -3.06294 |
|         | 0.00305184  | 752.125 | 268.225 | -2.80408 | 0.000256065 | 1385.05 | 383.033 | -3.616   |
|         | 6.65736E-05 | 2342.35 | 1166.78 | -2.00754 |             |         |         |          |
| 4.6324  | 2.66168E-06 | 622.75  | 2342.65 | 3.76178  | 3.70664E-06 | 744.6   | 3373.65 | 4.53082  |
|         | 0.000283306 | 3817.33 | 7851.53 | 2.05681  | 2.10931E-08 | 3730.88 | 14033.1 | 3.76134  |
|         |             |         |         |          | 0.000145811 | 2359.2  | 4922.78 | 2.08663  |
|         |             |         |         |          | 0.0111455   | 959.467 | 316     | -3.03629 |
|         | 2.88793E-06 | 2501.7  | 1002.85 | -2.49459 |             |         |         |          |
|         | 1.61153E-07 | 129137  | 45109.3 | -2.86276 |             |         |         |          |
|         |             |         |         |          | 0.00341436  | #DIV/0! | 959.95  | #DIV/0!  |

|         |             |         |         |          |             |         |         |          |
|---------|-------------|---------|---------|----------|-------------|---------|---------|----------|
|         | 0.00035018  | 2741.25 | 6411.03 | 2.33872  | 0.00028109  | 2115.95 | 4657.05 | 2.20093  |
|         |             |         |         |          | 0.0093831   | 1747.38 | 599.4   | -2.91521 |
|         |             |         |         |          | 1.02218E-07 | 2378.15 | 5035.33 | 2.11733  |
|         |             |         |         |          | 4.38694E-13 | 5806.65 | 20352.8 | 3.50508  |
|         |             |         |         |          | 4.90668E-08 | 1330.3  | 2994.88 | 2.25128  |
|         |             |         |         |          | 1.78046E-06 | 2063.15 | 4729.45 | 2.29234  |
|         | 3.84068E-05 | 1180.5  | 503.65  | -2.34389 | 2.42275E-08 | 3431.78 | 978.425 | -3.50745 |
|         |             |         |         |          | 0.000775603 | 3630.68 | 1561.53 | -2.32508 |
| 4.8526  | 0.0122557   | 961.775 | 2017.63 | 2.09781  |             |         |         |          |
|         |             |         |         |          | 0.00279111  | 1037.45 | 275.9   | -3.76024 |
| 2.55649 | 1.06882E-08 | 5016.65 | 30323.3 | 6.04453  | 1.07877E-15 | 2583.05 | 55955.5 | 21.6626  |
| -2.0785 |             |         |         |          |             |         |         |          |
|         |             |         |         |          | 2.58958E-09 | #DIV/0! | 4386.15 | #DIV/0!  |
|         |             |         |         |          | 0.000933116 | 1020.35 | 373.533 | -2.73162 |
|         |             |         |         |          | 6.62863E-14 | 3510.35 | 12673.2 | 3.61022  |
| -2.2774 |             |         |         |          |             |         |         |          |
|         | 1.85418E-07 | 5546.83 | 2523.6  | -2.19798 | 4.26633E-08 | 6885.93 | 2850.93 | -2.41533 |
| -3.4943 | 5.26834E-05 | 3413.03 | 1196.13 | -2.8534  |             |         |         |          |
|         | 0.000147512 | 1801.58 | 860.267 | -2.09421 |             |         |         |          |
|         |             |         |         |          | 0.0128996   | #DIV/0! | 3967.23 | #DIV/0!  |
| -2.0565 | 2.63744E-06 | 1954.9  | 723.85  | -2.7007  | 5.5427E-09  | 3502.63 | 947.55  | -3.69651 |
|         | 0.000313957 | 574.025 | 265.333 | -2.16341 |             |         |         |          |
| 2.08531 | 1.16712E-07 | 5490.43 | 14415   | 2.62548  | 1.96458E-09 | 5062.65 | 15685.5 | 3.09827  |
| -2.9809 | 3.99412E-05 | 3500.35 | 1244.63 | -2.81235 | 0.00208436  | 3565.55 | 1669.35 | -2.13589 |
|         |             |         |         |          | 5.79934E-05 | 1719.93 | 446.267 | -3.85405 |
|         |             |         |         |          | 0.0017205   | 1953    | #DIV/0! | #DIV/0!  |
| -2.1886 |             |         |         |          |             |         |         |          |
|         | 2.33044E-07 | 7052.1  | 3227.28 | -2.18516 | 6.17206E-06 | 11196.7 | 5558.98 | -2.01416 |
| 2.08249 | 8.4191E-09  | 3504.73 | 12610.5 | 3.59815  | 1.31812E-06 | 2987.43 | 7837.43 | 2.62347  |
|         |             |         |         |          | 0.00728373  | 1314.03 | #DIV/0! | #DIV/0!  |
|         | 0.00017015  | 5732.98 | 12011   | 2.09508  | 8.78332E-07 | 2664.25 | 8981.25 | 3.37102  |
|         |             |         |         |          | 1.27002E-06 | 1806.9  | 710.8   | -2.54207 |
|         | 1.02931E-05 | 3040.38 | 6485.18 | 2.13302  |             |         |         |          |
|         |             |         |         |          | 0.00640595  | 4903.23 | 2421.25 | -2.02508 |
|         |             |         |         |          | 7.06705E-12 | 8167.9  | 24144.6 | 2.95604  |
|         | 2.8917E-06  | 8448.3  | 17603.1 | 2.08362  | 1.51765E-12 | 3263.98 | 12189.7 | 3.73462  |
|         |             |         |         |          | 2.98446E-06 | 1302.43 | 498.8   | -2.61112 |
|         | 0.000990159 | 679.9   | 203.1   | -3.34761 | 8.8052E-07  | 1505    | 356.2   | -4.22515 |
|         |             |         |         |          | 0.0011466   | 1428.67 | 352     | -4.05871 |
|         | 0.00208571  | 1578.18 | 375.9   | -4.19839 | 0.000288734 | 1111.68 | 297.433 | -3.73756 |
|         | 0.00145227  | 683.2   | 256.167 | -2.66701 | 0.0111114   | 2710.78 | 955.125 | -2.83814 |
|         | 0.00147031  | 505.675 | 180.5   | -2.80152 |             |         |         |          |
|         | 2.23946E-05 | 1664.75 | 540.733 | -3.07869 | 2.25066E-11 | 9872.05 | 28569.5 | 2.89398  |
|         |             |         |         |          | 2.05636E-10 | 5912.3  | 1103.25 | -5.35898 |
|         |             |         |         |          | 0.00169314  | 2479.1  | 749     | -3.30988 |
|         | 9.03038E-07 | 3067.03 | 9541.03 | 3.11084  | 1.50098E-09 | 2112.37 | 6796.3  | 3.21739  |
|         |             |         |         |          | 0.000682137 | 1152.03 | 516.867 | -2.22886 |
|         |             |         |         |          | 0.000763844 | 2490.13 | 631.2   | -3.94506 |
|         |             |         |         |          | 0.00100835  | 1363.47 | 557     | -2.44788 |
|         |             |         |         |          | 0.00406385  | 3060.07 | 1003.2  | -3.05031 |
|         |             |         |         |          | 0.00277631  | 1741.03 | 703.325 | -2.47543 |
|         |             |         |         |          | 2.74838E-10 | 4020.9  | 8326.88 | 2.0709   |
|         |             |         |         |          | 3.53219E-05 | #DIV/0! | 1044.8  | #DIV/0!  |
|         |             |         |         |          |             |         |         |          |
|         |             |         |         |          | 0.00595346  | 4090.43 | 1851.83 | -2.20886 |
| -2.5369 | 2.87576E-08 | 3531.83 | 1098.83 | -3.21418 | 8.18959E-06 | 2490.48 | 1067.73 | -2.33251 |
|         |             |         |         |          |             |         |         |          |
|         | 1.77554E-05 | 1542.23 | 653.2   | -2.36103 |             |         |         |          |
|         | 4.46721E-11 | 20175   | 45179.9 | 2.2394   | 9.05041E-07 | #DIV/0! | 2769.25 | #DIV/0!  |
|         |             |         |         |          | 2.52698E-18 | 10339.4 | 41527.6 | 4.01646  |

|         |             |         |         |          |             |         |         |          |
|---------|-------------|---------|---------|----------|-------------|---------|---------|----------|
|         | 6.53584E-05 | 1543.53 | 4453.8  | 2.88547  | 9.25088E-09 | 616.8   | 3224.1  | 5.22714  |
|         |             |         |         |          | 1.06441E-10 | 1691.4  | 9108.7  | 5.3853   |
|         | 0.00681583  | 665.9   | #DIV/0! | #DIV/0!  | 0.00587388  | 1698.1  | 475.7   | -3.56969 |
|         | 0.00359654  | 1071.8  | #DIV/0! | #DIV/0!  | 0.00242281  | 2890.68 | #DIV/0! | #DIV/0!  |
|         |             |         |         |          | 0.0126524   | 1612.1  | 443.375 | -3.63597 |
|         |             |         |         |          | 0.003588    | 2017.27 | #DIV/0! | #DIV/0!  |
| 2.36592 | 3.48206E-12 | 12674.8 | 49668.5 | 3.91869  | 5.47581E-18 | 6631.45 | 51961.8 | 7.83566  |
| 3.09571 | 3.33439E-12 | 4400.65 | 19870.6 | 4.51538  | 3.94744E-08 | 4873.45 | 12258.8 | 2.51543  |
|         | 4.3824E-08  | 4998.65 | 16428.7 | 3.28663  | 1.02258E-10 | 2571    | 13045.7 | 5.07418  |
| 2.71953 | 3.17081E-06 | 1131.6  | 3147.3  | 2.78128  |             |         |         |          |
| 2.52419 | 8.70932E-08 | 21231.9 | 75569   | 3.55922  | 1.93026E-09 | 20440.2 | 88753.7 | 4.34211  |
|         |             |         |         |          | 0.00336157  | #DIV/0! | 1967.7  | #DIV/0!  |
| 2.94586 | 4.96078E-14 | 2493.15 | 13956.7 | 5.59802  | 1.63997E-09 | 3649.5  | 8293.4  | 2.27248  |
|         | 5.80115E-08 | 4340.55 | 16426.8 | 3.7845   | 3.75766E-06 | 5203.53 | 16075.3 | 3.0893   |
| 2.97801 | 1.28884E-13 | 6834.38 | 34781.7 | 5.08923  | 2.68497E-13 | 5214.63 | 25090.5 | 4.81156  |
|         |             |         |         |          | 0.000282616 | 847.6   | #DIV/0! | #DIV/0!  |
|         |             |         |         |          | 2.1974E-09  | #DIV/0! | 1563.43 | #DIV/0!  |
|         | 0.00653411  | 797.625 | 398.567 | -2.00123 |             |         |         |          |
|         | 1.31817E-08 | 924.8   | 383.925 | -2.4088  |             |         |         |          |
|         | 9.43898E-05 | 1664.3  | 702.7   | -2.36844 | 2.72765E-07 | 1877.48 | 612.5   | -3.06527 |
|         |             |         |         |          | 1.00589E-07 | 1381.53 | 4716.78 | 3.41418  |
|         |             |         |         |          | 0.0213865   | #DIV/0! | 1949.03 | #DIV/0!  |
| 16.1679 | 2.30805E-06 | 2958.73 | 52539.8 | 17.7576  | 6.36082E-07 | 2946.83 | 43050.8 | 14.6092  |
|         |             |         |         |          | 1.94276E-14 | 1306.95 | 4659.93 | 3.5655   |
|         | 1.15005E-08 | 1926.9  | 3941.98 | 2.04576  | 1.21483E-11 | #DIV/0! | 3377.5  | #DIV/0!  |
|         |             |         |         |          | 1.35248E-05 | #DIV/0! | 1535.85 | #DIV/0!  |
|         |             |         |         |          | 1.51093E-06 | 1958.78 | 961.275 | -2.03768 |
|         | 8.71479E-06 | 1037.93 | 353.825 | -2.93344 | 2.60811E-06 | 1946.85 | 641.025 | -3.03709 |
|         |             |         |         |          | 1.30722E-08 | 1477.37 | 3151.03 | 2.13287  |
|         |             |         |         |          | 2.65292E-09 | 2201.73 | 4759.15 | 2.16156  |
|         |             |         |         |          | 1.23083E-06 | 947.5   | 2187.63 | 2.30884  |
| 5.78486 |             |         |         |          | 1.34581E-13 | 1555.9  | 11840.2 | 7.60984  |
| 4.41814 | 5.58726E-17 | 5157.08 | 39083.6 | 7.57863  | 1.17506E-18 | 4633.95 | 38741.6 | 8.36039  |
|         |             |         |         |          | 5.61047E-06 | 6377.13 | 1188.18 | -5.36716 |
|         |             |         |         |          | 0.0161227   | 1479.65 | 565.2   | -2.61792 |
|         |             |         |         |          | 0.00174201  | 1547.47 | 564.6   | -2.74082 |
|         |             |         |         |          | 0.00230767  | 1274.7  | 532.3   | -2.3947  |
|         | 0.000115817 | 872.175 | 362.375 | -2.40683 | 4.92359E-06 | 1431.2  | 439.55  | -3.25606 |
| -5.768  | 8.56769E-06 | 3291.98 | 463.1   | -7.10856 | 0.00497467  | 1516.03 | #DIV/0! | #DIV/0!  |
| #DIV/0! | 3.40068E-05 | 884.633 | #DIV/0! | #DIV/0!  |             |         |         |          |
|         | 3.93224E-06 | 33774.3 | 85097.5 | 2.51959  | 2.85237E-10 | 15985.7 | 65779.3 | 4.11489  |
|         | 0.000406831 | 13402.6 | 5970.7  | -2.24473 |             |         |         |          |
|         |             |         |         |          | 8.56264E-09 | 3249.8  | 8075.68 | 2.48498  |
| -2.2614 |             |         |         |          |             |         |         |          |
|         |             |         |         |          | 1.84139E-07 | 2619.3  | 5848.93 | 2.23301  |
| -2.3395 | 5.80526E-06 | 1075.5  | 418.4   | -2.57051 | 6.69839E-08 | 1668.23 | 474.65  | -3.51464 |
|         | 9.26359E-06 | 519.85  | 192.2   | -2.70473 | 1.50483E-05 | 1357.03 | 398.4   | -3.40619 |
|         |             |         |         |          | 7.79707E-09 | 5388.45 | 11425.1 | 2.12029  |
|         |             |         |         |          | 1.21372E-06 | 6396.8  | 1619.58 | -3.94968 |
|         | 1.95174E-07 | 456.967 | 1907.98 | 4.1753   | 1.66079E-05 | #DIV/0! | 1473.93 | #DIV/0!  |
|         |             |         |         |          | 0.000120779 | #DIV/0! | 1844.73 | #DIV/0!  |
|         |             |         |         |          | 0.00284995  | 858.425 | 321.65  | -2.66882 |
|         |             |         |         |          | 0.00643148  | 1262.08 | 527.15  | -2.39415 |
|         | 0.00382962  | 3821.63 | 927.1   | -4.12213 |             |         |         |          |
|         |             |         |         |          | 0.0135128   | 2228.38 | 519.825 | -4.28678 |
|         |             |         |         |          | 4.66807E-07 | 943.733 | 382.167 | -2.46943 |
| -2.0811 | 3.14976E-08 | 1480.25 | #DIV/0! | #DIV/0!  | 8.28351E-07 | 1837.63 | #DIV/0! | #DIV/0!  |
|         | 0.000280347 | 600.05  | 278.3   | -2.15613 |             |         |         |          |
|         | 4.73502E-06 | 26712.3 | 11526   | -2.31757 | 3.78197E-05 | 48499.3 | 23174.4 | -2.0928  |
|         |             |         |         |          | 0.000274797 | #DIV/0! | 3319.15 | #DIV/0!  |
|         |             |         |         |          | 0.000932676 | 2352.07 | #DIV/0! | #DIV/0!  |
|         | 0.000271237 | 8481.6  | 2963.28 | -2.86224 | 0.000303791 | 7118.05 | 2443.2  | -2.91341 |
|         | 0.00287869  | 5627.35 | 2801.53 | -2.00867 |             |         |         |          |

|         |             |         |         |          |             |         |         |          |  |
|---------|-------------|---------|---------|----------|-------------|---------|---------|----------|--|
| -2.0613 |             |         |         |          |             |         |         |          |  |
| -2.0511 |             |         |         |          |             |         |         |          |  |
|         | 1.49989E-08 | 3772.07 | 1618.75 | -2.33023 |             |         |         |          |  |
| -2.5529 |             |         |         |          |             |         |         |          |  |
|         |             |         |         |          | 0.000364065 | #DIV/0! | 1364.75 | #DIV/0!  |  |
|         | 0.00509232  | 374.7   | 1147.48 | 3.06238  |             |         |         |          |  |
| #DIV/0! |             |         |         |          |             |         |         |          |  |
|         |             |         |         |          | 0.00159908  | 1351.03 | 666.7   | -2.02644 |  |
|         | 0.00176339  | 800.8   | #DIV/0! | #DIV/0!  |             |         |         |          |  |
|         | 3.3458E-07  | 1485.98 | 591.925 | -2.51041 |             |         |         |          |  |
| -2.1746 | 0.00311032  | 1001.68 | 378.1   | -2.64923 |             |         |         |          |  |
|         | 4.63494E-08 | 777.925 | 168     | -4.63051 | 3.35089E-06 | 1270.2  | 391.975 | -3.24051 |  |
|         | 0.00112607  | 623.067 | 199.5   | -3.12314 | 0.00044144  | 1296.98 | 402.433 | -3.22283 |  |
|         | 1.74455E-07 | 1077.4  | #DIV/0! | #DIV/0!  | 3.35103E-06 | 1806.4  | 685.7   | -2.63439 |  |
|         | 0.000502916 | 915.55  | 277.6   | -3.29809 | 0.00893353  | 1144.88 | 541     | -2.11622 |  |
|         | 0.000047416 | 1541.8  | 524.125 | -2.94166 | 1.75396E-06 | 3772.9  | 865.35  | -4.35997 |  |
|         | 0.00057091  | 945.567 | 329.45  | -2.87014 | 0.000020079 | 2734.83 | 817.167 | -3.34673 |  |
|         | 0.00354576  | 725.533 | 335.4   | -2.16319 | 0.000751489 | 1421.33 | 586     | -2.42548 |  |
|         |             |         |         |          | 1.76693E-06 | 1070.53 | #DIV/0! | #DIV/0!  |  |
| 9.25406 | 1.4178E-11  | 1906.57 | 28843.7 | 15.1286  | 6.88236E-11 | 2682.3  | 24146   | 9.00197  |  |
|         | 9.70573E-08 | 1965.08 | 652.3   | -3.01253 |             |         |         |          |  |
|         |             |         |         |          | 0.00147963  | 2668.35 | 702.033 | -3.80089 |  |
|         | 2.28025E-06 | 1463.9  | 651.7   | -2.24628 | 4.32506E-06 | 1898.1  | 914.075 | -2.07653 |  |
|         | 0.000156108 | 777     | 284.8   | -2.72823 |             |         |         |          |  |
|         | 6.07766E-05 | 936.8   | 418.65  | -2.23767 | 7.40671E-06 | 2109.18 | 829.925 | -2.5414  |  |
|         | 0.000239743 | 747.167 | #DIV/0! | #DIV/0!  |             |         |         |          |  |
|         |             |         |         |          | 0.00901624  | #DIV/0! | 2012.45 | #DIV/0!  |  |
|         |             |         |         |          | 3.20204E-11 | 13305.9 | 38702.2 | 2.90865  |  |
|         | 4.98196E-06 | 1675.73 | 717.733 | -2.33475 | 6.72502E-06 | 2606.05 | 1140.43 | -2.28516 |  |
|         | 4.68733E-06 | 2578.9  | 6500.25 | 2.52055  |             |         |         |          |  |
|         | 5.01257E-09 | 2104.8  | 5780.58 | 2.74638  |             |         |         |          |  |
|         |             |         |         |          | 0.0137287   | 1029.07 | 344.9   | -2.98367 |  |
|         | 0.0142704   | 628.85  | 289.675 | -2.17088 |             |         |         |          |  |
|         |             |         |         |          | 6.30587E-06 | 8167.23 | 3852.55 | -2.11995 |  |
|         |             |         |         |          | 3.07759E-08 | 4452.78 | 9612.75 | 2.15882  |  |
|         |             |         |         |          | 0.00394877  | #DIV/0! | 2136.5  | #DIV/0!  |  |
| 2.0155  | 3.29068E-09 | 3374.7  | 12179   | 3.60891  | 3.23049E-06 | #DIV/0! | 6656.68 | #DIV/0!  |  |
|         |             |         |         |          | 9.89712E-07 | 1699.43 | 664.5   | -2.55746 |  |
| -4.8077 | 2.09637E-09 | 3515.45 | 618.25  | -5.68613 | 5.12782E-08 | 2336.6  | 499.4   | -4.67881 |  |
| -3.7187 | 1.27562E-08 | 2295.18 | 579.3   | -3.96198 |             |         |         |          |  |
|         |             |         |         |          | 0.00223806  | 1988.33 | 514.4   | -3.86533 |  |
|         |             |         |         |          | 0.00199124  | #DIV/0! | 1926.87 | #DIV/0!  |  |
|         |             |         |         |          | 3.15968E-06 | 2818.35 | 1187.88 | -2.3726  |  |
| 2.43242 |             |         |         |          |             |         |         |          |  |
|         | 0.00703873  | 532.625 | 226.2   | -2.35466 |             |         |         |          |  |
|         |             |         |         |          | 4.85336E-05 | 2381.88 | 676.633 | -3.52019 |  |
|         | 0.00408145  | 1945.18 | 3908.13 | 2.00914  |             |         |         |          |  |
|         | 0.00136606  | 971.275 | 2518.23 | 2.5927   |             |         |         |          |  |
|         |             |         |         |          | 0.000345618 | 2231.53 | 5082.55 | 2.27761  |  |
|         | 2.80387E-06 | 18659.6 | 39523.3 | 2.11812  | 1.62056E-12 | 9974.28 | 40935.8 | 4.10414  |  |
|         | 8.39354E-08 | 1760.08 | 707.45  | -2.48791 |             |         |         |          |  |
| #DIV/0! |             |         |         |          |             |         |         |          |  |
|         |             |         |         |          | 0.00132127  | 757.9   | 1615.78 | 2.13191  |  |
|         |             |         |         |          | 4.23444E-11 | 3076.68 | 10139.1 | 3.29548  |  |
|         |             |         |         |          | 6.37907E-16 | 2902.73 | 13233   | 4.55883  |  |
|         | 1.92771E-05 | #DIV/0! | 1225.3  | #DIV/0!  | 3.96369E-05 | #DIV/0! | 1681.6  | #DIV/0!  |  |
|         |             |         |         |          | 7.69676E-14 | 8827.05 | 24176.5 | 2.73891  |  |
|         |             |         |         |          | 1.63432E-10 | 4497.1  | 13525.6 | 3.00763  |  |
|         |             |         |         |          | 1.20483E-20 | 6264.6  | 25948.3 | 4.14205  |  |
|         |             |         |         |          | 2.65062E-06 | 4119    | 1660.85 | -2.48006 |  |
|         |             |         |         |          | 0.000118665 | 11803.1 | 5005.93 | -2.35783 |  |
|         |             |         |         |          | 2.31065E-14 | 15425.1 | 43110.6 | 2.79484  |  |
|         | 0.000953908 | #DIV/0! | 3691.97 | #DIV/0!  | 0.00264983  | #DIV/0! | 5397.15 | #DIV/0!  |  |

|         |             |         |         |          |             |         |         |          |
|---------|-------------|---------|---------|----------|-------------|---------|---------|----------|
|         |             |         |         |          | 9.97368E-05 | #DIV/0! | 2325.57 | #DIV/0!  |
| 2.22771 | 0.000195379 | 1784.08 | 5500    | 3.08283  |             |         |         |          |
|         |             |         |         |          | 1.67191E-08 | 1627.83 | 3982.5  | 2.4465   |
|         |             |         |         |          | 0.000151455 | 987.275 | 353.675 | -2.79148 |
|         |             |         |         |          | 0.000425792 | 1233.17 | #DIV/0! | #DIV/0!  |
|         |             |         |         |          | 8.33209E-10 | 4644.9  | 11762.2 | 2.53227  |
|         |             |         |         |          | 6.70568E-07 | 11257.7 | 28601.3 | 2.54059  |
|         |             |         |         |          | 8.94967E-10 | 17519   | 53219.8 | 3.03784  |
|         |             |         |         |          | 1.1622E-10  | 12383.2 | 40154.5 | 3.24267  |
| #DIV/0! | 6.86472E-05 | #DIV/0! | 1801.98 | #DIV/0!  | 0.0180467   | #DIV/0! | 1436.43 | #DIV/0!  |
| 8.47587 | 3.50531E-05 | 710.5   | 5688.08 | 8.00574  | 0.00755496  | #DIV/0! | 3420.93 | #DIV/0!  |
| 4.73572 | 1.20076E-11 | #DIV/0! | 7020.85 | #DIV/0!  | 3.66311E-08 | #DIV/0! | 5225.3  | #DIV/0!  |
| 2.51378 |             |         |         |          |             |         |         |          |
|         |             |         |         |          | 1.76042E-05 | 1834.08 | 406.675 | -4.50993 |
|         |             |         |         |          | 0.00727148  | #DIV/0! | 1225.83 | #DIV/0!  |
|         |             |         |         |          | 2.3536E-12  | 5925.13 | 16083   | 2.71438  |
|         |             |         |         |          | 1.40643E-10 | 5781.33 | 16124.7 | 2.78911  |
|         | 8.11139E-05 | 1886.08 | 3973.75 | 2.10689  | 8.52811E-11 | 1273.3  | 3432.43 | 2.69569  |
|         |             |         |         |          | 3.73155E-05 | 3496.28 | 1312.9  | -2.66302 |
|         |             |         |         |          | 1.35057E-07 | 5079.63 | 1925.83 | -2.63764 |
|         |             |         |         |          | 0.0166879   | 1224.85 | 450.25  | -2.72038 |
|         |             |         |         |          | 0.022567    | 849.175 | 424.25  | -2.00159 |
| #DIV/0! | 0.000655098 | 578.525 | #DIV/0! | #DIV/0!  |             |         |         |          |
| #DIV/0! | 1.17757E-05 | 1046.13 | #DIV/0! | #DIV/0!  |             |         |         |          |
|         |             |         |         |          | 0.000684407 | #DIV/0! | 1956.2  | #DIV/0!  |
|         | 0.00196539  | 3992.8  | 1926.45 | -2.07262 |             |         |         |          |
|         |             |         |         |          | 3.17679E-08 | 1468.75 | 4291.7  | 2.92201  |
|         |             |         |         |          | 4.44315E-16 | 5697.88 | 42396   | 7.44067  |
|         |             |         |         |          | 1.28452E-13 | 2230.25 | 20886.8 | 9.36523  |
| 2.11555 | 3.6698E-10  | 2328.95 | 6195.75 | 2.66032  | 4.32305E-11 | 2504.95 | 6857.5  | 2.73758  |
|         |             |         |         |          | 0.00138483  | 1323.73 | 600.367 | -2.20487 |
|         | 8.70566E-05 | 816.1   | 295.367 | -2.76301 | 6.90557E-05 | 1586.45 | 556.325 | -2.85166 |
| -2.1878 | 1.82424E-06 | 2044.9  | 899.35  | -2.27375 | 2.01876E-07 | 2431.58 | 971.2   | -2.50368 |
|         |             |         |         |          | 0.00134062  | 1794.45 | 511.633 | -3.5073  |
|         |             |         |         |          | 2.02518E-06 | 3927.08 | 1334.88 | -2.9419  |
|         | 4.47949E-11 | 2333.33 | 655.933 | -3.55726 | 1.80148E-09 | 1838.77 | 637.1   | -2.88615 |
|         |             |         |         |          | 0.00270011  | 1248.88 | 555.45  | -2.2484  |
|         | 9.44211E-05 | 667.85  | 269.1   | -2.48179 | 2.57284E-06 | 1825.23 | 554.3   | -3.29286 |
|         |             |         |         |          | 0.00364175  | 1249.73 | 476.6   | -2.62217 |
|         |             |         |         |          | 2.77343E-05 | 1489.03 | 585.65  | -2.54252 |
|         | 3.42949E-07 | 1435.5  | 584.55  | -2.45574 |             |         |         |          |
|         |             |         |         |          | 4.12675E-08 | 1298.53 | 2707.98 | 2.08541  |
|         |             |         |         |          | 0.000523643 | 5306.85 | 2209    | -2.40238 |
|         |             |         |         |          | 1.47524E-06 | 3740.2  | 1575.58 | -2.37386 |
|         |             |         |         |          | 0.000274053 | 4130.58 | 1885.3  | -2.19094 |
|         |             |         |         |          | 0.000326059 | 2152.6  | 1029.4  | -2.09112 |
| 2.36103 |             |         |         |          |             |         |         |          |
|         |             |         |         |          | 0.0217556   | #DIV/0! | 1805.5  | #DIV/0!  |
|         |             |         |         |          | 0.000138308 | 2241.3  | 762.567 | -2.93915 |
|         |             |         |         |          | 0.000659346 | 838.75  | 415.3   | -2.01962 |
|         |             |         |         |          | 0.000657284 | 2293.17 | 972.9   | -2.35704 |
|         |             |         |         |          | 0.0114061   | 928.85  | #DIV/0! | #DIV/0!  |
|         | 9.04842E-05 | 2442.95 | 1020.8  | -2.39317 |             |         |         |          |
|         |             |         |         |          | 0.000393348 | 1007.4  | 373.325 | -2.69845 |
| -2.1713 | 4.34357E-06 | 2986.1  | 1157.88 | -2.57895 |             |         |         |          |
| -2.2185 | 4.13346E-07 | 829.65  | 376.5   | -2.20359 |             |         |         |          |
|         | 0.00135184  | #DIV/0! | 1784.28 | #DIV/0!  | 1.24378E-07 | #DIV/0! | 2012.5  | #DIV/0!  |
|         | 6.20447E-05 | 1754.63 | 753.05  | -2.33002 |             |         |         |          |
| -3.1589 | 4.96415E-13 | 1479.43 | #DIV/0! | #DIV/0!  | 3.01202E-08 | 1244.93 | 434.467 | -2.86541 |
| -2.2312 | 4.9051E-07  | 3495.7  | 1074.4  | -3.25363 |             |         |         |          |
|         |             |         |         |          | 0.00521958  | 1720.03 | #DIV/0! | #DIV/0!  |
| 13.4991 | 2.92279E-09 | 905.25  | 14388.7 | 15.8947  | 1.28889E-12 | 1613.5  | 15052.6 | 9.32913  |
|         |             |         |         |          | 0.00319117  | #DIV/0! | 939.825 | #DIV/0!  |

|         |             |         |         |          |             |         |         |          |
|---------|-------------|---------|---------|----------|-------------|---------|---------|----------|
|         |             |         |         |          | 3.54426E-09 | 4950.53 | 12088.3 | 2.44182  |
|         |             |         |         |          | 1.44869E-10 | 2230.38 | 7457.13 | 3.34344  |
|         |             |         |         |          | 1.78583E-07 | 20199.1 | 9934.1  | -2.03331 |
|         | 3.42297E-05 | 2315.25 | 1137.5  | -2.03538 | 4.95356E-05 | 3163.15 | 1533.38 | -2.06287 |
| -3.0795 |             |         |         |          |             |         |         |          |
|         |             |         |         |          | 2.8927E-06  | 1352.85 | #DIV/0! | #DIV/0!  |
|         | 2.87715E-05 | 1246.05 | #DIV/0! | #DIV/0!  | 8.5212E-08  | 2568.88 | 807.9   | -3.17969 |
| -2.5214 |             |         |         |          |             |         |         |          |
|         | 0.00266083  | 654.133 | 196.4   | -3.33062 | 0.0215014   | 1134.38 | 520.433 | -2.17967 |
|         | 1.21364E-08 | 1737.08 | 578     | -3.00532 | 2.19449E-08 | 2637.25 | 923.375 | -2.8561  |
|         | 0.00316207  | 788.95  | 257.3   | -3.06627 |             |         |         |          |
|         |             |         |         |          | 2.02114E-06 | 5432.78 | 2445.15 | -2.22186 |
|         | 0.000173634 | #DIV/0! | 3733.83 | #DIV/0!  | 1.50951E-06 | #DIV/0! | 3025.9  | #DIV/0!  |
|         |             |         |         |          | 0.00428226  | 1723.05 | 333.65  | -5.16424 |
|         |             |         |         |          | 0.00640215  | 1387.1  | 456.1   | -3.04122 |
|         |             |         |         |          | 0.0188924   | #DIV/0! | 699     | #DIV/0!  |
| #DIV/0! | 0.00188896  | 948.3   | 259     | -3.66139 |             |         |         |          |
|         |             |         |         |          | 1.05874E-08 | 2522.87 | 6228.93 | 2.46899  |
|         | 7.96246E-06 | 6341.38 | 14016.3 | 2.21029  | 1.35455E-12 | 2067.43 | 9440.8  | 4.56645  |
|         | 2.16439E-08 | 3266.8  | 9242.93 | 2.82935  |             |         |         |          |
|         | 3.63152E-06 | 3882.8  | 8709.68 | 2.24314  | 1.53237E-07 | 1780.48 | 4454.4  | 2.5018   |
| 5.05208 | 6.09356E-18 | 3396.75 | 21336.1 | 6.28134  | 9.00095E-14 | 4217.08 | 14855.3 | 3.52264  |
| 3.28488 | 1.75359E-12 | 1828.53 | 10057   | 5.50005  | 1.70071E-13 | 1251.78 | 6416.55 | 5.12596  |
| 2.61662 | 4.12766E-11 | 1589.63 | 10010.9 | 6.29766  | 2.52242E-14 | 918.067 | 7284.18 | 7.93425  |
| 4.22159 | 6.30965E-06 | 2378.85 | 6115.03 | 2.57058  | 1.33889E-07 | #DIV/0! | 5860.63 | #DIV/0!  |
|         | 0.0106448   | #DIV/0! | 764.433 | #DIV/0!  |             |         |         |          |
|         |             |         |         |          | 2.29059E-06 | 2569.48 | 1100.5  | -2.33483 |
| 2.67055 | 9.17977E-18 | 4112.18 | 20875.1 | 5.0764   | 9.71857E-18 | 4198.83 | 20088.6 | 4.78434  |
| 4.2626  | 0.0130758   | #DIV/0! | 1270.65 | #DIV/0!  |             |         |         |          |
|         |             |         |         |          | 2.62787E-10 | 222074  | 97686.9 | -2.27333 |
|         |             |         |         |          | 1.68006E-10 | 186325  | 85435.8 | -2.18087 |
|         | 0.0123355   | 3947.5  | 917.5   | -4.30245 | 0.000282916 | 4093.65 | #DIV/0! | #DIV/0!  |
|         | 0.0093789   | 1949.38 | 511.55  | -3.81072 | 9.57665E-06 | 2550.23 | #DIV/0! | #DIV/0!  |
|         | 0.00075003  | 1916.18 | 445.8   | -4.29828 | 6.81534E-06 | 2744.13 | 434.7   | -6.31269 |
|         | 0.00215597  | 1426.2  | 386.633 | -3.68877 | 3.07047E-05 | 2259.35 | 778.95  | -2.90051 |
|         | 0.0131882   | 5048.98 | 1668.25 | -3.02651 | 2.10982E-05 | 4696.33 | 708.167 | -6.63167 |
|         | 2.12961E-07 | 9408.58 | 2590.45 | -3.63202 | 6.54457E-08 | 4641.38 | 1159.6  | -4.00257 |
|         | 3.07082E-06 | 6058.38 | 1480.2  | -4.09294 | 1.45781E-06 | 3291.78 | 858.45  | -3.83456 |
| #DIV/0! | 0.00377204  | 975.733 | 404.4   | -2.41279 |             |         |         |          |
| -2.0547 |             |         |         |          |             |         |         |          |
|         | 6.9462E-06  | 22695.3 | 9373.45 | -2.42123 | 9.77544E-05 | 36554.3 | 18005.7 | -2.03015 |
|         |             |         |         |          | 0.00666989  | 1157.85 | 429.7   | -2.69455 |
|         |             |         |         |          | 0.0157925   | 1599.2  | 298.4   | -5.35925 |
| 2.22807 |             |         |         |          |             |         |         |          |
|         | 0.000181303 | 2160.13 | 958.65  | -2.2533  |             |         |         |          |
|         |             |         |         |          | 0.00357075  | 891.925 | 247.9   | -3.59792 |
| -2.1501 | 7.27639E-07 | 1623.78 | 774.15  | -2.09749 |             |         |         |          |
|         | 4.70633E-05 | 948.825 | 472.425 | -2.00841 |             |         |         |          |
| -2.0526 |             |         |         |          |             |         |         |          |
|         |             |         |         |          | 0.0231004   | #DIV/0! | 2789.28 | #DIV/0!  |
|         |             |         |         |          | 3.04443E-06 | 5340.33 | 12427.2 | 2.32704  |
|         | 8.11097E-10 | 917.533 | #DIV/0! | #DIV/0!  |             |         |         |          |
|         |             |         |         |          | 1.69649E-05 | 2180.63 | 880.225 | -2.47736 |
|         | 0.00238448  | 1297.68 | 519.6   | -2.49745 | 0.000611749 | 1383.43 | 585.625 | -2.36231 |
|         | 7.59058E-06 | 12249.5 | 5527.55 | -2.21608 |             |         |         |          |
| -2.1571 |             |         |         |          |             |         |         |          |
|         |             |         |         |          | 0.00850987  | 2271.53 | 1135.3  | -2.00081 |
|         |             |         |         |          | 0.00490715  | 793.033 | 170.367 | -4.65486 |
|         |             |         |         |          | 0.00220458  | 1941    | 507.2   | -3.82689 |
|         |             |         |         |          | 0.00130413  | 1411.88 | 353.367 | -3.9955  |
|         |             |         |         |          | 0.0143473   | 978.667 | #DIV/0! | #DIV/0!  |
|         |             |         |         |          | 1.41448E-09 | 9559.85 | 1928    | -4.95843 |



|         |             |         |         |          |             |         |         |          |
|---------|-------------|---------|---------|----------|-------------|---------|---------|----------|
|         | 0.00118163  | 8566.15 | 3750.45 | -2.28403 | 6.17982E-05 | 14590.8 | 5229.1  | -2.7903  |
| 4.48736 | 0.00282667  | 983.05  | 3526.15 | 3.58695  |             |         |         |          |
|         |             |         |         |          | 3.87108E-08 | 1846.48 | 798.6   | -2.31214 |
|         |             |         |         |          | 1.43164E-08 | 2006.85 | 441.05  | -4.55016 |
|         | 2.39017E-07 | 1672.7  | 758.05  | -2.20658 | 1.11898E-10 | 2793.93 | 882.025 | -3.16763 |
|         | 0.000255844 | 545.3   | #DIV/0! | #DIV/0!  |             |         |         |          |
|         |             |         |         |          | 0.00349282  | 23932.7 | 11023.8 | -2.17101 |
|         | 1.12097E-05 | #DIV/0! | 1225.93 | #DIV/0!  | 1.56925E-06 | #DIV/0! | 2206.53 | #DIV/0!  |
|         | 0.000579329 | 921.05  | 346.2   | -2.66046 | 3.93271E-05 | 1458.5  | 590.4   | -2.47036 |
|         |             |         |         |          | 0.000117099 | 1878.95 | 692.2   | -2.71446 |
|         |             |         |         |          | 0.000582209 | 1132.47 | 387     | -2.92627 |
|         | 0.000142681 | 542     | 225.95  | -2.39876 | 0.000119819 | 1214.33 | 302.225 | -4.01795 |
|         |             |         |         |          | 0.000523349 | 1216.2  | 422.7   | -2.87722 |
|         |             |         |         |          | 0.0106967   | 980.067 | 306.9   | -3.19344 |
|         |             |         |         |          | 1.10663E-05 | 1518.93 | 560.975 | -2.70765 |
| -2.3196 | 3.44998E-06 | 2373.2  | 573.6   | -4.13738 |             |         |         |          |
|         |             |         |         |          | 0.0167664   | 1370.53 | #DIV/0! | #DIV/0!  |
|         |             |         |         |          | 0.000910882 | 811.9   | 251.5   | -3.22823 |
|         |             |         |         |          | 7.34829E-07 | 7689.7  | 2626.6  | -2.92763 |
|         |             |         |         |          | 0.0027774   | 1279.3  | 339.3   | -3.77041 |
|         |             |         |         |          | 4.75592E-06 | 2308.6  | 975.8   | -2.36585 |
|         | 4.18491E-12 | 6125.65 | 20191.5 | 3.29622  | 1.38056E-14 | 3625.4  | 15020.5 | 4.14314  |
|         |             |         |         |          | 6.11126E-08 | #DIV/0! | 1510.77 | #DIV/0!  |
|         |             |         |         |          | 8.81092E-05 | 811.667 | #DIV/0! | #DIV/0!  |
|         |             |         |         |          | 8.83041E-06 | 4070.6  | 671.2   | -6.06466 |
|         | 1.68956E-05 | 1771.5  | 21470.2 | 12.1198  | 6.34729E-05 | 4160.08 | 48237.6 | 11.5954  |
|         | 2.79811E-05 | #DIV/0! | 5596.5  | #DIV/0!  | 4.89307E-05 | 1902.3  | 11465.7 | 6.02727  |
|         |             |         |         |          | 0.000033512 | 3787.75 | 48737.6 | 12.8672  |
| #DIV/0! |             |         |         |          |             |         |         |          |
| #DIV/0! | 1.51944E-05 | #DIV/0! | 1197.65 | #DIV/0!  | 2.14179E-06 | #DIV/0! | 2026.3  | #DIV/0!  |
|         |             |         |         |          | 4.82212E-10 | 3061.38 | 7767.25 | 2.53718  |
|         |             |         |         |          | 3.06083E-11 | #DIV/0! | 4928.2  | #DIV/0!  |
|         |             |         |         |          | 5.69352E-07 | 2258.3  | 642.233 | -3.51632 |
|         |             |         |         |          | 3.22153E-08 | 3343.88 | 7556.95 | 2.25994  |
|         | 0.000232653 | 772.275 | 291.2   | -2.65204 |             |         |         |          |
|         |             |         |         |          | 1.17479E-12 | 3858.48 | 14280.1 | 3.70098  |
|         |             |         |         |          | 0.000925969 | 1739.98 | 708.3   | -2.45655 |
|         |             |         |         |          | 0.000186417 | 1050.8  | 358.35  | -2.93233 |
|         |             |         |         |          | 6.95257E-06 | 3146.98 | 9375.85 | 2.97932  |
| 9.72726 | 2.58086E-06 | 1028.1  | 15082   | 14.6698  | 5.33552E-08 | 3783.7  | 9793.6  | 2.58837  |
| 10.8421 | 8.14622E-07 | #DIV/0! | 6268.8  | #DIV/0!  |             |         |         |          |
|         |             |         |         |          | 6.47722E-13 | 1432.3  | 3331.3  | 2.32584  |
|         |             |         |         |          | 3.26509E-17 | 2048.58 | 5084.73 | 2.48208  |
|         |             |         |         |          | 2.51727E-09 | 4445.5  | 13088.2 | 2.94415  |
|         |             |         |         |          | 0.00405178  | 679.4   | 335.2   | -2.02685 |
|         |             |         |         |          | 1.02374E-09 | 4731.6  | 11828.6 | 2.49992  |
|         |             |         |         |          | 2.29579E-06 | 1939.9  | 4008.73 | 2.06646  |
|         |             |         |         |          | 2.07704E-08 | #DIV/0! | 2949.95 | #DIV/0!  |
|         | 4.21438E-08 | 1652.3  | 434.575 | -3.80211 | 1.3253E-10  | 4171.35 | 733.475 | -5.68711 |
|         |             |         |         |          |             |         |         |          |
|         |             |         |         |          | 6.45206E-05 | 1215.07 | 432.6   | -2.80875 |
| 9.66461 | 7.35509E-11 | 1013.75 | 5268.18 | 5.19672  | 2.03613E-11 | #DIV/0! | 7735.03 | #DIV/0!  |
| 3.20556 | 2.59461E-11 | 4369.3  | 18603.4 | 4.25775  | 7.73678E-13 | 2752.88 | 13397.8 | 4.86685  |
|         | 0.000721275 | 906.233 | #DIV/0! | #DIV/0!  | 0.00983514  | 1699.45 | 469     | -3.62356 |
|         |             |         |         |          | 0.0152316   | #DIV/0! | 3322.15 | #DIV/0!  |
|         | 4.14746E-06 | 521.025 | #DIV/0! | #DIV/0!  | 4.87967E-05 | 879.3   | 373.5   | -2.35422 |
|         | 0.000062545 | 1249.25 | 617.275 | -2.02381 | 9.73837E-08 | 1981.75 | 843.775 | -2.34867 |
|         | 0.000496666 | 781.667 | 317     | -2.46583 |             |         |         |          |
|         |             |         |         |          | 0.00059942  | 1566.8  | 6197.23 | 3.95534  |
| -2.3107 | 2.18622E-07 | 17012.7 | 6660    | -2.55445 |             |         |         |          |
| -2.9095 | 6.82607E-05 | 6930.2  | 2928.18 | -2.36673 |             |         |         |          |
|         | 0.000248624 | 58435.3 | 22731.4 | -2.57069 |             |         |         |          |
|         | 0.00699271  | 9406.13 | 3771.7  | -2.49387 | 0.0109633   | 8633.38 | 3708.78 | -2.32782 |

|         |             |         |         |          |             |         |         |          |
|---------|-------------|---------|---------|----------|-------------|---------|---------|----------|
|         |             |         |         |          | 0.00551634  | 2809.3  | 1222.38 | -2.29823 |
| 19.3782 | 2.47621E-14 | 1514.88 | 55375.7 | 36.5546  | 1.55324E-15 | 5535.15 | 69138   | 12.4907  |
|         |             |         |         |          | 0.021043    | #DIV/0! | 887.933 | #DIV/0!  |
| 3.86438 | 1.0135E-08  | 2386.23 | 13120.8 | 5.49855  | 1.04427E-11 | 2519.6  | 21600.7 | 8.57307  |
| 3.65114 | 1.20086E-10 | 4302.85 | 23639.3 | 5.49387  | 2.25588E-14 | 4431.55 | 40763   | 9.19836  |
| 3.61829 | 1.04425E-15 | 3924.78 | 47161.9 | 12.0165  | 1.06485E-17 | 4380.28 | 69738   | 15.9209  |
|         | 0.00144586  | 809.85  | 377.925 | -2.14289 |             |         |         |          |
|         |             |         |         |          | 3.78292E-09 | 42447.9 | 94345.6 | 2.22262  |
|         |             |         |         |          | 1.51123E-12 | 24338.8 | 63526.2 | 2.61009  |
|         | 2.5686E-08  | 3835.73 | 7790.8  | 2.03112  | 3.15425E-10 | 3322.23 | 6986.88 | 2.10307  |
| -2.3318 |             |         |         |          |             |         |         |          |
|         | 0.000281959 | 12975.9 | 26359.1 | 2.03138  | 7.03024E-10 | 5343.38 | 19168.4 | 3.58733  |
|         |             |         |         |          | 1.68995E-10 | 13430   | 59142.6 | 4.40377  |
|         | 0.000517944 | 3519.05 | 1043.65 | -3.37187 | 4.23034E-09 | 3876.25 | 870.5   | -4.4529  |
|         |             |         |         |          | 1.79032E-13 | 2664.83 | #DIV/0! | #DIV/0!  |
|         | 1.85657E-10 | 5426.63 | 14786.8 | 2.72485  | 1.72092E-13 | 3325.13 | 11383.5 | 3.42347  |
|         |             |         |         |          | 9.00044E-10 | 4655.95 | 10561.4 | 2.26836  |
|         |             |         |         |          | 0.000242758 | 2425.5  | 942.4   | -2.57375 |
|         | 0.000108762 | 1616.93 | 683.025 | -2.3673  |             |         |         |          |
|         | 4.27012E-06 | 2364.58 | 9927.5  | 4.19843  | 0.000289067 | 2680.5  | 7638.78 | 2.84976  |
|         | 0.000273039 | 3115.38 | 9420.03 | 3.02372  | 0.000320936 | 2982.98 | 9274.18 | 3.10904  |
|         | 5.49793E-05 | 5183.63 | 20651.4 | 3.98397  | 0.000219951 | 4931.53 | 17086.2 | 3.46468  |
| 2.0019  |             |         |         |          |             |         |         |          |
|         | 4.10194E-08 | 796.8   | 221.3   | -3.60054 | 1.4902E-09  | 2073.8  | 609.167 | -3.40432 |
|         | 2.48143E-05 | 1128.65 | 511.8   | -2.20526 | 1.11373E-05 | 2264.28 | 730.775 | -3.09846 |
| -2.1105 |             |         |         |          |             |         |         |          |
|         |             |         |         |          | 5.75297E-10 | 13625.8 | 34413.6 | 2.52561  |
|         |             |         |         |          | 4.97501E-12 | 10544   | 35022.6 | 3.32156  |
|         |             |         |         |          | 1.1756E-09  | 1946.43 | 4765.98 | 2.44858  |
|         |             |         |         |          | 3.81282E-11 | 4949.8  | 14546   | 2.9387   |
|         | 0.000162814 | 3101.45 | 7937.1  | 2.55916  |             |         |         |          |
|         |             |         |         |          | 7.13547E-06 | 1922.4  | 746.2   | -2.57625 |
|         | 0.0102023   | 667.367 | #DIV/0! | #DIV/0!  |             |         |         |          |
|         |             |         |         |          | 0.020403    | 1493.1  | 4956.48 | 3.31959  |
|         | 0.012776    | 525.2   | 123.2   | -4.26299 |             |         |         |          |
|         |             |         |         |          | 5.78416E-09 | 1622.38 | 4131.33 | 2.54647  |
| -2.865  |             |         |         |          |             |         |         |          |
| -2.452  | 1.82702E-10 | 2152.25 | 551.675 | -3.9013  | 1.93774E-09 | 2046.93 | 631.275 | -3.24253 |
|         | 3.20061E-09 | 1181.63 | #DIV/0! | #DIV/0!  | 4.20019E-08 | 1760.75 | #DIV/0! | #DIV/0!  |
|         | 0.000150224 | 1797.38 | 819.4   | -2.19353 |             |         |         |          |
| #DIV/0! |             |         |         |          |             |         |         |          |
|         |             |         |         |          | 8.3674E-10  | 2882.78 | 1016.6  | -2.8357  |
|         |             |         |         |          | 1.52348E-09 | 5534.53 | 2337.35 | -2.36786 |
|         |             |         |         |          | 4.41359E-13 | 3965.95 | 11313.9 | 2.85277  |
|         |             |         |         |          | 3.26372E-15 | 5809.4  | 17595.7 | 3.02884  |
|         |             |         |         |          | 0.0159777   | 1149.48 | 463.4   | -2.48052 |
|         |             |         |         |          | 0.000792745 | 2183.83 | 786.333 | -2.77724 |
|         |             |         |         |          | 6.28753E-06 | 2104.65 | 526.85  | -3.99478 |
|         |             |         |         |          | 0.000207014 | 1415.6  | 510.5   | -2.77297 |
|         |             |         |         |          | 8.79521E-07 | 4306.38 | 954.75  | -4.51047 |
|         |             |         |         |          | 0.000143174 | 1752.3  | 682.425 | -2.56775 |
|         |             |         |         |          | 0.00221936  | 1541    | 693.175 | -2.2231  |
|         | 0.00217224  | 2181.83 | 960.2   | -2.27226 |             |         |         |          |
|         | 0.00001916  | 7814.15 | 2738.38 | -2.85357 | 1.08488E-08 | 6040.03 | 1329.25 | -4.54393 |
|         | 0.00339267  | 5105.1  | 2151.8  | -2.37248 | 0.00174729  | 3189.7  | 1248.23 | -2.55539 |
|         | 0.00103347  | 960.225 | 454.85  | -2.11108 | 0.000017551 | 1344.2  | 630.95  | -2.13044 |
| 2.96616 | 4.96353E-13 | 1754.53 | 6357.05 | 3.62323  | 2.82073E-14 | 1651.88 | 6591.05 | 3.99004  |
| 2.70395 | 9.67293E-15 | 4208.98 | 14588.2 | 3.46597  | 5.93215E-19 | 3776.85 | 18198.9 | 4.81855  |
| 3.46552 | 1.80687E-16 | 2188    | 10968.3 | 5.01295  | 8.57042E-19 | 2470.57 | 12411.9 | 5.02389  |
|         | 4.82376E-07 | 5886.23 | 2389.75 | -2.46311 | 1.16349E-08 | 3804.43 | 1341.43 | -2.83609 |
|         |             |         |         |          | 5.77627E-05 | 6142    | 2542.45 | -2.41578 |
|         |             |         |         |          | 0.00461984  | 942.433 | #DIV/0! | #DIV/0!  |
|         |             |         |         |          | 9.31517E-05 | 977.667 | 396.733 | -2.46429 |



|         |             |         |         |          |             |         |         |          |
|---------|-------------|---------|---------|----------|-------------|---------|---------|----------|
|         | 3.34961E-05 | 1069.05 | 484.45  | -2.20673 | 0.000364166 | 1309.83 | 647.2   | -2.02383 |
|         |             |         |         |          | 0.0190443   | #DIV/0! | 1660.7  | #DIV/0!  |
|         | 1.1024E-06  | 5752.48 | 19034   | 3.30884  |             |         |         |          |
| 2.10822 |             |         |         |          |             |         |         |          |
|         |             |         |         |          | 1.08849E-05 | 2823.55 | 615.5   | -4.58741 |
| 5.73378 | 1.31283E-13 | 3895.08 | 41692.1 | 10.7038  | 8.40813E-16 | 3135.4  | 38898.8 | 12.4063  |
| 7.8279  | 9.11362E-10 | 957.8   | 10752.1 | 11.2258  | 4.46564E-12 | #DIV/0! | 8667.58 | #DIV/0!  |
|         | 5.44203E-07 | 2850.58 | 6509.88 | 2.28371  | 1.52491E-07 | 2073.25 | 4987.88 | 2.40582  |
|         | 0.00125624  | 1572.85 | 4309.13 | 2.73969  | 1.26783E-10 | #DIV/0! | 3325.9  | #DIV/0!  |
|         | 6.94101E-06 | 2110.58 | 413.5   | -5.10417 | 8.5763E-06  | 4967.73 | 833.75  | -5.95829 |
|         |             |         |         |          | 0.00305884  | 1748.68 | 654.775 | -2.67065 |
| -2.3091 |             |         |         |          |             |         |         |          |
|         |             |         |         |          | 0.00667984  | 2112.27 | #DIV/0! | #DIV/0!  |
|         |             |         |         |          | 0.0127511   | #DIV/0! | 1265.45 | #DIV/0!  |
|         | 9.38667E-07 | 1496    | 3659.4  | 2.44612  |             |         |         |          |
|         | 4.24995E-07 | 1336.8  | 4657.2  | 3.48384  |             |         |         |          |
|         |             |         |         |          | 0.0038404   | #DIV/0! | 1700.25 | #DIV/0!  |
|         | 5.76267E-05 | 981.1   | 2304.38 | 2.34877  |             |         |         |          |
|         |             |         |         |          | 3.75704E-09 | 4722.98 | 10869.9 | 2.30149  |
|         |             |         |         |          | 1.00001E-06 | 3122.25 | 8642.48 | 2.76803  |
|         |             |         |         |          | 0.00400327  | 1292.53 | 378.133 | -3.41817 |
|         | 0.000381845 | 503.175 | 202     | -2.49097 | 7.04313E-05 | 1037.28 | 341.767 | -3.03504 |
|         | 0.000865872 | 650.9   | 289.1   | -2.25147 | 2.54956E-06 | 1408.53 | 559.4   | -2.51792 |
|         | 0.000817128 | 720.85  | 300.967 | -2.39512 |             |         |         |          |
|         | 0.00267283  | 610.875 | 264.867 | -2.30635 | 5.26493E-05 | 1319.13 | 327.95  | -4.02236 |
|         |             |         |         |          | 2.51607E-09 | 3872    | 1712.63 | -2.26086 |
| 3.58933 | 5.37642E-05 | 1342.75 | 4890.45 | 3.64212  | 0.000305859 | 1374.17 | 5571.05 | 4.05413  |
| 4.51975 | 2.26186E-13 | 1184.05 | 11572.8 | 9.77393  | 1.36992E-12 | 1572    | 10724.5 | 6.82217  |
| 2.16475 | 0.00318534  | 722.15  | 1706.55 | 2.36315  |             |         |         |          |
| 2.99654 |             |         |         |          |             |         |         |          |
|         |             |         |         |          | 0.00547116  | 778.2   | 261.2   | -2.97933 |
|         |             |         |         |          | 0.0157795   | 1191.93 | 253.9   | -4.6945  |
|         | 0.000813875 | 765.425 | 260.8   | -2.93491 | 0.00501846  | 1526.93 | 584.575 | -2.61203 |
|         | 0.00360376  | 1272.33 | #DIV/0! | #DIV/0!  | 0.000226315 | 1974.63 | 850.4   | -2.322   |
|         | 0.000369513 | 2995.53 | 1283.68 | -2.33355 | 0.000982124 | 6264    | 3040.8  | -2.05998 |
|         | 4.14883E-07 | 3212.13 | 6750.03 | 2.10142  |             |         |         |          |
|         |             |         |         |          | 0.00948965  | 1081.23 | 480.6   | -2.24974 |
|         |             |         |         |          | 3.63574E-05 | 3038.45 | 6870.8  | 2.26128  |
|         |             |         |         |          | 1.88019E-06 | 3823.2  | 9289.53 | 2.42978  |
|         |             |         |         |          | 0.00236519  | 1758.8  | 4651.6  | 2.64476  |
| 3.14742 | 1.07233E-15 | 1993.78 | 13212.1 | 6.62669  | 6.68018E-14 | 2154.3  | 10028.5 | 4.65512  |
| 3.57321 | 1.43579E-10 | 2034.1  | 15099.7 | 7.4233   | 2.35377E-12 | #DIV/0! | 11445.8 | #DIV/0!  |
| 2.12707 |             |         |         |          |             |         |         |          |
|         | 1.99231E-05 | 717.233 | #DIV/0! | #DIV/0!  | 2.29846E-06 | 1655.78 | 322.5   | -5.13419 |
|         |             |         |         |          | 0.000530769 | 2190.9  | 752     | -2.91343 |
| -2.5631 |             |         |         |          |             |         |         |          |
| -2.6769 | 3.30815E-05 | 919.7   | 351.575 | -2.61594 |             |         |         |          |
|         | 0.00796062  | 728.533 | 282.733 | -2.57675 | 9.02421E-05 | 2016.13 | 578.2   | -3.4869  |
|         |             |         |         |          | 7.34253E-05 | #DIV/0! | 1263.33 | #DIV/0!  |
|         | 1.54722E-05 | 902.55  | 362.8   | -2.48773 |             |         |         |          |
|         |             |         |         |          | 0.00305515  | 1160.65 | 536.875 | -2.16186 |
|         |             |         |         |          | 3.7152E-07  | #DIV/0! | 9825.28 | #DIV/0!  |
|         | 4.84266E-06 | 952.1   | 306.05  | -3.11093 | 0.000133552 | 1254.53 | 475.533 | -2.63814 |
| 2.24753 | 3.30426E-06 | 1111.7  | 3808.35 | 3.4257   | 2.27256E-06 | #DIV/0! | 3292.88 | #DIV/0!  |
| 2.35763 | 6.78969E-05 | 1145.03 | 3187.6  | 2.78387  |             |         |         |          |
| 2.25831 | 3.97287E-09 | 2445.05 | 9253.25 | 3.78448  | 1.86174E-09 | 1990.45 | 7607.2  | 3.82185  |
| 2.14241 | 1.76942E-07 | 2770.13 | 7334.33 | 2.64764  | 2.56779E-11 | 2803.7  | 10729.7 | 3.82696  |
| 2.55227 | 4.54231E-07 | 1526.2  | 4142.73 | 2.71441  | 1.51101E-07 | 2291.43 | 6301.08 | 2.74985  |
| 3.44694 | 1.25575E-05 | #DIV/0! | 4384.93 | #DIV/0!  | 1.05063E-06 | #DIV/0! | 5196.05 | #DIV/0!  |
|         | 0.000138986 | 840.525 | #DIV/0! | #DIV/0!  | 2.91835E-06 | 1840    | #DIV/0! | #DIV/0!  |
| 3.54056 | 0.000680705 | 1207.1  | 6115.28 | 5.06609  |             |         |         |          |
|         | 8.49187E-05 | 1380.38 | 647.9   | -2.13054 | 1.5867E-07  | 3097.6  | 1035.97 | -2.99006 |
|         | 2.01789E-05 | 541.95  | #DIV/0! | #DIV/0!  | 0.000208904 | 1011.9  | 344.767 | -2.93503 |

|         |             |         |         |          |             |         |         |          |
|---------|-------------|---------|---------|----------|-------------|---------|---------|----------|
|         | 0.00118215  | 1107.23 | 395.225 | -2.80151 | 3.05817E-06 | 2701.33 | 557.475 | -4.84564 |
|         |             |         |         |          | 0.00306048  | 1723.35 | 519.85  | -3.31509 |
|         | 0.00677697  | 989.433 | 274.7   | -3.60187 | 0.000237373 | 1547.95 | 572.267 | -2.70495 |
| -2.1566 | 9.77826E-06 | 7060.68 | 3232.13 | -2.18453 |             |         |         |          |
| -2.0521 | 1.98605E-09 | 21751.6 | 8015    | -2.71386 | 2.10174E-07 | 17417.1 | 7648.98 | -2.27705 |
|         | 6.60771E-08 | 32549.2 | 12081.1 | -2.69422 | 6.93456E-07 | 54368.1 | 23644   | -2.29945 |
|         | 5.57621E-09 | 3941.93 | 1545.38 | -2.55079 | 8.19914E-13 | 4719.03 | 1333.5  | -3.53883 |
|         | 0.000570278 | 3748    | 1490.45 | -2.51468 | 0.000184877 | 4213.6  | 1644.33 | -2.56251 |
| 2.13141 | 7.76545E-09 | 25951.9 | 121237  | 4.67158  | 1.38025E-13 | 24975.4 | 181776  | 7.2782   |
| 2.79342 | 2.91255E-18 | 4240.85 | 30825.9 | 7.26881  | 2.4255E-20  | 3676.63 | 31225.9 | 8.49309  |
| 3.1173  | 4.73704E-13 | 10585.8 | 83208   | 7.86032  | 9.01139E-17 | 10399   | 121345  | 11.6689  |
| 3.5258  | 2.47243E-12 | 6410.48 | 56934   | 8.88141  | 1.07234E-16 | 5361.88 | 75804.2 | 14.1376  |
| 5.12335 | 6.13303E-07 | 556.95  | 3588.73 | 6.44353  | 1.58569E-12 | #DIV/0! | 6655.88 | #DIV/0!  |
| #DIV/0! |             |         |         |          | 0.01906     | #DIV/0! | 1021.47 | #DIV/0!  |
| -2.7809 | 8.34884E-08 | 3280.98 | 1154.3  | -2.84239 | 0.000027549 | 2266.35 | 1125.75 | -2.01319 |
| -2.3693 | 1.55967E-07 | 3149.83 | 1062.2  | -2.96538 |             |         |         |          |
| -2.0566 | 8.96672E-06 | 1561.93 | 667.15  | -2.34119 |             |         |         |          |
| -2.9815 | 4.13313E-09 | 4250.45 | 1017.3  | -4.17817 | 5.84024E-10 | 4940.08 | 1027    | -4.8102  |
|         | 0.000348512 | 729.8   | 326.133 | -2.23774 |             |         |         |          |
| 3.51531 | 8.44755E-15 | 2507.8  | 9865.7  | 3.93401  | 5.17738E-13 | 2802.85 | 8650.85 | 3.08645  |
| -2.1304 | 4.79578E-06 | 1590.93 | 486.95  | -3.26712 | 0.000221787 | 1434.1  | 583.725 | -2.45681 |
| -2.2773 | 1.58291E-05 | 3536.7  | 1512.53 | -2.33826 | 8.26987E-05 | 3791.65 | 1613.38 | -2.35014 |
| -2.8961 | 2.15047E-05 | 6316.5  | 1947.2  | -3.24389 | 0.0017811   | 4308.65 | 2029.05 | -2.12348 |
|         | 5.87311E-05 | 1863.58 | 615.625 | -3.02713 | 8.56634E-07 | 4524.08 | 1130.18 | -4.00299 |
|         |             |         |         |          | 3.8217E-06  | #DIV/0! | 2078.95 | #DIV/0!  |
|         |             |         |         |          | 0.000300537 | 4921.95 | 1170.25 | -4.2059  |
|         |             |         |         |          | 0.00174765  | 1841    | #DIV/0! | #DIV/0!  |
|         | 0.000559333 | 3545.65 | 1647.7  | -2.15188 |             |         |         |          |
|         | 0.00124659  | 943.35  | 1913.1  | 2.02799  | 1.87772E-05 | #DIV/0! | 2136.05 | #DIV/0!  |
|         |             |         |         |          | 3.7626E-07  | 2719.5  | 6002.58 | 2.20723  |
|         |             |         |         |          | 6.4882E-10  | 4384.85 | 17694.9 | 4.03545  |
|         | 7.45597E-09 | 1118.2  | 393.925 | -2.83861 |             |         |         |          |
| 4.97011 | 1.07468E-10 | 5470.55 | 51753.6 | 9.46039  | 2.02837E-15 | 2250.48 | 57382.2 | 25.4978  |
| 7.10679 | 1.21158E-05 | 1193.4  | 8286.78 | 6.94384  | 2.57557E-07 | #DIV/0! | 9694.4  | #DIV/0!  |
|         |             |         |         |          | 5.70447E-09 | 1548.58 | 523.775 | -2.95657 |
|         |             |         |         |          | 2.25167E-06 | 2558.5  | 943.775 | -2.71092 |
|         |             |         |         |          | 9.4089E-08  | 1965.58 | 732.35  | -2.68393 |
|         |             |         |         |          | 2.49337E-09 | 2590.93 | 1076.65 | -2.40647 |
|         |             |         |         |          | 0.000280039 | #DIV/0! | 889.367 | #DIV/0!  |
|         |             |         |         |          | 1.61208E-05 | 1016.17 | #DIV/0! | #DIV/0!  |
| 2.65515 | 4.39757E-05 | 711.233 | 266.8   | -2.66579 | 8.25558E-10 | 14338.4 | 67547.4 | 4.71096  |
|         | 6.2789E-08  | 20220.7 | 79829.7 | 3.94791  | 0.000985395 | 756.5   | 335.125 | -2.25737 |
|         |             |         |         |          | 4.75751E-05 | 1432.05 | 429.867 | -3.33138 |
|         |             |         |         |          | 0.000649346 | 1431.05 | 551.825 | -2.5933  |
|         |             |         |         |          | 0.000139701 | 968.025 | 406.25  | -2.38283 |
| 2.17143 | 3.62898E-09 | 1133.93 | 5014.55 | 4.42226  | 2.97529E-14 | #DIV/0! | 3402.55 | #DIV/0!  |
|         | 1.72607E-07 | 13885.1 | 28488.1 | 2.0517   |             |         |         |          |
|         |             |         |         |          | 1.48716E-07 | #DIV/0! | 2460.3  | #DIV/0!  |
|         |             |         |         |          | 0.000398273 | #DIV/0! | 2019.13 | #DIV/0!  |
|         |             |         |         |          | 7.54925E-13 | 2582.03 | 10929.1 | 4.23277  |
|         |             |         |         |          | 0.00152069  | 1437.6  | 416.6   | -3.45079 |
|         |             |         |         |          | 0.0145973   | 539.675 | 180.3   | -2.99321 |
|         | 7.78057E-06 | 4047.73 | 1370.4  | -2.95368 | 2.00667E-07 | 4062.58 | 1202.5  | -3.37844 |
|         |             |         |         |          | 0.00304764  | 820.8   | 394     | -2.08325 |
| -2.3874 |             |         |         |          | 1.30447E-05 | 3401.45 | 1581.2  | -2.15118 |
| -2.216  | 4.19565E-08 | 4672.65 | 1502.18 | -3.11059 | 3.43038E-05 | 2547.7  | 1241.63 | -2.05191 |
| -2.3456 |             |         |         |          |             |         |         |          |
|         |             |         |         |          | 1.22063E-08 | 3744.15 | 9618.15 | 2.56885  |
|         |             |         |         |          | 9.45261E-13 | 2846.1  | 8152.1  | 2.86431  |
|         | 3.10766E-05 | 4092.15 | 8370.85 | 2.04559  | 1.31018E-10 | 2459.43 | 8498.1  | 3.45532  |
|         |             |         |         |          | 0.00273688  | #DIV/0! | 622.267 | #DIV/0!  |
|         | 8.15239E-06 | 2712.78 | 6101.03 | 2.249    |             |         |         |          |
|         | 8.77779E-06 | 1244.1  | 2890.08 | 2.32302  |             |         |         |          |

|         |             |         |         |          |             |         |         |          |
|---------|-------------|---------|---------|----------|-------------|---------|---------|----------|
| 2.6965  | 4.08272E-08 | 2605.75 | 10238   | 3.929    | 2.63989E-11 | 2101.77 | 8339.03 | 3.96763  |
| 3.1296  | 3.88408E-12 | 4546.6  | 20934.8 | 4.60448  | 2.40832E-15 | 2576.58 | 17436.8 | 6.76742  |
|         |             |         |         |          | 0.000219958 | #DIV/0! | 1855.1  | #DIV/0!  |
|         | 4.96974E-06 | 7880.95 | 18504.6 | 2.34802  | 8.56963E-10 | 2964.3  | 10300   | 3.47468  |
|         |             |         |         |          | 2.25139E-07 | 2963.65 | 5978.35 | 2.01723  |
|         |             |         |         |          | 5.4664E-10  | 1960.05 | 356.9   | -5.49187 |
| -2.1967 |             |         |         |          | 0.00466406  | #DIV/0! | 1264.7  | #DIV/0!  |
|         |             |         |         |          | 0.00267798  | 873.267 | 384.367 | -2.27196 |
|         |             |         |         |          | 0.000897545 | 478     | 2566.8  | 5.36987  |
|         |             |         |         |          | 0.0136181   | 889.6   | 386.7   | -2.30049 |
| -2.7998 | 0.000502187 | 3244.28 | 1236.5  | -2.62376 |             |         |         |          |
| -2.8121 |             |         |         |          | 0.00746492  | 1310.3  | 420.533 | -3.11581 |
|         |             |         |         |          | 0.0184793   | 1270.85 | 447.767 | -2.8382  |
|         | 7.60563E-08 | 30013.4 | 88951.9 | 2.96374  | 1.02396E-06 | 66825.6 | 156568  | 2.34293  |
|         | 1.53964E-06 | 22878.7 | 70007.7 | 3.05995  | 1.07716E-05 | 50460.6 | 132191  | 2.61969  |
|         | 0.00374749  | 775     | 146.6   | -5.28649 |             |         |         |          |
|         |             |         |         |          | 6.37004E-06 | 2835.23 | 5790.88 | 2.04247  |
|         |             |         |         |          | 1.48182E-13 | 6154.73 | 14977.4 | 2.43348  |
|         | 0.000333292 | 373.5   | 1137.33 | 3.04507  |             |         |         |          |
|         |             |         |         |          | 1.14293E-05 | 2255.97 | 5627.93 | 2.49468  |
|         |             |         |         |          | 1.24407E-10 | 10046.2 | 29649.9 | 2.95136  |
|         |             |         |         |          | 1.84269E-10 | 4054.88 | 12268.4 | 3.02558  |
| -2.0301 |             |         |         |          |             |         |         |          |
| 8.86322 | 6.25815E-17 | 2040.03 | 17836.9 | 8.74346  | 3.3646E-12  | 3671.78 | 15042.8 | 4.09687  |
| -2.1113 |             |         |         |          |             |         |         |          |
|         | 0.000973921 | 1857.4  | 778.433 | -2.38607 | 0.000517945 | 2580.78 | 1213.43 | -2.12685 |
| -2.8746 | 0.00191465  | 655.35  | 285.2   | -2.29786 | 0.00020804  | 793.833 | 388.767 | -2.04193 |
| -2.2123 | 7.98534E-09 | 1584.05 | 312.275 | -5.07261 | 4.44791E-10 | 3476.6  | 617.9   | -5.62648 |
|         |             |         |         |          | 0.0114333   | 2196.93 | 575.475 | -3.81759 |
|         | 5.24607E-11 | 885.875 | 245     | -3.61582 | 1.59295E-07 | 1306.93 | 423.225 | -3.08801 |
|         |             |         |         |          | 0.00280208  | 1376.45 | 601.675 | -2.2877  |
|         |             |         |         |          | 0.017212    | 1171.2  | 520.1   | -2.25187 |
| #DIV/0! |             |         |         |          |             |         |         |          |
|         | 0.000159254 | 1333.65 | 659.5   | -2.02221 |             |         |         |          |
|         |             |         |         |          | 6.49513E-06 | 2156.1  | 865.575 | -2.49095 |
|         | 0.00121752  | 4211.48 | 1876.4  | -2.24444 | 1.66229E-05 | 1867.15 | 815.533 | -2.28948 |
|         | 0.00585323  | 802.567 | 226.4   | -3.54491 |             |         |         |          |
|         | 0.000204018 | 5069.93 | 11258   | 2.22054  | 0.00112415  | 3518    | 7184.6  | 2.04224  |
|         |             |         |         |          | 8.72364E-09 | 2389.23 | 5321.5  | 2.22729  |
|         |             |         |         |          | 6.23388E-09 | 1924.87 | 4484.55 | 2.3298   |
|         | 7.31042E-05 | #DIV/0! | 7102.23 | #DIV/0!  | 6.10349E-07 | #DIV/0! | 7653.9  | #DIV/0!  |
|         |             |         |         |          | 0.0022469   | 2892.43 | 590.5   | -4.89826 |
|         |             |         |         |          | 1.84116E-06 | 2030.5  | 586.85  | -3.46    |
|         |             |         |         |          | 5.84097E-06 | 1539.38 | 576.5   | -2.67021 |
|         | 3.43801E-05 | 2776.83 | 1375.98 | -2.01808 | 9.50897E-09 | 6371.73 | 2148.73 | -2.96535 |
|         |             |         |         |          | 2.02657E-06 | 1326.65 | 549.65  | -2.41363 |
| 4.14203 | 1.4439E-12  | 2131.8  | 16995.5 | 7.97236  | 4.42203E-16 | 1529.4  | 19722.1 | 12.8953  |
| 3.56638 | 3.30414E-13 | 8427    | 65027.3 | 7.71654  | 6.51658E-19 | 5278.85 | 89035   | 16.8664  |
|         | 1.23109E-05 | 2148.43 | 930.975 | -2.30772 | 4.98451E-06 | 2228.85 | 976.6   | -2.28225 |
| -2.6414 | 1.59065E-09 | 31091.9 | 7369.83 | -4.2188  |             |         |         |          |
| 4.00806 | 1.12412E-12 | 2463.58 | 14134.8 | 5.73753  | 4.01955E-13 | 3566.9  | 12427.9 | 3.48422  |
| 4.67901 | 3.88742E-14 | 2885.43 | 24994.4 | 8.66229  | 1.41672E-11 | 3587.2  | 22081.8 | 6.15571  |
|         | 9.5189E-12  | 4061.53 | 10883.8 | 2.67973  | 7.58115E-12 | 2947.53 | 7835.83 | 2.65844  |
|         | 3.28999E-08 | 12227.9 | 32877.1 | 2.68869  | 4.591E-12   | 5414.58 | 22751.2 | 4.20183  |
|         |             |         |         |          | 3.43404E-09 | 4255.48 | 10113.3 | 2.37653  |
|         |             |         |         |          | 1.45151E-10 | 8954.15 | 25530.5 | 2.85124  |
|         | 0.00129083  | 3589.25 | 7213.13 | 2.00965  |             |         |         |          |
| 2.36811 | 3.06373E-07 | 10393.1 | 37763.7 | 3.63352  | 4.61556E-12 | 5281.4  | 29675.6 | 5.61889  |
| -3.0245 |             |         |         |          |             |         |         |          |
|         |             |         |         |          | 0.0139245   | 1233.57 | 522.133 | -2.36255 |
|         |             |         |         |          | 2.00982E-05 | 2030.45 | 809.175 | -2.50928 |

|         |             |         |         |          |             |         |         |          |
|---------|-------------|---------|---------|----------|-------------|---------|---------|----------|
| -3.2342 | 2.05117E-11 | 3264.28 | 796.775 | -4.09686 | 8.23184E-08 | 3820.7  | 1459.7  | -2.61746 |
| -2.3111 | 9.36238E-06 | 2006.58 | 919.75  | -2.18165 | 2.12464E-06 | 2481.3  | 1029.35 | -2.41055 |
|         | 0.00155992  | 724.025 | #DIV/0! | #DIV/0!  |             |         |         |          |
|         |             |         |         |          | 5.00882E-07 | 4262.55 | 9954.75 | 2.3354   |
|         |             |         |         |          | 2.62024E-13 | 2873.75 | 9607.75 | 3.34328  |
|         | 4.38519E-08 | 15339.4 | 38955.7 | 2.53959  | 1.81093E-15 | 5539.78 | 29038.5 | 5.24181  |
|         | 1.11964E-05 | 3897.25 | 7936.25 | 2.03637  |             |         |         |          |
|         | 0.0101273   | 638.633 | 216.967 | -2.94346 |             |         |         |          |
|         |             |         |         |          | 1.05263E-14 | 8638.45 | 22851.5 | 2.64532  |
| 3.92926 | 2.50575E-05 | 620     | 2148.73 | 3.46569  |             |         |         |          |
|         |             |         |         |          | 0.000272473 | 1436.37 | 516.8   | -2.77935 |
| 20.318  | 5.62203E-13 | 1740.7  | 48561.5 | 27.8977  | 2.77696E-13 | 11472.8 | 63887.5 | 5.56861  |
|         | 5.87541E-05 | 725.2   | 269.6   | -2.68991 | 0.000397585 | 784.3   | 341.85  | -2.29428 |
| -2.2671 |             |         |         |          |             |         |         |          |
| -2.0233 |             |         |         |          |             |         |         |          |
|         | 3.07608E-05 | 691.775 | 229.6   | -3.01296 | 4.98615E-07 | 1585.18 | 546.467 | -2.90077 |
| -2.872  | 1.58647E-06 | 4721.7  | 1150.53 | -4.10395 |             |         |         |          |
| -3.8244 | 7.01714E-05 | 2102.1  | 664.975 | -3.16117 |             |         |         |          |
|         | 0.000457298 | 2075.05 | 661.05  | -3.13902 |             |         |         |          |
|         |             |         |         |          | 0.000905997 | #DIV/0! | 1322.6  | #DIV/0!  |
|         |             |         |         |          | 2.68127E-07 | 1502.4  | 557.4   | -2.69537 |
|         |             |         |         |          | 0.000158422 | 4949.38 | 1135.63 | -4.35828 |
| 2.93848 | 0.00024273  | 838.025 | 1944.7  | 2.32058  |             |         |         |          |
| 2.7665  |             |         |         |          |             |         |         |          |
| 5.64535 | 2.31719E-09 | 2200.63 | 50643.3 | 23.0131  | 1.11329E-11 | 5956.4  | 33254.7 | 5.58302  |
| 5.16745 | 8.2132E-11  | 3709.48 | 72215.8 | 19.4679  | 4.86673E-13 | 4184.25 | 55395.5 | 13.2391  |
|         | 2.88415E-09 | 2701.65 | 7878.38 | 2.91613  | 2.04813E-07 | 1850.03 | 3829.35 | 2.06988  |
|         | 4.76329E-10 | 15747.2 | 78790.4 | 5.00346  | 1.57152E-14 | 7305.8  | 57991.3 | 7.9377   |
|         | 3.70949E-10 | 19291.7 | 86949.7 | 4.50711  | 3.52947E-15 | 8320.78 | 66794.4 | 8.02743  |
| -2.6635 |             |         |         |          |             |         |         |          |
|         |             |         |         |          | 6.60039E-07 | 2683.2  | #DIV/0! | #DIV/0!  |
|         |             |         |         |          | 0.000524868 | 1363.3  | 545.4   | -2.49963 |
|         |             |         |         |          | 1.62082E-05 | 5044.2  | 2482.48 | -2.03192 |
|         | 3.09503E-07 | #DIV/0! | 1856.43 | #DIV/0!  | 9.89255E-06 | #DIV/0! | 4824.68 | #DIV/0!  |
|         |             |         |         |          | 0.00575505  | 1229.95 | 409.6   | -3.00281 |
|         |             |         |         |          | 0.0095485   | #DIV/0! | 807.525 | #DIV/0!  |
|         |             |         |         |          | 1.46422E-06 | 4264.25 | 9548.48 | 2.23919  |
|         |             |         |         |          | 0.000161154 | 1068.4  | 2592.97 | 2.42696  |
|         |             |         |         |          | 1.73258E-08 | 2765.35 | 8301    | 3.00179  |
|         | 0.00868129  | #DIV/0! | 817.4   | #DIV/0!  |             |         |         |          |
|         | 2.90875E-07 | 30171   | 69685.4 | 2.30968  | 9.40405E-12 | 18793.1 | 71151   | 3.78603  |
|         | 3.41098E-06 | 17307.1 | 47904.2 | 2.76789  | 1.59474E-09 | 8391.75 | 42413.2 | 5.05415  |
|         | 0.0037774   | 727.05  | 309.775 | -2.34703 | 5.58817E-06 | 2242.13 | 491.15  | -4.56505 |
|         | 9.23479E-06 | 2725.28 | 8648.33 | 3.17338  | 3.99838E-06 | 1815.93 | 5686.35 | 3.13138  |
|         | 4.04822E-08 | 21443.5 | 44469.4 | 2.07379  | 2.59623E-14 | 11810.8 | 41344.1 | 3.50054  |
|         | 5.93901E-07 | 1977.4  | 5664.7  | 2.86472  | 1.25811E-06 | #DIV/0! | 3915.7  | #DIV/0!  |
|         |             |         |         |          | 5.10975E-13 | 15289.7 | 3622.2  | -4.22111 |
|         |             |         |         |          | 1.94721E-20 | 6157.43 | 36864.9 | 5.98706  |
|         | 8.9472E-07  | 6883.73 | 18341.8 | 2.66452  | 3.29001E-16 | 2705.98 | 27587.5 | 10.195   |
|         | 2.79151E-08 | 4452.9  | 11610   | 2.60728  | 1.21703E-06 | 3408.23 | 7512.6  | 2.20426  |
|         | 7.02765E-08 | 7340.63 | 18955.9 | 2.58232  | 1.08254E-08 | 4614.38 | 12843.7 | 2.78342  |
|         |             |         |         |          | 0.00445576  | 983.467 | 437.075 | -2.25011 |
|         |             |         |         |          |             |         |         |          |
|         |             |         |         |          | 8.34645E-07 | 1976.43 | 4677.98 | 2.36688  |
|         | 1.66692E-08 | 10439.9 | 22925.5 | 2.19595  | 1.6612E-09  | 7436.03 | 16067   | 2.16069  |
|         | 0.0140839   | 903.075 | 410.375 | -2.20061 | 0.000212456 | 2165.75 | 901.033 | -2.40363 |
|         | 0.0010934   | 1099.05 | 354     | -3.10466 |             |         |         |          |
|         |             |         |         |          | 7.95347E-06 | 1694.27 | 527.35  | -3.21279 |
| 2.28743 | 0.00249292  | #DIV/0! | 2174.73 | #DIV/0!  | 0.000194675 | #DIV/0! | 2196.18 | #DIV/0!  |
|         |             |         |         |          | 0.000178438 | 2901.43 | 687.85  | -4.21811 |
|         |             |         |         |          | 0.0124015   | 1601.5  | 425.267 | -3.76587 |
| 2.31768 | 2.0259E-08  | 4918.48 | 14401.8 | 2.9281   |             |         |         |          |
|         | 0.00199358  | 575.75  | #DIV/0! | #DIV/0!  | 0.000199988 | 1462.47 | 296.367 | -4.93465 |

|         |             |         |         |          |             |         |         |          |
|---------|-------------|---------|---------|----------|-------------|---------|---------|----------|
|         | 4.83583E-05 | 1562.9  | 460.275 | -3.39558 | 1.18327E-05 | 3831.33 | 1080.1  | -3.54719 |
|         |             |         |         |          | 8.06011E-06 | 790.95  | 309.2   | -2.55805 |
| -2.6802 |             |         |         |          | 2.22337E-06 | 2680.4  | 1019.1  | -2.63016 |
|         |             |         |         |          | 0.000679418 | 1386.33 | 669.45  | -2.07084 |
|         | 1.94921E-05 | 1056.27 | 306.55  | -3.44566 | 7.04726E-08 | 5744.18 | 15215   | 2.64877  |
|         | 0.000337752 | 17344.7 | 6144.35 | -2.82286 |             |         |         |          |
|         | 0.0019478   | 21050.9 | 9425.5  | -2.23339 |             |         |         |          |
|         | 1.36613E-05 | 939.125 | 442.5   | -2.12232 | 7.6954E-06  | 2027.43 | 624.767 | -3.24509 |
|         | 0.00724833  | 884.967 | 389.4   | -2.27264 | 0.00139033  | 1873.15 | 680.3   | -2.75342 |
|         | 0.00277014  | 1613.88 | 733.75  | -2.19949 |             |         |         |          |
|         | 0.00166721  | 732.633 | #DIV/0! | #DIV/0!  |             |         |         |          |
|         | 0.00777832  | 964.175 | 348.55  | -2.76625 | 0.00123642  | 2792.35 | 670.85  | -4.16241 |
|         |             |         |         |          | 0.0166872   | 760.667 | #DIV/0! | #DIV/0!  |
|         | 0.000687708 | 954.7   | 404.775 | -2.35859 |             |         |         |          |
| 3.85347 | 5.32202E-07 | 820.8   | 4306.88 | 5.24717  | 2.93859E-09 | #DIV/0! | 5056.13 | #DIV/0!  |
|         |             |         |         |          | 0.000368545 | 2127.9  | 888.4   | -2.3952  |
|         | 1.69228E-08 | 1352.9  | 516.15  | -2.62114 |             |         |         |          |
| -2.5103 | 0.000640476 | 4589.65 | 1955.65 | -2.34687 | 3.99152E-06 | 998.1   | 2338.73 | 2.34318  |
|         |             |         |         |          | 0.000040953 | 1053.58 | 375.5   | -2.80579 |
|         | 3.61914E-05 | 928.75  | 458.975 | -2.02353 |             |         |         |          |
| 4.55573 | 0.0096743   | #DIV/0! | 760.75  | #DIV/0!  | 3.34284E-15 | 4276.3  | 16921.1 | 3.95695  |
|         | 1.48931E-08 | 7471.28 | 15257.7 | 2.04218  | 1.3464E-15  | 4227.28 | 17302.4 | 4.09303  |
|         |             |         |         |          | 1.81934E-08 | #DIV/0! | 9384.75 | #DIV/0!  |
|         | 0.0013519   | 898.55  | 374.05  | -2.40222 |             |         |         |          |
|         |             |         |         |          | 0.00023069  | 3009.1  | 599.775 | -5.01705 |
|         |             |         |         |          | 1.77491E-10 | 46367.8 | 170424  | 3.67548  |
|         | 0.000101589 | 1270.53 | 422.133 | -3.00979 |             |         |         |          |
|         |             |         |         |          | 0.00180026  | 995.8   | 402.3   | -2.47527 |
|         |             |         |         |          | 5.33281E-05 | #DIV/0! | 2411.2  | #DIV/0!  |
|         |             |         |         |          | 0.00669864  | #DIV/0! | 1262.3  | #DIV/0!  |
|         | 0.00195625  | 527.833 | #DIV/0! | #DIV/0!  |             |         |         |          |
|         | 3.90201E-05 | 2278.15 | 1108.45 | -2.05526 | 0.000140525 | 918.467 | 1837.05 | 2.00013  |
|         |             |         |         |          | 0.000568138 | 2104.55 | #DIV/0! | #DIV/0!  |
|         |             |         |         |          | 1.49527E-05 | 964.5   | 315.05  | -3.06142 |
|         |             |         |         |          | 4.09581E-07 | 1168.9  | #DIV/0! | #DIV/0!  |
|         | 2.59033E-05 | 676.45  | 263.467 | -2.5675  | 6.10533E-06 | 3567.55 | 7274.6  | 2.0391   |
|         |             |         |         |          | 0.0122454   | #DIV/0! | 1642.45 | #DIV/0!  |
|         |             |         |         |          | 5.02243E-10 | 1994.7  | 5264.78 | 2.63938  |
|         | 0.000621855 | 552.25  | 271.133 | -2.03682 | 0.000122925 | 1286.2  | 420.15  | -3.06129 |
|         |             |         |         |          | 3.61668E-06 | 2400.43 | 1061.63 | -2.26109 |
|         |             |         |         |          | 3.44705E-08 | 2317.28 | 4733.95 | 2.0429   |
|         |             |         |         |          | 1.49724E-05 | 5605.9  | 13981.3 | 2.49403  |
|         | 3.82097E-05 | 1743.7  | 674.133 | -2.58658 |             |         |         |          |
|         | 1.02092E-05 | 928     | 297.2   | -3.12248 | 5.71424E-05 | 1139.53 | 377.633 | -3.01754 |
|         |             |         |         |          | 2.325E-07   | 6078.98 | 12914.8 | 2.1245   |
|         |             |         |         |          | 0.00159274  | 1298.73 | 414.25  | -3.13512 |
|         |             |         |         |          | 0.00103825  | #DIV/0! | 2112.65 | #DIV/0!  |
|         |             |         |         |          | 1.92325E-08 | 4371.83 | 1870.45 | -2.33731 |
|         |             |         |         |          | 4.03133E-05 | #DIV/0! | 1274.18 | #DIV/0!  |
|         |             |         |         |          | 9.84476E-10 | 1889.7  | 3947.88 | 2.08915  |
|         |             |         |         |          | 8.38843E-05 | 1105.8  | 387.8   | -2.85147 |
|         |             |         |         |          | 0.00202123  | 1324.28 | 474.7   | -2.78971 |
|         |             |         |         |          | 3.24595E-07 | 2666.88 | #DIV/0! | #DIV/0!  |
|         |             |         |         |          | 0.00285153  | 1404.85 | 700.875 | -2.00442 |
|         | 8.55439E-07 | 1951.35 | 17324.3 | 8.8781   | 1.17042E-10 | 1327.5  | 21354.3 | 16.0861  |



|         |             |         |         |          |             |         |         |          |
|---------|-------------|---------|---------|----------|-------------|---------|---------|----------|
| 4.52836 | 7.52026E-07 | 2911.2  | 23050   | 7.91771  | 1.77884E-10 | 2211.2  | 39646.1 | 17.9297  |
| 4.59274 | 0.000384701 | 1767.4  | 12743.9 | 7.21054  | 1.36711E-07 | #DIV/0! | 20330.3 | #DIV/0!  |
|         | 4.22381E-08 | 805.2   | 2813.55 | 3.49423  | 1.78896E-12 | 1246.3  | 8040.63 | 6.4516   |
|         | 1.75883E-07 | 1293.18 | 4787.95 | 3.70248  | 4.28413E-13 | 609.8   | 7386.73 | 12.1134  |
|         |             |         |         |          | 4.23919E-07 | #DIV/0! | 4750.68 | #DIV/0!  |
|         |             |         |         |          | 0.000111038 | #DIV/0! | 2272.28 | #DIV/0!  |
|         | 6.16511E-06 | 1258.9  | 579.9   | -2.17089 | 8.21946E-06 | 1579.07 | 738.725 | -2.13756 |
|         |             |         |         |          | 0.000146811 | 841.633 | 295.2   | -2.85106 |
|         | 0.00180521  | 1171.67 | 484.9   | -2.41631 | 2.10756E-05 | 2490.83 | 803.975 | -3.09814 |
|         |             |         |         |          | 2.33143E-12 | 5373.5  | 18330.4 | 3.41126  |
| 2.16617 | 1.55054E-06 | 2163.88 | 5608.35 | 2.59181  | 3.38865E-09 | 1864.97 | 5776.55 | 3.0974   |
|         | 1.0515E-06  | 5301.1  | 15959.6 | 3.01063  | 4.56643E-11 | 2424.75 | 12050.6 | 4.96983  |
|         | 1.52617E-05 | 1955.13 | 3995.53 | 2.04362  |             |         |         |          |
| 2.47312 | 0.000525969 | 633.075 | 1643.68 | 2.59634  |             |         |         |          |
|         |             |         |         |          | 0.00116648  | 2359.35 | 553.6   | -4.26183 |
|         | 0.00147192  | #DIV/0! | 748.675 | #DIV/0!  | 0.00500772  | #DIV/0! | 1747.13 | #DIV/0!  |
|         | 0.000030803 | 961.633 | 378.5   | -2.54064 |             |         |         |          |
|         | 0.00103989  | 890.6   | 434.733 | -2.04861 |             |         |         |          |
|         | 0.00837314  | 658.967 | #DIV/0! | #DIV/0!  |             |         |         |          |
|         | 6.04096E-06 | 19381   | 54822.8 | 2.82869  | 7.09539E-10 | 9119.38 | 37371.1 | 4.09799  |
|         | 1.54609E-06 | 19665.7 | 62172.4 | 3.16146  | 8.73778E-11 | 9130.3  | 45878.1 | 5.02482  |
|         |             |         |         |          | 0.000768889 | 2479.9  | 1221.73 | -2.02983 |
|         |             |         |         |          | 1.44398E-16 | 7016.93 | 26756.7 | 3.81317  |
|         | 2.46755E-06 | 1444.83 | 3175.85 | 2.19809  |             |         |         |          |
| -2.2315 | 2.09523E-05 | 13062.6 | 5114.43 | -2.55407 |             |         |         |          |
| -2.4652 |             |         |         |          |             |         |         |          |
| #DIV/0! |             |         |         |          |             |         |         |          |
|         | 0.000430403 | 1003.38 | 277.175 | -3.62001 | 0.000865314 | 1595.35 | 461.2   | -3.45913 |
| -2.0534 |             |         |         |          | 0.000722191 | 1112.67 | 551.9   | -2.01607 |
| -2.7432 |             |         |         |          |             |         |         |          |
|         | 0.00445237  | #DIV/0! | 2024.13 | #DIV/0!  | 5.41817E-06 | #DIV/0! | 1708.28 | #DIV/0!  |
| -2.1004 |             |         |         |          |             |         |         |          |
|         |             |         |         |          | 1.19402E-09 | 2803.78 | 7078.93 | 2.52478  |
|         |             |         |         |          | 6.88651E-13 | 7146.7  | 21354.3 | 2.98799  |
|         |             |         |         |          | 1.60126E-10 | 3877.55 | 13800.5 | 3.55907  |
|         | 1.99606E-06 | 17848.5 | 7226    | -2.47004 |             |         |         |          |
|         |             |         |         |          | 0.00186844  | 8431.35 | 19374.6 | 2.29793  |
|         |             |         |         |          | 4.35826E-11 | 4727.53 | 13639.3 | 2.88507  |
|         | 3.8854E-06  | 4499.25 | 10395.8 | 2.31056  |             |         |         |          |
|         |             |         |         |          | 0.000439855 | #DIV/0! | 3243.15 | #DIV/0!  |
| 2.30676 |             |         |         |          | 1.10597E-09 | #DIV/0! | 3145.8  | #DIV/0!  |
| 3.38052 | 1.91035E-11 | 4517.28 | 26233.8 | 5.80744  | 8.20625E-15 | 2895.88 | 26011.1 | 8.98212  |
| 4.10814 | 7.77258E-14 | 1970    | 22764   | 11.5553  | 1.96782E-16 | 1786.3  | 18419.2 | 10.3114  |
|         | 1.75127E-12 | 13571.6 | 45966.4 | 3.38696  | 2.53985E-17 | 6115.88 | 33324.6 | 5.44886  |
|         |             |         |         |          | 1.07402E-05 | 2996.23 | 899.2   | -3.3321  |
|         | 1.29837E-10 | 17101.8 | 38690.4 | 2.26236  | 1.09969E-17 | 8020    | 31256.8 | 3.89736  |
| -2.571  |             |         |         |          | 0.00196935  | #DIV/0! | 883.725 | #DIV/0!  |
| -2.3811 |             |         |         |          |             |         |         |          |
| 2.61119 | 2.44516E-06 | 3106.25 | 8091.45 | 2.60489  | 1.75867E-13 | 1315.73 | 8694.93 | 6.60847  |
| 2.31484 | 0.000017883 | #DIV/0! | 1603.1  | #DIV/0!  | 8.90147E-05 | #DIV/0! | 1239.4  | #DIV/0!  |
|         |             |         |         |          | 3.35285E-07 | #DIV/0! | 3746.28 | #DIV/0!  |
|         |             |         |         |          | 7.87994E-05 | 1967.98 | 556.2   | -3.53825 |
|         | 2.92336E-06 | 2162.35 | 889.025 | -2.43227 |             |         |         |          |
|         |             |         |         |          | 0.00375115  | 689.167 | 210.9   | -3.26774 |
|         |             |         |         |          | 1.87142E-17 | 5599.28 | 18151.2 | 3.24171  |
|         |             |         |         |          | 2.13932E-13 | 4128.45 | 12671.5 | 3.06931  |
|         |             |         |         |          | 0.00189164  | 812.525 | 333.1   | -2.43928 |
|         |             |         |         |          | 2.94081E-14 | #DIV/0! | 2301.05 | #DIV/0!  |
|         |             |         |         |          | 0.00157949  | 1224.13 | 559.65  | -2.18732 |
|         |             |         |         |          | 4.15046E-08 | 5190.83 | 12905.9 | 2.48629  |
|         |             |         |         |          | 2.16545E-05 | 6065.75 | 15198.2 | 2.50557  |

|         |             |         |         |          |             |         |         |          |
|---------|-------------|---------|---------|----------|-------------|---------|---------|----------|
| 3.45008 | 4.72537E-05 | 890.65  | 2334.68 | 2.62132  | 5.71533E-05 | #DIV/0! | 1609.95 | #DIV/0!  |
|         |             |         |         |          | 6.95424E-07 | 3280.48 | 6981.53 | 2.12821  |
|         |             |         |         |          | 0.000079991 | #DIV/0! | 3653.68 | #DIV/0!  |
|         | 1.26322E-05 | 2972.63 | 1216.7  | -2.44319 |             |         |         |          |
|         | 2.53291E-07 | 17842.7 | 8696.53 | -2.05171 |             |         |         |          |
|         | 9.99936E-10 | 13275   | 5219.98 | -2.54312 |             |         |         |          |
|         | 3.14182E-07 | 10735.8 | 4991.4  | -2.15086 |             |         |         |          |
|         |             |         |         |          | 2.5929E-06  | 1258.6  | 363.425 | -3.46316 |
|         |             |         |         |          | 0.0216309   | 999.35  | 493.175 | -2.02636 |
|         | 1.13113E-10 | 3279.98 | 8552.08 | 2.60736  | 2.51095E-17 | 1310.93 | 6853    | 5.22761  |
|         |             |         |         |          | 6.42467E-10 | 3211.85 | 9287.28 | 2.89157  |
|         |             |         |         |          | 3.16484E-06 | 2117.55 | 5184.85 | 2.44851  |
|         | 2.32209E-10 | 9571.85 | 20404.8 | 2.13175  | 7.32631E-19 | 4265.25 | 18596   | 4.35987  |
|         |             |         |         |          | 9.85428E-14 | 5463.78 | 11491.5 | 2.10321  |
| -5.5664 | 4.08377E-07 | 25434.6 | 4747.23 | -5.35779 |             |         |         |          |
|         |             |         |         |          | 1.95503E-05 | 1060.6  | 3069.78 | 2.89438  |
|         |             |         |         |          | 1.04502E-09 | 6725.65 | 22236.5 | 3.30622  |
|         |             |         |         |          | 2.95889E-10 | 8807.25 | 29692.6 | 3.37138  |
|         |             |         |         |          | 3.94068E-09 | 1804.83 | 4151.15 | 2.30003  |
|         |             |         |         |          | 9.17879E-05 | #DIV/0! | 1787.85 | #DIV/0!  |
| -3.9051 | 2.39208E-07 | 2377.78 | 459.825 | -5.17104 | 0.0054278   | 2001.75 | 913.85  | -2.19046 |
|         |             |         |         |          | 9.04743E-12 | #DIV/0! | 2351.78 | #DIV/0!  |
|         | 0.010597    | 920.633 | 376.95  | -2.44232 |             |         |         |          |
|         | 1.81718E-05 | 1325.4  | 623.025 | -2.12736 | 1.72784E-07 | 1577.63 | 675     | -2.33722 |
| -2.5606 | 9.18951E-11 | 5250.93 | 1582.5  | -3.31812 |             |         |         |          |
| 4.66782 | 0.000227128 | 534.4   | 1170.18 | 2.1897   |             |         |         |          |
|         |             |         |         |          | 7.16554E-10 | 4698.83 | 10703.6 | 2.27793  |
|         |             |         |         |          | 5.0176E-08  | #DIV/0! | 4581.53 | #DIV/0!  |
|         | 0.000417041 | 1482.9  | 698     | -2.1245  |             |         |         |          |
|         |             |         |         |          | 2.35758E-05 | 1980.75 | 650.35  | -3.04567 |
|         |             |         |         |          | 0.00119074  | 1694.28 | 727.65  | -2.32842 |
|         |             |         |         |          | 4.91834E-08 | 8837.18 | 22592.6 | 2.55654  |
|         |             |         |         |          | 2.97391E-10 | 5516.48 | 15928.6 | 2.88746  |
|         |             |         |         |          | 5.92798E-07 | 9337.58 | 1260.83 | -7.40592 |
|         |             |         |         |          | 2.05454E-07 | 4361.25 | 1609.6  | -2.70952 |
| #DIV/0! | 0.00210051  | #DIV/0! | 1311.93 | #DIV/0!  |             |         |         |          |
|         | 8.0257E-07  | 2366.38 | 506.95  | -4.66787 |             |         |         |          |
|         | 4.44575E-06 | 2080.68 | 707.85  | -2.93943 |             |         |         |          |
|         |             |         |         |          | 5.43869E-05 | 1308.57 | #DIV/0! | #DIV/0!  |
|         |             |         |         |          | 0.000320158 | 1536.97 | #DIV/0! | #DIV/0!  |
|         |             |         |         |          | 0.0015006   | 1128.7  | 382.2   | -2.95317 |
|         |             |         |         |          | 1.79863E-05 | 1819.13 | 648.8   | -2.80383 |
|         |             |         |         |          | 6.08954E-07 | 939.133 | 356.7   | -2.63284 |
|         | 2.64104E-08 | 1460.65 | 518.8   | -2.81544 | 5.83013E-08 | 1481.1  | 673.8   | -2.19813 |
|         |             |         |         |          | 0.00136028  | 1817.53 | 481.633 | -3.77367 |
| -2.6416 | 1.9336E-06  | 1776.95 | 488.475 | -3.63775 | 4.87052E-06 | 1846.78 | 564.35  | -3.27239 |
| -2.7443 | 9.37167E-06 | 1233.45 | 325.367 | -3.79095 | 2.21646E-06 | 1788.93 | 589.1   | -3.03671 |
|         |             |         |         |          | 2.15587E-05 | 1638.15 | 602.8   | -2.71757 |
|         | 3.48274E-05 | 1923.23 | 712.925 | -2.69765 | 5.90509E-09 | 4066.75 | 848.233 | -4.79438 |
|         | 0.000634453 | 1056.93 | 388.45  | -2.72088 | 8.96058E-06 | 2090.7  | 508.525 | -4.1113  |
|         |             |         |         |          | 1.17922E-06 | #DIV/0! | 2954.08 | #DIV/0!  |
|         |             |         |         |          | 9.00188E-09 | 15727.9 | 34725.6 | 2.2079   |
|         |             |         |         |          | 1.26111E-05 | 2989.8  | 8106.95 | 2.71154  |
|         |             |         |         |          | 8.53527E-06 | 11367.7 | 4788.75 | -2.37382 |
|         | 0.00022349  | 659.85  | 286.033 | -2.3069  | 0.00101862  | 999.675 | 313.55  | -3.18825 |
|         | 0.000174256 | 1184.63 | 577.3   | -2.05202 |             |         |         |          |
| -2.8747 |             |         |         |          |             |         |         |          |
| -2.7828 |             |         |         |          |             |         |         |          |
| -2.2885 |             |         |         |          |             |         |         |          |
|         | 3.48119E-09 | 7501.45 | 19773.8 | 2.636    | 2.30185E-13 | 4227.4  | 18164.6 | 4.29687  |
|         |             |         |         |          | 6.01821E-05 | #DIV/0! | 1982.3  | #DIV/0!  |
|         |             |         |         |          | 5.50146E-07 | 6581.05 | 13324.6 | 2.02469  |
|         |             |         |         |          | 0.00300911  | 2739.93 | 1126.13 | -2.43306 |

|         |             |         |         |          |             |         |         |          |  |
|---------|-------------|---------|---------|----------|-------------|---------|---------|----------|--|
| 2.55211 |             |         |         |          |             |         |         |          |  |
| -3.823  | 0.000333711 | 1627.45 | 505.375 | -3.22028 |             |         |         |          |  |
|         |             |         |         |          | 0.000867199 | 983.3   | 1981.7  | 2.01536  |  |
|         |             |         |         |          | 3.68404E-09 | #DIV/0! | 2190.5  | #DIV/0!  |  |
|         |             |         |         |          | 3.52507E-07 | 11426.7 | 5058.65 | -2.25884 |  |
| -2.6315 | 2.43595E-05 | 561.35  | #DIV/0! | #DIV/0!  |             |         |         |          |  |
| #DIV/0! |             |         |         |          |             |         |         |          |  |
|         | 0.00571957  | 866.875 | 383.167 | -2.2624  |             |         |         |          |  |
|         |             |         |         |          | 0.00781574  | 956.2   | 294.5   | -3.24686 |  |
|         |             |         |         |          | 0.00912678  | 1287.45 | 497.65  | -2.58706 |  |
|         |             |         |         |          | 6.1782E-07  | 3476.28 | 1647.35 | -2.11022 |  |
|         | 0.000906787 | 1231.75 | 603.575 | -2.04076 |             |         |         |          |  |
|         |             |         |         |          |             |         |         |          |  |
|         | 0.00728702  | 1807.6  | 6578.93 | 3.63959  | 0.0161162   | 2944.8  | 8510.33 | 2.88995  |  |
|         |             |         |         |          | 0.00262884  | 4649.4  | 9533.58 | 2.0505   |  |
|         | 0.0131512   | 12277.1 | 3608.05 | -3.4027  |             |         |         |          |  |
|         | 0.0113153   | 1273.83 | #DIV/0! | #DIV/0!  | 0.00258735  | 2447.68 | 942.6   | -2.59673 |  |
|         |             |         |         |          | 0.00154037  | 877.75  | 401.7   | -2.18509 |  |
|         |             |         |         |          | 0.00035017  | 1154.73 | 171.3   | -6.74095 |  |
|         |             |         |         |          | 0.000889634 | 1074.57 | 309.6   | -3.47082 |  |
|         | 0.000122795 | 1166.5  | #DIV/0! | #DIV/0!  |             |         |         |          |  |
|         | 0.00747248  | 868.175 | 273.625 | -3.17286 | 0.00228338  | 2150.65 | 660.033 | -3.2584  |  |
|         |             |         |         |          | 0.00201837  | 1087.33 | 413.533 | -2.62935 |  |
|         |             |         |         |          | 0.00117205  | 1398.4  | 614.1   | -2.27715 |  |
|         |             |         |         |          | 4.38036E-06 | 1352.7  | 2892.85 | 2.13857  |  |
|         |             |         |         |          | 0.000240431 | 1802.55 | 704.4   | -2.55899 |  |
| -2.7457 |             |         |         |          | 0.000958441 | 891.55  | 424.45  | -2.10048 |  |
|         |             |         |         |          | 1.77412E-08 | 2359.53 | 1048.45 | -2.25049 |  |
| -2.0189 |             |         |         |          |             |         |         |          |  |
|         |             |         |         |          | 5.18057E-07 | #DIV/0! | 3436.18 | #DIV/0!  |  |
|         | 3.92631E-08 | 1757.35 | 826.4   | -2.12651 | 7.75726E-12 | 3009.43 | 1022.53 | -2.94313 |  |
| -2.3706 | 2.86864E-08 | 967.15  | 299.475 | -3.22948 | 2.55782E-08 | 1308.55 | 382.233 | -3.42343 |  |
|         |             |         |         |          | 0.000074167 | 1932.88 | 4285.93 | 2.21738  |  |
|         | 0.000772292 | 17213.2 | 6799.7  | -2.53146 | 0.00234316  | 30275.2 | 14515.8 | -2.08567 |  |
|         | 5.20467E-07 | 36143.2 | 17379.5 | -2.07965 |             |         |         |          |  |
|         |             |         |         |          | 9.87416E-17 | 9810.85 | 27368.5 | 2.78962  |  |
|         |             |         |         |          | 2.04708E-05 | 4777.03 | 9968.68 | 2.0868   |  |
|         |             |         |         |          | 4.59728E-07 | 2463.65 | 7658.73 | 3.10869  |  |
|         |             |         |         |          | 5.34516E-08 | #DIV/0! | 3543.7  | #DIV/0!  |  |
|         | 0.000174632 | 898.733 | 232.1   | -3.87218 | 4.2467E-11  | 2099.93 | #DIV/0! | #DIV/0!  |  |
| 4.57523 | 1.01913E-05 | #DIV/0! | 940.8   | #DIV/0!  |             |         |         |          |  |
|         |             |         |         |          | 8.64057E-05 | 2265.45 | 524.6   | -4.31843 |  |
|         |             |         |         |          | 5.38609E-05 | 1229    | 403.45  | -3.04623 |  |
|         |             |         |         |          | 1.48162E-06 | 2204.23 | 659.25  | -3.34353 |  |
| -3.8998 |             |         |         |          |             |         |         |          |  |
|         |             |         |         |          | 0.0193949   | 1219.25 | 322     | -3.78649 |  |
|         | 6.27238E-05 | 1166.75 | 569.375 | -2.04918 | 1.31925E-05 | 2107.48 | 848.55  | -2.48362 |  |
|         |             |         |         |          | 0.00209042  | 748.325 | 328.2   | -2.28009 |  |
|         |             |         |         |          | 7.66613E-09 | 2131    | 4940.4  | 2.31835  |  |
|         |             |         |         |          | 0.00002197  | #DIV/0! | 2471.03 | #DIV/0!  |  |
| -2.3387 |             |         |         |          |             |         |         |          |  |
|         | 7.86503E-08 | 16899.2 | 43028.2 | 2.54617  | 8.4963E-12  | 11764.5 | 46120.4 | 3.92031  |  |
|         |             |         |         |          | 1.75637E-14 | 19772.5 | 88704.7 | 4.48628  |  |
|         |             |         |         |          | 1.18796E-07 | 5641.48 | 13618.3 | 2.41396  |  |
|         |             |         |         |          | 9.2953E-06  | #DIV/0! | 2075.28 | #DIV/0!  |  |
|         |             |         |         |          | 0.000468563 | #DIV/0! | 2448.08 | #DIV/0!  |  |
|         |             |         |         |          | 4.94231E-12 | 13703.6 | 64720   | 4.72287  |  |
|         |             |         |         |          | 0.00364188  | 839.9   | #DIV/0! | #DIV/0!  |  |
|         |             |         |         |          | 8.93935E-07 | 2313.13 | 5388.05 | 2.32934  |  |
|         |             |         |         |          | 3.84562E-10 | 3812.18 | 9024.6  | 2.36731  |  |
|         |             |         |         |          | 0.00035562  | 1671.03 | 458.325 | -3.64596 |  |
|         | 0.00116625  | 565.95  | 272.4   | -2.07764 |             |         |         |          |  |
|         |             |         |         |          | 5.54052E-05 | 1038.73 | 295.6   | -3.51395 |  |



|         |             |         |         |          |             |         |         |          |
|---------|-------------|---------|---------|----------|-------------|---------|---------|----------|
|         |             |         |         |          | 0.00224802  | 1355.5  | 313.167 | -4.32837 |
|         |             |         |         |          | 0.000321913 | #DIV/0! | 2647.75 | #DIV/0!  |
| #DIV/0! |             |         |         |          | 0.000106664 | 1353.77 | 330.5   | -4.09612 |
|         |             |         |         |          | 0.00189228  | 1089.63 | 387.45  | -2.8123  |
|         |             |         |         |          | 0.00680946  | 1498.43 | 592.9   | -2.52728 |
|         | 0.000512943 | 608.7   | #DIV/0! | #DIV/0!  |             |         |         |          |
|         |             |         |         |          | 0.0078512   | 1461.53 | 416.4   | -3.50993 |
|         |             |         |         |          | 0.00258709  | 1394.43 | #DIV/0! | #DIV/0!  |
|         |             |         |         |          | 0.00965881  | 1329.4  | #DIV/0! | #DIV/0!  |
|         |             |         |         |          | 6.01965E-11 | 10529.4 | 24281.2 | 2.30604  |
|         |             |         |         |          | 0.0073007   | 1502.53 | 490.4   | -3.06389 |
|         |             |         |         |          | 6.90448E-10 | 5779.78 | 20443.4 | 3.53706  |
| 2.12858 | 3.13424E-06 | #DIV/0! | 737.65  | #DIV/0!  |             |         |         |          |
|         | 0.00242227  | 1799.23 | 497.35  | -3.61764 | 0.00197309  | 5291.15 | 961.6   | -5.50244 |
|         |             |         |         |          | 0.00192992  | 3345.4  | 818     | -4.08973 |
|         | 0.0108707   | 2907.37 | 883.967 | -3.289   |             |         |         |          |
|         |             |         |         |          | 0.00180227  | 549.675 | 234.5   | -2.34403 |
| #DIV/0! | 2.36491E-05 | 944.5   | #DIV/0! | #DIV/0!  |             |         |         |          |
|         | 4.28283E-11 | 1016.4  | 2967.98 | 2.92009  |             |         |         |          |
|         |             |         |         |          | 1.76865E-09 | 7687.88 | 20342.7 | 2.64607  |
|         |             |         |         |          | 1.37124E-05 | 5106.43 | 2020.75 | -2.52699 |
|         | 9.99343E-05 | 3544.5  | 1551.05 | -2.28523 | 4.87798E-05 | 3868.4  | 1038.93 | -3.72343 |
|         |             |         |         |          |             |         |         |          |
|         | 0.000153798 | 974.8   | 325.1   | -2.99846 |             |         |         |          |
| -2.6104 |             |         |         |          |             |         |         |          |
|         |             |         |         |          | 9.85518E-06 | 1998.1  | 450.3   | -4.43726 |
|         |             |         |         |          | 1.37823E-05 | 2708.23 | 1028.07 | -2.63429 |
|         |             |         |         |          | 0.000433644 | 1543.77 | #DIV/0! | #DIV/0!  |
|         |             |         |         |          | 8.25231E-05 | 3160.55 | 786.5   | -4.0185  |
| -2.1331 | 0.0010467   | 2491.15 | 1118.45 | -2.22732 |             |         |         |          |
|         | 0.00185768  | 1115    | 555.233 | -2.00816 |             |         |         |          |
| 2.01502 |             |         |         |          |             |         |         |          |
|         | 2.29818E-09 | 1454.55 | 631.225 | -2.30433 | 4.43824E-07 | 1964    | 965.225 | -2.03476 |
| -2.1867 | 2.92776E-06 | 9357.53 | 3115.08 | -3.00395 | 3.92358E-05 | 4479.2  | 1943.05 | -2.30524 |
|         | 7.02005E-07 | 1444.03 | 615.667 | -2.34547 | 1.42366E-08 | 2767.85 | 917.1   | -3.01805 |
| -2.0136 | 6.15398E-09 | 4670.2  | 2203.73 | -2.11923 | 1.12757E-10 | 5131.85 | 2177.05 | -2.35725 |
|         | 4.95403E-10 | 9138.83 | 19811.8 | 2.16787  | 9.33996E-14 | 4958.08 | 13819.1 | 2.78718  |
|         |             |         |         |          | 3.0866E-06  | 820.425 | 2557.65 | 3.11747  |
|         | 1.8633E-08  | 2594.48 | 10740.6 | 4.13979  | 1.02289E-09 | 1829.95 | 5968.4  | 3.26151  |
|         | 2.28703E-06 | 12111.9 | 25287   | 2.08778  | 7.76402E-11 | 4239.73 | 14541.9 | 3.42992  |
|         |             |         |         |          | 3.15886E-15 | 8248.48 | 29607   | 3.58939  |
|         | 0.000278602 | 6138.5  | 12639.4 | 2.05903  | 2.18792E-10 | #DIV/0! | 9994.48 | #DIV/0!  |
| 2.10255 | 1.09774E-07 | 1691.5  | 5789.93 | 3.42295  | 1.99308E-11 | #DIV/0! | 3852.43 | #DIV/0!  |
|         |             |         |         |          | 8.07038E-08 | #DIV/0! | 1724.78 | #DIV/0!  |
|         | 3.37284E-09 | 11914.6 | 40609.8 | 3.40842  | 1.09297E-13 | 6433.35 | 37919.2 | 5.89415  |
|         |             |         |         |          | 0.00190848  | 1457.33 | 434.5   | -3.35403 |
|         | 0.000137428 | 671.25  | 205.2   | -3.2712  | 8.94173E-11 | 1194.6  | #DIV/0! | #DIV/0!  |
|         | 0.0109535   | 618.467 | #DIV/0! | #DIV/0!  |             |         |         |          |
|         |             |         |         |          | 4.11748E-11 | 1684.05 | 484.85  | -3.47334 |
|         | 4.72431E-07 | 10185.8 | 21180.3 | 2.07939  | 9.71931E-11 | 4967.4  | 14729.7 | 2.96527  |
|         |             |         |         |          | 2.73224E-13 | 9080.85 | 23755.4 | 2.61599  |
|         |             |         |         |          | 1.72479E-08 | 7631.78 | 21221.4 | 2.78066  |
|         |             |         |         |          | 9.38034E-07 | 1543.33 | 542.15  | -2.84669 |
| -2.093  | 0.00012034  | 3555.1  | 1774.73 | -2.00317 |             |         |         |          |
| -2.0325 |             |         |         |          |             |         |         |          |
|         |             |         |         |          | 0.000756356 | 2502    | 1243.23 | -2.01249 |
|         |             |         |         |          | 1.19639E-05 | 896.425 | 381.35  | -2.35066 |
|         | 3.64013E-08 | 38673.9 | 80924.7 | 2.09249  | 2.55311E-19 | 16315.7 | 95695.1 | 5.86522  |
|         | 1.01006E-10 | 10021.6 | 26443.3 | 2.63863  | 1.22011E-18 | 4351.03 | 26837.7 | 6.16813  |
| 3.16036 | 2.13093E-09 | 5385.83 | 25405.2 | 4.71704  | 1.65993E-13 | #DIV/0! | 27379.8 | #DIV/0!  |
| 2.73637 | 2.03133E-14 | 7195.85 | 26742.1 | 3.71632  | 3.72905E-12 | 6332    | 17839.9 | 2.81742  |
|         | 7.06176E-11 | 1897.68 | 7182.43 | 3.78486  |             |         |         |          |
|         |             |         |         |          | 3.58729E-11 | 1920.28 | 5747.13 | 2.99287  |

|         |             |         |         |          |             |         |         |          |
|---------|-------------|---------|---------|----------|-------------|---------|---------|----------|
|         |             |         |         |          | 0.0124922   | 729.425 | 301.2   | -2.42173 |
|         |             |         |         |          | 0.0100225   | 1054.4  | 399.95  | -2.63633 |
|         |             |         |         |          | 2.12071E-13 | 4273.13 | 12910   | 3.02121  |
| -2.396  | 0.000109461 | 708.167 | 324.667 | -2.18121 |             |         |         |          |
|         |             |         |         |          | 0.000129339 | 2870.75 | 837.067 | -3.42954 |
|         |             |         |         |          | 1.40275E-05 | 1581.73 | 585.6   | -2.70105 |
|         |             |         |         |          | 0.000485463 | 1631.53 | 653.8   | -2.49546 |
| 3.93109 | 2.34455E-09 | 4700.53 | 12900.9 | 2.74456  | 3.80586E-09 | #DIV/0! | 9214.28 | #DIV/0!  |
|         | 1.33185E-12 | 982.433 | 5365.83 | 5.46177  | 2.32559E-10 | #DIV/0! | 3939.48 | #DIV/0!  |
|         |             |         |         |          | 0.000152425 | #DIV/0! | 2409.23 | #DIV/0!  |
|         |             |         |         |          | 0.00525381  | #DIV/0! | 1288.03 | #DIV/0!  |
| -3.9246 | 2.5083E-06  | 11855.6 | 2989.55 | -3.96568 | 7.51003E-05 | 7521.35 | 2935.13 | -2.56253 |
|         |             |         |         |          | 0.000131507 | 2394.95 | 647.975 | -3.69605 |
|         |             |         |         |          | 0.001711102 | #DIV/0! | 672.133 | #DIV/0!  |
| -2.433  | 2.73872E-06 | 10955.3 | 4097.85 | -2.67342 |             |         |         |          |
|         |             |         |         |          | 0.0121686   | 731.567 | 311.7   | -2.34702 |
|         |             |         |         |          | 1.04944E-05 | 806.567 | 344.875 | -2.33872 |
|         |             |         |         |          | 0.000502904 | 1430.67 | #DIV/0! | #DIV/0!  |
|         |             |         |         |          | 0.00303581  | #DIV/0! | 2741.37 | #DIV/0!  |
|         |             |         |         |          | 3.61333E-14 | 14034.1 | 37587.6 | 2.6783   |
|         |             |         |         |          | 3.85702E-09 | 4075.8  | 11634.3 | 2.85448  |
|         | 5.17071E-05 | 8249.4  | 17218.2 | 2.08721  | 3.27197E-06 | 5123.9  | 12856.3 | 2.50908  |
|         |             |         |         |          | 1.17497E-08 | 4063.93 | 12311.4 | 3.02942  |
|         |             |         |         |          | 3.95948E-06 | 714.8   | 1543.6  | 2.15949  |
|         |             |         |         |          | 1.2435E-13  | 12545.1 | 52739.8 | 4.20403  |
|         | 1.13721E-13 | 15424.6 | 35628.9 | 2.30988  | 1.41547E-23 | 6638.68 | 34903.2 | 5.25756  |
|         | 5.38254E-10 | 9222.55 | 26678.8 | 2.89278  | 3.83936E-19 | 3209.9  | 22391.1 | 6.97562  |
|         |             |         |         |          | 2.89623E-06 | 3796.83 | 1244.18 | -3.05168 |
| 2.52824 | 0.000926791 | 1457.28 | 627.875 | -2.32096 | 0.000256108 | 1700.75 | 634.95  | -2.67856 |
|         | 7.53623E-13 | 4053.55 | 18169.5 | 4.48236  | 1.68213E-13 | 2934.55 | 12807.6 | 4.36442  |
|         | 4.10169E-10 | 8050.58 | 34840.5 | 4.3277   | 2.40292E-12 | 4118.33 | 21436.8 | 5.20522  |
|         | 3.72351E-12 | 21867.3 | 60382.7 | 2.76133  | 1.08431E-19 | 8936.25 | 51515.3 | 5.76475  |
|         | 1.29765E-07 | 4289.45 | 11878.3 | 2.76918  | 1.59119E-10 | 2581.15 | 9730.4  | 3.76979  |
|         |             |         |         |          | 6.40252E-07 | 2058.08 | 4681.43 | 2.27466  |
|         |             |         |         |          | 4.76969E-06 | 2153.75 | 5062.28 | 2.35045  |
| -2.2934 | 7.01824E-08 | 1488.55 | 491     | -3.03167 | 4.31495E-08 | 2070.03 | 457.925 | -4.52045 |
|         |             |         |         |          | 1.70875E-07 | 2407.05 | 832.125 | -2.89265 |
| -2.1636 |             |         |         |          |             |         |         |          |
| 2.19747 | 3.07306E-08 | 2897.35 | 7591.65 | 2.6202   | 3.24487E-11 | 2235.5  | 8081.05 | 3.61487  |
|         | 0.000355597 | 595.433 | 243.6   | -2.44431 |             |         |         |          |
|         |             |         |         |          | 9.84246E-11 | 4762.15 | 13682.4 | 2.87316  |
|         |             |         |         |          | 2.5168E-12  | 15750.7 | 50442.4 | 3.20255  |
|         | 9.70687E-08 | 12143.1 | 24455.2 | 2.01392  |             |         |         |          |
|         |             |         |         |          | 9.31717E-08 | 1960.05 | 557.825 | -3.51374 |
| -2.1246 | 4.75145E-09 | 1417.95 | 427.6   | -3.31607 | 7.05146E-09 | 1965    | 579.225 | -3.39246 |
|         | 0.000846486 | 1327.3  | 480.8   | -2.76061 |             |         |         |          |
|         | 9.02363E-05 | 511.833 | #DIV/0! | #DIV/0!  |             |         |         |          |
|         |             |         |         |          |             |         |         |          |
|         | 0.00744016  | 1508.78 | 654.933 | -2.30371 |             |         |         |          |
| -3.8821 | 0.00231938  | 1633.73 | 749.575 | -2.17954 |             |         |         |          |
|         |             |         |         |          | 2.79806E-06 | 15049.8 | 32113.8 | 2.13384  |
|         |             |         |         |          | 4.65659E-06 | 2277.85 | 5006.05 | 2.19771  |
|         |             |         |         |          | 1.38513E-06 | 2761.18 | 7131.63 | 2.58282  |
|         |             |         |         |          | 1.90695E-05 | 953.1   | #DIV/0! | #DIV/0!  |
|         | 2.42606E-05 | 631.667 | #DIV/0! | #DIV/0!  | 0.000393704 | 995     | 355.833 | -2.79625 |
|         |             |         |         |          | 0.0153831   | 1398.08 | 572.7   | -2.4412  |
|         |             |         |         |          | 7.73241E-07 | 1755.18 | 3591.68 | 2.04633  |
|         |             |         |         |          | 5.9927E-13  | 2722.33 | 12792.8 | 4.69921  |
|         | 1.99477E-06 | 24893.6 | 53794   | 2.16096  | 1.44435E-14 | 10117.4 | 52917.2 | 5.2303   |
|         |             |         |         |          | 5.14837E-07 | 1750.53 | 4246.43 | 2.4258   |
|         |             |         |         |          | 0.000544131 | 8541.65 | 17178.6 | 2.01116  |

|         |             |         |         |          |             |         |         |          |
|---------|-------------|---------|---------|----------|-------------|---------|---------|----------|
|         |             |         |         |          | 0.000559801 | 5220.5  | 10453.4 | 2.00238  |
|         |             |         |         |          | 2.90348E-05 | 3860.05 | 10642.8 | 2.75715  |
|         |             |         |         |          | 3.55175E-06 | #DIV/0! | 2222.25 | #DIV/0!  |
| 7.55848 | 2.91937E-06 | 2218.83 | 35265   | 15.8935  | 4.54348E-09 | 5357.7  | 30894.9 | 5.76645  |
| 6.61735 | 5.16072E-09 | 5667.55 | 69028.9 | 12.1797  | 7.7629E-11  | 7153.7  | 78159.4 | 10.9257  |
|         |             |         |         |          | 1.18073E-06 | 3095.05 | 919.175 | -3.3672  |
|         |             |         |         |          | 4.27259E-07 | 2439.73 | 732     | -3.33296 |
|         | 0.00107333  | 15130.6 | 43358.6 | 2.86562  | 0.000111532 | 9402.98 | 35354.9 | 3.75997  |
| 2.64209 | 3.34057E-12 | 8401.7  | 50544.4 | 6.01598  | 1.23764E-13 | 5736.68 | 33764   | 5.88564  |
| 4.49623 | 1.67369E-09 | 847.6   | 3813.95 | 4.49971  | 0.00171004  | #DIV/0! | 1656.3  | #DIV/0!  |
| 3.79297 | 2.37405E-11 | 1794.78 | 6233.85 | 3.47333  |             |         |         |          |
| 2.66188 |             |         |         |          |             |         |         |          |
|         |             |         |         |          | 0.0033668   | #DIV/0! | 1231.77 | #DIV/0!  |
|         |             |         |         |          | 0.000176246 | 905.75  | 202.6   | -4.47063 |
|         |             |         |         |          | 0.00383841  | 1448.03 | 484.3   | -2.98993 |
|         |             |         |         |          | 6.02114E-06 | 1147.7  | #DIV/0! | #DIV/0!  |
|         | 1.89317E-07 | 1517.1  | 606.1   | -2.50305 | 8.2648E-08  | 1762.95 | 661.9   | -2.66347 |
|         | 8.08857E-11 | 3423.03 | 8186.63 | 2.39163  | 2.49308E-11 | 2447.85 | 5812.2  | 2.37441  |
|         |             |         |         |          | 2.36197E-10 | 6056.38 | 14631   | 2.41579  |
|         |             |         |         |          | 3.18343E-06 | #DIV/0! | 2766.9  | #DIV/0!  |
|         |             |         |         |          | 1.44213E-07 | 1449.5  | 566.725 | -2.55768 |
|         |             |         |         |          | 0.000210597 | 1533.33 | 405.4   | -3.78227 |
|         | 8.62662E-06 | 821.425 | 274.333 | -2.99426 | 4.53476E-05 | 1739.7  | 569.575 | -3.05438 |
|         | 0.000897424 | 1228.13 | 581.25  | -2.1129  | 0.000818969 | 2136.8  | 950.3   | -2.24855 |
|         |             |         |         |          | 0.00012374  | 4934.63 | 13164.2 | 2.66772  |
|         |             |         |         |          | 2.37801E-08 | 6191.9  | 12989.1 | 2.09776  |
|         |             |         |         |          | 8.09309E-14 | 4331.8  | 10011.8 | 2.31123  |
|         |             |         |         |          | 9.58182E-06 | 3291.5  | 7639.85 | 2.32108  |
|         |             |         |         |          | 9.27441E-07 | 3375.25 | 13187.5 | 3.9071   |
|         |             |         |         |          | 5.11516E-07 | #DIV/0! | 2441.05 | #DIV/0!  |
|         |             |         |         |          | 1.45971E-06 | 2534.43 | 6089.03 | 2.40253  |
|         |             |         |         |          | 3.05273E-12 | 6228.7  | 19967   | 3.20565  |
|         | 0.000136561 | 714.3   | 275.35  | -2.59415 |             |         |         |          |
|         | 2.81858E-08 | 3821.88 | 9508.1  | 2.48781  | 8.50753E-07 | 3807.33 | 7919.75 | 2.08014  |
| 2.10958 | 4.38733E-08 | 3051.48 | 7703.5  | 2.52452  | 3.15019E-07 | 3019.73 | 6634.38 | 2.19701  |
|         | 2.8326E-10  | 7063.5  | 24222.3 | 3.42922  | 2.20338E-11 | 4875.53 | 17372.1 | 3.56313  |
|         | 0.0094099   | 946.85  | 299.833 | -3.15792 | 0.000843873 | 1811.48 | 500.667 | -3.61813 |
|         |             |         |         |          | 2.60855E-08 | 3744.68 | 1241.1  | -3.01722 |
|         |             |         |         |          | 6.47118E-08 | 859.65  | 2230.48 | 2.59463  |
|         |             |         |         |          | 6.17633E-07 | #DIV/0! | 1974.73 | #DIV/0!  |
|         |             |         |         |          | 0.00012907  | 1452.93 | 721.975 | -2.01243 |
|         | 0.000860853 | 789.85  | 200.733 | -3.93482 | 0.0012162   | 1815.33 | 535.967 | -3.38701 |
|         | 0.00404748  | 585.1   | #DIV/0! | #DIV/0!  | 0.0101962   | 1419.2  | 503.65  | -2.81783 |
|         | 0.000209309 | 43578.3 | 16637.6 | -2.61927 | 0.000556791 | 82069.4 | 34901.3 | -2.35147 |
|         |             |         |         |          | 0.00455888  | 119465  | 51691.9 | -2.3111  |
| -4.0163 | 4.98452E-07 | 2100.45 | 578.375 | -3.63164 |             |         |         |          |
|         | 1.17315E-05 | 3010.28 | 1329.63 | -2.264   | 1.03886E-11 | 3351.63 | 764.55  | -4.38379 |
|         |             |         |         |          | 3.54018E-15 | 2513.25 | 757.5   | -3.31782 |
|         | 0.00843534  | 1141.73 | #DIV/0! | #DIV/0!  |             |         |         |          |
| -2.1825 | 2.95677E-05 | 3836.15 | 1885.18 | -2.0349  |             |         |         |          |
| #DIV/0! |             |         |         |          | 0.000330241 | #DIV/0! | 4866.78 | #DIV/0!  |
|         |             |         |         |          | 0.0103918   | #DIV/0! | 1599.85 | #DIV/0!  |
|         |             |         |         |          | 3.17783E-07 | 6518.35 | 13467.9 | 2.06614  |
|         | 0.0030509   | 979.225 | 487.8   | -2.00743 | 0.00442053  | 2715.95 | 752.75  | -3.60804 |
| 2.62932 | 9.88844E-07 | 2359.05 | 4934.18 | 2.09159  | 1.83068E-05 | #DIV/0! | 5042.58 | #DIV/0!  |
|         | 0.00471464  | #DIV/0! | 2359.15 | #DIV/0!  |             |         |         |          |
|         | 1.25845E-05 | #DIV/0! | 1105.58 | #DIV/0!  |             |         |         |          |
|         |             |         |         |          | 2.48692E-12 | 7196.83 | 18276   | 2.53945  |
|         |             |         |         |          | 4.68521E-11 | 4339.58 | 1813.8  | -2.39253 |
|         |             |         |         |          | 0.00155673  | #DIV/0! | 3441.07 | #DIV/0!  |
| -2.0102 | 1.17103E-11 | 3792.43 | 1274.78 | -2.97498 | 8.87669E-10 | 3537.15 | 1501.3  | -2.35606 |
| 2.02257 | 5.55267E-08 | 2448.3  | 6421.68 | 2.62291  |             |         |         |          |
|         |             |         |         |          | 0.000846201 | #DIV/0! | 675.733 | #DIV/0!  |





|         |             |         |         |          |             |         |         |          |
|---------|-------------|---------|---------|----------|-------------|---------|---------|----------|
| -4.4738 | 9.71502E-10 | 1083.65 | 312.85  | -3.4638  | 1.55404E-07 | 1433.35 | 449.8   | -3.18664 |
| -3.6798 | 1.45736E-11 | 3293.1  | 614.275 | -5.36095 | 2.38561E-08 | 2424.18 | 806.3   | -3.00654 |
| -2.6257 | 0.000445276 | 4780.55 | 2260.35 | -2.11496 |             |         |         |          |
| 2.46734 | 1.60411E-10 | 5800.68 | 21525.7 | 3.7109   | 4.44051E-12 | 3076.18 | 12391.4 | 4.02819  |
| 2.25022 |             |         |         |          |             |         |         |          |
| 2.13567 | 4.48832E-07 | 2793.58 | 5719.85 | 2.0475   | 2.08251E-11 | 1839.57 | 5043.25 | 2.74154  |
|         | 2.00724E-09 | 7278.88 | 20071.2 | 2.75746  | 2.47993E-12 | 4452.2  | 16389.3 | 3.68116  |
|         |             |         |         |          | 0.0171961   | 2116.2  | 578.1   | -3.66061 |
|         | 6.84336E-09 | 3102.78 | 7984.85 | 2.57345  | 9.65534E-05 | #DIV/0! | 3155.93 | #DIV/0!  |
|         | 0.000232363 | 874.8   | 2781.05 | 3.17907  | 2.95724E-07 | #DIV/0! | 1838.23 | #DIV/0!  |
|         |             |         |         |          | 0.0100233   | 3544.63 | 8472.38 | 2.3902   |
| -2.225  | 5.70411E-05 | 1358.43 | 587.767 | -2.31116 | 7.91106E-08 | 1727.83 | 588.233 | -2.93731 |
|         |             |         |         |          | 9.91749E-07 | 3064.43 | 6671.08 | 2.17694  |
|         |             |         |         |          | 2.00722E-08 | 3974.2  | 8756.18 | 2.20325  |
|         |             |         |         |          | 2.68489E-10 | 2086.6  | 5214.53 | 2.49905  |
| -3.2736 | 1.07339E-06 | 1623.73 | 499.667 | -3.24962 |             |         |         |          |
| -3.1027 | 4.37882E-06 | 8825.38 | 2755    | -3.2034  |             |         |         |          |
| -2.9945 |             |         |         |          |             |         |         |          |
|         | 1.46146E-06 | 1921.23 | 680.8   | -2.82201 | 1.11372E-08 | 4634.28 | 1177.48 | -3.93577 |
|         |             |         |         |          | 0.000113814 | 1588.93 | 750.7   | -2.1166  |
| -3.138  | 1.23354E-09 | 1386.1  | 332.475 | -4.16904 | 1.51801E-10 | 2324.58 | 634.067 | -3.66614 |
| -3.7651 |             |         |         |          |             |         |         |          |
|         | 0.000458964 | 772.425 | 269.3   | -2.86827 | 0.00291971  | 1475.93 | 539.7   | -2.73471 |
|         |             |         |         |          | 3.64046E-08 | 10696.7 | 27158.2 | 2.53894  |
|         |             |         |         |          | 5.54748E-05 | 2326.03 | 802.975 | -2.89676 |
|         | 6.20237E-05 | 9911.73 | 4936.05 | -2.00803 |             |         |         |          |
|         | 0.00377429  | #DIV/0! | 1094.18 | #DIV/0!  |             |         |         |          |
|         | 0.00247601  | 702.7   | 293.067 | -2.39775 | 0.000770491 | 1073.17 | 466.367 | -2.30112 |
|         | 1.41063E-07 | 617.625 | 66.4    | -9.30158 | 0.000405496 | 981.525 | 274.367 | -3.57742 |
|         | 9.6302E-06  | 1459.78 | 472.275 | -3.09094 | 2.96919E-07 | 2037.9  | 476.075 | -4.28063 |
|         | 6.75076E-07 | 604.375 | 177.25  | -3.40973 | 0.000678486 | 1067.1  | 423.7   | -2.51853 |
| -2.0915 |             |         |         |          |             |         |         |          |
|         |             |         |         |          | 0.00476719  | 981.433 | 321.15  | -3.056   |
|         |             |         |         |          | 0.000338444 | 1785.8  | 868.9   | -2.05524 |
|         |             |         |         |          | 7.40785E-06 | 3557.1  | 955.05  | -3.72452 |
|         |             |         |         |          | 0.00107903  | 2631.1  | 6879.43 | 2.61466  |
|         |             |         |         |          | 0.000153664 | 1740.5  | 524.067 | -3.32114 |
|         | 0.0155409   | 596.5   | 233.467 | -2.55497 |             |         |         |          |
|         |             |         |         |          | 0.00140093  | 710.6   | #DIV/0! | #DIV/0!  |
|         |             |         |         |          | 0.0136758   | 2237.28 | 611.067 | -3.66126 |
|         |             |         |         |          | 0.00379489  | 1602.8  | 275.5   | -5.81779 |
|         |             |         |         |          | 0.00471424  | 1837.57 | #DIV/0! | #DIV/0!  |
|         |             |         |         |          | 1.11982E-05 | 1442.93 | 352.6   | -4.09224 |
|         | 0.000708835 | 1945.33 | 839.6   | -2.31697 | 0.000368442 | 3199.23 | 1260.53 | -2.53801 |
|         |             |         |         |          | 0.00703258  | 2440.13 | 947.1   | -2.57643 |
| 3.30385 |             |         |         |          |             |         |         |          |
|         |             |         |         |          | 2.28123E-13 | 10287.2 | 31407.8 | 3.05309  |
|         |             |         |         |          | 6.35546E-13 | 3615.3  | 13605.1 | 3.76319  |
|         |             |         |         |          | 2.0634E-14  | 2768.08 | 11308.4 | 4.08529  |
|         | 0.000230094 | 588.05  | 288.967 | -2.03501 |             |         |         |          |
|         |             |         |         |          | 7.9179E-10  | 43284.6 | 110370  | 2.54986  |
|         |             |         |         |          | 6.61333E-15 | 13846.7 | 55172.4 | 3.98451  |
| -2.3012 |             |         |         |          | 0.000514339 | 3570.03 | 1467.78 | -2.43227 |
|         |             |         |         |          | 1.88661E-06 | 2988.85 | 962.75  | -3.10449 |
|         |             |         |         |          | 0.0081309   | 1058.55 | 394.9   | -2.68055 |
|         | 0.0058795   | 2227.38 | 945.775 | -2.35508 |             |         |         |          |
|         | 0.0128896   | 1767.65 | 833.4   | -2.12101 |             |         |         |          |
|         | 0.000790203 | 676.333 | 1999.65 | 2.9566   |             |         |         |          |
|         | 7.27321E-07 | 27317.5 | 61243.9 | 2.24193  | 2.6184E-09  | 12694.1 | 34530.8 | 2.72022  |
|         |             |         |         |          | 1.1452E-07  | 5194.3  | 14989.4 | 2.88573  |

|         |             |         |         |          |             |         |         |          |
|---------|-------------|---------|---------|----------|-------------|---------|---------|----------|
|         |             |         |         |          | 7.38562E-06 | 2435.55 | 6379.15 | 2.61918  |
|         |             |         |         |          | 0.000425423 | #DIV/0! | 1865.8  | #DIV/0!  |
|         |             |         |         |          | 0.00078413  | #DIV/0! | 2347.17 | #DIV/0!  |
|         | 1.45514E-06 | 1611.65 | 623     | -2.58692 | 4.98673E-05 | 2551.4  | 629.6   | -4.05241 |
|         |             |         |         |          | 0.00568367  | 1589.53 | 708.925 | -2.24217 |
|         |             |         |         |          | 3.66435E-05 | 12785.9 | 30999.5 | 2.42451  |
|         |             |         |         |          | 2.20104E-06 | 4788.43 | 13644.1 | 2.84939  |
|         |             |         |         |          | 0.00256948  | 4897.1  | 1199.4  | -4.08296 |
|         | 0.0141867   | 1116.9  | 200.2   | -5.57892 | 0.000880329 | 2373.08 | 1043.1  | -2.27502 |
|         |             |         |         |          | 0.00130645  | 1509.8  | 695.9   | -2.16956 |
|         | 9.07703E-06 | 1385.9  | 553.1   | -2.5057  |             |         |         |          |
|         | 4.55852E-05 | #DIV/0! | 2786.3  | #DIV/0!  |             |         |         |          |
|         | 0.0007419   | 1399.18 | 440.3   | -3.17778 | 0.000328382 | 2643.03 | 761.475 | -3.47093 |
|         | 3.60224E-16 | 8794.2  | 23782.1 | 2.70429  | 7.50283E-20 | 6169.2  | 21836.4 | 3.53958  |
|         | 0.000456987 | 4916.6  | 13293.7 | 2.70383  | 9.23583E-07 | 2743.35 | 10256.5 | 3.73866  |
| 2.03334 | 4.42064E-17 | 4893.68 | 18670.2 | 3.81517  | 2.57878E-20 | 3486.63 | 18399.9 | 5.27729  |
|         | 1.40246E-05 | 4675.08 | 9745.6  | 2.08459  | 5.73417E-09 | 4174.1  | 13505.5 | 3.23555  |
| -2.0623 | 3.40573E-06 | 1468.48 | 647.625 | -2.26748 | 5.66161E-07 | 1445.45 | 617.3   | -2.34157 |
| -2.2039 | 9.60422E-07 | 1483.7  | 673.1   | -2.20428 | 4.01824E-06 | 1436.95 | 677.275 | -2.12166 |
|         |             |         |         |          | 4.75808E-08 | 2712.38 | 8452.48 | 3.11626  |
|         |             |         |         |          | 8.46678E-14 | 3289.43 | 10262.2 | 3.11975  |
| 5.29364 | 5.0382E-15  | 5132.35 | 33086.4 | 6.44663  | 7.40201E-17 | 4109.33 | 29978.7 | 7.29529  |
|         |             |         |         |          | 0.000262242 | 2432.58 | 542.825 | -4.48132 |
|         |             |         |         |          | 0.00301588  | 1082.3  | #DIV/0! | #DIV/0!  |
| -2.3031 | 0.000084681 | 2563.98 | 973.45  | -2.63391 | 2.16382E-13 | 2886.43 | 16226.9 | 5.6218   |
|         |             |         |         |          | 1.64163E-12 | 806.4   | 5789.5  | 7.17944  |
|         | 1.53722E-05 | 10834.3 | 24259.3 | 2.23913  | 2.67258E-17 | 3688.35 | 33040.8 | 8.95815  |
|         |             |         |         |          | 0.0148632   | 3417.33 | 1253.7  | -2.72579 |
|         |             |         |         |          | 4.23049E-05 | 5256.78 | 799.9   | -6.57179 |
|         | 9.55448E-05 | 2959    | 1152.6  | -2.56724 | 1.704E-08   | 6109.4  | #DIV/0! | #DIV/0!  |
| -3.9383 | 4.08758E-05 | 28197.7 | 4218.38 | -6.68448 |             |         |         |          |
|         | 0.000088666 | 1746.78 | 808.067 | -2.16167 |             |         |         |          |
|         | 0.000188036 | 574.7   | 250.9   | -2.29055 | 1.99563E-07 | 1166.83 | 413.4   | -2.82251 |
|         |             |         |         |          | 2.06753E-07 | 2159.97 | 996.75  | -2.16701 |
|         | 0.000591218 | 526     | 161.4   | -3.25898 |             |         |         |          |
| -2.0586 | 7.13094E-05 | 877.933 | #DIV/0! | #DIV/0!  | 7.40941E-08 | 1537.93 | #DIV/0! | #DIV/0!  |
|         |             |         |         |          | 0.000052621 | 789.85  | 1971.88 | 2.49652  |
|         |             |         |         |          | 3.79181E-13 | 4050.98 | 11916   | 2.94152  |
|         |             |         |         |          | 9.83209E-19 | 4960.4  | 31230.5 | 6.29597  |
|         |             |         |         |          | 1.42059E-14 | 6776.75 | 18590   | 2.7432   |
|         |             |         |         |          | 2.38974E-14 | 3487.55 | 12005.6 | 3.44242  |
|         |             |         |         |          | 1.84184E-07 | #DIV/0! | 1903.63 | #DIV/0!  |
| -2.8126 | 5.51678E-14 | 1463.75 | #DIV/0! | #DIV/0!  | 1.0237E-11  | 1552.58 | #DIV/0! | #DIV/0!  |
|         | 5.00227E-05 | 1040.83 | 300.6   | -3.46249 |             |         |         |          |
|         |             |         |         |          | 3.87202E-21 | 17059.6 | 96364.3 | 5.64869  |
|         |             |         |         |          | 4.41968E-20 | 18605.2 | 118855  | 6.38826  |
|         |             |         |         |          | 3.79923E-06 | 2049.5  | 6479.03 | 3.16127  |
|         |             |         |         |          | 1.66413E-18 | 8869.58 | 39641.8 | 4.46941  |
| -2.1289 | 1.79113E-05 | 5986.45 | 2590.98 | -2.3105  |             |         |         |          |
| -2.1773 |             |         |         |          | 5.38123E-09 | 3085.75 | 6729.88 | 2.18095  |
|         |             |         |         |          | 7.05131E-06 | 780.3   | 2302.3  | 2.95053  |
| -2.5322 | 1.79485E-09 | 3048.3  | 704.667 | -4.32588 | 4.2556E-07  | 3742.48 | 1296.27 | -2.88712 |
|         |             |         |         |          | 0.00840578  | #DIV/0! | 1461.15 | #DIV/0!  |
|         | 0.0138429   | 967.2   | 1983.07 | 2.05032  |             |         |         |          |
|         |             |         |         |          | 1.16634E-16 | 8869.88 | 32957.1 | 3.71562  |
|         |             |         |         |          | 2.43166E-06 | 7294.3  | 3393.1  | -2.14975 |
| -2.0435 | 1.13858E-05 | 849.075 | 322.767 | -2.63062 |             |         |         |          |
|         |             |         |         |          | 0.00230377  | 3874.55 | 752.1   | -5.15164 |

|         |             |         |         |          |             |         |         |          |
|---------|-------------|---------|---------|----------|-------------|---------|---------|----------|
|         |             |         |         |          | 0.00682669  | 1701.58 | 374.625 | -4.54208 |
| 2.01139 | 1.45321E-13 | 7173.73 | 20922.4 | 2.91654  | 1.77282E-17 | 4613.1  | 19087.4 | 4.13765  |
|         |             |         |         |          | 0.000653016 | 2460.68 | 440.633 | -5.58441 |
|         |             |         |         |          | 7.50793E-05 | #DIV/0! | 4419.6  | #DIV/0!  |
|         | 1.87842E-10 | 4416.73 | 10198.5 | 2.30906  | 8.1992E-13  | 2833.78 | 7637.65 | 2.69522  |
|         |             |         |         |          | 0.00142429  | #DIV/0! | 1503.23 | #DIV/0!  |
|         | 0.000017844 | 5046.55 | 1791.87 | -2.81636 | 0.000815941 | 3428.88 | 1496    | -2.29203 |
|         | 2.05871E-05 | 5271.13 | 2066.1  | -2.55124 | 0.000256282 | 3432.73 | 1542.2  | -2.22586 |
|         | 0.00375213  | 8270.2  | 3906.75 | -2.1169  |             |         |         |          |
|         |             |         |         |          | 9.31511E-10 | #DIV/0! | 3750.4  | #DIV/0!  |
|         |             |         |         |          | 7.65425E-06 | #DIV/0! | 1976.88 | #DIV/0!  |
|         |             |         |         |          | 0.00100649  | #DIV/0! | 1263.8  | #DIV/0!  |
| -2.2986 |             |         |         |          | 1.83198E-07 | #DIV/0! | 2513.83 | #DIV/0!  |
|         |             |         |         |          | 0.00878835  | 653     | 265.3   | -2.46136 |
|         |             |         |         |          | 5.86846E-05 | 1210.33 | 497.167 | -2.43445 |
| 6.70908 | 1.05931E-17 | 1416.3  | 12356   | 8.72414  | 1.54425E-19 | 1630.08 | 16288.1 | 9.99222  |
| 8.09051 | 1.48492E-15 | 495.333 | 5175.43 | 10.4484  | 2.64614E-15 | 378     | 5327.1  | 14.0929  |
|         | 6.27316E-06 | 4450.13 | 1890.08 | -2.35447 |             |         |         |          |
|         | 0.000033706 | 3528.7  | 1737.05 | -2.03143 |             |         |         |          |
|         |             |         |         |          | 3.77145E-07 | 1459.18 | 480.3   | -3.03805 |
|         | 0.000834783 | 659.55  | 269.15  | -2.45049 |             |         |         |          |
|         |             |         |         |          | 0.00470595  | 1324.2  | 291.2   | -4.54739 |
|         | 0.000253195 | 967     | #DIV/0! | #DIV/0!  |             |         |         |          |
|         |             |         |         |          | 0.000105741 | 1459.18 | 726.475 | -2.00857 |
|         | 5.06809E-05 | 1647    | 594.25  | -2.77156 |             |         |         |          |
|         | 1.8589E-06  | 3527.7  | 8089.68 | 2.29319  | 4.37012E-06 | 2338.4  | 4823.4  | 2.06269  |
|         |             |         |         |          | 2.32007E-08 | 17373.1 | 39461.7 | 2.27143  |
|         | 3.80727E-09 | 6704.93 | 16124.7 | 2.40491  | 7.44648E-11 | 3138.33 | 8182.7  | 2.60735  |
|         | 2.12039E-07 | 3562    | 7364.78 | 2.0676   |             |         |         |          |
|         | 0.000264692 | 784.1   | #DIV/0! | #DIV/0!  | 5.9698E-06  | 1872.63 | 471.5   | -3.97165 |
|         |             |         |         |          | 0.0217196   | 929.633 | 438.467 | -2.12019 |
|         |             |         |         |          | 4.48267E-07 | 2180.55 | 453.325 | -4.81013 |
|         | 0.00681698  | 731.833 | 221.4   | -3.30548 | 0.000643087 | 2270.8  | #DIV/0! | #DIV/0!  |
|         | 0.000549292 | 1968.98 | 736.325 | -2.67406 | 5.00142E-06 | 5028.1  | 1399.1  | -3.59381 |
|         |             |         |         |          | 0.000312638 | 2188.83 | 281.7   | -7.77006 |
|         |             |         |         |          | 0.00071028  | 771.2   | #DIV/0! | #DIV/0!  |
|         | 0.00967271  | 753.025 | 239.35  | -3.14612 | 0.000681273 | 1460.53 | 403.3   | -3.62144 |
|         |             |         |         |          | 0.0114736   | 779.567 | 284.7   | -2.7382  |
|         |             |         |         |          | 3.72918E-05 | 1209.93 | 499.45  | -2.42251 |
|         |             |         |         |          | 0.000352768 | 1420.8  | 246.6   | -5.76156 |
|         | 0.00273436  | 958.7   | 446.5   | -2.14714 |             |         |         |          |
|         | 0.000299735 | 907.3   | #DIV/0! | #DIV/0!  |             |         |         |          |
|         | 0.000356608 | 29829.5 | 60654.8 | 2.03338  | 1.14509E-11 | 7158.65 | 43721   | 6.10744  |
|         | 0.000152507 | 11853.5 | 31762   | 2.67956  | 6.39314E-11 | 2610.18 | 17349   | 6.64666  |
|         | 8.99132E-06 | 1447.33 | #DIV/0! | #DIV/0!  | 6.09006E-11 | 2668.83 | #DIV/0! | #DIV/0!  |
|         |             |         |         |          | 4.14568E-05 | 1855.1  | 3906.53 | 2.10583  |
| -2.4894 |             |         |         |          |             |         |         |          |
| -2.3813 |             |         |         |          |             |         |         |          |
|         |             |         |         |          | 0.000445864 | #DIV/0! | 943.625 | #DIV/0!  |
|         | 0.000827159 | 3732.15 | 1542.4  | -2.4197  |             |         |         |          |
| -2.1939 | 0.00237533  | 8828.53 | 4203.88 | -2.10009 |             |         |         |          |
|         |             |         |         |          | 0.0021611   | 1644.78 | 648     | -2.53823 |
|         |             |         |         |          | 1.76645E-07 | 1029.37 | 2314.93 | 2.24888  |
| -3.6204 | 3.38515E-06 | 2456.45 | 397.4   | -6.1813  |             |         |         |          |
|         |             |         |         |          | 0.00333969  | 929.175 | 342.6   | -2.71213 |
|         | 2.16978E-06 | 2471.43 | 982     | -2.51673 |             |         |         |          |
|         |             |         |         |          | 0.013082    | 2308.23 | 573.85  | -4.02235 |
| 3.00788 | 4.78716E-06 | 1574.5  | 5295.6  | 3.36335  |             |         |         |          |
|         |             |         |         |          | 0.000754212 | 43397.2 | 13617.4 | -3.18689 |
|         |             |         |         |          | 0.00278645  | 11578.5 | 3695.45 | -3.13317 |
|         |             |         |         |          | 0.00226965  | 41635.5 | 19694.1 | -2.11411 |

|         |             |         |         |          |             |         |         |          |
|---------|-------------|---------|---------|----------|-------------|---------|---------|----------|
|         |             |         |         |          | 0.00260997  | 61583.6 | 29366.4 | -2.09707 |
|         | 0.00149487  | 6503.73 | 2903.83 | -2.23971 |             |         |         |          |
|         |             |         |         |          | 0.0014393   | 3317.4  | 752.775 | -4.40689 |
|         |             |         |         |          | 2.79223E-05 | 4075.83 | 1088.53 | -3.74433 |
|         |             |         |         |          | 0.00686217  | 26924.1 | 10774.1 | -2.49896 |
|         |             |         |         |          | 0.0192738   | 17957.1 | 7548.88 | -2.37878 |
| 2.7752  | 1.05996E-05 | 1057.5  | 3189.88 | 3.01643  |             |         |         |          |
|         | 0.00174501  | 662.033 | 285.433 | -2.3194  |             |         |         |          |
|         |             |         |         |          | 0.00703805  | 3684.73 | 1755.5  | -2.09896 |
|         |             |         |         |          | 0.0213277   | 2235.73 | 762.367 | -2.93262 |
|         |             |         |         |          | 0.000305722 | 3118.95 | 1527.68 | -2.04163 |
|         |             |         |         |          | 6.27961E-12 | 13288.3 | 35387.1 | 2.66303  |
|         |             |         |         |          | 0.00131251  | 1068.7  | 531.125 | -2.01214 |
|         |             |         |         |          | 4.59333E-06 | 1567.28 | 492.6   | -3.18164 |
|         | 0.000690144 | 3492.68 | 1612.88 | -2.1655  |             |         |         |          |
|         |             |         |         |          | 0.00297682  | 22810.5 | 7858.98 | -2.90248 |
|         |             |         |         |          | 0.00301116  | 21380.6 | 9046.6  | -2.36338 |
|         |             |         |         |          | 0.00418986  | 21725.4 | 9954.53 | -2.18246 |
|         |             |         |         |          | 0.00026727  | 19913.5 | 7295.08 | -2.72972 |
|         | 0.000014469 | 4242.98 | 2087.9  | -2.03217 |             |         |         |          |
|         | 0.0110199   | 4717.85 | 1336.48 | -3.53007 |             |         |         |          |
|         |             |         |         |          | 0.000868181 | 48639.3 | 20499   | -2.37277 |
|         |             |         |         |          | 3.08633E-05 | 37719.2 | 16051   | -2.34995 |
|         | 6.62775E-05 | 20805.5 | 8638.48 | -2.40847 |             |         |         |          |
|         | 0.000030821 | 15024.7 | 6742    | -2.22852 |             |         |         |          |
|         | 0.000029771 | 19161.9 | 8338.45 | -2.29802 |             |         |         |          |
|         |             |         |         |          | 1.59808E-05 | 37702.9 | 16821   | -2.24143 |
|         |             |         |         |          | 0.000111351 | 43258.1 | 18653.7 | -2.319   |
|         |             |         |         |          | 0.00421485  | 75696.4 | 36531.9 | -2.07206 |
| -2.7025 | 8.1642E-08  | 1264.53 | 404.1   | -3.12924 |             |         |         |          |
|         |             |         |         |          | 3.12225E-08 | 1445.2  | 530.333 | -2.72508 |
|         |             |         |         |          | 0.00225234  | 55186.5 | 22710.2 | -2.43003 |
|         |             |         |         |          | 0.00628597  | 39872.2 | 17854.2 | -2.23322 |
|         |             |         |         |          | 1.22456E-06 | 3939.38 | 8904.98 | 2.2605   |
| -2.8787 | 4.03276E-10 | 7739.98 | 1770.33 | -4.37206 |             |         |         |          |
| -2.4051 | 2.35912E-08 | 16939.4 | 3400.43 | -4.98155 |             |         |         |          |
|         | 1.29178E-06 | 596.95  | 134.5   | -4.43829 |             |         |         |          |
|         |             |         |         |          | 0.000318602 | 1003.17 | 360.1   | -2.7858  |
|         |             |         |         |          | 1.82017E-09 | 4238.53 | 8938.9  | 2.10896  |
|         |             |         |         |          | 1.41579E-12 | 7035.8  | 36023.3 | 5.12     |
|         | 3.69208E-05 | 18430.8 | 37343.4 | 2.02614  |             |         |         |          |
|         | 1.25397E-07 | 10397.4 | 28486.1 | 2.73974  |             |         |         |          |
| 2.43383 | 3.40839E-13 | 3932.05 | 15215.8 | 3.86967  |             |         |         |          |
| 3.07308 | 7.6773E-14  | 6789.3  | 43097.2 | 6.34781  |             |         |         |          |
|         |             |         |         |          | 2.11768E-16 | 4573.45 | 40850   | 8.93198  |
|         |             |         |         |          | 0.000403482 | 1348    | 411.9   | -3.27264 |
|         |             |         |         |          | 0.0214487   | 1164.78 | 399.4   | -2.91631 |
|         |             |         |         |          | 0.00495259  | 1959.03 | 7266.98 | 3.70949  |
| 2.05433 |             |         |         |          |             |         |         |          |
|         |             |         |         |          | 1.07146E-08 | 2290.53 | 665.925 | -3.43961 |
|         |             |         |         |          | 9.45574E-07 | 2227.45 | 788.3   | -2.82564 |
|         |             |         |         |          | 3.74221E-07 | 2701    | 405.2   | -6.66584 |
|         |             |         |         |          | 5.45485E-09 | 1819.37 | 541.7   | -3.35862 |
|         | 0.00374888  | 1083    | 466.4   | -2.32204 |             |         |         |          |
|         |             |         |         |          | 0.000397923 | 2036.87 | 808.233 | -2.52015 |
|         |             |         |         |          | 0.00124038  | 1069.85 | 358.7   | -2.98258 |
|         |             |         |         |          | 0.00235766  | 2049.53 | 979.1   | -2.09327 |
|         | 0.000300757 | 19406.2 | 2633.93 | -7.36779 |             |         |         |          |
|         | 0.00169148  | 15717.4 | 3178.15 | -4.94544 |             |         |         |          |
|         | 0.000165274 | 3051.63 | 6469.53 | 2.12003  |             |         |         |          |
|         | 1.83486E-05 | 2793.9  | 1248.48 | -2.23785 |             |         |         |          |
|         |             |         |         |          | 9.77522E-08 | 13189.3 | 572.967 | -23.0193 |
|         |             |         |         |          | 8.22264E-06 | 11416.1 | 1130.47 | -10.0986 |
|         |             |         |         |          | 1.00054E-05 | 2672.35 | 6423.9  | 2.40384  |
|         |             |         |         |          | 1.93979E-05 | 2281.78 | 1086.63 | -2.09987 |
|         |             |         |         |          | 3.02908E-07 | 1063.65 | 2333.05 | 2.19344  |
|         | 0.00913276  | 836.8   | 394.967 | -2.11866 |             |         |         |          |
|         | 2.61661E-10 | 12112.2 | 24396.1 | 2.01418  |             |         |         |          |
|         | 1.85572E-06 | 1404.58 | 372.833 | -3.7673  |             |         |         |          |
|         | 1.27511E-05 | 2120.93 | 997.825 | -2.12555 |             |         |         |          |
|         |             |         |         |          | 4.00148E-16 | 7333.58 | 20550   | 2.80218  |
|         |             |         |         |          | 1.07138E-07 | 1950.88 | 582.75  | -3.3477  |
|         |             |         |         |          | 2.58804E-07 | 4459.93 | 9578.78 | 2.14774  |
|         |             |         |         |          | 0.0134149   | #DIV/0! | 604.967 | #DIV/0!  |

|         |             |         |         |          |             |         |         |          |
|---------|-------------|---------|---------|----------|-------------|---------|---------|----------|
|         | 0.01375     | 553.933 | 256.6   | -2.15874 |             |         |         |          |
|         |             |         |         |          | 4.15401E-12 | 7424.3  | 21130.7 | 2.84615  |
| #DIV/0! | 2.14392E-05 | 525.65  | #DIV/0! | #DIV/0!  | 0.00135488  | 1685.7  | 285.25  | -5.90955 |
|         | 0.00382974  | 1523.88 | 563.1   | -2.70622 | 2.25069E-06 | 2550.83 | 722.933 | -3.52844 |
|         |             |         |         |          | 1.51352E-05 | 603.667 | 287.8   | -2.09752 |
|         | 6.94666E-09 | 1954.98 | 5360.13 | 2.74179  | 8.84486E-10 | 1539.35 | 4133.58 | 2.68527  |
|         | 0.000135399 | 1508.4  | 3637.6  | 2.41156  | 1.10288E-06 | #DIV/0! | 2399.88 | #DIV/0!  |
|         | 0.00684869  | 535.567 | 191.3   | -2.79962 |             |         |         |          |
|         | 0.000283426 | 6298.48 | 15508   | 2.46218  |             |         |         |          |
|         | 7.40651E-07 | 1122.93 | 424.65  | -2.64435 | 8.85472E-06 | 1985.7  | 837.475 | -2.37106 |
|         | 2.59876E-09 | 2197.88 | 928.333 | -2.36755 | 1.99922E-10 | 3675.68 | 1359.5  | -2.7037  |
| 2.00394 | 3.3902E-10  | 4967.03 | 38840.9 | 7.81975  | 1.22493E-14 | 2331.58 | 28132   | 12.0656  |
|         |             |         |         |          | 1.04271E-19 | 5574.38 | 29620.3 | 5.31365  |
|         |             |         |         |          | 8.68466E-14 | 6384.13 | 36673.8 | 5.74452  |
|         | 9.05099E-07 | 26837.9 | 61390.7 | 2.28747  | 2.80883E-16 | 9929.53 | 70243.2 | 7.07417  |
|         |             |         |         |          | 0.00112247  | 1198.87 | 248.35  | -4.82733 |
|         |             |         |         |          | 6.3264E-12  | 9639.13 | 42512.3 | 4.41039  |
|         |             |         |         |          | 4.52104E-07 | 36331.1 | 8625.15 | -4.21223 |
|         |             |         |         |          | 6.27411E-08 | 5368.75 | 2090.03 | -2.56874 |
|         |             |         |         |          | 7.76542E-09 | 8379.05 | 2445.35 | -3.42652 |
|         |             |         |         |          | 0.00743531  | 1152.53 | #DIV/0! | #DIV/0!  |
|         |             |         |         |          | 0.00579125  | 3270.63 | 881.875 | -3.70872 |
|         | 2.28963E-05 | 170308  | 79698.6 | -2.1369  | 1.92653E-10 | 292471  | 81235.5 | -3.60029 |
|         | 0.000057769 | 98587.4 | 47417.4 | -2.07914 | 1.73162E-08 | 124042  | 42952.6 | -2.88788 |
|         |             |         |         |          |             |         |         |          |
| -3.5218 | 1.44967E-05 | 1024.6  | 219.6   | -4.66576 | 2.32467E-06 | 952.675 | #DIV/0! | #DIV/0!  |
|         | 1.90602E-07 | 874.25  | 271.6   | -3.21889 | 4.24944E-05 | 1391    | 536.9   | -2.5908  |
|         | 0.000884876 | 746.75  | 240.425 | -3.10596 | 0.000866234 | 1570.48 | 390.025 | -4.0266  |
|         |             |         |         |          | 5.93235E-10 | 1584.08 | 579     | -2.73588 |
|         |             |         |         |          | 1.72733E-06 | 1353.85 | 551.175 | -2.4563  |
| 2.07331 | 0.000295254 | 3187.93 | 6611.58 | 2.07394  | 5.57642E-05 | 3245.48 | 6769.6  | 2.08586  |
|         | 0.000164712 | 1240.48 | 584.7   | -2.12156 |             |         |         |          |
|         | 0.000175926 | 1255.6  | 2909.9  | 2.31754  | 1.33924E-07 | #DIV/0! | 2603.25 | #DIV/0!  |
|         |             |         |         |          | 1.41067E-06 | 2639.48 | 679.267 | -3.88577 |
|         |             |         |         |          | 8.03675E-05 | 2313.68 | 473.825 | -4.88297 |
|         |             |         |         |          | 3.92965E-07 | 2980.4  | 7014.13 | 2.35342  |
|         |             |         |         |          | 0.00242149  | #DIV/0! | 3026.95 | #DIV/0!  |
|         | 0.00786389  | #DIV/0! | 795.767 | #DIV/0!  |             |         |         |          |
|         | 1.64972E-09 | 12698.5 | 2453.73 | -5.17517 | 2.29444E-10 | 6873.28 | 1340.73 | -5.12654 |
| -2.0874 | 4.17876E-08 | 5222.6  | 1565.95 | -3.3351  | 1.19353E-08 | 3249.78 | 1007    | -3.22718 |
|         | 4.54869E-08 | 9804.6  | 2159.4  | -4.54043 | 2.39026E-11 | 7778    | 1060.65 | -7.33324 |
| -2.3521 | 1.92337E-09 | 3972.43 | 688.725 | -5.7678  | 5.18068E-11 | 2748.58 | 455.2   | -6.03817 |
| -2.5859 | 0.000127705 | 3339.48 | 850.167 | -3.92802 | 9.51797E-06 | 2445.25 | 591.5   | -4.13398 |
|         | 0.000159582 | 1727.98 | #DIV/0! | #DIV/0!  |             |         |         |          |
|         | 0.000326459 | 662.8   | #DIV/0! | #DIV/0!  |             |         |         |          |
|         | 2.65081E-05 | 998.55  | 371.85  | -2.68536 | 2.35611E-05 | 1615.68 | 542.575 | -2.97779 |
|         | 9.05414E-07 | 25211.7 | 57338.3 | 2.27427  | 4.55784E-09 | 18331.5 | 50986   | 2.78133  |
|         | 6.63407E-09 | 9869.68 | 36020   | 3.64957  | 5.54347E-09 | 7548.08 | 26128.2 | 3.46157  |
|         |             |         |         |          | 2.43598E-07 | 1803.95 | 4231.3  | 2.34557  |
|         |             |         |         |          | 3.76563E-14 | 8819.35 | 24700.5 | 2.80071  |
| 5.61255 | 9.40897E-13 | 710.767 | 6171.88 | 8.68341  | 1.81084E-12 | 720.1   | 5929.63 | 8.23445  |
|         | 1.98228E-05 | #DIV/0! | 983.767 | #DIV/0!  |             |         |         |          |
|         |             |         |         |          | 1.23444E-14 | 4255.65 | 11931.5 | 2.80368  |
|         |             |         |         |          | 0.000851412 | 5530.03 | 11469.3 | 2.074    |
|         | 3.47835E-08 | 2252.13 | 6578.2  | 2.92089  | 9.48086E-11 | 1845.75 | 6407.33 | 3.47139  |
|         |             |         |         |          | 0.00950073  | #DIV/0! | 799.267 | #DIV/0!  |
| 4.13549 | 2.34748E-09 | 1072.68 | 4082.4  | 3.80581  | 5.31195E-08 | 1334.85 | 3908.48 | 2.92803  |
| 3.12237 | 9.8752E-11  | 1710.15 | 7748.7  | 4.53101  | 5.03854E-13 | 1644.6  | 6727.85 | 4.09087  |
| 2.09496 |             |         |         |          |             |         |         |          |
|         | 6.45171E-07 | 3840.95 | 1757.95 | -2.1849  |             |         |         |          |
|         | 0.000872288 | 1285.97 | 576.3   | -2.23142 |             |         |         |          |

|         |             |         |         |             |             |         |         |          |
|---------|-------------|---------|---------|-------------|-------------|---------|---------|----------|
|         |             |         |         | 2.82048E-06 | 49507.1     | 115069  | 2.3243  |          |
|         |             |         |         | 1.50962E-09 | 19814.6     | 72760.4 | 3.67206 |          |
|         | 0.000382195 | 1363.98 | 3859.13 | 2.82932     | 0.000101442 | 1460.55 | 4140.55 | 2.83493  |
|         |             |         |         |             | 0.0046939   | 3323.8  | 809.75  | -4.10472 |
| -2.6895 |             |         |         |             | 0.000455047 | #DIV/0! | 2775.58 | #DIV/0!  |
|         |             |         |         |             | 0.0161663   | #DIV/0! | 1668.4  | #DIV/0!  |
|         |             |         |         |             | 3.59461E-05 | 1251.73 | 2553.83 | 2.04024  |
|         | 1.08158E-09 | 3640.85 | 8729.83 | 2.39774     | 4.56927E-12 | 1936.17 | 5066.28 | 2.61665  |
|         |             |         |         |             | 0.000134353 | #DIV/0! | 1073.85 | #DIV/0!  |
|         |             |         |         |             | 1.11594E-05 | #DIV/0! | 1430.85 | #DIV/0!  |
|         |             |         |         |             | 5.08068E-09 | #DIV/0! | 3227.08 | #DIV/0!  |
|         |             |         |         |             | 1.42956E-11 | 2190.75 | 777.675 | -2.81705 |
|         | 0.000747239 | 1906.45 | 834.4   | -2.28482    | 0.000102364 | 2741.6  | 1110.58 | -2.46863 |
|         | 0.0074958   | 583.325 | #DIV/0! | #DIV/0!     | 0.000845568 | 1221.7  | 578.075 | -2.11339 |
|         |             |         |         |             | 8.84763E-07 | 2546.53 | 1254.38 | -2.03011 |
|         |             |         |         |             | 5.80283E-06 | #DIV/0! | 1694.1  | #DIV/0!  |
|         |             |         |         |             | 9.16666E-08 | 981     | 2251.3  | 2.2949   |
| -2.746  |             |         |         |             |             |         |         |          |
|         | 0.000448886 | 796.35  | 347.675 | -2.2905     |             |         |         |          |
|         | 5.13919E-07 | 1492.73 | 336.975 | -4.42978    | 5.09556E-05 | 1378.5  | 467.775 | -2.94693 |
|         | 5.47997E-06 | 851.175 | 311.825 | -2.72966    | 1.02004E-06 | 1061.48 | 386.067 | -2.74946 |
|         | 7.66597E-05 | 1179.9  | 383.3   | -3.07827    | 0.000146732 | 1460.53 | #DIV/0! | #DIV/0!  |
|         | 4.36263E-05 | 3138.9  | 7951.38 | 2.53317     | 7.60714E-06 | 1764.78 | 4404.38 | 2.49571  |
|         | 1.17284E-06 | 1796.55 | 4701.33 | 2.61686     |             |         |         |          |
|         | 0.002913    | 474.4   | 2140.78 | 4.51259     | 0.00159401  | 1093.7  | 3916.6  | 3.58106  |
|         |             |         |         |             | 0.00016267  | 14743.4 | 4615.25 | -3.19449 |
|         |             |         |         |             | 2.14983E-09 | 3748.38 | 861.4   | -4.35149 |
|         | 3.51858E-05 | 6076.58 | 2896.13 | -2.09817    |             |         |         |          |
|         |             |         |         |             | 0.00162464  | #DIV/0! | 1160.63 | #DIV/0!  |
|         |             |         |         |             | 0.00934208  | 1194.8  | 335.55  | -3.56072 |
|         |             |         |         |             | 0.000798802 | #DIV/0! | 4731.17 | #DIV/0!  |
|         | 1.39471E-05 | 3799.18 | 1487    | -2.55493    | 2.72698E-05 | 2324.1  | 1033.88 | -2.24795 |
|         | 1.92246E-05 | 15440.7 | 6288.75 | -2.45529    | 1.03806E-05 | 8008.03 | 3444.78 | -2.32469 |
| -3.1031 | 4.44414E-11 | 3523.9  | 695.35  | -5.06781    | 1.40289E-11 | 4734.63 | 954.4   | -4.96084 |
| -2.4265 | 1.83382E-09 | 2537.43 | 585.025 | -4.33729    | 7.02421E-11 | 3857.55 | 853.367 | -4.52039 |
| -2.3733 | 7.6676E-06  | 1639.8  | 624.8   | -2.62452    | 3.60761E-07 | 2416.58 | 836.825 | -2.88779 |
| -3.2085 | 5.97528E-05 | 1360    | 571.2   | -2.38095    |             |         |         |          |
|         | 0.00440763  | 1027.78 | 430.167 | -2.38925    | 4.41097E-05 | 1796.23 | 650.433 | -2.76158 |
|         |             |         |         |             | 7.69843E-12 | 5393.15 | 12365.5 | 2.29282  |
|         |             |         |         |             | 1.30027E-05 | 1487.23 | 3048.33 | 2.04967  |
|         |             |         |         |             | 1.57946E-14 | #DIV/0! | 2331.03 | #DIV/0!  |
|         |             |         |         |             | 2.60374E-05 | 2304.33 | 866.225 | -2.66019 |
| -7.2453 | 2.47573E-07 | 1670.68 | 450.533 | -3.70822    | 5.44383E-05 | 1471.95 | 427.7   | -3.44155 |
| -16.804 | 9.92373E-09 | 6376.03 | 461.9   | -13.8039    |             |         |         |          |
| -15.66  | 2.19635E-09 | 7893.63 | 639     | -12.3531    |             |         |         |          |
|         |             |         |         |             | 9.10151E-07 | 76354.4 | 182362  | 2.38836  |
|         |             |         |         |             | 4.47725E-09 | 3164.3  | 6799.5  | 2.14882  |
|         | 0.00294584  | 645     | #DIV/0! | #DIV/0!     | 4.38591E-06 | 1341.47 | 374.5   | -3.58202 |
|         | 3.95781E-05 | 1050.6  | 410.6   | -2.55869    |             |         |         |          |
|         |             |         |         |             | 0.00130113  | #DIV/0! | 3826.93 | #DIV/0!  |
|         |             |         |         |             | 1.74933E-05 | 2148.65 | 4610.75 | 2.14588  |
|         |             |         |         |             | 1.57085E-05 | 2224.5  | 4794.55 | 2.15534  |
|         |             |         |         |             | 6.41556E-07 | 6119.88 | 15754.4 | 2.57429  |
|         |             |         |         |             | 5.00792E-07 | 2920.95 | 7379.98 | 2.52657  |
|         | 0.00187632  | 677.9   | 306.5   | -2.21175    |             |         |         |          |
|         |             |         |         |             | 1.53485E-15 | 6447.6  | 14789.1 | 2.29373  |
|         |             |         |         |             | 1.70227E-06 | 2823.6  | 6315.65 | 2.23674  |
|         |             |         |         |             | 3.68876E-08 | 19041.2 | 49609.9 | 2.60539  |
|         |             |         |         |             | 2.37819E-10 | 10597.5 | 38903.3 | 3.67099  |
|         |             |         |         |             | 1.17581E-10 | 11329.3 | 44745.2 | 3.94951  |
|         |             |         |         |             | 1.48666E-13 | 3511.75 | 9073.43 | 2.58373  |
|         |             |         |         |             | 0.00467907  | 1325.6  | 505.367 | -2.62305 |
|         |             |         |         |             | 0.0103733   | 1709.08 | 800.375 | -2.13534 |

|         |             |         |         |          |             |         |         |          |
|---------|-------------|---------|---------|----------|-------------|---------|---------|----------|
|         | 7.37663E-10 | 4865.68 | 12789.6 | 2.62853  | 2.96412E-11 | 4180.3  | 12247.2 | 2.92974  |
|         |             |         |         |          | 2.04485E-07 | 2200.48 | 7392.9  | 3.35968  |
|         | 7.49047E-05 | 2443.2  | 5770.9  | 2.36203  |             |         |         |          |
| 6.2317  | 1.40444E-14 | 2152.08 | 16940.5 | 7.87168  | 1.64744E-13 | 2437.15 | 13729.7 | 5.63351  |
| 15.1678 | 4.76433E-13 | 1026.97 | 16142   | 15.7181  | 1.74545E-13 | 1701    | 14940   | 8.78308  |
| 9.47959 | 1.53441E-13 | 374.967 | 2824    | 7.53134  |             |         |         |          |
|         |             |         |         |          | 2.70125E-15 | 3921.15 | 16196.4 | 4.13051  |
|         |             |         |         |          | 3.41941E-09 | 3628.05 | 8716.78 | 2.40261  |
|         |             |         |         |          | 1.14354E-07 | 1125.5  | 5381.9  | 4.78179  |
| 3.07851 | 1.32984E-08 | 3057.48 | 13896.8 | 4.54519  | 8.64508E-07 | 2429.98 | 7525.05 | 3.09676  |
|         |             |         |         |          | 1.47134E-07 | #DIV/0! | 10533   | #DIV/0!  |
|         |             |         |         |          | 4.63216E-07 | #DIV/0! | 11536.5 | #DIV/0!  |
|         |             |         |         |          | 1.79237E-06 | #DIV/0! | 1499.43 | #DIV/0!  |
|         |             |         |         |          | 2.79936E-13 | 6691.03 | 28466.6 | 4.25445  |
| 2.87415 | 1.64842E-05 | 2090.03 | 6328.98 | 3.02818  | 6.36131E-08 | 2814.5  | 10301.9 | 3.66029  |
|         |             |         |         |          | 9.03672E-08 | 5823.5  | 12822.9 | 2.20192  |
|         | 1.23789E-08 | 997.375 | 286.967 | -3.47558 |             |         |         |          |
|         |             |         |         |          | 2.14895E-08 | 6989.05 | 15163.7 | 2.16964  |
|         |             |         |         |          | 1.18785E-06 | #DIV/0! | 2920.95 | #DIV/0!  |
|         | 5.68882E-08 | 15373.6 | 37536.5 | 2.44162  | 2.65648E-15 | 8649    | 49959.1 | 5.77628  |
| -2.3487 |             |         |         |          | 7.4938E-16  | 21749.1 | 2311    | -9.41113 |
|         |             |         |         |          | 0.00806553  | #DIV/0! | 1528.5  | #DIV/0!  |
| -3.1085 | 9.59236E-05 | 6359.3  | 2178.38 | -2.91929 |             |         |         |          |
| -3.0039 | 1.28107E-05 | 15807.1 | 5788.73 | -2.73067 |             |         |         |          |
|         | 1.17363E-06 | 7477.2  | 15544.3 | 2.07889  |             |         |         |          |
| -3.237  | 4.75936E-10 | 1536.9  | 224.5   | -6.84588 | 8.62277E-06 | 1699    | 490.8   | -3.4617  |
|         | 0.000223834 | 736.3   | 213.3   | -3.45195 | 3.71862E-05 | 1442.15 | 487.333 | -2.95927 |
|         |             |         |         |          | 0.0113481   | 1079.67 | 288.7   | -3.73975 |
|         |             |         |         |          | 1.28961E-07 | 1149.55 | 4854.75 | 4.22317  |
|         |             |         |         |          | 0.0199269   | #DIV/0! | 1913.93 | #DIV/0!  |
| -4.3366 | 1.9337E-06  | 1702.35 | 468.825 | -3.6311  | 5.29084E-08 | 3218.05 | 660.625 | -4.87122 |
| -2.4842 | 4.57157E-06 | 6791.63 | 1900.63 | -3.57336 | 8.89718E-07 | 4340.68 | 1260.23 | -3.44437 |
|         |             |         |         |          |             |         |         |          |
|         | 1.25589E-05 | 1049.35 | 364.85  | -2.87611 | 1.26895E-06 | 1986.08 | 572.45  | -3.46943 |
|         | 0.000031389 | 36380.2 | 15825.9 | -2.29878 |             |         |         |          |
|         |             |         |         |          | 1.96844E-05 | 1314.1  | 590.05  | -2.2271  |
|         | 0.000475649 | 1690.85 | 821.833 | -2.05741 |             |         |         |          |
|         | 8.80555E-05 | 1947.98 | 822.55  | -2.36821 | 0.000253208 | 2922.53 | 1355.9  | -2.15542 |
|         | 1.27079E-05 | 773.825 | 264.867 | -2.92156 |             |         |         |          |
|         | 6.69757E-06 | 940     | 438.3   | -2.14465 |             |         |         |          |
|         | 2.02924E-06 | 1868.1  | 591.233 | -3.15967 | 1.98574E-05 | 1856.4  | 909.333 | -2.0415  |
|         |             |         |         |          | 3.16811E-09 | 13405.1 | 30015.8 | 2.23913  |
|         |             |         |         |          | 2.99347E-09 | 11361.3 | 28262   | 2.48757  |
|         | 0.0135721   | 551.767 | #DIV/0! | #DIV/0!  |             |         |         |          |
|         |             |         |         |          | 6.2121E-10  | 14871.6 | 43648.9 | 2.93505  |
|         | 6.46171E-06 | 7244.25 | 16586.6 | 2.28962  | 5.56084E-10 | 3240.63 | 10713   | 3.30584  |
|         |             |         |         |          | 2.07303E-08 | 5642.6  | 18809.3 | 3.33344  |
|         |             |         |         |          | 3.00128E-08 | 5751.33 | 19383.5 | 3.37026  |
|         |             |         |         |          | 5.65484E-11 | 5922.4  | 20561.8 | 3.47187  |
|         |             |         |         |          | 0.000170223 | 1271.7  | 538.75  | -2.36046 |
|         |             |         |         |          | 1.70591E-07 | 5167.18 | 12290.9 | 2.37864  |
|         | 1.88664E-08 | 23199.9 | 56962.2 | 2.45528  | 1.04251E-15 | 13044.6 | 71937.4 | 5.51473  |
| 2.17071 | 3.19098E-06 | 7723.6  | 19497.5 | 2.5244   | 3.36567E-05 | 8331.85 | 17019.5 | 2.04271  |
|         |             |         |         |          | 0.00541643  | 1809.38 | 448.1   | -4.03788 |
| 2.38656 |             |         |         |          |             |         |         |          |
| 3.66315 |             |         |         |          |             |         |         |          |
|         | 5.06078E-08 | #DIV/0! | 3635.05 | #DIV/0!  | 5.62322E-14 | #DIV/0! | 6768.9  | #DIV/0!  |
|         |             |         |         |          | 0.00864397  | 3724.87 | 814.625 | -4.57249 |
| 3.09058 |             |         |         |          | 0.000132201 | 1265.6  | #DIV/0! | #DIV/0!  |
| 4.81038 |             |         |         |          |             |         |         |          |
| #DIV/0! | 1.4442E-06  | #DIV/0! | 2860.18 | #DIV/0!  | 1.70482E-05 | #DIV/0! | 1887.95 | #DIV/0!  |
| #DIV/0! | 4.0032E-09  | #DIV/0! | 6604.93 | #DIV/0!  | 5.36182E-06 | #DIV/0! | 3469.45 | #DIV/0!  |
|         |             |         |         |          | 2.44569E-05 | 1845.55 | 659.4   | -2.79883 |

|         |             |         |         |          |             |         |         |          |
|---------|-------------|---------|---------|----------|-------------|---------|---------|----------|
|         | 7.16202E-06 | 1923.58 | 575.975 | -3.33968 | 1.96624E-09 | 2399.8  | #DIV/0! | #DIV/0!  |
| 2.26642 |             |         |         |          | 0.000145979 | 1995.6  | 4517.78 | 2.26387  |
| 3.09537 | 4.97184E-11 | 4057.75 | 14960.9 | 3.68699  | 3.72598E-11 | 3912.73 | 13668.5 | 3.49335  |
| 2.73336 | 3.03243E-16 | 2620.85 | 11894.4 | 4.53838  | 1.24303E-15 | 2134.13 | 8382.5  | 3.92784  |
| 2.21636 |             |         |         |          |             |         |         |          |
|         |             |         |         |          | 0.00177142  | 1285.03 | #DIV/0! | #DIV/0!  |
|         |             |         |         |          | 0.00275005  | 1043.97 | 402.7   | -2.59242 |
| -2.0011 |             |         |         |          |             |         |         |          |
|         | 0.000363731 | 1792.13 | 4377.88 | 2.44284  | 4.66253E-08 | 1367.9  | 3702.05 | 2.70637  |
|         |             |         |         |          | 1.62445E-11 | 3364.88 | 11380.7 | 3.38221  |
|         | 0.0119753   | 787.25  | 2322.28 | 2.94986  | 2.24092E-07 | #DIV/0! | 5111.53 | #DIV/0!  |
|         |             |         |         |          | 6.25772E-07 | #DIV/0! | 1943.15 | #DIV/0!  |
|         |             |         |         |          | 0.000102526 | 1734    | 531.5   | -3.26246 |
|         |             |         |         |          | 1.56669E-12 | 7488.68 | 23767.7 | 3.17382  |
|         | 1.65829E-08 | 2624.5  | 6876.7  | 2.62019  | 1.05996E-12 | 1535.65 | 5728.35 | 3.73024  |
|         | 2.20618E-10 | 12179.5 | 30389.6 | 2.49514  | 1.25363E-17 | 5604.85 | 26169.8 | 4.66913  |
|         |             |         |         |          | 1.31114E-09 | #DIV/0! | 1194.2  | #DIV/0!  |
|         | 0.00358163  | 2076.4  | 856.925 | -2.42308 | 0.00167959  | 1899.43 | 690.25  | -2.75179 |
|         |             |         |         |          | 5.91896E-12 | 24699.5 | 50137.7 | 2.02991  |
|         |             |         |         |          | 8.78374E-06 | 6203.98 | 13470.9 | 2.17134  |
|         |             |         |         |          | 2.6777E-08  | 6186.43 | 16204.9 | 2.61943  |
|         |             |         |         |          | 1.01775E-12 | 6651.55 | 20238.5 | 3.04268  |
|         |             |         |         |          | 4.78588E-06 | 1950.95 | 798.675 | -2.44273 |
|         |             |         |         |          | 3.26723E-15 | 1814.55 | 8903.08 | 4.90649  |
|         |             |         |         |          | 7.05959E-11 | 3712.73 | 12163.4 | 3.27613  |
|         |             |         |         |          | 3.75822E-05 | 1583.35 | 598.375 | -2.64608 |
|         |             |         |         |          | 2.40348E-08 | 2073.93 | 981.475 | -2.11307 |
|         | 0.00881575  | 1054.8  | 478.1   | -2.20623 |             |         |         |          |
|         | 2.44316E-06 | 1786.93 | 884.075 | -2.02124 |             |         |         |          |
| -2.994  | 2.96616E-07 | 1082.38 | 340.15  | -3.18205 | 3.3009E-07  | 1193.75 | 351.1   | -3.40003 |
|         |             |         |         |          | 6.71883E-07 | 2537.3  | 1121.43 | -2.26257 |
|         |             |         |         |          | 4.35077E-05 | 2605.65 | 533.333 | -4.88559 |
|         |             |         |         |          | 3.21911E-10 | 9358.4  | 3465.85 | -2.70017 |
|         |             |         |         |          | 4.90894E-08 | 3663.78 | 1392.2  | -2.63164 |
| -2.3459 |             |         |         |          |             |         |         |          |
|         |             |         |         |          | 3.90903E-08 | #DIV/0! | 1639.3  | #DIV/0!  |
|         |             |         |         |          | 3.91839E-13 | 12077.3 | 29498.1 | 2.44244  |
|         |             |         |         |          | 1.11955E-05 | #DIV/0! | 2332.13 | #DIV/0!  |
|         | 0.000452632 | 1964.03 | 864.975 | -2.27062 | 1.56819E-07 | 4162.8  | 1022.05 | -4.07299 |
|         |             |         |         |          | 6.10245E-07 | 1602.68 | #DIV/0! | #DIV/0!  |
|         |             |         |         |          | 2.70093E-07 | 8739.83 | 20649.2 | 2.36265  |
|         | 0.000193472 | 2022.18 | 4869    | 2.4078   | 0.00020207  | 1319.58 | 2813.53 | 2.13214  |
| 3.39073 | 1.271E-11   | 7126.08 | 30489.2 | 4.27853  | 5.89604E-10 | 6134.3  | 19180.3 | 3.12673  |
| 4.15551 | 7.10649E-13 | 4144.38 | 21261.7 | 5.13025  | 2.03085E-10 | 4060.5  | 13983.6 | 3.44382  |
| 2.47535 | 1.77285E-09 | 1735.78 | 5639.9  | 3.24921  |             |         |         |          |
|         | 1.13615E-09 | 9670.48 | 22493.9 | 2.32603  | 1.24471E-12 | 6130.1  | 17772.9 | 2.89929  |
|         | 0.00297117  | 516.967 | 1060.23 | 2.05086  |             |         |         |          |
|         | 1.94136E-08 | 1122.2  | 421.125 | -2.66477 | 1.92606E-08 | 1745.48 | 688.625 | -2.53472 |
|         |             |         |         |          | 0.000166945 | #DIV/0! | 1333.93 | #DIV/0!  |
|         |             |         |         |          | 3.95657E-09 | 6226.8  | 15178.5 | 2.4376   |
|         |             |         |         |          | 5.87023E-13 | 8684.68 | 23994.3 | 2.76283  |
|         |             |         |         |          |             |         |         |          |
|         |             |         |         |          | 0.000078649 | 4533.63 | 1885.2  | -2.40485 |
|         | 0.00826541  | 1449.1  | 3031.18 | 2.09176  | 0.000024474 | #DIV/0! | 4065.65 | #DIV/0!  |
|         | 0.00308046  | 1226.7  | 2839.98 | 2.31513  | 2.58772E-06 | #DIV/0! | 3695.65 | #DIV/0!  |
|         | 0.00106094  | 920.825 | 211.2   | -4.35997 | 5.75947E-05 | 1832.9  | 656.2   | -2.7932  |
|         |             |         |         |          | 0.000159204 | 877.175 | 372.2   | -2.35673 |
|         |             |         |         |          | 2.73078E-19 | 17917.5 | 84734.2 | 4.72913  |
|         |             |         |         |          | 2.85275E-06 | #DIV/0! | 1575.33 | #DIV/0!  |
|         |             |         |         |          | 0.00496065  | 3277.58 | #DIV/0! | #DIV/0!  |
|         |             |         |         |          | 4.65884E-05 | 5704.83 | 1329.88 | -4.28975 |



|         |             |         |         |          |             |         |         |          |
|---------|-------------|---------|---------|----------|-------------|---------|---------|----------|
|         |             |         |         |          | 1.60053E-05 | 1534.55 | 527.15  | -2.91103 |
|         | 2.6877E-09  | 2324.18 | 1117.88 | -2.0791  |             |         |         |          |
| -3.4946 |             |         |         |          |             |         |         |          |
| -2.236  |             |         |         |          |             |         |         |          |
| #DIV/0! | 6.18026E-05 | #DIV/0! | 1125.35 | #DIV/0!  |             |         |         |          |
|         | 8.2136E-06  | 3291.43 | 11343.9 | 3.44649  | 1.00009E-09 | 2026.55 | 13268.2 | 6.54716  |
|         | 0.0135006   | #DIV/0! | 2893.9  | #DIV/0!  | 1.02225E-08 | #DIV/0! | 2554.28 | #DIV/0!  |
|         | 0.00100741  | 1058.53 | 499.175 | -2.12057 |             |         |         |          |
|         | 2.72414E-05 | 1047.68 | 3441.6  | 3.28499  | 2.8615E-06  | 693.25  | 2921.7  | 4.2145   |
|         | 4.2769E-06  | 11990.1 | 31346.3 | 2.61434  | 1.10354E-12 | 4309.35 | 32765.4 | 7.60332  |
|         | 5.61981E-05 | 1301.38 | 630.6   | -2.06371 |             |         |         |          |
|         |             |         |         |          | 7.67388E-05 | 4681.48 | 2175.4  | -2.15201 |
|         |             |         |         |          | 0.00330003  | 1908.9  | 684.9   | -2.78712 |
|         | 1.55354E-05 | 1723.03 | 624.95  | -2.75706 | 3.99609E-10 | 4496.15 | 958.9   | -4.68886 |
| #DIV/0! |             |         |         |          |             |         |         |          |
|         |             |         |         |          | 0.0038943   | 1544.35 | 523.45  | -2.95033 |
|         |             |         |         |          | 0.000261314 | 1070.3  | #DIV/0! | #DIV/0!  |
|         |             |         |         |          | 0.000260557 | #DIV/0! | 684.667 | #DIV/0!  |
|         | 5.92871E-09 | 20745.1 | 8824    | -2.35098 |             |         |         |          |
|         | 2.93268E-10 | 2592.65 | 7479.68 | 2.88495  | 9.59979E-09 | 2159.75 | 4680.05 | 2.16694  |
|         |             |         |         |          | 7.24428E-09 | 2923.33 | 6541.2  | 2.23759  |
| 4.35773 | 5.76282E-11 | 2836.98 | 26900.4 | 9.48207  | 1.20592E-13 | 3241.87 | 39723.2 | 12.2532  |
| 3.08424 | 3.94224E-11 | 5407.5  | 47077.6 | 8.70597  | 1.87756E-14 | 4539.68 | 65143.3 | 14.3498  |
|         | 2.74207E-06 | 1503    | 723.767 | -2.07664 |             |         |         |          |
|         |             |         |         |          | 1.0169E-08  | #DIV/0! | 2721.73 | #DIV/0!  |
|         |             |         |         |          | 1.90099E-05 | 21279.8 | 3710.35 | -5.73525 |
|         | 2.55116E-06 | 17539.6 | 37788.3 | 2.15445  | 5.14669E-12 | 8104.45 | 31282.5 | 3.85992  |
|         | 3.74795E-06 | 18668.7 | 40210   | 2.15387  | 3.18191E-13 | 7519.68 | 36094.5 | 4.8      |
|         |             |         |         |          | 8.62253E-05 | 1229.78 | 589.967 | -2.08448 |
|         |             |         |         |          | 0.00479868  | 1337.63 | 603.075 | -2.21801 |
|         |             |         |         |          | 0.0108993   | 1822.2  | 902.3   | -2.01951 |
|         |             |         |         |          | 7.51897E-09 | 4968.03 | 11331.4 | 2.28086  |
|         |             |         |         |          | 0.000386734 | #DIV/0! | 2358.73 | #DIV/0!  |
|         |             |         |         |          | 1.81084E-08 | 9583.48 | 19508.7 | 2.03566  |
|         | 6.70433E-05 | 1109.43 | 349.025 | -3.17864 | 1.54522E-05 | 2120.48 | 557.525 | -3.80337 |
|         |             |         |         |          | 0.00191299  | 796.1   | 304.9   | -2.61102 |
|         |             |         |         |          | 2.5388E-12  | 5136.43 | 14269.2 | 2.77805  |
|         | 3.00927E-07 | 1628.48 | 4244.7  | 2.60655  |             |         |         |          |
|         | 6.04414E-08 | 2398.55 | 7708.15 | 3.21367  | 1.03787E-09 | 1779.3  | 7853.28 | 4.41369  |
|         | 0.000162766 | 682.575 | 268.2   | -2.54502 | 0.00005581  | 1309.3  | 514.225 | -2.54616 |
|         | 0.0042116   | 1018.57 | 471.167 | -2.1618  |             |         |         |          |
|         |             |         |         |          | 9.90873E-05 | 2916.85 | 1067.6  | -2.73216 |
|         |             |         |         |          | 1.29886E-05 | 2203    | 633.3   | -3.4786  |
| -2.1136 | 0.00142965  | 5388.75 | 2077.28 | -2.59414 |             |         |         |          |
|         | 0.0070985   | 2194.15 | 1029.3  | -2.13169 |             |         |         |          |
|         | 3.34348E-06 | 1341.47 | #DIV/0! | #DIV/0!  |             |         |         |          |
|         |             |         |         |          | 1.12452E-08 | 3043    | 991.975 | -3.06762 |
|         |             |         |         |          | 0.00189242  | 1843.73 | 740.1   | -2.49118 |
|         | 0.000060389 | 2311.93 | 5596.25 | 2.42059  | 1.41329E-07 | 2199.5  | 4447.9  | 2.02223  |
|         | 5.44156E-06 | 1178.48 | 422.533 | -2.78907 |             |         |         |          |
|         |             |         |         |          | 6.19975E-05 | 1332.88 | 510.45  | -2.61118 |
|         |             |         |         |          | 1.63485E-05 | 2118.03 | 833.675 | -2.54059 |
|         | 0.000402964 | 526.875 | 209.8   | -2.51132 | 0.000735294 | 1022.33 | 423.967 | -2.41133 |
|         |             |         |         |          | 0.000273538 | #DIV/0! | 2410.23 | #DIV/0!  |
|         |             |         |         |          | 2.26008E-05 | 1823.95 | 4151.35 | 2.27602  |
|         |             |         |         |          | 1.03754E-08 | 1287.63 | 6140.55 | 4.76887  |
|         |             |         |         |          | 0.00346231  | #DIV/0! | 1132.7  | #DIV/0!  |
|         |             |         |         |          | 1.03954E-07 | 1179.33 | 4115.75 | 3.4899   |
|         |             |         |         |          | 1.13419E-07 | 3522.45 | 12923.1 | 3.66877  |
|         |             |         |         |          | 1.66731E-06 | 3292.27 | 1449.38 | -2.27151 |
|         |             |         |         |          | 0.0131122   | #DIV/0! | 1028.6  | #DIV/0!  |

|         |             |         |         |          |             |         |         |          |
|---------|-------------|---------|---------|----------|-------------|---------|---------|----------|
|         |             |         |         |          | 0.0123776   | #DIV/0! | 1182.83 | #DIV/0!  |
| 2.05598 | 1.62247E-05 | 1167.38 | 3517.58 | 3.01323  | 0.000412326 | #DIV/0! | 1188.83 | #DIV/0!  |
|         |             |         |         |          | 1.09338E-07 | #DIV/0! | 4229.68 | #DIV/0!  |
|         |             |         |         |          | 3.92573E-15 | 25242.7 | 68656.5 | 2.71986  |
|         |             |         |         |          | 4.12738E-17 | 6704.63 | 20976.8 | 3.1287   |
|         | 0.000328387 | 1563.33 | 718.867 | -2.17471 | 0.00143931  | 2322.28 | 988.6   | -2.34905 |
|         |             |         |         |          | 1.17587E-05 | 14799.6 | 31607.9 | 2.13573  |
|         |             |         |         |          | 0.000629324 | 1119.58 | 513.5   | -2.18028 |
|         |             |         |         |          | 1.63553E-06 | 1008.58 | 2417.35 | 2.3968   |
|         |             |         |         |          | 5.55458E-11 | #DIV/0! | 7028.28 | #DIV/0!  |
|         |             |         |         |          | 9.28687E-05 | 1128.93 | 300.2   | -3.76058 |
|         | 8.62973E-06 | 1649.65 | 654.25  | -2.52144 | 2.91767E-08 | 3113.13 | 848.75  | -3.66789 |
|         | 2.19723E-05 | 506.55  | 192.833 | -2.62688 | 8.28775E-09 | 1254.28 | 323.1   | -3.882   |
|         |             |         |         |          | 9.32582E-08 | 2770.6  | 9783.63 | 3.53123  |
|         |             |         |         |          | 3.61759E-06 | 1019.83 | 5923.55 | 5.8084   |
|         |             |         |         |          | 9.5792E-15  | 6623.83 | 54845.8 | 8.28008  |
|         |             |         |         |          | 6.73498E-08 | #DIV/0! | 1676.35 | #DIV/0!  |
| 4.6898  | 4.96425E-07 | 873.8   | 6000.3  | 6.8669   | 7.17562E-07 | 1380.7  | 7315.4  | 5.29833  |
| 6.81304 | 6.8947E-08  | 814.725 | 8967.2  | 11.0064  | 2.42833E-06 | 1686.6  | 10826.3 | 6.41902  |
| #DIV/0! | 0.000251776 | #DIV/0! | 2692.17 | #DIV/0!  | 2.92845E-07 | #DIV/0! | 3514.03 | #DIV/0!  |
|         |             |         |         |          | 1.05754E-05 | 1637.9  | 696.675 | -2.35102 |
|         |             |         |         |          | 4.78302E-07 | 880.1   | #DIV/0! | #DIV/0!  |
|         |             |         |         |          | 0.010348    | 1168.97 | 179.7   | -6.5051  |
|         | 1.14099E-06 | 5538.88 | 13546.3 | 2.44568  | 9.62095E-12 | 2342.4  | 9475.03 | 4.04501  |
|         | 2.04387E-05 | 11786   | 26209.2 | 2.22376  | 1.79245E-13 | 3400.08 | 19934.6 | 5.86297  |
|         | 3.49595E-07 | 1291.1  | 482.95  | -2.67336 |             |         |         |          |
|         |             |         |         |          | 0.0108202   | 1125.03 | 313.033 | -3.59395 |
|         |             |         |         |          | 0.00419605  | 1383.4  | 612.4   | -2.25898 |
|         |             |         |         |          | 0.0170829   | 1368.47 | #DIV/0! | #DIV/0!  |
|         | 9.65478E-13 | 10765.4 | 34115.1 | 3.16896  | 1.01717E-17 | 4390.57 | 21623.5 | 4.92499  |
|         |             |         |         |          | 7.22102E-11 | 11831.3 | 57244   | 4.83834  |
|         | 6.84166E-06 | 25341.1 | 62443.5 | 2.46412  | 3.21207E-12 | 8797.03 | 45308.7 | 5.15045  |
|         |             |         |         |          |             |         |         |          |
|         | 1.81761E-08 | 7896.33 | 25826.7 | 3.27072  | 2.44489E-10 | 3763.88 | 13907.1 | 3.6949   |
|         | 8.34293E-06 | 18062   | 45528.5 | 2.52068  | 1.01038E-10 | 7661.68 | 31174.4 | 4.06888  |
|         |             |         |         |          | 6.87625E-08 | 1904.25 | 4908.65 | 2.57773  |
|         |             |         |         |          | 0.000365104 | #DIV/0! | 2387.68 | #DIV/0!  |
|         | 2.87212E-05 | 2585.03 | 6683.6  | 2.58551  | 0.000303696 | 1505.65 | 3478    | 2.30997  |
|         | 7.95874E-07 | 6235.9  | 13395.7 | 2.14815  | 1.70841E-08 | 3263.05 | 8248.1  | 2.52773  |
|         |             |         |         |          | 0.00013773  | 3179.8  | 486.475 | -6.53641 |
|         | 0.00125663  | 798.567 | 191.15  | -4.1777  | 0.000177611 | 2092.65 | 445.867 | -4.69344 |
|         | 0.0152784   | 995.267 | #DIV/0! | #DIV/0!  | 0.000248585 | 2723.95 | 611.9   | -4.45163 |
|         |             |         |         |          | 0.000666697 | 1276.85 | 485     | -2.63268 |
|         | 5.75847E-05 | 2806.08 | 5738    | 2.04485  |             |         |         |          |
|         |             |         |         |          | 0.00159424  | 2258.63 | 679.9   | -3.322   |
|         |             |         |         |          | 0.00401652  | 2666.53 | 954.75  | -2.79291 |
|         |             |         |         |          | 0.0161567   | 1334.83 | #DIV/0! | #DIV/0!  |
|         |             |         |         |          | 2.79692E-08 | 1349.38 | 501.775 | -2.6892  |
|         |             |         |         |          | 0.00814219  | 907.433 | 382.55  | -2.37206 |
|         |             |         |         |          | 2.65794E-06 | 1686.43 | 525.6   | -3.20857 |
|         |             |         |         |          | 0.00134846  | 1165.68 | 391.2   | -2.97974 |
|         | 5.83431E-05 | 1181.9  | #DIV/0! | #DIV/0!  | 4.68445E-07 | 2295.13 | 735.3   | -3.12136 |
|         |             |         |         |          | 1.35444E-05 | 1969.1  | 7333.45 | 3.72426  |
|         | 0.000057379 | 5346.43 | 2515.93 | -2.12503 | 6.75666E-05 | 9847.2  | 4213.25 | -2.3372  |
| -2.8931 |             |         |         |          |             |         |         |          |
| -2.5302 |             |         |         |          |             |         |         |          |
|         |             |         |         |          | 0.00108855  | 1763.37 | #DIV/0! | #DIV/0!  |
|         | 0.00257436  | #DIV/0! | 1472.3  | #DIV/0!  |             |         |         |          |
| #DIV/0! |             |         |         |          |             |         |         |          |
|         | 0.00306906  | 804.967 | 392.2   | -2.05244 |             |         |         |          |
| 3.51976 | 1.03015E-07 | 1651.45 | 10575   | 6.40345  | 7.14702E-11 | 964.333 | 10426.2 | 10.8118  |
| 2.77753 | 2.29978E-07 | 1379.48 | 7205.5  | 5.22336  | 1.28561E-09 | #DIV/0! | 6183.73 | #DIV/0!  |
|         | 0.00296463  | 1568.3  | 763.975 | -2.05282 |             |         |         |          |

|         |             |         |         |          |             |         |         |          |
|---------|-------------|---------|---------|----------|-------------|---------|---------|----------|
|         | 0.00424854  | 13629.7 | 5778.03 | -2.35888 |             |         |         |          |
|         | 2.58483E-09 | 3271.65 | 1087.18 | -3.00931 | 3.95855E-10 | 5246.78 | 1727.6  | -3.03703 |
|         | 2.29396E-05 | 1536.78 | #DIV/0! | #DIV/0!  | 0.00022365  | 2088.7  | 689.8   | -3.02798 |
|         | 1.0158E-06  | 2447.53 | 1100.4  | -2.22421 |             |         |         |          |
| 2.01419 |             |         |         |          | 4.30899E-07 | 1439.8  | 3442.5  | 2.39096  |
|         |             |         |         |          | 6.17516E-06 | 1700.05 | 4487.63 | 2.6397   |
|         |             |         |         |          | 9.5359E-06  | #DIV/0! | 1891.78 | #DIV/0!  |
|         |             |         |         |          | 5.74493E-06 | 3792.25 | 628.925 | -6.02973 |
|         | 0.0128299   | 28015.3 | 58553.8 | 2.09007  |             |         |         |          |
|         | 0.00937566  | 11115   | 28564.7 | 2.56992  |             |         |         |          |
| 2.2149  | 0.000188111 | 1987.65 | 6677.15 | 3.35932  |             |         |         |          |
|         | 0.00953402  | 1602.83 | 3894.03 | 2.42948  | 2.61553E-05 | 1721.4  | 4942.33 | 2.87111  |
|         |             |         |         |          | 3.43603E-07 | #DIV/0! | 2054.88 | #DIV/0!  |
|         |             |         |         |          | 0.0105823   | 8250.48 | 3693.28 | -2.23392 |
|         | 0.00038745  | 2264.2  | 11208.9 | 4.95047  | 0.000557227 | 2471.27 | 10480.2 | 4.24082  |
|         | 0.00412818  | 997.65  | 414.425 | -2.40731 |             |         |         |          |
|         |             |         |         |          | 0.00277414  | 1069.67 | 233.25  | -4.58592 |
|         |             |         |         |          | 0.0225452   | 1587.53 | 351.8   | -4.51258 |
|         |             |         |         |          | 0.00193767  | 2060.88 | 629.833 | -3.2721  |
| 3.07336 |             |         |         |          |             |         |         |          |
|         |             |         |         |          | 0.0129428   | 2203.03 | 905.6   | -2.43267 |
| 3.43454 | 1.5704E-11  | 5908.33 | 91650.3 | 15.5121  | 4.60401E-14 | 20661.7 | 92468.7 | 4.47537  |
| 2.32166 | 1.34303E-08 | 11624.2 | 102307  | 8.80122  | 2.34946E-13 | 11163.5 | 138946  | 12.4464  |
|         | 1.01762E-07 | 8137.58 | 94340.9 | 11.5932  | 2.30451E-12 | 29497.4 | 106851  | 3.6224   |
|         | 8.73979E-07 | 18758   | 137954  | 7.35441  | 6.35858E-12 | 15495.1 | 195923  | 12.6442  |
| 2.42629 | 3.03139E-08 | 8628.13 | 75167.8 | 8.71194  | 1.50372E-13 | 6148.13 | 91139.6 | 14.824   |
|         | 4.94828E-07 | 3227.08 | 1332.6  | -2.42164 |             |         |         |          |
| -2.4814 |             |         |         |          |             |         |         |          |
| #DIV/0! |             |         |         |          |             |         |         |          |
| -9.169  | 2.48797E-10 | 4666.28 | #DIV/0! | #DIV/0!  |             |         |         |          |
| #DIV/0! | 0.000365543 | 1521.08 | #DIV/0! | #DIV/0!  |             |         |         |          |
|         |             |         |         |          | 0.00219605  | 1469.73 | 581     | -2.52966 |
|         |             |         |         |          | 0.0126584   | 1196.4  | 392.3   | -3.04971 |
| 5.47022 | 7.62627E-08 | #DIV/0! | 4788.8  | #DIV/0!  | 5.96107E-06 | 1345.3  | 5893.83 | 4.38105  |
| 12.1686 | 2.08204E-12 | 603.7   | 8039.28 | 13.3167  | 5.31322E-12 | 812.3   | 8580.4  | 10.5631  |
|         |             |         |         |          | 4.60792E-08 | 1731.23 | 5285.53 | 3.05304  |
|         | 0.00602599  | 728.475 | 289.1   | -2.5198  |             |         |         |          |
|         |             |         |         |          | 2.2617E-09  | 2110.75 | 4673.65 | 2.21421  |
|         |             |         |         |          | 2.94431E-09 | 1335.47 | 4228.65 | 3.16642  |
|         |             |         |         |          | 6.67328E-05 | 2843.07 | 1301.05 | -2.18521 |
| -2.4079 |             |         |         |          |             |         |         |          |
|         | 0.000145391 | 2321.48 | 752.175 | -3.08635 | 0.000373993 | 3335.43 | 1208.5  | -2.75997 |
|         | 0.00132601  | 968.95  | 479.575 | -2.02043 |             |         |         |          |
|         |             |         |         |          | 9.31248E-05 | 1790.08 | 689.067 | -2.59783 |
|         | 2.63351E-05 | 2102.73 | 4969.2  | 2.36322  | 1.31175E-14 | 1627.7  | 8114.03 | 4.98496  |
|         | 0.000129583 | 2060.48 | 4441.18 | 2.15541  | 1.9545E-11  | 1404.88 | 7047.5  | 5.01646  |
|         |             |         |         |          | 3.57112E-17 | #DIV/0! | 5456.55 | #DIV/0!  |
|         | 2.87089E-05 | 771.333 | 341.75  | -2.25701 | 3.84174E-07 | 1017.17 | 313.3   | -3.24662 |
|         | 0.000892674 | 2525.6  | 5450.98 | 2.15829  | 4.36362E-09 | 1608.6  | 5504.15 | 3.4217   |
|         |             |         |         |          | 0.0153959   | 1769.53 | #DIV/0! | #DIV/0!  |
|         |             |         |         |          | 0.00506591  | #DIV/0! | 678.35  | #DIV/0!  |
| 2.63897 |             |         |         |          |             |         |         |          |
|         |             |         |         |          | 0.00624576  | #DIV/0! | 1036.13 | #DIV/0!  |
|         |             |         |         |          | 4.49948E-06 | #DIV/0! | 1256.13 | #DIV/0!  |
|         |             |         |         |          | 2.25556E-05 | 6703.13 | 1817.3  | -3.68851 |
|         |             |         |         |          | 0.00037271  | 5289.7  | 1899.28 | -2.78512 |
|         |             |         |         |          | 0.0162514   | 999.45  | 261.6   | -3.82053 |
|         |             |         |         |          | 0.00154025  | 1684.03 | 450.8   | -3.73564 |
|         |             |         |         |          | 4.23278E-05 | 3748.85 | 624.825 | -5.99984 |
|         | 3.49447E-05 | 986.35  | 257.3   | -3.83346 |             |         |         |          |
|         |             |         |         |          | 2.72317E-06 | 4487.88 | 10750.4 | 2.39543  |
|         |             |         |         |          | 8.29283E-09 | #DIV/0! | 2148.7  | #DIV/0!  |
|         |             |         |         |          | 0.0176869   | #DIV/0! | 1302.1  | #DIV/0!  |

|         |             |         |         |          |             |         |         |          |
|---------|-------------|---------|---------|----------|-------------|---------|---------|----------|
|         |             |         |         |          | 0.000925306 | 993.133 | 432.8   | -2.29467 |
|         | 0.00382539  | 1105.07 | #DIV/0! | #DIV/0!  |             |         |         |          |
|         |             |         |         |          | 6.02491E-05 | 1611.58 | 485.025 | -3.32266 |
| 2.84318 | 1.04053E-06 | 2719.08 | 12823.6 | 4.71617  | 6.07593E-12 | #DIV/0! | 10005.4 | #DIV/0!  |
| -3.6648 | 1.21649E-10 | 14270.2 | 2749.98 | -5.18919 | 4.32798E-10 | 6275.3  | 1473.3  | -4.25935 |
| -2.006  | 1.54617E-08 | 1678.6  | 504.75  | -3.32561 |             |         |         |          |
| 11.2618 | 1.17901E-10 | 791.75  | 11751.5 | 14.8424  | 6.01974E-10 | 1712.6  | 13219   | 7.71867  |
| 10.5473 | 1.42119E-11 | 1628.6  | 22565.8 | 13.8559  | 3.49963E-10 | 2878.33 | 26437.1 | 9.18485  |
|         |             |         |         |          | 2.16252E-08 | 3314.05 | 1152.38 | -2.87584 |
|         |             |         |         |          | 3.70459E-09 | 4168.35 | 1549.85 | -2.68952 |
|         | 0.00036739  | 926.55  | 448.1   | -2.06773 | 0.00282259  | 827.7   | 326.4   | -2.53585 |
| -2.8316 |             |         |         |          |             |         |         |          |
| -2.4966 |             |         |         |          |             |         |         |          |
|         |             |         |         |          | 0.00466307  | 623.725 | #DIV/0! | #DIV/0!  |
|         |             |         |         |          | 1.50287E-06 | 8631.3  | 20807.5 | 2.4107   |
|         |             |         |         |          | 5.11897E-09 | 2547.98 | 1079.33 | -2.36071 |
|         | 1.07022E-08 | 2335.95 | 1161.5  | -2.01115 |             |         |         |          |
|         | 0.00102939  | #DIV/0! | 1298.13 | #DIV/0!  | 1.86065E-07 | #DIV/0! | 1836.28 | #DIV/0!  |
|         |             |         |         |          | 1.49487E-05 | 6476.08 | 1319.63 | -4.90751 |
|         |             |         |         |          | 9.12316E-05 | 1096    | 308.15  | -3.55671 |
|         |             |         |         |          | 0.000457092 | 5179.13 | 1848.1  | -2.80241 |
|         |             |         |         |          | 0.000222269 | 1789.68 | 854.1   | -2.09539 |
|         |             |         |         |          | 6.31601E-07 | 1419.73 | 489.45  | -2.90067 |
| -2.1018 | 9.29098E-05 | 928.4   | 306.6   | -3.02805 | 8.03802E-05 | 1148.5  | 318.2   | -3.60937 |
|         |             |         |         |          | 5.71324E-06 | 1102.63 | 374.167 | -2.9469  |
|         |             |         |         |          | 0.00770505  | 1297.3  | 490.333 | -2.64575 |
|         |             |         |         |          | 0.000020057 | 1136.8  | 366.9   | -3.09839 |
|         |             |         |         |          | 0.000896062 | 2449.5  | 1179.78 | -2.07624 |
| -3.5948 |             |         |         |          |             |         |         |          |
|         |             |         |         |          | 0.000960221 | 1761.6  | 458.7   | -3.84042 |
|         |             |         |         |          | 0.000170419 | 2833.75 | 915.2   | -3.09632 |
|         |             |         |         |          | 1.13108E-07 | 2439    | 5722.7  | 2.34633  |
|         |             |         |         |          | 2.16312E-10 | 16506.3 | 45859.9 | 2.77832  |
|         | 0.000155389 | 4253.55 | 10064.1 | 2.36605  | 1.5767E-10  | 1978    | 6485.05 | 3.27859  |
|         | 1.25562E-06 | #DIV/0! | 1168.67 | #DIV/0!  |             |         |         |          |
|         |             |         |         |          | 0.00393661  | 1779.78 | 649.633 | -2.73966 |
| -6.0918 | 2.07293E-06 | 3960.25 | 673.525 | -5.87989 |             |         |         |          |
| -4.7551 | 2.45866E-05 | 3437.25 | 889.875 | -3.86262 |             |         |         |          |
| -2.5025 | 1.29884E-06 | 1009.47 | #DIV/0! | #DIV/0!  |             |         |         |          |
| #DIV/0! |             |         |         |          |             |         |         |          |
|         | 4.23302E-05 | 842.225 | 357.467 | -2.35609 | 0.000602606 | 1345.5  | 650.067 | -2.06979 |
|         | 1.64267E-05 | 1652    | #DIV/0! | #DIV/0!  |             |         |         |          |
|         | 1.66212E-07 | 1863.15 | 731.567 | -2.54679 |             |         |         |          |
|         | 0.0107157   | 14006.6 | 6520.7  | -2.14802 |             |         |         |          |
|         |             |         |         |          | 1.54049E-05 | 1809.63 | 785.85  | -2.30276 |
|         |             |         |         |          | 0.0052448   | 1330.95 | #DIV/0! | #DIV/0!  |
| -3.4563 |             |         |         |          |             |         |         |          |
|         | 0.00732032  | 567.7   | 214.1   | -2.65156 | 0.000292256 | 1408.78 | 443.3   | -3.17793 |
|         |             |         |         |          | 0.000352876 | 1435.03 | 378.8   | -3.78837 |
|         | 0.00613434  | #DIV/0! | 1567.33 | #DIV/0!  | 0.00136648  | #DIV/0! | 1641.5  | #DIV/0!  |
| -3.2903 | 2.45415E-05 | 1451.13 | 388.025 | -3.73977 | 5.51057E-05 | 1580.53 | 442.6   | -3.571   |
|         | 2.40923E-05 | 602.8   | 265.7   | -2.26872 |             |         |         |          |
|         | 2.44029E-05 | 788.9   | #DIV/0! | #DIV/0!  | 4.74305E-06 | 1132.1  | 233     | -4.8588  |
|         | 0.00033445  | 954.325 | 380.45  | -2.50841 | 6.41807E-07 | 2263.4  | 446.5   | -5.0692  |
|         |             |         |         |          | 9.27083E-05 | 9913.33 | 4268.5  | -2.32244 |
| 4.16874 | 0.000161332 | 1154.3  | 3087.7  | 2.67495  | 5.42253E-07 | 846.9   | 1801.3  | 2.12693  |
| 2.26085 | 0.000762275 | 2650.2  | 5615.85 | 2.11903  |             |         |         |          |
|         |             |         |         |          | 0.0043925   | 1228.95 | 297.05  | -4.13718 |
|         |             |         |         |          | 9.48976E-05 | 4094.23 | 1021.55 | -4.00786 |
|         |             |         |         |          | 0.00814245  | 2025.03 | 807     | -2.50932 |
|         | 0.00021726  | 638.525 | 246     | -2.59563 | 0.0185968   | 932.6   | 435.067 | -2.14358 |
|         |             |         |         |          |             |         |         |          |
| 2.20421 | 1.15792E-09 | 5787.8  | 29435.2 | 5.08573  |             |         |         |          |

|         |             |         |         |          |             |         |         |          |
|---------|-------------|---------|---------|----------|-------------|---------|---------|----------|
|         |             |         |         |          | 3.25698E-13 | 3652.63 | 10582.5 | 2.89724  |
|         |             |         |         |          | 1.13945E-14 | 2294.88 | 8873.05 | 3.86646  |
| -3.8518 | 4.41515E-08 | 1694.83 | 388.567 | -4.36174 | 5.4012E-08  | 2261.83 | 553.35  | -4.08751 |
|         | 9.15545E-05 | 1265.53 | 341.05  | -3.71067 | 0.00489275  | 1647.68 | 712.15  | -2.31366 |
|         | 0.00136222  | 1840.43 | #DIV/0! | #DIV/0!  |             |         |         |          |
|         | 0.000582057 | 1139.05 | 382.9   | -2.9748  | 0.00397025  | 1676.3  | 599.767 | -2.79492 |
|         |             |         |         |          | 1.58497E-09 | 3862.58 | 1339.83 | -2.88288 |
|         |             |         |         |          | 1.80855E-11 | 4605.28 | 10401.3 | 2.25856  |
|         | 0.000192687 | #DIV/0! | 1319.73 | #DIV/0!  |             |         |         |          |
| 2.57791 | 0.000283689 | #DIV/0! | 2308.07 | #DIV/0!  |             |         |         |          |
|         | 0.000861847 | 761.225 | 282     | -2.69938 | 7.27364E-05 | 1648.35 | 540.767 | -3.04817 |
|         | 0.000495586 | 1943.33 | 964.2   | -2.01548 |             |         |         |          |
| 2.07331 | 2.8963E-10  | 5351.95 | 15864.1 | 2.96417  | 2.60079E-13 | 3146.53 | 11628.4 | 3.69563  |
|         | 3.60406E-05 | 1852.23 | 777.767 | -2.38147 |             |         |         |          |
|         |             |         |         |          | 2.28055E-09 | 2412.1  | 5102.2  | 2.11525  |
|         |             |         |         |          | 0.000587578 | #DIV/0! | 1076.55 | #DIV/0!  |
|         |             |         |         |          | 3.97848E-08 | 1717.35 | 4272.63 | 2.48792  |
|         |             |         |         |          | 5.54643E-06 | 1499.9  | 634.325 | -2.36456 |
| -2.0918 | 0.00198454  | 3423.95 | 1326.3  | -2.58158 | 0.00276821  | 3790.63 | 1663.73 | -2.2784  |
|         |             |         |         |          | 0.00225031  | 1237.53 | 348.4   | -3.55205 |
|         |             |         |         |          | 2.28151E-08 | 1873.53 | 799.35  | -2.34381 |
|         |             |         |         |          | 1.34223E-08 | 12522.2 | 29622.5 | 2.36559  |
| -2.484  | 2.19009E-06 | 2160.28 | 983.8   | -2.19585 |             |         |         |          |
|         | 0.00321696  | 1411.03 | 664.65  | -2.12296 |             |         |         |          |
|         | 0.00778871  | 694.4   | #DIV/0! | #DIV/0!  |             |         |         |          |
|         |             |         |         |          | 6.94947E-10 | 7305.08 | 20301.2 | 2.77905  |
|         |             |         |         |          | 1.59704E-10 | 1768.58 | 5824.98 | 3.2936   |
|         |             |         |         |          | 1.30764E-05 | 1185.53 | 497.275 | -2.38404 |
|         |             |         |         |          | 8.99744E-09 | 5853.1  | 12124.8 | 2.07152  |
|         |             |         |         |          | 0.00219779  | 894.867 | 1940.73 | 2.16873  |
|         |             |         |         |          | 4.57845E-16 | 4934.68 | 15557.9 | 3.15276  |
|         | 1.73564E-07 | 15112.9 | 32615.7 | 2.15813  | 3.04711E-08 | 8178.2  | 18217   | 2.22751  |
|         | 8.26136E-08 | #DIV/0! | 1771.77 | #DIV/0!  |             |         |         |          |
|         | 3.35415E-06 | 847.5   | 191.1   | -4.43485 |             |         |         |          |
|         |             |         |         |          | 0.00132803  | 1433.57 | 635.1   | -2.25723 |
|         |             |         |         |          | 3.55037E-05 | 3346.28 | 7324.68 | 2.1889   |
|         |             |         |         |          | 4.84097E-10 | 2557.65 | 6861.9  | 2.68289  |
|         |             |         |         |          | 3.37702E-07 | #DIV/0! | 1553.38 | #DIV/0!  |
| 12.457  | 3.37667E-18 | 1948.33 | 45241.9 | 23.2209  | 7.70952E-22 | 1902.37 | 93761.4 | 49.2867  |
|         | 0.00110089  | 1900.63 | 921.6   | -2.06231 |             |         |         |          |
| 4.02999 | 1.85779E-06 | #DIV/0! | 3986.55 | #DIV/0!  | 0.00107554  | #DIV/0! | 2453.05 | #DIV/0!  |
|         | 0.00028305  | 679.967 | #DIV/0! | #DIV/0!  | 0.00123177  | 801     | #DIV/0! | #DIV/0!  |
| 2.17182 | 3.74365E-08 | 1813.5  | 6358.6  | 3.50626  | 8.10365E-05 | 1255.45 | 2633.68 | 2.09779  |
|         |             |         |         |          | 7.65854E-07 | 14284.6 | 30140.1 | 2.10998  |
|         |             |         |         |          | 0.000835584 | 1364.38 | 598.05  | -2.28137 |
|         |             |         |         |          | 4.48688E-07 | 11502   | 23158.4 | 2.01342  |
|         | 0.000386204 | 1079.15 | 450.325 | -2.39638 |             |         |         |          |
|         | 0.000843005 | 919.65  | 357.225 | -2.57443 | 0.00225102  | 1341.6  | 454.425 | -2.9523  |
| -2.2233 | 2.91562E-06 | 4848.18 | 2028.78 | -2.38971 | 0.00080462  | 2001.77 | 683.725 | -2.92774 |
|         |             |         |         |          | 3.06115E-05 | 1278.33 | 418.567 | -3.05407 |
|         |             |         |         |          | 0.00893982  | 1240.75 | 270.3   | -4.59027 |
|         | 0.00567297  | 2079.78 | 872.375 | -2.38404 | 0.000667642 | 4623.68 | 1347.5  | -3.4313  |
|         |             |         |         |          | 0.000791303 | 804.667 | #DIV/0! | #DIV/0!  |
|         |             |         |         |          | 3.67264E-05 | 3759.98 | 1692.75 | -2.22122 |
|         |             |         |         |          | 4.06945E-06 | 833     | 241.767 | -3.44547 |
|         | 0.0000176   | 1295.38 | 597.367 | -2.16848 | 2.46367E-08 | 1525.87 | 605     | -2.52209 |
| -2.9869 | 6.11156E-06 | 1066.63 | 303     | -3.52021 |             |         |         |          |
|         |             |         |         |          | 0.00110506  | 2190.35 | 454.325 | -4.82111 |
|         |             |         |         |          | 0.0020861   | 982.067 | 394.5   | -2.4894  |

|         |             |         |         |             |         |         |          |
|---------|-------------|---------|---------|-------------|---------|---------|----------|
|         |             |         |         | 2.47996E-13 | 5849.45 | 13662.7 | 2.33573  |
|         |             |         |         | 1.95784E-09 | 3832.15 | 9100.55 | 2.37479  |
|         |             |         |         | 9.40716E-10 | 1826.7  | 4379.28 | 2.39737  |
|         |             |         |         | 0.0202571   | #DIV/0! | 2733.93 | #DIV/0!  |
|         |             |         |         | 8.00505E-08 | 2289.53 | 5120.53 | 2.2365   |
| #DIV/0! |             |         |         | 8.67421E-06 | 2525.23 | #DIV/0! | #DIV/0!  |
|         |             |         |         | 5.33331E-08 | 2990.7  | 9048.33 | 3.02549  |
|         |             |         |         | 2.57276E-12 | 2367.05 | 9495.83 | 4.01167  |
|         |             |         |         | 1.09481E-12 | 4592.18 | 10363.7 | 2.25681  |
|         |             |         |         | 2.78406E-11 | 9724.58 | 28508.5 | 2.93159  |
|         |             |         |         | 3.36262E-16 | 7757.88 | 22923.1 | 2.95482  |
|         |             |         |         | 3.69084E-17 | 15957.1 | 51752.3 | 3.24322  |
|         |             |         |         | 8.58124E-05 | 2390.05 | 839.9   | -2.84564 |
|         |             |         |         | 0.00499168  | 3616.05 | 812.475 | -4.45066 |
|         |             |         |         | 0.00967642  | #DIV/0! | 1568.3  | #DIV/0!  |
|         |             |         |         | 0.000284228 | 1314.33 | 456.55  | -2.87882 |
|         |             |         |         | 7.97189E-06 | 747.067 | #DIV/0! | #DIV/0!  |
|         |             |         |         | 0.0173212   | 1484.73 | 470.5   | -3.15563 |
|         |             |         |         | 5.90819E-08 | #DIV/0! | 11367.6 | #DIV/0!  |
| 5.7539  | 8.08302E-05 | #DIV/0! | 3328.73 | #DIV/0!     |         |         |          |
| 2.47743 |             |         |         | 3.44386E-05 | 813.4   | 393.1   | -2.06919 |
|         |             |         |         | 5.05034E-11 | 3225.43 | 1142.73 | -2.82257 |
| -2.0387 | 8.5829E-08  | 1734.88 | 766.425 | -2.26359    |         |         |          |
| -2.7739 | 1.51332E-07 | 2135.28 | 766.75  | -2.78484    |         |         |          |
|         |             |         |         | 3.95256E-06 | 3326.33 | 1274.9  | -2.60909 |
|         |             |         |         | 8.44565E-11 | 59787.5 | 199201  | 3.33182  |
|         |             |         |         | 8.09558E-13 | 15422.5 | 74616   | 4.83814  |
| 4.92452 | 0.000199391 | 38933.5 | 81145.9 | 2.08422     |         |         |          |
|         | 4.62726E-13 | 1655.95 | 19693.9 | 11.8928     |         |         |          |
|         |             |         |         | 9.43125E-12 | 1490.97 | 9499.95 | 6.37167  |
|         |             |         |         | 0.00874146  | 1341.88 | 286.6   | -4.68205 |
|         |             |         |         | 0.00322254  | 1330.77 | 332.8   | -3.9987  |
|         |             |         |         | 0.00788127  | 2797.45 | 688.167 | -4.06508 |
|         |             |         |         | 0.000428265 | #DIV/0! | 5106.23 | #DIV/0!  |
|         |             |         |         | 1.33087E-07 | 5026.3  | 18231.9 | 3.6273   |
| -2.1245 |             |         |         | 5.08956E-05 | 2719.5  | 636.05  | -4.27561 |
| #DIV/0! | 0.00118121  | 1025.98 | 274.05  | -3.74375    |         |         |          |
|         | 7.56266E-06 | 1410.05 | 375.9   | -3.75113    |         |         |          |
|         | 0.000579616 | 550.667 | #DIV/0! | #DIV/0!     |         |         |          |
|         | 0.00133716  | 543.4   | #DIV/0! | #DIV/0!     |         |         |          |
|         |             |         |         | 0.00482561  | 1329.7  | 307.4   | -4.32563 |
|         |             |         |         | 0.00122511  | 1349.75 | 420.1   | -3.21293 |
|         | 5.18934E-05 | 533.3   | 157.5   | -3.38603    |         |         |          |
|         |             |         |         | 1.43867E-05 | 3985.9  | 9011.43 | 2.26083  |
|         |             |         |         | 9.19773E-08 | 2078.08 | 7003.1  | 3.36999  |
|         |             |         |         | 1.09212E-10 | 7925.08 | 30359   | 3.83075  |
|         | 8.60927E-06 | 885.3   | 312.9   | -2.82934    |         |         |          |
|         |             |         |         | 0.000020396 | 965.225 | 406.2   | -2.37623 |
|         |             |         |         | 4.29447E-07 | 1530.77 | 670.225 | -2.28396 |
|         | 4.65782E-14 | 6512.7  | 1744.93 | -3.73237    |         |         |          |
|         | 4.19164E-14 | 8131.03 | 2122.8  | -3.83033    |         |         |          |
|         |             |         |         | 1.52575E-14 | 4205.63 | 1121.78 | -3.74908 |
|         |             |         |         | 8.37853E-14 | 4564.38 | 1347.45 | -3.38742 |
|         |             |         |         | 2.10483E-10 | 12405.2 | 4959.1  | -2.50149 |
|         |             |         |         | 3.29681E-07 | 6390.75 | 2675.23 | -2.38886 |
|         |             |         |         | 7.73654E-10 | 8103.08 | 3759.38 | -2.15543 |
|         |             |         |         | 1.71621E-06 | 3796.53 | 13238   | 3.48686  |
|         |             |         |         | 0.00844347  | #DIV/0! | 747.4   | #DIV/0!  |
| -2.5371 |             |         |         | 0.00424982  | 1448.73 | 595.4   | -2.43321 |
|         |             |         |         | 0.00563819  | 1539.83 | 386.7   | -3.98196 |
|         | 6.99695E-08 | #DIV/0! | 536.667 | #DIV/0!     |         |         |          |
|         |             |         |         | 0.000172723 | #DIV/0! | 1248.1  | #DIV/0!  |
|         |             |         |         | 2.7832E-10  | 4422.13 | 13073.9 | 2.95647  |
|         | 1.99022E-10 | 18322.9 | 49395.4 | 2.69583     |         |         |          |
|         | 2.08661E-12 | 5665.65 | 20859.9 | 3.68181     |         |         |          |
|         |             |         |         | 8.05878E-19 | 1971.6  | 16011.3 | 8.12097  |

|             |             |         |          |             |             |         |          |
|-------------|-------------|---------|----------|-------------|-------------|---------|----------|
|             |             |         |          | 0.00559584  | 1431.53     | 544.2   | -2.63051 |
| 0.0123235   | 507.65      | #DIV/0! | #DIV/0!  |             |             |         |          |
|             |             |         |          | 0.000628608 | 1964.95     | 587.375 | -3.34531 |
|             |             |         |          | 0.00168385  | 2679.65     | 1145.38 | -2.33954 |
|             |             |         |          | 6.92043E-06 | 1511.25     | 3401.28 | 2.25064  |
|             |             |         |          | 6.23716E-06 | 2059.65     | 5074.38 | 2.46371  |
|             |             |         |          | 8.21498E-09 | 9102.28     | 22595.8 | 2.48243  |
| 3.64614E-07 | 9260.83     | 21196.3 | 2.28881  | 1.37285E-11 | 7827.18     | 29994.8 | 3.83213  |
| 3.47901E-09 | 3437.4      | 8030.93 | 2.33634  | 7.78674E-15 | 2301.53     | 9358    | 4.066    |
|             |             |         |          | 8.75453E-06 | 2247.35     | 1059.3  | -2.12154 |
| 0.00227926  | 1458.18     | 439.967 | -3.31429 |             |             |         |          |
| 0.00297054  | 975.833     | #DIV/0! | #DIV/0!  |             |             |         |          |
|             |             |         |          | 0.000156085 | #DIV/0!     | 806.3   | #DIV/0!  |
|             |             |         |          | 8.09501E-07 | 2531.53     | 652.425 | -3.88018 |
| 0.000045404 | 5944        | 12378.1 | 2.08245  | 2.03715E-06 | 3632.88     | 8248.85 | 2.27061  |
| 8.65115E-07 | 9218.53     | 3763.28 | -2.4496  | 4.61324E-06 | 15795.6     | 7113.55 | -2.22049 |
| 0.000333552 | 13937.6     | 29928.5 | 2.14733  | 1.05109E-08 | 4502.18     | 20645.4 | 4.58564  |
|             |             |         |          | 0.00092558  | 2143.1      | 4517.13 | 2.10775  |
| 1.87073E-07 | 851.4       | 281.2   | -3.02774 | 7.67109E-07 | 1452.28     | 497.225 | -2.92076 |
| 4.87151E-07 | 314.9       | 3496.93 | 11.1049  | 0.0101852   | 1154.4      | 2718.2  | 2.35464  |
| 3.72665E-05 | 753.05      | 335.925 | -2.24172 | 6.10955E-05 | 1395.13     | 650.2   | -2.14569 |
|             |             |         |          | 3.11242E-06 | 2609.85     | 1223.83 | -2.13254 |
|             |             |         |          | 0.000430187 | 1454.6      | 506.9   | -2.8696  |
|             |             |         |          | 0.00053323  | 2971.1      | 863.725 | -3.43987 |
|             |             |         |          | 7.80007E-06 | 2145.5      | 6125.68 | 2.85513  |
| 1.56641E-07 | 943.5       | 400.1   | -2.35816 | 6.00634E-09 | 1723.38     | 647.8   | -2.66035 |
| #DIV/0!     | 1.42453E-06 | 1364.6  | #DIV/0!  | #DIV/0!     | 5.33057E-05 | 1942.57 | 874.067  |
|             |             |         |          | 0.00244772  | 2771.43     | 1248.43 | -2.21994 |
|             |             |         |          | 0.000596058 | 2009.8      | 361.833 | -5.55449 |
|             |             |         |          | 0.000415984 | 1738.43     | 442.233 | -3.93101 |
|             |             |         |          | 0.00339892  | 1728.15     | 476.6   | -3.626   |
|             |             |         |          | 0.0230354   | 1029.67     | #DIV/0! | #DIV/0!  |
|             |             |         |          | 5.50656E-05 | 2229.23     | 4619.48 | 2.07223  |
| 17.0212     | 3.34941E-10 | 1593.55 | 33412.3  | 20.9672     |             |         |          |
|             | 7.39503E-09 | 14455.7 | 36868.5  | 2.55045     |             |         |          |
|             |             |         |          | 2.62576E-12 | 9393.2      | 34370.1 | 3.65904  |
|             |             |         |          | 1.82038E-05 | 561.95      | 204.65  | -2.74591 |
|             |             |         |          | 0.011278    | 1040.23     | #DIV/0! | #DIV/0!  |
|             |             |         |          | 0.000142078 | 3037.23     | #DIV/0! | #DIV/0!  |
|             | 9.52403E-06 | 1624.6  | 642.1    | -2.53014    |             |         |          |
| -4.0139     | 1.85581E-05 | 1048.38 | #DIV/0!  | #DIV/0!     |             |         |          |
|             |             |         |          | 1.20739E-05 | 1146.75     | 471.875 | -2.4302  |
|             |             |         |          | 0.000203977 | #DIV/0!     | 1477.2  | #DIV/0!  |
|             |             |         |          | 0.00117023  | 3758.05     | 8822.08 | 2.34751  |
|             |             |         |          | 5.22886E-14 | 4717.5      | 11117   | 2.35653  |
|             |             |         |          | 0.000212428 | #DIV/0!     | 2579.2  | #DIV/0!  |
|             |             |         |          | 0.000935086 | #DIV/0!     | 769.425 | #DIV/0!  |
|             |             |         |          | 6.70224E-05 | #DIV/0!     | 1405.75 | #DIV/0!  |
|             |             |         |          | 0.0105422   | 1303.7      | 234.3   | -5.56423 |
|             |             |         |          | 1.34405E-11 | 1563.2      | 3886.4  | 2.48618  |
|             |             |         |          | 4.88476E-15 | 2331.88     | 8052.48 | 3.45322  |
|             |             |         |          | 1.14667E-06 | 2611.18     | 859.367 | -3.03849 |
|             |             |         |          | 0.0159116   | 1083.55     | 369.35  | -2.93367 |
|             |             |         |          | 4.55235E-08 | 9741.15     | 19950.8 | 2.04809  |
|             |             |         |          | 3.32523E-17 | 20338       | 107384  | 5.27995  |
|             |             |         |          | 6.72396E-10 | #DIV/0!     | 2863.08 | #DIV/0!  |
|             |             |         |          | 3.75381E-09 | 3157.43     | 972.633 | -3.24626 |
|             |             |         |          | 2.39286E-05 | 1215.35     | 400.3   | -3.0361  |
|             |             |         |          | 8.34388E-05 | 1797.23     | 897.55  | -2.00237 |
|             |             |         |          | 1.46962E-13 | 2775.5      | 7865.48 | 2.83389  |
|             |             |         |          | 2.60877E-08 | #DIV/0!     | 4438.13 | #DIV/0!  |
|             |             |         |          | 5.12772E-07 | 5836.75     | 2070.37 | -2.81919 |
|             |             |         |          | 0.0135067   | 1106.8      | 322.325 | -3.4338  |
|             |             |         |          | 0.00873918  | 766.633     | 182.5   | -4.20073 |
|             |             |         |          | 7.33729E-07 | 1714.6      | 8387.83 | 4.892    |
|             |             |         |          | 8.39203E-11 | #DIV/0!     | 7136.85 | #DIV/0!  |

|         |             |         |         |          |             |         |         |          |
|---------|-------------|---------|---------|----------|-------------|---------|---------|----------|
|         |             |         |         |          | 0.0127274   | #DIV/0! | 2226.57 | #DIV/0!  |
|         | 0.00014596  | 5914.45 | 2323.83 | -2.54514 | 2.11495E-06 | 11737.5 | 3439.28 | -3.41278 |
|         |             |         |         |          | 0.0101118   | 1614.2  | 756.625 | -2.13342 |
|         |             |         |         |          | 0.00156815  | 7308.65 | 3448    | -2.11968 |
|         |             |         |         |          | 0.0031226   | 943.675 | 460.775 | -2.04802 |
|         | 0.00815857  | 508.733 | 166.4   | -3.05729 | 7.45997E-07 | 769.8   | 217.4   | -3.54094 |
|         | 1.31838E-06 | 3643.03 | 8258    | 2.2668   | 6.54019E-12 | 2286.4  | 10706.2 | 4.68256  |
| -2.4302 | 3.74032E-05 | 16243.9 | 6262.23 | -2.59394 |             |         |         |          |
| -3.059  |             |         |         |          |             |         |         |          |
| -2.5495 |             |         |         |          |             |         |         |          |
|         |             |         |         |          | 3.50611E-12 | 7123.65 | 20729.9 | 2.91     |
|         |             |         |         |          | 0.00090632  | #DIV/0! | 4855.27 | #DIV/0!  |
|         | 7.23483E-05 | 1048.43 | 329.7   | -3.17994 | 1.06777E-06 | 1769.08 | 613.7   | -2.88264 |
|         |             |         |         |          | 6.87564E-12 | 6523.45 | 14937.7 | 2.28984  |
|         |             |         |         |          | 0.00128434  | 1978.4  | 956.45  | -2.06848 |
|         |             |         |         |          | 1.00878E-08 | 5172.83 | 11552.1 | 2.23322  |
|         |             |         |         |          | 2.74316E-12 | 14011   | 37183.4 | 2.65387  |
|         | 3.34568E-06 | 5439.43 | 12268   | 2.25538  | 2.53288E-13 | 2850.9  | 13785.6 | 4.83551  |
|         | 4.55828E-08 | 12191.4 | 24538.4 | 2.01276  | 5.22828E-17 | 8654.43 | 40742.2 | 4.70767  |
|         | 2.11825E-05 | 575.575 | #DIV/0! | #DIV/0!  |             |         |         |          |
|         |             |         |         |          | 4.58504E-06 | 3244.7  | 847.733 | -3.8275  |
|         |             |         |         |          | 6.08464E-10 | 3003.9  | 7056.48 | 2.3491   |
|         |             |         |         |          | 3.08186E-05 | 1963.33 | 5296.13 | 2.69753  |
|         |             |         |         |          | 0.00142648  | 1476.47 | #DIV/0! | #DIV/0!  |
| -2.2892 |             |         |         |          |             |         |         |          |
| -2.1537 | 0.000399923 | 1875.63 | 905.1   | -2.07228 | 1.56592E-06 | 4013.73 | 1532.18 | -2.61963 |
|         |             |         |         |          | 3.26325E-06 | 830.167 | 214.2   | -3.87566 |
| -2.2818 |             |         |         |          |             |         |         |          |
|         | 0.000140412 | 877.325 | 336.5   | -2.60721 | 4.25822E-07 | 1914.23 | 536.25  | -3.56965 |
|         |             |         |         |          | 0.00774168  | 4284.8  | 8841.63 | 2.06349  |
|         |             |         |         |          | 0.0149907   | 7243.55 | 16156.8 | 2.23051  |
| -2.3374 |             |         |         |          |             |         |         |          |
|         |             |         |         |          | 1.72325E-10 | 14476.1 | 31381   | 2.16777  |
|         |             |         |         |          | 6.28515E-10 | 9229.3  | 23651.2 | 2.56262  |
|         |             |         |         |          | 1.70107E-10 | 7138.2  | 24583.7 | 3.44396  |
|         |             |         |         |          | 1.77179E-09 | 1695.05 | 4591.28 | 2.70864  |
|         |             |         |         |          | 6.98531E-07 | 1879.75 | 677.175 | -2.77587 |
|         | 4.58521E-05 | 2332.98 | 4763.95 | 2.04201  | 3.55105E-10 | #DIV/0! | 3778.03 | #DIV/0!  |
|         | 6.80986E-10 | 2968.75 | 6021.95 | 2.02845  |             |         |         |          |
| #DIV/0! |             |         |         |          |             |         |         |          |
|         |             |         |         |          | 4.71623E-08 | 3846.33 | 1385.2  | -2.77674 |
|         | 0.00185978  | 19680.6 | 7764.88 | -2.53456 | 0.000158368 | 11300.2 | 3936.65 | -2.87052 |
|         | 0.0152393   | 817     | 382.933 | -2.13353 |             |         |         |          |
|         |             |         |         |          | 4.42246E-07 | 3460    | 7496.15 | 2.16652  |
|         | 4.36932E-08 | 20226.1 | 40763.8 | 2.01541  | 6.7536E-13  | 10028.6 | 31219.4 | 3.11303  |
|         | 7.27781E-09 | 12974.7 | 34810.6 | 2.68296  | 2.67502E-15 | 5744.2  | 26388.3 | 4.5939   |
|         |             |         |         |          | 5.97858E-13 | 3195.4  | 11158.8 | 3.49214  |
|         | 2.14482E-06 | 5804.53 | 12685.2 | 2.18539  | 5.93268E-13 | 1983.05 | 7825.38 | 3.94613  |
|         |             |         |         |          | 2.86045E-05 | #DIV/0! | 4417.53 | #DIV/0!  |
|         |             |         |         |          | 4.3108E-12  | 7599.95 | 19814.4 | 2.60718  |
|         |             |         |         |          | 7.23134E-06 | 1180.1  | 349.767 | -3.37396 |
|         |             |         |         |          | 7.84559E-11 | 5267.55 | 11475   | 2.17842  |
|         |             |         |         |          | 5.12018E-11 | 5307.15 | 12280.2 | 2.3139   |
|         |             |         |         |          | 3.07271E-15 | 4551    | 13490.7 | 2.96433  |
|         | 0.000242425 | 1280.95 | 499.675 | -2.56357 | 1.07394E-10 | 3435.58 | 653.4   | -5.258   |
| 3.21582 | 5.3478E-12  | 2279.1  | 14742.6 | 6.4686   | 2.78337E-13 | 3644    | 29672   | 8.14271  |
|         | 1.44529E-07 | 1755.73 | 9026.48 | 5.14117  |             |         |         |          |
| -3.6288 | 0.000996702 | 17724.4 | 5494.63 | -3.22577 |             |         |         |          |
|         |             |         |         |          | 2.17553E-07 | 1246.93 | 343.6   | -3.62903 |
|         |             |         |         |          | 8.09092E-07 | 1257.3  | #DIV/0! | #DIV/0!  |



|         |             |         |         |          |             |         |         |          |
|---------|-------------|---------|---------|----------|-------------|---------|---------|----------|
|         |             |         |         |          | 0.000374864 | 2524.57 | 973.167 | -2.59418 |
|         |             |         |         |          | 2.37787E-07 | 2070.38 | 889.975 | -2.32633 |
|         | 0.00263442  | 843.225 | 416.575 | -2.02419 | 0.000334986 | 949.25  | 435.95  | -2.17743 |
|         | 1.40041E-08 | 14397.7 | 36069.6 | 2.50523  | 8.53673E-14 | 7934.83 | 33644.7 | 4.24013  |
|         | 1.02423E-08 | 10234.5 | 29051.4 | 2.83858  | 4.41133E-14 | 5325.83 | 25510.2 | 4.78989  |
|         | 0.0112445   | 1488.8  | #DIV/0! | #DIV/0!  |             |         |         |          |
|         |             |         |         |          | 1.65684E-06 | 2045.48 | 5357.6  | 2.61924  |
|         | 0.00228923  | #DIV/0! | 2238.53 | #DIV/0!  |             |         |         |          |
|         |             |         |         |          | 0.0221444   | 1045.93 | 401.5   | -2.60506 |
|         |             |         |         |          | 0.00334992  | 1140.2  | 529.25  | -2.15437 |
|         |             |         |         |          | 4.81598E-05 | 1857.43 | 4110.03 | 2.21275  |
|         |             |         |         |          | 1.07938E-07 | 5572.77 | 12333.5 | 2.21317  |
| -2.699  | 1.47037E-08 | 1686.9  | #DIV/0! | #DIV/0!  | 8.81768E-12 | 2889.03 | #DIV/0! | #DIV/0!  |
|         |             |         |         |          | 2.47704E-13 | 9926.55 | 2325.2  | -4.26912 |
|         |             |         |         |          | 1.55746E-09 | 7882.68 | 2199    | -3.58466 |
|         | 0.00038215  | 1461.25 | 586.4   | -2.4919  |             |         |         |          |
|         |             |         |         |          | 0.00816388  | 1705.2  | 425.8   | -4.0047  |
|         |             |         |         |          | 0.00740735  | #DIV/0! | 742.8   | #DIV/0!  |
|         |             |         |         |          | 6.08047E-05 | 1485.95 | 2980.5  | 2.00579  |
| 2.23202 | 5.87444E-07 | 3734.3  | 8884.7  | 2.37921  | 1.43069E-07 | 2547.27 | 6167.15 | 2.42109  |
|         |             |         |         |          | 1.02403E-13 | 10687.6 | 21479.5 | 2.00976  |
|         |             |         |         |          | 2.77077E-07 | 2733.83 | 5992.35 | 2.19193  |
| 2.4379  | 2.61828E-12 | 6721.55 | 23767.7 | 3.53604  | 2.25237E-14 | 3854.55 | 16313.4 | 4.23225  |
|         |             |         |         |          | 0.00856315  | #DIV/0! | 1248.4  | #DIV/0!  |
|         |             |         |         |          | 6.24397E-09 | 1228.83 | 2875.43 | 2.33996  |
|         |             |         |         |          | 0.00814308  | #DIV/0! | 1124.93 | #DIV/0!  |
|         |             |         |         |          | 0.000232157 | 2575.1  | 1109.87 | -2.32019 |
|         |             |         |         |          | 1.55687E-06 | 2058.55 | 5888.9  | 2.8607   |
|         |             |         |         |          | 3.66848E-12 | 4902.6  | 16781.2 | 3.42292  |
| -2.5798 | 1.32902E-08 | 5237.08 | 1987.63 | -2.63484 |             |         |         |          |
|         | 0.00792175  | 730.975 | 306.8   | -2.38258 | 0.00716515  | 2128.23 | 647.5   | -3.28683 |
|         |             |         |         |          | 0.00213188  | 1462.85 | 574.667 | -2.54556 |
|         |             |         |         |          | 0.000139278 | 859.925 | 306.767 | -2.80319 |
|         |             |         |         |          | 0.00119479  | #DIV/0! | 764.433 | #DIV/0!  |
|         | 2.11483E-07 | 1632.98 | 647.175 | -2.52324 | 3.61825E-11 | 2589.7  | 726.925 | -3.56254 |
|         |             |         |         |          | 0.00271434  | 1192.23 | 422.4   | -2.82252 |
|         | 2.42307E-06 | 886.025 | 379.933 | -2.33205 | 2.49162E-07 | 1788.9  | 522.025 | -3.42685 |
|         | 0.00829083  | 578.1   | 260.825 | -2.21643 | 9.76579E-05 | 1357.2  | 370.767 | -3.66052 |
|         |             |         |         |          | 1.58554E-05 | 1507.98 | 483.65  | -3.11791 |
|         |             |         |         |          | 2.78668E-07 | 1863.37 | 8559.53 | 4.59358  |
|         |             |         |         |          | 1.45672E-06 | 2664.63 | 754.625 | -3.53106 |
|         | 0.00203691  | 2365.85 | 994.825 | -2.37816 | 0.000336266 | 3384.13 | 1215.03 | -2.78523 |
|         |             |         |         |          | 9.92501E-05 | 1072.2  | #DIV/0! | #DIV/0!  |
|         |             |         |         |          | 0.0029292   | 946.65  | 352.05  | -2.68896 |
|         |             |         |         |          | 3.80911E-05 | 3091.13 | 836.35  | -3.69597 |
|         |             |         |         |          | 0.00111329  | 914.275 | #DIV/0! | #DIV/0!  |
|         |             |         |         |          | 0.00246925  | 811.55  | 278.85  | -2.91035 |
| 3.28598 | 5.33758E-07 | 5956.55 | 36873.1 | 6.19035  | 3.98937E-12 | 3492.9  | 30377   | 8.69678  |
| 2.32402 | 1.86575E-08 | 15174.1 | 78025.9 | 5.14206  | 5.56293E-15 | 5971.4  | 71803.9 | 12.0246  |
|         |             |         |         |          | 0.00426838  | 5311.3  | 11289.9 | 2.12563  |
|         |             |         |         |          | 0.0123293   | 4453.05 | 9638.93 | 2.16457  |
|         | 0.000010713 | 1076.83 | 530.4   | -2.03021 |             |         |         |          |
|         |             |         |         |          | 0.0173974   | #DIV/0! | 4317.33 | #DIV/0!  |
|         |             |         |         |          | 4.51955E-06 | 3048.23 | 6573.98 | 2.15666  |
|         | 2.47052E-08 | 1156.1  | 441.1   | -2.62095 |             |         |         |          |
|         |             |         |         |          | 0.00438625  | 594.267 | #DIV/0! | #DIV/0!  |
| -2.4448 | 4.47194E-07 | 1701.25 | 615.267 | -2.76506 |             |         |         |          |
|         |             |         |         |          | 5.27777E-05 | 4015.8  | 1831.65 | -2.19245 |
| -2.0156 |             |         |         |          |             |         |         |          |
|         |             |         |         |          | 8.7485E-12  | 2503.13 | 6226.8  | 2.48761  |
|         |             |         |         |          | 4.37632E-09 | 810.1   | 2151.3  | 2.6556   |
|         | 0.00147043  | 1217.4  | 2754.35 | 2.26249  | 2.01084E-10 | #DIV/0! | 2008.7  | #DIV/0!  |
|         |             |         |         |          | 2.16808E-05 | 1429.83 | 399.1   | -3.58262 |

|         |             |         |         |          |             |         |         |          |
|---------|-------------|---------|---------|----------|-------------|---------|---------|----------|
| -2.1098 | 0.00025323  | 1774.53 | 820.4   | -2.16301 |             |         |         |          |
|         | 2.88228E-06 | 1104.23 | #DIV/0! | #DIV/0!  |             |         |         |          |
|         | 7.01149E-05 | 1253.87 | #DIV/0! | #DIV/0!  |             |         |         |          |
|         | 2.79948E-09 | 1173.6  | 276.2   | -4.24909 |             |         |         |          |
|         | 4.81052E-07 | 5608.65 | 2498.73 | -2.2446  |             |         |         |          |
|         |             |         |         |          | 0.0120402   | 1174.87 | 572.75  | -2.05127 |
|         |             |         |         |          | 1.08017E-08 | 9471.15 | 23155.9 | 2.44489  |
|         |             |         |         |          | 0.000120277 | 1222.55 | 425.5   | -2.87321 |
|         | 0.0134689   | 915.433 | 330.05  | -2.77362 |             |         |         |          |
|         | 0.000101443 | 2753.25 | 7874.8  | 2.86018  | 5.43482E-11 | 4973.75 | 12478.6 | 2.50889  |
|         |             |         |         |          | 4.67661E-08 | 1888.2  | 5070.55 | 2.68539  |
|         |             |         |         |          | 3.84542E-10 | 5066.38 | 10734.5 | 2.11877  |
|         |             |         |         |          | 0.00735781  | 2479.88 | 627.575 | -3.95152 |
|         |             |         |         |          | 0.00293414  | 2208.38 | 722.325 | -3.05731 |
|         |             |         |         |          | 9.20348E-06 | 2111.05 | 493.575 | -4.27706 |
|         |             |         |         |          | 1.75065E-08 | 7085.28 | 16007   | 2.25919  |
|         |             |         |         |          | 1.79396E-05 | 6862.63 | 17161.8 | 2.50076  |
|         |             |         |         |          | 1.4305E-06  | 5632.95 | 15954.8 | 2.8324   |
|         |             |         |         |          | 8.04787E-08 | 1504.97 | 7890.45 | 5.24294  |
| -2.3009 |             |         |         |          | 9.91209E-12 | 2633.4  | 850.725 | -3.09548 |
|         | 0.00225535  | 514.467 | 164.5   | -3.12746 | 0.00690046  | 975.4   | 425.25  | -2.29371 |
|         | 2.52057E-06 | 1219.13 | 2490.15 | 2.04257  | 1.28425E-07 | 1495.5  | 3314.08 | 2.21603  |
|         |             |         |         |          | 1.13108E-06 | #DIV/0! | 2861.08 | #DIV/0!  |
|         |             |         |         |          | 7.05561E-07 | 4409.5  | #DIV/0! | #DIV/0!  |
|         |             |         |         |          | 0.000137673 | 1811.98 | 662.8   | -2.73382 |
| -2.5209 | 1.11573E-10 | 2311.23 | 565.65  | -4.08596 | 9.98894E-07 | 3810.53 | 1553.43 | -2.45298 |
|         |             |         |         |          | 2.56121E-05 | 2106.2  | 828.7   | -2.54157 |
|         |             |         |         |          | 2.98454E-07 | 3038.3  | 6578.48 | 2.16518  |
|         |             |         |         |          | 2.38931E-05 | 1494.6  | 644.6   | -2.31865 |
|         |             |         |         |          | 0.00597868  | 859.625 | 267.6   | -3.21235 |
|         |             |         |         |          | 1.63904E-05 | 3567.1  | 885.067 | -4.03032 |
|         | 0.00560167  | 990.9   | #DIV/0! | #DIV/0!  | 0.00289212  | 2115.85 | 681.333 | -3.10545 |
|         |             |         |         |          | 0.00573032  | 2057.3  | #DIV/0! | #DIV/0!  |
|         |             |         |         |          | 6.41593E-07 | 2571.2  | 6294.98 | 2.44826  |
|         | 0.000640855 | #DIV/0! | 1462.77 | #DIV/0!  | 2.47823E-07 | #DIV/0! | 1454.57 | #DIV/0!  |
|         |             |         |         |          | 2.81656E-11 | #DIV/0! | 3451.38 | #DIV/0!  |
|         |             |         |         |          | 0.00319595  | 1621.93 | 622.933 | -2.6037  |
|         |             |         |         |          | 0.00879618  | 955.2   | #DIV/0! | #DIV/0!  |
|         |             |         |         |          | 0.0164193   | 2233.8  | 591.8   | -3.77459 |
|         |             |         |         |          | 8.78329E-05 | 1453.1  | 648.95  | -2.23916 |
|         | 2.27793E-09 | 3491.73 | 1167.1  | -2.9918  | 1.71812E-11 | 4990.6  | 1389.2  | -3.59243 |
|         | 0.0121801   | 950.25  | 380.767 | -2.49562 | 0.00128636  | 2485.63 | 633.5   | -3.92364 |
|         |             |         |         |          | 2.85949E-05 | 2547.4  | 5961.78 | 2.34034  |
|         |             |         |         |          | 0.00969254  | 960.975 | 448.9   | -2.14073 |
|         |             |         |         |          | 9.18767E-05 | 2889.18 | 610.75  | -4.73054 |
|         | 0.000173177 | 6195.18 | 2421.03 | -2.55891 | 0.000542327 | 1176.95 | 374.5   | -3.14272 |
| -2.2325 |             |         |         |          | 7.35865E-11 | 6837.08 | 16612.9 | 2.42982  |
|         |             |         |         |          | 1.36655E-05 | 1257.07 | 2917.58 | 2.32094  |
|         |             |         |         |          | 0.00795646  | 1196.3  | 456.95  | -2.61801 |
| -2.468  | 0.00554923  | 637.95  | 278.025 | -2.29458 |             |         |         |          |
|         | 5.7692E-06  | 6424.5  | 2693.05 | -2.38559 |             |         |         |          |
|         | 9.39107E-06 | 1375.45 | 597.45  | -2.3022  |             |         |         |          |
| -2.0844 | 8.67772E-06 | 1719.48 | 770.8   | -2.23077 |             |         |         |          |
|         |             |         |         |          | 0.000045892 | 838.867 | 341.2   | -2.45858 |
|         | 0.000831356 | 1303.4  | 441.3   | -2.95355 |             |         |         |          |
| 3.84624 | 4.01215E-07 | 1198.3  | 4201.3  | 3.50605  | 5.01047E-08 | 11365.8 | 23632.8 | 2.07929  |
| 3.70071 | 9.64347E-09 | 990.475 | 3396.65 | 3.42931  | 6.48363E-06 | 2028.55 | 4627.58 | 2.28122  |
| 7.51002 | 1.25886E-15 | 1241.9  | 13052.1 | 10.5097  | 1.64449E-08 | 1703.33 | 5286.03 | 3.10336  |
|         |             |         |         |          | 1.62427E-18 | 1474.35 | 24474.6 | 16.6002  |
|         |             |         |         |          | 1.93992E-07 | 1958.47 | 4417.35 | 2.25551  |
|         | 1.26473E-07 | 3711.9  | 11849.4 | 3.19226  | 4.51687E-05 | 2865.7  | 6729.63 | 2.34834  |

|         |             |         |         |          |             |         |         |          |
|---------|-------------|---------|---------|----------|-------------|---------|---------|----------|
| 2.01493 | 1.5368E-08  | 1546.78 | 5379.25 | 3.47772  | 3.06455E-07 | 1042.5  | 3116.45 | 2.9894   |
|         | 1.62924E-10 | 23256.8 | 54871.1 | 2.35936  | 9.70988E-14 | 11505.5 | 35064.1 | 3.04759  |
| 2.15214 | 3.55522E-09 | 2962.53 | 10658   | 3.5976   | 1.941E-09   | 1873.15 | 7019.58 | 3.74747  |
|         |             |         |         |          | 1.2523E-06  | 4367.73 | 10275.8 | 2.35267  |
|         | 2.79881E-05 | 18175.8 | 45123   | 2.48259  | 8.27547E-08 | 9111.9  | 27541   | 3.02253  |
|         | 9.84343E-06 | 1854.3  | #DIV/0! | #DIV/0!  |             |         |         |          |
|         |             |         |         |          | 0.0004486   | 808.15  | 322.8   | -2.50356 |
|         | 0.00313862  | 664.05  | 303.7   | -2.18653 | 0.0160933   | 1072.35 | 516     | -2.0782  |
|         | 1.08113E-06 | 2097.05 | 10015.1 | 4.77578  | 1.63227E-12 | #DIV/0! | 5606.08 | #DIV/0!  |
|         | 9.09404E-05 | #DIV/0! | 3094.7  | #DIV/0!  | 2.66873E-07 | #DIV/0! | 1754.03 | #DIV/0!  |
| 2.79903 | 2.88445E-05 | 1088.55 | 3430.25 | 3.15121  |             |         |         |          |
| 2.44358 | 1.97542E-07 | 2537.57 | 8605.4  | 3.3912   |             |         |         |          |
|         | 0.000058883 | #DIV/0! | 772.167 | #DIV/0!  |             |         |         |          |
|         | 0.000159606 | 1454.3  | 707.975 | -2.05417 | 9.98264E-11 | 3757.73 | 871.9   | -4.30981 |
|         |             |         |         |          | 4.88954E-14 | 14128.6 | 59267   | 4.19482  |
|         |             |         |         |          | 5.61613E-19 | 16918.9 | 82186.5 | 4.85767  |
|         | 9.6069E-07  | 10254.3 | 20965.7 | 2.04459  | 1.77834E-17 | 3590.03 | 23210.8 | 6.46535  |
|         |             |         |         |          | 9.26391E-06 | 1631.33 | 3899.4  | 2.39033  |
|         |             |         |         |          | 0.000163522 | #DIV/0! | 1375.48 | #DIV/0!  |
| -3.3904 | 1.43305E-10 | 2330.83 | 407.367 | -5.72169 |             |         |         |          |
| -2.6734 | 2.5497E-11  | 2611.65 | 615.167 | -4.24543 |             |         |         |          |
|         |             |         |         |          | 6.47373E-07 | 1713.67 | #DIV/0! | #DIV/0!  |
|         |             |         |         |          | 2.6981E-08  | 3779.73 | 789.825 | -4.78552 |
|         | 0.000110557 | 1676.87 | 590     | -2.84215 | 9.4115E-08  | 4318.43 | 975.867 | -4.42522 |
|         | 3.74906E-05 | 1530.88 | 607.867 | -2.51844 | 6.64932E-09 | 3997.7  | 920.45  | -4.3432  |
|         |             |         |         |          | 5.17045E-06 | 3705.55 | 1047.2  | -3.53853 |
|         |             |         |         |          | 0.000046915 | 1374.9  | 652.967 | -2.10562 |
|         |             |         |         |          | 0.000134625 | 1780.53 | 550     | -3.23733 |
|         |             |         |         |          | 0.00102999  | 1291    | 392.5   | -3.28917 |
|         |             |         |         |          | 0.00143098  | 1672.77 | #DIV/0! | #DIV/0!  |
|         | 0.00466747  | 801.767 | #DIV/0! | #DIV/0!  |             |         |         |          |
|         |             |         |         |          | 2.56696E-09 | 12618.9 | 25282.3 | 2.00352  |
|         |             |         |         |          | 3.33226E-11 | 11489.8 | 23620   | 2.05573  |
| -3.3757 | 1.32445E-07 | 8528.03 | 2954.78 | -2.88618 |             |         |         |          |
| -2.5519 | 0.000316251 | 2731.2  | #DIV/0! | #DIV/0!  |             |         |         |          |
| -2.05   | 1.61775E-05 | 2613.53 | 1123.28 | -2.3267  |             |         |         |          |
|         |             |         |         |          | 2.14815E-05 | 3743.7  | 1688.53 | -2.21713 |
|         | 0.00129779  | 1325.9  | 396.467 | -3.34429 | 0.00139506  | 4007.43 | 830.5   | -4.82532 |
| -2.3954 | 5.54789E-08 | 7004.8  | 17743.2 | 2.533    |             |         |         |          |
|         |             |         |         |          | 3.08663E-14 | 2753.08 | 13290.7 | 4.82757  |
|         |             |         |         |          | 0.000746128 | #DIV/0! | 1454.03 | #DIV/0!  |
| 4.1664  | 5.64235E-08 | 1340.05 | 11701.6 | 8.73221  | 1.64418E-14 | #DIV/0! | 14753.5 | #DIV/0!  |
|         |             |         |         |          | 1.38485E-05 | #DIV/0! | 1832.33 | #DIV/0!  |
| 2.64172 | 8.83272E-14 | 5338.75 | 20570.3 | 3.85302  | 5.68464E-15 | 3727.58 | 15828.3 | 4.24628  |
| 2.02821 | 1.43578E-06 | 1051.2  | 3479.88 | 3.31038  | 0.000011302 | #DIV/0! | 4047.38 | #DIV/0!  |
| 3.11395 | 4.10774E-06 | 1673.8  | 7479.85 | 4.46878  | 1.11305E-11 | #DIV/0! | 5985.03 | #DIV/0!  |
|         |             |         |         |          | 1.90533E-17 | 1588.93 | 6399.85 | 4.02779  |
| -2.2228 | 1.83805E-08 | 2969.5  | 1161.05 | -2.5576  |             |         |         |          |
| #DIV/0! | 9.80312E-05 | 2843.7  | 1379.5  | -2.0614  |             |         |         |          |
| 2.02185 | 0.00423213  | 1666.18 | 3556.68 | 2.13463  | 0.000650937 | 1443    | 3247.15 | 2.25028  |
| 2.33647 | 0.000341042 | 2632.08 | 5756.73 | 2.18714  | 1.58938E-07 | 2954.35 | 9567.13 | 3.23832  |
|         | 0.00667008  | #DIV/0! | 3454.48 | #DIV/0!  | 1.10358E-07 | #DIV/0! | 6065.68 | #DIV/0!  |
|         |             |         |         |          | 5.93997E-06 | #DIV/0! | 4969.95 | #DIV/0!  |
|         |             |         |         |          | 2.62082E-10 | 5130.9  | 13563.8 | 2.64354  |
|         | 0.00044795  | 966.467 | 420     | -2.30111 |             |         |         |          |
| -2.1315 | 3.16974E-06 | 28844.2 | 13698.5 | -2.10565 |             |         |         |          |
| -3.1352 |             |         |         |          |             |         |         |          |
| -2.9051 |             |         |         |          |             |         |         |          |
| -2.5244 |             |         |         |          |             |         |         |          |
|         | 0.0071241   | 707.333 | #DIV/0! | #DIV/0!  |             |         |         |          |
| -2.0602 |             |         |         |          |             |         |         |          |
|         |             |         |         |          | 6.68936E-11 | 2649.03 | 854.95  | -3.09847 |

|         |             |         |         |          |             |         |         |          |
|---------|-------------|---------|---------|----------|-------------|---------|---------|----------|
|         | 0.00369178  | 703     | #DIV/0! | #DIV/0!  |             |         |         |          |
|         | 0.00683584  | 505.267 | #DIV/0! | #DIV/0!  | 0.0206128   | 1110.83 | 446.25  | -2.48924 |
|         |             |         |         |          | 8.85804E-05 | 1830.4  | 533.2   | -3.43286 |
|         | 3.92512E-06 | 8182.95 | 3268.53 | -2.50356 |             |         |         |          |
|         |             |         |         |          | 0.000025959 | 1226.15 | 231     | -5.30801 |
|         | 0.000303325 | 1258.8  | 454.167 | -2.77167 | 1.45709E-05 | 3411.4  | 754.8   | -4.51961 |
|         |             |         |         |          | 3.10465E-05 | 1245.45 | 455.333 | -2.73525 |
| 2.84662 | 0.00229768  | 1462.43 | 674.6   | -2.16784 | 1.86706E-05 | 3444.68 | 1108.48 | -3.10758 |
|         |             |         |         |          |             |         |         |          |
|         |             |         |         |          | 6.10109E-10 | 4511.7  | 10486   | 2.32417  |
|         |             |         |         |          | 8.92486E-09 | 13828.5 | 29844.5 | 2.15819  |
|         | 0.000414181 | 1718.1  | 800.7   | -2.14575 |             |         |         |          |
|         |             |         |         |          | 0.00163262  | 1399.93 | 546.05  | -2.56373 |
|         |             |         |         |          | 0.000137292 | 1472.13 | #DIV/0! | #DIV/0!  |
|         |             |         |         |          | 0.000170289 | 2446.8  | 662.3   | -3.6944  |
|         | 7.19248E-06 | 1331.93 | 527     | -2.52737 | 4.5802E-07  | 2412.13 | 695.6   | -3.46769 |
|         |             |         |         |          | 3.1172E-07  | 1308.23 | 468.25  | -2.79386 |
|         |             |         |         |          |             |         |         |          |
|         | 9.70538E-05 | 929.8   | 420.333 | -2.21205 |             |         |         |          |
|         | 0.00150655  | 2205.2  | 849.625 | -2.5955  | 0.000011785 | 5105.65 | 1129.93 | -4.51857 |
|         | 0.00102022  | 1181.35 | 308.7   | -3.82685 | 0.000134049 | 3340.4  | 846.55  | -3.9459  |
|         |             |         |         |          | 6.50606E-05 | 2758.6  | 732.2   | -3.76755 |
|         |             |         |         |          | 0.00232852  | 1856.63 | 539.45  | -3.4417  |
|         |             |         |         |          | 2.88879E-05 | 4415.65 | #DIV/0! | #DIV/0!  |
|         |             |         |         |          | 0.00287322  | 2267.93 | #DIV/0! | #DIV/0!  |
|         | 2.69798E-07 | 8338.45 | 3252.75 | -2.56351 | 4.7591E-10  | 19937.6 | 5258.5  | -3.7915  |
|         |             |         |         |          | 2.36815E-08 | #DIV/0! | 1115.87 | #DIV/0!  |
|         |             |         |         |          | 1.36145E-07 | 9860.6  | 23263.2 | 2.35921  |
|         |             |         |         |          | 5.90775E-09 | 1816.35 | #DIV/0! | #DIV/0!  |
|         | 4.52047E-13 | 3302.75 | 679.775 | -4.85859 | 4.65234E-18 | 8511.43 | 941.133 | -9.0438  |
|         | 0.000891592 | 901.2   | 337.867 | -2.66732 |             |         |         |          |
|         | 8.83925E-05 | 833.85  | 319.5   | -2.60986 | 0.000228832 | 1536.78 | 434.1   | -3.54014 |
|         |             |         |         |          | 3.39044E-05 | 1335.65 | 3194.43 | 2.39166  |
|         | 0.0156438   | 936.1   | 1963.8  | 2.09785  | 7.42421E-07 | #DIV/0! | 1465.58 | #DIV/0!  |
|         | 0.000284192 | 1377.25 | 3362.6  | 2.44153  | 3.69811E-08 | #DIV/0! | 2660.38 | #DIV/0!  |
|         |             |         |         |          | 0.0046865   | 1002.47 | 452.2   | -2.21687 |
|         | 0.0033962   | 795.733 | #DIV/0! | #DIV/0!  | 0.000380504 | 1554.47 | #DIV/0! | #DIV/0!  |
|         |             |         |         |          | 0.000327406 | 2559.47 | #DIV/0! | #DIV/0!  |
|         |             |         |         |          | 0.005378    | 1145.73 | 278.55  | -4.11318 |
| #DIV/0! |             |         |         |          |             |         |         |          |
|         |             |         |         |          | 8.33354E-11 | 13983.8 | 39857.9 | 2.8503   |
|         | 0.000602866 | 2390.08 | 738.375 | -3.23694 | 0.0034626   | 2185.3  | 918.1   | -2.38024 |
|         |             |         |         |          | 1.25174E-10 | 3234.5  | 1092.35 | -2.96105 |
|         |             |         |         |          | 8.23092E-09 | 2961.8  | 1180.75 | -2.50841 |
|         |             |         |         |          | 0.00396027  | #DIV/0! | 992.333 | #DIV/0!  |
|         |             |         |         |          | 6.90066E-06 | 3845.2  | 8269.7  | 2.15066  |
| 3.45618 |             |         |         |          |             |         |         |          |
|         | 4.32987E-05 | 3159.88 | 8956.25 | 2.83437  | 0.000296304 | 2525.85 | 5592.33 | 2.21404  |
|         | 0.000384565 | 1000.97 | 323.5   | -3.09418 |             |         |         |          |
|         |             |         |         |          | 0.00118419  | 1122.53 | 362.133 | -3.09976 |
|         |             |         |         |          | 0.000691676 | 800.4   | #DIV/0! | #DIV/0!  |
|         |             |         |         |          | 0.00054702  | 6221.58 | 2521.45 | -2.46746 |
|         |             |         |         |          | 0.000011671 | 1699.87 | 681.7   | -2.49357 |
|         |             |         |         |          | 1.20442E-05 | 1067.9  | 491.467 | -2.17288 |
| -2.4846 | 0.000120375 | 1364.18 | 578.35  | -2.35874 |             |         |         |          |
|         | 4.13489E-08 | 7154.38 | 25737.5 | 3.59745  | 1.64398E-07 | 3270.95 | 9666.03 | 2.95511  |
|         | 7.52928E-08 | #DIV/0! | 3655.93 | #DIV/0!  | 9.64146E-07 | #DIV/0! | 1785.63 | #DIV/0!  |
|         | 4.07576E-05 | 563.225 | 1410.13 | 2.50366  |             |         |         |          |
| 2.18922 | 4.66756E-06 | 1652.35 | 5439.8  | 3.29216  |             |         |         |          |
|         |             |         |         |          | 5.80726E-10 | 5792.68 | 15033.9 | 2.59533  |
|         |             |         |         |          | 1.21626E-07 | #DIV/0! | 2009.3  | #DIV/0!  |
|         | 2.6231E-06  | 4939.15 | 10570   | 2.14005  | 5.72949E-10 | 3942.1  | 10381.1 | 2.63339  |
|         |             |         |         |          | 0.00162405  | 1816.28 | 500.7   | -3.62747 |
|         |             |         |         |          | 0.00169451  | 846.6   | 254.4   | -3.32783 |

|         |             |         |         |          |             |         |         |          |
|---------|-------------|---------|---------|----------|-------------|---------|---------|----------|
|         |             |         |         |          | 0.00269737  | 2198.25 | 878.1   | -2.50342 |
|         |             |         |         |          | 0.00236566  | 1022.63 | 298.2   | -3.42935 |
|         | 3.68967E-06 | 436.4   | 3878.23 | 8.88686  | 0.00600191  | 844.7   | 2407.43 | 2.85004  |
| 8.46561 | 3.44198E-09 | 2597.1  | 26642.1 | 10.2584  | 2.0785E-06  | 4156.33 | 21288.6 | 5.12197  |
| 7.60554 | 4.81948E-09 | 3152.28 | 29335   | 9.30597  | 7.67024E-07 | 3897.73 | 20684.7 | 5.30687  |
| 3.70021 |             |         |         |          |             |         |         |          |
| -2.0712 | 3.3374E-11  | 2211.03 | 493.425 | -4.48097 | 1.0417E-09  | 2489.93 | 638.725 | -3.89827 |
|         |             |         |         |          | 1.01092E-08 | 5452.53 | 14957.6 | 2.74324  |
| 4.24403 | 3.28678E-08 | 1617.65 | 4825.58 | 2.98308  | 3.44774E-08 | 2297.27 | 5158.35 | 2.24543  |
|         | 1.05735E-11 | 15390.7 | 42214.6 | 2.74286  | 2.32486E-17 | 10986.2 | 49867.7 | 4.53912  |
| 2.66983 | 9.51855E-08 | 1808.3  | 6460.7  | 3.5728   | 1.40113E-06 | #DIV/0! | 4952.05 | #DIV/0!  |
| -2.1717 |             |         |         |          |             |         |         |          |
|         |             |         |         |          | 0.000476619 | 3676.35 | 1657.9  | -2.21747 |
|         | 2.72038E-05 | 7567.85 | 22206.3 | 2.93429  | 2.24915E-12 | 2571.28 | 20168.1 | 7.84361  |
| 3.02312 | 1.47032E-06 | 3538.58 | 22471.1 | 6.35033  | 8.6188E-10  | 2441.1  | 20301.9 | 8.31668  |
|         |             |         |         |          | 9.30455E-05 | 1397.03 | 417.7   | -3.34457 |
|         | 0.0152638   | 2035.15 | 902.9   | -2.25401 |             |         |         |          |
| -2.0588 |             |         |         |          |             |         |         |          |
|         |             |         |         |          | 0.0019201   | 1605.6  | 566.55  | -2.834   |
|         |             |         |         |          | 5.08888E-07 | 1738.6  | 4023.23 | 2.31406  |
|         | 7.78162E-06 | 963.75  | #DIV/0! | #DIV/0!  |             |         |         |          |
| 4.76741 | 3.99131E-06 | 1306.73 | 5480.2  | 4.19382  | 0.00246227  | 1947.37 | 4327    | 2.22197  |
|         |             |         |         |          | 4.37877E-07 | 2946.78 | 14155.2 | 4.80362  |
|         | 0.00153708  | 3896.13 | 10715.1 | 2.7502   | 1.51762E-07 | 1356.3  | 7220.85 | 5.32393  |
|         |             |         |         |          | 0.00060567  | #DIV/0! | 1712.5  | #DIV/0!  |
|         |             |         |         |          | 0.000953841 | 1115.83 | 429.3   | -2.59917 |
|         | 8.84606E-07 | 1234.4  | 467.8   | -2.63873 | 5.01817E-08 | 1666.88 | 554.133 | -3.00808 |
| 3.6575  |             |         |         |          |             |         |         |          |
| -2.3848 |             |         |         |          |             |         |         |          |
|         |             |         |         |          | 2.58202E-06 | #DIV/0! | 1259.08 | #DIV/0!  |
|         |             |         |         |          | 0.00187775  | 2440.73 | 616.95  | -3.95611 |
|         | 0.00121047  | 930.85  | 335.825 | -2.77183 | 0.000444911 | 2748.08 | 887.2   | -3.09747 |
|         |             |         |         |          | 0.00460419  | 2303.3  | 772.05  | -2.98336 |
|         | 8.02139E-07 | 4685.28 | 1943.08 | -2.41127 | 7.21945E-10 | 7317.05 | 2305.9  | -3.17319 |
|         |             |         |         |          | 0.000347445 | 1092.97 | #DIV/0! | #DIV/0!  |
|         |             |         |         |          | 0.000743498 | #DIV/0! | 2583.78 | #DIV/0!  |
|         | 6.40609E-05 | 3483.83 | 1696.58 | -2.05345 |             |         |         |          |
| 2.7606  |             |         |         |          |             |         |         |          |
| 2.97158 |             |         |         |          |             |         |         |          |
|         |             |         |         |          | 4.2142E-07  | 2444.23 | 982.8   | -2.487   |
|         |             |         |         |          | 1.11382E-07 | 1405.03 | 570.075 | -2.46463 |
| 2.45869 |             |         |         |          |             |         |         |          |
|         |             |         |         |          | 5.01019E-05 | #DIV/0! | 1651.9  | #DIV/0!  |
| 6.29644 | 0.000024269 | 2685.93 | 15498.8 | 5.77039  |             |         |         |          |
|         |             |         |         |          | 0.0218709   | #DIV/0! | 1267.97 | #DIV/0!  |
|         | 0.000106171 | 642.433 | 186.05  | -3.45301 |             |         |         |          |
| -3.3374 | 8.31667E-06 | 2746.58 | 877.1   | -3.13143 |             |         |         |          |
|         |             |         |         |          | 0.000068274 | 6613.35 | 1216.08 | -5.43827 |
|         |             |         |         |          | 0.00360192  | 5159.68 | 1280.45 | -4.02958 |
|         |             |         |         |          | 1.54522E-05 | 1462.23 | 650.275 | -2.24864 |
|         | 0.000147578 | 511.05  | 171.1   | -2.98685 | 0.00113486  | 1120.53 | 359.9   | -3.11346 |
|         | 0.000132265 | 1434.65 | 626.5   | -2.28994 | 1.9086E-06  | 2445.7  | 817.95  | -2.99004 |
|         | 0.00020646  | 1734.9  | 3712.93 | 2.14014  | 2.64472E-06 | #DIV/0! | 2862.05 | #DIV/0!  |
|         | 3.98298E-05 | 1163.05 | 478.925 | -2.42846 |             |         |         |          |
|         | 0.00164714  | 2468.05 | 864.2   | -2.85588 | 0.00120262  | 4928.25 | 1795.95 | -2.74409 |
|         |             |         |         |          | 3.87819E-08 | 3052.75 | 7337.18 | 2.40346  |
|         |             |         |         |          |             |         |         |          |
|         |             |         |         |          | 0.0014021   | 3906.15 | 1653.4  | -2.3625  |
|         |             |         |         |          | 5.4566E-07  | 2787.38 | 5669.8  | 2.0341   |
|         |             |         |         |          | 4.41964E-05 | 703.15  | 267.3   | -2.63056 |
|         | 0.00211547  | #DIV/0! | 1073.2  | #DIV/0!  |             |         |         |          |
| -3.0571 | 3.00011E-05 | 761.4   | 251.25  | -3.03045 |             |         |         |          |

|             |         |         |          |             |         |         |          |
|-------------|---------|---------|----------|-------------|---------|---------|----------|
|             |         |         |          | 0.000186339 | 1932.83 | 9679.13 | 5.00774  |
| 0.00142468  | #DIV/0! | 14195.3 | #DIV/0!  | 8.04245E-05 | 3720.4  | 19505.8 | 5.24292  |
| 5.47948E-05 | 1043.35 | 454.425 | -2.29598 | 5.98869E-09 | 1848.7  | 483.35  | -3.82476 |
|             |         |         |          | 2.05633E-09 | 2408.6  | 5548.73 | 2.30371  |
| 2.41058E-08 | 2594.6  | 9889.5  | 3.81157  | 3.50958E-10 | 2067.2  | 7660.88 | 3.70592  |
| 2.6793E-07  | 2821.1  | 7782.95 | 2.75884  | 2.70637E-10 | 1634.18 | 6459.83 | 3.95296  |
|             |         |         |          | 4.49081E-11 | #DIV/0! | 5513.43 | #DIV/0!  |
|             |         |         |          | 3.33194E-06 | 2306.33 | 764.25  | -3.01776 |
|             |         |         |          | 0.000166268 | 1468.33 | 696.575 | -2.10792 |
|             |         |         |          | 1.11459E-05 | 2432.3  | 5072.78 | 2.08559  |
| 0.00104024  | 2122.68 | 722.625 | -2.93745 |             |         |         |          |
| 0.000761063 | 1104.78 | 548.833 | -2.01295 |             |         |         |          |
|             |         |         |          | 7.85913E-14 | 11138.7 | 62110.3 | 5.57607  |
|             |         |         |          | 0.000145406 | #DIV/0! | 1972.08 | #DIV/0!  |
|             |         |         |          | 0.00929554  | 1860    | 897     | -2.07358 |
|             |         |         |          | 7.18332E-06 | 5694.33 | 12206.9 | 2.14369  |
|             |         |         |          | 2.80553E-13 | 3681.18 | 8834.3  | 2.39986  |
|             |         |         |          | 0.00581723  | 1418.85 | #DIV/0! | #DIV/0!  |
|             |         |         |          | 1.047E-07   | 4635.53 | 2244.9  | -2.06491 |
| 7.16032E-06 | 2242.33 | 1087.8  | -2.06134 |             |         |         |          |
|             |         |         |          | 2.5005E-07  | 1415.6  | 3791.63 | 2.67846  |
|             |         |         |          | 2.24923E-05 | 1988.93 | 680.225 | -2.92392 |
|             |         |         |          | 2.50435E-11 | 4025.85 | 12283.4 | 3.05113  |
|             |         |         |          | 4.79911E-14 | 7037.23 | 24987.3 | 3.55073  |
|             |         |         |          | 7.24335E-12 | 4416.05 | 17376.5 | 3.93485  |
|             |         |         |          | 3.54436E-13 | 16369.4 | 48188.3 | 2.9438   |
|             |         |         |          | 2.93669E-12 | 13950.2 | 46016.8 | 3.29864  |
|             |         |         |          | 9.5051E-06  | 3237.03 | 1611.8  | -2.00833 |
|             |         |         |          | 0.00430361  | 921.775 | 256.5   | -3.59366 |
|             |         |         |          | 3.3557E-08  | 2462.83 | 5939.48 | 2.41165  |
|             |         |         |          | 2.14248E-12 | 2711.5  | 10359.4 | 3.82052  |
|             |         |         |          | 5.1278E-09  | 3968.6  | 10935.3 | 2.75546  |
|             |         |         |          | 4.81732E-06 | 2097.28 | 5460.88 | 2.6038   |
|             |         |         |          | 0.00383051  | #DIV/0! | 1595.08 | #DIV/0!  |
| 8.91069E-07 | 7293.68 | 18770.8 | 2.57357  | 7.90612E-12 | 6080.5  | 28624.4 | 4.70757  |
| 1.44013E-09 | 4116.85 | 19376.5 | 4.70663  | 6.67664E-14 | 3534    | 27720.8 | 7.84402  |
|             |         |         |          | 1.79197E-15 | 8894.68 | 44406.5 | 4.99248  |
|             |         |         |          | 4.72925E-12 | 893.4   | 9351.38 | 10.4672  |
| 0.000261135 | 2465.98 | 6798.88 | 2.75707  |             |         |         |          |
|             |         |         |          | 0.000147118 | 1483.48 | 655.7   | -2.26243 |
|             |         |         |          | 0.000448531 | #DIV/0! | 1740    | #DIV/0!  |
|             |         |         |          | 4.76866E-12 | 8109.98 | 32995.1 | 4.06846  |
| 0.000296519 | 3240.23 | 6591.6  | 2.0343   |             |         |         |          |
| 4.53551E-07 | 2510.9  | 7829.78 | 3.11831  | 1.8923E-08  | 2176.75 | 7623.95 | 3.50245  |
| 0.000126531 | 3755.53 | 8436.6  | 2.24645  | 7.36411E-11 | 2027.2  | 8931.68 | 4.40592  |
|             |         |         |          | 2.02887E-07 | #DIV/0! | 7345.48 | #DIV/0!  |
|             |         |         |          | 0.00274427  | 888.725 | 396.95  | -2.23888 |
|             |         |         |          | 0.0137423   | 1079.8  | 255.467 | -4.22677 |
|             |         |         |          | 0.00235134  | 1094    | 312.8   | -3.49744 |
|             |         |         |          | 0.000020291 | #DIV/0! | 3744.38 | #DIV/0!  |
|             |         |         |          | 2.79794E-09 | 5679.6  | 18369.2 | 3.23423  |
|             |         |         |          | 3.64458E-06 | 1797.4  | 542.633 | -3.31237 |
|             |         |         |          | 1.53956E-11 | 2536.27 | 5692.95 | 2.24462  |
| 7.61735E-05 | 1330.25 | 599.675 | -2.21828 | 1.91153E-06 | 1910.6  | 712.2   | -2.68267 |
| 8.87163E-08 | 2066    | 4803.75 | 2.32515  | 0.00130148  | #DIV/0! | 2639.73 | #DIV/0!  |
|             |         |         |          | 0.00884057  | 2397.83 | 678.933 | -3.53175 |
|             |         |         |          | 2.57073E-05 | 1690.23 | 455.3   | -3.71233 |
| 4.16168E-08 | 27558.6 | 91066.3 | 3.30446  | 4.65911E-16 | 11376.9 | 105463  | 9.26999  |
|             |         |         |          | 0.000175852 | 1518.93 | 752.75  | -2.01785 |
|             |         |         |          | 0.000465608 | 2823.45 | 5708.75 | 2.02191  |

|         |             |         |         |          |             |         |         |          |
|---------|-------------|---------|---------|----------|-------------|---------|---------|----------|
| -2.543  | 7.67405E-05 | 1919.58 | 834.575 | -2.30006 | 0.000115277 | 1784.78 | 846.425 | -2.1086  |
|         | 3.77079E-05 | 737.825 | 303.275 | -2.43286 | 6.03773E-05 | 1249.7  | 446.3   | -2.80013 |
|         | 0.00608097  | 658.7   | 326.433 | -2.01787 |             |         |         |          |
| -2.9672 |             |         |         |          |             |         |         |          |
|         | 2.80041E-08 | 2154.73 | #DIV/0! | #DIV/0!  | 4.3982E-13  | 5020.25 | 1334.6  | -3.76161 |
|         |             |         |         |          | 0.00106104  | 1451.7  | 518.55  | -2.79954 |
|         |             |         |         |          | 0.00278221  | 1622.37 | 757.733 | -2.14108 |
| -2.7989 |             |         |         |          |             |         |         |          |
| -2.5824 |             |         |         |          |             |         |         |          |
|         |             |         |         |          | 1.62224E-12 | 8415.8  | 19978.6 | 2.37394  |
|         |             |         |         |          | 4.15065E-13 | 1391.83 | 338.3   | -4.11417 |
|         | 1.39742E-05 | 1711.9  | 827.575 | -2.06857 | 3.67945E-09 | 2272.4  | 820.267 | -2.77032 |
|         |             |         |         |          | 0.0012045   | #DIV/0! | 955.025 | #DIV/0!  |
|         | 1.55572E-06 | 3433.55 | 1525.03 | -2.25147 |             |         |         |          |
|         | 4.40658E-05 | 1033.83 | 462.675 | -2.23445 |             |         |         |          |
|         | 0.00580314  | 924.2   | 356.167 | -2.59485 |             |         |         |          |
| 3.44503 | 3.87344E-05 | #DIV/0! | 3525.63 | #DIV/0!  | 3.86089E-05 | 1227.1  | 2978.3  | 2.4271   |
|         | 4.27734E-05 | 1082.9  | 409.4   | -2.64509 | 3.72267E-05 | 1750.67 | 663.475 | -2.63863 |
| -2.6199 |             |         |         |          | 8.97767E-06 | 4761.7  | 2297.88 | -2.07222 |
|         |             |         |         |          | 0.00265349  | 1311.57 | 466.467 | -2.81171 |
|         |             |         |         |          | 0.000043402 | 7156.25 | 1874.68 | -3.81733 |
|         |             |         |         |          | 9.10309E-07 | 2528.78 | 910.133 | -2.77847 |
|         | 0.0030765   | 1673.2  | 746.8   | -2.24049 |             |         |         |          |
| #DIV/0! |             |         |         |          |             |         |         |          |
|         |             |         |         |          | 0.000120534 | 1300.18 | 476.1   | -2.73089 |
|         |             |         |         |          | 5.88949E-09 | 2690.23 | 6486.43 | 2.41111  |
|         |             |         |         |          | 0.000266189 | 1623.97 | #DIV/0! | #DIV/0!  |
|         |             |         |         |          | 0.012975    | 1252.25 | #DIV/0! | #DIV/0!  |
|         |             |         |         |          | 0.00112492  | 795.667 | 233.667 | -3.40514 |
|         | 0.00171491  | 672.2   | 220.6   | -3.04714 | 0.000366573 | 1005.17 | #DIV/0! | #DIV/0!  |
|         | 0.000351432 | 1059.23 | #DIV/0! | #DIV/0!  |             |         |         |          |
| -2.6295 | 0.000225645 | 6544.25 | 2902.53 | -2.25467 | 3.69461E-10 | 9116    | 24961.6 | 2.73822  |
|         |             |         |         |          | 2.2498E-06  | 1342.18 | 590.525 | -2.27285 |
|         |             |         |         |          | 2.25242E-13 | 13649.2 | 37591.8 | 2.75414  |
|         |             |         |         |          | 1.8025E-07  | 4232.95 | 8683.3  | 2.05136  |
|         |             |         |         |          | 1.5557E-06  | 4502.08 | 911.1   | -4.94136 |
|         |             |         |         |          | 1.39134E-06 | 2384.05 | 602.633 | -3.95605 |
|         |             |         |         |          | 0.0181317   | 1235.33 | 572.2   | -2.1589  |
|         |             |         |         |          | 3.58878E-06 | 2882.33 | 783.85  | -3.67714 |
|         |             |         |         |          | 4.88118E-10 | 31057.3 | 89469.6 | 2.88079  |
|         |             |         |         |          | 1.41673E-05 | 1597.97 | #DIV/0! | #DIV/0!  |
| -2.6007 |             |         |         |          |             |         |         |          |
|         |             |         |         |          | 6.57548E-07 | 9150.85 | 22630   | 2.47299  |
|         |             |         |         |          | 0.000397203 | 1177.55 | 445.65  | -2.64232 |
|         | 8.80445E-05 | 680.067 | 281.4   | -2.41673 | 0.0165941   | 927.45  | 364.533 | -2.54421 |
|         | 1.75177E-07 | 2855.98 | 6186.58 | 2.16619  | 1.57603E-09 | 2726.48 | 7109.8  | 2.60769  |
|         |             |         |         |          | 1.91966E-09 | 3030.7  | 8497.88 | 2.80393  |
|         |             |         |         |          | 0.00116125  | #DIV/0! | 1095.17 | #DIV/0!  |
|         | 0.000242275 | 1132.8  | 2684.28 | 2.36959  | 0.000472864 | #DIV/0! | 3289.33 | #DIV/0!  |
|         |             |         |         |          | 0.00437901  | 1118.67 | 503.4   | -2.22222 |
|         | 6.12754E-07 | 5672.05 | 2817.87 | -2.01289 | 1.16954E-08 | 5415.8  | 2418.18 | -2.23962 |
|         | 3.16974E-10 | 2928.75 | 899.15  | -3.25724 | 1.86901E-07 | 3390.08 | 1481.53 | -2.28823 |
|         | 7.30163E-08 | 4548.45 | 10554.9 | 2.32055  | 2.02499E-14 | 1983.9  | 9219.9  | 4.64736  |
|         | 1.22776E-12 | 4291.45 | 14084.3 | 3.28194  | 3.20967E-17 | 2154.33 | 11161   | 5.18073  |
|         | 1.48784E-11 | 2652.2  | 8757.68 | 3.30204  | 9.7884E-17  | 1458.18 | 8090.33 | 5.54825  |
|         | 0.00194034  | 1212.43 | #DIV/0! | #DIV/0!  |             |         |         |          |
|         |             |         |         |          | 6.63096E-06 | 1749.73 | 577.5   | -3.02984 |
| 2.13474 | 1.8777E-09  | 947.725 | 3782.3  | 3.99093  | 1.07509E-05 | 892.75  | 1988.63 | 2.22753  |
|         | 1.88384E-10 | 6844.15 | 20845.9 | 3.0458   | 2.51149E-12 | 3714.98 | 12342.9 | 3.32246  |
| 2.72503 | 5.62895E-09 | 944.967 | 3035.88 | 3.21268  |             |         |         |          |
|         |             |         |         |          | 3.05277E-06 | 2868.05 | 853.7   | -3.35955 |
|         |             |         |         |          | 0.00124781  | 1109.13 | 352.35  | -3.14782 |

|             |             |         |          |             |             |         |          |          |  |
|-------------|-------------|---------|----------|-------------|-------------|---------|----------|----------|--|
| 0.00169013  | 762.8       | 336.7   | -2.26552 |             |             |         |          |          |  |
|             |             |         |          | 7.36845E-05 | 1473.83     | 365.925 | -4.02769 |          |  |
|             |             |         |          | 0.00030486  | 2051.1      | 885.1   | -2.31737 |          |  |
|             |             |         |          | 0.000012933 | 1661.9      | 458.733 | -3.6228  |          |  |
|             |             |         |          | 0.000177693 | 3291.93     | 1235.6  | -2.66423 |          |  |
| 4.13437E-07 | 1368.78     | 347.2   | -3.94232 | 4.79262E-09 | 3509.28     | 641.025 | -5.47447 |          |  |
|             |             |         |          | 0.00369698  | 1286.65     | 583.85  | -2.20373 |          |  |
| 0.00669612  | #DIV/0!     | 1174.18 | #DIV/0!  |             |             |         |          |          |  |
|             |             |         |          | 1.11465E-13 | 1777.28     | 3632.53 | 2.04387  |          |  |
|             |             |         |          | 0.00143979  | 1374.63     | 433.275 | -3.17264 |          |  |
|             |             |         |          | 5.28888E-09 | 15616.6     | 48196.7 | 3.08625  |          |  |
|             |             |         |          | 1.34461E-09 | 40359.8     | 130831  | 3.24163  |          |  |
|             |             |         |          | 1.86229E-09 | 16092.8     | 54822.6 | 3.40666  |          |  |
|             |             |         |          | 1.91596E-07 | 6455.03     | 25589   | 3.9642   |          |  |
|             |             |         |          | 1.03004E-12 | 11392.8     | 48994   | 4.30043  |          |  |
| 2.89744     | 7.28151E-15 | 9184    | 53422.3  | 5.81689     | 9.73486E-13 | 11026.5 | 45481    | 4.12472  |  |
| 2.94067     | 8.25477E-16 | 4823.83 | 36762.6  | 7.62105     | 1.43271E-12 | 5878.58 | 25852.5  | 4.39775  |  |
|             | 8.34542E-05 | 31844.5 | 75065.1  | 2.35724     | 0.000060957 | 29200.6 | 68602.8  | 2.34937  |  |
|             | 1.24189E-05 | 25269.5 | 74665.5  | 2.95477     | 9.44195E-06 | 22754.9 | 63826.6  | 2.80496  |  |
| 2.90642     | 1.08349E-11 | 11186.4 | 47417.5  | 4.23886     | 3.392E-13   | 10456   | 51419.2  | 4.91768  |  |
| 3.13073     | 4.72214E-11 | 12061.1 | 53372.5  | 4.42517     | 2.59024E-12 | 11684.7 | 61667.2  | 5.2776   |  |
|             |             |         |          |             | 0.00354777  | 1751.05 | 719.8    | -2.43269 |  |
| -2.6165     | 2.41663E-08 | 6797.48 | 1527.93  | -4.44883    | 1.95282E-06 | 4765.53 | 1602.8   | -2.97325 |  |
|             |             |         |          |             | 0.0180504   | 1516.47 | 731.45   | -2.07323 |  |
|             |             |         |          |             | 3.67496E-11 | 3795.58 | 12517    | 3.29779  |  |
|             |             |         |          |             | 0.000027091 | #DIV/0! | 2638     | #DIV/0!  |  |
|             |             |         |          |             | 0.000470995 | #DIV/0! | 2602.27  | #DIV/0!  |  |
|             |             |         |          |             | 6.81337E-06 | 8958.93 | 19983    | 2.23052  |  |
| -2.0264     |             |         |          |             |             |         |          |          |  |
| 2.95896     | 7.0836E-07  | #DIV/0! | 877.475  | #DIV/0!     | 0.0024039   | 708     | 1668.43  | 2.35653  |  |
|             | 1.76436E-10 | 6868.45 | 18584.7  | 2.7058      | 9.34453E-18 | 4060.65 | 22523    | 5.54666  |  |
|             | 1.51311E-07 | 34224.8 | 106424   | 3.10955     | 2.88609E-15 | 13772.8 | 104612   | 7.59556  |  |
| 2.33809     | 1.64666E-13 | 1753.33 | 5742.78  | 3.27536     | 1.8453E-14  | 1468.55 | 4997.63  | 3.4031   |  |
| 3.76075     |             |         |          |             | 0.00035913  | 1429.08 | 626.75   | -2.28014 |  |
| -2.9587     | 0.000237049 | 9759.98 | 3402.53  | -2.86845    |             |         |          |          |  |
| -2.8007     | 9.73487E-05 | 18517.8 | 6926.83  | -2.67334    |             |         |          |          |  |
| -3.3318     | 0.00316861  | 3677.35 | 1473.03  | -2.49646    |             |         |          |          |  |
|             |             |         |          |             | 0.00702114  | 1018.98 | 355.5    | -2.86632 |  |
|             |             |         |          |             | 2.7411E-06  | 2188.93 | 1022.35  | -2.14107 |  |
|             | 3.33392E-08 | 38051.7 | 10040.5  | -3.78984    | 0.000014417 | 7088.2  | 2846.28  | -2.49034 |  |
| -2.0143     | 2.31143E-10 | 38573.3 | 7999.95  | -4.82169    | 1.32009E-05 | 5996.23 | 2543.6   | -2.35738 |  |
|             | 0.00003761  | 5201.45 | 14320.6  | 2.75318     | 7.32552E-11 | 2194.33 | 12171.4  | 5.54674  |  |
|             |             |         |          |             | 0.00710886  | #DIV/0! | 2738.15  | #DIV/0!  |  |
|             |             |         |          |             | 1.45086E-08 | #DIV/0! | 1313.23  | #DIV/0!  |  |
|             | 1.44579E-07 | 18895.5 | 53174    | 2.81412     | 5.26356E-11 | 10080.2 | 39343.4  | 3.90305  |  |
|             |             |         |          |             |             |         |          |          |  |
|             |             |         |          |             | 0.00117613  | #DIV/0! | 2506.57  | #DIV/0!  |  |
|             | 5.22475E-07 | 1186.13 | 582.7    | -2.03557    |             |         |          |          |  |
|             |             |         |          |             | 3.94112E-12 | 1924.93 | 5648.98  | 2.93465  |  |
|             | 2.59389E-07 | #DIV/0! | 1920.73  | #DIV/0!     | 3.66585E-12 | #DIV/0! | 1163.03  | #DIV/0!  |  |
|             |             |         |          |             | 5.15419E-10 | 5072.38 | 1317.08  | -3.85124 |  |
|             |             |         |          |             | 2.57979E-07 | 3146.95 | 908.8    | -3.46275 |  |
|             |             |         |          |             | 0.018278    | #DIV/0! | 2517.7   | #DIV/0!  |  |
|             |             |         |          |             |             |         |          |          |  |
|             | 1.10421E-06 | 1306.4  | 482.6    | -2.707      | 4.42989E-07 | 2392.75 | 5064.68  | 2.11668  |  |
|             | 0.000194998 | 1997.18 | 899.025  | -2.22149    | 3.22969E-08 | 1613.73 | 596.65   | -2.70464 |  |
|             |             |         |          |             |             |         |          |          |  |
|             |             |         |          |             | 3.06868E-05 | #DIV/0! | 1137.4   | #DIV/0!  |  |
|             | 0.00155213  | 1939.2  | 3990.15  | 2.05763     | 8.16263E-08 | #DIV/0! | 3869.5   | #DIV/0!  |  |
|             | 0.000171627 | 2860.28 | 7639.03  | 2.67073     | 4.04305E-07 | 1807.85 | 5419.78  | 2.99791  |  |



|         |             |         |         |          |             |         |         |          |
|---------|-------------|---------|---------|----------|-------------|---------|---------|----------|
|         |             |         |         |          | 0.000210019 | 3196.68 | 729.75  | -4.38051 |
|         |             |         |         |          | 1.06892E-10 | 3219    | 9413.68 | 2.92441  |
| -2.7869 | 0.00252575  | 991.675 | 467.95  | -2.11919 |             |         |         |          |
| -2.0328 | 4.49908E-07 | 4627.85 | 2217.05 | -2.08739 |             |         |         |          |
| -2.058  |             |         |         |          |             |         |         |          |
|         | 0.000375246 | 7103.35 | 2997.75 | -2.36956 |             |         |         |          |
|         |             |         |         |          | 3.16533E-05 | 1345.7  | 344.675 | -3.90426 |
|         |             |         |         |          | 0.00808423  | 982.375 | 370.2   | -2.65363 |
|         | 7.18289E-05 | 667.3   | #DIV/0! | #DIV/0!  |             |         |         |          |
|         |             |         |         |          | 5.57988E-07 | 1631.45 | 3543.33 | 2.17189  |
|         |             |         |         |          | 1.40774E-06 | 1626.63 | 4058.68 | 2.49514  |
|         |             |         |         |          | 2.53931E-07 | 1731.9  | 791.75  | -2.18743 |
|         |             |         |         |          | 1.60828E-08 | #DIV/0! | 2916.2  | #DIV/0!  |
|         |             |         |         |          | 4.21422E-11 | 1113.7  | 3173.03 | 2.84908  |
|         |             |         |         |          | 0.0107429   | 1806.33 | 728.3   | -2.48019 |
|         | 0.000833013 | 666.825 | 217.35  | -3.06798 | 0.00130114  | 1660.15 | 714.225 | -2.32441 |
|         | 0.00150368  | 537.1   | 1486.15 | 2.76699  |             |         |         |          |
|         | 1.05836E-05 | 483.967 | 2165.5  | 4.47448  |             |         |         |          |
|         |             |         |         |          | 1.83258E-16 | 3289.55 | 23217.9 | 7.05809  |
|         |             |         |         |          | 0.0167967   | 778.5   | #DIV/0! | #DIV/0!  |
| 8.44233 | 1.98701E-14 | 7885.93 | 92013.2 | 11.668   | 1.05473E-15 | 10959.8 | 109590  | 9.99921  |
| 8.2261  | 2.2176E-14  | 7458.28 | 107699  | 14.4402  | 3.26724E-16 | 9707.88 | 124662  | 12.8414  |
|         | 0.000632409 | 566.85  | 1251.1  | 2.20711  |             |         |         |          |
|         | 0.0019444   | 544.875 | #DIV/0! | #DIV/0!  |             |         |         |          |
|         |             |         |         |          | 5.51382E-05 | 898.3   | 434.8   | -2.06601 |
|         | 0.00216745  | 1494.18 | 4096.05 | 2.74135  |             |         |         |          |
|         | 0.00268954  | 551.167 | 2393    | 4.3417   |             |         |         |          |
|         | 9.54186E-07 | 17546.3 | 38420.7 | 2.18968  | 7.27328E-14 | 11214.4 | 53026   | 4.72837  |
|         | 6.70827E-06 | 6782.23 | 18864.5 | 2.78146  | 7.88662E-11 | 3968.73 | 21349.2 | 5.37937  |
|         | 5.85962E-08 | 8374.4  | 27454.3 | 3.27836  | 3.13808E-12 | 5319.6  | 31170.5 | 5.85955  |
|         |             |         |         |          | 9.60643E-05 | #DIV/0! | 3751.38 | #DIV/0!  |
|         | 2.18325E-05 | 2059.4  | 770.625 | -2.67238 |             |         |         |          |
|         |             |         |         |          |             |         |         |          |
|         | 0.0130467   | 990.067 | #DIV/0! | #DIV/0!  |             |         |         |          |
|         |             |         |         |          | 0.00278987  | 1420.63 | 442.1   | -3.21338 |
|         |             |         |         |          | 0.000441278 | 2801.68 | 770.4   | -3.63665 |
|         |             |         |         |          | 0.00102797  | 1152.07 | 427.4   | -2.69552 |
|         |             |         |         |          | 0.00054577  | 4367.37 | 1042.8  | -4.18812 |
|         |             |         |         |          | 1.28217E-08 | 1551.8  | #DIV/0! | #DIV/0!  |
|         |             |         |         |          | 0.000121291 | 4560.88 | 744.7   | -6.12445 |
|         |             |         |         |          | 7.95284E-05 | 2226.93 | 4636.18 | 2.08187  |
|         |             |         |         |          | 1.12437E-07 | 2713.83 | 6160.45 | 2.27002  |
|         |             |         |         |          | 5.54583E-08 | #DIV/0! | 1806.73 | #DIV/0!  |
|         |             |         |         |          | 4.23054E-07 | 3828.75 | #DIV/0! | #DIV/0!  |
|         |             |         |         |          | 0.000453981 | #DIV/0! | 4133.13 | #DIV/0!  |
| 2.33526 | 0.00153612  | #DIV/0! | 1523.15 | #DIV/0!  |             |         |         |          |
|         |             |         |         |          |             |         |         |          |
|         | 0.000006901 | 3132.88 | 8564.88 | 2.73387  | 5.81713E-06 | 2317.93 | 6676.68 | 2.88045  |
| 2.2401  | 5.44383E-08 | 1541.15 | 3808.25 | 2.47104  |             |         |         |          |
|         | 0.000420773 | 636.733 | #DIV/0! | #DIV/0!  |             |         |         |          |
|         | 0.000420647 | #DIV/0! | 1138.67 | #DIV/0!  |             |         |         |          |
|         |             |         |         |          | 9.97241E-05 | #DIV/0! | 2357.33 | #DIV/0!  |
|         |             |         |         |          | 2.28697E-07 | #DIV/0! | 1575.2  | #DIV/0!  |
|         |             |         |         |          | 0.0175614   | #DIV/0! | 2284.68 | #DIV/0!  |
|         |             |         |         |          |             |         |         |          |
|         | 2.03811E-06 | 4741.63 | 10834.7 | 2.28501  |             |         |         |          |
|         | 0.00000277  | 1407.03 | 380.8   | -3.69492 |             |         |         |          |
|         | 3.95493E-07 | 5504.8  | 13232.1 | 2.40374  | 7.62779E-14 | 2415.8  | 13343.5 | 5.52341  |

|         |             |         |         |          |             |         |         |          |
|---------|-------------|---------|---------|----------|-------------|---------|---------|----------|
|         |             |         |         |          | 3.97394E-11 | 3547.3  | 8906.53 | 2.51079  |
|         |             |         |         |          | 0.00145719  | 1777.45 | 398.033 | -4.46558 |
|         | 1.93592E-05 | 2104.63 | 886.275 | -2.37469 | 4.87155E-11 | 6548.48 | 1353.5  | -4.83818 |
|         |             |         |         |          | 1.49048E-07 | 10174.5 | 2130.1  | -4.77654 |
|         |             |         |         |          | 6.53612E-07 | 6939.3  | 1132.4  | -6.12796 |
|         |             |         |         |          | 0.00138933  | 3463.4  | 566.75  | -6.11098 |
|         | 0.000359368 | 18723.4 | 40999.4 | 2.18974  | 1.20024E-08 | 7218.05 | 27369.1 | 3.79175  |
|         |             |         |         |          | 0.0168857   | #DIV/0! | 752.95  | #DIV/0!  |
| -3.4754 | 1.19106E-11 | 5146.75 | 975.1   | -5.27818 | 3.17496E-07 | 4142.3  | 1247.8  | -3.31968 |
|         | 0.00231053  | 2030.83 | 1006.75 | -2.01721 |             |         |         |          |
|         | 0.000346829 | 5684.45 | 2440.6  | -2.32912 |             |         |         |          |
|         | 9.30663E-09 | 2577.45 | 734     | -3.51151 | 4.87438E-06 | 1907.67 | 883.125 | -2.16013 |
| #DIV/0! | 9.89133E-11 | 2621.67 | #DIV/0! | #DIV/0!  |             |         |         |          |
| -2.6067 |             |         |         |          |             |         |         |          |
|         | 8.38972E-05 | 998.95  | 452.8   | -2.20616 |             |         |         |          |
|         | 0.00196548  | 651.767 | 2849.43 | 4.37185  | 1.26424E-07 | 798.9   | 3126.78 | 3.91385  |
|         | 2.75215E-06 | 19403.2 | 44578.4 | 2.29748  | 3.53121E-15 | 8145.6  | 49934.7 | 6.13026  |
|         | 0.010608    | 605.3   | 231.3   | -2.61695 |             |         |         |          |
|         |             |         |         |          | 0.00107271  | #DIV/0! | 1511    | #DIV/0!  |
|         | 0.00194801  | 1343.75 | 358.3   | -3.75035 | 1.79936E-06 | 2013.05 | 247.65  | -8.12861 |
|         | 0.00198772  | 913.65  | 323.15  | -2.82732 |             |         |         |          |
|         | 0.00497014  | 591.567 | #DIV/0! | #DIV/0!  |             |         |         |          |
|         |             |         |         |          | 1.01488E-05 | 2181.95 | 921.325 | -2.36827 |
|         | 1.09421E-05 | 7088.13 | 2986    | -2.37379 |             |         |         |          |
|         | 8.83148E-05 | 22959.8 | 5834.83 | -3.93496 | 1.42575E-08 | 18293.5 | 1862.18 | -9.82371 |
|         |             |         |         |          |             |         |         |          |
|         | 6.34995E-06 | 11985.6 | 3712.78 | -3.22821 |             |         |         |          |
|         |             |         |         |          |             |         |         |          |
| -2.3287 | 2.50704E-10 | 3148.13 | 978.725 | -3.21656 |             |         |         |          |
| -2.6887 | 1.93947E-06 | 3933.65 | 1753    | -2.24395 |             |         |         |          |
| -3.6801 | 7.1306E-06  | 2419.15 | 1111.75 | -2.17598 |             |         |         |          |
|         | 1.27629E-08 | 2448.1  | 5880.55 | 2.40209  | 1.3665E-12  | 1681.5  | 5848.23 | 3.47798  |
|         | 0.000496038 | 829     | 398.45  | -2.08056 |             |         |         |          |
|         | 3.56994E-08 | 3424.48 | 7842.58 | 2.29015  | 1.85765E-10 | 2543.65 | 6975.18 | 2.74219  |
|         | 5.94357E-06 | 6917.95 | 14291.6 | 2.06586  | 1.32234E-08 | 5583.18 | 15864.3 | 2.84144  |
|         |             |         |         |          | 3.06078E-05 | #DIV/0! | 2763.75 | #DIV/0!  |
|         |             |         |         |          | 0.000127438 | 1037.8  | 380.4   | -2.72818 |
|         |             |         |         |          | 9.89647E-05 | 33845.6 | 10293.6 | -3.28803 |
|         | 5.13285E-07 | 1830.98 | 510.3   | -3.58804 | 5.50017E-06 | 2971.7  | 733.925 | -4.04905 |
|         | 3.52502E-05 | 1021.18 | 388.2   | -2.63054 | 5.16495E-07 | 2375.28 | 658.4   | -3.60765 |
|         |             |         |         |          | 7.55589E-06 | 2696.78 | 619.2   | -4.35526 |
|         | 0.00483246  | 2814.55 | 1314.2  | -2.14165 |             |         |         |          |
|         | 0.000438239 | 511.05  | 193.7   | -2.63836 | 0.00809317  | 588.975 | 207.167 | -2.843   |
| -2.3386 | 9.65312E-06 | 1087.25 | 267.8   | -4.05993 | 1.59367E-05 | 1245.5  | 367.2   | -3.39188 |
|         | 6.55806E-05 | 1027.4  | #DIV/0! | #DIV/0!  |             |         |         |          |
| -2.0861 |             |         |         |          |             |         |         |          |
|         | 5.74488E-07 | 2565.35 | 1029.45 | -2.49196 |             |         |         |          |
|         |             |         |         |          | 0.00608003  | 1313.2  | 2659    | 2.02482  |
|         | 0.00157292  | 609.233 | #DIV/0! | #DIV/0!  | 0.000373275 | 1461.07 | #DIV/0! | #DIV/0!  |
|         | 2.42117E-06 | 1823.28 | 802.8   | -2.27114 |             |         |         |          |
|         | 0.000110705 | 372.3   | 1354.05 | 3.63699  |             |         |         |          |
|         |             |         |         |          | 6.78613E-15 | 5841.9  | 17520.6 | 2.99912  |
|         |             |         |         |          | 0.00168741  | 1861.38 | 520.1   | -3.57888 |
|         |             |         |         |          | 8.93769E-07 | 3323.95 | 6879.98 | 2.06982  |
|         |             |         |         |          | 8.12006E-09 | 5063.25 | 10606.1 | 2.09472  |
|         | 0.0092493   | 509.267 | 218.633 | -2.32932 |             |         |         |          |
|         |             |         |         |          | 0.0136614   | 1281.5  | 499.633 | -2.56488 |
|         |             |         |         |          | 1.79001E-08 | 1706.93 | 4349.25 | 2.548    |
|         |             |         |         |          | 8.26871E-05 | 1066.95 | 321.6   | -3.31763 |
|         |             |         |         |          | 0.0205791   | 895.767 | 298.85  | -2.99738 |
|         | 0.00037627  | 582.5   | 1276.25 | 2.19099  |             |         |         |          |
|         | 0.00043834  | 810.675 | 377.275 | -2.14876 | 2.98748E-05 | 1617.23 | 481.975 | -3.35543 |
|         | 1.63742E-05 | 1067.18 | 3315.2  | 3.10652  | 1.45794E-07 | 699.8   | 2912.4  | 4.16176  |

|         |             |         |         |          |             |         |         |          |
|---------|-------------|---------|---------|----------|-------------|---------|---------|----------|
|         |             |         |         |          | 0.00066601  | 3920.65 | 913.4   | -4.29237 |
|         |             |         |         |          | 0.00238973  | 3198.68 | 786.55  | -4.06672 |
|         | 0.00048696  | 2142.9  | 967.2   | -2.21557 | 0.00118521  | 4127.55 | 1574.48 | -2.62154 |
|         |             |         |         |          | 2.17686E-08 | #DIV/0! | 3884.53 | #DIV/0!  |
|         |             |         |         |          | 0.000847882 | 1198.5  | #DIV/0! | #DIV/0!  |
|         | 0.00230136  | #DIV/0! | 1196.13 | #DIV/0!  |             |         |         |          |
| -2.3988 |             |         |         |          | 1.00861E-05 | 8774.98 | 1756.25 | -4.99643 |
|         | 0.00844316  | 3133.9  | 1087.23 | -2.88248 | 2.68784E-15 | 3275.7  | 10521.8 | 3.21208  |
|         | 7.0909E-13  | 4865.18 | 12647.9 | 2.59968  | 3.02819E-10 | 15283.1 | 57649.6 | 3.77212  |
|         |             |         |         |          | 9.39424E-10 | 2138.1  | 9225.53 | 4.31482  |
|         |             |         |         |          | 3.61E-14    | 5913.55 | 14567.4 | 2.46339  |
|         |             |         |         |          | 0.00261325  | 994.85  | 206.6   | -4.81534 |
|         | 0.00087944  | 651.267 | 142.7   | -4.56389 | 0.00707151  | 1634.63 | #DIV/0! | #DIV/0!  |
|         | 0.00150493  | 1373.43 | 3640.83 | 2.65091  |             |         |         |          |
|         |             |         |         |          | 0.000411938 | 1553.43 | 624.933 | -2.48575 |
| -2.3284 | 6.17753E-07 | 935.35  | 433.567 | -2.15734 |             |         |         |          |
|         |             |         |         |          | 5.37283E-09 | 3788.33 | 7958.55 | 2.10081  |
|         | 5.64266E-05 | 2530.05 | 6167.53 | 2.43771  |             |         |         |          |
|         | 1.81949E-05 | 1846.2  | 904.725 | -2.04062 | 2.01208E-09 | 2903.85 | 927.2   | -3.13185 |
|         |             |         |         |          | 0.000152531 | 645.775 | 269.667 | -2.39472 |
|         |             |         |         |          | 0.00102193  | #DIV/0! | 1322.73 | #DIV/0!  |
|         |             |         |         |          | 1.28394E-05 | 2753.23 | 693.4   | -3.97063 |
|         |             |         |         |          | 1.35346E-05 | 1151.23 | #DIV/0! | #DIV/0!  |
|         |             |         |         |          | 4.43329E-08 | 1795.65 | 855.1   | -2.09993 |
| -2.5881 | 0.000917714 | 1936.53 | 494.533 | -3.91586 |             |         |         |          |
|         | 0.00365166  | 620.075 | 292.2   | -2.12209 | 0.000833499 | 1043    | 462.25  | -2.25635 |
|         |             |         |         |          | 1.28275E-10 | #DIV/0! | 5380.53 | #DIV/0!  |
|         | 0.000371619 | 1581.35 | #DIV/0! | #DIV/0!  |             |         |         |          |
|         | 1.40015E-05 | 2403.8  | 1111.2  | -2.16325 | 8.73881E-05 | 2446.77 | 1223.33 | -2.0001  |
| -2.3893 | 0.000189001 | 1776.8  | 629.2   | -2.8239  |             |         |         |          |
|         | 4.52291E-06 | 1659.58 | 616.267 | -2.69295 |             |         |         |          |
|         | 2.35965E-08 | 1861.2  | 778.3   | -2.39137 |             |         |         |          |
|         |             |         |         |          | 0.00437154  | 1073.98 | 500.4   | -2.14623 |
|         | 1.11739E-05 | 580.075 | #DIV/0! | #DIV/0!  |             |         |         |          |
|         |             |         |         |          | 0.00893496  | 707.875 | 297.95  | -2.37582 |
|         | 3.90417E-05 | 1685.18 | 560.567 | -3.0062  | 0.00184688  | 1627    | 776.15  | -2.09624 |
|         |             |         |         |          | 6.53906E-07 | 3016.7  | 7410.35 | 2.45644  |
|         | 0.000035095 | 1416.05 | 627.475 | -2.25674 | 0.000123625 | 1839.23 | 773.3   | -2.37841 |
|         |             |         |         |          | 1.54687E-05 | 955.95  | 283.567 | -3.37116 |
|         | 0.00496546  | 1124.48 | 456.2   | -2.46487 |             |         |         |          |
|         |             |         |         |          | 3.84408E-06 | 1344.33 | 2877.28 | 2.1403   |
|         | 0.000011214 | 605.925 | 258.367 | -2.34521 | 0.000234499 | 831.367 | 352.45  | -2.35882 |
|         |             |         |         |          | 2.87943E-05 | 1286.65 | 375.8   | -3.42376 |
|         |             |         |         |          | 0.000284248 | 1794.95 | 892.625 | -2.01087 |
|         | 0.000069882 | 2426.87 | 1061.9  | -2.2854  | 1.52709E-06 | #DIV/0! | 5576.78 | #DIV/0!  |
|         |             |         |         |          | 4.62966E-06 | 1240.4  | 352.167 | -3.5222  |
|         | 0.0013581   | 678.567 | 197.9   | -3.42884 | 8.02361E-05 | 1258.15 | 537.2   | -2.34205 |
|         | 3.89702E-05 | 696.575 | 292.033 | -2.38526 | 1.72759E-07 | 1824.18 | 804.75  | -2.26676 |
|         |             |         |         |          |             |         |         |          |
|         | 5.57766E-06 | 1030.85 | 424.867 | -2.42629 | 2.95746E-05 | 1276    | 370.1   | -3.44772 |
|         | 0.00125027  | 536.575 | #DIV/0! | #DIV/0!  | 9.80235E-11 | 14527.9 | 66651.6 | 4.58782  |
|         |             |         |         |          | 0.00586741  | 2551.1  | 672.6   | -3.79289 |
| -3.2204 | 4.87318E-09 | 26573.6 | 5222.83 | -5.08797 | 2.17698E-09 | 11705.6 | 2427.65 | -4.82176 |
|         | 8.93924E-05 | 12615.5 | 5857.45 | -2.15376 | 0.000000162 | 13151.8 | 4309.13 | -3.05208 |
| -2.0258 |             |         |         |          | 1.78706E-06 | 18727.5 | 8364.58 | -2.23891 |
|         |             |         |         |          | 1.59893E-05 | 14165.7 | 6648.4  | -2.13069 |
|         |             |         |         |          | 1.71325E-05 | 14380.2 | 7047.38 | -2.0405  |
|         | 0.000110986 | 13834.7 | 6601.3  | -2.09575 |             |         |         |          |
|         | 1.03316E-05 | 9313.9  | 21763.7 | 2.33669  | 4.59738E-06 | 6245.78 | 14376.2 | 2.30175  |
|         | 0.000118877 | 868.65  | 359.3   | -2.41762 |             |         |         |          |
|         | 0.000211222 | 771.825 | 215.6   | -3.57989 | 0.000447793 | 2193.7  | 649.375 | -3.37817 |

|         |             |         |         |          |             |         |         |          |
|---------|-------------|---------|---------|----------|-------------|---------|---------|----------|
| -3.0575 | 1.95718E-09 | 4098.7  | 576.6   | -7.10839 | 0.000616016 | 1855.73 | 880.5   | -2.10759 |
| -2.0668 | 6.78477E-06 | 1021.03 | 299.1   | -3.41366 |             |         |         |          |
| -2.6652 | 5.29871E-06 | 1311.43 | 606.675 | -2.16166 |             |         |         |          |
|         | 0.00832113  | 933.2   | 429.3   | -2.17377 |             |         |         |          |
|         |             |         |         |          | 2.08047E-06 | 7464.98 | 15091.6 | 2.02165  |
|         |             |         |         |          |             |         |         |          |
|         |             |         |         |          | 0.00607466  | 1880.3  | 583.35  | -3.22328 |
|         | 6.48577E-06 | 1357.65 | 4007.65 | 2.9519   | 0.00100163  | 1641.38 | 3472.33 | 2.1155   |
| #DIV/0! | 2.26227E-11 | #DIV/0! | 695.55  | #DIV/0!  |             |         |         |          |
|         |             |         |         |          | 9.61187E-07 | 2187.85 | 652.633 | -3.35234 |
|         |             |         |         |          |             |         |         |          |
| -2.1451 | 3.81773E-10 | 1794.03 | 498.375 | -3.59975 | 5.30645E-09 | 3000.98 | 868.3   | -3.45615 |
| 2.47609 |             |         |         |          |             |         |         |          |
|         |             |         |         |          | 1.6344E-12  | 6697.7  | 14821.2 | 2.21288  |
|         |             |         |         |          |             |         |         |          |
| -3.4929 | 2.90777E-11 | 18497.3 | 4633.75 | -3.99187 |             |         |         |          |
| -4.3403 | 2.08057E-06 | 4895.98 | 1759.53 | -2.78255 |             |         |         |          |
| #DIV/0! | 0.00209878  | 973.3   | 474.6   | -2.05078 |             |         |         |          |
|         |             |         |         |          | 9.85501E-17 | 6423.23 | 20048.2 | 3.12121  |
|         | 0.000190619 | 1270.03 | 443.15  | -2.8659  |             |         |         |          |
|         |             |         |         |          | 0.000107388 | 1424.98 | 517.467 | -2.75375 |
|         |             |         |         |          | 2.38071E-08 | 49061.4 | 124538  | 2.53842  |
|         |             |         |         |          | 2.96334E-09 | 42520.6 | 114635  | 2.696    |
|         |             |         |         |          | 2.74356E-15 | 6461.55 | 20387.4 | 3.15518  |
|         |             |         |         |          | 1.28006E-07 | 1546.53 | #DIV/0! | #DIV/0!  |
|         |             |         |         |          | 1.38906E-06 | 3271.85 | #DIV/0! | #DIV/0!  |
|         |             |         |         |          | 3.26389E-05 | 2302.85 | 485     | -4.74814 |
|         |             |         |         |          | 0.000566869 | 1978.83 | 4022.9  | 2.03297  |
|         |             |         |         |          | 2.09046E-10 | 1919.7  | 4478.15 | 2.33273  |
|         |             |         |         |          | 2.28147E-07 | 5191.83 | 11773.7 | 2.26774  |
|         |             |         |         |          | 0.00953402  | 1527.1  | 443.467 | -3.44355 |
|         | 1.41518E-07 | 8126.25 | 3561.33 | -2.28181 | 1.93811E-06 | 13844.6 | 6678    | -2.07316 |
| 2.3816  | 5.17519E-11 | 2683.85 | 10193.5 | 3.79809  | 1.01336E-15 | 2233.33 | 16656   | 7.45793  |
|         |             |         |         |          | 7.45292E-13 | 29696.8 | 67401   | 2.26964  |
|         |             |         |         |          | 4.59916E-08 | #DIV/0! | 2270    | #DIV/0!  |
|         | 0.000638171 | 2336.5  | 4882.9  | 2.08984  | 3.65693E-13 | #DIV/0! | 4321.8  | #DIV/0!  |
|         |             |         |         |          | 6.75314E-16 | 2200.23 | 6099.78 | 2.77234  |
|         |             |         |         |          | 8.00084E-08 | #DIV/0! | 4160.63 | #DIV/0!  |
|         | 0.000187522 | #DIV/0! | 2362.03 | #DIV/0!  | 0.0142416   | #DIV/0! | 3222.03 | #DIV/0!  |
| 2.25642 |             |         |         |          | 1.30316E-09 | #DIV/0! | 3274.33 | #DIV/0!  |
|         | 2.05839E-06 | 2588    | 7916.73 | 3.05901  | 9.86673E-07 | 1549.6  | 5945.08 | 3.83652  |
|         | 6.50377E-15 | 1924.78 | 7216.7  | 3.74937  | 7.92164E-16 | 1221.85 | 4839.98 | 3.96119  |
|         |             |         |         |          | 2.75518E-08 | 95820.1 | 210554  | 2.19738  |
|         |             |         |         |          | 8.13518E-12 | 4703.98 | 12002.6 | 2.55158  |
|         | 3.31484E-07 | 2554.83 | 672     | -3.80182 | 7.06938E-07 | 3219.78 | 930.95  | -3.45859 |
| -2.2724 |             |         |         |          |             |         |         |          |
|         |             |         |         |          | 4.44921E-06 | 4144.2  | 762.5   | -5.43502 |
|         | 4.97999E-15 | 6941.48 | 17061.1 | 2.45785  | 7.04736E-15 | 4768.95 | 11395.4 | 2.38949  |
|         |             |         |         |          | 3.35602E-10 | 5144.63 | 14818.3 | 2.88035  |
|         | 3.53956E-08 | 9803.53 | 21255.7 | 2.16817  | 2.09788E-11 | 4168.6  | 12500.3 | 2.99869  |
|         |             |         |         |          | 4.39182E-10 | 1773.65 | 5536.08 | 3.12129  |
|         |             |         |         |          | 1.62958E-13 | 18105.3 | 67252.6 | 3.71453  |
|         |             |         |         |          | 0.000159039 | 1949.65 | 4315.95 | 2.21371  |
|         |             |         |         |          | 1.33867E-12 | 5208.5  | 14260.3 | 2.73789  |
|         |             |         |         |          | 2.91378E-12 | 8403.18 | 18655.6 | 2.22006  |
|         |             |         |         |          | 2.81799E-11 | 29430.1 | 81431.7 | 2.76696  |
|         |             |         |         |          | 7.84668E-18 | 12731.4 | 42910.6 | 3.37046  |
|         |             |         |         |          | 3.07482E-11 | 2067.45 | 6825.98 | 3.30164  |
|         | 0.000630494 | 1888.87 | 804.5   | -2.34788 |             |         |         |          |
|         |             |         |         |          | 2.33733E-09 | 8813.78 | 29534.5 | 3.35095  |
| -2.5523 | 5.83469E-10 | 5976.78 | 1866.7  | -3.20179 | 5.53234E-10 | 5189.03 | 1607.5  | -3.22801 |
| 5.34064 | 1.91754E-07 | 1678.98 | 7926.13 | 4.72081  | 1.61114E-07 | 3848.5  | 8124.13 | 2.11098  |
| 4.56491 | 2.75094E-08 | 2897.43 | 13937.2 | 4.81018  | 1.12608E-10 | 2158.88 | 14385.8 | 6.66355  |
| 4.24929 | 3.42537E-09 | 2446.53 | 15598.5 | 6.37578  | 2.2352E-12  | 1900.95 | 18328.3 | 9.64163  |

|         |             |         |         |          |             |         |         |          |
|---------|-------------|---------|---------|----------|-------------|---------|---------|----------|
| #DIV/0! | 0.000025421 | #DIV/0! | 2756.23 | #DIV/0!  | 2.97623E-08 | #DIV/0! | 2781.75 | #DIV/0!  |
|         | 1.34471E-07 | 6373.03 | 12858   | 2.01757  | 1.23721E-13 | 2507.9  | 8549.05 | 3.40885  |
|         | 0.00101657  | 1285.95 | 589.267 | -2.18229 |             |         |         |          |
|         | 8.19312E-06 | 3139.53 | 7592.1  | 2.41823  | 1.08498E-09 | 2801.3  | 5612.1  | 2.00339  |
|         |             |         |         |          | 1.12228E-09 | 4467.75 | 13129.8 | 2.93878  |
|         | 2.5325E-09  | 4550.08 | 9603.6  | 2.11065  | 1.93681E-15 | 2092.1  | 7313.85 | 3.49594  |
|         | 2.48209E-07 | 3627.63 | 7314.5  | 2.01633  | 3.19673E-08 | #DIV/0! | 5486.2  | #DIV/0!  |
|         |             |         |         |          | 4.96149E-08 | 5505.3  | 12936.5 | 2.34982  |
| -2.179  | 2.52574E-06 | 1310.75 | 471.767 | -2.77839 |             |         |         |          |
|         | 5.24489E-06 | 4335.8  | 10688.2 | 2.4651   | 0.000104195 | 4260.75 | 8832.15 | 2.07291  |
|         | 8.48101E-06 | 4785.5  | 10391.2 | 2.17139  |             |         |         |          |
|         | 2.30999E-05 | 4058    | 8823.18 | 2.17427  |             |         |         |          |
|         | 0.000163141 | 18934.7 | 7612.68 | -2.48726 | 0.000103267 | 11887.6 | 4790.18 | -2.48167 |
|         | 6.47948E-05 | 2418.93 | 10913.2 | 4.5116   | 2.66185E-08 | 2885.1  | 7566.05 | 2.62246  |
|         |             |         |         |          | 0.000950955 | #DIV/0! | 1310.75 | #DIV/0!  |
|         |             |         |         |          | 2.67897E-08 | 4233.75 | 11286.6 | 2.66587  |
|         |             |         |         |          | 0.000100219 | 2965.43 | 1159.65 | -2.55717 |
|         |             |         |         |          | 5.67855E-15 | 3013.78 | 14108.5 | 4.68135  |
|         | 2.31169E-05 | 27441.5 | 55152.8 | 2.00984  | 6.70896E-16 | 9751.85 | 64826.2 | 6.64758  |
| 2.28223 | 3.01513E-09 | 4790.58 | 14974.7 | 3.12586  | 2.88918E-13 | 2938.93 | 14543.4 | 4.94853  |
|         |             |         |         |          | 4.42874E-12 | 4403    | 10403.3 | 2.36277  |
|         |             |         |         |          | 0.0173978   | #DIV/0! | 1670.2  | #DIV/0!  |
|         |             |         |         |          | 2.79529E-06 | 4900.35 | 1596.6  | -3.06924 |
|         | 3.00928E-06 | 1703.08 | 737.175 | -2.31027 | 1.77437E-05 | 2285.85 | 1040.75 | -2.19635 |
|         |             |         |         |          | 0.000171988 | #DIV/0! | 1253.57 | #DIV/0!  |
|         |             |         |         |          | 1.74376E-09 | 5354.63 | 11032.6 | 2.06039  |
| -2.0521 | 6.82273E-07 | 4735.48 | 2064.35 | -2.29393 |             |         |         |          |
|         |             |         |         |          | 3.84438E-06 | 1625.8  | 721.375 | -2.25375 |
|         |             |         |         |          | 9.58142E-10 | 6550.75 | 17223.5 | 2.62924  |
|         |             |         |         |          | 3.53378E-07 | 5804.2  | 13187.2 | 2.27201  |
|         |             |         |         |          | 1.93489E-07 | #DIV/0! | 2458.68 | #DIV/0!  |
|         |             |         |         |          | 1.82902E-08 | 4291.53 | 9364.4  | 2.18207  |
|         |             |         |         |          | 1.22225E-14 | 2804.98 | 9087.43 | 3.23975  |
|         |             |         |         |          | 0.0101511   | #DIV/0! | 2780.78 | #DIV/0!  |
| -2.3898 |             |         |         |          |             |         |         |          |
| -2.0997 | 3.82304E-05 | 2650.15 | 1311.05 | -2.0214  |             |         |         |          |
|         |             |         |         |          | 4.96657E-12 | 4670.18 | 10935.4 | 2.34153  |
|         |             |         |         |          | 3.10679E-13 | 1973.85 | 5463.58 | 2.76798  |
|         | 5.8112E-08  | 1800.1  | 5352.43 | 2.9734   | 1.51455E-12 | #DIV/0! | 5251.83 | #DIV/0!  |
|         | 9.85454E-05 | 3169    | 1360.33 | -2.32959 |             |         |         |          |
| -2.2596 | 6.0763E-07  | 19546.4 | 6399.85 | -3.05419 |             |         |         |          |
|         | 8.02478E-11 | 4826.48 | 12066.1 | 2.49998  | 1.24914E-14 | 3218.28 | 11457.9 | 3.56026  |
|         |             |         |         |          | 4.30093E-08 | 5045.8  | 12947.4 | 2.56597  |
|         |             |         |         |          | 8.54464E-09 | 2815.23 | 1238.88 | -2.2724  |
|         |             |         |         |          | 3.61771E-08 | 2009.63 | 5794.1  | 2.88317  |
|         | 2.02175E-09 | 7033.8  | 15361.6 | 2.18396  | 3.3423E-16  | 3937.23 | 14083.7 | 3.57705  |
|         | 1.59026E-07 | 6739.65 | 14346.4 | 2.12865  | 7.90141E-12 | 4221.9  | 15151.8 | 3.58885  |
|         | 1.69241E-11 | 4705.63 | 13575.8 | 2.885    | 2.95431E-15 | 3308.83 | 12536.3 | 3.78875  |
|         |             |         |         |          | 4.14018E-07 | #DIV/0! | 3329.75 | #DIV/0!  |
|         |             |         |         |          | 1.32438E-07 | 1208.4  | 354.7   | -3.40682 |
| -2.6845 | 4.74611E-09 | 2523.4  | 879.233 | -2.87    | 9.7872E-16  | 5036.95 | 697.067 | -7.22592 |
|         |             |         |         |          | 9.32118E-11 | 3296.9  | 7888.88 | 2.39282  |
| 2.83617 | 1.80172E-09 | 793.175 | 3018.93 | 3.80613  | 2.40475E-07 | 1094.05 | 3069.13 | 2.80529  |
| 2.27388 | 2.91717E-10 | 10660.4 | 38403.5 | 3.60246  | 1.99618E-14 | 6801.18 | 38069.7 | 5.59752  |
|         |             |         |         |          | 0.00105584  | 1672.4  | 639.2   | -2.6164  |
|         |             |         |         |          | 0.0137621   | 1332.85 | #DIV/0! | #DIV/0!  |
|         |             |         |         |          | 6.59581E-06 | 1524.98 | 267.35  | -5.70404 |
|         | 7.98786E-07 | 9641.25 | 22494.8 | 2.33318  | 4.54252E-09 | 4913.68 | 15376.7 | 3.12937  |
|         |             |         |         |          | 1.56533E-05 | #DIV/0! | 2802.38 | #DIV/0!  |
|         |             |         |         |          | 0.00282084  | 1426.87 | 675.45  | -2.11247 |
|         |             |         |         |          | 0.000009559 | 1635.07 | 563     | -2.9042  |
|         | 0.000481733 | 4831.4  | 16244.6 | 3.36229  | 4.73608E-08 | #DIV/0! | 8578.13 | #DIV/0!  |

|         |             |         |         |          |             |         |         |          |
|---------|-------------|---------|---------|----------|-------------|---------|---------|----------|
|         |             |         |         |          | 1.33397E-05 | 1931.15 | 4853.23 | 2.51313  |
|         | 8.06898E-05 | 1432.7  | 687.625 | -2.08355 |             |         |         |          |
|         | 3.49281E-05 | 602.8   | #DIV/0! | #DIV/0!  |             |         |         |          |
|         | 4.05173E-06 | 881.4   | 318.8   | -2.76474 |             |         |         |          |
|         |             |         |         |          | 0.0190991   | 1879.68 | 927.975 | -2.02557 |
|         | 0.00235789  | 828.433 | 402.475 | -2.05835 |             |         |         |          |
|         |             |         |         |          | 0.00792528  | 819.2   | 298.9   | -2.74072 |
| 4.35627 |             |         |         |          | 0.00261717  | #DIV/0! | 3150.75 | #DIV/0!  |
| 2.99984 | 0.000155267 | #DIV/0! | 993.475 | #DIV/0!  |             |         |         |          |
|         | 0.000371267 | 3538.33 | 1614.28 | -2.1919  | 2.74995E-05 | 6387.83 | 2530.68 | -2.52416 |
|         | 0.0000439   | 656.475 | #DIV/0! | #DIV/0!  |             |         |         |          |
| 2.08142 | 0.00017544  | 1440.43 | 3190.2  | 2.21476  |             |         |         |          |
| 3.59267 | 7.35294E-06 | 548     | 2063.63 | 3.76574  | 0.00145911  | #DIV/0! | 2201.8  | #DIV/0!  |
|         | 0.0108866   | 821.267 | 396.05  | -2.07364 | 1.07663E-05 | 1485    | 538.425 | -2.75804 |
|         | 3.62052E-06 | 1128.03 | 468.625 | -2.4071  | 3.51577E-07 | 1602.18 | 622.9   | -2.57212 |
|         | 0.00206353  | 839.975 | 1928.7  | 2.29614  | 2.92512E-05 | 736.8   | 2321.75 | 3.15113  |
|         | 1.82791E-08 | 12557.7 | 33759   | 2.68832  | 1.70003E-14 | 6754.95 | 34674.4 | 5.13319  |
|         | 3.16245E-07 | 6964.23 | 21353.9 | 3.06622  | 1.27608E-12 | 3472.35 | 19944.3 | 5.74373  |
|         |             |         |         |          | 1.50928E-07 | 3433.08 | 7137.4  | 2.07901  |
|         | 0.000130647 | 1666.73 | 720.15  | -2.31441 | 6.14892E-05 | 2802    | 1302.93 | -2.15055 |
|         |             |         |         |          | 2.6721E-06  | 4253.78 | 17090.5 | 4.01772  |
|         |             |         |         |          | 0.0019842   | 2096.63 | 963.4   | -2.17628 |
|         |             |         |         |          | 5.14628E-06 | 2304.03 | 743.65  | -3.09827 |
|         |             |         |         |          | 4.75927E-07 | 3262.6  | 6746.6  | 2.06786  |
|         |             |         |         |          | 1.64175E-05 | 2422.68 | 4850.48 | 2.00212  |
| -2.7778 | 4.77148E-10 | 2831.43 | 914.85  | -3.09496 |             |         |         |          |
|         | 7.87525E-05 | 2478.03 | 1155.1  | -2.14529 |             |         |         |          |
|         | 5.84849E-07 | 1530.78 | 621.85  | -2.46165 | 2.21399E-06 | 2113.5  | 969.375 | -2.18027 |
| 2.44704 | 1.17499E-06 | 830.9   | 2338.55 | 2.81448  | 4.93074E-06 | 1212.1  | 2671.5  | 2.20403  |
|         | 8.38443E-06 | 828.4   | 2287.38 | 2.7612   | 0.00183684  | #DIV/0! | 2482.95 | #DIV/0!  |
|         |             |         |         |          | 9.32437E-11 | 5807.65 | 15776.2 | 2.71645  |
|         |             |         |         |          | 2.08156E-06 | 2094.7  | 4204.9  | 2.0074   |
|         |             |         |         |          | 2.36197E-05 | 1997.9  | 5651.43 | 2.82868  |
|         | 1.61392E-12 | 5677.03 | 2301.25 | -2.46693 |             |         |         |          |
|         | 4.32043E-09 | 2783.77 | 867.3   | -3.20969 | 0.000706488 | #DIV/0! | 1512.65 | #DIV/0!  |
| #DIV/0! | 5.14944E-07 | #DIV/0! | 1507.23 | #DIV/0!  | 1.40198E-06 | #DIV/0! | 1464.5  | #DIV/0!  |
| 5.26181 | 1.81428E-05 | 1390.68 | 3379.75 | 2.43029  |             |         |         |          |
| 5.5703  | 3.12305E-11 | #DIV/0! | 2554.4  | #DIV/0!  |             |         |         |          |
|         |             |         |         |          | 3.11477E-08 | 6090.5  | 12754.5 | 2.09416  |
|         |             |         |         |          | 1.67066E-08 | 6162.58 | 13046   | 2.11698  |
|         |             |         |         |          | 0.00462856  | 1163.17 | 512.9   | -2.26782 |
|         |             |         |         |          | 0.00381117  | 1226.83 | 356.067 | -3.44549 |
| 2.24157 |             |         |         |          | 3.81172E-05 | 1628.58 | 763.65  | -2.13262 |
|         |             |         |         |          | 3.93348E-06 | 1904.83 | 896.675 | -2.12432 |
|         |             |         |         |          | 6.74925E-05 | 1181.1  | 497.575 | -2.37371 |
|         | 1.32098E-05 | 3607.13 | 1751.7  | -2.05921 |             |         |         |          |
|         |             |         |         |          | 2.22545E-06 | 2288.6  | 761.425 | -3.00568 |
|         |             |         |         |          | 0.0168326   | 1374.33 | 518.967 | -2.6482  |
|         | 0.00684323  | 1594.13 | 543.4   | -2.93361 | 0.0118197   | 3027.98 | 1184.8  | -2.55568 |
|         |             |         |         |          | 7.89596E-16 | 5957.58 | 16799.1 | 2.81978  |
|         |             |         |         |          | 0.0058279   | 1909.7  | 314.133 | -6.07927 |
|         |             |         |         |          | 0.00306497  | 1777.28 | 687     | -2.58701 |
|         | 9.221E-08   | 1733.85 | 757.375 | -2.28929 | 3.22571E-08 | 2134.03 | 917.55  | -2.32579 |
| -2.5493 | 1.35485E-06 | 6304.25 | 2270.85 | -2.77616 |             |         |         |          |
| -2.1401 | 7.05698E-12 | 2522.55 | 743.425 | -3.39315 | 2.60738E-14 | 3353.7  | 785.075 | -4.27182 |
|         | 2.40535E-12 | 1605.85 | 602.6   | -2.66487 | 1.89088E-14 | 1734.5  | 560.95  | -3.09208 |
|         | 2.72521E-08 | 1101.8  | 515.8   | -2.1361  | 1.4525E-11  | 1567.75 | 521.15  | -3.00825 |
|         |             |         |         |          | 1.36239E-08 | 813.15  | 2145.6  | 2.63863  |
|         |             |         |         |          | 0.00660337  | #DIV/0! | 994.675 | #DIV/0!  |
|         |             |         |         |          | 0.000201926 | 1393.8  | 567.633 | -2.45546 |
|         |             |         |         |          | 1.33664E-07 | 3134.28 | 6555.95 | 2.0917   |

|         |             |         |         |          |             |         |         |          |
|---------|-------------|---------|---------|----------|-------------|---------|---------|----------|
|         | 0.000512917 | 2309.85 | 5152.83 | 2.23081  | 6.85292E-07 | 1405.5  | 4105.8  | 2.92124  |
|         |             |         |         |          | 9.30588E-08 | 1423.63 | 4700.03 | 3.30143  |
|         |             |         |         |          | 2.41527E-11 | 2999.4  | 6750.23 | 2.25053  |
|         |             |         |         |          | 3.96268E-09 | 6273.05 | 14244.4 | 2.27072  |
|         |             |         |         |          | 1.4171E-09  | 3220.03 | 547.85  | -5.87757 |
|         |             |         |         |          | 4.92832E-15 | 12629.4 | 33529.1 | 2.65485  |
|         | 0.00061461  | 678.267 | #DIV/0! | #DIV/0!  | 0.00146847  | 1845.88 | 613.5   | -3.00876 |
|         |             |         |         |          | 3.33435E-11 | 2238.6  | 634.8   | -3.52647 |
|         |             |         |         |          | 2.21714E-06 | 746.833 | 234.2   | -3.18887 |
| -2.601  | 4.70905E-11 | 8147.73 | 3203.08 | -2.54372 | 2.03458E-13 | 8562.45 | 2850.95 | -3.00337 |
|         |             |         |         |          | 0.00264666  | #DIV/0! | 990.7   | #DIV/0!  |
|         | 0.000013961 | 1218.75 | 543.875 | -2.24086 |             |         |         |          |
| 7.37397 | 1.75667E-08 | 888.3   | 3876.1  | 4.3635   | 8.49427E-07 | 1470.08 | 4713.13 | 3.20604  |
| 6.67664 | 5.25748E-10 | 1480.1  | 9580.3  | 6.47274  | 6.97224E-09 | 2155.08 | 10170.7 | 4.71941  |
|         | 9.5015E-15  | 5991.23 | 17908.9 | 2.98918  | 1.00587E-17 | 4548.18 | 16718.6 | 3.67589  |
|         |             |         |         |          | 6.01497E-07 | 2380.87 | 4866.33 | 2.04393  |
|         |             |         |         |          | 2.15902E-10 | #DIV/0! | 5130.2  | #DIV/0!  |
|         | 1.73049E-07 | 4521.05 | 16811.8 | 3.71856  | 3.31874E-08 | 2504.13 | 8444.75 | 3.37232  |
|         | 6.27233E-08 | 6092    | 27756.3 | 4.55618  | 1.20003E-08 | 3800.3  | 16636.4 | 4.37765  |
| 2.3002  | 3.38018E-09 | 1208.67 | 5076.08 | 4.19973  | 1.77995E-06 | #DIV/0! | 2315.1  | #DIV/0!  |
| 28.6935 | 5.56878E-07 | 891.9   | 32502.5 | 36.4419  | 3.12673E-10 | 5139.7  | 38004.6 | 7.39432  |
| 14.3922 | 7.09006E-13 | 1996.53 | 45789.7 | 22.9347  | 1.41721E-11 | 4530.95 | 43080.8 | 9.50812  |
| 14.4337 | 9.25945E-11 | 1019.9  | 23174.7 | 22.7225  | 5.15323E-10 | 2359.63 | 24034.2 | 10.1856  |
| 12.9416 | 3.35209E-08 | 5012.53 | 76862.3 | 15.334   | 1.72494E-10 | 7304.25 | 102248  | 13.9984  |
| #DIV/0! | 0.000161827 | #DIV/0! | 2080.63 | #DIV/0!  | 0.0133134   | #DIV/0! | 2378.85 | #DIV/0!  |
|         |             |         |         |          | 0.0209993   | 1005.67 | 453.2   | -2.21904 |
|         |             |         |         |          | 0.00795544  | 684.267 | #DIV/0! | #DIV/0!  |
| 17.6678 | 2.31693E-12 | 658.1   | 6299.75 | 9.57263  | 2.04536E-08 | 2582.5  | 8395.93 | 3.25108  |
| 12.0563 | 2.10013E-13 | 899.85  | 6342.68 | 7.04859  | 7.2843E-11  | 1717.1  | 6729.63 | 3.91918  |
|         |             |         |         |          | 0.000481564 | 1357.18 | 618.967 | -2.19265 |
|         |             |         |         |          | 0.000115847 | 2785.93 | 1380.6  | -2.01791 |
|         | 0.0053539   | #DIV/0! | 1285.1  | #DIV/0!  |             |         |         |          |
| #DIV/0! |             |         |         |          | 0.000175721 | 2001.38 | 631.175 | -3.17087 |
| 2.58134 | 1.2012E-06  | 7904.48 | 25857.6 | 3.27126  |             |         |         |          |
|         |             |         |         |          | 0.0162628   | 1560.68 | 417.033 | -3.74233 |
|         | 0.00134153  | 2921.38 | #DIV/0! | #DIV/0!  |             |         |         |          |
| 3.2326  | 4.3462E-12  | 1350.88 | 9298.6  | 6.88339  | 2.11891E-13 | 2249.1  | 8839.98 | 3.93045  |
|         | 0.00551462  | 892.6   | 2756.35 | 3.088    | 0.00152572  | 1397.83 | 3951.93 | 2.8272   |
|         |             |         |         |          | 0.00508721  | 1445.9  | 4866    | 3.36538  |
|         |             |         |         |          | 5.90142E-07 | 11750.4 | 36171.8 | 3.07836  |
|         |             |         |         |          | 2.96451E-17 | 1870.23 | 18338.8 | 9.80565  |
|         |             |         |         |          | 7.19041E-20 | 2923.6  | 33340.5 | 11.4039  |
|         |             |         |         |          | 2.38802E-11 | #DIV/0! | 6441.65 | #DIV/0!  |
|         | 2.5236E-09  | 2789.88 | 905.95  | -3.0795  |             |         |         |          |
|         | 0.00147383  | 5226.18 | 2572.3  | -2.03171 |             |         |         |          |
| -2.2725 | 5.09352E-08 | 3385.8  | 1277.75 | -2.64981 | 5.04918E-10 | 4661.83 | 1345.43 | -3.46495 |
|         |             |         |         |          | 8.39209E-05 | 1543.63 | 570.9   | -2.70386 |
|         |             |         |         |          | 1.64731E-05 | 1371.67 | 480.05  | -2.85734 |
| 2.51638 | 2.65886E-11 | 2478.3  | 12738   | 5.13979  | 7.48082E-10 | 1806.1  | 7060.4  | 3.9092   |
| 2.3329  | 0.000303359 | #DIV/0! | 2903.3  | #DIV/0!  | 1.39509E-05 | #DIV/0! | 1347    | #DIV/0!  |
|         |             |         |         |          | 1.04537E-10 | 5003.38 | 11258.4 | 2.25016  |
|         |             |         |         |          | 3.19808E-11 | 10302.1 | 24331.7 | 2.36183  |
|         |             |         |         |          | 1.72071E-15 | 4189.8  | 13622.5 | 3.25135  |
|         |             |         |         |          | 9.46209E-12 | 6198.98 | 17382.2 | 2.80404  |
| -3.6376 | 0.000534291 | 1388.55 | 584.175 | -2.37694 |             |         |         |          |
|         |             |         |         |          |             |         |         |          |
| -2.1186 | 2.18153E-09 | 1248.23 | 377.867 | -3.30335 | 1.46417E-12 | 1733.48 | 308     | -5.62817 |
|         | 1.76889E-12 | 2382    | 7625.3  | 3.20122  | 1.00766E-13 | 1839.68 | 6147.68 | 3.34172  |
|         |             |         |         |          | 2.38995E-14 | 5073.8  | 27818.8 | 5.48284  |
|         | 4.00223E-07 | 9440.03 | 22531.5 | 2.38681  | 7.01684E-14 | 3863.88 | 22233.8 | 5.75428  |
| -3.2966 | 0.000154583 | 1036.45 | 424.7   | -2.44043 |             |         |         |          |
|         | 2.46657E-07 | 3609.58 | 1655.17 | -2.18079 |             |         |         |          |

|         |             |         |         |          |             |         |         |          |
|---------|-------------|---------|---------|----------|-------------|---------|---------|----------|
|         | 2.16222E-06 | 1380.9  | 669.1   | -2.06382 | 6.52473E-10 | 1782.85 | 587.675 | -3.03373 |
|         |             |         |         |          | 1.71818E-08 | 1607.5  | 659.625 | -2.43699 |
|         | 8.1348E-07  | 1894.45 | 870.525 | -2.17622 | 1.07285E-06 | 1255.6  | 571.3   | -2.19779 |
|         |             |         |         |          | 2.49166E-07 | 1939.78 | 4697.33 | 2.42158  |
|         |             |         |         |          | 5.20928E-10 | 3612.08 | 13303.6 | 3.68308  |
|         | 4.32713E-12 | 1770.63 | 6109.68 | 3.45058  |             |         |         |          |
|         |             |         |         |          | 2.13958E-07 | 1872.9  | 756.9   | -2.47444 |
|         |             |         |         |          | 6.00827E-19 | 2054.1  | 6016.5  | 2.92902  |
|         | 6.57414E-07 | 1870.28 | 593.533 | -3.15109 | 1.6325E-06  | 2385.48 | 929.6   | -2.56613 |
|         |             |         |         |          | 1.4498E-06  | 1881.23 | 616.7   | -3.05048 |
|         |             |         |         |          | 3.35229E-05 | 3472    | 1719.8  | -2.01884 |
|         |             |         |         |          | 0.00214916  | 774.925 | 348.4   | -2.22424 |
|         |             |         |         |          | 5.0927E-11  | 9452.68 | 24524.2 | 2.59441  |
|         |             |         |         |          | 1.79646E-10 | 13075.8 | 37309.1 | 2.85329  |
|         |             |         |         |          | 1.30945E-11 | 4453.68 | 14164.3 | 3.18036  |
|         |             |         |         |          | 0.000328798 | #DIV/0! | 1080.85 | #DIV/0!  |
| -2.2022 |             |         |         |          |             |         |         |          |
|         | 1.15283E-07 | 1950.63 | 4887.23 | 2.50547  |             |         |         |          |
|         | 1.59721E-08 | 10098.1 | 21080.6 | 2.08758  | 8.79954E-15 | 5521.23 | 18847.6 | 3.41366  |
|         | 1.92794E-05 | 3032.03 | 824.9   | -3.67563 | 0.000084171 | 4930.53 | 1966.9  | -2.50675 |
|         | 7.66253E-08 | 1072.23 | 4137.43 | 3.85873  | 0.000008124 | 1562.45 | 3966.8  | 2.53883  |
|         | 1.09714E-07 | 4200.4  | 10724.2 | 2.55313  | 1.29181E-10 | 2621.08 | 9526.45 | 3.63456  |
|         |             |         |         |          | 9.21895E-06 | 2380.68 | 4912.7  | 2.06357  |
|         |             |         |         |          | 1.5093E-10  | 2584.5  | 5501.33 | 2.12858  |
|         |             |         |         |          | 3.38476E-14 | #DIV/0! | 1635.08 | #DIV/0!  |
| -2.5011 |             |         |         |          |             |         |         |          |
|         | 0.00377572  | 906.85  | #DIV/0! | #DIV/0!  |             |         |         |          |
|         | 0.0110177   | 567.533 | #DIV/0! | #DIV/0!  |             |         |         |          |
|         |             |         |         |          | 9.97851E-05 | 1439.65 | 481     | -2.99304 |
|         |             |         |         |          | 2.29602E-08 | 4655.75 | 10686.7 | 2.29537  |
|         |             |         |         |          | 5.06759E-08 | 4067.55 | 9668.33 | 2.37694  |
|         |             |         |         |          | 1.57744E-09 | 5796.45 | 15868.8 | 2.73768  |
|         |             |         |         |          | 0.00138302  | 1729.18 | 824.75  | -2.09661 |
|         | 8.71361E-09 | 1464.77 | 379.1   | -3.8638  | 2.04902E-08 | 2379.45 | 700.4   | -3.39727 |
|         |             |         |         |          | 0.00124308  | #DIV/0! | 501.467 | #DIV/0!  |
|         |             |         |         |          | 3.21396E-06 | 1910.9  | 894.2   | -2.13699 |
|         |             |         |         |          | 2.73887E-05 | 1211.48 | 476.7   | -2.54138 |
|         |             |         |         |          | 0.000863108 | #DIV/0! | 728.575 | #DIV/0!  |
|         |             |         |         |          | 4.62056E-05 | #DIV/0! | 1719.65 | #DIV/0!  |
|         |             |         |         |          | 1.61508E-10 | 2809.15 | 8703.53 | 3.09828  |
|         | 6.46421E-07 | 6106.35 | 14545.1 | 2.38195  | 8.30535E-12 | 4923.95 | 18588   | 3.77502  |
|         |             |         |         |          | 5.01942E-05 | 1408.4  | 3030.23 | 2.15154  |
| 3.62724 |             |         |         |          |             |         |         |          |
|         | 3.27215E-05 | 784.15  | 1928.35 | 2.45916  |             |         |         |          |
|         | 0.000100443 | 716.65  | 335.325 | -2.13718 |             |         |         |          |
|         |             |         |         |          | 7.10542E-05 | #DIV/0! | 918.85  | #DIV/0!  |
|         |             |         |         |          | 0.000402524 | 1968.73 | 588.525 | -3.34518 |
|         |             |         |         |          |             |         |         |          |
|         | 2.11755E-06 | 1936.65 | 832.9   | -2.32519 |             |         |         |          |
|         | 3.27571E-05 | 2704.9  | 1301.48 | -2.07833 |             |         |         |          |
|         | 9.85546E-05 | 1500.37 | 729.025 | -2.05805 |             |         |         |          |
|         | 1.43402E-06 | 831.45  | #DIV/0! | #DIV/0!  |             |         |         |          |
| -2.014  |             |         |         |          |             |         |         |          |
| -2.3512 | 0.000240808 | 1045.88 | 511.167 | -2.04605 | 0.00813349  | 1294.55 | 634.05  | -2.04172 |
|         |             |         |         |          | 0.000175781 | 2115    | 549.9   | -3.84615 |
| -2.3733 |             |         |         |          |             |         |         |          |
| -2.2895 |             |         |         |          |             |         |         |          |
|         |             |         |         |          | 0.0024009   | #DIV/0! | 1582.77 | #DIV/0!  |
|         |             |         |         |          | 2.98332E-05 | 1153.27 | 2406.45 | 2.08664  |
|         | 7.98219E-05 | 4071.23 | 9355.88 | 2.29805  | 1.40993E-13 | 2522.5  | 11005.4 | 4.36288  |
|         | 0.000759633 | 1191.4  | 3610.23 | 3.03024  | 6.41216E-15 | #DIV/0! | 4029.08 | #DIV/0!  |
|         | 1.78562E-05 | 571.625 | 210.7   | -2.71298 | 9.29257E-05 | 1352.17 | 587.867 | -2.30012 |
|         | 4.07097E-06 | 1208.18 | 452.45  | -2.6703  |             |         |         |          |



|         |             |         |         |          |             |         |         |          |
|---------|-------------|---------|---------|----------|-------------|---------|---------|----------|
|         |             |         |         |          | 0.00264683  | 1014.4  | 468     | -2.16752 |
|         |             |         |         |          | 0.000531416 | #DIV/0! | 1523.75 | #DIV/0!  |
|         |             |         |         |          | 0.00792816  | 865.325 | 403.9   | -2.14242 |
|         |             |         |         |          | 0.00160534  | 1440.98 | 710.2   | -2.02897 |
|         |             |         |         |          | 0.00001138  | #DIV/0! | 1308.8  | #DIV/0!  |
|         |             |         |         |          | 3.17309E-05 | 2043.08 | 957.2   | -2.13443 |
|         |             |         |         |          | 0.0057414   | 1260.63 | 370.333 | -3.40403 |
|         |             |         |         |          | 2.32951E-10 | 5772.53 | 15458.3 | 2.67791  |
|         |             |         |         |          | 1.99346E-10 | 8866.85 | 25910.6 | 2.92218  |
|         |             |         |         |          | 2.26625E-09 | 1078.9  | 3683.3  | 3.41394  |
|         |             |         |         |          | 5.89902E-12 | 2890.43 | 7568.33 | 2.61841  |
|         |             |         |         |          | 2.59315E-20 | 2760.1  | 10458.3 | 3.78911  |
|         |             |         |         |          | 7.76734E-14 | 4183.05 | 16874.1 | 4.03393  |
|         | 0.000035274 | 1098.68 | 429.425 | -2.55848 |             |         |         |          |
|         |             |         |         |          | 0.00311634  | 821.367 | 334.8   | -2.45331 |
|         |             |         |         |          | 0.00376892  | 1422.87 | 409.175 | -3.4774  |
|         |             |         |         |          | 0.0184213   | 981.167 | 332.6   | -2.94999 |
|         |             |         |         |          | 3.41772E-06 | 2049.33 | 4653.13 | 2.27056  |
| #DIV/0! |             |         |         |          | 0.00214085  | 1178.3  | 551.133 | -2.13796 |
| 2.88495 | 2.4224E-06  | 3960.3  | 13340.9 | 3.36866  | 4.13062E-09 | 4199.85 | 18840.7 | 4.48603  |
| 2.22941 | 9.0292E-08  | 13029.8 | 40489.5 | 3.10746  | 1.74125E-11 | 11952.2 | 60351.8 | 5.04942  |
| 2.00488 | 1.63603E-08 | 14626.4 | 37357.4 | 2.55411  | 4.54934E-15 | 10339.4 | 54675.2 | 5.28807  |
| 2.25408 |             |         |         |          |             |         |         |          |
|         | 0.000365759 | 965.25  | 2086.53 | 2.16164  | 0.000476065 | 945.8   | 1956.05 | 2.06814  |
|         | 1.21273E-14 | 10405.9 | 34479.9 | 3.31351  | 9.3794E-15  | 8213    | 26496.5 | 3.22617  |
| 3.04409 | 2.0775E-10  | 2592.88 | 12725.8 | 4.90797  | 2.33691E-08 | 2668.05 | 8683.3  | 3.25455  |
|         |             |         |         |          | 2.39572E-14 | 8509.88 | 33467.8 | 3.93282  |
| 2.03245 |             |         |         |          |             |         |         |          |
|         |             |         |         |          | 0.00755016  | 1750.87 | 483.6   | -3.62049 |
|         |             |         |         |          | 1.54461E-06 | #DIV/0! | 1718.85 | #DIV/0!  |
|         | 2.97913E-13 | 1656.55 | 5900.95 | 3.56219  |             |         |         |          |
|         | 8.73498E-05 | 8686.9  | 1847.05 | -4.70312 | 3.09634E-08 | 10012.1 | 798     | -12.5465 |
|         | 6.48119E-05 | 3751.33 | 1037.35 | -3.61626 | 1.94424E-07 | 3974.2  | 564.15  | -7.04458 |
|         | 2.01612E-05 | 1742.78 | 504.2   | -3.45652 | 1.46658E-06 | 2466.1  | 676.433 | -3.64574 |
| 7.13241 | 5.52188E-07 | 1482.93 | 11356.7 | 7.65828  | 2.34778E-06 | 3120.23 | 17249   | 5.52813  |
|         | 0.00450257  | 1367.63 | 370.633 | -3.68997 | 0.0042645   | 1676.55 | 737.7   | -2.27267 |
|         |             |         |         |          | 4.83987E-05 | 1472.73 | 413.5   | -3.56161 |
|         | 4.50322E-07 | 4064.55 | 1769.88 | -2.29652 |             |         |         |          |
| 3.33163 |             |         |         |          | 1.74005E-05 | 1374.2  | 3667.3  | 2.66868  |
| #DIV/0! |             |         |         |          |             |         |         |          |
|         | 0.000910325 | 652.35  | 222.467 | -2.93235 |             |         |         |          |
| -2.057  |             |         |         |          |             |         |         |          |
|         |             |         |         |          | 0.00148766  | 899.325 | 421.25  | -2.1349  |
|         |             |         |         |          | 0.000495615 | #DIV/0! | 1769.1  | #DIV/0!  |
|         | 0.00012436  | 3800.35 | 1652.5  | -2.29976 | 0.000322508 | 6267.7  | 2949.63 | -2.12491 |
|         |             |         |         |          | 5.24974E-06 | #DIV/0! | 1244    | #DIV/0!  |
|         | 8.46694E-07 | 2685.28 | 5752.33 | 2.14217  |             |         |         |          |
| -2.4193 |             |         |         |          |             |         |         |          |
| -2.2567 |             |         |         |          |             |         |         |          |
|         |             |         |         |          | 0.0159485   | #DIV/0! | 1085.07 | #DIV/0!  |
|         |             |         |         |          | 1.15524E-07 | 2621.33 | 598.9   | -4.37691 |
| -3.6797 | 2.10402E-09 | 3464.88 | 823.675 | -4.2066  | 5.70202E-09 | 2822.88 | 718.875 | -3.9268  |
|         |             |         |         |          | 0.000149876 | 3270.33 | 738.7   | -4.42714 |
|         |             |         |         |          | 0.000590497 | 2013.8  | 564.15  | -3.56962 |
| 3.30424 | 6.2998E-09  | 1275.03 | 4858.85 | 3.81076  | 4.26442E-05 | 2322.03 | 5078.03 | 2.1869   |
| 5.10895 | 3.39557E-11 | 850.175 | 5646.45 | 6.64151  | 4.73645E-10 | 1486.28 | 7665.53 | 5.15754  |
|         |             |         |         |          | 0.00309933  | 2136.13 | 407.6   | -5.24076 |
|         |             |         |         |          | 0.00231688  | #DIV/0! | 1017.43 | #DIV/0!  |
|         | 1.01806E-06 | 6645.53 | 13493.7 | 2.03049  | 1.77691E-15 | 2106.53 | 8886.58 | 4.21858  |
|         |             |         |         |          | 1.30401E-05 | 1038.9  | 2544.23 | 2.44896  |
|         | 3.22077E-06 | 2703.55 | 5708.43 | 2.11146  | 1.09377E-09 | 1950.5  | 6250.83 | 3.20473  |
|         |             |         |         |          | 2.07111E-05 | #DIV/0! | 880.225 | #DIV/0!  |
|         | 0.000944196 | 935.625 | 1874.9  | 2.0039   | 8.00081E-10 | #DIV/0! | 2437.25 | #DIV/0!  |

|         |             |         |         |          |             |         |         |          |
|---------|-------------|---------|---------|----------|-------------|---------|---------|----------|
|         |             |         |         |          | 0.00331322  | 2125.53 | 980     | -2.16891 |
|         |             |         |         |          | 3.74438E-05 | 1237.43 | 606.533 | -2.04017 |
|         |             |         |         |          | 1.84188E-12 | 5309.2  | 12413.1 | 2.33803  |
|         |             |         |         |          | 7.63945E-13 | 4870.23 | 12747.7 | 2.61747  |
|         |             |         |         |          | 8.16499E-06 | 1890.33 | 810.025 | -2.33366 |
|         | 0.00121276  | 778.875 | 306.7   | -2.53953 |             |         |         |          |
| -2.1618 |             |         |         |          |             |         |         |          |
|         |             |         |         |          | 8.26745E-12 | 13413.7 | 40739.9 | 3.03718  |
|         |             |         |         |          | 1.08579E-11 | 4505.25 | 16260.5 | 3.60922  |
|         |             |         |         |          | 6.83161E-11 | 10935.3 | 29910.7 | 2.73523  |
|         |             |         |         |          | 4.78762E-10 | 13276.7 | 39694.9 | 2.98982  |
|         |             |         |         |          | 2.14002E-08 | 3187.93 | 7218.38 | 2.26428  |
|         |             |         |         |          | 5.17184E-12 | 15804.4 | 38868.6 | 2.45936  |
|         |             |         |         |          | 5.27916E-07 | 2060.28 | 496.75  | -4.14751 |
|         |             |         |         |          | 6.52585E-07 | 1536.65 | 522.45  | -2.94124 |
|         |             |         |         |          | 2.88387E-17 | 6044.7  | 18679.8 | 3.09028  |
|         |             |         |         |          | 2.27577E-11 | 2344.15 | 7670.1  | 3.27202  |
|         |             |         |         |          | 1.69474E-07 | 18102.7 | 8883.8  | -2.03772 |
|         |             |         |         |          | 2.76054E-14 | 6373.1  | 24203.4 | 3.79774  |
|         | 3.41827E-06 | 5443.5  | 2211.43 | -2.46153 | 2.4879E-09  | 5685.33 | 1618.03 | -3.51374 |
|         | 1.52296E-05 | 8198.88 | 4086.75 | -2.00621 | 7.19554E-08 | 8209.88 | 3406.25 | -2.41024 |
|         |             |         |         |          | 1.74896E-08 | 6437.28 | 2706.85 | -2.37814 |
|         |             |         |         |          | 9.47798E-11 | 12570.6 | 34038.1 | 2.70776  |
|         |             |         |         |          | 4.62543E-11 | 9415.1  | 28630.5 | 3.04091  |
| -2.0415 | 2.05232E-07 | 9138.78 | 4526.83 | -2.0188  |             |         |         |          |
| -2.1702 |             |         |         |          |             |         |         |          |
|         |             |         |         |          | 2.91935E-15 | 5317.48 | 20448.5 | 3.84553  |
|         | 0.00306285  | 656.2   | 1697.85 | 2.5874   | 0.00040777  | #DIV/0! | 1173.25 | #DIV/0!  |
|         | 0.0120849   | 1133.4  | 2932.95 | 2.58774  | 0.0158692   | #DIV/0! | 1743.78 | #DIV/0!  |
|         |             |         |         |          | 0.000577714 | #DIV/0! | 1869.25 | #DIV/0!  |
|         |             |         |         |          | 1.69376E-05 | 1878.98 | 611     | -3.07525 |
|         |             |         |         |          | 0.00687083  | 1777.08 | 848.5   | -2.09437 |
| -2.3789 |             |         |         |          |             |         |         |          |
|         | 0.0118944   | 998     | 329.6   | -3.02791 |             |         |         |          |
|         | 0.00435376  | 1663.55 | 643.2   | -2.58637 |             |         |         |          |
| 2.49929 | 1.02081E-15 | 6881.65 | 28074.6 | 4.07963  | 3.87227E-12 | 6954.18 | 18567.6 | 2.67     |
|         |             |         |         |          | 2.67083E-05 | 2337.73 | 564.7   | -4.13976 |
|         |             |         |         |          | 0.00758172  | 1242.17 | 315.133 | -3.94172 |
| 5.57824 | 1.26926E-08 | 637.1   | 5054.18 | 7.9331   | 4.9305E-07  | 1731.3  | 5621.4  | 3.24692  |
| -2.0333 | 9.42349E-06 | 1140.23 | 437.475 | -2.60638 | 4.67728E-08 | 1196.75 | 373.85  | -3.20115 |
|         |             |         |         |          | 1.86342E-08 | 1377.47 | 299.5   | -4.59922 |
| -2.4078 | 2.14398E-08 | 3083.2  | 935.5   | -3.29578 | 1.10219E-08 | 2779.98 | 748.175 | -3.71567 |
| -2.4318 | 4.77675E-08 | 2820    | 782.65  | -3.60314 | 2.94202E-08 | 2328.15 | 683.15  | -3.40796 |
|         |             |         |         |          | 0.000942654 | 1309.9  | 486.75  | -2.69111 |
|         |             |         |         |          | 0.000628051 | #DIV/0! | 1523.58 | #DIV/0!  |
| -2.2868 | 1.30248E-07 | 10031.3 | 4301.38 | -2.33212 |             |         |         |          |
|         | 3.94199E-07 | 10436.7 | 5037.8  | -2.07168 |             |         |         |          |
| -2.243  |             |         |         |          |             |         |         |          |
| -2.0678 |             |         |         |          |             |         |         |          |
|         |             |         |         |          | 5.20573E-05 | #DIV/0! | 2664.95 | #DIV/0!  |
| -2.4692 |             |         |         |          |             |         |         |          |
|         |             |         |         |          | 0.000119142 | 1084.85 | 521.8   | -2.07905 |
|         |             |         |         |          | 9.28541E-18 | 13286.6 | 37472.6 | 2.82032  |
| 3.46834 | 5.11511E-07 | 2109.78 | 8142.8  | 3.85956  |             |         |         |          |
| -2.6671 | 1.01098E-05 | 2537.35 | 1146.85 | -2.21245 | 7.90108E-07 | 1800.15 | 794.175 | -2.26669 |
|         | 0.00315382  | 975.375 | 228.7   | -4.26487 |             |         |         |          |
| -2.0345 | 9.11523E-09 | 1450.8  | 340.25  | -4.26392 | 1.0432E-09  | 2356.15 | 510     | -4.6199  |
|         |             |         |         |          | 2.84278E-13 | 2723.58 | 6332.13 | 2.32493  |
|         |             |         |         |          | 3.28163E-10 | 3211.83 | 9393.63 | 2.9247   |
|         |             |         |         |          | 0.0115193   | #DIV/0! | 1720.85 | #DIV/0!  |
|         | 1.37206E-09 | 3014.55 | 7964.48 | 2.64201  | 7.67652E-11 | 2219.95 | 6786.7  | 3.05714  |
|         | 1.23859E-10 | 4853.3  | 12751.9 | 2.62746  | 2.5911E-13  | 3231.03 | 10439.6 | 3.23104  |
|         | 2.15215E-06 | 6882.38 | 2692.85 | -2.5558  | 6.82027E-05 | 13500.9 | 5327.95 | -2.53397 |



|         |             |         |         |          |             |         |         |          |
|---------|-------------|---------|---------|----------|-------------|---------|---------|----------|
|         | 0.000375534 | 1221.35 | 3019.85 | 2.47255  | 7.53403E-05 | 953.8   | 2720.08 | 2.85183  |
|         |             |         |         |          | 0.00325228  | #DIV/0! | 1406.47 | #DIV/0!  |
|         |             |         |         |          | 4.42828E-06 | 1793.73 | 551.467 | -3.25264 |
|         | 0.000148883 | 1514.78 | 730.05  | -2.07489 | 1.96258E-05 | 1700.38 | 744.825 | -2.28292 |
|         | 9.00447E-09 | 6971.6  | 18401   | 2.63943  | 1.11971E-12 | 3299.58 | 12279.3 | 3.72148  |
|         |             |         |         |          | 0.000119338 | #DIV/0! | 849.7   | #DIV/0!  |
|         |             |         |         |          | 1.81142E-07 | 1729.33 | 4004.6  | 2.3157   |
| -2.4903 | 5.12657E-08 | 1566.4  | 358.05  | -4.37481 |             |         |         |          |
|         | 1.41265E-07 | 821.125 | 225.6   | -3.63974 | 0.000222636 | 1191.63 | 531.125 | -2.24359 |
| -2.1234 | 2.4683E-07  | 1248.05 | 618.433 | -2.01808 | 4.76485E-08 | 1448.1  | 531.25  | -2.72584 |
|         |             |         |         |          | 0.000554918 | #DIV/0! | 1285.6  | #DIV/0!  |
|         | 2.97269E-06 | 23225.1 | 53641.3 | 2.30962  | 1.11829E-10 | 11130.4 | 39835.7 | 3.579    |
|         | 0.000140909 | 2444.95 | 6785.75 | 2.77541  | 7.78493E-06 | #DIV/0! | 7595.95 | #DIV/0!  |
| -2.4807 | 5.46726E-09 | 4867    | 2067.15 | -2.35445 |             |         |         |          |
|         | 0.000112202 | 1440    | 3211.13 | 2.22995  | 3.87833E-09 | 818.8   | 3016.88 | 3.68451  |
| 2.17745 | 3.04608E-06 | 2238.73 | 5085.88 | 2.27177  | 7.91661E-13 | 986.167 | 4675.18 | 4.74076  |
|         | 3.87477E-12 | 5614.15 | 12107.1 | 2.15652  |             |         |         |          |
|         |             |         |         |          | 9.98117E-08 | 2175.9  | 533.475 | -4.07873 |
|         |             |         |         |          | 1.78825E-06 | 2548.88 | 722.067 | -3.52997 |
|         |             |         |         |          | 1.891E-08   | 968.425 | #DIV/0! | #DIV/0!  |
|         | 0.000264814 | 400.7   | 825.375 | 2.05983  |             |         |         |          |
|         | 7.45759E-06 | 999.225 | 2144.78 | 2.14644  |             |         |         |          |
|         |             |         |         |          | 3.32539E-09 | 2074.23 | 957.9   | -2.16539 |
| -2.0293 | 3.73182E-05 | 950.85  | 375.067 | -2.53515 | 0.000275739 | 887.425 | 410.7   | -2.16076 |
|         | 0.000752642 | 643.2   | #DIV/0! | #DIV/0!  |             |         |         |          |
|         | 1.43314E-05 | 3887.4  | 1471.1  | -2.64251 | 3.08176E-05 | 5566    | 2223.48 | -2.50329 |
| -4.8644 | 0.00422967  | 1870.03 | 913.8   | -2.04644 |             |         |         |          |
|         |             |         |         |          | 8.30013E-06 | 2386.28 | 902.275 | -2.64473 |
|         | 1.09067E-06 | 4395.65 | 1585.3  | -2.77276 |             |         |         |          |
| 2.54757 | 3.72702E-09 | 4049.25 | 11113.2 | 2.74451  | 1.05088E-08 | 3497.65 | 9260.55 | 2.64765  |
| 2.46335 | 7.49519E-15 | 2879.53 | 9593.93 | 3.33177  | 3.51726E-13 | 2418.05 | 6713.5  | 2.77641  |
| 2.40278 | 1.3498E-08  | 2667.53 | 6826.38 | 2.55907  | 3.17118E-09 | 2426.3  | 6880.15 | 2.83566  |
| 2.64    | 1.10247E-07 | 4122.43 | 10076.3 | 2.44425  | 8.3784E-10  | 2847.13 | 9027.45 | 3.17072  |
|         | 0.000503001 | 1198.5  | #DIV/0! | #DIV/0!  |             |         |         |          |
| -2.474  |             |         |         |          |             |         |         |          |
|         |             |         |         |          | 4.27556E-13 | 3324.93 | 8463.8  | 2.54556  |
|         | 4.18628E-05 | 3220.6  | 1515.65 | -2.1249  | 3.89991E-06 | 5923.1  | 2533.58 | -2.33784 |
|         |             |         |         |          | 1.88423E-07 | 4091.15 | 9118.23 | 2.22877  |
|         |             |         |         |          | 1.55313E-07 | 4142.98 | 10068.5 | 2.43025  |
|         |             |         |         |          | 0.0129658   | 982.067 | #DIV/0! | #DIV/0!  |
|         | 1.34241E-07 | 32806.7 | 12933.1 | -2.53665 | 9.41272E-06 | 60098.7 | 29646.6 | -2.02717 |
|         |             |         |         |          | 1.05813E-06 | 655.7   | 2601.93 | 3.96816  |
| 5.01293 | 4.73046E-12 | 1073.4  | 5681.3  | 5.29281  | 2.08018E-14 | 958.2   | 6260.4  | 6.5335   |
| 5.79361 | 6.86799E-11 | 961.975 | 6938.98 | 7.21326  | 5.39536E-11 | 1138.57 | 8988.23 | 7.89433  |
|         |             |         |         |          | 0.000187325 | 344.1   | 1289.15 | 3.74644  |
|         | 0.00215252  | 665.567 | #DIV/0! | #DIV/0!  |             |         |         |          |
|         |             |         |         |          | 0.000687841 | 714.6   | 186.9   | -3.82343 |
|         |             |         |         |          | 3.28131E-11 | 1161.35 | 4386.8  | 3.77733  |
| -2.4082 | 0.000573452 | 4949.65 | 1719.37 | -2.87876 |             |         |         |          |
|         | 4.75217E-05 | 977.967 | 318.4   | -3.0715  |             |         |         |          |
|         |             |         |         |          | 0.00848173  | 1004.3  | 410.775 | -2.44489 |
|         | 3.21546E-06 | 751.725 | 234.467 | -3.20611 | 3.35042E-05 | 1127.53 | 450.833 | -2.50098 |
|         | 9.65568E-05 | 1128.78 | 505.5   | -2.23299 |             |         |         |          |
|         | 1.54956E-05 | 3213.7  | 1596.3  | -2.01322 |             |         |         |          |
|         | 1.02778E-07 | 6251.88 | 14160.9 | 2.26507  | 2.73851E-07 | 4423.35 | 9163.48 | 2.07161  |
|         | 2.24294E-08 | 9720.3  | 20972.4 | 2.15758  | 6.49595E-11 | 6709.38 | 16120.6 | 2.40269  |
|         |             |         |         |          | 3.82585E-08 | 1077.1  | 2681.25 | 2.48932  |
|         |             |         |         |          | 0.00268926  | 1081.63 | #DIV/0! | #DIV/0!  |
|         |             |         |         |          | 6.84423E-09 | 8476.68 | 18069.7 | 2.1317   |
|         |             |         |         |          | 0.000617258 | 3120.65 | 1315.63 | -2.37199 |
|         |             |         |         |          | 2.2267E-08  | #DIV/0! | 1534.78 | #DIV/0!  |

|             |             |         |          |             |         |         |          |
|-------------|-------------|---------|----------|-------------|---------|---------|----------|
|             |             |         |          | 0.00242369  | 1044.6  | 393.933 | -2.65172 |
|             |             |         |          | 0.00140644  | 916.967 | 348.7   | -2.62967 |
| 2.96948E-05 | 988.125     | 443.55  | -2.22776 | 1.98753E-05 | 1875.9  | 736.55  | -2.54687 |
|             |             |         |          | 0.00863507  | 1037.33 | 469.867 | -2.20772 |
| 0.00595611  | 1209.3      | 494.4   | -2.446   |             |         |         |          |
|             |             |         |          | 0.00419618  | 656.5   | #DIV/0! | #DIV/0!  |
|             |             |         |          | 3.97867E-05 | #DIV/0! | 2948.8  | #DIV/0!  |
| 0.00368869  | 612.125     | #DIV/0! | #DIV/0!  | 0.0052194   | 1075.87 | 287.8   | -3.73824 |
|             |             |         |          | 0.0136831   | 785.1   | 221.6   | -3.54287 |
| 4.47311E-05 | 1605.23     | 762.65  | -2.1048  | 6.71125E-06 | 2330.6  | 996.425 | -2.33896 |
|             |             |         |          | 0.000218765 | 3863.3  | 1761.43 | -2.19328 |
|             |             |         |          | 0.000444237 | 3324.28 | 8225.73 | 2.47444  |
| 0.000132993 | 804.975     | 2046.38 | 2.54216  |             |         |         |          |
| 3.57459E-08 | 1196.83     | #DIV/0! | #DIV/0!  |             |         |         |          |
|             |             |         |          | 0.000632096 | 1536.6  | 727.025 | -2.11354 |
|             |             |         |          | 0.00212273  | 1109.43 | 347.5   | -3.19259 |
|             |             |         |          | 1.76523E-05 | 4312.68 | 1601.53 | -2.69286 |
| 0.00625503  | 1131.7      | 265.75  | -4.25851 | 0.00418155  | 2529.33 | 705.4   | -3.58566 |
| 0.000136522 | 612.567     | 155.3   | -3.94441 |             |         |         |          |
| 0.000840106 | 2555.48     | 1222.65 | -2.09011 |             |         |         |          |
|             |             |         |          | 3.54961E-18 | 5744.48 | 29759.7 | 5.18057  |
| 0.000673389 | 549.7       | 246.35  | -2.23138 | 4.72387E-06 | 1058.83 | 375.567 | -2.81927 |
|             |             |         |          | 7.36055E-14 | 5885.68 | 16624.8 | 2.82462  |
| 0.000036719 | 1394.28     | 454.1   | -3.07041 | 2.35684E-06 | 2121.6  | 839.333 | -2.52772 |
| 2.86589E-12 | 1490.53     | 6217.33 | 4.17123  | 2.38908E-09 | 1504.33 | 3892.93 | 2.58782  |
| 7.63191E-10 | 662.925     | 2667.8  | 4.02429  |             |         |         |          |
|             |             |         |          | 0.00066889  | 996.9   | 389.433 | -2.55987 |
|             |             |         |          | 6.29139E-08 | 3152.25 | 7586.25 | 2.40661  |
|             |             |         |          | 1.2456E-07  | 4453.6  | 11609.5 | 2.60676  |
|             |             |         |          | 3.09988E-05 | 1742.93 | 677.15  | -2.57393 |
|             |             |         |          | 0.0022429   | 1948.75 | 571     | -3.41287 |
| -2.1748     | 0.000253648 | 3709.13 | 1832.63  | -2.02394    |         |         |          |
| 3.61323     | 6.43637E-11 | 12572   | 58257.5  | 4.6339      |         |         |          |
| 3.30975     | 1.25515E-11 | 5042.88 | 20136.3  | 3.99301     |         |         |          |
|             |             |         |          |             |         |         |          |
| 2.29132     |             |         |          |             |         |         |          |
|             |             |         |          | 6.8108E-07  | 3595.5  | 8358.75 | 2.32478  |
|             |             |         |          |             |         |         |          |
|             |             |         |          | 0.000347156 | #DIV/0! | 1679.6  | #DIV/0!  |
|             |             |         |          | 0.00193997  | 1410.4  | 531.8   | -2.65212 |
|             |             |         |          | 6.11181E-07 | 1968.53 | 484.5   | -4.063   |
|             |             |         |          | 1.27677E-05 | 1971.28 | 494.05  | -3.99003 |
|             |             |         |          | 3.68878E-08 | 2332.38 | 695     | -3.35594 |
|             |             |         |          | 1.76461E-14 | 2995.85 | 7190.1  | 2.40002  |
|             |             |         |          | 0.00535749  | #DIV/0! | 1878.88 | #DIV/0!  |
|             |             |         |          | 0.020877    | #DIV/0! | 1090.07 | #DIV/0!  |
|             |             |         |          | 0.00936519  | 527.567 | 261.9   | -2.01438 |
| 0.000254648 | 867.075     | 380.85  | -2.27668 |             |         |         |          |
| 1.35546E-07 | 2327.53     | 1120.48 | -2.07727 |             |         |         |          |
|             |             |         |          | 1.83158E-11 | 2899.53 | 1155.4  | -2.50955 |
|             |             |         |          | 3.25169E-05 | 1326.75 | 629.175 | -2.10871 |
|             |             |         |          |             |         |         |          |
| 2.21118     |             |         |          |             |         |         |          |
|             |             |         |          | 8.41762E-11 | 728     | 1674.48 | 2.3001   |
|             |             |         |          | 2.99279E-12 | #DIV/0! | 2153.25 | #DIV/0!  |
|             |             |         |          | 0.00130593  | #DIV/0! | 1732.73 | #DIV/0!  |
|             |             |         |          |             |         |         |          |
|             |             |         |          | 0.000478356 | 877.25  | 426.833 | -2.05525 |
| 6.15532E-06 | 3549.6      | 1062.25 | -3.34159 |             |         |         |          |
|             |             |         |          | 4.74587E-07 | 6498.15 | 1601.65 | -4.05716 |
|             |             |         |          | 0.00272784  | 2250    | 1022.2  | -2.20113 |
|             |             |         |          | 0.00220724  | 1836.7  | 528.725 | -3.47383 |
|             |             |         |          | 0.0100229   | 1210.67 | 402.6   | -3.00712 |
|             |             |         |          | 0.00174486  | 1281.1  | #DIV/0! | #DIV/0!  |
| 0.00082319  | 869.7       | 414.267 | -2.09937 | 0.00181717  | 2344.13 | 861.325 | -2.72154 |
|             |             |         |          | 0.000575161 | 979.25  | 404.425 | -2.42134 |
|             |             |         |          |             |         |         |          |
| -2.5398     | 8.49945E-07 | 1045.4  | 266.6    | -3.92123    |         |         |          |

|         |             |         |         |          |             |         |         |          |
|---------|-------------|---------|---------|----------|-------------|---------|---------|----------|
|         |             |         |         |          | 2.50337E-09 | #DIV/0! | 5695    | #DIV/0!  |
| 9.45343 | 1.58026E-13 | 1739.55 | 25029.8 | 14.3887  | 2.8966E-16  | 2305.5  | 51652   | 22.4038  |
| 8.77014 | 7.99107E-08 | #DIV/0! | 12013.3 | #DIV/0!  | 4.19564E-12 | #DIV/0! | 25968.6 | #DIV/0!  |
| #DIV/0! | 6.45927E-08 | #DIV/0! | 1549.6  | #DIV/0!  | 2.7261E-09  | #DIV/0! | 4343.03 | #DIV/0!  |
| #DIV/0! | 2.82942E-05 | #DIV/0! | 2413.53 | #DIV/0!  | 0.000162492 | #DIV/0! | 4919.68 | #DIV/0!  |
|         |             |         |         |          | 0.00143725  | #DIV/0! | 655.6   | #DIV/0!  |
|         | 0.000977497 | 629.4   | 273.5   | -2.30128 |             |         |         |          |
|         |             |         |         |          | 0.000108184 | 2442.18 | 5687.48 | 2.32886  |
|         |             |         |         |          | 2.06181E-05 | #DIV/0! | 1243.5  | #DIV/0!  |
|         |             |         |         |          | 0.000608626 | 2197.17 | 1061    | -2.07085 |
|         |             |         |         |          | 0.00350682  | 1235.63 | 598.1   | -2.06592 |
|         |             |         |         |          | 4.73243E-08 | 1239.67 | 4964.23 | 4.00448  |
|         | 0.00467621  | 2850.85 | 6311.53 | 2.21391  | 9.46861E-11 | #DIV/0! | 8314.23 | #DIV/0!  |
|         | 0.0117308   | 586.425 | 282.6   | -2.07511 | 0.00273582  | 870.233 | 369.1   | -2.35772 |
|         | 0.00123591  | 1350.98 | 638.2   | -2.11685 |             |         |         |          |
| -2.3166 |             |         |         |          |             |         |         |          |
|         | 8.32511E-05 | 1820.68 | 869.275 | -2.09448 |             |         |         |          |
|         | 0.000140813 | 1246.95 | 555.1   | -2.24635 | 5.5617E-08  | 2836.98 | 763.675 | -3.7149  |
|         | 0.0146189   | 712.6   | 324.2   | -2.19803 |             |         |         |          |
|         | 0.00582476  | 1096.08 | 534.1   | -2.05219 |             |         |         |          |
|         |             |         |         |          | 0.00750834  | 1118.23 | 513.9   | -2.17596 |
|         | 0.0100731   | 1050.05 | 507.775 | -2.06794 | 0.00831832  | 1473.2  | 696.25  | -2.11591 |
|         |             |         |         |          | 1.26915E-08 | 1550.15 | 436.8   | -3.54888 |
|         | 8.57704E-06 | 2238.55 | 1113.63 | -2.01015 |             |         |         |          |
|         | 1.46043E-07 | 713.45  | 307.65  | -2.31903 | 4.33936E-05 | 905.6   | #DIV/0! | #DIV/0!  |
|         |             |         |         |          | 2.39892E-08 | 1383.33 | 375.7   | -3.68199 |
| -2.157  |             |         |         |          |             |         |         |          |
| -2.9014 | 9.23136E-07 | 2413.7  | 665.1   | -3.62908 | 5.78253E-10 | 3339.45 | 618.85  | -5.39622 |
| -2.9935 | 2.1614E-09  | 1801.8  | 340.925 | -5.28503 | 3.15431E-06 | 1466.8  | 458.025 | -3.20245 |
|         |             |         |         |          | 0.00875285  | 802.633 | 235.05  | -3.41473 |
|         |             |         |         |          | 0.0106081   | 1045.58 | 508.2   | -2.05741 |
|         |             |         |         |          | 0.00442704  | 1082    | 420.833 | -2.57109 |
|         | 0.00177168  | 973.3   | 351.5   | -2.76899 | 0.000220673 | 2300.85 | 707.967 | -3.24994 |
|         |             |         |         |          | 0.00548928  | 780.4   | 380.9   | -2.04883 |
|         | 0.000436217 | 1100.43 | 539.45  | -2.0399  |             |         |         |          |
|         | 1.83056E-07 | 4556.88 | 1539.4  | -2.96016 | 8.1505E-08  | 9887.53 | 3069.75 | -3.22095 |
|         |             |         |         |          | 4.49592E-05 | 3402.48 | 1494.93 | -2.27602 |
|         | 0.000562786 | 668.6   | #DIV/0! | #DIV/0!  |             |         |         |          |
| -2.038  |             |         |         |          |             |         |         |          |
|         |             |         |         |          | 0.000772789 | #DIV/0! | 902.6   | #DIV/0!  |
|         |             |         |         |          | 0.00382215  | 3041.2  | 1335.95 | -2.27643 |
|         |             |         |         |          | 0.00146594  | 957.533 | 432.325 | -2.21485 |
|         | 0.000175309 | 834.75  | 273.3   | -3.05434 | 0.0124422   | 1422.53 | 614.875 | -2.31352 |
|         |             |         |         |          | 0.000812251 | #DIV/0! | 1125.13 | #DIV/0!  |
|         | 7.61373E-06 | 595.3   | #DIV/0! | #DIV/0!  | 1.14987E-05 | 1320.05 | 372.767 | -3.54122 |
|         | 0.00116406  | 772.2   | #DIV/0! | #DIV/0!  |             |         |         |          |
|         | 4.29984E-06 | 945.125 | 426     | -2.2186  | 8.3037E-06  | 1506.73 | 591.05  | -2.54923 |
|         |             |         |         |          | 7.02273E-05 | 1044.28 | 438.033 | -2.38401 |
|         |             |         |         |          | 0.0193187   | #DIV/0! | 632.367 | #DIV/0!  |
|         |             |         |         |          | 0.00980467  | 729.833 | 232.6   | -3.13772 |
|         | 0.000220681 | 516.633 | #DIV/0! | #DIV/0!  |             |         |         |          |
|         | 0.00226591  | 1274.67 | 405.6   | -3.14267 | 0.00166333  | #DIV/0! | 1260.93 | #DIV/0!  |
|         | 2.42734E-08 | 1162.55 | 400.5   | -2.90275 | 0.0071083   | 2616.48 | 1240    | -2.11006 |
|         | 1.83004E-09 | 859.45  | 382.2   | -2.24869 | 1.14528E-09 | 2262    | 701     | -3.22682 |
| #DIV/0! |             |         |         |          |             |         |         |          |
|         |             |         |         |          | 0.00109271  | 1020.88 | #DIV/0! | #DIV/0!  |
|         |             |         |         |          | 0.00819167  | 1185.9  | 558.133 | -2.12476 |
|         | 0.00554138  | 611.2   | 230.167 | -2.65547 |             |         |         |          |
|         |             |         |         |          | 0.0154638   | 519.433 | 163.2   | -3.1828  |
|         | 0.00092318  | 610.8   | 293     | -2.08464 |             |         |         |          |
|         | 3.28862E-05 | 1180.83 | 545.9   | -2.16308 | 0.000126218 | 1546.38 | 725     | -2.13293 |
|         |             |         |         |          | 0.00429332  | 1140.23 | 414.9   | -2.74821 |

|         |             |         |         |          |             |         |         |          |
|---------|-------------|---------|---------|----------|-------------|---------|---------|----------|
|         |             |         |         |          | 0.00024744  | 1134.33 | 293.1   | -3.8701  |
|         | 2.43287E-05 | #DIV/0! | 825.875 | #DIV/0!  | 0.000204575 | #DIV/0! | 1390.5  | #DIV/0!  |
| 4.35747 | 7.62007E-11 | 2550.58 | 9331.45 | 3.65857  | 6.52229E-08 | 2903.53 | 6982.43 | 2.40481  |
| 4.8358  | 2.38061E-10 | 2395.63 | 11692.8 | 4.8809   | 3.62264E-07 | 3087.6  | 9459.25 | 3.06363  |
| 5.45046 | 5.51149E-07 | 2751.33 | 7403.33 | 2.69082  |             |         |         |          |
| 6.25945 | 1.99469E-06 | 974.933 | 3445.23 | 3.53381  |             |         |         |          |
| 4.36576 | 1.2017E-10  | 2107.58 | 7772.63 | 3.68795  |             |         |         |          |
| 2.65284 |             |         |         |          |             |         |         |          |
|         | 1.54482E-09 | 4558.48 | 2253.05 | -2.02325 |             |         |         |          |
|         | 0.000212231 | 1328.48 | 645.3   | -2.05869 |             |         |         |          |
| 2.59937 |             |         |         |          |             |         |         |          |
|         | 0.0020085   | 387.6   | 958.3   | 2.47239  | 8.85248E-09 | #DIV/0! | 1093.13 | #DIV/0!  |
|         | 2.61831E-05 | 521.675 | 1065.58 | 2.0426   |             |         |         |          |
|         |             |         |         |          | 0.020875    | 2897.73 | 510.95  | -5.67125 |
|         | 0.000287818 | 1656.6  | 516.7   | -3.20612 | 7.89611E-05 | 3688.23 | 1108.1  | -3.32842 |
|         |             |         |         |          | 0.000195232 | 1250.87 | #DIV/0! | #DIV/0!  |
|         |             |         |         |          | 0.00093835  | 905.9   | #DIV/0! | #DIV/0!  |
|         |             |         |         |          | 6.12673E-05 | 1003.8  | 382.15  | -2.62672 |
|         |             |         |         |          | 3.63616E-05 | 1074.17 | 318.3   | -3.3747  |
|         | 3.86404E-07 | 885.9   | 258.25  | -3.4304  | 1.58823E-05 | 1582.03 | 562.375 | -2.81311 |
|         |             |         |         |          | 0.0030183   | 32633.2 | 11014.9 | -2.96264 |
| -2.4401 |             |         |         |          |             |         |         |          |
| -2.3627 |             |         |         |          | 0.00184766  | 2171.53 | 4378.48 | 2.01631  |
| -2.3086 | 3.65016E-07 | 1160.18 | 483.7   | -2.39854 | 2.87502E-06 | 1219.75 | 536.95  | -2.27163 |
|         | 1.74249E-07 | 1031.5  | 400.533 | -2.57532 |             |         |         |          |
| -2.2001 |             |         |         |          |             |         |         |          |
| -2.8715 | 1.51649E-06 | 1076.58 | 319.75  | -3.36693 |             |         |         |          |
| -2.1036 | 0.000001584 | 2453.58 | 1089    | -2.25305 |             |         |         |          |
| -2.3227 |             |         |         |          |             |         |         |          |
|         |             |         |         |          | 3.98992E-10 | 2038.17 | 6216.23 | 3.04991  |
|         | 0.000239489 | 1580.03 | 649.7   | -2.43193 |             |         |         |          |
| 2.04611 |             |         |         |          |             |         |         |          |
|         | 0.0108306   | 537.167 | #DIV/0! | #DIV/0!  |             |         |         |          |
|         |             |         |         |          | 2.32589E-05 | 842.85  | 283.6   | -2.97197 |
|         |             |         |         |          | 0.000594739 | 1345.23 | 621.4   | -2.16484 |
|         |             |         |         |          | 6.5286E-08  | 2972.33 | 1338.18 | -2.22118 |
|         | 0.0101702   | 1488.13 | 713.9   | -2.0845  |             |         |         |          |
|         | 0.00546509  | 1817.7  | 756.2   | -2.40373 |             |         |         |          |
|         | 0.000424243 | 1773.55 | 636.875 | -2.78477 | 0.00221881  | 1502.2  | 3698.33 | 2.46194  |
|         |             |         |         |          | 0.000732777 | 2398.77 | 884.3   | -2.71262 |
|         |             |         |         |          | 0.00829531  | 1164.93 | 349.733 | -3.33092 |
| -2.0157 | 5.48986E-08 | 923.075 | 388.7   | -2.37477 | 1.27518E-10 | 1575.58 | 516.475 | -3.05063 |
|         |             |         |         |          | 0.00602194  | 1183.77 | 508.625 | -2.32739 |
|         |             |         |         |          | 0.020112    | 1108.25 | 428.9   | -2.58394 |
|         |             |         |         |          | 1.12532E-10 | 2439.85 | 5753.63 | 2.35819  |
| -2.4295 |             |         |         |          | 9.54387E-05 | 2565.55 | 1023.7  | -2.50615 |
|         | 4.60931E-05 | 643.267 | 239.1   | -2.69037 | 0.00014895  | 979.05  | 435.6   | -2.24759 |
|         | 0.000179145 | 788.7   | #DIV/0! | #DIV/0!  | 0.00994722  | 1523.5  | 458.7   | -3.32134 |
|         |             |         |         |          | 0.016652    | 1246.85 | 584.6   | -2.13283 |
|         | 0.000171258 | 1328.28 | 475.9   | -2.79108 |             |         |         |          |
|         |             |         |         |          | 2.28098E-05 | 858.875 | 323.55  | -2.65454 |
|         | 0.000235191 | 979.825 | 476.725 | -2.05533 | 1.04512E-06 | 1602.18 | 607.733 | -2.63631 |
|         | 9.42756E-06 | 3418.73 | 1422.43 | -2.40345 |             |         |         |          |
| -2.2481 |             |         |         |          | 7.92831E-14 | 1961.45 | #DIV/0! | #DIV/0!  |
|         | 2.42166E-05 | 899.875 | 280.8   | -3.20468 | 3.4709E-06  | 2466.68 | 690.45  | -3.57256 |
|         |             |         |         |          | 5.86441E-05 | #DIV/0! | 1817.33 | #DIV/0!  |
|         |             |         |         |          |             |         |         |          |
|         |             |         |         |          | 6.10454E-06 | 4163.88 | 9092.85 | 2.18375  |
|         |             |         |         |          | 1.20077E-06 | 5286.18 | 12468.5 | 2.35869  |
|         |             |         |         |          | 3.31573E-06 | #DIV/0! | 668.7   | #DIV/0!  |

|             |             |         |          |             |             |         |          |
|-------------|-------------|---------|----------|-------------|-------------|---------|----------|
| 1.53824E-05 | 7290.25     | 3351.2  | -2.17541 |             |             |         |          |
| 0.000646675 | 1420.08     | 595.8   | -2.38348 | 3.86226E-05 | 2826.6      | 945.125 | -2.99072 |
| 0.00355694  | #DIV/0!     | 1328.13 | #DIV/0!  |             |             |         |          |
|             |             |         |          | 1.71596E-10 | 1670.33     | 3889.55 | 2.32862  |
|             |             |         |          | 2.18889E-07 | 3346.93     | 7075    | 2.11388  |
| 0.000102897 | 2141.05     | 4690.48 | 2.19074  | 4.31288E-05 | 1936.6      | 4175.85 | 2.15628  |
|             |             |         |          | 1.49605E-19 | 6421.63     | 25278.2 | 3.93641  |
|             |             |         |          | 6.86089E-08 | 7733.63     | 16180.1 | 2.09218  |
| 3.29533E-07 | 4575.78     | 9205.35 | 2.01176  | 8.62176E-09 | 2958.83     | 6867.68 | 2.32108  |
| 6.87109E-05 | 2102.55     | 4594.48 | 2.18519  |             |             |         |          |
|             |             |         |          | 0.00484661  | 1419.53     | 704.3   | -2.01552 |
|             |             |         |          | 0.00230459  | #DIV/0!     | 2241.03 | #DIV/0!  |
| 0.0159146   | 904.333     | 392.6   | -2.30345 |             |             |         |          |
|             |             |         |          | 8.61902E-12 | 10081.2     | 24484.7 | 2.42874  |
| 3.69004E-10 | 8132.28     | 1070.45 | -7.59706 | 2.06173E-12 | 7666.63     | 738.6   | -10.3799 |
| 2.32285E-06 | 4138.95     | 609.325 | -6.79268 | 6.90168E-09 | 4934.38     | 488.375 | -10.1037 |
| 8.70444E-06 | 8020.08     | 2223.75 | -3.60655 | 7.81163E-11 | 5464.45     | 601.375 | -9.08659 |
| #DIV/0!     | 2.3148E-07  | 1041.5  | #DIV/0!  | #DIV/0!     |             |         |          |
|             |             |         |          | 6.92316E-07 | 1957.3      | 219.05  | -8.9354  |
|             |             |         |          | 0.00233662  | 2012.6      | 238.4   | -8.44211 |
|             |             |         |          | 0.00290908  | 929.95      | 120.3   | -7.73026 |
| 3.08938E-05 | 2628.3      | 510.933 | -5.14412 | 4.33575E-06 | 1726.33     | 249.633 | -6.91544 |
| 1.88442E-05 | 1599.63     | 530     | -3.01816 | 4.09876E-10 | 5392.98     | 839.567 | -6.42352 |
|             |             |         |          | 1.28816E-08 | 6057.18     | 958.55  | -6.3191  |
| -2.4156     | 4.38234E-10 | 2126.58 | 165.45   | -12.8533    | 1.9396E-10  | 3431.23 | 543.1    |
|             |             |         |          |             | 4.34483E-06 | 7086.85 | 1159.78  |
|             |             |         |          |             | 0.00409931  | 3646.18 | 601.65   |
|             |             |         |          |             | 8.41057E-05 | 3816.8  | 634.45   |
|             |             |         |          |             | 3.47742E-08 | 6151.38 | 1041.98  |
|             |             |         |          |             | 0.00544888  | 3026.77 | 520.05   |
|             |             |         |          |             | 0.0089617   | 1582.13 | 278.25   |
| 7.44945E-07 | 1629.23     | 304.1   | -5.35753 | 8.72679E-08 | 5021.2      | 885.55  | -5.67015 |
|             |             |         |          | 6.59942E-05 | 8978.45     | 1607.78 | -5.58439 |
| 0.0142123   | 614.825     | 231.133 | -2.66004 | 0.000677407 | 1750.75     | 314.2   | -5.57209 |
|             |             |         |          | 1.49048E-06 | 3711.25     | 667.375 | -5.56097 |
| 0.000166338 | 2625.7      | 536.625 | -4.89299 | 4.20694E-05 | 5700.33     | 1030.68 | -5.53067 |
|             |             |         |          | 0.00144447  | 3907.2      | 706.675 | -5.52899 |
|             |             |         |          | 0.00913745  | 1186.23     | 214.7   | -5.52503 |
| 0.000234184 | 615.4       | 231.25  | -2.66119 | 8.01398E-08 | 2109.23     | 383.467 | -5.50043 |
|             |             |         |          | 7.22364E-05 | 1689.57     | 307.9   | -5.48739 |
|             |             |         |          | 8.73973E-06 | 2277.48     | 416.4   | -5.46944 |
|             |             |         |          | 7.17016E-07 | 2114.25     | 387.033 | -5.46271 |
|             |             |         |          | 3.12035E-05 | 6994.7      | 1284.63 | -5.44494 |
|             |             |         |          | 2.94912E-06 | 2947.85     | 543.75  | -5.42133 |
|             |             |         |          | 0.0213831   | 823.533     | 152.1   | -5.41442 |
|             |             |         |          | 0.000119496 | 908.4       | 167.9   | -5.41036 |
|             |             |         |          | 0.000183779 | 25337.4     | 4685.3  | -5.40786 |
|             |             |         |          | 0.0111651   | 1968.05     | 364.775 | -5.39524 |
| 0.013719    | 534.867     | #DIV/0! | #DIV/0!  | 0.000767175 | 1089.55     | 202.4   | -5.38315 |
|             |             |         |          | 0.00398835  | 2264.23     | 421.1   | -5.37695 |
|             |             |         |          | 9.74373E-07 | 2410.13     | 448.6   | -5.37257 |
|             |             |         |          | 0.000151295 | 9220.4      | 1716.68 | -5.37108 |
| 0.0135238   | 599.05      | 232.9   | -2.57213 | 0.00199858  | 1797.68     | 335.275 | -5.36179 |
| 0.00108356  | 1009.53     | 499     | -2.02311 | 0.000106998 | 1943.33     | 363.3   | -5.34911 |
| 0.00039088  | 6003.65     | 2519.18 | -2.38318 | 6.62673E-10 | 20051.7     | 3756.68 | -5.33762 |
| 0.00696722  | 752.267     | 183.8   | -4.09285 | 0.00209229  | 1953.13     | 369.4   | -5.28729 |
|             |             |         |          | 4.60233E-05 | 3361.73     | 636.4   | -5.28241 |
| 0.000877507 | 837.233     | 254.05  | -3.29555 | 0.0059772   | 1652.43     | 313.3   | -5.27426 |
|             |             |         |          | 0.000271941 | 24425.8     | 4655.5  | -5.24665 |
|             |             |         |          | 5.13969E-07 | 2979.88     | 568.475 | -5.24188 |
|             |             |         |          | 1.18467E-08 | 2330.2      | 444.633 | -5.24072 |
| 1.55234E-07 | 1084.4      | 257.825 | -4.20595 | 4.8801E-09  | 2521.13     | 482.675 | -5.22324 |
|             |             |         |          | 0.00127547  | 1005.93     | 192.6   | -5.22291 |



|         |             |         |         |          |             |         |         |          |
|---------|-------------|---------|---------|----------|-------------|---------|---------|----------|
|         |             |         |         |          | 0.000920641 | 978.7   | 188.4   | -5.1948  |
|         |             |         |         |          | 3.22964E-05 | 1726.57 | 333.933 | -5.17039 |
|         |             |         |         |          | 0.0104405   | 2676.63 | 519.833 | -5.14901 |
|         |             |         |         |          | 0.00218173  | 1919.63 | 374.033 | -5.13223 |
|         |             |         |         |          | 7.28362E-09 | 2169.05 | 425.2   | -5.10125 |
| -6.2336 | 4.52283E-10 | 9059.8  | 1242.88 | -7.28939 | 4.55264E-09 | 4525.7  | 891.075 | -5.07892 |
|         |             |         |         |          | 0.000510022 | 4474.8  | 887.133 | -5.04411 |
|         |             |         |         |          | 0.00120511  | 1450.53 | 288.65  | -5.0252  |
|         | 0.00266913  | 700.25  | 288.7   | -2.42553 | 0.000822091 | 2167.85 | 434.033 | -4.99466 |
|         | 0.000531443 | 1396.58 | 404.333 | -3.45402 | 0.00093236  | 3925.3  | 788.65  | -4.97724 |
|         |             |         |         |          | 0.00104207  | 6630.95 | 1333.13 | -4.97399 |
|         | 0.00131977  | 887.425 | 340.475 | -2.60643 | 1.14799E-05 | 3364.45 | 678.475 | -4.95884 |
|         | 6.38975E-05 | 8682.98 | 2179.48 | -3.98398 | 3.18332E-06 | 23261.7 | 4699.5  | -4.94982 |
|         |             |         |         |          | 0.00274509  | 2103.2  | 425.525 | -4.9426  |
| -2.3225 | 8.2399E-09  | 2228.5  | 603.325 | -3.6937  | 1.59273E-11 | 4999.83 | 1012.88 | -4.93627 |
|         |             |         |         |          | 0.000834764 | 3694.23 | 749.1   | -4.93155 |
|         |             |         |         |          | 0.000012996 | 4053.38 | 822.75  | -4.92662 |
|         | 0.00146106  | 1007.58 | 225.1   | -4.47612 | 0.0013293   | 2295.78 | 467.9   | -4.90655 |
|         |             |         |         |          | 0.0034047   | 2980.88 | 608.3   | -4.90034 |
|         |             |         |         |          | 4.20084E-05 | 1973.23 | 403.367 | -4.89189 |
|         |             |         |         |          | 0.0163765   | 1530.47 | 313.1   | -4.88811 |
|         |             |         |         |          | 3.54565E-05 | 2405.38 | 492.9   | -4.88005 |
| -2.1213 | 5.34079E-08 | 2183.05 | 639.875 | -3.41168 | 3.16278E-10 | 3795.98 | 779.55  | -4.86944 |
|         |             |         |         |          | 0.000525156 | 2163.3  | 444.5   | -4.86682 |
|         | 0.00330451  | 940.525 | 399.85  | -2.35219 | 0.000013201 | 2446.65 | 503.525 | -4.85904 |
|         |             |         |         |          | 0.0157286   | 1126.38 | 231.9   | -4.85716 |
|         |             |         |         |          | 0.000845119 | 11525.1 | 2380.2  | -4.84205 |
|         |             |         |         |          | 0.00106652  | 3927.8  | 811.55  | -4.83987 |
|         |             |         |         |          | 0.000319511 | 2243.85 | 464.3   | -4.83276 |
|         | 4.94331E-05 | 1246.18 | 415.325 | -3.00048 | 5.37978E-08 | 2872.23 | 599     | -4.79503 |
|         |             |         |         |          | 0.00270308  | 2930.63 | 612.5   | -4.78469 |
|         | 9.31598E-05 | 600.15  | 186.25  | -3.22228 | 1.78311E-07 | 1163.8  | 244.1   | -4.76772 |
|         |             |         |         |          | 0.00244307  | 1372.33 | 288.65  | -4.75429 |
|         | 7.10774E-05 | 1104.2  | 355.9   | -3.10256 | 1.00999E-05 | 2309    | 485.75  | -4.75347 |
|         |             |         |         |          | 2.46049E-08 | 2637.07 | 555.15  | -4.75019 |
|         | 0.000105481 | 2119.15 | 668.6   | -3.16953 | 7.41209E-07 | 5464.5  | 1151.33 | -4.74627 |
|         |             |         |         |          | 6.04815E-05 | 6037.48 | 1272.38 | -4.74504 |
|         |             |         |         |          | 0.00241928  | 1860.83 | 392.4   | -4.74218 |
|         |             |         |         |          | 0.000814495 | 905.9   | 191.2   | -4.73797 |
|         | 1.59654E-05 | 4942.03 | 1478.58 | -3.34242 | 1.36269E-07 | 14885.8 | 3141.98 | -4.7377  |
|         |             |         |         |          | 6.6075E-06  | 6527.53 | 1378.03 | -4.73687 |
|         | 2.23351E-05 | 1007.7  | 312.633 | -3.22326 | 0.000413281 | 2864.23 | 605.225 | -4.7325  |
|         |             |         |         |          | 0.00508633  | 2928.83 | 619.85  | -4.72505 |
|         |             |         |         |          | 8.13636E-05 | 1366.7  | 289.8   | -4.71601 |
|         |             |         |         |          | 0.000221918 | 1180.05 | 250.75  | -4.70608 |
|         |             |         |         |          | 0.0187766   | 3151.45 | 670.175 | -4.70243 |
|         | 0.000264679 | 967.4   | 252.1   | -3.83737 | 2.85572E-05 | 3093.68 | 658.775 | -4.6961  |
|         |             |         |         |          | 2.73196E-08 | 4159.1  | 885.675 | -4.69597 |
|         |             |         |         |          | 0.00221515  | 4105.65 | 876.95  | -4.68174 |
|         |             |         |         |          | 0.00193701  | 2811.68 | 602.033 | -4.6703  |
|         |             |         |         |          | 1.76531E-06 | 3544.78 | 761.1   | -4.65744 |
|         |             |         |         |          | 0.00488858  | 1806.1  | 388     | -4.6549  |
|         |             |         |         |          | 0.000746302 | 3857.43 | 834.433 | -4.62281 |
|         |             |         |         |          | 0.000628999 | 1360.53 | 294.7   | -4.61667 |
|         |             |         |         |          | 0.000252424 | 2433.1  | 527.325 | -4.61404 |
|         |             |         |         |          | 0.00600435  | 940.5   | 204.2   | -4.60578 |
|         | 4.30757E-05 | 2847.18 | 831.325 | -3.42486 | 1.04698E-06 | 6376.03 | 1385.95 | -4.60047 |
|         | 2.66703E-05 | 1092.78 | 296.4   | -3.68683 | 0.000177569 | 1968.6  | 429.6   | -4.5824  |
|         |             |         |         |          | 0.00116388  | 1933.35 | 422.233 | -4.57887 |
|         |             |         |         |          | 0.00250439  | 2309.58 | 506.367 | -4.56107 |
|         | 1.10206E-07 | 1584.3  | 413.567 | -3.83082 | 8.90284E-08 | 2650.05 | 582.65  | -4.54827 |
|         |             |         |         |          | 8.31209E-06 | 3230.8  | 712.475 | -4.53462 |
|         | 0.0051347   | 854     | 293.85  | -2.90624 | 0.000722103 | 2010.55 | 443.567 | -4.53269 |

|         |             |         |         |          |             |         |         |          |
|---------|-------------|---------|---------|----------|-------------|---------|---------|----------|
|         |             |         |         |          | 0.00691679  | 1238.65 | 273.65  | -4.5264  |
| -2.3209 | 5.12197E-07 | 2364.83 | 569.325 | -4.15373 | 5.16876E-08 | 3547.15 | 785.5   | -4.51579 |
|         |             |         |         |          | 0.00773817  | 1228    | 272.4   | -4.50808 |
|         | 0.0160222   | 521.2   | 146.6   | -3.55525 | 0.000916205 | 1129.83 | 251.25  | -4.49682 |
|         |             |         |         |          | 0.000832767 | 4358.45 | 969.9   | -4.49371 |
|         |             |         |         |          | 0.000311502 | 3085.85 | 687.367 | -4.48938 |
|         |             |         |         |          | 0.00282156  | 6451.58 | 1440.23 | -4.47953 |
|         |             |         |         |          | 0.0136909   | 1067.45 | 238.45  | -4.47662 |
|         |             |         |         |          | 1.38424E-05 | 1721.17 | 384.5   | -4.47638 |
|         |             |         |         |          | 0.00322638  | 2259.98 | 506.6   | -4.46106 |
|         |             |         |         |          | 0.00352662  | 1278.18 | 287.6   | -4.44428 |
|         |             |         |         |          | 2.10478E-05 | 1144.5  | 257.8   | -4.43949 |
|         |             |         |         |          | 0.00255712  | 1805.98 | 407.5   | -4.43184 |
|         |             |         |         |          | 3.48282E-08 | 1117.9  | 252.333 | -4.43025 |
|         |             |         |         |          | 0.00291179  | 951.667 | 215.2   | -4.42224 |
|         |             |         |         |          | 0.00862815  | 1321.4  | 299.1   | -4.41792 |
|         |             |         |         |          | 6.7918E-06  | 2165.03 | 490.075 | -4.41774 |
| -2.2591 | 9.87826E-08 | 1407.08 | 250.55  | -5.61594 | 2.35156E-06 | 2937.05 | 666.225 | -4.4085  |
|         | 0.00566771  | 890.6   | 268.8   | -3.31324 | 0.0040226   | 3059.7  | 694.6   | -4.40498 |
|         |             |         |         |          | 0.000278867 | 2833.43 | 644.1   | -4.39905 |
|         |             |         |         |          | 5.59002E-06 | 8765.35 | 2000.85 | -4.38081 |
|         | 9.69423E-05 | 711.45  | 266.8   | -2.6666  | 0.000117606 | 1454.9  | 332.2   | -4.37959 |
|         |             |         |         |          | 0.00037626  | 2523.65 | 577.925 | -4.36674 |
|         |             |         |         |          | 0.00471217  | 1306    | 299.2   | -4.36497 |
|         |             |         |         |          | 0.00905289  | 1204.37 | 277.6   | -4.3385  |
|         |             |         |         |          | 0.0019589   | 1120.3  | 258.35  | -4.33637 |
|         | 0.000163595 | 1741.55 | 657     | -2.65076 | 7.37351E-07 | 4337.73 | 1005    | -4.31614 |
|         | 0.000511011 | 721.125 | 259.167 | -2.78248 | 2.32821E-05 | 2095.95 | 485.633 | -4.31591 |
|         |             |         |         |          | 0.0168496   | 2822.53 | 654.2   | -4.31447 |
|         | 1.13979E-05 | 718.85  | 292.175 | -2.46034 | 3.66086E-09 | 1437.03 | 333.225 | -4.31248 |
|         |             |         |         |          | 0.000100594 | 2280.63 | 529.067 | -4.31066 |
|         |             |         |         |          | 0.00267101  | 3880.35 | 900.667 | -4.30831 |
|         | 6.03846E-06 | 6213.13 | 1823.28 | -3.40767 | 4.11664E-08 | 5042.1  | 1171.55 | -4.30379 |
|         |             |         |         |          | 0.000718676 | 7930.7  | 1846.9  | -4.29406 |
|         | 0.00409558  | 1103.53 | 311.575 | -3.54176 | 0.000900394 | 3283.9  | 765.125 | -4.29198 |
|         |             |         |         |          | 2.70732E-07 | 2728.35 | 636.125 | -4.28902 |
|         |             |         |         |          | 2.14067E-06 | 1708.73 | 398.7   | -4.28574 |
|         |             |         |         |          | 0.000395983 | 4377.5  | 1022.1  | -4.28285 |
|         | 0.000903637 | 915.225 | 378.3   | -2.41931 | 5.55153E-06 | 2391.75 | 561.75  | -4.25768 |
|         |             |         |         |          | 0.00291697  | 1129.27 | 265.7   | -4.25016 |
|         |             |         |         |          | 0.00169873  | 626.367 | 147.65  | -4.24224 |
|         |             |         |         |          | 4.12343E-05 | 1852.93 | 437.55  | -4.23477 |
|         | 7.99669E-09 | 1682.73 | 415.35  | -4.05134 | 5.22413E-10 | 2694.6  | 636.475 | -4.23363 |
|         | 1.98676E-07 | 1188.13 | 373.867 | -3.17794 | 1.38709E-08 | 1774.38 | 420.7   | -4.21767 |
|         | 9.96232E-06 | 911.025 | 188.8   | -4.82534 | 2.15089E-06 | 1814.35 | 431.15  | -4.20816 |
|         |             |         |         |          | 9.82404E-07 | 2085.38 | 497.325 | -4.19318 |
|         |             |         |         |          | 2.27389E-05 | 2064.5  | 492.675 | -4.19039 |
|         |             |         |         |          | 0.00115958  | 2037.2  | 486.75  | -4.18531 |
|         |             |         |         |          | 0.000860248 | 5031.05 | 1202.5  | -4.18383 |
|         |             |         |         |          | 2.00038E-05 | 2087.35 | 499.125 | -4.18202 |
|         |             |         |         |          | 8.56291E-07 | 971.1   | 232.4   | -4.17857 |
|         |             |         |         |          | 0.00169904  | 1548.65 | 370.8   | -4.17651 |
|         |             |         |         |          | 6.55401E-05 | 2357.3  | 564.6   | -4.17517 |
|         |             |         |         |          | 7.45306E-10 | 1669.58 | 399.975 | -4.1742  |
|         | 5.23676E-05 | 1112.28 | 333.35  | -3.33666 | 1.1526E-06  | 2873.93 | 689.333 | -4.16914 |
|         | 0.0010132   | 647.167 | #DIV/0! | #DIV/0!  | 0.0171063   | 2318.05 | 556.55  | -4.16503 |
|         | 0.000122049 | 2153.35 | 667.65  | -3.22527 | 1.11919E-07 | 5437.3  | 1309.05 | -4.15362 |
|         |             |         |         |          | 0.0205866   | 3194.18 | 770.3   | -4.14666 |
|         |             |         |         |          | 0.00149335  | 1312.43 | 316.75  | -4.14341 |
| -2.1709 | 3.07255E-08 | 2715.18 | 708.675 | -3.83134 | 1.2729E-08  | 5163.33 | 1250.13 | -4.13025 |
|         | 7.83401E-06 | 878.325 | #DIV/0! | #DIV/0!  | 2.76031E-06 | 2211.83 | 536.2   | -4.125   |
|         | 0.00477528  | 830.133 | #DIV/0! | #DIV/0!  | 0.00550124  | 2004.43 | 486.15  | -4.12308 |
|         |             |         |         |          | 0.00133032  | 2305.25 | 559.3   | -4.12167 |

|         |             |         |         |          |             |         |         |          |
|---------|-------------|---------|---------|----------|-------------|---------|---------|----------|
|         |             |         |         |          | 3.51389E-05 | 2614.45 | 634.35  | -4.12146 |
|         | 9.3015E-07  | 1102    | 358.05  | -3.07778 | 1.18207E-08 | 1619.9  | 393.1   | -4.12083 |
|         | 1.27446E-05 | 821.875 | 206.5   | -3.98002 | 2.74417E-06 | 1763.3  | 427.9   | -4.12082 |
| -2.8477 | 2.95866E-08 | 2293.35 | 538.267 | -4.26062 | 1.27245E-08 | 4157.13 | 1011.08 | -4.11159 |
|         |             |         |         |          | 6.93354E-06 | 1470    | 358     | -4.10615 |
|         | 6.48312E-08 | 1852.58 | 624.25  | -2.96768 | 3.774E-10   | 4845.28 | 1180.33 | -4.10503 |
|         | 0.00272168  | 1502.67 | 703.35  | -2.13644 | 7.76189E-07 | 4367.05 | 1063.9  | -4.10476 |
|         | 0.00271143  | 939.9   | 328.9   | -2.85771 | 0.00025334  | 2322.85 | 566.725 | -4.09873 |
|         |             |         |         |          | 0.000147127 | 1111.9  | 271.633 | -4.09339 |
|         |             |         |         |          | 0.0156025   | 2263.58 | 553.867 | -4.08686 |
|         | 0.0107289   | 771.225 | #DIV/0! | #DIV/0!  | 0.0110075   | 2372.6  | 581.367 | -4.08107 |
|         |             |         |         |          | 0.00407682  | 689.675 | 169.1   | -4.0785  |
|         |             |         |         |          | 0.00139457  | 12364.8 | 3034.7  | -4.07447 |
|         | 0.00476444  | 805.025 | 393.9   | -2.04373 | 0.00270999  | 1889.65 | 464.567 | -4.06755 |
|         | 0.0154896   | 748.025 | #DIV/0! | #DIV/0!  | 0.00478439  | 1830.9  | 450.5   | -4.06415 |
|         | 0.00196659  | 831.45  | 278.067 | -2.99011 | 3.37849E-05 | 2383.23 | 586.433 | -4.06393 |
|         |             |         |         |          | 0.000193356 | 1408.1  | 346.9   | -4.05909 |
|         |             |         |         |          | 0.002222    | 2169.78 | 535.967 | -4.04834 |
|         |             |         |         |          | 0.00150039  | 2129.83 | 526.2   | -4.04757 |
|         | 0.011328    | 1246.08 | 429.4   | -2.9019  | 0.00270831  | 3718.68 | 919.425 | -4.04457 |
|         |             |         |         |          | 0.00129272  | 774.533 | 191.8   | -4.03823 |
|         |             |         |         |          | 0.00463805  | 1707.48 | 423     | -4.03658 |
|         |             |         |         |          | 4.76676E-05 | 1536.63 | 380.75  | -4.03578 |
|         |             |         |         |          | 0.000918897 | 1303.53 | 323.1   | -4.03446 |
| -3.0892 | 2.529E-10   | 2540.98 | 611.167 | -4.15758 | 4.30255E-11 | 2309.08 | 572.9   | -4.0305  |
|         | 7.42152E-06 | 595.633 | 211     | -2.82291 | 8.89928E-11 | 1185.07 | 294.1   | -4.02947 |
|         | 0.000171302 | 2303.88 | 538.2   | -4.2807  | 7.55111E-05 | 5876.35 | 1458.4  | -4.02931 |
|         |             |         |         |          | 0.00161124  | 3459.65 | 859     | -4.02753 |
|         |             |         |         |          | 0.000497478 | 1683.45 | 418.1   | -4.02643 |
|         |             |         |         |          | 0.00155557  | 1096.68 | 272.7   | -4.02154 |
|         |             |         |         |          | 7.54008E-05 | 1659.5  | 412.9   | -4.01913 |
|         | 0.00341734  | 2243.78 | 886.767 | -2.53029 | 0.000171445 | 4839.43 | 1207.88 | -4.00656 |
|         | 0.000212883 | 885.7   | 382.95  | -2.31283 | 3.15338E-06 | 2036.2  | 508.4   | -4.00511 |
|         | 0.000361493 | 1051.27 | 333.2   | -3.15506 | 0.000262907 | 2683.93 | 670.133 | -4.00506 |
|         | 0.0139661   | 790.125 | 202.9   | -3.89416 | 0.00408713  | 2624.6  | 655.55  | -4.00366 |
|         |             |         |         |          | 0.0128917   | 1879.03 | 469.875 | -3.99899 |
|         | 0.000765417 | 1225.18 | 482.675 | -2.5383  | 2.76045E-06 | 3838.7  | 960.5   | -3.99656 |
|         | 2.69144E-05 | 822.275 | 270.067 | -3.04471 | 1.17335E-07 | 2018.7  | 505.667 | -3.99216 |
|         |             |         |         |          | 7.67454E-06 | 1970.48 | 493.6   | -3.99205 |
|         | 4.57317E-05 | 4743.73 | 1686.83 | -2.81222 | 4.17101E-06 | 13028   | 3265.53 | -3.98957 |
|         |             |         |         |          | 0.0010596   | 5943.23 | 1489.85 | -3.98914 |
|         | 0.00147825  | 831.6   | 230.65  | -3.60546 | 6.64929E-05 | 1924.63 | 483.133 | -3.98363 |
|         |             |         |         |          | 0.00479224  | 2057.55 | 516.625 | -3.98268 |
|         |             |         |         |          | 1.56741E-05 | 2538.25 | 637.8   | -3.9797  |
|         |             |         |         |          | 1.7346E-06  | 2174.38 | 547.6   | -3.97074 |
|         |             |         |         |          | 0.000146344 | 1287.25 | 324.575 | -3.96596 |
|         | 0.000165838 | 1606.9  | 527.525 | -3.04611 | 2.7661E-07  | 4411.38 | 1112.47 | -3.9654  |
|         | 0.000260492 | 2446.68 | 811.7   | -3.01426 | 4.25657E-05 | 5525.43 | 1393.63 | -3.96479 |
|         | 0.00351814  | 998.975 | 393.1   | -2.54127 | 0.00021875  | 2768.85 | 698.375 | -3.9647  |
|         |             |         |         |          | 6.46043E-05 | 1621.23 | 410     | -3.95421 |
|         |             |         |         |          | 0.00892633  | 1402.93 | 354.8   | -3.95415 |
|         |             |         |         |          | 0.000163613 | 1751.87 | 443.1   | -3.95366 |
|         |             |         |         |          | 5.19628E-06 | 2679.38 | 679.133 | -3.94529 |
|         |             |         |         |          | 0.0135398   | 1012.83 | 256.8   | -3.94406 |
|         |             |         |         |          | 3.58718E-05 | 1632.35 | 414.267 | -3.94034 |
|         |             |         |         |          | 0.000265708 | 4549.83 | 1155.78 | -3.9366  |
|         |             |         |         |          | 2.53169E-06 | 3219.3  | 818.6   | -3.93269 |
|         |             |         |         |          | 0.000103058 | 1458.43 | 370.9   | -3.93212 |
|         | 0.000322062 | 1093.05 | 390.933 | -2.796   | 2.23127E-07 | 2859.88 | 727.75  | -3.92975 |
|         |             |         |         |          | 0.000629439 | 2100.83 | 535     | -3.92678 |
|         |             |         |         |          | 0.00157661  | 1551.93 | 395.65  | -3.92247 |
|         | 2.47762E-05 | 1093.25 | 306.333 | -3.56882 | 5.49322E-05 | 2554.58 | 652.2   | -3.91686 |
|         |             |         |         |          | 0.0167471   | 917.533 | 234.3   | -3.91606 |

|         |             |         |         |          |             |         |         |          |
|---------|-------------|---------|---------|----------|-------------|---------|---------|----------|
|         | 6.96576E-05 | 1251.95 | 409.533 | -3.05702 | 7.85504E-06 | 3043.03 | 777.625 | -3.91323 |
|         | 0.000886415 | 1022.4  | #DIV/0! | #DIV/0!  | 0.00254715  | 2181.18 | 557.4   | -3.91312 |
|         |             |         |         |          | 0.000174292 | 792.575 | 202.6   | -3.91202 |
|         |             |         |         |          | 1.64893E-05 | 5579.83 | 1427.43 | -3.90901 |
| -2.4035 | 3.11443E-08 | 2053.05 | 506.333 | -4.05474 | 5.91957E-08 | 2258.15 | 578.175 | -3.90565 |
|         |             |         |         |          | 0.00173874  | 1065.7  | 272.9   | -3.90509 |
|         | 0.00780795  | 710.233 | #DIV/0! | #DIV/0!  | 0.00192708  | 2551.7  | 654.2   | -3.90049 |
|         | 0.00210508  | 591.533 | 263.3   | -2.24661 | 0.000836021 | 1278.28 | 327.9   | -3.89837 |
|         | 0.00306706  | 779.5   | 303.2   | -2.57091 | 1.4945E-06  | 1908.83 | 489.95  | -3.89598 |
|         |             |         |         |          | 0.000248389 | 2001.58 | 514.233 | -3.89235 |
|         |             |         |         |          | 0.00252246  | 850.333 | 218.5   | -3.89169 |
|         | 0.0129321   | 661.267 | #DIV/0! | #DIV/0!  | 0.000532982 | 1568.68 | 403.533 | -3.88735 |
|         | 0.00634189  | 655.575 | #DIV/0! | #DIV/0!  | 0.00885315  | 1520.53 | 391.233 | -3.88649 |
|         |             |         |         |          | 0.000131983 | 3471.53 | 893.825 | -3.8839  |
|         |             |         |         |          | 0.00844987  | 2036.13 | 525.2   | -3.87686 |
|         |             |         |         |          | 4.85227E-05 | 1008.67 | 260.2   | -3.87651 |
|         | 0.00242138  | 1608.57 | #DIV/0! | #DIV/0!  | 0.00013771  | 2805.65 | 723.867 | -3.87592 |
|         |             |         |         |          | 0.00582409  | 1501.78 | 387.467 | -3.87588 |
|         |             |         |         |          | 0.00878133  | 1009.58 | 260.5   | -3.87553 |
|         | 0.000686245 | 965.4   | 323     | -2.98885 | 0.00031361  | 2653.3  | 684.775 | -3.8747  |
|         | 4.89928E-05 | 623.5   | 213.7   | -2.91764 | 2.81139E-05 | 1059    | 273.425 | -3.87309 |
|         |             |         |         |          | 0.00587099  | 2008.08 | 519.75  | -3.86354 |
|         | 0.00871097  | 676.75  | 282.667 | -2.39416 | 0.00136629  | 1770.77 | 459.625 | -3.85263 |
|         |             |         |         |          | 1.10588E-05 | 3263.85 | 847.25  | -3.85229 |
|         | 3.89224E-05 | 2534.68 | 738.525 | -3.43208 | 1.28615E-05 | 4877.4  | 1267.78 | -3.84721 |
|         |             |         |         |          | 0.000176749 | 978.525 | 254.425 | -3.84603 |
|         | 0.000076263 | 866.45  | 376.1   | -2.30378 | 1.06259E-08 | 2112.4  | 549.6   | -3.84352 |
|         | 0.000103185 | 736.125 | 190.55  | -3.86316 | 2.54549E-05 | 2126.55 | 553.45  | -3.84235 |
|         |             |         |         |          | 0.000419022 | 1107.6  | 288.3   | -3.84183 |
|         |             |         |         |          | 0.00987352  | 1953.83 | 508.7   | -3.84084 |
|         |             |         |         |          | 3.90982E-06 | 2284.13 | 595     | -3.83888 |
|         |             |         |         |          | 1.56133E-08 | 2066.78 | 538.45  | -3.83838 |
|         | 0.000661469 | 2757.35 | 789.175 | -3.49397 | 8.84454E-06 | 6880.88 | 1793.78 | -3.83597 |
|         |             |         |         |          | 0.00255682  | 936.3   | 244.3   | -3.83258 |
|         |             |         |         |          | 2.91333E-06 | 2690.13 | 702.125 | -3.8314  |
|         |             |         |         |          | 0.0090751   | 2783.98 | 727.825 | -3.82506 |
|         |             |         |         |          | 0.00981104  | 2039.9  | 533.325 | -3.82487 |
|         | 1.50616E-05 | 1198.93 | 426.275 | -2.81256 | 2.19095E-06 | 1958.15 | 512.05  | -3.82414 |
|         |             |         |         |          | 7.99072E-06 | 1093.97 | 286.4   | -3.81972 |
| -2.3645 |             |         |         |          | 1.85578E-06 | 3112.65 | 815.075 | -3.81885 |
| -2.5346 | 1.42668E-06 | 1087.8  | 320.4   | -3.39513 | 3.66874E-06 | 1598.15 | 419.233 | -3.81208 |
|         |             |         |         |          | 0.000300302 | 1523.57 | 399.7   | -3.81178 |
|         |             |         |         |          | 0.0108995   | 1340.23 | 351.9   | -3.80856 |
|         |             |         |         |          | 0.00820292  | 4334.8  | 1139.05 | -3.80563 |
|         | 0.00301561  | 5012.8  | 1674.95 | -2.99281 | 0.000256661 | 13024.3 | 3423.13 | -3.80478 |
|         |             |         |         |          | 2.74833E-05 | 1049.53 | 276     | -3.80263 |
|         |             |         |         |          | 0.000862073 | 1603.85 | 421.9   | -3.80149 |
|         | 2.43107E-11 | 2019.08 | 452.8   | -4.45909 | 2.50117E-11 | 4628.45 | 1218.03 | -3.79994 |
|         |             |         |         |          | 0.0217165   | 1488.03 | 391.6   | -3.79986 |
|         |             |         |         |          | 0.000396884 | 1556.7  | 409.733 | -3.7993  |
|         |             |         |         |          | 0.00416704  | 1165.17 | 306.833 | -3.79739 |
|         |             |         |         |          | 0.017556    | 1801.43 | 475.1   | -3.79169 |
|         |             |         |         |          | 0.00156689  | 1095.53 | 289.6   | -3.78289 |
|         |             |         |         |          | 0.00785348  | 1784.6  | 471.8   | -3.78253 |
|         |             |         |         |          | 0.000122767 | 3285.43 | 868.6   | -3.78244 |
|         |             |         |         |          | 0.0129251   | 1071.37 | 283.45  | -3.77974 |
|         |             |         |         |          | 0.0117656   | 1378.73 | 364.8   | -3.77942 |
|         |             |         |         |          | 3.06351E-07 | 2569.78 | 680.025 | -3.77894 |
|         | 3.79499E-06 | 1048.7  | 241.825 | -4.33661 | 3.40358E-06 | 1952.8  | 516.85  | -3.77827 |
|         | 0.000187082 | 2268.05 | 672.65  | -3.37181 | 1.99404E-05 | 6485.43 | 1720.2  | -3.77016 |
|         |             |         |         |          | 1.56472E-05 | 1716.33 | 455.5   | -3.768   |
|         | 2.75789E-07 | 870.525 | 245.25  | -3.54954 | 9.40343E-09 | 1052.73 | 279.4   | -3.76781 |
|         |             |         |         |          | 1.35291E-06 | 1580.25 | 420.033 | -3.7622  |

|         |             |         |         |             |             |         |          |          |
|---------|-------------|---------|---------|-------------|-------------|---------|----------|----------|
|         |             |         |         | 0.00974484  | 1597.95     | 424.867 | -3.76106 |          |
|         |             |         |         | 0.00626874  | 1583.5      | 421.5   | -3.75682 |          |
|         |             |         |         | 0.000964873 | 816.7       | 217.9   | -3.74805 |          |
|         |             |         |         | 0.00411191  | 1206.6      | 322.2   | -3.74488 |          |
|         | 0.0136005   | 948.233 | 252.95  | -3.7487     | 0.00751336  | 1685.9  | 450.533  | -3.74201 |
|         | 0.00184605  | 1621.78 | 714.525 | -2.26972    | 2.02554E-05 | 4213.88 | 1126.83  | -3.7396  |
|         |             |         |         |             | 0.00273281  | 2640.18 | 706.467  | -3.73715 |
|         |             |         |         |             | 0.00122457  | 2080.5  | 557.8    | -3.72983 |
|         | 0.000166946 | 3376.15 | 762.167 | -4.42967    | 0.000202009 | 4366.7  | 1170.83  | -3.72957 |
|         |             |         |         |             | 5.55533E-05 | 2377.8  | 638.475  | -3.72419 |
|         | 1.55826E-06 | 929.625 | 396.425 | -2.34502    | 1.90666E-08 | 1993.83 | 535.45   | -3.72364 |
|         |             |         |         |             | 0.00165825  | 1567.13 | 421.1    | -3.7215  |
|         |             |         |         |             | 0.00154499  | 1621.98 | 436.3    | -3.71757 |
|         |             |         |         |             | 0.0134437   | 1802.25 | 484.875  | -3.71694 |
|         |             |         |         |             | 6.86451E-05 | 1590.13 | 428.525  | -3.71069 |
|         |             |         |         |             | 0.0017846   | 1550.6  | 418.5    | -3.70514 |
| -2.8693 | 3.56292E-06 | 1638.5  | 491.725 | -3.33215    | 2.18134E-10 | 1707    | 460.8    | -3.70443 |
|         |             |         |         |             | 0.00105638  | 847.375 | 228.75   | -3.70437 |
|         |             |         |         |             | 0.000662038 | 3360.98 | 907.35   | -3.70417 |
|         |             |         |         |             | 0.00622944  | 1381.03 | 372.867  | -3.7038  |
|         |             |         |         |             | 0.00906307  | 1563.33 | 422.55   | -3.69974 |
|         |             |         |         |             | 0.000045545 | 2215.75 | 598.967  | -3.69929 |
|         | 0.000808584 | 721.3   | 157.633 | -4.57581    | 0.000266627 | 1250.4  | 338.85   | -3.69013 |
|         |             |         |         |             | 0.00503912  | 1247.98 | 338.233  | -3.68969 |
|         | 0.000383636 | 788.95  | 326.025 | -2.41991    | 4.10794E-06 | 1738.8  | 472.95   | -3.6765  |
|         | 7.95756E-07 | 843.45  | 321.05  | -2.62716    | 2.14742E-09 | 1713.83 | 466.35   | -3.67499 |
|         |             |         |         |             | 5.77641E-05 | 2000    | 544.433  | -3.67354 |
|         |             |         |         |             | 0.00231912  | 1095.3  | 298.3    | -3.67181 |
|         | 0.00691054  | 1057.1  | 447     | -2.36488    | 3.33661E-07 | 2333.45 | 635.9    | -3.66952 |
|         | 0.00141088  | 737.825 | 181.55  | -4.06403    | 8.01202E-05 | 1841.25 | 502.275  | -3.66582 |
|         | 0.000272349 | 1056.93 | 516.6   | -2.04594    | 2.03841E-06 | 1812.7  | 495.2    | -3.66054 |
|         |             |         |         |             | 0.00165493  | 1704.88 | 465.867  | -3.65958 |
|         |             |         |         |             | 2.64871E-07 | 907.575 | 248.233  | -3.65614 |
|         |             |         |         |             | 0.00602752  | 2989.65 | 819.033  | -3.65022 |
|         | 0.000246363 | 740.033 | 328.5   | -2.25277    | 7.77229E-06 | 1738    | 476.15   | -3.65011 |
|         | 1.08344E-07 | 867.175 | 301.733 | -2.87398    | 1.82126E-09 | 2008.13 | 550.225  | -3.64964 |
|         | 0.00114441  | 1070.8  | 460.05  | -2.32757    | 1.08699E-07 | 2381.3  | 652.9    | -3.64727 |
|         |             |         |         |             | 0.0223009   | 787.625 | 216.05   | -3.64557 |
|         | 4.9279E-07  | 1386.48 | 506.8   | -2.73574    | 1.13327E-08 | 2834.4  | 778.05   | -3.64295 |
|         | 0.000352814 | 1133.33 | 458.45  | -2.47208    | 7.48704E-06 | 2295.95 | 631.15   | -3.63772 |
|         | 0.00237438  | 2467.1  | 689.275 | -3.57927    | 0.00314371  | 6271.15 | 1724.65  | -3.63619 |
|         |             |         |         |             | 0.0148297   | 851.133 | 234.1    | -3.63577 |
|         |             |         |         |             | 0.00339298  | 2045.95 | 562.733  | -3.63574 |
|         |             |         |         |             | 4.60299E-07 | 3038.33 | 836.567  | -3.6319  |
|         | 0.00083683  | 730.267 | 229.3   | -3.18477    | 0.00019303  | 1903.83 | 524.25   | -3.63154 |
|         | 0.00763403  | 639.85  | 239.1   | -2.67608    | 9.36782E-05 | 1302.77 | 358.833  | -3.63056 |
|         | 1.34157E-07 | 774.975 | 213.8   | -3.62477    | 6.28008E-06 | 935.9   | 258.3    | -3.62331 |
|         | 0.0109441   | 573     | 222.15  | -2.57934    | 0.000488884 | 1379.85 | 381.075  | -3.62094 |
|         |             |         |         |             | 0.0127906   | 1774.7  | 490.467  | -3.61839 |
|         |             |         |         |             | 0.000414961 | 2239.3  | 619.333  | -3.61566 |
|         |             |         |         |             | 0.00770386  | 1517.7  | 419.95   | -3.614   |
|         |             |         |         |             | 0.00154913  | 3740.23 | 1034.98  | -3.61383 |
|         |             |         |         |             | 7.49644E-06 | 1822.7  | 504.5    | -3.61288 |
|         |             |         |         |             | 0.00127315  | 780.667 | 216.1    | -3.61253 |
|         | 3.67821E-11 | 1522.97 | 427.9   | -3.55916    | 2.2368E-09  | 2448.7  | 678.1    | -3.61112 |
|         |             |         |         |             | 0.00123049  | 2652    | 734.467  | -3.61078 |
|         |             |         |         |             | 0.0146101   | 1715.27 | 475.05   | -3.61071 |
|         | 0.000197195 | 800.575 | 314.1   | -2.54879    | 1.11221E-06 | 1518.9  | 420.7    | -3.61041 |
|         |             |         |         |             | 7.6256E-06  | 1092.83 | 302.867  | -3.60827 |
|         |             |         |         |             | 0.00481838  | 1410.37 | 391      | -3.60708 |
|         |             |         |         |             | 1.99173E-06 | 3800.33 | 1054.25  | -3.60477 |
|         |             |         |         |             | 1.70466E-06 | 1607.48 | 446.075  | -3.6036  |
|         |             |         |         |             | 0.000278252 | 1399.33 | 388.7    | -3.60001 |

|         |             |         |          |             |         |         |          |
|---------|-------------|---------|----------|-------------|---------|---------|----------|
|         |             |         |          | 0.00607401  | 1085.55 | 301.633 | -3.59891 |
|         |             |         |          | 5.74998E-05 | 7991.5  | 2222.38 | -3.59593 |
|         |             |         |          | 1.74487E-06 | 2532.35 | 704.725 | -3.59339 |
|         |             |         |          | 9.58882E-05 | 2417.75 | 672.9   | -3.59303 |
|         |             |         |          | 0.0137326   | 1276.83 | 355.5   | -3.59165 |
|         |             |         |          | 0.0125151   | 1007.53 | 280.9   | -3.5868  |
|         |             |         |          | 0.000935283 | 1833.15 | 512     | -3.58037 |
|         | 0.00795037  | 715.167 | #DIV/0!  | 4.24721E-05 | 1690.58 | 472.3   | -3.57945 |
|         |             |         |          | 0.0125737   | 2466.55 | 689.4   | -3.57782 |
|         | 0.0023293   | 1027.93 | 433.5    | 0.000406152 | 2820.5  | 788.525 | -3.57693 |
|         |             |         | -2.37122 | 1.27427E-05 | 2502.4  | 699.8   | -3.57588 |
| -2.0313 | 5.77504E-09 | 3275.85 | 1295.15  | 1.19277E-12 | 3955.05 | 1106.1  | -3.57567 |
|         |             |         |          | 1.46398E-09 | 1250.33 | 349.875 | -3.57363 |
|         |             |         |          | 0.00191361  | 196198  | 54924.3 | -3.57215 |
|         | 0.00473577  | 574.433 | #DIV/0!  | 0.00653513  | 1508.57 | 422.7   | -3.56888 |
|         |             |         | #DIV/0!  | 2.33449E-06 | 2418.9  | 678.067 | -3.56735 |
|         |             |         |          | 2.62877E-05 | 2015.85 | 565.133 | -3.56703 |
|         |             |         |          | 0.00292056  | 1858.23 | 521.15  | -3.56564 |
|         |             |         |          | 0.0138095   | 833.567 | 233.833 | -3.56479 |
|         | 1.20792E-05 | 1205.48 | 356.175  | 1.09056E-06 | 1940.58 | 544.675 | -3.56281 |
|         |             |         | -3.3845  | 0.00231673  | 1098.8  | 308.667 | -3.55983 |
|         | 0.000824952 | 702.9   | #DIV/0!  | 0.00158584  | 1502.07 | 422.1   | -3.55856 |
|         |             |         | #DIV/0!  | 0.00667628  | 1273.1  | 358.1   | -3.55515 |
|         |             |         |          | 4.17171E-05 | 1383.33 | 389.4   | -3.55245 |
|         | 0.000100141 | 2777.58 | 823.175  | 4.77812E-05 | 6865.83 | 1933.35 | -3.55126 |
|         |             |         | -3.37422 | 3.12185E-05 | 1240.87 | 349.55  | -3.5499  |
|         |             |         |          | 4.28564E-05 | 1703.77 | 480.1   | -3.54877 |
|         |             |         |          | 0.00126052  | 900.025 | 253.8   | -3.5462  |
|         | 0.000212617 | 758.875 | 245.7    | 1.14082E-05 | 1678.88 | 474.4   | -3.53894 |
|         | 4.23107E-05 | 1594.1  | 348.9    | 1.71618E-05 | 2063.33 | 583.233 | -3.53774 |
|         |             |         | -3.08862 | 0.00262203  | 4653.23 | 1316.8  | -3.53374 |
|         |             |         | -4.56893 | 0.00184716  | 632.425 | 179.05  | -3.53211 |
|         |             |         |          | 0.00525593  | 1448.8  | 410.5   | -3.52935 |
|         |             |         |          | 0.000195309 | 923.233 | 261.6   | -3.52918 |
|         | 0.000729016 | 920.967 | #DIV/0!  | 0.00301258  | 2188.87 | 620.8   | -3.52588 |
|         |             |         | #DIV/0!  | 0.000311637 | 1139.2  | 323.1   | -3.52584 |
|         | 0.00582953  | 803.425 | 368.7    | 4.64852E-05 | 2081.63 | 590.775 | -3.52355 |
|         |             |         | -2.17908 | 0.0109842   | 1119.9  | 318.05  | -3.52114 |
|         |             |         |          | 0.000243285 | 1073.65 | 305.333 | -3.51632 |
|         |             |         |          | 0.0032284   | 1219.65 | 347     | -3.51484 |
|         | 0.000742352 | 1505.83 | 420.4    | 0.00203812  | 1502.13 | 427.4   | -3.51456 |
|         | 0.00054878  | 674.4   | 321.667  | 3.55947E-07 | 1547.78 | 440.6   | -3.51288 |
|         |             |         | -2.09658 | 0.0110903   | 1258.25 | 358.95  | -3.50536 |
|         | 0.000140461 | 1327.95 | 505.975  | 1.82225E-06 | 3593.4  | 1025.55 | -3.50388 |
|         |             |         | -2.62454 | 0.0010264   | 4740.3  | 1353.18 | -3.50309 |
|         |             |         |          | 0.00017909  | 1979.25 | 565.033 | -3.50289 |
|         |             |         |          | 1.20193E-06 | 1564.28 | 447     | -3.4995  |
|         |             |         |          | 3.80749E-05 | 1865.5  | 533.275 | -3.4982  |
|         |             |         |          | 0.00527774  | 1286    | 367.65  | -3.49789 |
|         |             |         |          | 4.79696E-06 | 1406.63 | 402.75  | -3.49255 |
|         |             |         |          | 0.0170803   | 1480.68 | 424.05  | -3.49175 |
|         |             |         |          | 0.00263711  | 2016.63 | 577.6   | -3.4914  |
|         |             |         |          | 0.000357536 | 1981.58 | 567.85  | -3.48961 |
|         |             |         |          | 0.000405388 | 2387.7  | 685.175 | -3.4848  |
| -2.6966 | 8.98066E-08 | 1786.6  | 573.925  | 8.88471E-09 | 2127.78 | 610.775 | -3.48373 |
|         |             |         | -3.11295 | 0.000135236 | 1548.78 | 444.8   | -3.48196 |
|         |             |         |          | 0.00305699  | 1569.43 | 450.733 | -3.48194 |
|         |             |         |          | 9.10197E-07 | 2517.83 | 723.333 | -3.48086 |
|         | 2.79798E-05 | 1519.38 | 447.925  | 3.04023E-05 | 2069.3  | 595.1   | -3.47723 |
|         | 0.000180779 | 674.75  | 135.7    | 0.00283978  | 1218.58 | 350.567 | -3.47602 |
|         |             |         | -4.97237 | 0.017387    | 1045.13 | 301.05  | -3.4716  |
|         |             |         |          | 0.00868503  | 990.5   | 285.4   | -3.47057 |
|         |             |         |          | 0.017361    | 1481.85 | 427.9   | -3.46308 |

|             |             |         |          |             |             |         |          |          |
|-------------|-------------|---------|----------|-------------|-------------|---------|----------|----------|
|             |             |         |          | 0.00966894  | 1654.23     | 478.2   | -3.45929 |          |
| 0.000141748 | 2999.6      | 1150.08 | -2.60818 | 3.28294E-06 | 5840.48     | 1689.1  | -3.45774 |          |
|             |             |         |          | 0.00414668  | 1215.78     | 352.75  | -3.44656 |          |
| 0.000829398 | 882.575     | 346.6   | -2.54638 | 0.00011241  | 1928.1      | 559.525 | -3.44596 |          |
|             |             |         |          | 0.0193155   | 2649.35     | 769.1   | -3.44474 |          |
|             |             |         |          | 0.00283428  | 1039.7      | 302.1   | -3.44158 |          |
|             |             |         |          | 0.000032693 | 1324.53     | 385     | -3.44035 |          |
|             |             |         |          | 1.00925E-06 | 7290.53     | 2119.28 | -3.4401  |          |
| 0.000019474 | 1367.9      | 543.65  | -2.51614 | 1.93934E-07 | 3011.58     | 875.9   | -3.43826 |          |
|             |             |         |          | 0.0186198   | 1310.18     | 381.15  | -3.43743 |          |
|             |             |         |          | 0.00551307  | 1205.03     | 350.8   | -3.4351  |          |
|             |             |         |          | 0.00043238  | 3230.58     | 940.675 | -3.43432 |          |
|             |             |         |          | 0.0195014   | 1328.8      | 387.3   | -3.43093 |          |
|             |             |         |          | 0.000664076 | 2089.18     | 609     | -3.4305  |          |
|             |             |         |          | 4.28519E-05 | 618.767     | 180.567 | -3.4268  |          |
|             |             |         |          | 0.00200379  | 2799.58     | 817.8   | -3.4233  |          |
| 0.000299305 | 1157.67     | 337.6   | -3.42911 | 3.74246E-05 | 1427.23     | 416.967 | -3.42288 |          |
|             |             |         |          | 1.83916E-05 | 558.333     | 163.2   | -3.42116 |          |
|             |             |         |          | 2.58243E-07 | 3352.93     | 980.333 | -3.42019 |          |
|             |             |         |          | 0.000553982 | 2697.6      | 790.475 | -3.41263 |          |
| 2.12846E-05 | 1172.08     | 499.425 | -2.34685 | 1.98666E-08 | 2466.48     | 722.925 | -3.4118  |          |
|             |             |         |          | 1.05394E-05 | 1565.6      | 459     | -3.41089 |          |
|             |             |         |          | 0.000236681 | 1325.18     | 388.867 | -3.40779 |          |
| 0.00451642  | 1008.1      | 319.3   | -3.15722 | 0.00783752  | 1773.45     | 520.425 | -3.4077  |          |
|             |             |         |          | 0.0011499   | 934.533     | 274.267 | -3.40739 |          |
| 0.00463834  | 798.367     | #DIV/0! | #DIV/0!  | 0.0149642   | 2504.87     | 735.15  | -3.40729 |          |
|             |             |         |          | 0.0154047   | 1633        | 479.425 | -3.40616 |          |
| 0.00412497  | 1011.3      | 493.7   | -2.04841 | 0.0119576   | 2001.03     | 587.525 | -3.40586 |          |
| -5.7014     | 3.65082E-06 | 2203.45 | 388.075  | -5.6779     | 2.23649E-05 | 1522.85 | 447.3    | -3.40454 |
|             |             |         |          | 2.85745E-07 | 2235.45     | 656.767 | -3.40372 |          |
|             |             |         |          | 0.0156005   | 1576.87     | 463.35  | -3.40319 |          |
|             |             |         |          | 4.64882E-07 | 1410.55     | 414.5   | -3.40302 |          |
|             |             |         |          | 1.47571E-05 | 2689.25     | 790.95  | -3.40003 |          |
| 9.73607E-05 | 3357.15     | 1059.48 | -3.16869 | 3.66897E-05 | 6806.53     | 2004.25 | -3.39605 |          |
|             |             |         |          | 8.90485E-05 | 2647.85     | 779.8   | -3.39555 |          |
| 0.0100806   | 979.025     | 357.7   | -2.737   | 0.00060532  | 2723.13     | 802.233 | -3.39443 |          |
| 9.14279E-07 | 1143.93     | 376.6   | -3.03751 | 6.80571E-07 | 2574.38     | 758.925 | -3.39213 |          |
|             |             |         |          | 0.000795938 | 3577.95     | 1055.85 | -3.38869 |          |
| 0.00190178  | 1691.8      | 529.1   | -3.19751 | 0.000799958 | 3762.88     | 1110.78 | -3.38761 |          |
|             |             |         |          | 0.00145796  | 1551.68     | 458.1   | -3.3872  |          |
| 0.000226511 | 1430.05     | 321.15  | -4.4529  | 0.000143166 | 3169.2      | 935.9   | -3.38626 |          |
|             |             |         |          | 0.00975142  | 1660.2      | 490.4   | -3.3854  |          |
|             |             |         |          | 0.000671964 | 2480.55     | 733.2   | -3.38318 |          |
|             |             |         |          | 2.53967E-06 | 3343.55     | 989.625 | -3.3786  |          |
|             |             |         |          | 0.00075214  | 1643.83     | 486.767 | -3.37703 |          |
|             |             |         |          | 0.00230933  | 1794.2      | 532.567 | -3.36897 |          |
|             |             |         |          | 0.000624927 | 1151.3      | 343.35  | -3.35314 |          |
|             |             |         |          | 5.55538E-06 | 1156.05     | 344.975 | -3.35111 |          |
|             |             |         |          | 0.000156499 | 1736.03     | 518.45  | -3.34849 |          |
| 0.000440199 | 573.025     | 272.5   | -2.10284 | 0.000426774 | 1391.68     | 415.975 | -3.34557 |          |
|             |             |         |          | 0.00162157  | 1597.8      | 478.3   | -3.34058 |          |
|             |             |         |          | 0.000725233 | 1025.77     | 307.1   | -3.34017 |          |
|             |             |         |          | 0.000276174 | 1232.18     | 369.067 | -3.33862 |          |
|             |             |         |          | 0.000483579 | 1672.2      | 500.9   | -3.33839 |          |
| 0.000531705 | 820.85      | 321.833 | -2.55054 | 0.000168968 | 1618.35     | 485.067 | -3.33635 |          |
| 0.015387    | 959.733     | #DIV/0! | #DIV/0!  | 0.0113444   | 2176.83     | 652.7   | -3.33511 |          |
|             |             |         |          | 0.00273874  | 1809.2      | 542.967 | -3.33206 |          |
| 0.00666001  | 601.6       | 163.3   | -3.68402 | 0.0109421   | 1406.03     | 422.6   | -3.3271  |          |
|             |             |         |          | 0.00111743  | 2045.7      | 615.3   | -3.32472 |          |
|             |             |         |          | 0.00116395  | 1843.28     | 554.825 | -3.32226 |          |
| 0.00307961  | 772.233     | 242.967 | -3.17835 | 2.60084E-06 | 1578.93     | 475.4   | -3.32126 |          |
|             |             |         |          | 0.0102647   | 2095        | 630.9   | -3.32065 |          |
|             |             |         |          | 0.00839052  | 2501.55     | 753.367 | -3.32049 |          |

|             |         |         |          |             |         |         |          |
|-------------|---------|---------|----------|-------------|---------|---------|----------|
|             |         |         |          | 0.00290656  | 1370.53 | 413.5   | -3.31445 |
|             |         |         |          | 0.0122605   | 963.033 | 290.7   | -3.31281 |
|             |         |         |          | 5.92202E-05 | 1589.6  | 479.9   | -3.31236 |
| 0.000594719 | 869.975 | #DIV/0! | #DIV/0!  | 1.85189E-05 | 2005.33 | 605.8   | -3.31022 |
|             |         |         |          | 1.64046E-05 | 3089.78 | 933.6   | -3.30953 |
|             |         |         |          | 0.00537853  | 824.2   | 249.05  | -3.30938 |
|             |         |         |          | 0.0133203   | 883     | 266.933 | -3.30794 |
|             |         |         |          | 0.00700768  | 1241.07 | 375.3   | -3.30687 |
|             |         |         |          | 0.00959324  | 992     | 300.1   | -3.30556 |
| 0.00411845  | 853.7   | 375.35  | -2.27441 | 7.16173E-05 | 2253.58 | 681.8   | -3.30533 |
|             |         |         |          | 2.91774E-05 | 1259.85 | 381.8   | -3.29976 |
| 3.62381E-05 | 935.875 | 356.275 | -2.62683 | 1.22009E-05 | 2310.05 | 700.1   | -3.2996  |
|             |         |         |          | 0.0132081   | 1999.4  | 605.967 | -3.29952 |
|             |         |         |          | 0.0123708   | 1412.65 | 428.5   | -3.29673 |
| 1.54177E-07 | 1643.3  | 481.3   | -3.41429 | 5.12055E-08 | 1839.48 | 558     | -3.29655 |
|             |         |         |          | 0.00287447  | 1225.25 | 372.133 | -3.2925  |
| 0.000909069 | 573.65  | 239.5   | -2.3952  | 0.000499872 | 1183.4  | 359.425 | -3.29248 |
| 0.000427468 | 594.525 | 151.3   | -3.92944 | 6.40569E-05 | 1373.1  | 417.167 | -3.29149 |
| 0.0102481   | 609.15  | 200.325 | -3.04081 | 0.0100591   | 1398.28 | 424.925 | -3.29064 |
| 0.000140254 | 1377.98 | 382.475 | -3.60278 | 0.000332624 | 2311.43 | 702.825 | -3.28876 |
|             |         |         |          | 0.000245997 | 1575.68 | 479.125 | -3.28865 |
|             |         |         |          | 0.0027508   | 2381.63 | 724.433 | -3.28757 |
|             |         |         |          | 0.000343503 | 2428.68 | 739.033 | -3.28629 |
|             |         |         |          | 0.0206996   | 674.6   | 205.3   | -3.28592 |
| 0.010732    | 663.8   | 247.85  | -2.67823 | 0.00392732  | 1463.25 | 445.625 | -3.28359 |
|             |         |         |          | 0.000144396 | 1457.5  | 443.9   | -3.2834  |
|             |         |         |          | 2.31813E-05 | 1598.65 | 487.25  | -3.28096 |
|             |         |         |          | 0.000144805 | 741.025 | 226.2   | -3.27597 |
|             |         |         |          | 0.00832965  | 1480.73 | 452.45  | -3.27268 |
| 0.00102823  | 1430.27 | #DIV/0! | #DIV/0!  | 4.99103E-05 | 2884.93 | 881.8   | -3.27163 |
| 0.0029558   | 597.725 | 259.3   | -2.30515 | 0.000053031 | 1316.7  | 402.8   | -3.26887 |
| 7.60756E-09 | 1939.1  | 668.433 | -2.90096 | 1.68793E-10 | 3080.68 | 943.9   | -3.26377 |
| 0.00188799  | 706.675 | 185.5   | -3.80957 | 3.35915E-06 | 1832.1  | 561.85  | -3.26083 |
| 0.00172599  | 756.2   | 215.85  | -3.50336 | 0.000614994 | 1510.5  | 463.233 | -3.26078 |
| 0.00661182  | 577.233 | 160.767 | -3.5905  | 0.000177648 | 1291.1  | 395.967 | -3.26063 |
|             |         |         |          | 0.0108761   | 1605.67 | 492.45  | -3.26057 |
|             |         |         |          | 7.28883E-06 | 1340.58 | 411.2   | -3.26015 |
|             |         |         |          | 0.000835969 | 2853.13 | 875.65  | -3.25829 |
|             |         |         |          | 0.0173691   | 998.767 | 306.933 | -3.25402 |
| 4.70395E-06 | 846.85  | 353.967 | -2.39246 | 4.97127E-05 | 814.15  | 250.2   | -3.254   |
|             |         |         |          | 2.32598E-07 | 1523.78 | 468.55  | -3.25211 |
|             |         |         |          | 3.13875E-05 | 2437.4  | 749.65  | -3.25138 |
|             |         |         |          | 1.15708E-07 | 2195.98 | 675.775 | -3.24957 |
|             |         |         |          | 0.00794213  | 1162.63 | 357.85  | -3.24892 |
| 0.000423112 | 585.3   | 226.15  | -2.58811 | 0.000327718 | 1421.68 | 438.075 | -3.24528 |
|             |         |         |          | 0.00181485  | 992.875 | 306.05  | -3.24416 |
| 0.00025959  | 731.533 | 222.1   | -3.29371 | 0.00241167  | 1998.4  | 616.35  | -3.24231 |
| 1.42593E-06 | 1146.18 | 458.9   | -2.49766 | 4.08507E-06 | 2215.78 | 683.475 | -3.24193 |
|             |         |         |          | 0.00177332  | 1240.9  | 382.9   | -3.24079 |
| 0.000500005 | 660.833 | #DIV/0! | #DIV/0!  | 0.000440583 | 1743.73 | 538.4   | -3.23872 |
|             |         |         |          | 0.000306351 | 1950.63 | 602.45  | -3.23782 |
| 0.0013688   | 881.325 | 263.4   | -3.34596 | 0.00175283  | 2283.28 | 706.4   | -3.23227 |
|             |         |         |          | 0.000354524 | 1876.63 | 580.667 | -3.23186 |
|             |         |         |          | 1.8096E-07  | 2970.83 | 919.25  | -3.23179 |
| 0.0016354   | 790.1   | 270.033 | -2.92594 | 0.000271933 | 2011.88 | 622.875 | -3.22998 |
| 0.000464262 | 709.85  | 262.3   | -2.70625 | 0.000316722 | 1619.1  | 501.65  | -3.22755 |
| 0.0153319   | 596.6   | 295.7   | -2.01759 | 0.00147711  | 1656.25 | 513.5   | -3.22541 |
|             |         |         |          | 0.000551655 | 2212.13 | 686.8   | -3.22092 |
| 0.00317901  | 1009.9  | 485.925 | -2.0783  | 9.44068E-06 | 2077.2  | 645.025 | -3.22034 |
| 6.29914E-06 | 806.05  | 202.4   | -3.98246 | 7.48574E-06 | 1542    | 479.05  | -3.21887 |
|             |         |         |          | 0.00699165  | 1168.63 | 363.2   | -3.2176  |
|             |         |         |          | 2.45496E-07 | 1350.83 | 420.1   | -3.2155  |
|             |         |         |          | 0.0217113   | 1116.2  | 347.2   | -3.21486 |



|         |             |         |         |          |             |         |         |          |
|---------|-------------|---------|---------|----------|-------------|---------|---------|----------|
|         | 0.00111973  | 2757.65 | 1003.2  | -2.74885 | 0.00002938  | 6939.75 | 2158.9  | -3.21448 |
|         | 0.0113291   | 728.875 | 245.425 | -2.96985 | 0.00477424  | 1550.95 | 482.85  | -3.21207 |
|         |             |         |         |          | 0.0108385   | 1018.18 | 317.1   | -3.2109  |
|         |             |         |         |          | 1.41498E-05 | 2686.2  | 837.525 | -3.20731 |
|         |             |         |         |          | 0.00777934  | 1505.58 | 469.6   | -3.20608 |
|         |             |         |         |          | 0.000140025 | 1471.1  | 459.033 | -3.20478 |
|         |             |         |         |          | 0.00222167  | 1599.68 | 499.3   | -3.20384 |
|         | 0.00145663  | 950.55  | 326.65  | -2.91    | 0.00661547  | 1897.25 | 592.225 | -3.2036  |
|         | 0.0067457   | 861.775 | 311.233 | -2.7689  | 0.00130189  | 1916.58 | 598.275 | -3.2035  |
|         | 0.000144275 | 1662.8  | 579.2   | -2.87086 | 1.48441E-05 | 3702.43 | 1156.13 | -3.20244 |
|         | 0.000980308 | 663.55  | 263.4   | -2.51917 | 0.00565425  | 1158.85 | 362     | -3.20124 |
|         |             |         |         |          | 0.00256669  | 1184.1  | 369.9   | -3.20114 |
|         |             |         |         |          | 0.00522258  | 1529.5  | 477.9   | -3.20046 |
|         |             |         |         |          | 0.00881138  | 1263.85 | 395.167 | -3.19827 |
|         |             |         |         |          | 0.00656881  | 1094.1  | 342.1   | -3.19819 |
|         |             |         |         |          | 0.000165027 | 2654.78 | 830.3   | -3.19737 |
|         |             |         |         |          | 0.019299    | 1060.77 | 331.867 | -3.19636 |
|         | 0.00266954  | 970.825 | 250.325 | -3.87826 | 0.00350954  | 982.875 | 307.633 | -3.19496 |
|         |             |         |         |          | 0.00585594  | 1576.35 | 493.4   | -3.19487 |
|         | 0.000478159 | 594.7   | 225.3   | -2.63959 | 2.21183E-05 | 1078.57 | 338.2   | -3.18914 |
|         |             |         |         |          | 0.00805642  | 1530.33 | 479.975 | -3.18834 |
|         |             |         |         |          | 0.0125685   | 1180.68 | 370.4   | -3.18757 |
|         |             |         |         |          | 4.02716E-06 | 1860.53 | 583.725 | -3.18733 |
|         |             |         |         |          | 0.0125986   | 1525.98 | 478.867 | -3.18664 |
|         | 0.00007591  | 937.875 | 300.6   | -3.12001 | 7.51639E-05 | 2077    | 652.075 | -3.18522 |
|         |             |         |         |          | 0.000169434 | 958.25  | 300.9   | -3.18461 |
|         | 0.000210128 | 799.9   | 257.35  | -3.10822 | 2.22134E-06 | 1214.5  | 381.55  | -3.18307 |
|         |             |         |         |          | 0.0053343   | 1447.6  | 454.9   | -3.18224 |
|         |             |         |         |          | 5.95397E-06 | 852.525 | 267.95  | -3.18166 |
|         | 0.000855118 | 704.9   | 304     | -2.31875 | 3.91695E-05 | 1900.68 | 597.45  | -3.18131 |
|         |             |         |         |          | 2.25262E-07 | 2061.63 | 648.825 | -3.17747 |
|         | 0.00118417  | 1337.78 | 579.025 | -2.31039 | 8.61841E-05 | 2727.5  | 858.9   | -3.17557 |
|         |             |         |         |          | 0.0118947   | 1862.1  | 586.4   | -3.17548 |
|         | 0.0122979   | 1040.3  | 424.1   | -2.45296 | 0.00570263  | 2567.18 | 809.25  | -3.17229 |
|         | 0.000238557 | 1346.2  | 466.975 | -2.88281 | 0.000015565 | 2726.48 | 859.525 | -3.17207 |
|         |             |         |         |          | 0.00348856  | 2224.95 | 702.2   | -3.16854 |
|         |             |         |         |          | 0.00124508  | 1308.03 | 412.85  | -3.1683  |
|         | 2.50715E-06 | 1670.5  | 645.55  | -2.58772 | 5.27487E-08 | 2166.28 | 683.875 | -3.16765 |
|         | 0.000803959 | 572.275 | 243.7   | -2.34828 | 1.18924E-05 | 1245.23 | 393.233 | -3.16663 |
|         |             |         |         |          | 0.000186262 | 1409.03 | 445.05  | -3.16601 |
|         |             |         |         |          | 7.51239E-05 | 4098.23 | 1296.65 | -3.16063 |
|         | 0.000438733 | 1885.58 | 551.467 | -3.4192  | 0.00390591  | 3896.58 | 1232.85 | -3.16062 |
|         |             |         |         |          | 0.00269423  | 848.1   | 268.35  | -3.16042 |
|         | 8.58033E-05 | 960.35  | 351.725 | -2.7304  | 0.000110947 | 2068.18 | 654.425 | -3.16029 |
| -3.364  | 1.16526E-09 | 7113.88 | 1613.2  | -4.40979 | 9.32786E-08 | 5586.8  | 1768.73 | -3.15866 |
|         |             |         |         |          | 0.0121927   | 2832.67 | 897.95  | -3.15459 |
|         |             |         |         |          | 0.00612598  | 860.85  | 272.9   | -3.15445 |
|         |             |         |         |          | 0.00115068  | 856.325 | 271.6   | -3.15289 |
|         |             |         |         |          | 0.00685405  | 929.5   | 294.9   | -3.15192 |
|         |             |         |         |          | 9.41837E-07 | 798.925 | 253.775 | -3.14816 |
|         |             |         |         |          | 0.0135035   | 1352.58 | 430.1   | -3.14479 |
|         |             |         |         |          | 2.65498E-05 | 1215.05 | 386.4   | -3.14454 |
|         |             |         |         |          | 4.59087E-06 | 2504.1  | 796.6   | -3.14348 |
|         |             |         |         |          | 0.00510257  | 1098.33 | 349.4   | -3.14348 |
| -3.1193 | 1.50576E-10 | 5252.1  | 1332.13 | -3.94265 | 1.02305E-09 | 3439.75 | 1094.25 | -3.14348 |
|         |             |         |         |          | 9.90926E-07 | 1669.05 | 530.975 | -3.14337 |
|         | 0.000324019 | 873.05  | 337.8   | -2.58452 | 0.00012352  | 2583.5  | 822.05  | -3.14275 |
|         |             |         |         |          | 0.000900917 | 1144.33 | 364.375 | -3.14051 |
|         |             |         |         |          | 0.000675249 | 1709.2  | 544.25  | -3.14047 |
|         |             |         |         |          | 0.00113616  | 1225.3  | 390.5   | -3.13777 |
|         | 0.00152857  | 698.4   | 279.875 | -2.4954  | 4.67799E-06 | 1586.98 | 505.867 | -3.13714 |
|         |             |         |         |          | 0.00194791  | 2130.95 | 680.375 | -3.13202 |
|         |             |         |         |          | 3.59809E-06 | 2058.25 | 657.575 | -3.13006 |

|             |             |         |          |             |             |         |          |          |
|-------------|-------------|---------|----------|-------------|-------------|---------|----------|----------|
|             |             |         |          | 0.000016257 | 1682.3      | 537.5   | -3.12986 |          |
|             |             |         |          | 0.00233123  | 1112.13     | 355.4   | -3.12922 |          |
|             |             |         |          | 0.00661405  | 2063.27     | 659.6   | -3.12806 |          |
|             |             |         |          | 0.0182916   | 733.1       | 234.5   | -3.12623 |          |
|             |             |         |          | 0.000256344 | 872.05      | 278.975 | -3.12591 |          |
|             |             |         |          | 3.4184E-07  | 2772.4      | 887.325 | -3.12445 |          |
| 0.00250873  | 820.725     | 399.3   | -2.05541 | 0.000238139 | 1771.43     | 567.1   | -3.12367 |          |
| 0.000348068 | 596.975     | 266.725 | -2.23817 | 2.15089E-05 | 1171.93     | 375.35  | -3.12222 |          |
|             |             |         |          | 0.0110419   | 1208.8      | 387.8   | -3.11707 |          |
|             |             |         |          | 2.06854E-05 | 1311.6      | 420.8   | -3.11692 |          |
|             |             |         |          | 3.93833E-06 | 2990.57     | 959.6   | -3.11647 |          |
|             |             |         |          | 0.00333277  | 1145.38     | 367.867 | -3.11356 |          |
|             |             |         |          | 0.00200537  | 2763.98     | 888.075 | -3.11232 |          |
|             |             |         |          | 2.07119E-05 | 916.267     | 294.5   | -3.11126 |          |
|             |             |         |          | 0.0015147   | 1798.63     | 578.9   | -3.10697 |          |
|             |             |         |          | 0.000223895 | 1630.88     | 525.2   | -3.10525 |          |
| 0.000363412 | 730.6       | 283.8   | -2.57435 | 0.00270164  | 1611.7      | 519.9   | -3.10002 |          |
|             |             |         |          | 0.00323198  | 1869.05     | 604.2   | -3.09343 |          |
|             |             |         |          | 0.00038592  | 1561.4      | 504.833 | -3.0929  |          |
|             |             |         |          | 0.00651886  | 1426.55     | 461.6   | -3.09045 |          |
| 0.000315879 | 978.733     | #DIV/0! | #DIV/0!  | 0.00131511  | 1602.1      | 518.85  | -3.08779 |          |
|             |             |         |          | 1.02916E-06 | 2724.63     | 882.45  | -3.08757 |          |
| 0.000324742 | 835.05      | 374.75  | -2.22829 | 4.17898E-06 | 1803.7      | 585.75  | -3.0793  |          |
|             |             |         |          | 0.00820882  | 1012.27     | 328.8   | -3.07867 |          |
|             |             |         |          | 0.00296762  | 1406.5      | 457.175 | -3.0765  |          |
| 0.000970884 | 1097.18     | 389.2   | -2.81905 | 0.000415878 | 2170.6      | 705.775 | -3.07548 |          |
|             |             |         |          | 5.6968E-08  | 1977.2      | 643     | -3.07496 |          |
| 0.00484095  | 1426.68     | 601.867 | -2.37042 | 0.00233532  | 3870.65     | 1259.63 | -3.07286 |          |
|             |             |         |          | 0.0202334   | 1092.93     | 355.725 | -3.07239 |          |
|             |             |         |          | 0.000423055 | 1107.5      | 360.825 | -3.06935 |          |
|             |             |         |          | 6.63468E-05 | 2095.83     | 683.2   | -3.06766 |          |
| 0.00013747  | 1092.55     | 399.133 | -2.73731 | 0.000358085 | 2091.13     | 681.775 | -3.06718 |          |
|             |             |         |          | 2.71479E-05 | 937.525     | 305.8   | -3.06581 |          |
|             |             |         |          | 4.20589E-05 | 1568.45     | 512.35  | -3.06129 |          |
| 1.28492E-08 | 2068.25     | 325.967 | -6.34497 | 3.57733E-05 | 1263.53     | 413.133 | -3.0584  |          |
|             |             |         |          | 0.0147782   | 1647.75     | 538.767 | -3.05837 |          |
|             |             |         |          | 0.000870238 | 2171.98     | 710.2   | -3.05826 |          |
|             |             |         |          | 2.10329E-06 | 859.175     | 280.95  | -3.05811 |          |
|             |             |         |          | 0.0050014   | 1052.78     | 344.533 | -3.05565 |          |
| -4.6364     | 7.69378E-11 | 5659.9  | 975.15   | -5.80413    | 2.27489E-07 | 3130.98 | 1025.35  | -3.05357 |
|             |             |         |          |             | 0.00450655  | 2542.58 | 832.7    | -3.05341 |
|             |             |         |          |             | 0.000461178 | 4090.55 | 1340.2   | -3.05219 |
|             |             |         |          |             | 0.0158464   | 1048.88 | 344      | -3.04906 |
| 0.000549471 | 1350.3      | 459.6   | -2.93799 | 0.000121782 | 2914.1      | 955.833 | -3.04875 |          |
| 0.0153687   | 597.275     | 243.6   | -2.45187 | 6.55569E-06 | 1644.58     | 539.833 | -3.04645 |          |
|             |             |         |          | 9.17524E-06 | 1718.95     | 564.6   | -3.04454 |          |
|             |             |         |          | 0.00155707  | 9650.18     | 3170.28 | -3.04396 |          |
|             |             |         |          | 2.80352E-08 | 2522.3      | 829     | -3.04258 |          |
|             |             |         |          | 0.013759    | 2551.93     | 839.6   | -3.03945 |          |
|             |             |         |          | 0.00662682  | 3308.8      | 1088.7  | -3.03922 |          |
|             |             |         |          | 0.00644707  | 812.325     | 267.65  | -3.03503 |          |
|             |             |         |          | 8.6245E-07  | 1499.65     | 494.275 | -3.03404 |          |
| 0.00271394  | 633.2       | 172.4   | -3.67285 | 0.00178415  | 1173.78     | 386.95  | -3.0334  |          |
|             |             |         |          | 0.000274805 | 1908.23     | 629.35  | -3.03206 |          |
|             |             |         |          | 2.19671E-05 | 1832.73     | 604.6   | -3.03132 |          |
|             |             |         |          | 0.00483816  | 1190.85     | 392.9   | -3.03092 |          |
|             |             |         |          | 0.00311599  | 1554.08     | 513.15  | -3.0285  |          |
|             |             |         |          | 0.00163885  | 2662.13     | 879.033 | -3.02847 |          |
|             |             |         |          | 0.00807353  | 1131.13     | 373.6   | -3.02764 |          |
|             |             |         |          | 0.00586968  | 2229.33     | 736.8   | -3.02569 |          |
|             |             |         |          | 0.000636139 | 1100.25     | 363.9   | -3.0235  |          |
| 4.80068E-05 | 1726.83     | 627.475 | -2.75202 | 1.68426E-05 | 3747.48     | 1240.33 | -3.02137 |          |
| 5.68345E-07 | 4346.53     | 1945.33 | -2.23434 | 2.89413E-09 | 3277.18     | 1084.9  | -3.02072 |          |

|         |             |         |         |          |             |         |         |          |
|---------|-------------|---------|---------|----------|-------------|---------|---------|----------|
|         | 1.55823E-05 | 748.825 | 200.05  | -3.74319 | 0.000109359 | 979.775 | 324.45  | -3.0198  |
|         | 1.16294E-07 | 620.825 | 170.85  | -3.63374 | 6.54305E-06 | 937.4   | 310.533 | -3.01868 |
|         | 0.00209174  | 653.25  | 245.6   | -2.65981 | 7.53169E-05 | 1285.35 | 425.85  | -3.01832 |
|         |             |         |         |          | 1.38708E-06 | 1599.35 | 530.175 | -3.01665 |
|         | 0.00582864  | 573.05  | #DIV/0! | #DIV/0!  | 0.000146888 | 1298.98 | 431.3   | -3.01177 |
|         |             |         |         |          | 0.00178799  | 1523.65 | 506.1   | -3.01057 |
|         |             |         |         |          | 5.53033E-08 | 1318.95 | 438.325 | -3.00907 |
|         | 5.36361E-08 | 1152.3  | 352.5   | -3.26894 | 1.2859E-07  | 2110.13 | 702     | -3.00588 |
|         |             |         |         |          | 0.0215413   | 1898.33 | 631.75  | -3.00488 |
|         | 0.000195443 | 591.725 | 210.9   | -2.80571 | 0.000120005 | 1010.63 | 336.7   | -3.00158 |
|         |             |         |         |          | 0.00170843  | 1073.6  | 357.9   | -2.99972 |
|         | 0.00046999  | 946.2   | 439.525 | -2.15278 | 3.40961E-06 | 2101.73 | 701.025 | -2.99807 |
|         |             |         |         |          | 0.00916434  | 1033.45 | 344.733 | -2.99782 |
|         |             |         |         |          | 0.017444    | 948.7   | 316.55  | -2.997   |
|         |             |         |         |          | 0.00295903  | 1159.8  | 387.35  | -2.99419 |
|         |             |         |         |          | 0.000498686 | 2032.7  | 679.5   | -2.99146 |
|         | 0.00481111  | 876.833 | 386.6   | -2.26806 | 0.000134422 | 1864.7  | 623.65  | -2.98998 |
|         | 0.000166738 | 724.8   | #DIV/0! | #DIV/0!  | 0.0223075   | 1383.05 | 462.85  | -2.98812 |
|         |             |         |         |          | 0.0168308   | 1488.55 | 498.467 | -2.98626 |
|         |             |         |         |          | 3.89367E-10 | 1886.3  | 631.75  | -2.98583 |
|         | 6.78696E-05 | 634.225 | 206.367 | -3.07329 | 2.76664E-05 | 1111.57 | 372.467 | -2.98434 |
|         | 9.81877E-05 | 1279.75 | 600.425 | -2.13141 | 5.8796E-08  | 3190.98 | 1071.53 | -2.97798 |
|         |             |         |         |          | 0.00913922  | 1331.3  | 447.05  | -2.97797 |
|         |             |         |         |          | 0.000675759 | 2295.9  | 771.15  | -2.97724 |
|         |             |         |         |          | 6.99846E-07 | 2756.93 | 926.3   | -2.97628 |
|         |             |         |         |          | 0.0186679   | 1037.15 | 349.1   | -2.97093 |
|         | 7.07118E-05 | 1960.28 | 523.1   | -3.74742 | 0.000288585 | 3823.85 | 1287.25 | -2.97056 |
|         |             |         |         |          | 0.000589258 | 1672.7  | 563.5   | -2.96841 |
|         | 4.70706E-07 | 838.1   | 285.15  | -2.93915 | 2.97284E-06 | 1997.8  | 673.325 | -2.96707 |
|         |             |         |         |          | 1.98404E-05 | 791.75  | 266.9   | -2.96647 |
|         | 0.000400468 | 2269.93 | 666.275 | -3.40689 | 0.000584694 | 3089.08 | 1041.98 | -2.96463 |
|         |             |         |         |          | 0.00399328  | 798.1   | 269.4   | -2.96251 |
| -2.1019 | 3.79744E-08 | 1690.38 | 612.425 | -2.76013 | 1.33185E-08 | 2848.13 | 961.525 | -2.96209 |
|         |             |         |         |          | 0.000266646 | 1890.58 | 638.4   | -2.96143 |
|         |             |         |         |          | 0.00790345  | 1563.45 | 529.133 | -2.95474 |
|         |             |         |         |          | 0.000362601 | 1615.3  | 546.7   | -2.95464 |
|         | 0.0010185   | 842.95  | 348.65  | -2.41775 | 8.63108E-05 | 1870.1  | 633.333 | -2.95279 |
|         |             |         |         |          | 0.000151074 | 1868.88 | 633.1   | -2.95194 |
|         |             |         |         |          | 0.0079894   | 1337.38 | 453.125 | -2.95145 |
|         | 2.15009E-05 | 951.95  | 331.233 | -2.87396 | 5.17678E-07 | 1942.27 | 658.567 | -2.94923 |
|         |             |         |         |          | 0.00893875  | 1182.2  | 401.1   | -2.94739 |
|         | 0.00046655  | 791.7   | 328.6   | -2.40931 | 5.78721E-05 | 1925.45 | 653.433 | -2.94667 |
|         |             |         |         |          | 0.00717768  | 1181.75 | 401.05  | -2.94664 |
|         | 0.00298271  | 804.633 | 210.4   | -3.8243  | 0.000325863 | 1719.43 | 583.533 | -2.94659 |
|         | 0.00233823  | 673.233 | #DIV/0! | #DIV/0!  | 0.000331395 | 1984.8  | 674.9   | -2.94088 |
|         |             |         |         |          | 0.00863805  | 837.4   | 284.9   | -2.93928 |
|         | 8.64595E-05 | 977.925 | 444.1   | -2.20204 | 7.48528E-07 | 1769.88 | 602.167 | -2.93918 |
|         | 2.01031E-05 | 1805.43 | 722.425 | -2.49912 | 5.90858E-06 | 3300.8  | 1123.9  | -2.93692 |
|         |             |         |         |          | 1.29114E-05 | 1466.08 | 499.4   | -2.93567 |
|         | 0.00268103  | 1160.83 | 398.6   | -2.91226 | 0.00276037  | 2628.88 | 895.667 | -2.9351  |
|         |             |         |         |          | 0.00684103  | 1620.33 | 552.433 | -2.93307 |
|         |             |         |         |          | 0.003542    | 1640.57 | 559.4   | -2.93273 |
|         | 0.000348482 | 974.6   | 319.85  | -3.04705 | 0.016678    | 1503.85 | 513.233 | -2.93015 |
|         | 0.000523758 | 599.275 | #DIV/0! | #DIV/0!  | 0.00534183  | 1676.65 | 572.433 | -2.92899 |
|         |             |         |         |          | 0.0143357   | 662.7   | 226.4   | -2.92712 |
|         | 0.00011919  | 998.867 | #DIV/0! | #DIV/0!  | 7.69536E-05 | 1782.3  | 609.5   | -2.9242  |
| -2.6329 | 2.93431E-08 | 3075.18 | 879.45  | -3.4967  | 2.40831E-07 | 4211.2  | 1440.4  | -2.92363 |
|         | 0.000176405 | 1678.05 | 680.9   | -2.46446 | 1.09797E-06 | 2420.33 | 827.9   | -2.92345 |
|         | 0.0109972   | 510.425 | 205.35  | -2.48563 | 5.21427E-05 | 1072.73 | 367     | -2.92296 |
|         |             |         |         |          | 0.000316845 | 3058.7  | 1047.37 | -2.92037 |
|         |             |         |         |          | 9.70656E-05 | 1953.1  | 668.975 | -2.91954 |
| -2.7662 | 2.99212E-05 | 2794.95 | 947.7   | -2.94919 | 0.000139487 | 2875.73 | 985.45  | -2.91818 |
|         |             |         |         |          | 0.00307566  | 1677.25 | 575.125 | -2.91632 |

|             |         |         |          |             |         |         |          |
|-------------|---------|---------|----------|-------------|---------|---------|----------|
|             |         |         |          | 0.00820761  | 1514.23 | 519.233 | -2.91627 |
|             |         |         |          | 0.00196677  | 1491.75 | 511.65  | -2.91557 |
| 0.000358448 | 1857.23 | 895.075 | -2.07494 | 5.40646E-06 | 3632.35 | 1245.95 | -2.91533 |
|             |         |         |          | 0.000390697 | 1134.17 | 389.067 | -2.9151  |
|             |         |         |          | 1.24195E-06 | 2057.35 | 706.1   | -2.91368 |
|             |         |         |          | 6.40868E-06 | 1003.07 | 344.6   | -2.91081 |
| 1.13184E-06 | 1198.93 | 352.1   | -3.40509 | 5.6655E-07  | 2395.63 | 823.8   | -2.90802 |
|             |         |         |          | 0.00538746  | 829     | 285.1   | -2.90775 |
|             |         |         |          | 0.000340265 | 1303.78 | 448.4   | -2.90762 |
| 0.00617533  | 1031.65 | 470.4   | -2.19313 | 0.00030619  | 2184.98 | 751.675 | -2.90681 |
|             |         |         |          | 1.44454E-06 | 1704.73 | 587.4   | -2.90215 |
| 0.00103251  | 2308.9  | 939.25  | -2.45824 | 0.000128776 | 5511.13 | 1899.05 | -2.90204 |
|             |         |         |          | 3.06559E-06 | 1935.05 | 666.875 | -2.90167 |
|             |         |         |          | 0.00363885  | 1436.15 | 495.1   | -2.90073 |
|             |         |         |          | 0.00276851  | 2168.45 | 747.7   | -2.90016 |
|             |         |         |          | 0.00100117  | 2363.33 | 815.233 | -2.89896 |
|             |         |         |          | 0.00103213  | 2510.5  | 866.4   | -2.89762 |
| 5.23288E-07 | 653.2   | 182.4   | -3.58114 | 4.32352E-05 | 899.7   | 310.5   | -2.89758 |
| 9.47233E-05 | 547.8   | #DIV/0! | #DIV/0!  | 0.00170763  | 1286.17 | 443.9   | -2.89742 |
| 0.00141658  | 820.9   | 303.333 | -2.70626 | 0.000539186 | 1746.73 | 603.15  | -2.896   |
| 7.74532E-05 | 2124.53 | 678.833 | -3.12967 | 1.52262E-05 | 4098.88 | 1415.65 | -2.8954  |
| 2.87786E-06 | 2013.93 | 884.2   | -2.27768 | 4.73008E-08 | 3811.43 | 1316.58 | -2.89495 |
|             |         |         |          | 0.00295625  | 987.3   | 341.175 | -2.89382 |
|             |         |         |          | 7.84397E-05 | 1658.3  | 573.567 | -2.89121 |
|             |         |         |          | 3.26758E-05 | 1412.83 | 489     | -2.88921 |
|             |         |         |          | 0.00441215  | 1707.08 | 591.575 | -2.88564 |
|             |         |         |          | 2.53298E-06 | 1744    | 604.4   | -2.88551 |
|             |         |         |          | 0.00449316  | 1648.75 | 571.675 | -2.88407 |
| 4.70247E-05 | 918.925 | 334.667 | -2.74579 | 1.35983E-05 | 1474.93 | 511.575 | -2.88311 |
|             |         |         |          | 0.000173651 | 2321.03 | 805.25  | -2.88237 |
| 0.000368618 | 633.3   | 267.1   | -2.37102 | 0.000591016 | 1719.73 | 597.325 | -2.87906 |
| 4.58147E-05 | 1558    | 624.3   | -2.4956  | 7.58751E-06 | 3083.6  | 1071.58 | -2.87763 |
| 1.07276E-06 | 831.8   | #DIV/0! | #DIV/0!  | 7.18965E-05 | 1335.9  | 464.825 | -2.87398 |
|             |         |         |          | 4.40593E-09 | 41122   | 14316.3 | -2.87239 |
|             |         |         |          | 0.0104462   | 717.333 | 250     | -2.86933 |
| 0.00817324  | 871.475 | #DIV/0! | #DIV/0!  | 0.00740753  | 2098.45 | 731.367 | -2.86922 |
| 0.00277528  | 751.275 | 254.433 | -2.95274 | 0.00228514  | 1573.5  | 548.425 | -2.86913 |
| 1.27712E-05 | 942.025 | 465.45  | -2.0239  | 1.77169E-09 | 1360.4  | 474.433 | -2.86742 |
| 0.000358312 | 543.975 | 225.2   | -2.41552 | 0.000822237 | 1540.33 | 537.8   | -2.86414 |
|             |         |         |          | 0.011874    | 915.775 | 319.833 | -2.86329 |
|             |         |         |          | 0.000249284 | 1426.77 | 498.3   | -2.86327 |
|             |         |         |          | 0.000300568 | 2019.4  | 705.367 | -2.86291 |
|             |         |         |          | 3.36367E-06 | 1973.2  | 689.9   | -2.86012 |
|             |         |         |          | 0.0032924   | 1980    | 692.3   | -2.86003 |
|             |         |         |          | 0.00866337  | 1581.95 | 553.475 | -2.85821 |
|             |         |         |          | 4.29869E-05 | 1309.83 | 458.4   | -2.85738 |
|             |         |         |          | 8.72792E-05 | 1433.5  | 501.75  | -2.857   |
|             |         |         |          | 0.00258467  | 1327.63 | 464.9   | -2.85574 |
|             |         |         |          | 1.27196E-05 | 1506    | 527.45  | -2.85525 |
| 0.00229097  | 685.15  | 150.75  | -4.54494 | 0.0182699   | 1298.28 | 454.9   | -2.85398 |
|             |         |         |          | 3.03787E-07 | 2861.93 | 1003.53 | -2.85187 |
|             |         |         |          | 1.23859E-05 | 3583.53 | 1257.2  | -2.8504  |
| 4.55376E-05 | 767.15  | 365.65  | -2.09804 | 3.36615E-05 | 873.467 | 306.933 | -2.84579 |
|             |         |         |          | 1.30171E-05 | 2066.9  | 726.533 | -2.84488 |
|             |         |         |          | 0.00965699  | 1023.87 | 360.1   | -2.84328 |
| 0.000119753 | 1554.2  | 729.375 | -2.13087 | 6.60476E-07 | 2408.48 | 847.35  | -2.84236 |
| 3.13937E-05 | 856.35  | 367.325 | -2.33131 | 2.98048E-05 | 1464.35 | 515.4   | -2.84119 |
|             |         |         |          | 0.0020686   | 1026.97 | 362.3   | -2.83458 |
|             |         |         |          | 1.3408E-06  | 1931.65 | 681.6   | -2.83399 |
|             |         |         |          | 0.00859402  | 1223.75 | 431.833 | -2.83385 |
|             |         |         |          | 0.00119616  | 1248.43 | 440.567 | -2.83368 |
| 8.84502E-09 | 775.825 | 197.3   | -3.93221 | 1.45199E-05 | 1430.15 | 504.9   | -2.83254 |
|             |         |         |          | 0.0144953   | 1120.4  | 395.85  | -2.83037 |

|         |             |         |         |          |             |         |         |          |
|---------|-------------|---------|---------|----------|-------------|---------|---------|----------|
|         |             |         |         |          | 0.00394179  | 4907.15 | 1733.8  | -2.83029 |
|         |             |         |         |          | 0.0014182   | 1354    | 478.933 | -2.82712 |
|         |             |         |         |          | 0.000150032 | 2294    | 811.5   | -2.82686 |
|         | 0.011649    | 1072.5  | 495.3   | -2.16535 | 6.11421E-06 | 1954.78 | 691.8   | -2.82564 |
|         |             |         |         |          | 3.13578E-08 | 253663  | 89961   | -2.8197  |
|         | 6.75119E-05 | 590.45  | 210.633 | -2.80321 | 0.000137673 | 1272.65 | 451.825 | -2.81669 |
|         |             |         |         |          | 0.00133336  | 1336.63 | 474.725 | -2.81558 |
|         |             |         |         |          | 1.01151E-06 | 954.275 | 339     | -2.81497 |
| -3.7637 | 5.00012E-13 | 5313.7  | 923.175 | -5.7559  | 5.07807E-08 | 3934.6  | 1399.08 | -2.81229 |
|         | 0.000190791 | 8161.28 | 3356.05 | -2.43181 | 1.84959E-05 | 16782.3 | 5967.58 | -2.81224 |
|         |             |         |         |          | 0.00299163  | 1908.88 | 679     | -2.8113  |
|         |             |         |         |          | 0.0161444   | 924.975 | 329.15  | -2.81019 |
|         |             |         |         |          | 1.41898E-06 | 4635.73 | 1650.65 | -2.80842 |
|         | 0.0015595   | 711.575 | 336.525 | -2.11448 | 3.26044E-05 | 1192    | 425     | -2.80471 |
|         |             |         |         |          | 0.0157765   | 798.925 | 285     | -2.80325 |
|         | 1.04016E-06 | 1935.68 | 883.9   | -2.18993 | 8.79159E-08 | 3234.85 | 1154.33 | -2.80237 |
|         |             |         |         |          | 0.00312308  | 1846.07 | 660.133 | -2.79651 |
|         | 8.77918E-05 | 3696.18 | 1390.68 | -2.65783 | 1.32956E-05 | 6055.8  | 2165.6  | -2.79636 |
|         |             |         |         |          | 0.000155283 | 1570.83 | 561.9   | -2.79557 |
|         |             |         |         |          | 2.95246E-05 | 1360.9  | 486.95  | -2.79474 |
|         |             |         |         |          | 2.35466E-06 | 1230.68 | 440.6   | -2.79318 |
|         | 1.15085E-05 | 1459.08 | 478.5   | -3.04927 | 2.42198E-06 | 2251.33 | 806.067 | -2.79298 |
|         | 0.000140628 | 2903.38 | 1266.93 | -2.29167 | 1.99235E-06 | 5949.55 | 2130.33 | -2.79279 |
|         |             |         |         |          | 0.000309088 | 1709.5  | 612.25  | -2.79216 |
|         |             |         |         |          | 0.00377225  | 973.9   | 349.3   | -2.78815 |
|         |             |         |         |          | 0.00453339  | 877.25  | 314.7   | -2.78758 |
|         |             |         |         |          | 0.00183634  | 813.1   | 291.7   | -2.78745 |
|         |             |         |         |          | 0.0113133   | 1334.33 | 478.75  | -2.78712 |
|         |             |         |         |          | 0.00959327  | 1046.13 | 375.4   | -2.78669 |
|         |             |         |         |          | 0.00158656  | 1474.73 | 529.325 | -2.78605 |
|         |             |         |         |          | 0.00476023  | 1842.58 | 661.5   | -2.78545 |
|         |             |         |         |          | 0.00601455  | 2015.08 | 723.5   | -2.78518 |
|         |             |         |         |          | 0.00849603  | 1882.78 | 676     | -2.78517 |
|         |             |         |         |          | 2.91803E-07 | 968.567 | 348     | -2.78324 |
|         | 4.63679E-06 | 1012.4  | 325.075 | -3.11436 | 4.59337E-05 | 1994.73 | 717.15  | -2.78146 |
|         | 0.00106931  | 803.8   | 260.8   | -3.08206 | 0.00268373  | 1652    | 594.6   | -2.77834 |
|         |             |         |         |          | 1.04593E-08 | 1504.3  | 541.5   | -2.77802 |
|         | 0.000399274 | 4276.3  | 1946.3  | -2.19714 | 5.13662E-06 | 10086.1 | 3631.05 | -2.77774 |
|         | 0.000341442 | 942.325 | 363.267 | -2.59403 | 3.60939E-05 | 1758.5  | 633.333 | -2.77658 |
|         | 8.46119E-06 | 1943.53 | 933.975 | -2.08092 | 4.1539E-08  | 3396.93 | 1223.8  | -2.77572 |
|         |             |         |         |          | 0.000252184 | 1699.97 | 612.9   | -2.77364 |
|         | 0.000529348 | 573     | 184.6   | -3.10401 | 0.000372993 | 1430.75 | 516.05  | -2.7725  |
|         |             |         |         |          | 0.0104467   | 1464.03 | 528.1   | -2.77227 |
|         | 0.000640938 | 751.6   | 232     | -3.23966 | 5.59142E-05 | 1432.75 | 516.967 | -2.77146 |
|         | 0.00485382  | 581.075 | 241.65  | -2.40461 | 0.0038047   | 1039.07 | 374.933 | -2.77134 |
|         |             |         |         |          | 0.0221912   | 1880.35 | 679.267 | -2.76821 |
|         |             |         |         |          | 0.0069439   | 895.867 | 323.633 | -2.76815 |
|         | 0.000469964 | 562.2   | #DIV/0! | #DIV/0!  | 0.0105567   | 1437.37 | 519.533 | -2.76665 |
|         |             |         |         |          | 6.67506E-07 | 1694.83 | 612.625 | -2.7665  |
| -2.5506 | 6.14063E-07 | 2718.95 | 895.15  | -3.03742 | 2.58414E-06 | 3608.65 | 1305.25 | -2.76472 |
|         |             |         |         |          | 0.000765719 | 4120.08 | 1492.75 | -2.76006 |
|         |             |         |         |          | 5.66064E-05 | 1298.4  | 471.133 | -2.75591 |
|         |             |         |         |          | 0.000184031 | 1514.65 | 549.633 | -2.75575 |
|         |             |         |         |          | 0.00122012  | 1730.9  | 628.133 | -2.75563 |
|         | 9.01561E-06 | 15671.3 | 5758.98 | -2.72119 | 0.000002746 | 32876.1 | 11935.5 | -2.75448 |
|         |             |         |         |          | 0.00094596  | 754.825 | 274.2   | -2.75283 |
|         | 0.000284388 | 679.3   | 311.7   | -2.17934 | 0.00064928  | 1260.47 | 458.375 | -2.74986 |
|         |             |         |         |          | 1.07851E-05 | 1526.78 | 555.467 | -2.74863 |
|         |             |         |         |          | 3.47966E-05 | 1069.15 | 389.067 | -2.74799 |
|         |             |         |         |          | 0.00641504  | 1290.98 | 469.8   | -2.74792 |
|         |             |         |         |          | 4.47621E-06 | 1497.83 | 545.075 | -2.74792 |
|         |             |         |         |          | 0.00883358  | 2859.9  | 1040.78 | -2.74786 |
|         |             |         |         |          | 0.00218411  | 1668.53 | 607.567 | -2.74624 |

|             |             |         |          |             |         |         |          |
|-------------|-------------|---------|----------|-------------|---------|---------|----------|
|             |             |         |          | 8.27426E-05 | 1966.78 | 716.95  | -2.74325 |
| 0.000031123 | 983.175     | 391.525 | -2.51114 | 0.000222678 | 2292.15 | 835.675 | -2.74287 |
|             |             |         |          | 0.0104564   | 1987.58 | 724.9   | -2.74186 |
| 2.48487E-05 | 726.467     | 186.7   | -3.89109 | 5.68736E-05 | 1220.65 | 445.3   | -2.74119 |
| 0.00397335  | 753.733     | 276.433 | -2.72664 | 0.0159363   | 1255.47 | 458.167 | -2.7402  |
|             |             |         |          | 1.32759E-08 | 1288.03 | 470.2   | -2.73933 |
| 0.00484216  | 691.95      | 304.033 | -2.2759  | 0.000551024 | 1357.38 | 496.05  | -2.73637 |
|             |             |         |          | 0.00470067  | 1226.93 | 448.7   | -2.73442 |
|             |             |         |          | 2.65213E-05 | 2427.65 | 888.525 | -2.73222 |
|             |             |         |          | 6.29685E-05 | 2975.65 | 1091.88 | -2.72527 |
|             |             |         |          | 0.00555547  | 1083.45 | 397.6   | -2.72497 |
|             |             |         |          | 0.00806712  | 930.8   | 341.6   | -2.72482 |
| 9.31369E-05 | 825.85      | 357.833 | -2.30792 | 5.30665E-05 | 2022.63 | 742.575 | -2.7238  |
| 1.04296E-05 | 3001.23     | 1238.68 | -2.42293 | 1.31343E-06 | 6136.03 | 2254.28 | -2.72195 |
|             |             |         |          | 7.63974E-08 | 1878.4  | 691.425 | -2.71671 |
|             |             |         |          | 2.58292E-05 | 1690.78 | 622.525 | -2.716   |
|             |             |         |          | 0.0102665   | 856.467 | 315.5   | -2.71463 |
| 5.84565E-07 | 807.467     | 362.9   | -2.22504 | 0.000324507 | 1826.18 | 673.25  | -2.71248 |
| 0.00150381  | 839.625     | 304.933 | -2.75347 | 0.00616064  | 1539.53 | 567.6   | -2.71234 |
|             |             |         |          | 0.00745078  | 945.467 | 348.8   | -2.71063 |
|             |             |         |          | 0.012859    | 1218.43 | 449.6   | -2.71004 |
|             |             |         |          | 1.71154E-05 | 1486.3  | 548.5   | -2.70975 |
|             |             |         |          | 0.000180306 | 875.3   | 323.167 | -2.70851 |
| 0.0113208   | 599.267     | #DIV/0! | #DIV/0!  | 0.000120775 | 1249.23 | 461.4   | -2.70747 |
|             |             |         |          | 3.83753E-06 | 980.25  | 362.067 | -2.70737 |
|             |             |         |          | 0.0129236   | 1004.9  | 371.4   | -2.70571 |
|             |             |         |          | 6.64105E-06 | 1152.67 | 426.2   | -2.70452 |
|             |             |         |          | 0.000502984 | 632.833 | 234     | -2.70442 |
|             |             |         |          | 0.00197709  | 1288.13 | 476.6   | -2.70276 |
|             |             |         |          | 0.00630901  | 1896.93 | 702.4   | -2.70063 |
| 0.000200326 | 744.275     | 319.925 | -2.3264  | 2.91049E-06 | 1325.9  | 491.05  | -2.70013 |
| 0.000260672 | 755.275     | 371.475 | -2.03318 | 8.69948E-06 | 1840.53 | 682.125 | -2.69822 |
|             |             |         |          | 0.0179982   | 958.9   | 355.467 | -2.69758 |
| 0.00509078  | 938.7       | 449.867 | -2.08662 | 0.000758429 | 1774.63 | 658     | -2.69701 |
|             |             |         |          | 1.19731E-06 | 20872.4 | 7742.77 | -2.69573 |
|             |             |         |          | 0.000393356 | 1403.55 | 520.75  | -2.69525 |
|             |             |         |          | 0.00296631  | 2238.03 | 830.6   | -2.69447 |
| 0.00248653  | 546.1       | #DIV/0! | #DIV/0!  | 0.00438143  | 1194.9  | 443.5   | -2.69425 |
|             |             |         |          | 5.32633E-05 | 4103.43 | 1526.33 | -2.68842 |
| 3.88816E-05 | 937.375     | 428.15  | -2.18936 | 4.49926E-07 | 1183.85 | 440.45  | -2.68782 |
|             |             |         |          | 0.0126364   | 779.733 | 290.25  | -2.68642 |
|             |             |         |          | 1.67611E-05 | 858.35  | 319.533 | -2.68626 |
|             |             |         |          | 0.000859305 | 1300.5  | 484.3   | -2.68532 |
| 0.0126829   | 27117.2     | 10673.6 | -2.54059 | 0.00319323  | 74205.6 | 27641.2 | -2.68461 |
|             |             |         |          | 0.011623    | 934.567 | 348.2   | -2.68399 |
| 0.000688544 | 1692.27     | 557.825 | -3.03369 | 0.000029536 | 2433.13 | 906.575 | -2.68387 |
|             |             |         |          | 0.0212182   | 1201.78 | 448.225 | -2.68119 |
|             |             |         |          | 2.63085E-06 | 1913.9  | 713.9   | -2.68091 |
| 0.00535528  | 1595.43     | #DIV/0! | #DIV/0!  | 0.00837628  | 2832.37 | 1056.85 | -2.68001 |
|             |             |         |          | 2.60809E-05 | 2623.83 | 979.45  | -2.67888 |
| 0.000404144 | 771.275     | 318.225 | -2.42368 | 0.000209945 | 1141.8  | 426.45  | -2.67745 |
| 0.000749164 | 670.9       | 259.767 | -2.5827  | 0.000325931 | 1412.25 | 527.525 | -2.67712 |
| 0.000250975 | 736.125     | 347.767 | -2.11672 | 0.00021243  | 1209.15 | 452.167 | -2.67412 |
|             |             |         |          | 0.00803186  | 877.475 | 328.15  | -2.67401 |
| -3.8338     | 3.46601E-10 | 3468.43 | 716.967  | 2.55866E-06 | 2534.35 | 948     | -2.67336 |
|             | 0.00135562  | 534.8   | 169.2    | 0.000491931 | 1156.48 | 432.633 | -2.67311 |
|             |             |         |          | 0.000472016 | 1397.95 | 523.3   | -2.67141 |
|             | 0.00462261  | 1308.15 | 268.1    | 0.00695783  | 2211.15 | 828.5   | -2.66886 |
|             |             |         |          | 8.1476E-07  | 1799.05 | 675.55  | -2.66309 |
|             |             |         |          | 0.000711155 | 1269.6  | 477.233 | -2.66033 |
| 0.000172585 | 714.075     | #DIV/0! | #DIV/0!  | 0.000119712 | 1435.23 | 539.8   | -2.65881 |
| 0.00320283  | 3346.13     | 1668.83 | -2.00508 | 4.83715E-05 | 6100.88 | 2295.2  | -2.6581  |
|             |             |         |          | 0.000932007 | 2118.2  | 796.9   | -2.65805 |

|         |             |         |         |          |             |         |         |          |
|---------|-------------|---------|---------|----------|-------------|---------|---------|----------|
|         |             |         |         |          | 0.000504979 | 1179.43 | 443.8   | -2.65756 |
|         | 0.00452396  | 617.15  | #DIV/0! | #DIV/0!  | 0.0136445   | 1214.53 | 457.267 | -2.65605 |
|         |             |         |         |          | 0.000375514 | 1052.2  | 396.467 | -2.65394 |
|         | 0.00134071  | 870.333 | #DIV/0! | #DIV/0!  | 0.000892909 | 1794.17 | 676.9   | -2.65056 |
|         | 5.76053E-06 | 571.4   | 244.3   | -2.33893 | 4.73159E-07 | 1296.7  | 489.25  | -2.65038 |
|         |             |         |         |          | 2.19999E-08 | 1922.68 | 726.35  | -2.64704 |
|         | 2.19283E-05 | 2803.25 | 765.875 | -3.66019 | 0.000344918 | 5410.2  | 2046.13 | -2.64412 |
| -2.5762 | 4.22131E-12 | 25683.1 | 6933.53 | -3.70419 | 9.02232E-10 | 10688.6 | 4043.2  | -2.64359 |
|         |             |         |         |          | 0.00157007  | 609.275 | 230.75  | -2.64041 |
|         | 0.00130954  | 524.275 | 140.9   | -3.7209  | 0.00390993  | 1170.97 | 443.675 | -2.63924 |
|         |             |         |         |          | 0.00021693  | 1686.47 | 639     | -2.63923 |
|         |             |         |         |          | 0.000403912 | 2423.38 | 918.7   | -2.63783 |
|         | 0.00244602  | 1408    | 476.6   | -2.95426 | 0.00163586  | 2909    | 1103    | -2.63735 |
|         |             |         |         |          | 0.00694316  | 1374.68 | 521.5   | -2.636   |
|         | 0.000135028 | 1433.53 | 683     | -2.09887 | 1.48789E-06 | 2888.08 | 1095.7  | -2.63583 |
|         |             |         |         |          | 0.0048794   | 4054.57 | 1539.08 | -2.63442 |
|         |             |         |         |          | 4.77094E-05 | 1404.18 | 533.067 | -2.63415 |
|         | 0.0139837   | 656     | 264     | -2.48485 | 0.00782216  | 1371.45 | 521.45  | -2.63007 |
|         | 0.00562622  | 1085.8  | 538.525 | -2.01625 | 0.000355959 | 1913.95 | 727.95  | -2.62923 |
|         |             |         |         |          | 7.98993E-05 | 2149.05 | 817.775 | -2.62792 |
|         |             |         |         |          | 0.000450488 | 1235.2  | 470.133 | -2.62734 |
|         |             |         |         |          | 0.000708398 | 2579.6  | 982.075 | -2.62668 |
|         |             |         |         |          | 0.00866211  | 845.267 | 321.8   | -2.62668 |
|         |             |         |         |          | 0.00236965  | 1952.9  | 743.6   | -2.62628 |
|         |             |         |         |          | 0.000220011 | 779.633 | 296.9   | -2.62591 |
|         |             |         |         |          | 0.00125327  | 1271.6  | 484.4   | -2.6251  |
|         |             |         |         |          | 3.54045E-06 | 1453.27 | 553.65  | -2.62488 |
| -2.3744 | 0.000193529 | 1317.03 | 641     | -2.05464 | 7.39632E-07 | 904.9   | 344.925 | -2.62347 |
|         |             |         |         |          | 0.000785179 | 3396.38 | 1294.85 | -2.62299 |
|         |             |         |         |          | 0.00279223  | 1498.8  | 571.65  | -2.62188 |
|         |             |         |         |          | 0.00152279  | 1385.35 | 528.4   | -2.62178 |
|         |             |         |         |          | 0.000551777 | 2748.93 | 1048.55 | -2.62164 |
|         | 7.97798E-08 | 934.175 | 360.7   | -2.58989 | 1.28205E-07 | 1343.98 | 512.9   | -2.62035 |
|         | 0.00128748  | 744.733 | 152.4   | -4.8867  | 0.0128413   | 1342.03 | 512.9   | -2.61654 |
|         |             |         |         |          | 0.023012    | 766.2   | 292.867 | -2.61621 |
|         | 0.000273953 | 819.35  | 221.8   | -3.69409 | 0.00456057  | 1480.23 | 565.8   | -2.61616 |
|         |             |         |         |          | 0.00716199  | 1657.18 | 633.55  | -2.6157  |
|         |             |         |         |          | 0.00142268  | 4169.95 | 1594.43 | -2.61533 |
|         |             |         |         |          | 0.000519016 | 1438.63 | 550.35  | -2.61402 |
|         |             |         |         |          | 0.000416457 | 842.1   | 322.533 | -2.61089 |
|         |             |         |         |          | 0.00277249  | 1601.33 | 613.35  | -2.61079 |
|         |             |         |         |          | 0.0188644   | 692.625 | 265.35  | -2.61023 |
|         |             |         |         |          | 5.30398E-05 | 1782.3  | 683     | -2.60952 |
|         | 0.0027004   | 577.525 | 258.033 | -2.23818 | 0.000155851 | 941.85  | 361.367 | -2.60636 |
|         |             |         |         |          | 0.00284932  | 1207.13 | 463.3   | -2.60549 |
|         |             |         |         |          | 1.28459E-06 | 2678.9  | 1029.07 | -2.60323 |
|         |             |         |         |          | 0.000502949 | 1563.35 | 600.55  | -2.6032  |
|         |             |         |         |          | 3.50312E-06 | 2106.65 | 809.6   | -2.60209 |
| -2.6185 | 3.90344E-05 | 4289.58 | 1485.58 | -2.88748 | 3.83434E-05 | 2849    | 1097.28 | -2.59643 |
|         | 8.78957E-07 | 936.2   | 319     | -2.9348  | 9.55245E-05 | 1090.23 | 420.2   | -2.59456 |
| -2.6421 | 7.71006E-09 | 15106.3 | 2922.33 | -5.16928 | 1.23411E-05 | 5404.05 | 2083.53 | -2.59371 |
|         |             |         |         |          | 0.00380089  | 1472.27 | 567.7   | -2.59339 |
|         |             |         |         |          | 0.00087198  | 1522    | 586.925 | -2.59318 |
|         |             |         |         |          | 0.00179371  | 7501.18 | 2895.63 | -2.59052 |
|         |             |         |         |          | 5.01627E-05 | 1805.73 | 697.75  | -2.58793 |
|         |             |         |         |          | 0.00358053  | 1397    | 539.95  | -2.58728 |
|         | 0.000567148 | 1692.95 | 552.575 | -3.06375 | 0.00346392  | 2814.33 | 1088.35 | -2.58586 |
|         |             |         |         |          | 0.0150593   | 1194.73 | 462.033 | -2.5858  |
|         | 2.88298E-06 | 1128.05 | 434.133 | -2.5984  | 2.08332E-06 | 1832.98 | 709.15  | -2.58475 |
|         | 0.000132204 | 540.133 | 137.075 | -3.94042 | 0.000041193 | 998.7   | 386.4   | -2.58463 |
|         |             |         |         |          | 0.00368562  | 1162.3  | 449.75  | -2.58432 |
|         | 9.77338E-05 | 540.35  | 200.45  | -2.69568 | 0.000262392 | 1296.1  | 501.767 | -2.58307 |
|         |             |         |         |          | 0.00625599  | 1311.93 | 508.033 | -2.58236 |

|             |         |         |          |             |         |         |          |
|-------------|---------|---------|----------|-------------|---------|---------|----------|
|             |         |         |          | 0.00104303  | 1057.83 | 409.65  | -2.58227 |
|             |         |         |          | 3.22734E-06 | 1259.7  | 487.875 | -2.58201 |
|             |         |         |          | 3.78166E-05 | 1102.88 | 427.2   | -2.58164 |
|             |         |         |          | 0.00023169  | 2031.27 | 787.1   | -2.5807  |
|             |         |         |          | 7.09233E-05 | 1109.95 | 430.3   | -2.57948 |
|             |         |         |          | 0.0211399   | 1506.13 | 584     | -2.57898 |
|             |         |         |          | 0.008956    | 1445.13 | 560.5   | -2.57828 |
|             |         |         |          | 0.0136529   | 1272.33 | 493.6   | -2.57766 |
|             |         |         |          | 0.000184839 | 1633.73 | 634.8   | -2.57361 |
| 0.01288     | 781.233 | 319.767 | -2.44314 | 0.000236938 | 1661.2  | 645.7   | -2.57271 |
|             |         |         |          | 2.9508E-09  | 13379.3 | 5202.57 | -2.57166 |
|             |         |         |          | 5.12103E-05 | 1445.83 | 562.425 | -2.5707  |
|             |         |         |          | 8.57965E-05 | 712.45  | 277.15  | -2.57063 |
|             |         |         |          | 0.00112153  | 827.1   | 322.033 | -2.56837 |
|             |         |         |          | 0.0188027   | 736.267 | 286.7   | -2.56807 |
| 2.22208E-05 | 1565.53 | 500.5   | -3.12792 | 2.22568E-05 | 2924.85 | 1139.05 | -2.5678  |
|             |         |         |          | 0.00595391  | 9723.25 | 3786.78 | -2.56769 |
| 2.47692E-06 | 756.475 | 300.15  | -2.52032 | 0.000162919 | 1516.45 | 590.625 | -2.56753 |
|             |         |         |          | 3.92284E-05 | 2917.78 | 1136.8  | -2.56666 |
| 0.00579583  | 543.25  | 253.2   | -2.14554 | 0.000190113 | 972.275 | 378.967 | -2.5656  |
|             |         |         |          | 0.00106347  | 1585.03 | 617.967 | -2.56492 |
| 5.37099E-05 | 645.267 | 173.5   | -3.71912 | 0.000146839 | 1155.03 | 450.35  | -2.56473 |
|             |         |         |          | 8.19576E-06 | 2827.35 | 1102.4  | -2.56472 |
|             |         |         |          | 4.89172E-05 | 1276.2  | 497.7   | -2.5642  |
|             |         |         |          | 0.0140439   | 942.3   | 368.433 | -2.55759 |
|             |         |         |          | 0.00413566  | 2121.85 | 829.7   | -2.55737 |
|             |         |         |          | 0.00597836  | 916.9   | 358.7   | -2.55618 |
|             |         |         |          | 6.23545E-06 | 2173.55 | 850.975 | -2.55419 |
|             |         |         |          | 5.20617E-05 | 2037.65 | 797.775 | -2.55417 |
|             |         |         |          | 8.49984E-05 | 1030.53 | 403.8   | -2.55209 |
|             |         |         |          | 0.00347656  | 1134.6  | 444.6   | -2.55196 |
| 3.18404E-10 | 2029.15 | 563.8   | -3.59906 | 4.09079E-07 | 2853.7  | 1118.78 | -2.55074 |
| 0.000808156 | 881.7   | 432.925 | -2.03661 | 0.000037467 | 1714.68 | 672.35  | -2.55027 |
|             |         |         |          | 0.000220722 | 866.6   | 340     | -2.54882 |
|             |         |         |          | 0.000767291 | 1146.3  | 449.8   | -2.54847 |
|             |         |         |          | 3.13098E-05 | 9115.88 | 3583.6  | -2.54378 |
|             |         |         |          | 0.0059779   | 1181.58 | 464.95  | -2.54129 |
|             |         |         |          | 0.000394804 | 3041.9  | 1198.2  | -2.53872 |
| 0.000580549 | 824.175 | 356.4   | -2.3125  | 2.93269E-05 | 1539.35 | 606.65  | -2.53746 |
|             |         |         |          | 0.0182714   | 1129.43 | 445.9   | -2.53291 |
|             |         |         |          | 0.0124591   | 932.1   | 368.05  | -2.53254 |
|             |         |         |          | 0.00028565  | 909.425 | 359.133 | -2.53228 |
|             |         |         |          | 0.0114377   | 767.633 | 303.3   | -2.53094 |
| 0.000425764 | 1522.55 | 751.433 | -2.02619 | 0.000187884 | 3448.55 | 1362.63 | -2.53081 |
|             |         |         |          | 0.00930818  | 1408.3  | 556.55  | -2.53041 |
| 5.57317E-05 | 1195.63 | 518.6   | -2.30549 | 3.11554E-06 | 2011.18 | 794.867 | -2.5302  |
| 3.91183E-05 | 1002.73 | #DIV/0! | #DIV/0!  | 0.001017    | 2021.2  | 798.867 | -2.53008 |
|             |         |         |          | 1.70557E-05 | 1819.53 | 719.825 | -2.52773 |
| 0.00010803  | 589.6   | 269.9   | -2.18451 | 2.53703E-06 | 1395.3  | 552.1   | -2.52726 |
|             |         |         |          | 0.00388012  | 1046.93 | 414.933 | -2.52312 |
|             |         |         |          | 0.0108431   | 777.767 | 308.4   | -2.52194 |
| 0.0115145   | 1132.55 | 429.267 | -2.63834 | 0.00968251  | 1386.03 | 549.75  | -2.52121 |
|             |         |         |          | 0.0200057   | 1235.17 | 490.85  | -2.51638 |
| 8.65254E-05 | 846.75  | 311.133 | -2.7215  | 1.57827E-05 | 1633.65 | 649.55  | -2.51505 |
| 0.0119495   | 695.533 | 239.4   | -2.90532 | 0.000878187 | 1475.47 | 586.95  | -2.51379 |
|             |         |         |          | 0.0121397   | 746.133 | 296.833 | -2.51364 |
| 2.14518E-07 | 1101.08 | 367.9   | -2.99286 | 0.000139212 | 1609.65 | 640.55  | -2.51292 |
|             |         |         |          | 0.000436681 | 1793.57 | 713.9   | -2.51235 |
| 0.000092104 | 3312.05 | #DIV/0! | #DIV/0!  | 8.27854E-05 | 7089.03 | 2822.03 | -2.51203 |
|             |         |         |          | 0.00173959  | 1271.98 | 506.475 | -2.51143 |
|             |         |         |          | 2.91347E-06 | 1765.37 | 703.033 | -2.51107 |
|             |         |         |          | 0.00109023  | 1027    | 409     | -2.511   |
|             |         |         |          | 0.00719956  | 1999.55 | 796.325 | -2.51097 |



|         |             |         |         |          |             |         |         |          |
|---------|-------------|---------|---------|----------|-------------|---------|---------|----------|
|         |             |         |         |          | 0.0225109   | 605.075 | 241.1   | -2.50964 |
|         | 9.66571E-05 | 1068.05 | 451.767 | -2.36416 | 4.62603E-06 | 1913.28 | 762.467 | -2.50932 |
|         |             |         |         |          | 0.000824931 | 1465.83 | 584.8   | -2.50655 |
|         |             |         |         |          | 0.00290233  | 875     | 349.2   | -2.50573 |
|         |             |         |         |          | 2.46347E-07 | 10362.8 | 4137.73 | -2.50446 |
|         |             |         |         |          | 0.00191616  | 1035.95 | 413.833 | -2.5033  |
|         |             |         |         |          | 0.00847594  | 831.15  | 332.033 | -2.50321 |
|         | 0.00133675  | 7263.45 | 3574.08 | -2.03226 | 0.000150903 | 19584.3 | 7825.13 | -2.50275 |
|         |             |         |         |          | 0.000175782 | 2864.57 | 1145.1  | -2.50159 |
|         |             |         |         |          | 1.77864E-05 | 1896.5  | 758.233 | -2.50121 |
|         |             |         |         |          | 4.01257E-07 | 2233.53 | 894.2   | -2.49779 |
| -3.3682 | 2.56475E-05 | 976.75  | 312.667 | -3.12393 | 8.69682E-06 | 1021.2  | 409     | -2.49682 |
|         |             |         |         |          | 0.0116049   | 1006.98 | 403.767 | -2.49395 |
|         |             |         |         |          | 0.0022415   | 1410.13 | 566.1   | -2.49096 |
|         |             |         |         |          | 0.00334732  | 1579.45 | 634.075 | -2.49095 |
|         | 3.65359E-05 | 590.85  | 187.35  | -3.15372 | 0.00180557  | 1067.2  | 428.625 | -2.48982 |
|         |             |         |         |          | 4.82284E-06 | 1356.1  | 545.125 | -2.48769 |
|         | 0.000121015 | 2674.9  | 910.5   | -2.93784 | 8.99438E-05 | 2706.28 | 1088.75 | -2.48567 |
|         |             |         |         |          | 0.000333884 | 1010.28 | 406.6   | -2.48469 |
|         |             |         |         |          | 0.000107159 | 3850.6  | 1549.93 | -2.48438 |
|         |             |         |         |          | 0.00106346  | 2027.8  | 816.5   | -2.48353 |
|         |             |         |         |          | 0.0018872   | 2035    | 819.8   | -2.48231 |
|         |             |         |         |          | 0.00165335  | 1060    | 427.15  | -2.48156 |
| 4.20617 |             |         |         |          | 0.00575056  | 2258.25 | 910.475 | -2.4803  |
|         | 9.28956E-05 | 1301.43 | 545.133 | -2.38737 | 0.000652921 | 1488.03 | 600.1   | -2.47964 |
| -2.4574 | 0.000106505 | 1540.1  | 507.75  | -3.03319 | 0.000231206 | 1743.65 | 703.35  | -2.47906 |
|         |             |         |         |          | 0.000146928 | 999.7   | 403.7   | -2.47634 |
|         |             |         |         |          | 0.00702727  | 1173.77 | 474.1   | -2.47578 |
|         | 0.000051197 | 814.3   | 404.45  | -2.01335 | 0.000120579 | 1697.88 | 686.8   | -2.47215 |
|         |             |         |         |          | 0.000159232 | 1497.9  | 607.15  | -2.4671  |
|         |             |         |         |          | 0.000509497 | 4287.77 | 1738.5  | -2.46636 |
|         | 0.000441    | 1387.15 | 489.8   | -2.83207 | 0.00106383  | 2145.6  | 869.975 | -2.46628 |
| -3.0396 | 1.83455E-05 | 786.95  | 218.467 | -3.60215 | 0.00102545  | 931.475 | 377.825 | -2.46536 |
|         |             |         |         |          | 1.00308E-05 | 1614.45 | 655.425 | -2.46321 |
|         |             |         |         |          | 0.0207317   | 713.167 | 289.6   | -2.46259 |
|         |             |         |         |          | 0.000788715 | 1963.45 | 797.55  | -2.46185 |
|         | 0.0031998   | 1166.25 | 338.4   | -3.44637 | 0.00695133  | 2055.03 | 835.275 | -2.4603  |
|         |             |         |         |          | 0.000111164 | 1518.85 | 617.55  | -2.45948 |
|         |             |         |         |          | 0.0010585   | 1735.25 | 705.875 | -2.4583  |
|         | 0.0121979   | 667.7   | 298.4   | -2.2376  | 0.000336399 | 1151.9  | 469     | -2.45608 |
|         | 1.37626E-05 | 908.825 | 355.7   | -2.55503 | 6.92815E-05 | 1671.4  | 680.933 | -2.45457 |
|         |             |         |         |          | 1.29503E-06 | 1691.2  | 689.075 | -2.4543  |
|         |             |         |         |          | 0.00107664  | 1972.27 | 804.1   | -2.45276 |
|         |             |         |         |          | 0.0133577   | 921.667 | 376.2   | -2.44994 |
|         |             |         |         |          | 0.0171833   | 1288.03 | 525.9   | -2.4492  |
|         |             |         |         |          | 0.0003789   | 1617    | 660.35  | -2.4487  |
|         | 5.87137E-06 | 770.45  | 171.9   | -4.48197 | 8.48424E-05 | 1215.05 | 496.35  | -2.44797 |
|         | 0.0107904   | 845.333 | 120.3   | -7.02688 | 0.00174544  | 1399.4  | 571.9   | -2.44693 |
|         | 0.013131    | 962.975 | 450.275 | -2.13864 | 0.00537516  | 1880.47 | 768.9   | -2.44566 |
|         | 0.00319374  | 672.475 | 243     | -2.76739 | 0.00420175  | 1481.73 | 605.9   | -2.44549 |
|         | 0.000423561 | 2471.23 | 1205.65 | -2.0497  | 1.88655E-05 | 4587.95 | 1876.48 | -2.44498 |
|         |             |         |         |          | 0.000692375 | 1123.5  | 459.533 | -2.44487 |
|         | 0.000146846 | 1097.13 | 491.867 | -2.23053 | 0.000014466 | 1257.4  | 514.4   | -2.4444  |
|         | 0.00092041  | 524.275 | 205.367 | -2.55287 | 0.00057616  | 999.6   | 409.1   | -2.44341 |
|         |             |         |         |          | 0.000697901 | 1191.7  | 487.775 | -2.44313 |
|         | 0.000166088 | 687.833 | 217.25  | -3.16609 | 0.000736138 | 933.425 | 382.2   | -2.44224 |
|         |             |         |         |          | 0.00947198  | 1097.23 | 449.3   | -2.44208 |
|         | 4.79805E-08 | 1882.3  | 746.6   | -2.52116 | 5.75222E-08 | 2638.23 | 1081.63 | -2.43913 |
|         |             |         |         |          | 0.00040692  | 1182.78 | 485     | -2.43871 |
|         |             |         |         |          | 0.00029782  | 1258.93 | 516.8   | -2.43602 |
|         | 0.000412318 | 1038.18 | 505.875 | -2.05224 | 0.000120285 | 1382.63 | 567.9   | -2.43464 |
|         |             |         |         |          | 0.022549    | 1214.67 | 499.1   | -2.43371 |
|         |             |         |         |          | 0.0014676   | 1377.13 | 566.25  | -2.43201 |

|         |             |         |         |          |             |         |         |          |
|---------|-------------|---------|---------|----------|-------------|---------|---------|----------|
|         | 0.0131307   | 707.2   | 335.075 | -2.11057 | 0.000768123 | 2092.15 | 861.125 | -2.42955 |
|         |             |         |         |          | 0.00183344  | 1615.17 | 665.7   | -2.42627 |
|         |             |         |         |          | 0.00304684  | 1211.93 | 499.8   | -2.42484 |
|         | 0.00113896  | 680.775 | 241.4   | -2.82011 | 0.00282927  | 1070.75 | 441.6   | -2.42471 |
|         |             |         |         |          | 0.00127729  | 2134.95 | 881.033 | -2.42323 |
|         | 0.00526736  | 651.65  | 201.1   | -3.24043 | 0.00156579  | 979.025 | 404.367 | -2.42113 |
|         |             |         |         |          | 0.000488014 | 4073.43 | 1682.95 | -2.42041 |
|         |             |         |         |          | 0.0161852   | 1279.83 | 528.85  | -2.42002 |
|         | 4.62152E-05 | 644.775 | 313.375 | -2.05752 | 1.90066E-05 | 1000.45 | 413.45  | -2.41976 |
|         |             |         |         |          | 0.0048774   | 2311.17 | 956.2   | -2.41703 |
|         | 0.000127793 | 1959.45 | 550.467 | -3.55962 | 0.00704726  | 2691.75 | 1113.68 | -2.417   |
|         |             |         |         |          | 0.000231698 | 1541.4  | 637.9   | -2.41637 |
|         |             |         |         |          | 0.00175182  | 1528.45 | 633.05  | -2.41442 |
|         |             |         |         |          | 1.35368E-08 | 1396.03 | 578.475 | -2.41328 |
|         |             |         |         |          | 5.51057E-05 | 1798.13 | 745.5   | -2.41197 |
|         | 0.000508055 | 962.2   | 422.675 | -2.27645 | 0.000279234 | 2033.78 | 843.575 | -2.4109  |
|         |             |         |         |          | 0.00612486  | 1261.4  | 523.775 | -2.40829 |
|         |             |         |         |          | 0.00412833  | 502.7   | 208.8   | -2.40757 |
|         | 2.03976E-05 | 648.65  | 252.233 | -2.57163 | 0.000377442 | 956.925 | 397.6   | -2.40675 |
|         |             |         |         |          | 0.00708671  | 1299.15 | 539.8   | -2.40672 |
|         |             |         |         |          | 0.00991132  | 706.55  | 293.6   | -2.40651 |
|         |             |         |         |          | 0.0078273   | 961.45  | 399.95  | -2.40393 |
|         | 2.81709E-05 | 5993.5  | 2837.2  | -2.11247 | 4.48833E-06 | 12777.4 | 5316.95 | -2.40314 |
|         | 6.40177E-06 | 810.45  | 259.233 | -3.12633 | 8.47141E-05 | 1381.65 | 575.267 | -2.40176 |
|         | 0.00063788  | 2765.15 | 913.325 | -3.02756 | 0.00456975  | 1730.58 | 720.725 | -2.40116 |
|         |             |         |         |          | 0.00994371  | 1171.85 | 488.325 | -2.39973 |
|         |             |         |         |          | 0.00796724  | 1978.2  | 824.7   | -2.39869 |
|         |             |         |         |          | 0.000019071 | 1567.17 | 653.7   | -2.39738 |
|         | 0.000207077 | 4298.38 | 2101.2  | -2.04568 | 4.13575E-05 | 8657.03 | 3621.68 | -2.39034 |
|         | 2.22827E-05 | 1031.4  | 391.95  | -2.63146 | 0.000117527 | 1846.53 | 772.5   | -2.39032 |
|         |             |         |         |          | 0.00157512  | 915.467 | 383     | -2.39025 |
|         |             |         |         |          | 0.000855211 | 1513.87 | 633.567 | -2.38944 |
|         |             |         |         |          | 0.000965682 | 1230.05 | 514.95  | -2.38868 |
|         | 0.00848109  | 608.2   | 286.4   | -2.1236  | 0.000961691 | 1587.43 | 664.6   | -2.38855 |
|         |             |         |         |          | 0.000182358 | 1400    | 586.15  | -2.38847 |
|         |             |         |         |          | 0.0200827   | 1677.2  | 702.55  | -2.3873  |
|         |             |         |         |          | 0.00484435  | 1018.45 | 426.975 | -2.38527 |
|         | 5.76223E-07 | 1011    | 284.2   | -3.55735 | 0.000616846 | 1826.3  | 766.175 | -2.38366 |
|         |             |         |         |          | 1.05709E-06 | 2301.15 | 965.6   | -2.38313 |
|         |             |         |         |          | 6.193E-07   | 3477.53 | 1460.63 | -2.38085 |
|         | 0.00289486  | 907.825 | 341.267 | -2.66016 | 0.000110401 | 2583.35 | 1085.4  | -2.38009 |
|         | 0.00698115  | 2005.15 | 677.675 | -2.95887 | 0.00840709  | 1870.53 | 786.025 | -2.37973 |
|         |             |         |         |          | 0.0179672   | 3552.03 | 1492.88 | -2.37932 |
|         |             |         |         |          | 0.00589613  | 1476.68 | 621.267 | -2.37688 |
|         |             |         |         |          | 0.000241756 | 1304.9  | 549.1   | -2.37643 |
| -2.3437 | 6.41499E-05 | 727.95  | 317.85  | -2.29023 | 1.72039E-05 | 917.225 | 386.1   | -2.37562 |
|         | 0.0106653   | 1209.7  | #DIV/0! | #DIV/0!  | 0.00224951  | 2159.15 | 909.4   | -2.37426 |
|         | 3.27664E-08 | 818.9   | 240.6   | -3.40357 | 0.000235699 | 1028.73 | 434.35  | -2.36842 |
|         |             |         |         |          | 0.000280667 | 1269.58 | 536.275 | -2.3674  |
|         |             |         |         |          | 0.000599604 | 1198.43 | 506.55  | -2.36587 |
|         |             |         |         |          | 2.35555E-05 | 1690.95 | 715.25  | -2.36414 |
|         |             |         |         |          | 0.00182202  | 739.95  | 313.333 | -2.36154 |
|         |             |         |         |          | 0.00189431  | 1637.88 | 694.025 | -2.35997 |
|         |             |         |         |          | 0.000745948 | 919.067 | 389.7   | -2.3584  |
|         |             |         |         |          | 0.00684435  | 1864.55 | 790.675 | -2.35817 |
|         | 0.00398216  | 754.433 | #DIV/0! | #DIV/0!  | 0.0150123   | 1291.93 | 547.875 | -2.35807 |
|         |             |         |         |          | 1.61318E-07 | 1502.87 | 637.775 | -2.35642 |
|         |             |         |         |          | 0.00169152  | 1201.73 | 510     | -2.35634 |
|         |             |         |         |          | 0.0124813   | 2381.73 | 1011.28 | -2.35517 |
|         | 0.00027381  | 652.033 | 188.4   | -3.4609  | 0.0118758   | 1100.43 | 467.333 | -2.35469 |
|         | 8.27103E-07 | 916.325 | 406.233 | -2.25566 | 2.72564E-08 | 1181    | 501.6   | -2.35447 |
|         |             |         |         |          | 0.000210934 | 1064.78 | 452.425 | -2.35348 |
|         | 0.00839804  | 652.867 | #DIV/0! | #DIV/0!  | 0.00188221  | 1229.43 | 522.75  | -2.35184 |

|         |             |         |         |          |             |         |         |          |
|---------|-------------|---------|---------|----------|-------------|---------|---------|----------|
| -2.3108 | 1.44249E-08 | 4193.78 | 992.55  | -4.22525 | 1.81159E-05 | 2484.43 | 1056.43 | -2.35173 |
|         |             |         |         |          | 0.00272546  | 1223.5  | 520.567 | -2.35032 |
|         |             |         |         |          | 5.83643E-05 | 1631.7  | 694.767 | -2.34856 |
|         | 7.84721E-05 | 903.9   | 236.75  | -3.81795 | 0.0225218   | 1206.38 | 513.9   | -2.34749 |
|         | 0.000147407 | 737.6   | 229.833 | -3.20928 | 0.000513954 | 1389.53 | 592.1   | -2.34679 |
|         |             |         |         |          | 0.00481889  | 1253.75 | 534.325 | -2.34642 |
|         |             |         |         |          | 0.000212632 | 3481.05 | 1484.05 | -2.34564 |
|         |             |         |         |          | 0.00630208  | 1131.73 | 482.7   | -2.34459 |
|         |             |         |         |          | 0.000108424 | 1855.97 | 793.767 | -2.33818 |
|         |             |         |         |          | 0.00031603  | 1680.53 | 719.025 | -2.33723 |
|         |             |         |         |          | 0.0032547   | 2309.78 | 988.567 | -2.33649 |
|         | 1.65007E-05 | 17512.2 | 7767.83 | -2.25446 | 3.86178E-06 | 36336.9 | 15555.4 | -2.33597 |
|         | 0.000241583 | 2320.95 | 936.6   | -2.47806 | 2.93952E-05 | 3152.43 | 1349.73 | -2.33561 |
|         |             |         |         |          | 2.58906E-08 | 1786.18 | 764.9   | -2.33517 |
|         | 0.000198379 | 728.7   | 255.8   | -2.84871 | 8.92661E-05 | 1072.93 | 459.5   | -2.33498 |
|         | 3.23449E-06 | 2674.2  | 1243.85 | -2.14994 | 1.6915E-06  | 5089.93 | 2180.4  | -2.3344  |
|         | 8.17414E-05 | 2144.25 | 694.533 | -3.08732 | 0.000444799 | 3604.3  | 1544    | -2.33439 |
|         |             |         |         |          | 0.000987278 | 1983    | 849.667 | -2.33386 |
|         |             |         |         |          | 0.00973111  | 778.85  | 333.867 | -2.33282 |
| -2.3564 | 1.21713E-08 | 2219.08 | 904.05  | -2.45459 | 4.55139E-08 | 2210.53 | 949.125 | -2.32901 |
|         | 1.60238E-06 | 721.5   | 185.55  | -3.88844 | 0.000387041 | 1352.83 | 581.267 | -2.32737 |
|         |             |         |         |          | 0.00700735  | 846.875 | 363.9   | -2.32722 |
|         |             |         |         |          | 0.00024875  | 1459.33 | 627.733 | -2.32477 |
|         |             |         |         |          | 3.89507E-05 | 1325.88 | 570.367 | -2.3246  |
|         |             |         |         |          | 0.00124126  | 806.15  | 347.3   | -2.32119 |
|         |             |         |         |          | 1.63113E-06 | 1770.83 | 763.5   | -2.31936 |
|         |             |         |         |          | 0.000565809 | 1771.45 | 764.433 | -2.31734 |
|         |             |         |         |          | 0.00137606  | 3319.33 | 1432.8  | -2.31667 |
|         | 0.000110634 | 795.525 | 284.2   | -2.79917 | 3.57147E-05 | 1430.03 | 617.3   | -2.31658 |
|         |             |         |         |          | 4.40362E-05 | 3996.5  | 1725.4  | -2.31627 |
|         | 0.000469327 | 721.633 | 298     | -2.42159 | 0.00151206  | 1723.5  | 746.1   | -2.31001 |
|         |             |         |         |          | 0.0119328   | 2228.47 | 964.767 | -2.30985 |
|         |             |         |         |          | 0.000503762 | 788.3   | 341.35  | -2.30936 |
|         | 0.000482405 | 1204.08 | 576.7   | -2.08787 | 0.000021179 | 1873.03 | 811.675 | -2.3076  |
|         |             |         |         |          | 4.58365E-05 | 1240.23 | 537.6   | -2.30697 |
|         |             |         |         |          | 0.000570369 | 1669.47 | 723.833 | -2.30642 |
|         | 6.29753E-05 | 3086.63 | 1266.73 | -2.4367  | 3.16233E-05 | 5446.78 | 2362.1  | -2.3059  |
|         | 0.000028287 | 3309.98 | 1338.68 | -2.47258 | 7.95616E-05 | 5349.28 | 2320.1  | -2.30562 |
|         |             |         |         |          | 0.00389199  | 1496.83 | 649.7   | -2.30387 |
|         |             |         |         |          | 0.0155222   | 2977.88 | 1294.47 | -2.30046 |
|         |             |         |         |          | 0.000785081 | 1100.73 | 478.6   | -2.2999  |
|         | 1.80379E-05 | 919     | 393.9   | -2.33308 | 0.000238204 | 1801.17 | 783.475 | -2.29895 |
|         |             |         |         |          | 6.6136E-07  | 30858.8 | 13431   | -2.29758 |
|         |             |         |         |          | 3.93731E-05 | 1105.28 | 481.175 | -2.29703 |
|         |             |         |         |          | 0.0119839   | 618.567 | 269.4   | -2.29609 |
|         |             |         |         |          | 0.00102089  | 704.333 | 307.2   | -2.29275 |
|         |             |         |         |          | 2.07125E-11 | 263348  | 115143  | -2.28713 |
|         |             |         |         |          | 6.23151E-07 | 1856.17 | 811.667 | -2.28686 |
|         |             |         |         |          | 0.000894181 | 1836.13 | 803.65  | -2.28473 |
|         |             |         |         |          | 0.00127888  | 4560.78 | 1996.5  | -2.28439 |
|         |             |         |         |          | 0.00118236  | 1742.43 | 762.9   | -2.28395 |
|         |             |         |         |          | 0.000536618 | 956.525 | 418.967 | -2.28306 |
|         |             |         |         |          | 0.0205376   | 1394.9  | 611.2   | -2.28223 |
| -3.7019 | 2.22387E-08 | 2043.65 | 465.575 | -4.38952 | 4.30259E-05 | 1652.63 | 724.467 | -2.28116 |
|         | 0.000117156 | 1448.9  | 654.45  | -2.21392 | 0.00013524  | 2076.43 | 910.6   | -2.28028 |
|         |             |         |         |          | 0.000113665 | 3471.8  | 1523.58 | -2.27872 |
|         |             |         |         |          | 0.00586666  | 2535.25 | 1113.3  | -2.27724 |
|         | 0.00216519  | 2007.33 | 827.8   | -2.42489 | 0.0019659   | 3140.38 | 1379.1  | -2.27712 |
|         |             |         |         |          | 1.43176E-05 | 2269.85 | 997.3   | -2.276   |
|         |             |         |         |          | 0.000286005 | 2188.97 | 962.167 | -2.27504 |
|         | 2.65362E-06 | 7248    | 3271.5  | -2.2155  | 3.93435E-06 | 5167.6  | 2274.9  | -2.27157 |
|         |             |         |         |          | 0.0120025   | 1356.73 | 597.9   | -2.26915 |
|         | 0.000276443 | 1739.58 | #DIV/0! | #DIV/0!  | 2.63988E-06 | 3673.93 | 1620    | -2.26785 |

|         |             |         |         |          |             |         |         |          |
|---------|-------------|---------|---------|----------|-------------|---------|---------|----------|
| -2.5527 | 7.83877E-09 | 7095.8  | 1716.7  | -4.1334  | 2.89631E-05 | 3763.75 | 1659.78 | -2.26763 |
|         |             |         |         |          | 0.0142927   | 1573    | 693.9   | -2.2669  |
|         |             |         |         |          | 0.0186789   | 1766.33 | 779.2   | -2.26684 |
|         |             |         |         |          | 0.020114    | 821.367 | 362.767 | -2.26417 |
|         |             |         |         |          | 0.0136602   | 1779.68 | 786.233 | -2.26355 |
|         |             |         |         |          | 3.03909E-06 | 1798.65 | 794.725 | -2.26324 |
|         |             |         |         |          | 4.93366E-06 | 1435.03 | 634.3   | -2.26238 |
|         |             |         |         |          | 0.00470582  | 1625.35 | 718.6   | -2.26183 |
|         |             |         |         |          | 0.000211706 | 1035.93 | 458.2   | -2.26086 |
|         |             |         |         |          | 0.000129693 | 2308.28 | 1021.3  | -2.26013 |
|         | 3.97412E-06 | 1299.8  | 533     | -2.43865 | 1.33289E-06 | 1694.88 | 749.95  | -2.25998 |
| -3.3968 | 0.00041298  | 1722.1  | 623.825 | -2.76055 | 0.00228107  | 977.825 | 433.133 | -2.25756 |
|         |             |         |         |          | 0.0141017   | 766.4   | 339.567 | -2.25699 |
|         |             |         |         |          | 0.00157586  | 904.833 | 400.925 | -2.25686 |
|         | 0.0030563   | 618.325 | 175.6   | -3.52121 | 0.0158005   | 1096.95 | 486.1   | -2.25663 |
|         | 5.12097E-10 | 638.4   | 215.1   | -2.96792 | 1.82342E-06 | 1087.55 | 482.275 | -2.25504 |
|         |             |         |         |          | 0.000186542 | 1438.73 | 638.15  | -2.25452 |
|         |             |         |         |          | 0.00172706  | 1145.58 | 508.2   | -2.25418 |
|         |             |         |         |          | 0.00370568  | 4978.18 | 2210.13 | -2.25244 |
|         |             |         |         |          | 0.00124535  | 1224.73 | 544.25  | -2.25031 |
|         |             |         |         |          | 0.00930853  | 1756.17 | 781.175 | -2.24811 |
|         |             |         |         |          | 0.000131128 | 1944    | 865.133 | -2.24705 |
|         |             |         |         |          | 0.000072352 | 2070.78 | 922.05  | -2.24584 |
|         | 1.05023E-05 | 1284.13 | 566.3   | -2.26757 | 3.71362E-05 | 1738.63 | 775.025 | -2.24331 |
| -3.273  | 0.000287296 | 2717.18 | 1114.25 | -2.43857 | 0.00517322  | 1397.43 | 623.467 | -2.24139 |
|         |             |         |         |          | 0.00183575  | 1297.4  | 579.925 | -2.23719 |
|         | 1.92533E-06 | 988.25  | 357.75  | -2.7624  | 0.000082631 | 1293.95 | 578.525 | -2.23664 |
|         |             |         |         |          | 4.22666E-05 | 936.275 | 418.667 | -2.23633 |
|         |             |         |         |          | 0.000768503 | 2430.5  | 1087.33 | -2.2353  |
|         |             |         |         |          | 0.00149111  | 939.067 | 420.9   | -2.23109 |
|         |             |         |         |          | 0.0114634   | 913.825 | 409.7   | -2.23047 |
|         |             |         |         |          | 0.00431385  | 3645.6  | 1634.65 | -2.2302  |
| -2.1716 | 5.1194E-09  | 1537.2  | 399.9   | -3.84396 | 7.36333E-05 | 1638.33 | 734.933 | -2.22923 |
|         |             |         |         |          | 0.00080267  | 1496.1  | 671.8   | -2.227   |
|         |             |         |         |          | 0.0067237   | 1383.4  | 621.2   | -2.22698 |
|         |             |         |         |          | 5.05239E-05 | 1959.8  | 880.75  | -2.22515 |
|         |             |         |         |          | 0.0113929   | 2570.33 | 1159.1  | -2.21753 |
|         |             |         |         |          | 1.99648E-05 | 1492.8  | 673.433 | -2.2167  |
|         | 0.000475803 | 775.325 | 288.5   | -2.68744 | 0.000146378 | 1598.58 | 721.55  | -2.21547 |
|         |             |         |         |          | 0.00004967  | 2168.45 | 979.2   | -2.21451 |
|         |             |         |         |          | 0.000986778 | 1023.25 | 463.425 | -2.20802 |
|         |             |         |         |          | 4.8296E-06  | 1519.78 | 688.4   | -2.20769 |
|         |             |         |         |          | 0.0219373   | 1178.25 | 533.85  | -2.20708 |
|         |             |         |         |          | 0.00604405  | 819.45  | 371.7   | -2.2046  |
|         | 1.87694E-06 | 10745.5 | 4243.73 | -2.5321  | 1.54564E-05 | 17817.6 | 8093.93 | -2.20135 |
|         |             |         |         |          | 0.000779759 | 2085.35 | 948.2   | -2.19927 |
|         |             |         |         |          | 0.00670036  | 1147.53 | 522.075 | -2.19801 |
|         |             |         |         |          | 0.0178246   | 847.025 | 385.6   | -2.19664 |
|         | 9.34479E-06 | 516.8   | 204.375 | -2.52869 | 0.000663151 | 934.1   | 425.55  | -2.19504 |
|         | 3.03688E-05 | 2130.93 | 915.975 | -2.3264  | 6.04149E-06 | 2205.98 | 1005.23 | -2.19451 |
|         |             |         |         |          | 0.00248437  | 1457.28 | 665.025 | -2.19131 |
|         | 0.00303466  | 709.825 | 326     | -2.17738 | 3.97519E-05 | 1669    | 763.55  | -2.18584 |
|         |             |         |         |          | 0.000483521 | 764.867 | 350.5   | -2.18222 |
| -2.3601 | 8.37926E-06 | 1455.48 | 577.1   | -2.52205 | 5.12966E-05 | 1694.2  | 776.375 | -2.18219 |
| -2.4325 | 1.16481E-09 | 2678.38 | 776.225 | -3.45051 | 2.5746E-06  | 3434.95 | 1575    | -2.18092 |
| -2.1955 | 1.32802E-06 | 2806.7  | 911.95  | -3.07769 | 0.00131456  | 1727    | 791.875 | -2.1809  |
|         |             |         |         |          | 0.000072    | 934.667 | 428.75  | -2.17998 |
|         |             |         |         |          | 0.00216175  | 1631.53 | 748.433 | -2.17992 |
|         |             |         |         |          | 5.40227E-06 | 3073.93 | 1410.67 | -2.17906 |
|         | 6.09871E-06 | 1487.7  | 589.833 | -2.52224 | 5.11336E-07 | 2886.18 | 1324.85 | -2.17849 |
|         | 4.73759E-05 | 872.525 | 282.2   | -3.09187 | 0.000138789 | 1249.4  | 573.8   | -2.17741 |
|         |             |         |         |          | 4.11148E-05 | 1370.38 | 629.5   | -2.17693 |
|         |             |         |         |          | 0.00529788  | 708.575 | 325.6   | -2.17621 |

|             |         |         |          |             |         |         |          |
|-------------|---------|---------|----------|-------------|---------|---------|----------|
| 3.47573E-09 | 1342.33 | 412.35  | -3.2553  | 3.16437E-06 | 1438.53 | 661.175 | -2.17571 |
|             |         |         |          | 0.0023353   | 1073.7  | 493.967 | -2.17363 |
|             |         |         |          | 0.00386699  | 933.825 | 430.15  | -2.17093 |
|             |         |         |          | 9.08044E-06 | 1813.58 | 835.45  | -2.17078 |
|             |         |         |          | 3.95378E-05 | 1114.53 | 513.525 | -2.17034 |
|             |         |         |          | 0.00630405  | 1620.27 | 746.8   | -2.16961 |
| 0.00292419  | 733.033 | 362.2   | -2.02384 | 0.000260725 | 1305.5  | 602.267 | -2.16764 |
| 7.34095E-07 | 548.4   | #DIV/0! | #DIV/0!  | 0.000331146 | 915.933 | 422.55  | -2.16763 |
|             |         |         |          | 0.000917655 | 1113.23 | 513.633 | -2.16735 |
| 3.14717E-05 | 1030.18 | 458.15  | -2.24855 | 3.19802E-05 | 1250.23 | 577     | -2.16677 |
|             |         |         |          | 0.00837875  | 724.267 | 334.7   | -2.16393 |
|             |         |         |          | 0.000217967 | 1237.15 | 572.125 | -2.16238 |
| 0.00165569  | 1932.03 | 800.4   | -2.41382 | 0.0020442   | 3523.15 | 1629.55 | -2.16204 |
|             |         |         |          | 0.00155453  | 2158.5  | 998.675 | -2.16136 |
| 9.51457E-05 | 925.5   | 432.825 | -2.13828 | 0.00172068  | 1320.45 | 611.967 | -2.15772 |
|             |         |         |          | 0.00110074  | 2629.6  | 1219.5  | -2.15629 |
|             |         |         |          | 0.00217388  | 5059.58 | 2346.83 | -2.15592 |
|             |         |         |          | 0.0216566   | 1061    | 492.775 | -2.15311 |
| 1.56029E-07 | 1848.27 | 609.15  | -3.03417 | 5.50205E-06 | 2505.3  | 1164.63 | -2.15116 |
|             |         |         |          | 0.00512256  | 1853.77 | 862.267 | -2.14988 |
|             |         |         |          | 8.32191E-05 | 1257.63 | 585.533 | -2.14783 |
|             |         |         |          | 5.80217E-05 | 1291.83 | 602.133 | -2.14541 |
|             |         |         |          | 0.0132872   | 767.367 | 357.9   | -2.14408 |
| 0.000708833 | 805.5   | #DIV/0! | #DIV/0!  | 0.000912267 | 1472.47 | 687.4   | -2.14208 |
|             |         |         |          | 0.0100902   | 1254.8  | 586.3   | -2.1402  |
| 4.11307E-05 | 798.25  | 309.833 | -2.57639 | 0.000261054 | 1753.45 | 819.45  | -2.13979 |
|             |         |         |          | 0.000513674 | 1118.65 | 523.65  | -2.13626 |
|             |         |         |          | 1.78094E-05 | 8752.53 | 4097.75 | -2.13593 |
| 0.000743834 | 649.6   | 297.2   | -2.18573 | 0.013916    | 899.633 | 421.233 | -2.13571 |
|             |         |         |          | 0.0156402   | 1062.93 | 498.2   | -2.13355 |
|             |         |         |          | 0.00808098  | 1082.55 | 507.65  | -2.13247 |
|             |         |         |          | 0.0156801   | 1496.45 | 701.8   | -2.1323  |
| 0.00271944  | 817.95  | 396.475 | -2.06306 | 0.00109423  | 1443.98 | 677.85  | -2.13023 |
|             |         |         |          | 0.00778447  | 882.55  | 414.6   | -2.12868 |
|             |         |         |          | 0.00116837  | 1858.88 | 874.1   | -2.12662 |
|             |         |         |          | 0.000055277 | 1329.2  | 626.767 | -2.12073 |
| 0.00566929  | 769.433 | #DIV/0! | #DIV/0!  | 0.0111279   | 1875.08 | 884.2   | -2.12065 |
|             |         |         |          | 0.00164438  | 1355.15 | 639.1   | -2.1204  |
|             |         |         |          | 9.77945E-05 | 1618.87 | 764.75  | -2.11686 |
| 0.00489698  | 2176.1  | 1017.65 | -2.13836 | 0.001164    | 3604.6  | 1702.83 | -2.11682 |
|             |         |         |          | 0.0154709   | 1434.68 | 679.133 | -2.11251 |
|             |         |         |          | 0.00344905  | 1200.3  | 568.233 | -2.11234 |
|             |         |         |          | 4.67992E-05 | 6079.1  | 2878.7  | -2.11175 |
|             |         |         |          | 0.00212537  | 882.167 | 417.8   | -2.11146 |
|             |         |         |          | 0.000106042 | 1548.6  | 733.45  | -2.11139 |
| 0.0097435   | 932.167 | #DIV/0! | #DIV/0!  | 0.000878045 | 2057.23 | 975     | -2.10997 |
|             |         |         |          | 5.89321E-05 | 1468.1  | 696.6   | -2.10752 |
|             |         |         |          | 0.00257208  | 1049.8  | 498.5   | -2.10592 |
|             |         |         |          | 5.88154E-06 | 4068.93 | 1932.45 | -2.10558 |
|             |         |         |          | 0.0186917   | 1205.1  | 572.8   | -2.10388 |
| 7.57241E-05 | 975.275 | 392.7   | -2.48351 | 0.000507777 | 1358.38 | 645.825 | -2.10332 |
|             |         |         |          | 0.00297913  | 1725.83 | 821.2   | -2.1016  |
|             |         |         |          | 4.80912E-06 | 2740.45 | 1304.73 | -2.1004  |
|             |         |         |          | 0.0225231   | 1184.43 | 564.4   | -2.09856 |
|             |         |         |          | 0.000139455 | 2656.4  | 1266.1  | -2.0981  |
| 0.00499496  | 564.975 | 268.325 | -2.10556 | 0.00823805  | 1159.43 | 552.775 | -2.09746 |
|             |         |         |          | 0.00192666  | 1705.65 | 813.55  | -2.09655 |
|             |         |         |          | 0.0022725   | 920.133 | 438.95  | -2.09621 |
|             |         |         |          | 0.00010234  | 3336.78 | 1591.9  | -2.0961  |
|             |         |         |          | 2.28558E-05 | 1009.67 | 481.767 | -2.09576 |
| 0.0030084   | 1248.87 | #DIV/0! | #DIV/0!  | 0.000121083 | 2403.07 | 1146.7  | -2.09564 |
| 0.00165962  | 797.3   | 380.55  | -2.09513 | 0.00145639  | 977.1   | 466.467 | -2.09468 |
|             |         |         |          | 1.75046E-08 | 174596  | 83356.3 | -2.09457 |

|         |             |         |         |          |             |         |         |          |
|---------|-------------|---------|---------|----------|-------------|---------|---------|----------|
|         |             |         |         |          | 0.00353276  | 1122.47 | 536.833 | -2.0909  |
|         |             |         |         |          | 0.00522078  | 1422.47 | 680.6   | -2.09002 |
| -2.0582 | 1.20048E-07 | 3377.85 | 1167.8  | -2.89249 | 3.48758E-05 | 3399.73 | 1627.45 | -2.08899 |
| -3.0107 | 7.30303E-13 | 6442.75 | 1845.25 | -3.49153 | 1.13835E-07 | 4786.13 | 2291.9  | -2.08828 |
|         | 0.00129444  | 1016.33 | 393.767 | -2.58103 | 0.00501336  | 1426.27 | 683.067 | -2.08803 |
|         |             |         |         |          | 0.00139338  | 1718.3  | 823.033 | -2.08776 |
|         |             |         |         |          | 0.00199653  | 690.767 | 330.9   | -2.08754 |
|         |             |         |         |          | 9.41742E-05 | 2098.25 | 1005.45 | -2.08688 |
|         |             |         |         |          | 0.00231782  | 1465.95 | 703.2   | -2.08468 |
|         |             |         |         |          | 0.000369266 | 2706.23 | 1298.48 | -2.08416 |
|         | 0.00367013  | 926.4   | 455.2   | -2.03515 | 0.000557788 | 1765.55 | 847.2   | -2.08398 |
|         |             |         |         |          | 6.54785E-05 | 1324.57 | 635.675 | -2.08372 |
|         | 3.98648E-06 | 1080    | #DIV/0! | #DIV/0!  | 9.42682E-05 | 1471.5  | 706.65  | -2.08236 |
|         | 9.48931E-06 | 939.3   | 438.1   | -2.14403 | 8.69216E-06 | 1724.43 | 828.9   | -2.08039 |
|         | 1.34318E-06 | 1267.08 | 603.975 | -2.09789 | 2.30915E-06 | 1521.55 | 731.7   | -2.07947 |
|         | 0.000407669 | 708.15  | 336.775 | -2.10274 | 0.00038494  | 1188.78 | 571.85  | -2.07882 |
|         | 4.72307E-05 | 1132.77 | 329.95  | -3.43315 | 0.00395283  | 1779.77 | 856.15  | -2.0788  |
| 2.29236 |             |         |         |          | 0.000113968 | 1938.3  | 933.55  | -2.07627 |
|         | 0.00215026  | 713.5   | 280.467 | -2.54397 | 0.00755722  | 784.875 | 378.3   | -2.07474 |
|         |             |         |         |          | 0.00652909  | 1713.63 | 827.375 | -2.07116 |
|         | 1.02133E-05 | 1068.45 | 414.467 | -2.57789 | 6.44151E-05 | 2060.63 | 995.125 | -2.07072 |
|         |             |         |         |          | 0.00172489  | 1122.93 | 542.5   | -2.06991 |
|         |             |         |         |          | 0.000227199 | 1242.8  | 600.667 | -2.06903 |
|         |             |         |         |          | 0.00143914  | 857.567 | 414.6   | -2.06842 |
|         |             |         |         |          | 0.013628    | 1157.57 | 560.433 | -2.06549 |
|         |             |         |         |          | 0.00380682  | 1202.93 | 582.6   | -2.06477 |
|         |             |         |         |          | 0.00364938  | 1566.73 | 760.75  | -2.05946 |
|         |             |         |         |          | 0.0142896   | 800.65  | 388.8   | -2.05928 |
|         | 5.75409E-05 | 1234.38 | 534.9   | -2.30767 | 4.18773E-05 | 1485.95 | 722.075 | -2.05789 |
|         |             |         |         |          | 1.96426E-07 | 1673.65 | 814.3   | -2.05532 |
|         |             |         |         |          | 5.81238E-05 | 2816.05 | 1371.85 | -2.05274 |
|         | 4.56303E-07 | 2893.15 | 1253.65 | -2.30778 | 1.23348E-05 | 3769.5  | 1838.25 | -2.05059 |
|         |             |         |         |          | 0.0107798   | 666.875 | 325.233 | -2.05045 |
|         |             |         |         |          | 0.0157993   | 2023.85 | 987.533 | -2.0494  |
|         |             |         |         |          | 0.000672825 | 823.05  | 401.867 | -2.04807 |
|         | 1.17673E-05 | 6002.88 | 2662.75 | -2.25439 | 0.000218376 | 9878.58 | 4827.48 | -2.04632 |
|         |             |         |         |          | 1.69595E-05 | 1226.48 | 599.4   | -2.04617 |
|         |             |         |         |          | 0.00012015  | 1729.83 | 846.825 | -2.04272 |
|         |             |         |         |          | 0.00540772  | 1512.23 | 741.5   | -2.03941 |
|         |             |         |         |          | 0.0117644   | 1287.38 | 631.55  | -2.03844 |
|         | 0.000881323 | 1403.98 | 608.675 | -2.30661 | 0.00634026  | 1961.45 | 962.3   | -2.03829 |
|         |             |         |         |          | 5.09908E-05 | 1457.3  | 715     | -2.03818 |
| -2.655  | 2.66035E-07 | 688.875 | 252.1   | -2.73255 | 0.000026082 | 1013.3  | 497.425 | -2.03709 |
|         |             |         |         |          | 0.014954    | 919.933 | 451.7   | -2.0366  |
|         | 0.000416807 | 1455    | 459.333 | -3.16763 | 0.0106541   | 1651.45 | 812.1   | -2.03355 |
|         |             |         |         |          | 0.00615226  | 784.4   | 385.9   | -2.03265 |
|         |             |         |         |          | 0.00160207  | 820.1   | 403.475 | -2.03259 |
|         |             |         |         |          | 0.00858368  | 1426.4  | 702.7   | -2.02988 |
|         |             |         |         |          | 0.0140127   | 1262.5  | 622.2   | -2.02909 |
|         |             |         |         |          | 8.76159E-06 | 1872.85 | 923.267 | -2.0285  |
|         |             |         |         |          | 1.95339E-06 | 1350.83 | 666.1   | -2.02796 |
|         |             |         |         |          | 0.000343294 | 1665.33 | 821.8   | -2.02644 |
|         | 0.00294476  | 1337.4  | #DIV/0! | #DIV/0!  | 0.00205372  | 2213.93 | 1093.5  | -2.02463 |
|         |             |         |         |          | 1.05806E-05 | 39266.7 | 19412.6 | -2.02275 |
|         | 2.33444E-05 | 2674.95 | 1024.28 | -2.61155 | 0.000870127 | 4038.03 | 1997.65 | -2.02139 |
|         |             |         |         |          | 0.00197549  | 2349.95 | 1162.68 | -2.02116 |
|         |             |         |         |          | 0.0186596   | 3555.57 | 1760.23 | -2.01995 |
|         | 6.26625E-06 | 1480.8  | 620.925 | -2.38483 | 0.000076188 | 1671.5  | 827.65  | -2.01957 |
|         |             |         |         |          | 0.00688811  | 981.55  | 486.1   | -2.01923 |
|         | 4.64763E-06 | 1087.65 | 428.8   | -2.5365  | 5.04771E-06 | 1468.25 | 727.367 | -2.01858 |
|         |             |         |         |          | 0.0143959   | 1074.65 | 532.5   | -2.01812 |
|         | 0.000104049 | 1233.15 | 571.375 | -2.15821 | 0.000177258 | 1875.08 | 929.125 | -2.01811 |
|         |             |         |         |          | 0.000148192 | 1699.38 | 843.225 | -2.01533 |

|         |             |         |         |          |             |         |         |          |
|---------|-------------|---------|---------|----------|-------------|---------|---------|----------|
|         |             |         |         |          | 0.00195204  | 1091.35 | 541.7   | -2.01468 |
|         |             |         |         |          | 0.0223879   | 1324.23 | 657.6   | -2.01372 |
|         | 0.000143223 | 3644.75 | 1680.78 | -2.16849 | 0.000442006 | 6786.8  | 3370.68 | -2.01348 |
|         |             |         |         |          | 0.00292475  | 1279.23 | 635.375 | -2.01334 |
|         |             |         |         |          | 0.000692536 | 1089.78 | 541.533 | -2.01239 |
|         |             |         |         |          | 1.35754E-05 | 5976.15 | 2973.7  | -2.00967 |
|         |             |         |         |          | 1.45289E-05 | 1394.15 | 694.95  | -2.00612 |
|         |             |         |         |          | 0.0226465   | 1027.68 | 513.2   | -2.00248 |
|         | 4.50048E-08 | 1255.18 | 394.3   | -3.1833  | 0.000207058 | 1317.35 | 658.125 | -2.00167 |
|         |             |         |         |          | 0.00710675  | 732.767 | 366.1   | -2.00155 |
|         |             |         |         |          | 4.50658E-07 | 1203.27 | 2429.23 | 2.01886  |
|         |             |         |         |          | 0.000220726 | 1165    | 2357.03 | 2.0232   |
|         |             |         |         |          | 4.21433E-10 | 4858.5  | 9840.5  | 2.02542  |
|         |             |         |         |          | 4.81324E-07 | 2120.55 | 4306.45 | 2.03082  |
|         |             |         |         |          | 9.95915E-05 | 2388.88 | 4852.73 | 2.03139  |
| 2.91166 | 3.3602E-06  | 301.433 | 1550.38 | 5.14334  | 0.0133111   | 759.233 | 1544.28 | 2.03399  |
|         |             |         |         |          | 0.000100719 | 1687.38 | 3435.7  | 2.03612  |
|         |             |         |         |          | 5.14892E-05 | 1549.5  | 3170.98 | 2.04645  |
|         |             |         |         |          | 1.12714E-06 | 4138.48 | 8477.58 | 2.04848  |
|         |             |         |         |          | 0.000319145 | 17657.7 | 36186.5 | 2.04934  |
| -2.1518 |             |         |         |          | 0.00781941  | 416.833 | 855.75  | 2.05298  |
|         |             |         |         |          | 0.000206338 | 2571.83 | 5281.3  | 2.05352  |
|         |             |         |         |          | 0.000213374 | 1120    | 2311.58 | 2.06391  |
|         |             |         |         |          | 8.63859E-11 | 8677.98 | 17960   | 2.06961  |
|         |             |         |         |          | 3.34976E-12 | 4303.55 | 8920    | 2.07271  |
|         |             |         |         |          | 6.97299E-07 | 2873.68 | 5990.1  | 2.08447  |
|         |             |         |         |          | 4.89486E-05 | 1198.05 | 2499    | 2.08589  |
|         |             |         |         |          | 0.00197336  | 1337.7  | 2826.43 | 2.1129   |
| 4.09583 |             |         |         |          | 0.00012765  | 2119.53 | 4484.15 | 2.11564  |
|         |             |         |         |          | 0.00260608  | 1624.58 | 3454.23 | 2.12623  |
|         |             |         |         |          | 2.10586E-05 | 3205.93 | 6855.78 | 2.13847  |
|         |             |         |         |          | 7.43103E-07 | 1830.7  | 3928.7  | 2.14601  |
|         |             |         |         |          | 9.94291E-08 | 2122.93 | 4558.08 | 2.14706  |
|         |             |         |         |          | 1.50735E-06 | 1735.9  | 3745.63 | 2.15774  |
|         |             |         |         |          | 6.67701E-06 | 1530.93 | 3303.95 | 2.15814  |
|         |             |         |         |          | 4.90963E-06 | 1441.95 | 3124.43 | 2.16681  |
|         | 5.01053E-06 | 531.233 | 1970.33 | 3.70896  | 0.000833227 | 812.3   | 1766.95 | 2.17524  |
|         |             |         |         |          | 1.86633E-05 | 1197.33 | 2614.25 | 2.18339  |
|         |             |         |         |          | 0.00121888  | 1547.15 | 3383.23 | 2.18675  |
|         |             |         |         |          | 0.000136057 | 1086.58 | 2396.95 | 2.20597  |
| 3.37098 | 0.000631485 | 2094.55 | 4434.55 | 2.11719  | 0.000013734 | 2022.1  | 4464.08 | 2.20764  |
|         |             |         |         |          | 0.0105188   | 505.967 | 1123.63 | 2.22075  |
| 2.14549 |             |         |         |          | 2.18563E-05 | 573.3   | 1294.1  | 2.25728  |
|         | 0.000161419 | 1540.68 | 4122.98 | 2.67608  | 9.87556E-08 | 1380.35 | 3117.85 | 2.25874  |
|         |             |         |         |          | 1.19255E-09 | 1797.5  | 4068.65 | 2.2635   |
|         |             |         |         |          | 9.23603E-06 | 1260.95 | 2860.18 | 2.26827  |
|         |             |         |         |          | 5.56039E-09 | 4677.88 | 10640.1 | 2.27456  |
|         | 1.13503E-06 | 937.575 | 3044.08 | 3.24675  | 9.39135E-05 | 1425    | 3242.5  | 2.27544  |
|         |             |         |         |          | 0.000223794 | 1396.78 | 3194.65 | 2.28716  |
| 5.87628 | 1.74694E-09 | 542.7   | 2100.1  | 3.86973  | 3.45558E-08 | 1093.15 | 2516.1  | 2.3017   |
|         |             |         |         |          | 2.80285E-05 | 1644.95 | 3800.08 | 2.31015  |
|         |             |         |         |          | 1.62952E-10 | 2424.68 | 5647.28 | 2.32909  |
|         |             |         |         |          | 4.21065E-05 | 2204    | 5148.25 | 2.33587  |
|         |             |         |         |          | 0.000145952 | 1442.13 | 3380.73 | 2.34425  |
| -2.0643 |             |         |         |          | 0.00046261  | 1727.53 | 4068.13 | 2.35489  |
|         |             |         |         |          | 2.3658E-06  | 1209.4  | 2881.95 | 2.38296  |
| 2.07809 | 1.28046E-09 | 9270.48 | 22106.5 | 2.38461  | 2.59474E-09 | 6518.23 | 15564.7 | 2.38787  |
|         |             |         |         |          | 9.80468E-05 | 778.133 | 1867.93 | 2.40052  |
|         |             |         |         |          | 1.54258E-06 | 5540.38 | 13560.4 | 2.44755  |
|         |             |         |         |          | 5.87857E-07 | 3669.45 | 9000.43 | 2.4528   |
|         |             |         |         |          | 0.00525219  | 910.8   | 2248.9  | 2.46915  |
|         |             |         |         |          | 3.34607E-11 | 2251.1  | 5581.5  | 2.47945  |
| 3.93277 | 3.65046E-07 | 850.3   | 2564.73 | 3.01626  | 6.98548E-05 | 1274.1  | 3192.75 | 2.50589  |

|         |             |         |         |         |             |         |         |         |
|---------|-------------|---------|---------|---------|-------------|---------|---------|---------|
|         |             |         |         |         | 2.52273E-10 | 6461.98 | 16276.7 | 2.51885 |
|         |             |         |         |         | 8.40736E-07 | 1584.63 | 3992.85 | 2.51974 |
|         | 0.000042532 | 4617.83 | 15023.5 | 3.25337 | 0.000714309 | 5173.85 | 13050.3 | 2.52235 |
|         |             |         |         |         | 8.80085E-08 | 1470.7  | 3763.9  | 2.55926 |
|         | 0.00441229  | 1201.27 | 2486.98 | 2.07029 | 5.13784E-07 | 1118.3  | 2867.68 | 2.56432 |
|         |             |         |         |         | 9.40859E-08 | 489.3   | 1259.63 | 2.57434 |
|         |             |         |         |         | 2.01429E-06 | 2206.63 | 5730.75 | 2.59706 |
|         |             |         |         |         | 0.000158641 | 1031.08 | 2724.28 | 2.64217 |
|         | 2.65827E-09 | 3847.38 | 14510.4 | 3.77149 | 1.75581E-07 | 3194.9  | 8488.33 | 2.65684 |
| 2.46502 | 1.96682E-05 | 1860.03 | 4071.3  | 2.18884 | 9.39659E-07 | 1718.83 | 4599.9  | 2.67619 |
|         |             |         |         |         | 3.49543E-10 | 1609.58 | 4364.3  | 2.71146 |
| 2.19173 |             |         |         |         | 4.75794E-08 | 1087.73 | 2988.95 | 2.74789 |
|         |             |         |         |         | 6.923E-09   | 6753.85 | 18915.7 | 2.80072 |
| 2.5378  | 4.53668E-09 | 7924.08 | 19930.9 | 2.51523 | 2.93964E-10 | 4938.5  | 13959.8 | 2.82673 |
|         |             |         |         |         | 1.18082E-06 | 1188.25 | 3407.48 | 2.86764 |
| 4.21672 | 3.89663E-05 | 652.333 | 1394.63 | 2.1379  | 2.10151E-06 | 546     | 1569.95 | 2.87537 |
| 5.91925 | 0.00115256  | 602.75  | 3548.33 | 5.88689 | 0.00490093  | 2630.9  | 7570.88 | 2.87767 |
|         |             |         |         |         | 4.01886E-05 | 693.733 | 2016.13 | 2.90662 |
|         | 3.63435E-07 | 2590.08 | 5565.63 | 2.14883 | 2.53267E-10 | 1857.15 | 5401.83 | 2.90866 |
|         |             |         |         |         | 5.72218E-07 | 1368.13 | 4037.23 | 2.95092 |
|         |             |         |         |         | 5.36992E-12 | 3532.55 | 10563.2 | 2.99024 |
|         |             |         |         |         | 1.51881E-09 | 1232.4  | 3697.83 | 3.00051 |
|         |             |         |         |         | 1.01734E-09 | 2554.25 | 7674.45 | 3.00458 |
|         | 0.001009    | 1909.95 | 4271.15 | 2.23626 | 1.6459E-06  | 1771.05 | 5413.8  | 3.05683 |
| 3.26109 | 4.84258E-07 | 974.325 | 2472.83 | 2.53799 | 1.99035E-08 | 1547.53 | 4743.63 | 3.06528 |
|         |             |         |         |         | 8.26704E-09 | 3054.98 | 9673    | 3.16631 |
|         |             |         |         |         | 0.000102029 | 2600.2  | 8364.6  | 3.21691 |
| 3.18733 | 3.79293E-13 | 718.2   | 2645.73 | 3.68383 | 2.4709E-12  | 1272.4  | 4124.65 | 3.24163 |
| 3.42074 | 0.000282491 | 916.3   | 2157.43 | 2.3545  | 3.64905E-06 | 793.2   | 2575.05 | 3.24641 |
|         | 4.14957E-06 | 1768.05 | 6444.43 | 3.64493 | 3.65939E-05 | 2124.23 | 6914.38 | 3.25501 |
| 3.14691 | 9.61953E-06 | 1247.25 | 2809.73 | 2.25274 | 7.51463E-09 | 1816.4  | 5925.98 | 3.26248 |
|         |             |         |         |         | 3.07161E-11 | 34643.4 | 114841  | 3.31495 |
|         |             |         |         |         | 6.15206E-10 | 1619.35 | 5381.68 | 3.32336 |
|         |             |         |         |         | 8.92027E-15 | 4662.1  | 15512.2 | 3.3273  |
|         | 4.16893E-06 | 4448.93 | 10534.8 | 2.36793 | 5.58637E-10 | 2462.93 | 8266.6  | 3.35642 |
| 2.55423 | 1.54166E-10 | 10596.5 | 34780.1 | 3.28222 | 1.77944E-11 | 7531.73 | 25469.3 | 3.38161 |
|         |             |         |         |         | 3.65505E-08 | 4064.2  | 13814.3 | 3.39903 |
|         | 1.58983E-05 | 3110.1  | 7083.98 | 2.27773 | 6.21808E-09 | 2224.08 | 7654.6  | 3.4417  |
|         |             |         |         |         | 3.24209E-10 | 1339.5  | 4704.83 | 3.51237 |
|         | 0.000101268 | 3534.78 | 7360.98 | 2.08245 | 2.9245E-09  | 2298.83 | 8358.5  | 3.63599 |
|         |             |         |         |         | 3.32504E-07 | 5000.53 | 18283.6 | 3.65633 |
| 5.7824  | 2.92813E-09 | 368.067 | 2288.83 | 6.21851 | 2.48939E-07 | 764     | 2802.58 | 3.66829 |
|         | 0.000948803 | #DIV/0! | 5825.35 | #DIV/0! | 0.00527787  | 1377.8  | 5060.2  | 3.67267 |
|         | 4.093E-11   | 4093.95 | 19313.3 | 4.71752 | 2.91886E-09 | 4090.2  | 15062.6 | 3.68259 |
|         |             |         |         |         | 2.20256E-07 | 1299.15 | 4823.23 | 3.7126  |
|         |             |         |         |         | 2.036E-11   | 2665.23 | 9991.08 | 3.74868 |
|         |             |         |         |         | 4.23884E-07 | 4672.9  | 17570.6 | 3.76011 |
| 2.02419 | 7.75976E-06 | 3855.5  | 13308.5 | 3.45181 | 1.17677E-06 | 2985.43 | 11234   | 3.76296 |
|         |             |         |         |         | 4.84862E-14 | 1212.8  | 4594.6  | 3.78842 |
|         |             |         |         |         | 1.98277E-08 | 4854.65 | 18557.6 | 3.82265 |
|         |             |         |         |         | 3.03445E-08 | 4144.33 | 15951.4 | 3.84897 |
| 2.53552 | 9.92219E-10 | 2561.53 | 10729.6 | 4.18875 | 9.81522E-12 | 1908.7  | 7414.15 | 3.8844  |
| 2.20242 | 4.11504E-07 | 3482.38 | 15719.4 | 4.51398 | 7.26995E-12 | 3911.3  | 15587.8 | 3.98532 |
|         |             |         |         |         | 1.54925E-07 | 1369.3  | 5517.73 | 4.0296  |
|         | 0.000129251 | 409.9   | 1712    | 4.17663 | 4.95108E-05 | 926.1   | 3765.9  | 4.06641 |
|         |             |         |         |         | 1.88084E-07 | 496.9   | 2241.3  | 4.51057 |
|         | 0.000123895 | 7458.3  | 15793.6 | 2.11759 | 2.80915E-11 | 3699.2  | 18308.9 | 4.94941 |
|         | 3.78747E-11 | 1659.28 | 4075    | 2.45589 | 3.26354E-21 | 1412.6  | 7135.9  | 5.05161 |
| 2.66322 | 1.19803E-10 | 1948.5  | 12355.4 | 6.34095 | 6.52015E-09 | 1682.75 | 8609.33 | 5.11622 |
|         |             |         |         |         | 2.6887E-12  | 3120.73 | 16221.7 | 5.19806 |
| 11.154  | 4.33594E-16 | 1023.8  | 11049.6 | 10.7927 | 1.48926E-14 | 2055.9  | 10760.4 | 5.23389 |
| #DIV/0! | 1.65719E-09 | 896.6   | 3879.2  | 4.32657 | 1.46876E-12 | 1541.8  | 8108.53 | 5.25913 |
| 2.69212 | 1.55637E-06 | 1301.43 | 4880.9  | 3.75043 | 1.30844E-09 | 1254.33 | 6687.9  | 5.33184 |



|         |             |         |         |          |             |         |         |         |
|---------|-------------|---------|---------|----------|-------------|---------|---------|---------|
| 2.48802 | 8.42506E-06 | 5740.75 | 18660.6 | 3.25056  | 1.09758E-10 | 3770.55 | 20146.7 | 5.34318 |
|         |             |         |         |          | 0.00508834  | 571.7   | 3083.18 | 5.39299 |
| 3.33041 | 4.67338E-08 | 1332.18 | 5677.9  | 4.26213  | 2.42888E-12 | 1118.97 | 6077.3  | 5.43117 |
| 4.00495 | 4.1262E-09  | 2285.65 | 13044.3 | 5.70702  | 5.3313E-10  | 2224.78 | 13156.8 | 5.91378 |
| 14.7005 | 9.23972E-17 | 549.65  | 6004.7  | 10.9246  | 1.18104E-13 | 1080.97 | 6693.93 | 6.19254 |
| 2.36171 | 4.21697E-13 | 6686.73 | 25465.2 | 3.80833  | 1.36856E-17 | 5041.63 | 32237.2 | 6.39421 |
|         | 5.46986E-07 | 4779.95 | 13465.9 | 2.81716  | 2.60959E-15 | 1359.6  | 9615.6  | 7.07237 |
| 2.6473  | 5.77853E-12 | 3580.68 | 13500.9 | 3.77048  | 1.65896E-17 | 2238.3  | 16382.2 | 7.31901 |
| 4.63028 | 5.5678E-17  | 1328.9  | 8597.28 | 6.46947  | 3.15778E-18 | 1868.43 | 13829.1 | 7.40147 |
| 2.06319 | 3.54827E-09 | 1956.4  | 6865.4  | 3.5092   | 1.35002E-14 | 848.975 | 6931.48 | 8.16452 |
| 2.04528 | 1.53148E-11 | 6659.2  | 25374.7 | 3.81048  | 4.6381E-19  | 2103.48 | 19490.8 | 9.266   |
| 3.30965 | 2.33645E-05 | 10133.5 | 37990.1 | 3.74896  | 5.22972E-11 | 4458.83 | 44714   | 10.0282 |
|         |             |         |         |          | 2.24461E-06 | 2174.55 | 22905.3 | 10.5333 |
| 2.51517 | 1.9795E-06  | 3858.88 | 18278.7 | 4.73678  | 1.79235E-10 | 2208.75 | 23710.2 | 10.7346 |
| 4.40352 | 1.15124E-12 | 7089.95 | 57877.7 | 8.16334  | 7.4138E-15  | 6738.43 | 75371.8 | 11.1854 |
|         | 1.18519E-06 | 3357.48 | 11616.9 | 3.46     | 2.04411E-14 | 1076.4  | 12084.9 | 11.2271 |
| 7.57706 | 1.09277E-09 | 663.667 | 4866.6  | 7.3329   | 1.67491E-12 | 933.8   | 11010.4 | 11.791  |
| 5.0673  | 1.24641E-13 | 2818.35 | 19527.8 | 6.92881  | 4.60235E-17 | 2802.48 | 33822.2 | 12.0687 |
| 3.07552 | 1.65615E-08 | 1606.9  | 13519.7 | 8.41354  | 2.89713E-14 | 1519.45 | 22143.1 | 14.5731 |
| 2.99576 | 1.22675E-05 | 1453.03 | 13976.5 | 9.61884  | 3.73519E-09 | 2161    | 33865.4 | 15.6712 |
|         | 4.84041E-05 | 898.15  | 237.7   | -3.7785  | 3.81976E-06 | 952.933 | #DIV/0! | #DIV/0! |
|         | 0.000880806 | 577.2   | 176.1   | -3.27768 | 0.000174698 | 797.233 | #DIV/0! | #DIV/0! |
|         | 0.0030776   | 533.675 | 171.167 | -3.11787 | 3.06888E-06 | 841.767 | #DIV/0! | #DIV/0! |
|         | 1.09255E-07 | 1299.1  | 440.35  | -2.95015 | 1.4326E-08  | 1805.87 | #DIV/0! | #DIV/0! |
|         | 0.00233695  | 1099.83 | 377.9   | -2.91036 | 2.80076E-05 | 1856.58 | #DIV/0! | #DIV/0! |
|         | 7.39341E-05 | 1069.25 | 371.45  | -2.87858 | 9.35531E-07 | 2179.5  | #DIV/0! | #DIV/0! |
|         | 5.58118E-05 | 964.233 | 339.1   | -2.84351 | 3.57947E-06 | 1428.75 | #DIV/0! | #DIV/0! |
|         | 7.57708E-05 | 1348.57 | 489.7   | -2.75386 | 0.0035796   | 1917.7  | #DIV/0! | #DIV/0! |
|         | 3.41279E-09 | 2436.58 | 974.575 | -2.50014 | 0.00247969  | #DIV/0! | 1296.33 | #DIV/0! |
|         | 3.06137E-05 | 900.667 | 384     | -2.34549 | 1.24614E-05 | 1816.38 | #DIV/0! | #DIV/0! |
|         | 0.00549338  | 669     | 304.1   | -2.19993 | 0.00229859  | 1565.4  | #DIV/0! | #DIV/0! |
|         | 0.00265502  | 561.767 | 260.2   | -2.15898 | 0.0102007   | 1220.65 | #DIV/0! | #DIV/0! |
|         | 0.00552158  | 1414.65 | 2893.95 | 2.0457   | 6.84328E-08 | #DIV/0! | 3067.73 | #DIV/0! |
|         | 5.06018E-05 | 576.55  | 1256.8  | 2.17986  | 0.000356964 | #DIV/0! | 1209.58 | #DIV/0! |
|         | 0.000243207 | 555.3   | 1245.98 | 2.24379  | 0.00836709  | #DIV/0! | 1043.9  | #DIV/0! |
| 2.42721 | 3.73958E-06 | 1818.6  | 4114.23 | 2.2623   | 3.67893E-11 | #DIV/0! | 2960.73 | #DIV/0! |
|         | 0.00567734  | 996.7   | 2299.28 | 2.30689  | 0.000158501 | #DIV/0! | 1715.23 | #DIV/0! |
|         | 9.17216E-06 | 803.8   | 1865.83 | 2.32126  | 5.89055E-05 | #DIV/0! | 1646.1  | #DIV/0! |
| 2.53938 | 0.000637671 | 3396.98 | 8151.6  | 2.39966  | 3.83019E-09 | #DIV/0! | 5848.53 | #DIV/0! |
| 2.03238 | 0.000190215 | 2109.3  | 5272.5  | 2.49964  | 1.44654E-10 | #DIV/0! | 5769.58 | #DIV/0! |
| 3.48057 | 1.34678E-07 | 869.15  | 2864.13 | 3.29532  | 1.15998E-10 | #DIV/0! | 3187.18 | #DIV/0! |
| 5.03948 | 7.20451E-06 | 355.7   | 2430.68 | 6.8335   | 2.18973E-05 | #DIV/0! | 2615.28 | #DIV/0! |
|         | 1.30607E-06 | 288.9   | 2289.65 | 7.92541  | 1.97479E-08 | #DIV/0! | 3959.45 | #DIV/0! |
| 3.59228 | 7.47098E-10 | 1049.3  | 9088.35 | 8.66135  | 6.38214E-14 | #DIV/0! | 17714.6 | #DIV/0! |
| 2.86394 | 0.000643403 | #DIV/0! | 1203.73 | #DIV/0!  | 0.00413477  | #DIV/0! | 1368.9  | #DIV/0! |
| #DIV/0! | 0.000366443 | #DIV/0! | 2439.03 | #DIV/0!  | 0.0102385   | #DIV/0! | 3002.58 | #DIV/0! |
| #DIV/0! | 2.29342E-06 | #DIV/0! | 4399.93 | #DIV/0!  | 9.88346E-06 | #DIV/0! | 4016.2  | #DIV/0! |
| #DIV/0! | 6.10816E-08 | #DIV/0! | 7425.53 | #DIV/0!  | 3.08772E-08 | #DIV/0! | 11783.6 | #DIV/0! |
| #DIV/0! | 3.4668E-13  | #DIV/0! | 13091.2 | #DIV/0!  | 7.60845E-12 | #DIV/0! | 20890.1 | #DIV/0! |
| #DIV/0! | 4.59115E-06 | #DIV/0! | 3420.63 | #DIV/0!  | 4.80469E-08 | #DIV/0! | 8751.95 | #DIV/0! |
| #DIV/0! | 8.17157E-07 | #DIV/0! | 2092.73 | #DIV/0!  | 2.23664E-08 | #DIV/0! | 3085.28 | #DIV/0! |
| #DIV/0! | 0.00120113  | #DIV/0! | 1505.47 | #DIV/0!  | 0.00239604  | #DIV/0! | 3033.53 | #DIV/0! |
|         | 1.43801E-05 | 658.833 | #DIV/0! | #DIV/0!  | 0.00544766  | 1245    | #DIV/0! | #DIV/0! |
|         | 0.000014443 | #DIV/0! | 1080.93 | #DIV/0!  | 4.13151E-07 | #DIV/0! | 1228.27 | #DIV/0! |
|         | 4.65999E-05 | 696.333 | #DIV/0! | #DIV/0!  | 0.00494427  | 1029.53 | #DIV/0! | #DIV/0! |
|         | 6.56488E-05 | #DIV/0! | 993.125 | #DIV/0!  | 0.00030563  | #DIV/0! | 1197.6  | #DIV/0! |
|         | 0.000223088 | #DIV/0! | 975.975 | #DIV/0!  | 0.00104164  | #DIV/0! | 1015.93 | #DIV/0! |
|         | 0.000357542 | #DIV/0! | 1023.75 | #DIV/0!  | 8.25226E-08 | #DIV/0! | 1596.93 | #DIV/0! |
|         | 0.000419885 | #DIV/0! | 596.5   | #DIV/0!  | 0.00172963  | #DIV/0! | 1021.2  | #DIV/0! |
|         | 0.00161714  | 833.333 | #DIV/0! | #DIV/0!  | 0.00203702  | 1100.63 | #DIV/0! | #DIV/0! |
|         | 0.00207455  | 727.167 | #DIV/0! | #DIV/0!  | 0.00572525  | 2023.68 | #DIV/0! | #DIV/0! |
|         | 0.00224031  | #DIV/0! | 1542.23 | #DIV/0!  | 5.37833E-05 | #DIV/0! | 2242.73 | #DIV/0! |
|         | 0.00226305  | 549.267 | #DIV/0! | #DIV/0!  | 0.000306486 | 1266.6  | #DIV/0! | #DIV/0! |

|            |         |         |         |             |         |         |         |
|------------|---------|---------|---------|-------------|---------|---------|---------|
| 0.00569271 | #DIV/0! | 895.55  | #DIV/0! | 0.00111858  | #DIV/0! | 1598.78 | #DIV/0! |
| 0.00643802 | #DIV/0! | 560.767 | #DIV/0! | 0.000248057 | #DIV/0! | 1316.3  | #DIV/0! |
| 0.00654582 | 519.433 | #DIV/0! | #DIV/0! | 0.0011071   | 1022.43 | #DIV/0! | #DIV/0! |
| 0.00671462 | 592.867 | #DIV/0! | #DIV/0! | 0.000157967 | 1199.93 | #DIV/0! | #DIV/0! |
| 0.00827611 | #DIV/0! | 1580.33 | #DIV/0! | 0.0210761   | #DIV/0! | 1286.77 | #DIV/0! |
| 0.0138275  | #DIV/0! | 954.375 | #DIV/0! | 4.39528E-06 | #DIV/0! | 1382.35 | #DIV/0! |
| -2.2861    |         |         |         | 2.30885E-09 | #DIV/0! | 1259.45 | #DIV/0! |
| 2.13516    |         |         |         | 0.000180198 | #DIV/0! | 4821    | #DIV/0! |
| 3.48307    |         |         |         | 3.48514E-07 | #DIV/0! | 6294.85 | #DIV/0! |
| #DIV/0!    |         |         |         | 0.000129042 | #DIV/0! | 1216.8  | #DIV/0! |
|            |         |         |         | 4.09047E-05 | #DIV/0! | 6068.53 | #DIV/0! |
|            |         |         |         | 1.64203E-06 | #DIV/0! | 1101.55 | #DIV/0! |
|            |         |         |         | 5.31108E-14 | #DIV/0! | 5764.95 | #DIV/0! |
|            |         |         |         | 2.22025E-10 | #DIV/0! | 1819.07 | #DIV/0! |
|            |         |         |         | 6.23128E-10 | 1428.85 | #DIV/0! | #DIV/0! |
|            |         |         |         | 2.32259E-09 | #DIV/0! | 2534.05 | #DIV/0! |
|            |         |         |         | 1.91962E-08 | 1539.83 | #DIV/0! | #DIV/0! |
|            |         |         |         | 3.79163E-08 | #DIV/0! | 2713.25 | #DIV/0! |
|            |         |         |         | 9.9647E-08  | #DIV/0! | 5045.68 | #DIV/0! |
|            |         |         |         | 1.84835E-07 | 853.9   | #DIV/0! | #DIV/0! |
|            |         |         |         | 4.85321E-07 | #DIV/0! | 4797.23 | #DIV/0! |
|            |         |         |         | 5.60026E-07 | #DIV/0! | 2645.98 | #DIV/0! |
|            |         |         |         | 6.65681E-07 | #DIV/0! | 1993.93 | #DIV/0! |
|            |         |         |         | 7.08446E-07 | #DIV/0! | 1353.4  | #DIV/0! |
|            |         |         |         | 1.04219E-06 | 1461.63 | #DIV/0! | #DIV/0! |
|            |         |         |         | 1.68964E-06 | #DIV/0! | 1464.6  | #DIV/0! |
|            |         |         |         | 1.95887E-06 | #DIV/0! | 1045.87 | #DIV/0! |
|            |         |         |         | 2.2638E-06  | 1779.28 | #DIV/0! | #DIV/0! |
|            |         |         |         | 2.40364E-06 | #DIV/0! | 2803.85 | #DIV/0! |
|            |         |         |         | 4.11195E-06 | #DIV/0! | 3725.43 | #DIV/0! |
|            |         |         |         | 4.83304E-06 | 841.133 | #DIV/0! | #DIV/0! |
|            |         |         |         | 5.14138E-06 | #DIV/0! | 813.125 | #DIV/0! |
|            |         |         |         | 5.29726E-06 | 902.067 | #DIV/0! | #DIV/0! |
|            |         |         |         | 6.63174E-06 | 823.667 | #DIV/0! | #DIV/0! |
|            |         |         |         | 7.38531E-06 | 1566.28 | #DIV/0! | #DIV/0! |
|            |         |         |         | 1.07281E-05 | #DIV/0! | 921.8   | #DIV/0! |
|            |         |         |         | 1.13843E-05 | 971.867 | #DIV/0! | #DIV/0! |
|            |         |         |         | 0.000011981 | 2063.4  | #DIV/0! | #DIV/0! |
|            |         |         |         | 1.21094E-05 | #DIV/0! | 1512.7  | #DIV/0! |
|            |         |         |         | 1.21897E-05 | #DIV/0! | 1811.03 | #DIV/0! |
|            |         |         |         | 1.46391E-05 | #DIV/0! | 886.725 | #DIV/0! |
|            |         |         |         | 1.86911E-05 | #DIV/0! | 2857.98 | #DIV/0! |
|            |         |         |         | 2.08048E-05 | 1107.23 | #DIV/0! | #DIV/0! |
|            |         |         |         | 2.19309E-05 | #DIV/0! | 2458.05 | #DIV/0! |
|            |         |         |         | 0.000024936 | #DIV/0! | 2327.43 | #DIV/0! |
|            |         |         |         | 2.60827E-05 | 1186.15 | #DIV/0! | #DIV/0! |
|            |         |         |         | 2.70827E-05 | #DIV/0! | 666.5   | #DIV/0! |
|            |         |         |         | 2.95773E-05 | #DIV/0! | 559.767 | #DIV/0! |
|            |         |         |         | 2.99178E-05 | 1097.53 | #DIV/0! | #DIV/0! |
|            |         |         |         | 4.22143E-05 | 1424.67 | #DIV/0! | #DIV/0! |
|            |         |         |         | 4.30906E-05 | #DIV/0! | 1590.37 | #DIV/0! |
|            |         |         |         | 4.54133E-05 | #DIV/0! | 2791.85 | #DIV/0! |
|            |         |         |         | 4.76288E-05 | #DIV/0! | 914.475 | #DIV/0! |
|            |         |         |         | 0.000050442 | 1598.55 | #DIV/0! | #DIV/0! |
|            |         |         |         | 0.000063952 | #DIV/0! | 1907.98 | #DIV/0! |
|            |         |         |         | 7.64187E-05 | 2740.08 | #DIV/0! | #DIV/0! |
|            |         |         |         | 9.24413E-05 | #DIV/0! | 649.333 | #DIV/0! |
|            |         |         |         | 9.48009E-05 | #DIV/0! | 1803.87 | #DIV/0! |
|            |         |         |         | 0.000096217 | #DIV/0! | 2260.6  | #DIV/0! |
|            |         |         |         | 0.000123166 | #DIV/0! | 741.6   | #DIV/0! |
|            |         |         |         | 0.000128974 | 883.425 | #DIV/0! | #DIV/0! |
|            |         |         |         | 0.000137893 | 1182.67 | #DIV/0! | #DIV/0! |
|            |         |         |         | 0.000147713 | 950.133 | #DIV/0! | #DIV/0! |

|             |         |         |         |
|-------------|---------|---------|---------|
| 0.000163536 | 1241.67 | #DIV/0! | #DIV/0! |
| 0.000169241 | #DIV/0! | 1778.65 | #DIV/0! |
| 0.000173894 | 554.167 | #DIV/0! | #DIV/0! |
| 0.000186631 | #DIV/0! | 2842.4  | #DIV/0! |
| 0.000189743 | 1807    | #DIV/0! | #DIV/0! |
| 0.000201355 | 715.667 | #DIV/0! | #DIV/0! |
| 0.00022065  | 1090.5  | #DIV/0! | #DIV/0! |
| 0.000236219 | 880.733 | #DIV/0! | #DIV/0! |
| 0.000240663 | 981.7   | #DIV/0! | #DIV/0! |
| 0.000241143 | 1551.95 | #DIV/0! | #DIV/0! |
| 0.000254862 | #DIV/0! | 542.35  | #DIV/0! |
| 0.000261696 | 1360.8  | #DIV/0! | #DIV/0! |
| 0.000321607 | #DIV/0! | 1394.7  | #DIV/0! |
| 0.000322945 | 718.1   | #DIV/0! | #DIV/0! |
| 0.000323384 | 1824.9  | #DIV/0! | #DIV/0! |
| 0.000327412 | 761.3   | #DIV/0! | #DIV/0! |
| 0.000348643 | 1831.43 | #DIV/0! | #DIV/0! |
| 0.000349999 | 3050.45 | #DIV/0! | #DIV/0! |
| 0.000372843 | #DIV/0! | 739     | #DIV/0! |
| 0.000410866 | 952.933 | #DIV/0! | #DIV/0! |
| 0.000437454 | 1489.43 | #DIV/0! | #DIV/0! |
| 0.000450789 | 1204.1  | #DIV/0! | #DIV/0! |
| 0.000454155 | 1003.9  | #DIV/0! | #DIV/0! |
| 0.000460345 | 1088.18 | #DIV/0! | #DIV/0! |
| 0.000463462 | 570.867 | #DIV/0! | #DIV/0! |
| 0.000505873 | 4979.48 | #DIV/0! | #DIV/0! |
| 0.000513722 | #DIV/0! | 1128.63 | #DIV/0! |
| 0.000533933 | 1300.23 | #DIV/0! | #DIV/0! |
| 0.000538193 | 1115.77 | #DIV/0! | #DIV/0! |
| 0.000584095 | 716.1   | #DIV/0! | #DIV/0! |
| 0.000598088 | #DIV/0! | 2876.78 | #DIV/0! |
| 0.000625752 | #DIV/0! | 1225.5  | #DIV/0! |
| 0.000734152 | #DIV/0! | 5174.6  | #DIV/0! |
| 0.000777394 | 1236.68 | #DIV/0! | #DIV/0! |
| 0.00077992  | 1119.9  | #DIV/0! | #DIV/0! |
| 0.000870096 | 1950.93 | #DIV/0! | #DIV/0! |
| 0.000882011 | 1997.33 | #DIV/0! | #DIV/0! |
| 0.000888855 | 604.2   | #DIV/0! | #DIV/0! |
| 0.000890426 | 1082.1  | #DIV/0! | #DIV/0! |
| 0.000902144 | 1461.7  | #DIV/0! | #DIV/0! |
| 0.00102756  | 703.867 | #DIV/0! | #DIV/0! |
| 0.00102916  | #DIV/0! | 1608.15 | #DIV/0! |
| 0.00110202  | 1425.3  | #DIV/0! | #DIV/0! |
| 0.00112547  | 607.2   | #DIV/0! | #DIV/0! |
| 0.00113102  | #DIV/0! | 1012.63 | #DIV/0! |
| 0.00113445  | 1459.93 | #DIV/0! | #DIV/0! |
| 0.00114572  | #DIV/0! | 1649.38 | #DIV/0! |
| 0.00120787  | #DIV/0! | 3478.83 | #DIV/0! |
| 0.00121365  | 915.867 | #DIV/0! | #DIV/0! |
| 0.00123586  | 2206.23 | #DIV/0! | #DIV/0! |
| 0.0013104   | 860.9   | #DIV/0! | #DIV/0! |
| 0.00132951  | #DIV/0! | 1801.33 | #DIV/0! |
| 0.00150191  | 1194.07 | #DIV/0! | #DIV/0! |
| 0.00155925  | #DIV/0! | 2876.78 | #DIV/0! |
| 0.00157417  | 647.9   | #DIV/0! | #DIV/0! |
| 0.00158786  | 687.733 | #DIV/0! | #DIV/0! |
| 0.00161968  | #DIV/0! | 2120.8  | #DIV/0! |
| 0.00163045  | 1408.1  | #DIV/0! | #DIV/0! |
| 0.0016494   | 921.767 | #DIV/0! | #DIV/0! |
| 0.00168099  | #DIV/0! | 1941.77 | #DIV/0! |
| 0.00174479  | 1190.63 | #DIV/0! | #DIV/0! |
| 0.00195157  | 990.275 | #DIV/0! | #DIV/0! |
| 0.00203068  | 1969.55 | #DIV/0! | #DIV/0! |

|            |         |         |         |
|------------|---------|---------|---------|
| 0.00208735 | 580.733 | #DIV/0! | #DIV/0! |
| 0.00212572 | 1006.43 | #DIV/0! | #DIV/0! |
| 0.00216561 | 1455.3  | #DIV/0! | #DIV/0! |
| 0.00217813 | 919.533 | #DIV/0! | #DIV/0! |
| 0.00219282 | 926.95  | #DIV/0! | #DIV/0! |
| 0.0022006  | 601.033 | #DIV/0! | #DIV/0! |
| 0.00224475 | 910.667 | #DIV/0! | #DIV/0! |
| 0.00227488 | 1798.83 | #DIV/0! | #DIV/0! |
| 0.00234218 | 1568.17 | #DIV/0! | #DIV/0! |
| 0.00236417 | 1181.47 | #DIV/0! | #DIV/0! |
| 0.00238186 | 896.833 | #DIV/0! | #DIV/0! |
| 0.00254838 | 797.333 | #DIV/0! | #DIV/0! |
| 0.00259432 | 978.7   | #DIV/0! | #DIV/0! |
| 0.00263234 | #DIV/0! | 502.5   | #DIV/0! |
| 0.002643   | 1132.87 | #DIV/0! | #DIV/0! |
| 0.00269315 | 1170.87 | #DIV/0! | #DIV/0! |
| 0.00297785 | 912.925 | #DIV/0! | #DIV/0! |
| 0.00321352 | #DIV/0! | 1389.65 | #DIV/0! |
| 0.00322378 | #DIV/0! | 904.8   | #DIV/0! |
| 0.00322652 | 2289.55 | #DIV/0! | #DIV/0! |
| 0.00326194 | 1410.67 | #DIV/0! | #DIV/0! |
| 0.00327261 | 1731.97 | #DIV/0! | #DIV/0! |
| 0.00340293 | 1160.83 | #DIV/0! | #DIV/0! |
| 0.00341983 | 1651.27 | #DIV/0! | #DIV/0! |
| 0.00345733 | 589.05  | #DIV/0! | #DIV/0! |
| 0.00348018 | 833.167 | #DIV/0! | #DIV/0! |
| 0.00352655 | 1360.4  | #DIV/0! | #DIV/0! |
| 0.00371126 | 1852.23 | #DIV/0! | #DIV/0! |
| 0.00375569 | #DIV/0! | 786.125 | #DIV/0! |
| 0.00376343 | #DIV/0! | 840.25  | #DIV/0! |
| 0.00391733 | 636.433 | #DIV/0! | #DIV/0! |
| 0.00398522 | 1023.93 | #DIV/0! | #DIV/0! |
| 0.00405115 | 971.967 | #DIV/0! | #DIV/0! |
| 0.00406067 | 1176.03 | #DIV/0! | #DIV/0! |
| 0.00408449 | #DIV/0! | 1649    | #DIV/0! |
| 0.00422574 | #DIV/0! | 1681    | #DIV/0! |
| 0.00443752 | 1022.63 | #DIV/0! | #DIV/0! |
| 0.00447508 | 789.533 | #DIV/0! | #DIV/0! |
| 0.00457413 | 1106.4  | #DIV/0! | #DIV/0! |
| 0.00464574 | 2055.03 | #DIV/0! | #DIV/0! |
| 0.00469559 | 1381.63 | #DIV/0! | #DIV/0! |
| 0.0047597  | 1770.15 | #DIV/0! | #DIV/0! |
| 0.00488948 | 712.667 | #DIV/0! | #DIV/0! |
| 0.00500088 | 722.1   | #DIV/0! | #DIV/0! |
| 0.00505537 | #DIV/0! | 626.367 | #DIV/0! |
| 0.00517155 | 1242.63 | #DIV/0! | #DIV/0! |
| 0.00522133 | #DIV/0! | 728.425 | #DIV/0! |
| 0.0052733  | 816.2   | #DIV/0! | #DIV/0! |
| 0.00546203 | 830.233 | #DIV/0! | #DIV/0! |
| 0.00555705 | 1013.03 | #DIV/0! | #DIV/0! |
| 0.00558779 | 1813.57 | #DIV/0! | #DIV/0! |
| 0.00566591 | 1223.48 | #DIV/0! | #DIV/0! |
| 0.00567808 | #DIV/0! | 1322.53 | #DIV/0! |
| 0.00570045 | 1293.7  | #DIV/0! | #DIV/0! |
| 0.00580212 | 1195.93 | #DIV/0! | #DIV/0! |
| 0.00625913 | 1128.63 | #DIV/0! | #DIV/0! |
| 0.00651163 | 1109.53 | #DIV/0! | #DIV/0! |
| 0.00655967 | 750.433 | #DIV/0! | #DIV/0! |
| 0.0066874  | 1456.2  | #DIV/0! | #DIV/0! |
| 0.00692239 | 875.767 | #DIV/0! | #DIV/0! |
| 0.0069792  | 1130.83 | #DIV/0! | #DIV/0! |
| 0.00700288 | 666.4   | #DIV/0! | #DIV/0! |
| 0.00704083 | 551.6   | #DIV/0! | #DIV/0! |

|             |         |         |          |
|-------------|---------|---------|----------|
| 0.00733163  | #DIV/0! | 1377.93 | #DIV/0!  |
| 0.00735379  | 1087.3  | #DIV/0! | #DIV/0!  |
| 0.00741267  | #DIV/0! | 747.333 | #DIV/0!  |
| 0.00756724  | 695.233 | #DIV/0! | #DIV/0!  |
| 0.00761413  | 973.3   | #DIV/0! | #DIV/0!  |
| 0.00767244  | 1435.4  | #DIV/0! | #DIV/0!  |
| 0.00782946  | #DIV/0! | 1758.35 | #DIV/0!  |
| 0.00784074  | 513.5   | #DIV/0! | #DIV/0!  |
| 0.00789868  | #DIV/0! | 780.867 | #DIV/0!  |
| 0.00805059  | #DIV/0! | 1017.23 | #DIV/0!  |
| 0.00813605  | 853.8   | #DIV/0! | #DIV/0!  |
| 0.00818658  | #DIV/0! | 808.2   | #DIV/0!  |
| 0.00863907  | 2275.6  | #DIV/0! | #DIV/0!  |
| 0.00875497  | #DIV/0! | 1782.73 | #DIV/0!  |
| 0.00882208  | 1139.73 | #DIV/0! | #DIV/0!  |
| 0.00889707  | 1049.33 | #DIV/0! | #DIV/0!  |
| 0.0089305   | #DIV/0! | 2222.03 | #DIV/0!  |
| 0.00939197  | #DIV/0! | 2097.6  | #DIV/0!  |
| 0.00972889  | 1435.83 | #DIV/0! | #DIV/0!  |
| 0.00973922  | 784.067 | #DIV/0! | #DIV/0!  |
| 0.00999085  | 2032.13 | #DIV/0! | #DIV/0!  |
| 0.010709    | #DIV/0! | 1325.53 | #DIV/0!  |
| 0.0108881   | #DIV/0! | 974.875 | #DIV/0!  |
| 0.0109406   | 677.767 | #DIV/0! | #DIV/0!  |
| 0.0113135   | 1305.3  | #DIV/0! | #DIV/0!  |
| 0.0113396   | 1448.3  | #DIV/0! | #DIV/0!  |
| 0.0113734   | 2246.47 | #DIV/0! | #DIV/0!  |
| 0.0114937   | 1471.95 | #DIV/0! | #DIV/0!  |
| 0.0123028   | 1113    | #DIV/0! | #DIV/0!  |
| 0.0123278   | 1589.97 | #DIV/0! | #DIV/0!  |
| 0.0123793   | #DIV/0! | 1441.23 | #DIV/0!  |
| 0.0129701   | 1176.1  | #DIV/0! | #DIV/0!  |
| 0.0132817   | 757.4   | #DIV/0! | #DIV/0!  |
| 0.01386     | 1021.57 | #DIV/0! | #DIV/0!  |
| 0.0139732   | #DIV/0! | 1701.68 | #DIV/0!  |
| 0.0139833   | #DIV/0! | 933.85  | #DIV/0!  |
| 0.0144065   | #DIV/0! | 824.833 | #DIV/0!  |
| 0.0144084   | 1038.1  | #DIV/0! | #DIV/0!  |
| 0.0147131   | #DIV/0! | 682.125 | #DIV/0!  |
| 0.0151179   | 1214.07 | #DIV/0! | #DIV/0!  |
| 0.0153955   | 2372.28 | #DIV/0! | #DIV/0!  |
| 0.0161093   | 863.575 | #DIV/0! | #DIV/0!  |
| 0.0167366   | 646.825 | #DIV/0! | #DIV/0!  |
| 0.0168938   | #DIV/0! | 547.167 | #DIV/0!  |
| 0.0171852   | #DIV/0! | 582.667 | #DIV/0!  |
| 0.0173983   | 1347.73 | #DIV/0! | #DIV/0!  |
| 0.0181886   | #DIV/0! | 657.475 | #DIV/0!  |
| 0.019108    | #DIV/0! | 929.45  | #DIV/0!  |
| 0.0191432   | 1410.23 | #DIV/0! | #DIV/0!  |
| 0.0191741   | #DIV/0! | 1374.88 | #DIV/0!  |
| 0.0193236   | 957.467 | #DIV/0! | #DIV/0!  |
| 0.0198092   | 1386.33 | #DIV/0! | #DIV/0!  |
| 0.0212471   | 1396.1  | #DIV/0! | #DIV/0!  |
| 0.0214823   | 1052.63 | #DIV/0! | #DIV/0!  |
| 0.0214933   | 1535.8  | #DIV/0! | #DIV/0!  |
| 0.0220723   | 999.533 | #DIV/0! | #DIV/0!  |
| 0.0224039   | 934.1   | #DIV/0! | #DIV/0!  |
| 0.0228127   | 1115.33 | #DIV/0! | #DIV/0!  |
| 0.000684238 | 5205.88 | 599.1   | -8.68949 |
| 0.00196971  | 763.9   | 111.7   | -6.83885 |
| 0.00154097  | 707.1   | 118.1   | -5.9873  |
| 0.00485832  | 746.4   | 127.2   | -5.86792 |
| 0.00520775  | 798.4   | 139.8   | -5.71102 |

|         |             |         |         |          |
|---------|-------------|---------|---------|----------|
| -3.4009 | 1.72194E-07 | 1924.85 | 337.8   | -5.69819 |
|         | 0.00300218  | 1103.8  | 194.4   | -5.67798 |
| -3.1868 | 7.78696E-07 | 1476.38 | 267.167 | -5.52604 |
| -2.7686 | 0.000033379 | 798.15  | 155.1   | -5.14603 |
|         | 0.0091901   | 1155.13 | 228.1   | -5.06412 |
| -3.9578 | 1.53856E-06 | 2469.1  | 493.825 | -4.99995 |
| -3.7654 | 7.27169E-11 | 1677.95 | 379.633 | -4.41992 |
|         | 3.34708E-06 | 1000.13 | 229.1   | -4.36549 |
|         | 1.77299E-05 | 728.775 | 171.4   | -4.2519  |
|         | 0.00602602  | 588.467 | 138.8   | -4.23967 |
|         | 3.9221E-06  | 1974.6  | 471.025 | -4.19213 |
|         | 4.96427E-06 | 1501.8  | 365.633 | -4.10739 |
|         | 0.00997874  | 536.2   | 131.2   | -4.08689 |
| -2.8906 | 9.16228E-07 | 1471.33 | 360.5   | -4.08135 |
|         | 3.68184E-06 | 1031.13 | 255.9   | -4.02941 |
| -3.5798 | 4.56543E-07 | 4282.75 | 1079.85 | -3.96606 |
|         | 0.0068649   | 774     | 195.2   | -3.96516 |
|         | 0.00059734  | 566.6   | 143.6   | -3.94568 |
|         | 0.0135497   | 654.033 | 166.867 | -3.9195  |
| -3.5201 | 5.6281E-07  | 1125.43 | 290.6   | -3.87276 |
| -2.5637 | 1.26974E-08 | 6831.63 | 1773.85 | -3.8513  |
|         | 0.000584503 | 743.95  | 195.767 | -3.80019 |
|         | 1.59662E-07 | 1073.67 | 285.825 | -3.75638 |
| -2.4807 | 1.00637E-10 | 1974.78 | 529.167 | -3.73186 |
|         | 0.00110031  | 579.233 | 157     | -3.68938 |
|         | 4.53763E-08 | 1410.48 | 388.6   | -3.62963 |
|         | 0.00500057  | 665.833 | 187.333 | -3.55427 |
|         | 0.0011612   | 581.9   | 164     | -3.54817 |
|         | 1.37077E-06 | 1125.15 | 317.25  | -3.54657 |
| -4.5114 | 6.42713E-07 | 3958.63 | 1134.23 | -3.49016 |
|         | 0.000478003 | 2023.53 | 581.15  | -3.48195 |
|         | 0.00272056  | 1047.17 | 304.95  | -3.4339  |
|         | 0.00157167  | 1186.77 | 354.2   | -3.35056 |
|         | 2.96666E-05 | 1517.3  | 455.167 | -3.3335  |
|         | 0.000036902 | 707.367 | 212.2   | -3.33349 |
| -3.9628 | 9.09737E-05 | 2525.93 | 764.075 | -3.30586 |
|         | 0.000105679 | 1628.03 | 493.8   | -3.29695 |
|         | 0.00156291  | 676.825 | 206.1   | -3.28396 |
|         | 5.78266E-05 | 1606.6  | 491.65  | -3.26777 |
|         | 9.7112E-06  | 598.15  | 184.95  | -3.23412 |
|         | 0.00158211  | 1090.78 | 338.95  | -3.2181  |
| -2.3012 | 0.000326763 | 1072.53 | 337.5   | -3.17788 |
|         | 0.000110655 | 1247.23 | 393.333 | -3.17093 |
| -3.2591 | 1.66758E-06 | 4971.93 | 1569.23 | -3.1684  |
|         | 0.000740907 | 1391.1  | 440.15  | -3.16051 |
|         | 0.00327954  | 1120.75 | 355.7   | -3.15083 |
| -2.707  | 1.2763E-07  | 2460.78 | 796.25  | -3.09046 |
|         | 1.18027E-06 | 937.95  | 303.775 | -3.08765 |
|         | 2.99728E-08 | 711.8   | 232.433 | -3.06238 |
|         | 0.0143034   | 838.1   | 274.1   | -3.05764 |
|         | 0.000460424 | 684.975 | 225.05  | -3.04366 |
|         | 0.01482     | 599.975 | 197.6   | -3.03631 |
|         | 0.01316     | 1184.53 | 390.467 | -3.03361 |
|         | 1.06551E-05 | 861.133 | 284.1   | -3.03109 |
|         | 0.000556746 | 738.667 | 244     | -3.02732 |
|         | 2.64359E-06 | 1193.23 | 394.8   | -3.02235 |
|         | 1.67784E-06 | 996.25  | 331.567 | -3.00467 |
|         | 0.00119851  | 790.05  | 264.5   | -2.98696 |
|         | 0.000127917 | 3367.1  | 1130.53 | -2.97835 |
|         | 4.33693E-07 | 4082.5  | 1373.65 | -2.97201 |
|         | 0.000449966 | 760.367 | 257.4   | -2.95403 |
|         | 2.26489E-05 | 903.625 | 306.333 | -2.94981 |
|         | 1.40251E-06 | 1582.48 | 537.333 | -2.94505 |

|         |             |         |         |          |
|---------|-------------|---------|---------|----------|
|         | 0.00708712  | 754.5   | 256.7   | -2.93923 |
| #DIV/0! | 8.52742E-06 | 990     | 338.8   | -2.92208 |
|         | 1.56158E-06 | 1949.4  | 670.933 | -2.9055  |
|         | 6.93398E-05 | 966.35  | 336.6   | -2.87092 |
|         | 1.02276E-08 | 779.3   | 272.467 | -2.86017 |
|         | 0.00482892  | 910.825 | 319.533 | -2.85049 |
|         | 8.34371E-05 | 554.633 | 197.4   | -2.80969 |
| -2.9935 | 0.000171862 | 2821.15 | 1005    | -2.80711 |
| -2.3989 | 0.00379872  | 1038.73 | 370.55  | -2.80322 |
|         | 0.00177557  | 511.667 | 183     | -2.79599 |
|         | 0.000956729 | 811.975 | 290.7   | -2.79317 |
| -3.0012 | 2.56343E-05 | 4537.7  | 1635.28 | -2.77488 |
|         | 0.000158957 | 881.55  | 318.525 | -2.7676  |
| -2.3042 | 2.74524E-06 | 1152.05 | 416.725 | -2.76453 |
|         | 0.000366353 | 1527.78 | 552.725 | -2.76408 |
|         | 1.46361E-05 | 8320.8  | 3020.25 | -2.755   |
|         | 0.000542235 | 955.825 | 347.7   | -2.74899 |
|         | 0.00217556  | 565.6   | 207.15  | -2.73039 |
|         | 0.000313717 | 1256.05 | 460.3   | -2.72876 |
|         | 0.00253483  | 628.725 | 231.15  | -2.71999 |
|         | 0.000137904 | 536.5   | 197.6   | -2.71508 |
|         | 9.23139E-07 | 821.25  | 303.1   | -2.7095  |
|         | 0.000385737 | 866.825 | 320.267 | -2.70657 |
|         | 0.000040172 | 774.733 | 287.55  | -2.69426 |
| -2.1644 | 3.79522E-06 | 1533.2  | 570.325 | -2.68829 |
|         | 9.49407E-05 | 3543.75 | 1318.33 | -2.68807 |
|         | 0.000841577 | 1698.13 | 631.85  | -2.68754 |
|         | 0.000531136 | 763.65  | 284.733 | -2.68198 |
|         | 0.00424008  | 614.7   | 230.35  | -2.66855 |
|         | 0.000367233 | 971.85  | 364.5   | -2.66626 |
|         | 0.0019774   | 1781.65 | 671.85  | -2.65186 |
| -2.851  | 3.97052E-07 | 3976.33 | 1501.8  | -2.64771 |
|         | 0.00112216  | 672.7   | 254.333 | -2.64495 |
|         | 2.61466E-05 | 1049.63 | 396.925 | -2.64439 |
| -3.9674 | 0.0115025   | 781.825 | 296.325 | -2.6384  |
|         | 0.00298878  | 922.625 | 349.975 | -2.63626 |
|         | 1.11019E-05 | 895.1   | 341.7   | -2.61955 |
| -2.0051 | 8.14758E-05 | 685.167 | 262.3   | -2.61215 |
|         | 0.00103254  | 1887.03 | 723.7   | -2.60748 |
|         | 0.00248403  | 557.925 | 214.067 | -2.60631 |
|         | 4.09372E-06 | 3060.13 | 1174.28 | -2.60597 |
|         | 0.00220373  | 1439.78 | 552.625 | -2.60534 |
|         | 0.000370285 | 507.133 | 195.3   | -2.59669 |
| -3.0297 | 0.00897882  | 2049.8  | 799.3   | -2.56449 |
|         | 0.000364684 | 2127.03 | 833.8   | -2.551   |
| -2.693  | 1.67773E-10 | 8981.73 | 3521.08 | -2.55085 |
|         | 0.000150255 | 749.5   | 294.4   | -2.54586 |
| -3.2733 | 2.84651E-06 | 2674.95 | 1052.75 | -2.54092 |
|         | 0.00562237  | 751.2   | 296.5   | -2.53356 |
|         | 0.00434654  | 1472.1  | 581.225 | -2.53275 |
|         | 6.43872E-05 | 907.55  | 361.325 | -2.51173 |
|         | 0.00508096  | 582.225 | 232.4   | -2.50527 |
|         | 0.00153547  | 894.2   | 358.2   | -2.49637 |
| -2.1098 | 9.15288E-06 | 1000.18 | 401.125 | -2.49342 |
|         | 0.0100545   | 583.533 | 234.4   | -2.48948 |
|         | 0.000284962 | 1825.25 | 736.3   | -2.47895 |
|         | 0.00680676  | 548.9   | 222.1   | -2.47141 |
|         | 2.90182E-07 | 1202.23 | 486.567 | -2.47083 |
|         | 0.0115945   | 643     | 261.75  | -2.45654 |
| -2.4719 | 3.54374E-07 | 11613.7 | 4728.63 | -2.45603 |
|         | 0.000185713 | 3622.33 | 1475.87 | -2.45437 |
|         | 0.0102017   | 948.033 | 386.9   | -2.45033 |
|         | 0.000239819 | 617.55  | 252.033 | -2.45027 |

|         |             |         |         |          |
|---------|-------------|---------|---------|----------|
|         | 0.000152766 | 611.7   | 249.9   | -2.44778 |
|         | 7.24771E-05 | 600.475 | 245.367 | -2.44726 |
|         | 0.0124142   | 697.15  | 285.55  | -2.44143 |
|         | 2.51316E-06 | 3671.18 | 1505.23 | -2.43895 |
|         | 1.23631E-05 | 2837.93 | 1164.48 | -2.43709 |
|         | 1.70589E-06 | 649.9   | 266.8   | -2.43591 |
|         | 0.00680189  | 578.7   | 238.1   | -2.43049 |
|         | 3.03252E-05 | 2437.95 | 1003.43 | -2.42963 |
|         | 0.000287406 | 562.7   | 231.733 | -2.42822 |
|         | 2.41063E-06 | 1249.9  | 516.55  | -2.41971 |
|         | 0.00374529  | 717.9   | 297.567 | -2.41257 |
|         | 0.00390536  | 959.333 | 397.7   | -2.4122  |
|         | 0.000377391 | 2665.73 | 1105.45 | -2.41144 |
|         | 0.000637094 | 1629.83 | 676.65  | -2.40867 |
|         | 0.000713088 | 1304.25 | 546.075 | -2.38841 |
|         | 0.000642454 | 863.775 | 361.667 | -2.38832 |
|         | 0.00232162  | 2438.58 | 1023.9  | -2.38165 |
|         | 2.3861E-06  | 1415.8  | 595.15  | -2.3789  |
|         | 0.000696625 | 852.625 | 358.75  | -2.37666 |
|         | 3.03068E-05 | 1392.33 | 586.275 | -2.37487 |
|         | 0.000514185 | 778.75  | 328.15  | -2.37315 |
|         | 0.0146624   | 674.3   | 284.55  | -2.36971 |
| -2.5454 | 7.62999E-05 | 1335.18 | 563.867 | -2.36789 |
|         | 7.77988E-05 | 670.1   | 283.45  | -2.36409 |
|         | 1.22064E-05 | 1701.08 | 719.625 | -2.36384 |
|         | 0.000491127 | 589.975 | 249.65  | -2.36321 |
|         | 6.55249E-05 | 2100.15 | 894.425 | -2.34804 |
| -2.2378 | 1.51705E-05 | 2100.93 | 895.15  | -2.34701 |
|         | 3.79789E-05 | 914.175 | 391.05  | -2.33774 |
|         | 2.87109E-06 | 1417.98 | 606.7   | -2.33719 |
|         | 9.43872E-05 | 987.475 | 423.433 | -2.33207 |
|         | 1.301E-08   | 2390.25 | 1025.48 | -2.33087 |
|         | 0.00038344  | 1199.45 | 515.95  | -2.32474 |
|         | 0.00402824  | 4024.18 | 1732    | -2.32343 |
|         | 1.54606E-06 | 20770.5 | 8957.1  | -2.31889 |
|         | 0.00433558  | 1165    | 505.65  | -2.30397 |
|         | 0.00126798  | 632.9   | 274.825 | -2.30292 |
|         | 2.39436E-07 | 4388.6  | 1908.63 | -2.29935 |
|         | 2.48964E-06 | 2471.4  | 1078.8  | -2.29088 |
| -2.4418 | 0.000125588 | 4322.48 | 1887.48 | -2.29008 |
|         | 0.00258139  | 1975.48 | 863.7   | -2.28722 |
|         | 0.00613347  | 582.433 | 255.2   | -2.28226 |
|         | 6.69532E-06 | 20091.3 | 8806.5  | -2.28142 |
|         | 0.0034495   | 504.225 | 221.2   | -2.2795  |
|         | 5.87315E-05 | 648.833 | 285.1   | -2.27581 |
|         | 0.00327323  | 1576.5  | 692.833 | -2.27544 |
|         | 0.000228571 | 3094.48 | 1361.73 | -2.27247 |
|         | 2.67043E-08 | 3531.08 | 1553.98 | -2.27229 |
|         | 0.000349237 | 556.7   | 245     | -2.27224 |
|         | 0.00897023  | 986.95  | 435     | -2.26885 |
|         | 0.0010106   | 2858.48 | 1260.63 | -2.26751 |
|         | 0.000191984 | 1034.65 | 456.475 | -2.26661 |
|         | 5.32414E-06 | 941.2   | 415.625 | -2.26454 |
|         | 0.00185205  | 770.4   | 340.4   | -2.26322 |
|         | 1.64236E-06 | 1380.67 | 610.5   | -2.26153 |
|         | 0.00445644  | 1854.6  | 820.35  | -2.26074 |
|         | 0.00150818  | 1383.33 | 612.025 | -2.26024 |
|         | 5.47855E-09 | 1623.1  | 721.2   | -2.25055 |
|         | 0.00112772  | 851.5   | 378.8   | -2.24789 |
| -3.6739 | 0.000325451 | 566.55  | 252.067 | -2.24762 |
|         | 2.19208E-09 | 6818.63 | 3040.5  | -2.2426  |
|         | 0.0115356   | 963.333 | 429.7   | -2.24187 |
|         | 0.000370687 | 1395.03 | 622.933 | -2.23946 |



|         |             |         |         |          |
|---------|-------------|---------|---------|----------|
|         | 0.0035665   | 1008.07 | 450.2   | -2.23915 |
|         | 0.000191993 | 1034.37 | 462.967 | -2.23421 |
| -2.707  | 1.57882E-05 | 834.425 | 373.5   | -2.23407 |
|         | 0.000135365 | 3691.9  | 1652.75 | -2.23379 |
|         | 0.00325228  | 594.367 | 266.2   | -2.23278 |
|         | 0.00602102  | 593.7   | 266.2   | -2.23028 |
|         | 0.00127468  | 1591.8  | 714.65  | -2.22738 |
|         | 0.000240926 | 1175.53 | 528     | -2.22637 |
|         | 0.00128394  | 617.35  | 277.4   | -2.22549 |
|         | 2.70885E-05 | 862.8   | 387.9   | -2.22428 |
| -2.1638 | 3.19177E-05 | 7398.28 | 3326.55 | -2.22401 |
|         | 6.35786E-06 | 3227.93 | 1453.5  | -2.22079 |
|         | 8.65716E-08 | 4266.65 | 1928.13 | -2.21285 |
| -2.8328 | 2.9246E-07  | 1096.43 | 496.8   | -2.20697 |
|         | 0.000327532 | 3587.83 | 1627.68 | -2.20426 |
|         | 3.14866E-05 | 1329.73 | 603.525 | -2.20326 |
|         | 0.00102571  | 729.125 | 331.533 | -2.19925 |
|         | 0.010243    | 959.925 | 437.4   | -2.19462 |
|         | 0.00789657  | 800.675 | 365.2   | -2.19243 |
|         | 0.00214921  | 934.6   | 428.8   | -2.17957 |
|         | 0.000248153 | 1371.48 | 630.125 | -2.17651 |
|         | 0.000100795 | 950.2   | 437.2   | -2.17338 |
|         | 8.88307E-05 | 918.625 | 422.85  | -2.17246 |
|         | 0.000450212 | 609.075 | 280.433 | -2.17191 |
|         | 0.000156058 | 1049.67 | 483.8   | -2.16963 |
|         | 0.000355388 | 1455.73 | 671.075 | -2.16924 |
|         | 0.0110372   | 788.575 | 363.9   | -2.16701 |
|         | 0.00347669  | 1571.58 | 725.725 | -2.16552 |
| -2.4316 | 4.76763E-05 | 682.9   | 315.4   | -2.16519 |
|         | 0.00183746  | 2245.1  | 1037    | -2.165   |
|         | 3.66086E-06 | 749.967 | 346.85  | -2.16222 |
|         | 0.00478711  | 713.525 | 330.333 | -2.16002 |
|         | 2.41956E-06 | 20949.9 | 9704.83 | -2.15871 |
|         | 0.00168126  | 705.867 | 327.2   | -2.15729 |
|         | 0.00555848  | 914.933 | 424.3   | -2.15634 |
|         | 6.07044E-05 | 2571.58 | 1193    | -2.15555 |
|         | 0.000109438 | 1078.33 | 502.875 | -2.14432 |
|         | 0.00822885  | 1861.43 | 868.825 | -2.14246 |
|         | 0.00874526  | 557.033 | 260.6   | -2.1375  |
|         | 0.000957578 | 1423    | 666.975 | -2.13351 |
|         | 0.00107692  | 817.575 | 383.55  | -2.1316  |
|         | 0.00691255  | 1663.68 | 781.45  | -2.12896 |
|         | 2.69861E-05 | 603.2   | 284.2   | -2.12245 |
|         | 4.72697E-05 | 901.9   | 425.725 | -2.1185  |
|         | 0.0081841   | 1470.98 | 694.6   | -2.11773 |
|         | 0.00012728  | 1071.5  | 506.125 | -2.11707 |
|         | 9.64998E-05 | 868.125 | 411.1   | -2.11171 |
| -2.1941 | 0.00744019  | 3592.75 | 1708.4  | -2.10299 |
|         | 5.59424E-05 | 752.9   | 358.4   | -2.10073 |
|         | 0.000153237 | 920.75  | 438.7   | -2.09881 |
|         | 0.0101014   | 1712.25 | 816.05  | -2.09822 |
|         | 1.33052E-06 | 1183.5  | 564.067 | -2.09816 |
|         | 1.64926E-06 | 887.5   | 423.05  | -2.09786 |
|         | 0.000200426 | 882.8   | 421.325 | -2.09529 |
|         | 0.00353059  | 841.767 | 401.8   | -2.09499 |
|         | 0.00534184  | 608.925 | 291.25  | -2.09073 |
|         | 1.20847E-05 | 1562.27 | 749.25  | -2.08511 |
|         | 6.22907E-05 | 1342.27 | 643.867 | -2.0847  |
|         | 0.000845224 | 922.925 | 443.2   | -2.08241 |
|         | 4.96074E-05 | 688.9   | 331.7   | -2.07688 |
|         | 0.000171882 | 824.367 | 398.1   | -2.07075 |
|         | 0.000014332 | 1695.37 | 822.167 | -2.06207 |
|         | 4.70116E-06 | 1722.65 | 835.775 | -2.06114 |

|         |             |         |         |          |
|---------|-------------|---------|---------|----------|
| -2.0578 | 0.00416114  | 2981.33 | 1447.25 | -2.05999 |
|         | 0.00310683  | 2586.38 | 1256.18 | -2.05893 |
| -2.4412 | 0.00344065  | 2014.75 | 978.7   | -2.0586  |
|         | 2.66553E-05 | 1110.43 | 539.75  | -2.0573  |
|         | 0.00655447  | 1068.83 | 520.167 | -2.05479 |
|         | 0.00190708  | 562.6   | 275.3   | -2.04359 |
|         | 8.75715E-06 | 6636.73 | 3248.43 | -2.04306 |
|         | 0.00795131  | 3433.88 | 1687.55 | -2.03483 |
|         | 9.0713E-06  | 3301.08 | 1622.6  | -2.03444 |
|         | 0.00100128  | 4209.53 | 2069.5  | -2.03408 |
|         | 0.00346303  | 1132.2  | 558.2   | -2.02831 |
|         | 0.000200405 | 2479.3  | 1228.47 | -2.01821 |
|         | 0.000017538 | 5137.68 | 2547.98 | -2.01638 |
|         | 0.000255527 | 1048.43 | 521.575 | -2.01011 |
|         | 0.00872177  | 3308.58 | 1646.93 | -2.00894 |
|         | 0.000244191 | 1140.98 | 569.075 | -2.00496 |
|         | 0.000559853 | 944.95  | 472     | -2.00201 |
|         | 0.000105895 | 591.4   | 295.7   | -2       |
|         | 3.60443E-05 | 933.575 | 1888.33 | 2.02268  |
|         | 0.00267261  | 471.7   | 977.275 | 2.07181  |
|         | 0.00103682  | 1396.23 | 2898.03 | 2.07561  |
|         | 6.12809E-06 | 1494.05 | 3120.65 | 2.08872  |
|         | 2.72283E-05 | 10704.5 | 22706   | 2.12117  |
|         | 1.0734E-06  | 4184.9  | 8956.28 | 2.14014  |
|         | 0.000245527 | 3221.53 | 6929.15 | 2.15089  |
|         | 0.00067756  | 4495.6  | 9680.65 | 2.15336  |
| 2.7242  | 0.000127583 | 557.95  | 1234.9  | 2.21328  |
|         | 0.00125959  | 507.5   | 1189.93 | 2.34468  |
|         | 0.000255385 | 3031.4  | 7626.48 | 2.51583  |
| 2.56449 | 1.4143E-07  | 587.033 | 1566.38 | 2.66829  |
|         | 6.25096E-06 | 5583.13 | 15050.8 | 2.69576  |
|         | 3.06928E-05 | 894.15  | 2431.1  | 2.7189   |
| 2.53328 | 5.93484E-08 | 1779.75 | 5538.65 | 3.11204  |
| 2.83623 | 1.84376E-05 | 780.725 | 2472.18 | 3.16651  |
| 4.48866 | 5.15935E-06 | 1204.55 | 3852.13 | 3.19798  |
| #DIV/0! | 2.75282E-06 | 285.3   | 915.033 | 3.20727  |
|         | 0.000202619 | 1591.13 | 7296.43 | 4.5857   |
| 4.39035 | 1.44118E-07 | 1081.93 | 4964.28 | 4.58834  |
| 2.51951 | 7.62494E-07 | 482.3   | 2243.13 | 4.65089  |
| 5.84566 | 4.47304E-09 | 2043.88 | 13878.2 | 6.79015  |
| 2.54477 | 1.06891E-06 | 1056.5  | 7320.03 | 6.92856  |
| -4.4486 | 0.000157707 | 514.4   | #DIV/0! | #DIV/0!  |
| -3.9768 | 3.38128E-08 | 2300.33 | #DIV/0! | #DIV/0!  |
| -2.4728 | 1.87498E-06 | 2260.73 | #DIV/0! | #DIV/0!  |
| -2.0563 | 1.55173E-10 | 1610.45 | #DIV/0! | #DIV/0!  |
| #DIV/0! | 0.000306575 | 3612.43 | #DIV/0! | #DIV/0!  |
| #DIV/0! | 1.01865E-07 | 1246.2  | #DIV/0! | #DIV/0!  |
|         | 3.80403E-07 | 779.4   | #DIV/0! | #DIV/0!  |
|         | 9.33926E-07 | 853.05  | #DIV/0! | #DIV/0!  |
|         | 2.39764E-06 | 1425.5  | #DIV/0! | #DIV/0!  |
|         | 5.71351E-06 | 642.275 | #DIV/0! | #DIV/0!  |
|         | 6.18525E-06 | 2069.33 | #DIV/0! | #DIV/0!  |
|         | 7.78687E-06 | 1052.27 | #DIV/0! | #DIV/0!  |
|         | 2.66375E-05 | 738     | #DIV/0! | #DIV/0!  |
|         | 3.07208E-05 | 1046.33 | #DIV/0! | #DIV/0!  |
|         | 4.45733E-05 | 767.567 | #DIV/0! | #DIV/0!  |
|         | 5.89058E-05 | 1027.77 | #DIV/0! | #DIV/0!  |
|         | 0.000077445 | 626.133 | #DIV/0! | #DIV/0!  |
|         | 7.89578E-05 | #DIV/0! | 734.067 | #DIV/0!  |
|         | 8.73278E-05 | 791.15  | #DIV/0! | #DIV/0!  |
|         | 0.000101458 | 1045.93 | #DIV/0! | #DIV/0!  |
|         | 0.000101461 | #DIV/0! | 976.1   | #DIV/0!  |
|         | 0.00010876  | 1054.57 | #DIV/0! | #DIV/0!  |

|             |         |         |         |
|-------------|---------|---------|---------|
| 0.000250791 | 587.067 | #DIV/0! | #DIV/0! |
| 0.000345086 | 890.775 | #DIV/0! | #DIV/0! |
| 0.000443336 | 1675    | #DIV/0! | #DIV/0! |
| 0.000476999 | 826.267 | #DIV/0! | #DIV/0! |
| 0.000485959 | 1038.67 | #DIV/0! | #DIV/0! |
| 0.000495941 | 747.8   | #DIV/0! | #DIV/0! |
| 0.00050216  | 762.367 | #DIV/0! | #DIV/0! |
| 0.000696882 | 1049.63 | #DIV/0! | #DIV/0! |
| 0.000926924 | 799.267 | #DIV/0! | #DIV/0! |
| 0.00092721  | 990.125 | #DIV/0! | #DIV/0! |
| 0.00126859  | 1870.17 | #DIV/0! | #DIV/0! |
| 0.0013161   | 769.367 | #DIV/0! | #DIV/0! |
| 0.00135082  | 766.9   | #DIV/0! | #DIV/0! |
| 0.00138237  | 795.65  | #DIV/0! | #DIV/0! |
| 0.00141141  | 634.067 | #DIV/0! | #DIV/0! |
| 0.00148773  | 596.6   | #DIV/0! | #DIV/0! |
| 0.00152192  | 666.933 | #DIV/0! | #DIV/0! |
| 0.00159938  | 542.3   | #DIV/0! | #DIV/0! |
| 0.00171205  | 578.975 | #DIV/0! | #DIV/0! |
| 0.00178321  | 883.433 | #DIV/0! | #DIV/0! |
| 0.00215043  | 608.433 | #DIV/0! | #DIV/0! |
| 0.00242887  | 901.033 | #DIV/0! | #DIV/0! |
| 0.00276713  | 538.6   | #DIV/0! | #DIV/0! |
| 0.00304161  | 992.975 | #DIV/0! | #DIV/0! |
| 0.00323416  | 1109.68 | #DIV/0! | #DIV/0! |
| 0.0032388   | 519.667 | #DIV/0! | #DIV/0! |
| 0.00329759  | 597.367 | #DIV/0! | #DIV/0! |
| 0.00351841  | 532.433 | #DIV/0! | #DIV/0! |
| 0.00359768  | 863.767 | #DIV/0! | #DIV/0! |
| 0.00427416  | 824.825 | #DIV/0! | #DIV/0! |
| 0.0043701   | #DIV/0! | 673.575 | #DIV/0! |
| 0.00440119  | 700.167 | #DIV/0! | #DIV/0! |
| 0.00501597  | 513.833 | #DIV/0! | #DIV/0! |
| 0.0051229   | 834.533 | #DIV/0! | #DIV/0! |
| 0.00565035  | 1262.77 | #DIV/0! | #DIV/0! |
| 0.0056674   | 798.475 | #DIV/0! | #DIV/0! |
| 0.00615815  | 1039.63 | #DIV/0! | #DIV/0! |
| 0.00624614  | 889.067 | #DIV/0! | #DIV/0! |
| 0.00658777  | 560.5   | #DIV/0! | #DIV/0! |
| 0.0073904   | 562.7   | #DIV/0! | #DIV/0! |
| 0.00741146  | 502.033 | #DIV/0! | #DIV/0! |
| 0.00781869  | 716.867 | #DIV/0! | #DIV/0! |
| 0.00889751  | 1048.87 | #DIV/0! | #DIV/0! |
| 0.00921297  | 775.175 | #DIV/0! | #DIV/0! |
| 0.00927798  | 593.933 | #DIV/0! | #DIV/0! |
| 0.00958229  | #DIV/0! | 661.967 | #DIV/0! |
| 0.00970533  | 694.775 | #DIV/0! | #DIV/0! |
| 0.0105827   | 578.333 | #DIV/0! | #DIV/0! |
| 0.0108981   | 1066.6  | #DIV/0! | #DIV/0! |
| 0.0119659   | 1050.57 | #DIV/0! | #DIV/0! |
| 0.0121865   | 543.65  | #DIV/0! | #DIV/0! |
| 0.0144812   | #DIV/0! | 1498.13 | #DIV/0! |

-3.148  
-2.8931  
-2.8761  
-2.7406  
-2.7022  
-2.6885  
-2.6712  
-2.6573  
-2.5752  
-2.4988  
-2.4016





formula contains a reference to a blank cell or to a cell that contains zero as a divisor.
